# Supplementary material for: Green and sustainable dearomative cycloaddition of arenes via visible-light energy transfer catalysis: an atom-economical synthesis of N-heterocyclic skeletons
Source: Royal Society of Chemistry journal article supplement (doi:10.1039/d5gc04174k), 2025-12-26

## Supporting Information

### For

#### **Green and sustainable dearomative cycloaddition of arenes via visible-light energy transfer catalysis: an atom economic synthesis of *N*-heterocyclic skeletons**

Babasaheb Sopan Gore<sup>†</sup>, Hsing-Yin Chen<sup>\*†</sup> and Jeh-Jeng Wang<sup>\*†‡</sup>

<sup>†</sup>Department of Medicinal and Applied Chemistry, Kaohsiung Medical University, No. 100, Shih-Chuan 1<sup>st</sup> Rd, Sanmin District, Kaohsiung City, 807 (Taiwan).

<sup>‡</sup>Department of Medical Research, Kaohsiung Medical University Hospital, No. 100, Tzyou 1<sup>st</sup> Rd, Sanmin District, Kaohsiung City, 807 (Taiwan).

E-mail: [jjwang@kmu.edu.tw](mailto:jjwang@kmu.edu.tw)

## TABLE OF CONTENTS

|                                                    |      |
|----------------------------------------------------|------|
| MATERIALS AND METHODS.....                         | S3   |
| EXPERIMENTAL DATA.....                             | S5   |
| EVALUATION OF GREEN METRICS OF THE PROCESS.....    | S7   |
| CONTROL STUDIES.....                               | S9   |
| COMPUTATIONAL METHODS.....                         | S11  |
| SPECTRAL CHARACTERIZATION.....                     | S24  |
| REFERENCES.....                                    | S54  |
| COSY and NOSY SPECTRUM.....                        | S55  |
| COPIES OF $^1\text{H}$ , and $^{13}\text{C}$ ..... | S57  |
| X-RAY CRYSTAL DATA.....                            | S171 |

## 1. MATERIALS AND METHODS

All air- and moisture-insensitive reactions were carried out under ambient atmosphere and monitored by thin layer chromatography (TLC). Concentration under reduced pressure was performed by rotary evaporation at 35-45 °C at an appropriate pressure. Purified compounds were further dried under high vacuum. Yields refer to purified and spectroscopically pure compounds, unless otherwise stated. Mass spectra and High-Resolution Mass spectral (HRMS) data was carried out using an Agilent6890N GC (JEOL JMS-700) TOF instrument, and the ion source is electrospray ionization (ESI), electronic ionization (EI), CI, and FAB as ion source at National Taiwan Normal University, Taipei City, Taiwan and ESI-TOF(FT-MS solariX) at National Sun Yat-Sen University, Kaohsiung, Taiwan, and LTQ Orbitrap XL (Thermo Fischer Scientific) at National Chung Hsing University. Liquid-chromatography mass spectra (LCMS) were measured using the LC-MS/MS-8045 (Shimadzu Corporation, Japan) at Kaohsiung Medical University, Kaohsiung, Taiwan. Melting points were determined on an EZ-Melt (Automated melting point apparatus).

### Solvents

Bottle grade 2-MeTHF, MeOH, DMSO, Anisole and Ethyl acetate were purchased from Alfa acer. All deuterated solvents were purchased from Sigma-Aldrich.

### Chromatography

Thin layer chromatography (TLC) was performed using Merck TLC aluminum sheets (silica gel 60 F254) and visualized by fluorescence quenching under UV light. Flash column chromatography was performed using silica gel (40-63  $\mu\text{m}$  particle size) purchased from Merck.

### Photochemistry

All reactions with blue light were carried out using 1 x 40 W Kessil Blue LED (Kessil A160WE Controllable LED Aquarium Light) lamp purchased from Amazon (Taiwan) with an output centered at a wavelength of approximately  $\lambda_{\text{max}} = 456 \text{ nm}$ . The reaction vials were cooled with a fan while being irradiated under blue light.

See the following links for more details.

[https://www.kessil.com/aquarium/saltwater\\_A160.php](https://www.kessil.com/aquarium/saltwater_A160.php)

[https://www.kessil.com/support/downloadfiles/aquarium/A160WE\\_UserManual.pdf](https://www.kessil.com/support/downloadfiles/aquarium/A160WE_UserManual.pdf)

## Spectroscopy and Instruments

$^1\text{H}$ ,  $^{13}\text{C}$ , and DEPT NMR spectra were recorded on a 400 and 600 MHz Varian Unity Plus or Varian Mercury plus spectrometer or JEOL ECS-400. The chemical shift ( $\delta$ ) values are reported in ppm, and the coupling constants ( $J$ ) are given in Hz. For  $^1\text{H}$  NMR:  $\text{CDCl}_3$ ,  $\delta$  7.26;  $\text{CD}_3\text{CN}$ ,  $\delta$  1.96;  $\text{CD}_2\text{Cl}_2$ ,  $\delta$  5.32;  $(\text{CD}_3)_2\text{SO}$ ,  $\delta$  2.50; For  $^{13}\text{C}$  NMR:  $\text{CDCl}_3$ ,  $\delta$  77.16; 1.32;  $\text{CD}_2\text{Cl}_2$ ,  $\delta$  53.84;  $(\text{CD}_3)_2\text{SO}$ ,  $\delta$  39.52.<sup>1</sup> The abbreviations used are as follows: s = singlet, d = doublet, t = triplet, q = quartet, dd = doublet of doublet, ddd = doublet of doublet of doublet, dt = doublet of triplets, td = triplet of doublet, m = multiplet, br = broad; coupling constants in Hz; integration.

## Starting materials

All substrates were used as received from commercial suppliers, or prepared according to published procedures, respectively, unless otherwise stated. Photocatalysts were purchased from Sigma Aldrich, TCI and Alfa Aesar, and stored in an under vacuum/dark hood cabinet. Aldehydes, Alkenes, *N*-substituted amines were purchased from Sigma-Aldrich, Acros, TCI, or Alfa Aesar.

## 2. EXPERIMENTAL DATA

### General procedure and reaction condition optimization for cascade dearomatization

#### a) General procedure for dearomatization

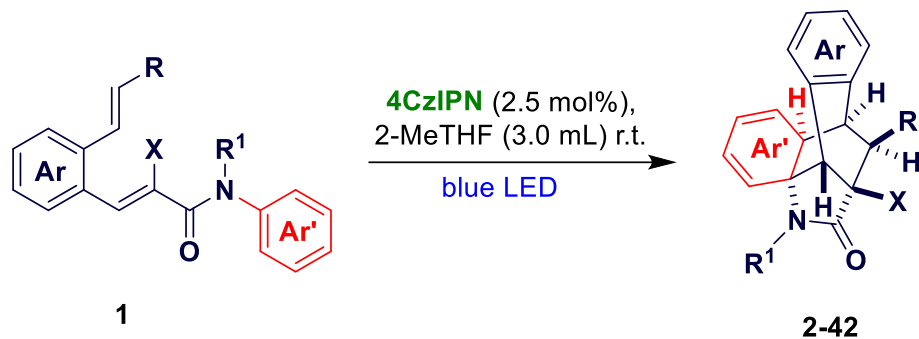

A clean vial (5 mL) equipped with a magnetic stir bar were added to **3** (0.2 mmol) 4CzIPN (2.5 mol%) and 2-MeTHF (3.0 mL) at room temperature, and then placed at a distance of approx. 3 cm from a 40 W blue LED lamp, and the solution was stirred at room temperature under visible-light irradiation for 6-24 h. The progress of the reaction was monitored by thin layer chromatography. When the reaction was complete, the solvent was removed under reduced pressure. The residue was purified by column chromatography on silica gel eluting with Hex/EA = 80:20-60:40 to afford the dearomative cyclization product **2-42** derivatives.

#### b) General procedure for gram scale synthesis of **2**.

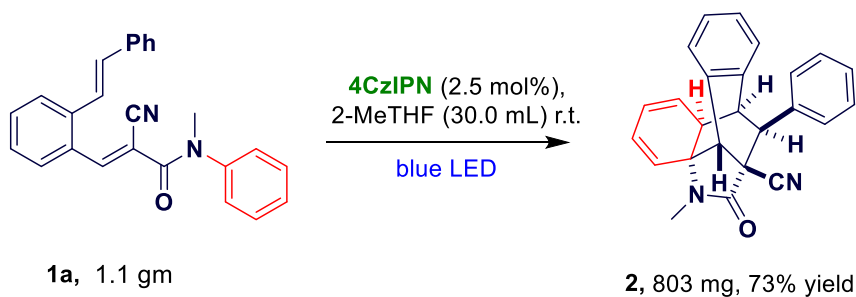

A clean vial (5 mL) equipped with a magnetic stir bar were added to **1a** (3.0 mmol), 4CzIPN (2.5 mol%) and 2-MeTHF (30.0 mL) at room temperature, and then placed at a distance of approx. 3 cm from a 40 W blue LED lamp, and the solution was stirred at room temperature under visible-light irradiation for 24 h. The progress of the reaction was monitored by thin layer chromatography. When the reaction was complete, the solvent was removed under reduced pressure. The residue was purified by column chromatography on silica gel eluting with Hex/EA = 80:20-60:40 to afford the dearomative cyclization product **2** derivatives in 73% (803 mg) yield.

c. General Procedure for the Synthesis of analogous **1**.<sup>1</sup>

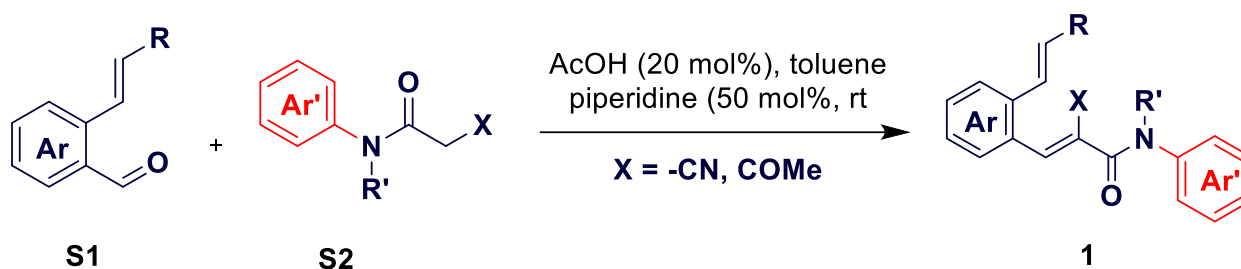

A reaction tube was charged with (*E*)-1-Formyl-2-(2-aryl-(alkene) alkenyl) benzene (**S1**) (1.0 equiv), **S2** derivatives (1.2 equiv), acetic acid (20 mol%) and piperidine (20 mol%), in 3.0 mL of toluene. The reaction suspension was stirred at room temperature and progress of reaction was monitored by TLC. Upon completion water was added to quench the reaction mixture and then extracted with the ethyl acetate (3 × 20 mL). Finally combined organic layer was dried over sodium sulphate, filtered and concentrated in vacuum. The residue was purified by column chromatography on silica gel to afford the corresponding **1** derivative.

### 3. CONTROL STUDIES

#### a) Light On-Off Experiment

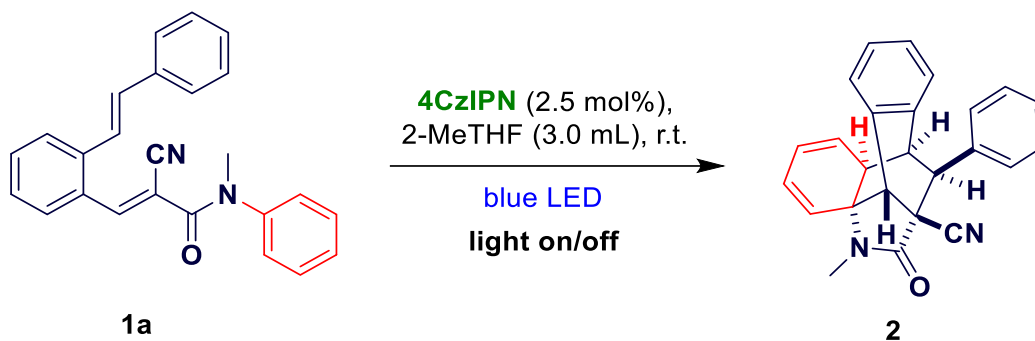

A light on/off experiment was performed separately by using the model reaction of **1a** irradiated under the standard catalytic system respectively. The reaction proceeded over a period of time under alternating cycles of irradiation and darkness (0-240 minutes for product **2**), and the progress was monitored by TLC analysis. As shown in Figure S1, cyclization product **2** was only formed under irradiation with blue LED.

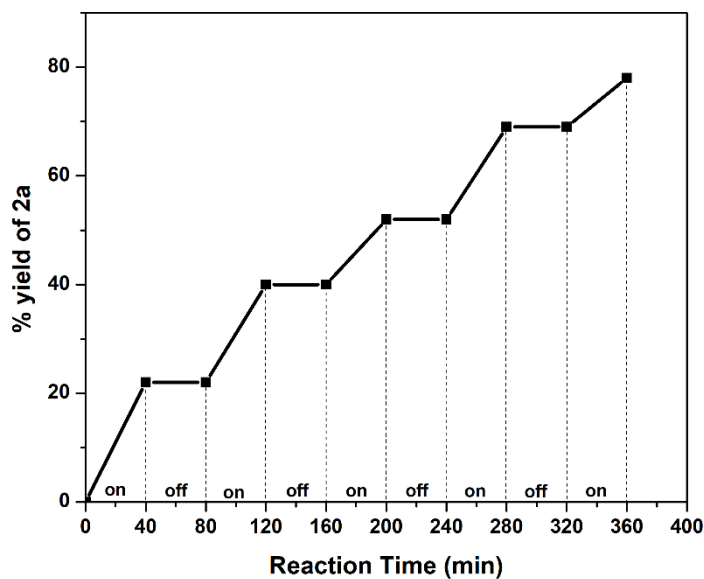

**Figure S1.** Visible-light Irradiation ON/OFF Experiments for product **2** respectively.

#### b. Fluorescence Quenching Study

A solution of 4CzIPN in acetonitrile at 25 °C was excited at 320 nm and the intensity of emission spectrum was measured at 480 nm (emission maximum). The fluorescence quenching experiments demonstrated that substrates **1a** efficiently quenches the excited state of the 4CzIPN photocatalyst under the standard reaction conditions respectively (Figure S2).

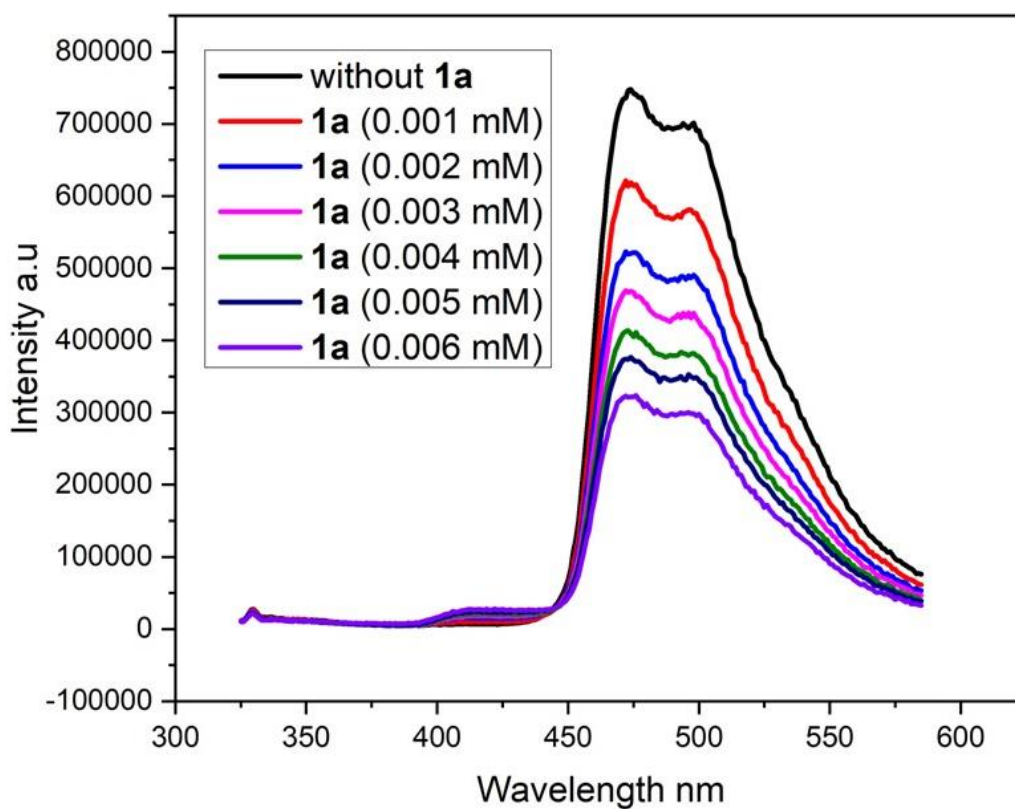

**Figure S2.** Fluorescence quenching of 4CzIPN (0.05 mM) of **1a** in acetonitrile.

#### 4. Evaluation of Green Metrics of the Process.

Atom economy defined as “how much of the reactants remain in the final desired product”

$$\text{Atom economy (AE)} = \frac{\text{Molecular mass of desired product}}{\text{Molecular mass of all reactants}} \times 100$$

Reaction mass efficiency (RME) defined as “the percentage of the mass of the reactants that remain in the product”

$$\text{Reaction mass efficiency (RME)} = \frac{\text{mass of desired product}}{\text{mass of all reactants}} \times 100$$

#### Evaluation of Green metrics for the current process

##### Reaction Scheme

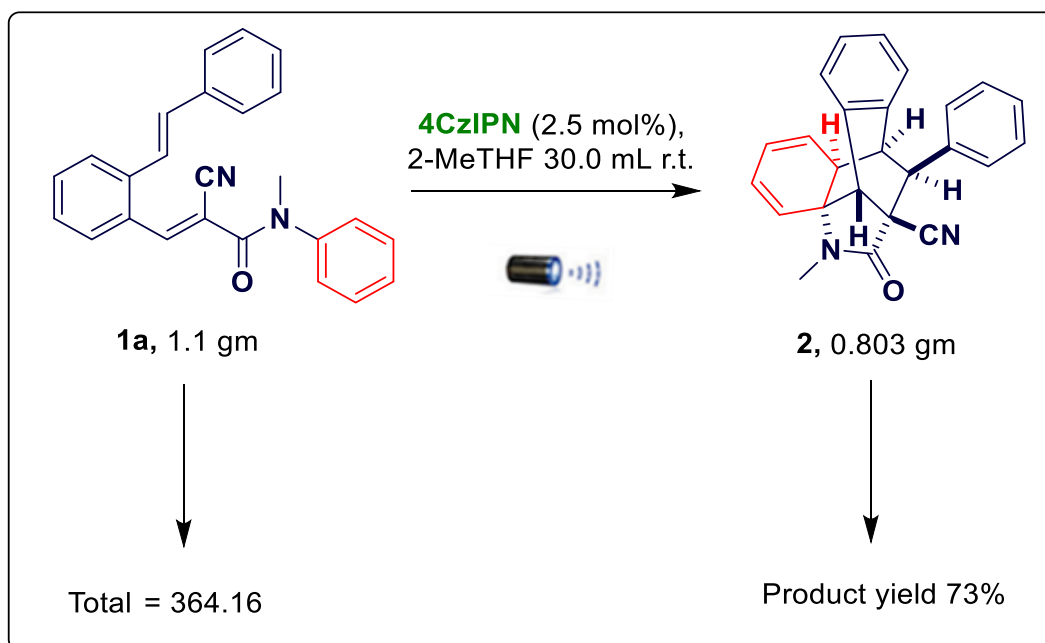

|            |                                                                                                                                         |           |                |              |
|------------|-----------------------------------------------------------------------------------------------------------------------------------------|-----------|----------------|--------------|
| Reactant 1 | (( <i>E</i> )-2-cyano-N-methyl-N-phenyl-3-(2-(( <i>E</i> )-styryl)phenyl)acrylamide ( <b>1a</b> ))                                      | 1.1 gm    | 0.003021 mol   | FW<br>364.16 |
| Auxiliary  | 4CzIPN                                                                                                                                  | 0.0596 gm | 0.00000755 mol | 788.89       |
| Product    | 3-methyl-2-oxo-13-phenyl-2,3,8,12 <i>b</i> -tetrahydro-1,8-methanodibenzo[ <i>e,h</i> ]indole-1(7 <i>aH</i> )-carbonitrile ( <b>2</b> ) | 0.803 gm  | 0.002205 mol   | FW<br>364.16 |

|                          |   |                                                                       |                                 |
|--------------------------|---|-----------------------------------------------------------------------|---------------------------------|
| E-factor                 | = | $\frac{1.1 \text{ gm} + 0.0596 \text{ gm} - 0.803 \text{ gm}}{0.803}$ | = 0.444 kg waste / 1 kg product |
| Atom economy             | = | $\frac{364.16}{364.16} \times 100$                                    | = 100%                          |
| Atom efficiency          | = | $\frac{73 \times 100}{100}$                                           | = 73%                           |
| Carbon efficiency        | = | $\frac{25}{25}$                                                       | = 100%                          |
| Reaction mass efficiency | = | $\frac{0.803 \text{ gm}}{1.1 \text{ gm}} \times 100$                  | = 73%                           |

## 5. Computational Methods

The DFT calculations were done by using the Gaussian 16 package.<sup>2</sup> The M06-2X functional<sup>3</sup> in combination with the double-zeta quality basis sets Def2-SVP was adopted for geometry optimization and vibrational frequency calculations. Additional single-point-energy calculations with the triple-zeta quality basis sets Def2-TZVP were performed to provide more accurate electronic energies. All the calculations include the solvent effect (solvent = N,N-dimethylacetamide) treated by the SMD solvation model.<sup>4</sup> The open-shell singlet diradical states involved in the reaction mechanism were tackled by the broken-symmetry approach. The free energies were evaluated at the standard conditions of 1 atm and 298.15 K. The values of spin density were provided by the natural population analysis (NPA).

|   |             |             |             |
|---|-------------|-------------|-------------|
|   | 48          |             |             |
|   | 1a-singlet  |             |             |
| O | 10.45060900 | 5.02438900  | 3.24119800  |
| N | 10.24144700 | 6.83693500  | 1.89644200  |
| N | 7.42451000  | 3.18433100  | 2.74029300  |
| C | 9.74120400  | 5.79249400  | 2.61960700  |
| C | 8.24072800  | 5.64455500  | 2.70757500  |
| C | 7.40576500  | 6.68917900  | 2.87415900  |
| H | 7.85106200  | 7.68690100  | 2.80502600  |
| C | 9.52750800  | 7.48456300  | 0.84445400  |
| C | 8.88320200  | 6.73245900  | -0.14249700 |
| H | 8.93820700  | 5.64239000  | -0.11020300 |
| C | 8.17248700  | 7.37664900  | -1.15440400 |
| H | 7.66553600  | 6.78342300  | -1.91740300 |
| C | 8.12251000  | 8.77038700  | -1.20130200 |
| H | 7.57181600  | 9.27257900  | -1.99828600 |
| C | 8.78580400  | 9.51980100  | -0.22766400 |
| H | 8.75252100  | 10.61022900 | -0.25803200 |
| C | 9.48315800  | 8.88155700  | 0.79643900  |
| H | 9.98586300  | 9.46213500  | 1.57256300  |
| C | 5.86908800  | 4.98144200  | 4.93508500  |
| H | 5.44201600  | 3.98481200  | 5.08964900  |
| C | 5.22548500  | 5.79559100  | 3.88576900  |
| C | 3.82580800  | 5.75756900  | 3.78312400  |
| H | 3.27239900  | 5.08300600  | 4.43999700  |
| C | 3.13831700  | 6.57762000  | 2.89375100  |
| H | 2.04910100  | 6.53189200  | 2.84391400  |
| C | 3.84265700  | 7.46886200  | 2.08242500  |
| H | 3.31280500  | 8.12726600  | 1.39249200  |
| C | 5.23126400  | 7.50687500  | 2.15155500  |
| H | 5.79267100  | 8.18511700  | 1.50396300  |
| C | 5.93819900  | 6.65368500  | 3.01544900  |
| C | 6.87465500  | 5.40688100  | 5.71628400  |
| H | 7.23588700  | 6.43553300  | 5.60689700  |
| C | 7.55620200  | 4.60142200  | 6.74213800  |
| C | 8.32161300  | 5.24798300  | 7.72569300  |
| H | 8.39984000  | 6.33756500  | 7.70797700  |

|   |             |            |            |
|---|-------------|------------|------------|
| C | 8.97096600  | 4.51847200 | 8.72024700 |
| H | 9.55720400  | 5.03903400 | 9.47979300 |
| C | 8.87415800  | 3.12685300 | 8.74246800 |
| H | 9.38486400  | 2.55308600 | 9.51788400 |
| C | 8.13038300  | 2.47013000 | 7.75840300 |
| H | 8.06505500  | 1.38047400 | 7.75988600 |
| C | 7.48108900  | 3.19774900 | 6.76491200 |
| H | 6.92894400  | 2.67144700 | 5.98352900 |
| C | 7.78277600  | 4.28315000 | 2.73393600 |
| C | 11.67940700 | 7.06816500 | 1.99777800 |
| H | 11.90629200 | 8.07570100 | 1.63344400 |
| H | 12.23904000 | 6.33353900 | 1.39778400 |
| H | 11.99388500 | 6.97811900 | 3.04381600 |

48

TS1-singlet

|   |             |             |             |
|---|-------------|-------------|-------------|
| O | 10.41756800 | 4.52828100  | 3.33950800  |
| N | 9.78561900  | 6.53796300  | 2.54240400  |
| N | 8.14267500  | 2.11198900  | 3.26286900  |
| C | 9.53039900  | 5.25147900  | 2.92054800  |
| C | 8.11548600  | 4.68698400  | 2.88702000  |
| C | 7.02207400  | 5.05756400  | 2.04010200  |
| H | 6.77473300  | 4.34225200  | 1.24699900  |
| C | 8.91525200  | 7.37685700  | 1.77821600  |
| C | 8.76687700  | 7.16023200  | 0.40592300  |
| H | 9.28741800  | 6.32181000  | -0.06158100 |
| C | 7.95123100  | 8.00664200  | -0.34363300 |
| H | 7.82880800  | 7.83324000  | -1.41425800 |
| C | 7.29528600  | 9.07374200  | 0.27352400  |
| H | 6.65453700  | 9.73337600  | -0.31449400 |
| C | 7.45677400  | 9.29616000  | 1.64184200  |
| H | 6.94561100  | 10.12997400 | 2.12640600  |
| C | 8.27091000  | 8.45049600  | 2.39562400  |
| H | 8.40601000  | 8.61331000  | 3.46752800  |
| C | 6.33446900  | 6.05386100  | 4.71582300  |
| H | 5.70986600  | 5.92333400  | 5.60595800  |
| C | 5.70514600  | 6.53217000  | 3.55986500  |
| C | 4.48654300  | 7.28798400  | 3.68616900  |
| H | 4.19057900  | 7.60383400  | 4.68865300  |
| C | 3.73936600  | 7.64237200  | 2.60160800  |
| H | 2.84325800  | 8.25221000  | 2.72878600  |
| C | 4.10992200  | 7.19436800  | 1.29541800  |
| H | 3.49287800  | 7.46305300  | 0.43641900  |
| C | 5.21566700  | 6.41520400  | 1.13021100  |
| H | 5.48685200  | 6.04257600  | 0.14013000  |
| C | 6.07931400  | 6.07170400  | 2.23291900  |
| C | 7.68342200  | 5.66125400  | 4.77480000  |
| H | 8.38120100  | 6.40579200  | 4.39395900  |
| C | 8.19976000  | 4.83676500  | 5.88157000  |
| C | 9.50286600  | 5.03831300  | 6.36127200  |
| H | 10.12073700 | 5.82055400  | 5.91447100  |
| C | 9.99972400  | 4.25843500  | 7.40342900  |
| H | 11.01143700 | 4.42928000  | 7.77556600  |
| C | 9.20579300  | 3.25876100  | 7.96886600  |
| H | 9.59686800  | 2.64527700  | 8.78262300  |
| C | 7.91376000  | 3.03843000  | 7.48610100  |
| H | 7.29574300  | 2.24940500  | 7.91826100  |
| C | 7.41485000  | 3.81800300  | 6.44508800  |
| H | 6.41201200  | 3.63148700  | 6.05280500  |
| C | 8.19072900  | 3.24893900  | 3.05631300  |
| C | 11.15761900 | 7.01486200  | 2.69597400  |

|             |             |             |             |
|-------------|-------------|-------------|-------------|
| H           | 11.14102900 | 8.10779700  | 2.78278200  |
| H           | 11.77678000 | 6.73433000  | 1.82838200  |
| H           | 11.60055100 | 6.58128800  | 3.59923600  |
| 48          |             |             |             |
| A-singlet   |             |             |             |
| O           | 10.05950200 | 4.03534200  | 3.08618500  |
| N           | 9.93169800  | 6.23617900  | 2.60122900  |
| N           | 7.15868900  | 2.40378500  | 3.29194600  |
| C           | 9.37902900  | 5.02016400  | 2.88113400  |
| C           | 7.84055700  | 4.93916900  | 3.08108200  |
| C           | 7.00116900  | 5.45186800  | 1.92349000  |
| H           | 7.37626200  | 5.27819000  | 0.91408900  |
| C           | 9.24887100  | 7.35005600  | 2.00818800  |
| C           | 9.02979300  | 7.36635100  | 0.62764600  |
| H           | 9.35632400  | 6.51559200  | 0.02584100  |
| C           | 8.37862900  | 8.44880000  | 0.03921400  |
| H           | 8.19434500  | 8.45072300  | -1.03642300 |
| C           | 7.96390100  | 9.52568200  | 0.82466500  |
| H           | 7.44839500  | 10.37053200 | 0.36488200  |
| C           | 8.22287400  | 9.52845000  | 2.19595700  |
| H           | 7.91777700  | 10.37718000 | 2.81018000  |
| C           | 8.87526100  | 8.44720500  | 2.78788800  |
| H           | 9.09281800  | 8.44736500  | 3.85798900  |
| C           | 5.99281300  | 5.85157600  | 4.55958900  |
| H           | 5.58306900  | 5.93982400  | 5.56920400  |
| C           | 5.19255400  | 6.03841800  | 3.48697600  |
| C           | 3.77810700  | 6.37353000  | 3.61896400  |
| H           | 3.35312200  | 6.39756000  | 4.62483600  |
| C           | 3.03148600  | 6.67696200  | 2.53591500  |
| H           | 1.97957000  | 6.94480100  | 2.64888900  |
| C           | 3.61211600  | 6.66623300  | 1.19826400  |
| H           | 2.97874000  | 6.93322300  | 0.35033300  |
| C           | 4.90292100  | 6.32356100  | 0.99915200  |
| H           | 5.33429600  | 6.29844000  | -0.00407500 |
| C           | 5.75860400  | 5.94454800  | 2.11988600  |
| C           | 7.47971900  | 5.67622700  | 4.41406300  |
| H           | 7.89504700  | 6.69058800  | 4.29437100  |
| C           | 8.15544600  | 5.05045000  | 5.61609900  |
| C           | 9.42366100  | 5.49181200  | 6.01306400  |
| H           | 9.90347200  | 6.30639900  | 5.46319000  |
| C           | 10.07214600 | 4.90497700  | 7.09911300  |
| H           | 11.05893300 | 5.26212800  | 7.39924500  |
| C           | 9.45846200  | 3.86756700  | 7.80252600  |
| H           | 9.96377500  | 3.40898700  | 8.65443300  |
| C           | 8.19424600  | 3.42223800  | 7.41532900  |
| H           | 7.70680600  | 2.61343300  | 7.96265900  |
| C           | 7.54649000  | 4.01059900  | 6.32879500  |
| H           | 6.55623400  | 3.65701300  | 6.03095800  |
| C           | 7.50422800  | 3.50100100  | 3.20614600  |
| C           | 11.39049500 | 6.31440600  | 2.60699900  |
| H           | 11.68289100 | 7.35673500  | 2.78157000  |
| H           | 11.81411000 | 5.97697000  | 1.64732800  |
| H           | 11.78655700 | 5.68115500  | 3.40899200  |
| 48          |             |             |             |
| TS2-singlet |             |             |             |
| O           | 11.24397900 | 4.96192300  | 3.04214500  |
| N           | 10.07776200 | 6.53897200  | 1.86720200  |
| N           | 9.00522600  | 2.44830400  | 3.71008500  |
| C           | 10.20357200 | 5.48246400  | 2.70391400  |
| C           | 8.82072100  | 5.02257400  | 3.22830300  |

|   |             |            |             |
|---|-------------|------------|-------------|
| C | 7.79323700  | 5.19689100 | 2.12946300  |
| H | 8.01186100  | 4.65276800 | 1.20637400  |
| C | 8.80498500  | 7.18255900 | 1.71199100  |
| C | 8.27990100  | 7.35245300 | 0.38966600  |
| H | 8.67427000  | 6.72028200 | -0.40921900 |
| C | 7.26473500  | 8.23720100 | 0.16326400  |
| H | 6.82311400  | 8.32039200 | -0.83124700 |
| C | 6.81849500  | 9.11208400 | 1.21001800  |
| H | 6.04593300  | 9.85227200 | 0.99307300  |
| C | 7.41388700  | 9.07996200 | 2.43849900  |
| H | 7.13598500  | 9.80161700 | 3.21000600  |
| C | 8.38647900  | 8.07688800 | 2.75396000  |
| H | 9.09426100  | 8.27243500 | 3.56193300  |
| C | 7.35195000  | 6.83812300 | 4.26444900  |
| H | 7.21215700  | 7.59160800 | 5.04481900  |
| C | 6.24401700  | 6.45785200 | 3.50477200  |
| C | 4.96286500  | 7.07755300 | 3.63691600  |
| H | 4.79447900  | 7.75726800 | 4.47541800  |
| C | 3.96172000  | 6.80694600 | 2.74189600  |
| H | 2.97747300  | 7.26169500 | 2.86761800  |
| C | 4.19481500  | 5.93905500 | 1.63195000  |
| H | 3.38590900  | 5.74563400 | 0.92518100  |
| C | 5.42351900  | 5.36697800 | 1.44239000  |
| H | 5.61425600  | 4.71985000 | 0.58337900  |
| C | 6.48267900  | 5.58831800 | 2.38372800  |
| C | 8.48019600  | 5.86339900 | 4.52585900  |
| H | 9.38164000  | 6.43301400 | 4.79092300  |
| C | 8.15529200  | 5.01166300 | 5.74578200  |
| C | 9.04895600  | 4.99210400 | 6.82113200  |
| H | 9.96106000  | 5.59161000 | 6.77161600  |
| C | 8.78753300  | 4.21403000 | 7.95067700  |
| H | 9.49468600  | 4.21161800 | 8.78218900  |
| C | 7.62791600  | 3.44362300 | 8.01431200  |
| H | 7.42081700  | 2.83451700 | 8.89605000  |
| C | 6.73160700  | 3.45405600 | 6.94287700  |
| H | 5.82313600  | 2.85042100 | 6.98350200  |
| C | 6.99129100  | 4.23405500 | 5.81830900  |
| H | 6.28546800  | 4.23005900 | 4.98446800  |
| C | 8.93984100  | 3.58484500 | 3.52373300  |
| C | 11.25651400 | 7.21423800 | 1.34959500  |
| H | 11.14524600 | 7.39007000 | 0.27118200  |
| H | 12.12891400 | 6.57623200 | 1.52833100  |
| H | 11.40165500 | 8.18152300 | 1.85551800  |

48

# 2a-singlet

|   |             |             |             |
|---|-------------|-------------|-------------|
| O | 11.29198800 | 4.80257500  | 2.72854700  |
| N | 10.05951500 | 6.43853300  | 1.67580900  |
| N | 8.69915900  | 2.37115600  | 3.22527900  |
| C | 10.24883200 | 5.35262700  | 2.45783400  |
| C | 8.85362600  | 4.97035300  | 3.00880900  |
| C | 7.91822600  | 5.54469800  | 1.90779300  |
| H | 7.97354700  | 4.92589500  | 1.00275700  |
| C | 8.66454500  | 6.89554000  | 1.66009800  |
| C | 8.29181800  | 7.46252100  | 0.31863800  |
| H | 8.56465700  | 6.85560800  | -0.54924900 |
| C | 7.60966900  | 8.60630100  | 0.18269300  |
| H | 7.32147800  | 8.95176700  | -0.81230900 |
| C | 7.23397800  | 9.42528700  | 1.34319000  |
| H | 6.66043700  | 10.33808200 | 1.17212400  |
| C | 7.60567500  | 9.07672500  | 2.58084200  |

|   |             |            |            |
|---|-------------|------------|------------|
| H | 7.34626100  | 9.70493200 | 3.43821600 |
| C | 8.41336100  | 7.84496200 | 2.87939900 |
| H | 9.39916100  | 8.17988400 | 3.24696700 |
| C | 7.75797900  | 7.02042100 | 4.02276800 |
| H | 7.66407000  | 7.63889700 | 4.92550500 |
| C | 6.42067500  | 6.54461200 | 3.53297000 |
| C | 5.17843600  | 6.80728900 | 4.10339100 |
| H | 5.10755800  | 7.42663200 | 5.00051200 |
| C | 4.03032600  | 6.25941900 | 3.52362100 |
| H | 3.05244700  | 6.45587700 | 3.96720900 |
| C | 4.12628300  | 5.45965000 | 2.38271300 |
| H | 3.22412500  | 5.03499000 | 1.93886600 |
| C | 5.37255700  | 5.20109400 | 1.80498800 |
| H | 5.45428400  | 4.57622300 | 0.91292600 |
| C | 6.51553100  | 5.74757500 | 2.38425800 |
| C | 8.64801400  | 5.78241400 | 4.34964500 |
| H | 9.63526300  | 6.16606200 | 4.64492300 |
| C | 8.11382700  | 5.00729200 | 5.53746700 |
| C | 8.74564500  | 5.17163900 | 6.77662900 |
| H | 9.62863700  | 5.81184000 | 6.84381600 |
| C | 8.26581200  | 4.53268400 | 7.92016400 |
| H | 8.77565000  | 4.67546100 | 8.87469000 |
| C | 7.14202800  | 3.71144700 | 7.84029800 |
| H | 6.76454200  | 3.20678700 | 8.73148100 |
| C | 6.50483700  | 3.53537100 | 6.61122700 |
| H | 5.62630600  | 2.89184300 | 6.53731300 |
| C | 6.98348800  | 4.17787500 | 5.46977300 |
| H | 6.46759000  | 4.02218800 | 4.52002400 |
| C | 8.76500500  | 3.52037200 | 3.14897400 |
| C | 11.14468300 | 7.25484200 | 1.18308300 |
| H | 11.11670200 | 8.25587700 | 1.64264100 |
| H | 11.08903400 | 7.36622500 | 0.09123300 |
| H | 12.08873100 | 6.76365800 | 1.44745400 |

48

1a-triplet

|   |            |             |             |
|---|------------|-------------|-------------|
| O | 9.54383700 | 3.86908900  | 3.18301900  |
| N | 9.69396200 | 6.09609500  | 2.75975400  |
| N | 6.72034000 | 2.45529900  | 1.81106400  |
| C | 9.05866800 | 4.88750200  | 2.71791300  |
| C | 7.68152000 | 4.82826900  | 2.12621300  |
| C | 6.78493500 | 5.91325800  | 1.69357200  |
| H | 6.98593800 | 6.32922500  | 0.70113200  |
| C | 9.35181000 | 7.17957300  | 1.89350700  |
| C | 9.55261300 | 7.05322500  | 0.51627700  |
| H | 9.96591200 | 6.12301100  | 0.11978000  |
| C | 9.20031700 | 8.10128200  | -0.33360300 |
| H | 9.34349200 | 7.99723800  | -1.41049300 |
| C | 8.66894000 | 9.27943700  | 0.19307100  |
| H | 8.39157000 | 10.09846300 | -0.47266700 |
| C | 8.50037800 | 9.41463900  | 1.57321800  |
| H | 8.09120300 | 10.33771600 | 1.98703400  |
| C | 8.84545400 | 8.36836400  | 2.42636900  |
| H | 8.70847300 | 8.45659900  | 3.50637100  |
| C | 5.91493800 | 5.16596900  | 4.54108800  |
| H | 5.49744900 | 4.34380700  | 5.13240000  |
| C | 5.03824200 | 5.75757900  | 3.52447900  |
| C | 3.68097800 | 5.92049600  | 3.83655700  |
| H | 3.31215100 | 5.51252100  | 4.78037600  |
| C | 2.82008400 | 6.63249700  | 3.00734800  |
| H | 1.77390400 | 6.76193500  | 3.28843300  |

|   |             |            |            |
|---|-------------|------------|------------|
| C | 3.31139500  | 7.20153900 | 1.82184400 |
| H | 2.64918200  | 7.77953400 | 1.17508800 |
| C | 4.62927300  | 7.00385200 | 1.45707300 |
| H | 5.00215000  | 7.40310200 | 0.51126700 |
| C | 5.52070000  | 6.23623300 | 2.26139400 |
| C | 7.13093100  | 5.66472400 | 4.84136900 |
| H | 7.46997600  | 6.56086300 | 4.31032300 |
| C | 8.05974500  | 5.15157200 | 5.85406500 |
| C | 9.13067100  | 5.96460200 | 6.25712600 |
| H | 9.24066700  | 6.95692000 | 5.81205800 |
| C | 10.04387600 | 5.52125300 | 7.21269700 |
| H | 10.86940800 | 6.16745200 | 7.51694000 |
| C | 9.90386800  | 4.25185500 | 7.77400100 |
| H | 10.61932100 | 3.89914500 | 8.51901000 |
| C | 8.84719800  | 3.42878000 | 7.37227900 |
| H | 8.74120600  | 2.43012000 | 7.80000200 |
| C | 7.93536500  | 3.87037900 | 6.41879800 |
| H | 7.12984400  | 3.20854300 | 6.09416100 |
| C | 7.18795100  | 3.50776000 | 1.95848700 |
| C | 11.00450800 | 6.15674700 | 3.39472200 |
| H | 11.15799400 | 7.16439400 | 3.80187000 |
| H | 11.80490800 | 5.94148300 | 2.66738300 |
| H | 11.04876100 | 5.42005600 | 4.20383400 |

48

TS1-triplet

|   |            |             |             |
|---|------------|-------------|-------------|
| O | 9.76141100 | 3.92667200  | 3.25380200  |
| N | 9.84496800 | 6.13278500  | 2.75952900  |
| N | 6.67936600 | 2.53657900  | 3.02562700  |
| C | 9.18608700 | 4.93490000  | 2.87250900  |
| C | 7.69923800 | 4.89524300  | 2.68706800  |
| C | 6.86125000 | 5.80639400  | 1.89715000  |
| H | 7.22613000 | 6.14912400  | 0.92857400  |
| C | 9.38277000 | 7.23756400  | 1.97766500  |
| C | 9.51120100 | 7.19811900  | 0.58612500  |
| H | 9.94854300 | 6.31443400  | 0.11623600  |
| C | 9.05145400 | 8.26536300  | -0.18395700 |
| H | 9.13667400 | 8.22628000  | -1.27126900 |
| C | 8.48038200 | 9.37903900  | 0.43527900  |
| H | 8.11488600 | 10.21149800 | -0.16845900 |
| C | 8.38803300 | 9.43315300  | 1.82703200  |
| H | 7.95472500 | 10.30840900 | 2.31384200  |
| C | 8.84811300 | 8.36801800  | 2.60091800  |
| H | 8.78722000 | 8.40166800  | 3.69082900  |
| C | 5.78345600 | 5.42031300  | 4.62592600  |
| H | 5.32165800 | 4.79565400  | 5.39629800  |
| C | 4.95469300 | 5.87052600  | 3.53455100  |
| C | 3.57320900 | 6.05271400  | 3.72633000  |
| H | 3.14184700 | 5.79078500  | 4.69504200  |
| C | 2.77623300 | 6.60303400  | 2.73202700  |
| H | 1.71062800 | 6.75691400  | 2.90759600  |
| C | 3.35154200 | 6.97736900  | 1.50374000  |
| H | 2.73025200 | 7.42566700  | 0.72646800  |
| C | 4.69551000 | 6.75668500  | 1.26598400  |
| H | 5.13213300 | 7.00873900  | 0.29692300  |
| C | 5.52940400 | 6.15776900  | 2.24834400  |
| C | 7.14112700 | 5.71943000  | 4.69049200  |
| H | 7.47191600 | 6.65309000  | 4.22697100  |
| C | 8.04706100 | 5.15396500  | 5.69445800  |
| C | 9.20875000 | 5.85997800  | 6.04842800  |
| H | 9.40310300 | 6.83119200  | 5.58642900  |

|   |             |            |            |
|---|-------------|------------|------------|
| C | 10.10160200 | 5.33302300 | 6.97858400 |
| H | 10.99730700 | 5.89433700 | 7.25085700 |
| C | 9.85189900  | 4.08743200 | 7.55820500 |
| H | 10.55283500 | 3.67165900 | 8.28429800 |
| C | 8.70655000  | 3.37085900 | 7.20238600 |
| H | 8.51513200  | 2.39226700 | 7.64616900 |
| C | 7.81149500  | 3.89548900 | 6.27396000 |
| H | 6.93179500  | 3.31802900 | 5.98113200 |
| C | 7.17592100  | 3.57010100 | 2.85857400 |
| C | 11.25254100 | 6.16171800 | 3.13671400 |
| H | 11.51487800 | 7.18449900 | 3.43664100 |
| H | 11.90299200 | 5.85823400 | 2.29932700 |
| H | 11.41608400 | 5.47728100 | 3.97664600 |

48

A-triplet

|   |             |             |             |
|---|-------------|-------------|-------------|
| O | 10.15977100 | 4.05546500  | 3.12912800  |
| N | 9.93007700  | 6.22810800  | 2.55014300  |
| N | 7.28584600  | 2.33012800  | 3.37155400  |
| C | 9.43801600  | 5.00368300  | 2.89541400  |
| C | 7.90274700  | 4.87288500  | 3.10431500  |
| C | 7.08112500  | 5.34400700  | 1.93505400  |
| H | 7.43023000  | 5.07649300  | 0.93813500  |
| C | 9.16792200  | 7.31268900  | 2.00105900  |
| C | 8.88902400  | 7.33712100  | 0.62987900  |
| H | 9.23180800  | 6.51201300  | 0.00225700  |
| C | 8.16216400  | 8.39350500  | 0.08608300  |
| H | 7.93297900  | 8.40054600  | -0.98087300 |
| C | 7.72878800  | 9.43887200  | 0.90501600  |
| H | 7.15332300  | 10.26297300 | 0.47996300  |
| C | 8.04747700  | 9.43785600  | 2.26282500  |
| H | 7.73102100  | 10.26402800 | 2.90153700  |
| C | 8.77876700  | 8.38293400  | 2.81063900  |
| H | 9.04969600  | 8.38564700  | 3.86840100  |
| C | 6.02742100  | 5.77275400  | 4.54800500  |
| H | 5.58285100  | 5.85061600  | 5.54138100  |
| C | 5.23279900  | 6.11189100  | 3.40132500  |
| C | 3.93365900  | 6.61601600  | 3.52299100  |
| H | 3.50642300  | 6.73806500  | 4.52076100  |
| C | 3.18744900  | 6.97555500  | 2.39042200  |
| H | 2.17784100  | 7.37143700  | 2.51201100  |
| C | 3.73467000  | 6.82881800  | 1.12049000  |
| H | 3.15969900  | 7.10980100  | 0.23672000  |
| C | 5.02630300  | 6.30336500  | 0.97232200  |
| H | 5.45061900  | 6.16306500  | -0.02461100 |
| C | 5.78543700  | 5.93332000  | 2.08954000  |
| C | 7.50633900  | 5.61605300  | 4.43837700  |
| H | 7.93312300  | 6.62561900  | 4.31487000  |
| C | 8.16513100  | 5.00079200  | 5.65521600  |
| C | 9.43048600  | 5.44480200  | 6.05833800  |
| H | 9.91820200  | 6.24919500  | 5.50009100  |
| C | 10.06557600 | 4.87504300  | 7.16113200  |
| H | 11.05016400 | 5.23429000  | 7.46592400  |
| C | 9.44073200  | 3.85164600  | 7.87518900  |
| H | 9.93520900  | 3.40613700  | 8.74032600  |
| C | 8.18002800  | 3.40251800  | 7.48074000  |
| H | 7.68522200  | 2.60322100  | 8.03542900  |
| C | 7.54612900  | 3.97340800  | 6.37681400  |
| H | 6.56017900  | 3.61507000  | 6.07106800  |
| C | 7.60708000  | 3.43336700  | 3.26326500  |
| C | 11.38228100 | 6.37615500  | 2.50125700  |

|             |             |             |             |
|-------------|-------------|-------------|-------------|
| H           | 11.63286500 | 7.42996300  | 2.67229100  |
| H           | 11.78329200 | 6.06537700  | 1.52316100  |
| H           | 11.83801900 | 5.75768600  | 3.28262700  |
| 48          |             |             |             |
| TS2-triplet |             |             |             |
| O           | 10.51847400 | 4.47328700  | 3.49599600  |
| N           | 9.89153300  | 6.32313900  | 2.30879400  |
| N           | 7.63614700  | 2.40716000  | 3.35190900  |
| C           | 9.66405100  | 5.20149900  | 3.04035700  |
| C           | 8.15373800  | 4.97821700  | 3.28256700  |
| C           | 7.42470200  | 5.55981400  | 2.09703000  |
| H           | 7.64043300  | 5.04444900  | 1.15747300  |
| C           | 8.82617100  | 7.13249300  | 1.76882900  |
| C           | 8.71365400  | 7.21810800  | 0.34363800  |
| H           | 9.18828000  | 6.44273200  | -0.26207200 |
| C           | 7.95571400  | 8.21369800  | -0.24119900 |
| H           | 7.83184400  | 8.22840000  | -1.32562900 |
| C           | 7.36529600  | 9.21814600  | 0.54503400  |
| H           | 6.76864500  | 10.00185400 | 0.07631300  |
| C           | 7.59751100  | 9.23826800  | 1.92649300  |
| H           | 7.20458800  | 10.05639700 | 2.53316600  |
| C           | 8.36505800  | 8.25318200  | 2.52707200  |
| H           | 8.60524000  | 8.31587900  | 3.58973900  |
| C           | 6.32788600  | 6.05491400  | 4.69344300  |
| H           | 5.89363700  | 6.24808400  | 5.67614000  |
| C           | 5.55496300  | 6.35374200  | 3.53696600  |
| C           | 4.25520900  | 6.89281500  | 3.64209000  |
| H           | 3.84493800  | 7.08527700  | 4.63587100  |
| C           | 3.50343500  | 7.18065900  | 2.50461900  |
| H           | 2.50339500  | 7.60491800  | 2.61002100  |
| C           | 4.02166900  | 6.91656500  | 1.23547900  |
| H           | 3.43023000  | 7.13035200  | 0.34391300  |
| C           | 5.30173300  | 6.36237100  | 1.10838800  |
| H           | 5.70580000  | 6.13635700  | 0.11896500  |
| C           | 6.07951300  | 6.08960200  | 2.23449600  |
| C           | 7.76926800  | 5.66700100  | 4.64663200  |
| H           | 8.36249900  | 6.59852100  | 4.66342400  |
| C           | 8.21264700  | 4.86781900  | 5.85874700  |
| C           | 9.45577000  | 5.11956600  | 6.44902600  |
| H           | 10.09722300 | 5.90089900  | 6.03496200  |
| C           | 9.87672500  | 4.38679400  | 7.55850300  |
| H           | 10.84737300 | 4.59745300  | 8.01117900  |
| C           | 9.05683400  | 3.39122100  | 8.09086700  |
| H           | 9.38396000  | 2.81867100  | 8.96074200  |
| C           | 7.81425900  | 3.13406800  | 7.50980800  |
| H           | 7.16609200  | 2.35894000  | 7.92272100  |
| C           | 7.39458700  | 3.86919500  | 6.40151100  |
| H           | 6.42003900  | 3.66481000  | 5.95071700  |
| C           | 7.88901200  | 3.53323400  | 3.33887900  |
| C           | 11.25138600 | 6.78860500  | 2.08676100  |
| H           | 11.38274600 | 7.79187200  | 2.51859100  |
| H           | 11.47034400 | 6.83470700  | 1.01027600  |
| H           | 11.94175500 | 6.08824100  | 2.56874700  |
| 48          |             |             |             |
| B-triplet   |             |             |             |
| O           | 10.56573300 | 4.62273100  | 3.59078900  |
| N           | 9.78907600  | 6.33983200  | 2.27735500  |
| N           | 7.57639800  | 2.49331200  | 3.31003700  |
| C           | 9.66929900  | 5.26888800  | 3.09497700  |
| C           | 8.16231200  | 5.04466600  | 3.34363800  |

|   |             |             |             |
|---|-------------|-------------|-------------|
| C | 7.51984200  | 5.75033000  | 2.13197900  |
| H | 7.58002700  | 5.04974000  | 1.28611200  |
| C | 8.53135200  | 6.91297000  | 1.77008600  |
| C | 8.58164400  | 7.06281900  | 0.27310000  |
| H | 8.89659000  | 6.17635800  | -0.28404800 |
| C | 8.21974500  | 8.20655800  | -0.37401000 |
| H | 8.24496900  | 8.23581000  | -1.46521500 |
| C | 7.82217100  | 9.36304300  | 0.34506100  |
| H | 7.53252400  | 10.26932800 | -0.18633800 |
| C | 7.85212100  | 9.34200500  | 1.76296900  |
| H | 7.60124800  | 10.24936900 | 2.31623200  |
| C | 8.20617400  | 8.21863400  | 2.45054200  |
| H | 8.24819600  | 8.24095000  | 3.54137300  |
| C | 6.32096400  | 6.03612900  | 4.76527700  |
| H | 5.86393800  | 6.17189900  | 5.74720500  |
| C | 5.54527900  | 6.31262500  | 3.61350600  |
| C | 4.19253700  | 6.73168600  | 3.73615400  |
| H | 3.76704000  | 6.83460800  | 4.73672700  |
| C | 3.42733200  | 7.00971600  | 2.61624900  |
| H | 2.39207900  | 7.33538100  | 2.73276500  |
| C | 3.97653000  | 6.86562800  | 1.33436600  |
| H | 3.37229500  | 7.07458100  | 0.45040000  |
| C | 5.29987900  | 6.44117600  | 1.19136000  |
| H | 5.72576300  | 6.31092200  | 0.19341600  |
| C | 6.09127400  | 6.17382400  | 2.30589800  |
| C | 7.77382700  | 5.68542800  | 4.72445700  |
| H | 8.35392500  | 6.62423100  | 4.78235300  |
| C | 8.21660700  | 4.84823600  | 5.91234600  |
| C | 9.44910900  | 5.09741700  | 6.52580400  |
| H | 10.08331800 | 5.90165100  | 6.14656300  |
| C | 9.86979600  | 4.33171800  | 7.61265700  |
| H | 10.83215300 | 4.54099400  | 8.08333900  |
| C | 9.06091400  | 3.30404000  | 8.09919900  |
| H | 9.38828100  | 2.70494600  | 8.95093200  |
| C | 7.82891500  | 3.04922000  | 7.49554600  |
| H | 7.18873800  | 2.24949900  | 7.87250800  |
| C | 7.40886700  | 3.81811700  | 6.41028700  |
| H | 6.44178900  | 3.61483500  | 5.94339800  |
| C | 7.84489900  | 3.61508200  | 3.33169300  |
| C | 11.06399300 | 6.94549900  | 1.96536000  |
| H | 11.05028500 | 8.01411900  | 2.22817100  |
| H | 11.29750600 | 6.84692600  | 0.89492200  |
| H | 11.83874800 | 6.43652200  | 2.55050000  |

48

TS3-triplet

|   |             |             |             |
|---|-------------|-------------|-------------|
| O | 11.27115700 | 4.91258100  | 2.96815500  |
| N | 10.06083600 | 6.44513800  | 1.74971400  |
| N | 8.68297600  | 2.43376500  | 3.34880200  |
| C | 10.23079100 | 5.42426900  | 2.62258900  |
| C | 8.82232100  | 5.03680400  | 3.14863100  |
| C | 7.91625200  | 5.57835700  | 2.02248400  |
| H | 8.01118400  | 4.93575100  | 1.13739300  |
| C | 8.67566300  | 6.92774900  | 1.68949500  |
| C | 8.24157800  | 7.35546300  | 0.32531900  |
| H | 8.51047900  | 6.69773400  | -0.50379500 |
| C | 7.34415500  | 8.43225100  | 0.13308100  |
| H | 6.90758000  | 8.58219000  | -0.85621600 |
| C | 7.03944400  | 9.28343600  | 1.16290000  |
| H | 6.34482800  | 10.11184300 | 1.01884000  |
| C | 7.74857200  | 9.15133100  | 2.43347200  |

|   |             |            |            |
|---|-------------|------------|------------|
| H | 7.71618200  | 9.98054100 | 3.14321900 |
| C | 8.48073500  | 8.02177300 | 2.74423000 |
| H | 9.29913100  | 8.12660900 | 3.46305400 |
| C | 7.51537300  | 6.90989900 | 4.26283800 |
| H | 7.43223100  | 7.62712800 | 5.08441800 |
| C | 6.29423600  | 6.54184100 | 3.56973600 |
| C | 4.99880900  | 6.93806000 | 3.93195100 |
| H | 4.84634300  | 7.53501900 | 4.83365500 |
| C | 3.91549900  | 6.55061100 | 3.14418200 |
| H | 2.90507400  | 6.84951300 | 3.42982900 |
| C | 4.11150300  | 5.78116900 | 1.99303100 |
| H | 3.25622200  | 5.48281800 | 1.38453000 |
| C | 5.40338100  | 5.40724700 | 1.61121900 |
| H | 5.56893000  | 4.83364200 | 0.69619100 |
| C | 6.48872400  | 5.79365300 | 2.39271900 |
| C | 8.55624800  | 5.82181200 | 4.49237300 |
| H | 9.49924900  | 6.31308500 | 4.77307400 |
| C | 8.16089000  | 4.96099300 | 5.68304400 |
| C | 8.95828900  | 4.97847800 | 6.83264400 |
| H | 9.86596300  | 5.58650000 | 6.84545700 |
| C | 8.60743700  | 4.22928600 | 7.95705100 |
| H | 9.24266900  | 4.25462500 | 8.84438500 |
| C | 7.45147100  | 3.45069400 | 7.94436700 |
| H | 7.17485800  | 2.86325900 | 8.82171700 |
| C | 6.64914800  | 3.42484800 | 6.80118100 |
| H | 5.74389100  | 2.81529400 | 6.78181700 |
| C | 6.99833500  | 4.17507200 | 5.68022900 |
| H | 6.36373400  | 4.14032900 | 4.79153600 |
| C | 8.74611500  | 3.58376800 | 3.28173400 |
| C | 11.16051300 | 7.22450700 | 1.22913500 |
| H | 11.17226300 | 8.23109800 | 1.67724900 |
| H | 11.07959700 | 7.32406500 | 0.13770800 |
| H | 12.09514000 | 6.70809700 | 1.47763300 |

48

2a-triplet

|   |             |             |             |
|---|-------------|-------------|-------------|
| O | 11.28656500 | 4.76092100  | 2.73149200  |
| N | 10.08386100 | 6.43100700  | 1.70066000  |
| N | 8.65510700  | 2.36686800  | 3.20332300  |
| C | 10.25269800 | 5.33112500  | 2.46423200  |
| C | 8.85204100  | 4.96484500  | 3.00667000  |
| C | 7.92432800  | 5.55691400  | 1.90662000  |
| H | 7.97620000  | 4.94267400  | 0.99879900  |
| C | 8.69274700  | 6.90900600  | 1.66084100  |
| C | 8.36766300  | 7.49051200  | 0.33300400  |
| H | 8.72924500  | 6.94973600  | -0.54296100 |
| C | 7.49600800  | 8.64110600  | 0.17468000  |
| H | 7.16322200  | 8.90729400  | -0.82974400 |
| C | 7.12374300  | 9.37926300  | 1.24884900  |
| H | 6.47639400  | 10.24950700 | 1.12495700  |
| C | 7.56900500  | 9.03547000  | 2.58323100  |
| H | 7.23968000  | 9.63955100  | 3.43037600  |
| C | 8.42461900  | 7.85145600  | 2.88174100  |
| H | 9.41366900  | 8.19311500  | 3.23861000  |
| C | 7.78084300  | 7.01709300  | 4.03017800  |
| H | 7.69364000  | 7.63423300  | 4.93451300  |
| C | 6.43760400  | 6.55534100  | 3.54032000  |
| C | 5.19728400  | 6.82485800  | 4.11266500  |
| H | 5.13220400  | 7.43541300  | 5.01627300  |
| C | 4.04402900  | 6.29728500  | 3.52489800  |
| H | 3.06775300  | 6.50010300  | 3.96915700  |

|   |             |            |            |
|---|-------------|------------|------------|
| C | 4.13231500  | 5.51045800 | 2.37397900 |
| H | 3.22581800  | 5.10203300 | 1.92379400 |
| C | 5.37608300  | 5.24412500 | 1.79513000 |
| H | 5.45208300  | 4.62905100 | 0.89577800 |
| C | 6.52484500  | 5.76924600 | 2.38371100 |
| C | 8.66091400  | 5.77169000 | 4.35044400 |
| H | 9.65271900  | 6.14617100 | 4.64256000 |
| C | 8.12448600  | 4.99895800 | 5.53883100 |
| C | 8.76289600  | 5.15416000 | 6.77584100 |
| H | 9.65268700  | 5.78511400 | 6.84079800 |
| C | 8.28108300  | 4.51786300 | 7.92001700 |
| H | 8.79615400  | 4.65351900 | 8.87277800 |
| C | 7.14859400  | 3.70833000 | 7.84313400 |
| H | 6.76947800  | 3.20585000 | 8.73485100 |
| C | 6.50474400  | 3.54137900 | 6.61625600 |
| H | 5.61927000  | 2.90717600 | 6.54457600 |
| C | 6.98524200  | 4.18149400 | 5.47423300 |
| H | 6.46377800  | 4.03351000 | 4.52632200 |
| C | 8.74100100  | 3.51541500 | 3.13639900 |
| C | 11.18520200 | 7.23034800 | 1.21526800 |
| H | 11.11354400 | 8.25705000 | 1.60787300 |
| H | 11.19383700 | 7.27223100 | 0.11712800 |
| H | 12.11907200 | 6.77413300 | 1.56491400 |

48

B-BS-singlet

|   |             |             |             |
|---|-------------|-------------|-------------|
| O | 10.55469700 | 4.59861400  | 3.57920600  |
| N | 9.78400600  | 6.31761500  | 2.26476600  |
| N | 7.54710600  | 2.49263900  | 3.32436900  |
| C | 9.66047700  | 5.25037700  | 3.08676800  |
| C | 8.15353000  | 5.03941600  | 3.34562100  |
| C | 7.50884200  | 5.74521600  | 2.13546800  |
| H | 7.56116400  | 5.04238700  | 1.29107300  |
| C | 8.52858300  | 6.90084400  | 1.76402100  |
| C | 8.56979600  | 7.04591300  | 0.26680800  |
| H | 8.87763700  | 6.15672800  | -0.28996300 |
| C | 8.20548700  | 8.18860300  | -0.38116300 |
| H | 8.22179400  | 8.21416900  | -1.47263300 |
| C | 7.81809700  | 9.34861900  | 0.33739700  |
| H | 7.52630300  | 10.25400100 | -0.19437400 |
| C | 7.86232300  | 9.33272600  | 1.75509300  |
| H | 7.62124500  | 10.24332100 | 2.30740100  |
| C | 8.21874700  | 8.21043500  | 2.44318300  |
| H | 8.27196100  | 8.23654900  | 3.53340100  |
| C | 6.33086000  | 6.05595600  | 4.77455300  |
| H | 5.88238200  | 6.20345200  | 5.75874900  |
| C | 5.54846400  | 6.32803400  | 3.62662400  |
| C | 4.19883000  | 6.75558000  | 3.75579700  |
| H | 3.78100000  | 6.86799300  | 4.75857700  |
| C | 3.42740600  | 7.02993800  | 2.63941500  |
| H | 2.39477400  | 7.36207100  | 2.76084000  |
| C | 3.96698200  | 6.87452900  | 1.35459100  |
| H | 3.35781900  | 7.08138200  | 0.47351800  |
| C | 5.28686500  | 6.44196100  | 1.20521800  |
| H | 5.70529700  | 6.30311700  | 0.20526100  |
| C | 6.08439500  | 6.17693400  | 2.31611200  |
| C | 7.77963800  | 5.68896000  | 4.72661200  |
| H | 8.37101000  | 6.62102700  | 4.77873500  |
| C | 8.21891800  | 4.85017400  | 5.91475900  |
| C | 9.45738100  | 5.08675400  | 6.52110700  |
| H | 10.09904400 | 5.88224600  | 6.13607400  |

|   |             |            |            |
|---|-------------|------------|------------|
| C | 9.87453400  | 4.31962500 | 7.60834200 |
| H | 10.84169100 | 4.51903100 | 8.07344200 |
| C | 9.05600500  | 3.30327700 | 8.10243900 |
| H | 9.38053500  | 2.70318600 | 8.95455600 |
| C | 7.81804000  | 3.06102100 | 7.50581300 |
| H | 7.17038400  | 2.27019300 | 7.88870400 |
| C | 7.40163200  | 3.83124300 | 6.42012500 |
| H | 6.42989700  | 3.63786300 | 5.95869300 |
| C | 7.82468300  | 3.61227400 | 3.34074800 |
| C | 11.06214700 | 6.91179000 | 1.94371000 |
| H | 11.06053600 | 7.98030100 | 2.20729100 |
| H | 11.28660800 | 6.81178900 | 0.87148300 |
| H | 11.83644400 | 6.39512400 | 2.52267400 |

48

TS3-BS-singlet

|   |             |            |             |
|---|-------------|------------|-------------|
| O | 11.03374100 | 4.86398100 | 3.34612000  |
| N | 10.03079600 | 6.44241100 | 2.00443500  |
| N | 8.21222000  | 2.54593100 | 3.51048400  |
| C | 10.05903200 | 5.42197200 | 2.89314000  |
| C | 8.59528900  | 5.12495400 | 3.28762100  |
| C | 7.81479400  | 5.67428900 | 2.08008600  |
| H | 7.96320700  | 4.99805000 | 1.22758400  |
| C | 8.69724700  | 6.98380700 | 1.73473600  |
| C | 8.44727500  | 7.27978300 | 0.28811800  |
| H | 8.89623200  | 6.60160200 | -0.44198900 |
| C | 7.56418900  | 8.24144600 | -0.07313700 |
| H | 7.29596500  | 8.36713800 | -1.12412900 |
| C | 7.00828300  | 9.14068800 | 0.90089200  |
| H | 6.29134500  | 9.89895700 | 0.58400200  |
| C | 7.51033900  | 9.14467000 | 2.20024500  |
| H | 7.23696600  | 9.95000100 | 2.88585300  |
| C | 8.39137300  | 8.15988000 | 2.62439100  |
| H | 8.97435400  | 8.28602100 | 3.53634700  |
| C | 7.06478700  | 6.79287500 | 4.48111000  |
| H | 6.86381800  | 7.45686800 | 5.32561000  |
| C | 6.03191300  | 6.56363200 | 3.53267500  |
| C | 4.69908000  | 7.00223900 | 3.72001300  |
| H | 4.43388300  | 7.52111900 | 4.64378300  |
| C | 3.73886900  | 6.74786300 | 2.75248000  |
| H | 2.70905300  | 7.07205400 | 2.91412600  |
| C | 4.07835000  | 6.07262600 | 1.56934100  |
| H | 3.31471500  | 5.87194000 | 0.81640200  |
| C | 5.39713100  | 5.68085800 | 1.34776400  |
| H | 5.67914700  | 5.18966200 | 0.41337900  |
| C | 6.37584700  | 5.92865500 | 2.31303100  |
| C | 8.27684400  | 5.91361000 | 4.62085300  |
| H | 9.14294300  | 6.56419800 | 4.81703300  |
| C | 8.18795400  | 4.99046700 | 5.83016200  |
| C | 9.36012500  | 4.64963100 | 6.51507500  |
| H | 10.31237200 | 5.07810000 | 6.19346900  |
| C | 9.31897800  | 3.76260900 | 7.59020700  |
| H | 10.24001500 | 3.50532400 | 8.11662100  |
| C | 8.10318200  | 3.20919200 | 7.99426400  |
| H | 8.06947600  | 2.51666400 | 8.83728000  |
| C | 6.93083300  | 3.54607800 | 7.31679300  |
| H | 5.97662000  | 3.11663900 | 7.62747100  |
| C | 6.97230600  | 4.43174300 | 6.23963800  |
| H | 6.05080800  | 4.68509600 | 5.70997000  |
| C | 8.38846500  | 3.68290000 | 3.42699300  |
| C | 11.22310500 | 7.14216500 | 1.58089000  |

|   |             |            |            |
|---|-------------|------------|------------|
| H | 11.23675000 | 8.16548800 | 1.98791100 |
| H | 11.27139800 | 7.19602900 | 0.48426800 |
| H | 12.09458200 | 6.59209500 | 1.95459200 |

## 6. SPECTRAL CHARACTERIZATION

**(E/Z)-2-cyano-N-methyl-N-phenyl-3-(2-((E)-styryl)phenyl)acrylamide (1a):** A reaction tube was charged

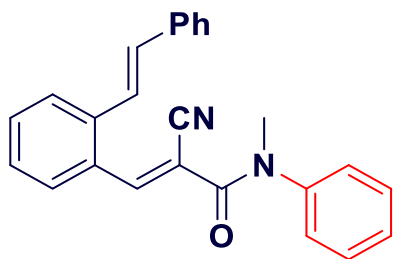

with respective styryl aldehyde (1.0 equiv), 2-cyano-N-methyl-N-phenylacetamide (1.5 equiv), AcOH (20 mol%) and piperidine (20 mol%) in 5.0 mL of toluene. The reaction suspension was stirred at room temperature, and the progress of the reaction was monitored by TLC. Upon completion, water was added to quench the reaction mixture, which was then extracted with ethyl

acetate (3×15 mL). Finally, the combined organic layer was dried over sodium sulfate, filtered, and concentrated under vacuum. The residue was purified by column chromatography on silica gel to afford the **1a** (10.9:1) as a mixture of E/Z isomers. **<sup>1</sup>H NMR** (400 MHz, CDCl<sub>3</sub>) δ 8.31 (s, 1H), 7.71 (d, *J* = 7.8 Hz, 1H), 7.61-7.52 (m, 3H), 7.47-7.25 (m, 11H), 7.19 (d, *J* = 16.0 Hz, 1H), 6.93 (d, *J* = 16.0 Hz, 1H), 6.62 (d, *J* = 6.8 Hz, 1H), 3.47 (s, 3H), 3.24 (s, 1H); **<sup>13</sup>C NMR** (100 MHz, CDCl<sub>3</sub>) δ 163.11, 151.71, 142.68, 138.48, 136.70, 134.37, 133.84, 131.43, 130.75, 130.32, 129.85, 129.12, 128.76, 128.69, 128.54, 128.38, 128.20, 127.86, 127.62, 127.20, 127.02, 126.89, 126.63, 125.94, 124.89, 124.62, 114.60, 109.68, 38.87. Yield: 94%, pale yellow solid, m.p. 109-111 °C; **HRMS-EI (m/z):** [M+Na]<sup>+</sup> calcd. for C<sub>25</sub>H<sub>20</sub>N<sub>2</sub>O 387.1473 found 387.1471.

**(E/Z)-2-cyano-N-methyl-N-phenyl-3-(6-((E)-styryl)benzo[d][1,3]dioxol-5-yl)acrylamide (1b):** A reaction

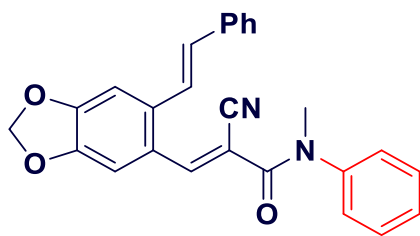

tube was charged with respective styryl aldehyde (1.0 equiv), 2-cyano-N-methyl-N-phenylacetamide (1.5 equiv), AcOH (20 mol%) and piperidine (20 mol%) in 5.0 mL of toluene. The reaction suspension was stirred at room temperature, and the progress of the reaction was monitored by TLC. Upon completion, water was added to quench the reaction mixture, which was then

extracted with ethyl acetate (3×15 mL). Finally, the combined organic layer was dried over sodium sulfate, filtered, and concentrated under vacuum. The residue was purified by column chromatography on silica gel to afford the **1b** as a mixture of E/Z isomers. **<sup>1</sup>H NMR** (400 MHz, CDCl<sub>3</sub>) δ 8.28 (s, 1H), 7.49 (dd, *J* = 16.2, 7.8 Hz, 4H), 7.41 (ddd, *J* = 7.2, 6.0, 2.5 Hz, 4H), 7.37-7.29 (m, 4H), 7.27-7.21 (m, 5H), 7.15 (d, *J* = 12.2 Hz, 1H), 7.05 (s, 1H), 6.94 (d, *J* = 5.8 Hz, 1H), 6.83 (d, *J* = 15.9 Hz, 1H), 6.40 (d, *J* = 16.0 Hz, 1H), 6.06 (s, 1H), 5.99 (d, *J* = 0.9 Hz, 2H), 3.45 (s, 3H), 3.31 (d, *J* = 4.7 Hz, 3H), 3.22 (s, 2H); **<sup>13</sup>C NMR** (101 MHz, CDCl<sub>3</sub>) δ 163.51, 150.88, 150.38, 147.36, 144.99, 142.83, 142.29, 136.59, 135.49, 133.40, 132.99, 130.40, 129.76, 129.12, 128.97, 128.72, 128.65, 128.26, 128.20, 128.00, 127.93, 126.96, 126.94, 126.77, 126.50, 126.00, 124.38, 124.29, 124.22, 115.06, 114.05, 108.12, 107.48, 106.68, 106.57, 101.90, 38.91, 37.84, 37.25, 33.85, 25.35. Yield: 87%, yellow solid, m.p. 151-153 °C; **HRMS-EI (m/z):** [M+Na]<sup>+</sup> calcd. for C<sub>26</sub>H<sub>20</sub>N<sub>2</sub>O<sub>3</sub> 431.1372 found 431.1368.

**(E/Z)-2-cyano-N-methyl-3-(5-methyl-2-((E)-styryl)phenyl)-N-phenylacrylamide (1d):** A reaction tube was

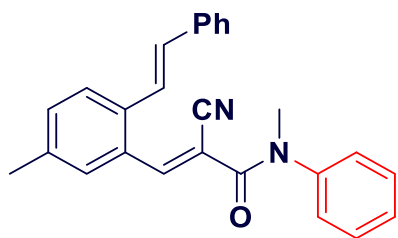

charged with respective styryl aldehyde (1.0 equiv), 2-cyano-*N*-methyl-*N*-phenylacetamide (1.5 equiv), AcOH (20 mol%) and piperidine (20 mol%) in 5.0 mL of toluene. The reaction suspension was stirred at room temperature, and the progress of the reaction was monitored by TLC. Upon completion, water was added to quench the reaction mixture, which was then extracted with

ethyl acetate (3×15 mL). Finally, the combined organic layer was dried over sodium sulfate, filtered, and concentrated under vacuum. The residue was purified by column chromatography on silica gel to afford the **1d** as a mixture of E/Z isomers (8:2). **<sup>1</sup>H NMR** (400 MHz, CDCl<sub>3</sub>) δ 8.30 (s, 1H), 7.69 (d, *J* = 8.1 Hz, 1H), 7.57-7.50 (m, 2H), 7.45-7.29 (m, 7H), 7.28-7.23 (m, 2H), 7.19 (d, *J* = 16.0 Hz, 1H), 7.09 (d, *J* = 8.0 Hz, 1H), 6.91 (d, *J* = 16.0 Hz, 1H), 3.46 (d, *J* = 2.2 Hz, 3H), 3.24 (d, *J* = 5.4 Hz, 1H), 2.38 (s, 3H), 2.32 (s, 1H); **<sup>13</sup>C NMR** (101 MHz, CDCl<sub>3</sub>) δ 163.38, 151.43, 142.82, 142.15, 138.67, 136.76, 134.15, 129.80, 128.73, 128.55, 128.46, 128.30, 128.07, 127.82, 127.64, 127.00, 126.86, 124.95, 114.92, 108.35, 38.88, 21.58; . Yield: 91%, yellow solid, m.p. 114-115 °C; **HRMS-EI (m/z):** [M+Na]<sup>+</sup> calcd. for C<sub>26</sub>H<sub>22</sub>N<sub>2</sub>O 401.1629 found 401.1629.

**(E/Z)-2-cyano-3-(5-fluoro-2-((E)-styryl)phenyl)-N-methyl-N-phenylacrylamide (1e):** A reaction tube was

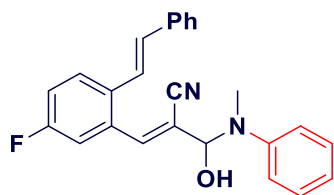

charged with respective styryl aldehyde (1.0 equiv), 2-cyano-*N*-methyl-*N*-phenylacetamide (1.5 equiv), AcOH (20 mol%) and piperidine (20 mol%) in 5.0 mL of toluene. The reaction suspension was stirred at room temperature, and the progress of the reaction was monitored by TLC. Upon completion, water was added to quench

the reaction mixture, which was then extracted with ethyl acetate (3×15 mL). Finally, the combined organic layer was dried over sodium sulfate, filtered, and concentrated under vacuum. The residue was purified by column chromatography on silica gel to afford the **1e** as a mixture of E/Z isomers (7:3). **<sup>1</sup>H NMR** (400 MHz, CDCl<sub>3</sub>) δ 8.29-8.21 (m, 1H), 7.74 (dd, *J* = 8.8, 5.7 Hz, 1H), 7.58-7.50 (m, 3H), 7.46-7.23 (m, 10H), 7.18 – 7.07 (m, 2H), 7.00-6.92 (m, 1H), 6.86 (d, *J* = 16.0 Hz, 1H), 6.69 (td, *J* = 8.8, 4.3 Hz, 1H), 6.32 (dd, *J* = 16.6, 10.1 Hz, 1H), 3.46 (s, 3H), 3.26 (d, *J* = 12.3 Hz, 1H); **<sup>13</sup>C NMR** (101 MHz, CDCl<sub>3</sub>) δ 165.56, 163.05, 162.92, 162.73, 162.59, 160.25, 150.31, 150.18, 150.15, 142.64, 142.47, 141.33, 141.24, 136.53, 136.18, 135.29, 134.75, 134.72, 134.28, 134.26, 131.79, 131.71, 130.85, 130.75, 129.90, 129.86, 129.26, 129.18, 129.09, 129.01, 128.80, 128.77, 128.70, 128.42, 128.37, 128.23, 128.02, 127.04, 127.00, 126.83, 126.78, 126.58, 126.51, 126.48, 125.91, 123.86, 123.68, 123.65, 123.56, 118.68, 118.47, 115.11, 115.02, 114.88, 114.80, 114.55, 113.99, 113.76, 113.54, 110.85, 109.38, 38.89, 38.86; Yield: 80%, light brown solid, m.p. 125-127 °C; **HRMS-EI (m/z):** [M+Na]<sup>+</sup> calcd. for C<sub>25</sub>H<sub>19</sub>FN<sub>2</sub>O 403.1565 found 403.1561.

**(E/Z)-2-cyano-3-(4-methoxy-2-((E)-styryl)phenyl)-N-methyl-N-phenylacrylamide (1g):** A reaction tube was charged with respective styryl aldehyde (1.0 equiv), 2-cyano-*N*-methyl-*N*-phenylacetamide (1.5 equiv), AcOH

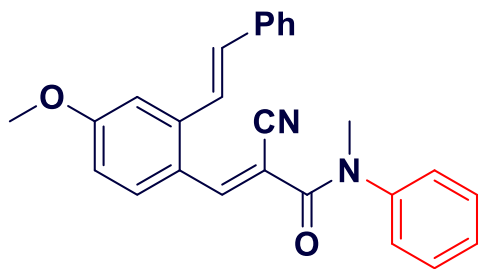

(20 mol%) and piperidine (20 mol%) in 5.0 mL of toluene. The reaction suspension was stirred at room temperature, and the progress of the reaction was monitored by TLC. Upon completion, water was added to quench the reaction mixture, which was then extracted with ethyl acetate (3×15 mL). Finally, the combined organic layer was dried over sodium

sulfate, filtered, and concentrated under vacuum. The residue was purified by column chromatography on silica gel to afford the **1g** as a mixture of E/Z isomers (2:1). **<sup>1</sup>H NMR** (400 MHz, CDCl<sub>3</sub>) δ 8.29 (s, 1H), 7.51 (dd, *J* = 8.1, 3.1 Hz, 3H), 7.44 – 7.24 (m, 11H), 7.21 – 7.10 (m, 2H), 7.03 – 6.93 (m, 2H), 6.82 (d, *J* = 16.0 Hz, 1H), 6.67 (d, *J* = 7.0 Hz, 1H), 6.20 (dd, *J* = 134.6, 16.1 Hz, 1H), 3.84 (s, 1H), 3.76 (s, 3H), 3.46 (s, 3H), 3.25 (s, 1H); **<sup>13</sup>C NMR** (100 MHz, CDCl<sub>3</sub>) δ 162.99, 162.26, 158.65, 151.22, 145.35, 142.64, 141.75, 136.92, 136.54, 132.42, 132.10, 131.97, 131.32, 131.03, 130.09, 129.77, 129.14, 128.65, 128.58, 128.42, 128.14, 127.96, 127.92, 127.90, 126.96, 126.62, 126.35, 125.95, 124.35, 124.23, 118.78, 117.99, 116.78, 114.64, 112.37, 112.04, 111.17, 109.45, 55.51, 55.38, 38.81, 37.10; Yield: 91%, yellow solid, m.p. 100-102 °C; **HRMS-EI (m/z):** [M+Na]<sup>+</sup> calcd. for C<sub>26</sub>H<sub>22</sub>N<sub>2</sub>O<sub>2</sub>Na 417.1578 found 417.1575.

**(E/Z)-2-cyano-3-(2-((E)-4-methoxystyryl)phenyl)-N-methyl-N-phenylacrylamide (1h):** A reaction tube was charged with respective styryl aldehyde (1.0 equiv), 2-cyano-*N*-methyl-*N*-phenylacetamide (1.5 equiv), AcOH (20 mol%) and piperidine (20 mol%) in 5.0

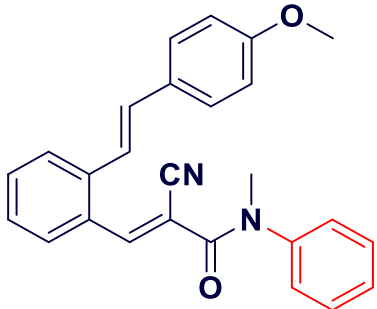

mL of toluene. The reaction suspension was stirred at room temperature, and the progress of the reaction was monitored by TLC. Upon completion, water was added to quench the reaction mixture, which was then extracted with ethyl acetate (3×15 mL). Finally, the combined organic layer was dried over sodium sulfate, filtered, and concentrated under vacuum. The residue was purified by column

chromatography on silica gel to afford the **1h** as a mixture of E/Z isomers (2:1). **<sup>1</sup>H NMR** (400 MHz, CDCl<sub>3</sub>) δ 8.31 (s, 1H), 7.69 (d, *J* = 7.8 Hz, 1H), 7.56 (d, *J* = 7.8 Hz, 1H), 7.51-7.33 (m, 8H), 7.30-7.20 (m, 6H), 7.15 (ddd, *J* = 8.5, 7.9, 6.0 Hz, 2H), 7.05 (d, *J* = 16.0 Hz, 1H), 6.96-6.83 (m, 4H), 6.61 (dd, *J* = 8.1, 1.3 Hz, 1H), 6.24 (d, *J* = 16.1 Hz, 1H), 6.09 (d, *J* = 16.1 Hz, 1H), 3.85 (s, 3H), 3.83 (d, *J* = 3.0 Hz, 2H), 3.47 (s, 3H), 3.23 (s, 2H); **<sup>13</sup>C NMR** (100 MHz, CDCl<sub>3</sub>) δ 163.17, 162.36, 159.84, 159.79, 151.79, 145.67, 142.72, 141.95, 138.84, 137.84, 133.91, 133.39, 132.55, 131.38, 131.04, 130.68, 130.07, 129.82, 129.72, 129.54, 129.14, 129.07, 128.86, 128.49, 128.20, 128.14, 127.94, 127.80, 127.19, 127.01, 126.98, 126.95, 126.84, 125.93, 122.64, 122.43, 116.98, 114.66, 114.38, 114.17, 114.10, 110.85, 109.41, 55.31, 38.83, 37.09; Yield: 94%, yellow solid, m.p. 141-143 °C; **HRMS-EI (m/z):** [M+Na]<sup>+</sup> calcd. for C<sub>26</sub>H<sub>22</sub>N<sub>2</sub>O<sub>2</sub>Na 417.1578 found 417.1575.

**(E/Z)-3-(2-((E)-4-chlorostyryl)phenyl)-2-cyano-N-methyl-N-phenylacrylamide (1j):** A reaction tube was

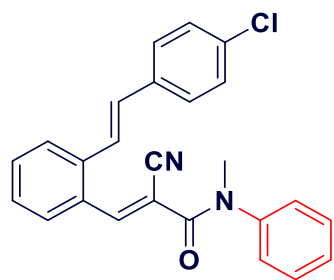

charged with respective styryl aldehyde (1.0 equiv), 2-cyano-N-methyl-N-phenylacetamide (1.5 equiv), AcOH (20 mol%) and piperidine (20 mol%) in 5.0 mL of toluene. The reaction suspension was stirred at room temperature, and the progress of the reaction was monitored by TLC. Upon completion, water was added to quench the reaction mixture, which was then extracted with ethyl acetate (3×15 mL). Finally, the combined organic layer was dried over sodium sulfate, filtered,

and concentrated under vacuum. The residue was purified by column chromatography on silica gel to afford the

**1j** as a mixture of E/Z isomers (2:1). **<sup>1</sup>H NMR** (400 MHz, CDCl<sub>3</sub>) δ 8.31 (s, 1H), 7.63 (dd, *J* = 16.4, 7.8 Hz, 2H), 7.43 (ddd, *J* = 10.1, 8.0, 4.4 Hz, 6H), 7.34 (ddd, *J* = 14.1, 6.8, 3.4 Hz, 5H), 7.23-7.07 (m, 4H), 6.87 (d, *J* = 16.1 Hz, 1H), 6.61 (d, *J* = 7.2 Hz, 1H), 6.35 (d, *J* = 16.1 Hz, 1H), 6.12 (d, *J* = 16.2 Hz, 1H), 3.47 (s, 3H), 3.23 (s, 1H); **<sup>13</sup>C NMR** (101 MHz, CDCl<sub>3</sub>) δ 162.99, 162.17, 151.57, 145.34, 142.61, 141.90, 138.05, 137.02, 135.16, 134.76, 133.97, 132.96, 132.30, 131.42, 131.29, 130.75, 130.33, 129.83, 129.06, 128.94, 128.90, 128.85, 128.57, 128.21, 128.04, 127.80, 127.75, 127.48, 127.18, 127.05, 126.99, 125.93, 125.43, 125.16, 116.84, 114.49, 111.29, 109.82, 38.85, 37.10; Yield: 85%, pale yellow solid, m.p. 121-123 °C; **HRMS-EI (m/z):** [M+Na]<sup>+</sup> calcd. for C<sub>25</sub>H<sub>19</sub>ClN<sub>2</sub>O 421.1084 found 421.1080.

**(E/Z)-2-cyano-N-methyl-3-(2-((E)-3-nitrostyryl)phenyl)-N-phenylacrylamide (1l):** A reaction tube was

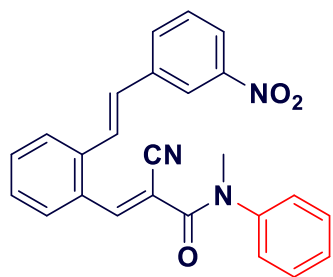

charged with respective styryl aldehyde (1.0 equiv), 2-cyano-N-methyl-N-phenylacetamide (1.5 equiv), AcOH (20 mol%) and piperidine (20 mol%) in 5.0 mL of toluene. The reaction suspension was stirred at room temperature, and the progress of the reaction was monitored by TLC. Upon completion, water was added to quench the reaction mixture, which was then extracted with ethyl acetate (3×15 mL). Finally, the combined organic layer was dried over sodium sulfate, filtered, and concentrated

under vacuum. The residue was purified by column chromatography on silica gel to afford the **1l** as a mixture of

E/Z isomers (3:1). **<sup>1</sup>H NMR** (400 MHz, CDCl<sub>3</sub>) δ 8.36 (s, 1H), 8.29 (s, 1H), 8.16 (ddd, *J* = 10.2, 5.1, 4.0 Hz, 2H), 7.85 (d, *J* = 7.8 Hz, 1H), 7.72 (d, *J* = 7.8 Hz, 1H), 7.57 (dt, *J* = 15.7, 7.8 Hz, 3H), 7.46 (dt, *J* = 15.0, 6.4 Hz, 4H), 7.41 – 7.15 (m, 7H), 6.96 (d, *J* = 16.1 Hz, 1H), 6.65 (d, *J* = 6.7 Hz, 1H), 6.46 (d, *J* = 16.1 Hz, 1H), 6.20 (d, *J* = 16.1 Hz, 1H), 3.48 (s, 3H), 3.24 (s, 1H); **<sup>13</sup>C NMR** (100 MHz, CDCl<sub>3</sub>) δ 162.86, 162.05, 151.29, 148.61, 145.09, 142.57, 142.00, 138.42, 138.05, 137.36, 136.34, 132.55, 132.23, 131.87, 131.62, 131.50, 131.00, 130.85, 130.62, 129.87, 129.72, 129.64, 129.20, 129.05, 128.69, 128.41, 128.30, 128.13, 128.07, 127.88, 127.85, 127.55, 127.33, 127.03, 126.03, 122.73, 122.67, 121.40, 121.16, 116.71, 114.41, 111.75, 110.19, 38.88, 37.14; Yield: 70%, yellow solid, m.p. 95-97 °C; **HRMS-EI (m/z):** [M+Na]<sup>+</sup> calcd. for C<sub>25</sub>H<sub>19</sub>N<sub>3</sub>O<sub>3</sub>Na 432.1323 found 432.1323.

**(E/Z)-2-cyano-N-methyl-3-(2-((E)-2-(naphthalen-2-yl)vinyl)phenyl)-N-phenylacrylamide (1m):** A reaction

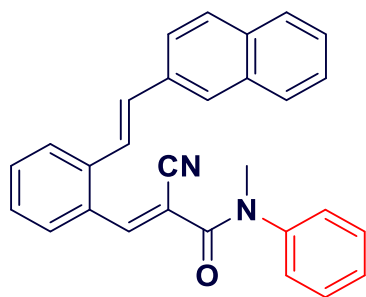

tube was charged with respective styryl aldehyde (1.0 equiv), 2-cyano-*N*-methyl-*N*-phenylacetamide (1.5 equiv), AcOH (20 mol%) and piperidine (20 mol%) in 5.0 mL of toluene. The reaction suspension was stirred at room temperature, and the progress of the reaction was monitored by TLC. Upon completion, water was added to quench the reaction mixture, which was then extracted with ethyl acetate (3×15 mL). Finally, the combined organic layer was dried over sodium sulfate,

filtered, and concentrated under vacuum. The residue was purified by column chromatography on silica gel to afford the **1m** as a mixture of E/Z isomers (3:1). **<sup>1</sup>H NMR** (400 MHz, CDCl<sub>3</sub>) δ 8.35 (s, 1H), 7.91-7.79 (m, 5H), 7.74 (dd, *J* = 12.0, 4.8 Hz, 2H), 7.68-7.60 (m, 1H), 7.54-7.38 (m, 7H), 7.38-7.23 (m, 6H), 7.18 (t, *J* = 7.5 Hz, 1H), 7.14-7.04 (m, 1H), 6.64 (d, *J* = 7.3 Hz, 1H), 6.42 (dd, *J* = 20.6, 16.1 Hz, 1H), 3.47 (s, 3H), 3.24 (s, 1H); **<sup>13</sup>C NMR** (101 MHz, CDCl<sub>3</sub>) δ 163.10, 151.61, 145.55, 142.69, 138.47, 137.39, 134.35, 134.16, 133.65, 133.51, 133.42, 133.30, 131.43, 131.32, 130.74, 130.34, 129.84, 129.11, 128.98, 128.57, 128.43, 128.38, 128.17, 128.12, 128.05, 127.88, 127.69, 127.63, 127.41, 127.30, 127.24, 127.14, 127.01, 126.49, 126.44, 126.32, 126.28, 125.96, 125.05, 124.79, 123.49, 123.15, 114.62, 109.76, 38.85, 37.11; Yield: 84%, pale yellow solid, m.p. 119-121 °C; **HRMS-EI (m/z):** (M)<sup>+</sup> calcd. for C<sub>29</sub>H<sub>22</sub>N<sub>2</sub>O 414.1732 found 414.1729.

**(E/Z)-2-cyano-3-(2-((E)-4-(methoxymethyl)styryl)phenyl)-N-methyl-N-phenylacrylamide (1n):** A reaction

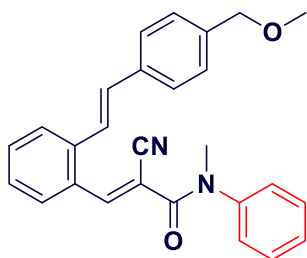

tube was charged with respective styryl aldehyde (1.0 equiv), 2-cyano-*N*-methyl-*N*-phenylacetamide (1.5 equiv), AcOH (20 mol%) and piperidine (20 mol%) in 5.0 mL of toluene. The reaction suspension was stirred at room temperature, and the progress of the reaction was monitored by TLC. Upon completion, water was added to quench the reaction mixture, which was then extracted with ethyl acetate (3×15 mL). Finally, the combined organic layer was dried over sodium sulfate, filtered, and concentrated

under vacuum. The residue was purified by column chromatography on silica gel to afford the **1n** as a mixture of E/Z isomers (2.9:1). **<sup>1</sup>H NMR** (400 MHz, CDCl<sub>3</sub>) δ 8.31 (s, 1H), 7.70 (d, *J* = 7.9 Hz, 1H), 7.59 (d, *J* = 7.8 Hz, 1H), 7.52 (d, *J* = 8.1 Hz, 2H), 7.48 – 7.25 (m, 12H), 7.24 – 7.10 (m, 3H), 6.93 (d, *J* = 16.0 Hz, 1H), 6.65 – 6.58 (m, 1H), 6.37 (d, *J* = 16.1 Hz, 1H), 6.15 (d, *J* = 16.2 Hz, 1H), 4.49 (s, 3H), 3.47 (s, 3H), 3.41 (d, *J* = 1.2 Hz, 3H), 3.24 (s, 1H); **<sup>13</sup>C NMR** (100 MHz, CDCl<sub>3</sub>) δ 163.10, 151.67, 145.53, 142.67, 141.90, 138.47, 138.44, 137.43, 136.10, 135.69, 134.01, 133.45, 131.42, 131.25, 130.73, 130.29, 129.84, 129.64, 129.09, 128.91, 128.54, 128.19, 128.07, 128.00, 127.84, 127.60, 127.26, 127.16, 127.10, 127.01, 126.93, 126.66, 125.92, 124.79, 124.52, 116.91, 114.59, 109.67, 74.27, 58.08, 38.86, 37.12; Yield: 75%, yellow liquid; **HRMS-EI (m/z):** [M+Na]<sup>+</sup> calcd. for C<sub>27</sub>H<sub>24</sub>N<sub>2</sub>O<sub>2</sub>Na 431.1735 found 431.1735.

**(E/Z)-2-cyano-N-methyl-3-(2-((E)-4-(phenoxy)methyl)styryl)phenyl)-N-phenylacrylamide (1o):** A reaction

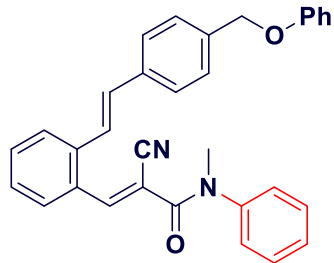

tube was charged with respective styryl aldehyde (1.0 equiv), 2-cyano-*N*-methyl-*N*-phenylacetamide (1.5 equiv), AcOH (20 mol%) and piperidine (20 mol%) in 5.0 mL of toluene. The reaction suspension was stirred at room temperature, and the progress of the reaction was monitored by TLC. Upon completion, water was added to quench the reaction mixture, which was then extracted with ethyl acetate (3×15 mL). Finally,

the combined organic layer was dried over sodium sulfate, filtered, and concentrated under vacuum. The residue was purified by column chromatography on silica gel to afford the **1o** as a mixture of E/Z isomers (4.3:1). **<sup>1</sup>H NMR** (400 MHz, CDCl<sub>3</sub>) δ 8.30 (s, 1H), 7.70 (d, *J* = 7.8 Hz, 1H), 7.56 (dd, *J* = 13.3, 8.0 Hz, 3H), 7.49 – 7.39 (m, 6H), 7.37 – 7.10 (m, 9H), 7.04 – 6.85 (m, 5H), 6.65 – 6.56 (m, 1H), 6.38 (d, *J* = 16.1 Hz, 1H), 6.15 (d, *J* = 16.1 Hz, 1H), 5.08 (d, *J* = 7.1 Hz, 3H), 3.46 (s, 3H), 3.23 (s, 1H); **<sup>13</sup>C NMR** (100 MHz, CDCl<sub>3</sub>) δ 163.01, 162.23, 158.54, 151.62, 145.43, 142.63, 141.87, 138.31, 137.31, 137.24, 137.21, 136.33, 135.94, 133.84, 133.27, 131.38, 131.23, 130.70, 130.28, 129.80, 129.42, 129.05, 128.87, 128.51, 128.14, 127.80, 127.76, 127.71, 127.62, 127.28, 127.15, 127.09, 127.04, 126.96, 126.77, 125.88, 125.01, 124.76, 120.95, 120.93, 116.87, 114.77, 114.74, 114.55, 111.09, 109.68, 69.45, 69.41, 38.82, 37.07; Yield: 77%, yellow solid, m.p. 127-129 °C; **HRMS-EI (m/z):** [M+Na]<sup>+</sup> calcd. for C<sub>32</sub>H<sub>26</sub>N<sub>2</sub>O<sub>2</sub>Na 493.1892 found 493.1888.

**(E/Z)-2-cyano-3-(2-((E)-4-((1,3-dioxoisindolin-2-yl)methyl)styryl)phenyl)-N-methyl-N-phenylacrylamide (1q):** A reaction

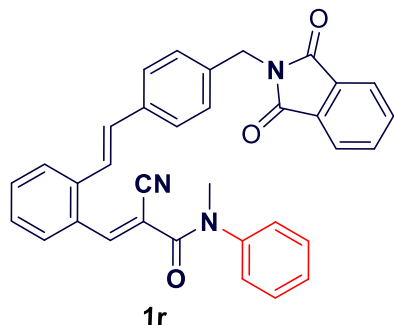

tube was charged with respective styryl aldehyde (1.0 equiv), 2-cyano-*N*-methyl-*N*-phenylacetamide (1.5 equiv), AcOH (20 mol%) and piperidine (20 mol%) in 5.0 mL of toluene. The reaction suspension was stirred at room temperature, and the progress of the reaction was monitored by TLC. Upon completion, water was added to quench the reaction mixture, which was then extracted with ethyl acetate (3×15 mL). Finally, the combined organic layer was dried over sodium sulfate, filtered, and concentrated under vacuum. The

residue was purified by column chromatography on silica gel to afford the **1q** as a mixture of E/Z isomers (2.9:1). **<sup>1</sup>H NMR** (400 MHz, CDCl<sub>3</sub>) δ 8.26 (s, 1H), 7.87 (dd, *J* = 5.5, 3.0 Hz, 3H), 7.78 – 7.65 (m, 4H), 7.56 (d, *J* = 7.5 Hz, 1H), 7.51 – 7.46 (m, 4H), 7.42 (ddd, *J* = 9.2, 4.3, 3.0 Hz, 4H), 7.38 – 7.28 (m, 2H), 7.26 – 7.21 (m, 2H), 7.19 – 7.11 (m, 2H), 6.88 (d, *J* = 16.0 Hz, 1H), 6.66 – 6.54 (m, 1H), 6.32 (dd, *J* = 16.1, 8.8 Hz, 1H), 6.09 (dd, *J* = 16.1, 7.6 Hz, 1H), 4.87 (d, *J* = 6.9 Hz, 3H), 3.46 (s, 3H), 3.32 (s, 1H), 3.23 (s, 1H); **<sup>13</sup>C NMR** (100 MHz, CDCl<sub>3</sub>) δ 167.98, 163.03, 151.64, 145.40, 142.67, 138.33, 136.47, 136.34, 134.04, 134.00, 133.82, 133.25, 132.03, 131.38, 130.72, 130.45, 130.33, 129.84, 129.10, 129.07, 128.96, 128.90, 128.54, 128.18, 127.86, 127.67, 127.33, 127.21, 127.16, 127.00, 126.91, 125.92, 125.25, 124.97, 123.35, 114.57, 109.70, 41.30, 38.86, 37.12; Yield: 74%, yellow solid, m.p. 121-123 °C; **HRMS-EI (m/z):** [M+Na]<sup>+</sup> calcd. for C<sub>34</sub>H<sub>25</sub>N<sub>3</sub>O<sub>3</sub>Na 546.1794 found 546.1788.

**(E/Z)-2-cyano-N-methyl-N-phenyl-3-(2-((E)-2-(pyridin-2-yl)vinyl)phenyl)acrylamide (1t):** A reaction tube

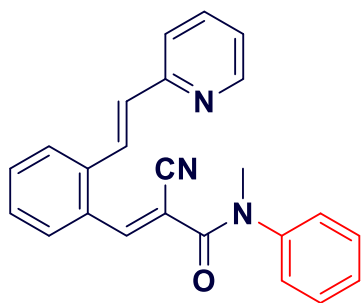

was charged with respective styryl aldehyde (1.0 equiv), 2-cyano-N-methyl-N-phenylacetamide (1.5 equiv), AcOH (20 mol%) and piperidine (20 mol%) in 5.0 mL of toluene. The reaction suspension was stirred at room temperature, and the progress of the reaction was monitored by TLC. Upon completion, water was added to quench the reaction mixture, which was then extracted with ethyl acetate (3×15 mL). Finally, the combined organic layer was dried over sodium sulfate, filtered,

and concentrated under vacuum. The residue was purified by column chromatography on silica gel to afford the **1t** as a mixture of E/Z isomers (9:1). **<sup>1</sup>H NMR** (400 MHz, CDCl<sub>3</sub>) δ 8.69 – 8.61 (m, 1H), 8.35 (s, 1H), 7.79 (d, *J* = 15.8 Hz, 1H), 7.75 – 7.60 (m, 3H), 7.48 – 7.25 (m, 8H), 7.21 (ddd, *J* = 7.5, 4.8, 1.0 Hz, 1H), 7.11 (ddd, *J* = 30.4, 13.9, 7.6 Hz, 1H), 6.98 (d, *J* = 15.8 Hz, 1H), 3.47 (s, 3H), 3.24 (s, 1H); **<sup>13</sup>C NMR** (100 MHz, CDCl<sub>3</sub>) δ 163.01, 154.73, 151.66, 149.71, 145.42, 142.59, 137.67, 136.64, 136.49, 133.24, 133.09, 131.32, 130.83, 130.77, 129.83, 129.10, 128.94, 128.66, 128.54, 128.15, 127.82, 127.71, 127.52, 127.08, 125.82, 122.74, 122.66, 114.48, 110.06, 38.79; Yield: 91%, yellow solid, m.p. 100-102 °C; **HRMS-EI (m/z):** [M+Na]<sup>+</sup> calcd. for C<sub>24</sub>H<sub>19</sub>N<sub>3</sub>ONa 388.1435 found 388.1428.

**(E/Z)-2-cyano-N-ethyl-N-phenyl-3-(2-((E)-styryl)phenyl)acrylamide (1v):** A reaction tube was charged with

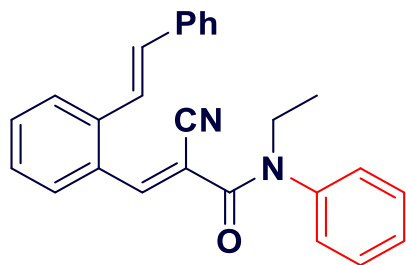

respective styryl aldehyde (1.0 equiv), 2-cyano-N-ethyl-N-phenylacetamide (1.5 equiv), AcOH (20 mol%) and piperidine (20 mol%) in 5.0 mL of toluene. The reaction suspension was stirred at room temperature, and the progress of the reaction was monitored by TLC. Upon completion, water was added to quench the reaction mixture, which was then extracted with ethyl acetate (3×15

mL). Finally, the combined organic layer was dried over sodium sulfate, filtered, and concentrated under vacuum. The residue was purified by column chromatography on silica gel to afford the **1v** as a mixture of E/Z isomers (2.9:1). **<sup>1</sup>H NMR** (400 MHz, CDCl<sub>3</sub>) δ 8.28 (s, 1H), 7.67 (d, *J* = 7.8 Hz, 1H), 7.59-7.44 (m, 4H), 7.44-7.21 (m, 12H), 7.18-7.11 (m, 2H), 6.92 (d, *J* = 16.0 Hz, 1H), 6.60 (dd, *J* = 7.7, 1.8 Hz, 1H), 6.41 (d, *J* = 16.1 Hz, 1H), 6.15 (d, *J* = 16.1 Hz, 1H), 3.92 (q, *J* = 7.1 Hz, 2H), 3.70 (q, *J* = 7.2 Hz, 1H), 1.21 (t, *J* = 7.1 Hz, 3H), 1.09 (t, *J* = 7.2 Hz, 1H); **<sup>13</sup>C NMR** (100 MHz, CDCl<sub>3</sub>) δ 162.49, 161.67, 151.45, 144.96, 140.85, 140.30, 138.31, 137.32, 136.66, 136.25, 134.20, 133.81, 131.26, 131.19, 130.68, 130.32, 130.00, 129.68, 129.43, 129.14, 129.11, 128.67, 128.61, 128.47, 128.27, 128.21, 128.00, 127.96, 127.51, 127.17, 127.09, 126.92, 126.83, 126.56, 124.86, 124.64, 116.96, 114.63, 111.43, 110.06, 46.04, 44.50, 12.58, 12.34; Yield: 89%, pale yellow solid, m.p. 105-107 °C; **HRMS-EI (m/z):** [M+Na]<sup>+</sup> calcd. for C<sub>26</sub>H<sub>22</sub>N<sub>2</sub>O 378.1732 found 378.1729.

**(E/Z)-2-cyano-N-methyl-3-(2-((E)-styryl)phenyl)-N-(p-tolyl)acrylamide (1w):** A reaction tube was charged

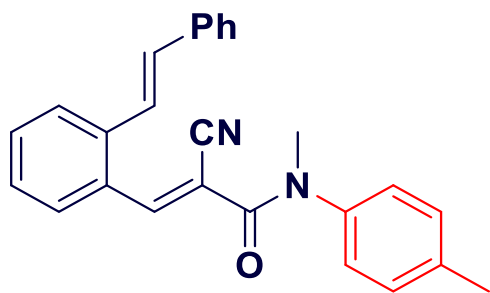

with respective styryl aldehyde (1.0 equiv), 2-cyano-*N*-methyl-*N*-(*p*-tolyl)acetamide (1.5 equiv), AcOH (20 mol%) and piperidine (20 mol%) in 5.0 mL of toluene. The reaction suspension was stirred at room temperature, and the progress of the reaction was monitored by TLC. Upon completion, water was added to quench the reaction mixture, which was then extracted with ethyl acetate (3×15 mL). Finally, the

combined organic layer was dried over sodium sulfate, filtered, and concentrated under vacuum. The residue was purified by column chromatography on silica gel to afford the **1w** as a mixture of E/Z isomers (2.6:1). **<sup>1</sup>H NMR** (400 MHz, CDCl<sub>3</sub>) δ 8.29 (s, 1H), 7.71 (d, *J* = 7.8 Hz, 1H), 7.61-7.50 (m, 3H), 7.47-7.25 (m, 9H), 7.15 (ddd, *J* = 11.2, 8.4, 5.4 Hz, 6H), 6.97-6.88 (m, 2H), 6.45 (dd, *J* = 20.1, 12.2 Hz, 1H), 6.14 (d, *J* = 16.2 Hz, 1H), 3.43 (s, 3H), 3.19 (s, 1H), 2.35 (s, 3H), 2.03 (s, 1H); **<sup>13</sup>C NMR** (101 MHz, CDCl<sub>3</sub>) δ 163.06, 162.26, 151.35, 145.38, 140.02, 139.29, 138.34, 138.15, 137.94, 137.27, 136.67, 136.26, 134.21, 133.50, 131.35, 131.28, 130.57, 130.38, 130.22, 129.68, 128.93, 128.71, 128.64, 128.50, 128.44, 128.30, 127.90, 127.55, 127.21, 127.11, 127.00, 126.82, 126.74, 126.59, 126.49, 125.65, 124.85, 124.59, 116.91, 114.61, 111.26, 109.88, 38.85, 37.08, 29.60, 21.07, 20.70; Yield: 86%, pale yellow solid, m.p. 72-74 °C. **HRMS-EI (m/z):** [M+Na]<sup>+</sup> calcd. for C<sub>26</sub>H<sub>22</sub>N<sub>2</sub>ONa 378.1732 found 378.1731.

**(E)-2-cyano-N-methyl-N-phenyl-3-(2-vinylphenyl)acrylamide (1ad):** A reaction tube was charged with

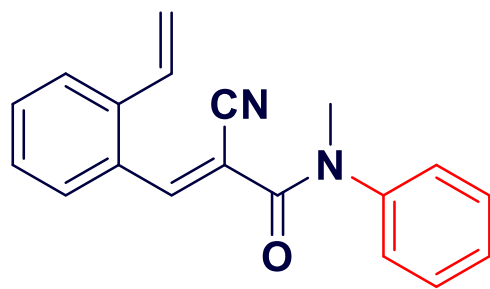

respective styryl aldehyde (1.0 equiv), 2-cyano-*N*-ethyl-*N*-phenylacetamide (1.5 equiv), AcOH (20 mol%) and piperidine (20 mol%) in 5.0 mL of toluene. The reaction suspension was stirred at room temperature, and the progress of the reaction was monitored by TLC. Upon completion, water was added to quench the reaction mixture, which was then extracted with ethyl acetate (3×15 mL). Finally, the

combined organic layer was dried over sodium sulfate, filtered, and concentrated under vacuum. The residue was purified by column chromatography on silica gel to afford the **1ad** as a mixture of E/Z isomers (9.7:0.3). **<sup>1</sup>H NMR** (400 MHz, CDCl<sub>3</sub>) δ 8.16 (s, 1H), 7.67 (d, *J* = 7.8 Hz, 1H), 7.49 – 7.35 (m, 5H), 7.30 – 7.23 (m, 3H), 6.70 (dd, *J* = 17.3, 11.0 Hz, 1H), 5.54 (dd, *J* = 17.3, 1.0 Hz, 1H), 5.43 (dd, *J* = 11.0, 1.0 Hz, 1H), 3.46 (s, 3H); **<sup>13</sup>C NMR** (100 MHz, CDCl<sub>3</sub>) δ 163.04, 151.67, 142.73, 138.61, 133.56, 131.27, 130.06, 129.83, 128.25, 128.08, 127.80, 126.97, 126.65, 119.50, 114.53, 109.89, 109.72, 38.79; Yield: 87%, yellow solid, m.p. 100-102 °C; **HRMS-EI (m/z):** [M+Na]<sup>+</sup> calcd. for C<sub>19</sub>H<sub>16</sub>N<sub>2</sub>ONa 311.1160 found 311.1157.

**(E/Z)-2-cyano-N-cyclohexyl-N-phenyl-3-(2-((E)-styryl)phenyl)acrylamide (1ag):** A reaction tube was

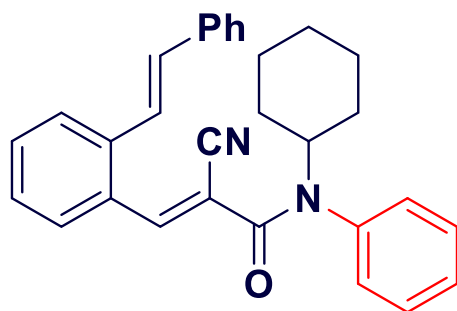

charged with respective styryl aldehyde (1.0 equiv), 2-cyano-*N*-hexyl-*N*-phenylacetamide (1.5 equiv), AcOH (20 mol%) and piperidine (20 mol%) in 5.0 mL of toluene. The reaction suspension was stirred at room temperature, and the progress of the reaction was monitored by TLC. Upon completion, water was added to quench the reaction mixture, which was then extracted with ethyl acetate (3×15 mL). Finally, the combined organic layer was dried over sodium sulfate, filtered, and concentrated under

vacuum. The residue was purified by column chromatography on silica gel to afford the **1ag** as a mixture of E/Z isomers (9.7:0.3). **<sup>1</sup>H NMR** (400 MHz, CDCl<sub>3</sub>) δ 8.12 (s, 1H), 7.62 – 7.50 (m, 3H), 7.46 (td, *J* = 7.6, 1.2 Hz, 1H), 7.43 – 7.27 (m, 6H), 7.25 – 7.12 (m, 4H), 7.10 (s, 1H), 6.91 (d, *J* = 16.1 Hz, 1H), 6.55 (d, *J* = 7.1 Hz, 1H), 6.47 (d, *J* = 16.2 Hz, 1H), 6.19 (d, *J* = 16.2 Hz, 1H), 4.67 – 4.46 (m, 1H), 1.94 (d, *J* = 11.3 Hz, 1H), 1.84 – 1.55 (m, 4H), 1.49 – 1.34 (m, 2H), 1.31 – 1.18 (m, 1H), 1.06 – 0.79 (m, 2H); **<sup>13</sup>C NMR** (100 MHz, CDCl<sub>3</sub>) δ 162.80, 161.69, 150.74, 143.89, 138.10, 137.61, 137.30, 137.20, 136.73, 136.30, 134.09, 133.96, 131.34, 131.07, 130.96, 130.74, 130.50, 129.43, 129.11, 128.96, 128.88, 128.86, 128.73, 128.66, 128.49, 128.47, 128.31, 128.29, 127.52, 127.31, 127.18, 127.04, 126.83, 126.59, 124.99, 124.80, 117.05, 114.88, 112.02, 110.97, 56.74, 55.44, 31.24, 30.81, 25.71, 25.52, 25.21, 25.09; Yield: 91%, yellow solid, m.p. 100-102 °C; **HRMS-EI (m/z):** (M+Na) calcd. for C<sub>30</sub>H<sub>28</sub>N<sub>2</sub>ONa 455.2075 found 455.2071.

**(E)-2-cyano-N-methyl-N-phenyl-3-(3-((E)-styryl)thiophen-2-yl)acrylamide (1al):** A reaction tube was

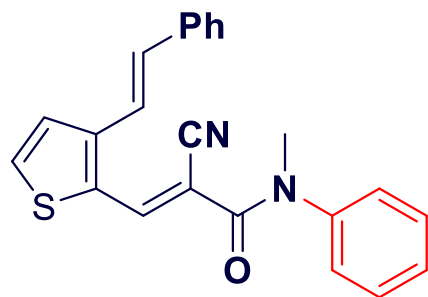

charged with respective styryl aldehyde (1.0 equiv), 2-cyano-*N*-hexyl-*N*-phenylacetamide (1.5 equiv), AcOH (20 mol%) and piperidine (20 mol%) in 5.0 mL of toluene. The reaction suspension was stirred at room temperature, and the progress of the reaction was monitored by TLC. Upon completion, water was added to quench the reaction mixture, which was then extracted with ethyl acetate (3×15 mL). Finally, the combined organic layer

was dried over sodium sulfate, filtered, and concentrated under vacuum. The residue was purified by column chromatography on silica gel to afford the **1al** as a mixture of E/Z isomers (9.8:0.2). **<sup>1</sup>H NMR** (400 MHz, CDCl<sub>3</sub>) δ 8.56 (s, 1H), 7.55 (dd, *J* = 6.0, 3.0 Hz, 3H), 7.47 – 7.30 (m, 9H), 7.28 – 7.22 (m, 2H), 7.11 (d, *J* = 16.0 Hz, 1H), 3.47 (s, 3H); **<sup>13</sup>C NMR** (100 MHz, CDCl<sub>3</sub>) δ 163.50, 146.79, 143.11, 142.88, 136.27, 134.01, 133.70, 132.30, 131.35, 129.81, 129.50, 128.79, 128.66, 128.12, 127.04, 126.90, 126.74, 125.98, 125.62, 119.20, 115.38, 101.85, 39.25; Yield: 80%, yellow solid, m.p. 121-123 °C; **HRMS-EI (m/z):** [M+Na]<sup>+</sup> calcd. for C<sub>23</sub>H<sub>18</sub>N<sub>2</sub>OSNa 393.1017 found 393.1015.

**(E/Z)-2-cyano-N-(4-methoxyphenyl)-N-methyl-3-(2-((E)-styryl)phenyl)acrylamide (1aq):** A reaction tube

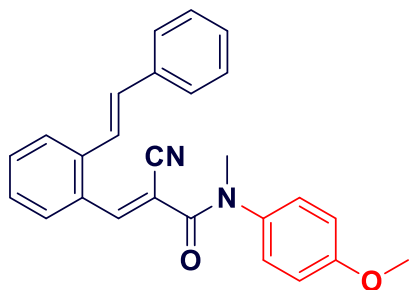

was charged with respective styryl aldehyde (1.0 equiv), 2-cyano-*N*-hexyl-*N*-phenylacetamide (1.5 equiv), AcOH (20 mol%) and piperidine (20 mol%) in 5.0 mL of toluene. The reaction suspension was stirred at room temperature, and the progress of the reaction was monitored by TLC. Upon completion, water was added to quench the reaction mixture, which was then extracted with ethyl acetate (3×15 mL). Finally, the combined organic layer was dried over

sodium sulfate, filtered, and concentrated under vacuum. The residue was purified by column chromatography on silica gel to afford the **1aq** as a mixture of E/Z isomers (3:1). **<sup>1</sup>H NMR** (400 MHz, CDCl<sub>3</sub>) δ 8.32 (s, 1H), 7.71 (d, *J* = 7.7 Hz, 1H), 7.60 (d, *J* = 7.8 Hz, 1H), 7.54 (dd, *J* = 8.1, 1.0 Hz, 2H), 7.51 – 7.37 (m, 5H), 7.37 – 7.27 (m, 4H), 7.24 (d, *J* = 1.5 Hz, 1H), 7.17 (dt, *J* = 5.7, 4.9 Hz, 3H), 6.98 – 6.88 (m, 3H), 6.65 (d, *J* = 9.1 Hz, 1H), 6.49 (dd, *J* = 25.3, 12.5 Hz, 1H), 6.26 (d, *J* = 16.1 Hz, 1H), 3.80 (s, 3H), 3.47 (s, 1H), 3.42 (s, 3H), 3.20 (s, 1H); **<sup>13</sup>C NMR** (100 MHz, CDCl<sub>3</sub>) δ 163.17, 159.25, 158.93, 151.48, 145.27, 138.38, 137.32, 136.71, 136.33, 135.27, 134.64, 134.24, 133.69, 131.34, 130.66, 130.44, 129.01, 128.77, 128.66, 128.57, 128.40, 128.36, 127.62, 127.34, 127.14, 127.09, 127.03, 126.87, 126.63, 124.91, 124.75, 114.95, 114.66, 114.22, 109.94, 55.44, 55.01, 39.08, 37.28, 30.92; Yield: 87%, yellow solid, m.p. = 137-138 °C; **HRMS (EI) m/z**: [M+Na]<sup>+</sup> calcd. for C<sub>26</sub>H<sub>22</sub>N<sub>2</sub>O<sub>2</sub>Na 417.1578 found 417.1575.

**3-methyl-2-oxo-13-phenyl-2,3,8,12b-tetrahydro-1,8-methanodibenzo[*e,h*]indole-1(7a*H*)-carbonitrile (2):** A

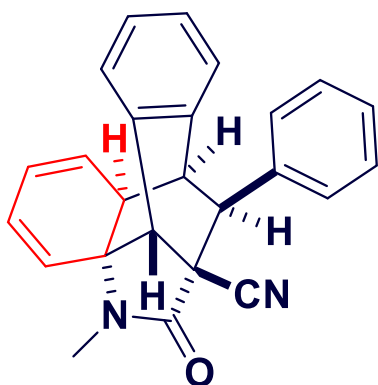

clean vial (5 mL) equipped with a magnetic stir bar were added to **1a** (0.2 mmol), 4CzIPN (2.5 mol%) and 2-MeTHF (3.0 mL) at room temperature, and then placed at a distance of approx. 3 cm from a 24 W blue LED, and the solution was stirred at room temperature under visible-light irradiation for 6-24 h. The progress of the reaction was monitored by thin layer chromatography. When the reaction was complete, the solvent was removed under reduced pressure. The residue was purified by column chromatography on silica gel eluting with Hex/EA = 80;20-60:40 to afford the dearomative cyclization product **2**

derivative. **<sup>1</sup>H NMR** (400 MHz, CDCl<sub>3</sub>, major isomer) δ 7.47 (d, *J* = 6.8 Hz, 1H), 7.39 (td, *J* = 7.5, 1.3 Hz, 1H), 7.31 (td, *J* = 7.5, 1.3 Hz, 1H), 7.19-7.13 (m, 1H), 7.08 (t, *J* = 7.5 Hz, 2H), 6.92 (d, *J* = 7.2 Hz, 1H), 6.39 (d, *J* = 7.3 Hz, 2H), 5.84 (dd, *J* = 9.8, 5.4 Hz, 1H), 5.48-5.37 (m, 1H), 5.36-5.24 (m, 2H), 3.73 (d, *J* = 2.5 Hz, 1H), 3.59 (s, 1H), 3.40 (t, *J* = 2.8 Hz, 1H), 3.20 (dd, *J* = 5.9, 3.0 Hz, 1H), 2.98 (s, 3H); **<sup>13</sup>C NMR** (101 MHz, CDCl<sub>3</sub>, major isomer) δ 171.28, 138.31, 137.78, 132.02, 128.97, 128.78, 128.34, 127.94, 127.91, 127.87, 127.77, 127.50, 127.44, 122.40, 120.97, 116.82, 64.98, 53.72, 51.73, 50.87, 47.21, 44.17, 27.49; Yield: 91% d.r. 20:1, White solid, m.p. = 292-294 °C; **HRMS (EI) m/z**: calc'd for C<sub>25</sub>H<sub>20</sub>N<sub>2</sub>O [M+Na]<sup>+</sup>, 364.1576; found, 364.1574.

**3-methyl-2-oxo-14-phenyl-2,3,8,13*b*-tetrahydro-1,8-methano[1,3]dioxolo[4',5':4,5]benzo[1,2-**

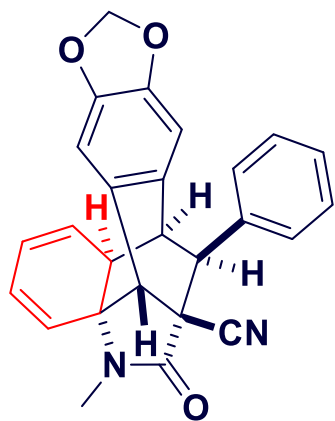

**e]benzo[*h*]indole-1(7*aH*)-carbonitrile (3):** A clean vial (5 mL) equipped with a magnetic stir bar were added to **1b** (0.2 mmol), 4CzIPN (2.5 mol%) and 2-MeTHF (3.0 mL) at room temperature, and then placed at a distance of approx. 3 cm from a 24 W blue LED, and the solution was stirred at room temperature under visible-light irradiation for 6-24 h. The progress of the reaction was monitored by thin layer chromatography. When the reaction was complete, the solvent was removed under reduced pressure. The residue was purified by column chromatography on silica gel eluting with Hex/EA = 80:20-60:40 to afford the dearomative cyclization product **3** derivatives. **<sup>1</sup>H NMR** (597 MHz, CDCl<sub>3</sub>, major isomer)  $\delta$  7.19 (t,  $J$  = 7.3 Hz, 1H),

7.14 (t,  $J$  = 7.4 Hz, 2H), 6.95 (s, 1H), 6.51 (d,  $J$  = 7.4 Hz, 2H), 6.43 (s, 1H), 6.01 (dd,  $J$  = 14.8, 1.4 Hz, 2H), 5.86 (dd,  $J$  = 9.8, 5.6 Hz, 1H), 5.50 – 5.43 (m, 1H), 5.32 – 5.22 (m, 2H), 3.68 (d,  $J$  = 2.1 Hz, 1H), 3.50 (s, 1H), 3.32 (s, 1H), 3.14 (d,  $J$  = 2.6 Hz, 1H), 2.96 (s, 3H); **<sup>13</sup>C NMR** (150 MHz, CDCl<sub>3</sub>, major diastereomer)  $\delta$  171.29, 147.95, 146.91, 138.39, 131.61, 129.05, 128.74, 128.05, 127.86, 125.04, 122.51, 121.17, 116.82, 108.86, 108.63, 101.08, 64.98, 54.05, 52.03, 50.83, 47.49, 44.54, 27.56; Yield: 73%, d.r. 20:1 Off-white solid, m.p.= 173-175 °C; **HRMS-EI (m/z)**: calc'd for C<sub>26</sub>H<sub>20</sub>N<sub>2</sub>O<sub>3</sub>Na [M+Na]<sup>+</sup>, 431.1372; found, 431.1370.

**10,11-dimethoxy-3-methyl-2-oxo-13-phenyl-2,3,8,12*b*-tetrahydro-1,8-methanodibenzo[*e,h*]indole-1(7*aH*)-carbonitrile (4):** A clean vial (5 mL) equipped with a magnetic stir bar were added to **1c** (0.2 mmol), 4CzIPN

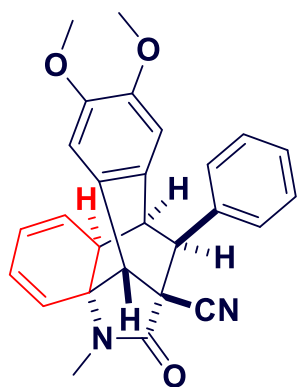

(2.5 mol%) and 2-MeTHF (3.0 mL) at room temperature, and then placed at a distance of approx. 3 cm from a 24 W blue LED, and the solution was stirred at room temperature under visible-light irradiation for 6-24 h. The progress of the reaction was monitored by thin layer chromatography. When the reaction was complete, the solvent was removed under reduced pressure. The residue was purified by column chromatography on silica gel eluting with Hex/EA = 80:20-60:40 to afford the dearomative cyclization product **4** derivatives. **<sup>1</sup>H NMR** (400 MHz, CDCl<sub>3</sub>, mixer of diastereomers)  $\delta$  7.20-7.14 (m, 1H), 7.10 (t,  $J$  = 7.4 Hz, 2H), 7.03 (d,  $J$  = 2.3 Hz, 1H),

6.84 – 6.81 (m, 1H), 6.42 (d,  $J$  = 7.3 Hz, 2H), 5.85 (dd,  $J$  = 9.8, 5.8 Hz, 1H), 5.49-5.40 (m, 1H), 5.28 (dd,  $J$  = 14.7, 6.3 Hz, 2H), 3.88 (s, 3H), 3.71 (d,  $J$  = 2.4 Hz, 1H), 3.54 (d,  $J$  = 5.9 Hz, 1H), 3.34 (t,  $J$  = 2.7 Hz, 1H), 3.17 (d,  $J$  = 2.8 Hz, 1H), 2.97 (s, 3H); **<sup>13</sup>C NMR** (100 MHz, CDCl<sub>3</sub>, mixer of diastereomers)  $\delta$  171.44, 159.05, 138.47, 133.19, 129.74, 129.64, 129.07, 129.02, 128.34, 128.12, 127.91, 127.80, 122.36, 120.99, 116.82, 113.92, 113.46, 65.04, 55.35, 54.21, 52.12, 46.59, 44.45, 27.51; Yield: 70%, d.r. 7:1 Off-white solid, m.p.= 142-144 °C; **HRMS-EI (m/z)**: calc'd for C<sub>27</sub>H<sub>24</sub>N<sub>2</sub>O<sub>3</sub>Na [M+Na]<sup>+</sup> 447.1684; found, 447.1680.

### 3,11-dimethyl-2-oxo-13-phenyl-2,3,8,12*b*-tetrahydro-1,8-methanodibenzo[*e,h*]indole-1(7*aH*)-carbonitrile

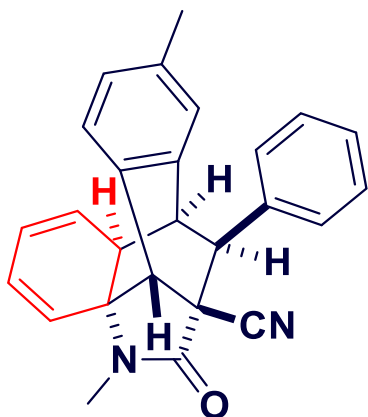

(**5**): A clean vial (5 mL) equipped with a magnetic stir bar were added to **1d** (0.2 mmol), 4CzIPN (2.5 mol%) and 2-MeTHF (3.0 mL) at room temperature, and then placed at a distance of approx. 3 cm from a 24 W blue LED, and the solution was stirred at room temperature under visible-light irradiation for 6-24 h. The progress of the reaction was monitored by thin layer chromatography. When the reaction was complete, the solvent was removed under reduced pressure. The residue was purified by column chromatography on silica gel eluting with Hex/EA = 80:20-60:40 to afford the dearomative cyclization product **5** derivatives. <sup>1</sup>H NMR (400 MHz, CDCl<sub>3</sub>, major isomer) δ 7.34 (d, *J* = 7.5 Hz, 1H), 7.21-7.12 (m, 2H), 7.08 (t, *J* = 7.4 Hz, 2H), 6.73 (s, 1H), 6.40 (d, *J* = 7.3 Hz, 2H), 5.83 (dd, *J* = 9.8, 5.7 Hz, 1H), 5.48-5.36 (m, 1H), 5.28 (dd, *J* = 13.5, 6.4 Hz, 2H), 3.70 (d, *J* = 2.3 Hz, 1H), 3.53 (d, *J* = 9.1 Hz, 1H), 3.33 (s, 1H), 3.17 (d, *J* = 2.6 Hz, 1H), 2.97 (s, 3H), 2.32 (s, 3H); <sup>13</sup>C NMR (101 MHz, CDCl<sub>3</sub>, major isomer) δ 171.43, 138.45, 138.21, 137.59, 129.07, 128.91, 128.65, 128.20, 128.17, 127.89, 127.86, 127.76, 127.66, 127.23, 122.53, 120.98, 116.87, 65.09, 53.56, 51.88, 50.98, 47.27, 46.88, 44.30, 27.50, 21.43; Yield: 84%, d.r. 20:1, White solid, m.p.= 194-196 °C; HRMS-EI (*m/z*): calc'd for C<sub>26</sub>H<sub>22</sub>N<sub>2</sub>ONa [M+Na]<sup>+</sup>, 401.1630; found, 401.1625.

### 11-fluoro-3-methyl-2-oxo-13-phenyl-2,3,8,12*b*-tetrahydro-1,8-methanodibenzo[*e,h*]indole-1(7*aH*)-carbonitrile (**6**):

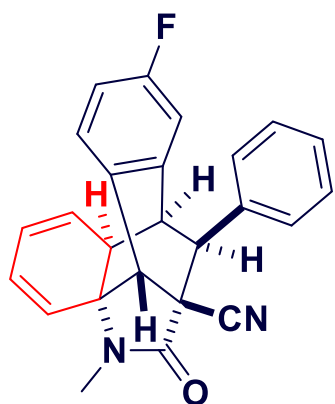

A clean vial (5 mL) equipped with a magnetic stir bar were added to **1e** (0.2 mmol), 4CzIPN (2.5 mol%) and 2-MeTHF (3.0 mL) at room temperature, and then placed at a distance of approx. 3 cm from a 24 W blue LED, and the solution was stirred at room temperature under visible-light irradiation for 6-24 h. The progress of the reaction was monitored by thin layer chromatography. When the reaction was complete, the solvent was removed under reduced pressure. The residue was purified by column chromatography on silica gel eluting with Hex/EA = 80:20-60:40 to afford the dearomative cyclization product **6** derivatives. <sup>1</sup>H NMR (400

MHz, CDCl<sub>3</sub>, major isomer) δ 7.49-6.99 (m, 6H), 6.77 (ddd, *J* = 10.6, 8.2, 3.8 Hz, 1H), 6.42 (t, *J* = 6.8 Hz, 2H), 5.91 – 5.77 (m, 1H), 5.44 (ddd, *J* = 11.9, 5.8, 3.0 Hz, 1H), 5.36-5.20 (m, 2H), 3.74 (d, *J* = 2.0 Hz, 1H), 3.58 (d, *J* = 9.2 Hz, 1H), 3.40 (s, 1H), 3.19 (d, *J* = 2.8 Hz, 1H), 2.98 (s, 3H); <sup>13</sup>C NMR (101 MHz, CDCl<sub>3</sub>) δ 170.98, 164.18, 163.22, 161.70, (d, *J*<sub>C-F</sub> = 245 Hz), 160.77, 140.16 (d, *J*<sub>C-F</sub> = 8.7 Hz), 138.10 (d, *J*<sub>C-F</sub> = 12 Hz), 137.98, 134.04 (d, *J*<sub>C-F</sub> = 8 Hz), 133.96, 133.56 (d, *J*<sub>C-F</sub> = 3 Hz), 129.52, 129.44 (d, *J*<sub>C-F</sub> = 8 Hz), 128.92, 128.87, 128.66, 128.38, 128.17, 128.10, 128.01, 127.95, 122.37, 122.22 (d, *J*<sub>C-F</sub> = 15 Hz), 121.29, 121.17 (d, *J*<sub>C-F</sub> = 12 Hz), 116.68, 116.57 (d, *J*<sub>C-F</sub> = 11 Hz), 115.47, 115.45 (d, *J*<sub>C-F</sub> = 2 Hz), 115.23, 115.05, 114.83, 114.61 (dd, *J*<sub>C-F</sub> = 44 Hz), 114.39, 64.84, 53.78, 53.16, 51.78, 51.45, 50.66, 47.52, 46.77, 44.25, 44.11, 27.55, 27.53; Yield: 76%, d.r. 20:1, Off-white solid, m.p.= 298-300 °C; HRMS-EI (*m/z*): calc'd for C<sub>25</sub>H<sub>19</sub>FN<sub>2</sub>ONa [M+Na]<sup>+</sup> 405.1379; found, 405.1376.

**11-chloro-3-methyl-2-oxo-13-phenyl-2,3,8,12*b*-tetrahydro-1,8-methanodibenzo[*e,h*]indole-1(7*aH*)-**

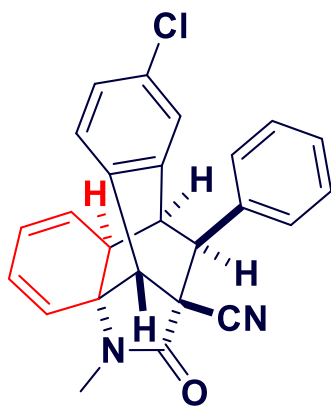

**carbonitrile (8):** A clean vial (5 mL) equipped with a magnetic stir bar were added to **1f** (0.2 mmol), 4CzIPN (2.5 mol%) and 2-MeTHF (3.0 mL) at room temperature, and then placed at a distance of approx. 3 cm from a 24 W blue LED, and the solution was stirred at room temperature under visible-light irradiation for 6-24 h. The progress of the reaction was monitored by thin layer chromatography. When the reaction was complete, the solvent was removed under reduced pressure. The residue was purified by column chromatography on silica gel eluting with Hex/EA = 80:20-60:40 to afford the dearomative cyclization product **7** derivatives. <sup>1</sup>H

**NMR** (400 MHz, CDCl<sub>3</sub>, major isomer) δ 7.46 (t, *J* = 16.8 Hz, 1H), 7.39-7.28 (m, 1H), 7.23-7.08 (m, 3H), 6.89 (dd, *J* = 16.8, 4.9 Hz, 1H), 6.43 (d, *J* = 7.3 Hz, 2H), 5.87 (dd, *J* = 9.8, 5.7 Hz, 1H), 5.50-5.40 (m, 1H), 5.34-5.22 (m, 2H), 3.74 (d, *J* = 2.5 Hz, 1H), 3.57 (d, *J* = 10.7 Hz, 1H), 3.39 (dd, *J* = 6.2, 3.5 Hz, 1H), 3.20 (d, *J* = 2.8 Hz, 1H), 2.98 (s, 3H); <sup>13</sup>C **NMR** (101 MHz, CDCl<sub>3</sub>, major isomer) δ 170.93, 138.00, 136.42, 133.96, 133.25, 129.17, 128.92, 128.88, 128.67, 128.60, 128.48, 128.43, 128.25, 128.13, 128.08, 128.01, 127.77, 127.57, 122.31, 122.22, 121.39, 121.31, 116.54, 114.08, 64.84, 53.53, 53.26, 51.64, 51.50, 50.67, 47.28, 46.91, 44.21, 44.13, 27.54; Yield: 80%, d.r. 20:1, White solid, m.p.= 241-243 °C; **HRMS-EI (m/z)**: calc'd for C<sub>25</sub>H<sub>19</sub>ClN<sub>2</sub>O<sub>2</sub>Na [M+Na]<sup>+</sup> 421.1084; found, 421.1080.

**11-methoxy-3-methyl-2-oxo-13-phenyl-2,3,8,12*b*-tetrahydro-1,8-methanodibenzo[*e,h*]indole-1(7*aH*)-**

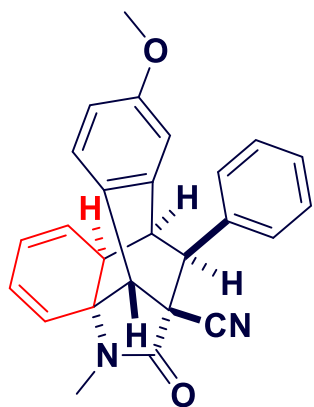

**carbonitrile (8):** A clean vial (5 mL) equipped with a magnetic stir bar were added to **1g** (0.2 mmol) 4CzIPN (2.5 mol%) and 2-MeTHF (3.0 mL) at room temperature, and then placed at a distance of approx. 3 cm from a 24 W blue LED, and the solution was stirred at room temperature under visible-light irradiation for 6-24 h. The progress of the reaction was monitored by thin layer chromatography. When the reaction was complete, water was added to quench the reaction mixture, followed by extraction with ethyl acetate (3×10 mL). Finally, the combined organic layer was dried over Na<sub>2</sub>SO<sub>4</sub>, filtered, and the solvent was removed under reduced pressure. The residue was purified by column chromatography on silica gel eluting with Hex/EA = 80:20-60:40 to afford the

dearomative cyclization product **8** derivatives. <sup>1</sup>H **NMR** (400 MHz, CDCl<sub>3</sub>, major isomer) δ 7.16 (ddd, *J* = 6.4, 3.7, 1.2 Hz, 1H), 7.10 (t, *J* = 7.4 Hz, 2H), 7.03 (d, *J* = 2.3 Hz, 1H), 6.83 (dt, *J* = 14.1, 5.3 Hz, 2H), 6.42 (d, *J* = 7.3 Hz, 2H), 5.85 (dd, *J* = 9.9, 5.7 Hz, 1H), 5.43 (ddd, *J* = 10.1, 5.7, 2.6 Hz, 1H), 5.28 (dd, *J* = 15.4, 6.4 Hz, 2H), 3.86 (d, *J* = 5.7 Hz, 3H), 3.71 (d, *J* = 2.5 Hz, 1H), 3.53 (s, 1H), 3.34 (t, *J* = 2.8 Hz, 1H), 3.19 – 3.15 (m, 1H), 2.97 (s, 3H); <sup>13</sup>C **NMR** (101 MHz, CDCl<sub>3</sub>, major isomer) δ 171.32, 159.03, 138.47, 133.18, 130.00, 129.63, 129.05, 128.99, 128.87, 128.69, 128.32, 128.09, 127.88, 127.77, 125.15, 122.32, 120.96, 116.81, 113.90, 113.45, 65.04, 55.33, 54.18, 52.09, 50.90, 46.57, 44.43, 35.97, 27.48; Yield: 85%, d.r. 20:1, White solid, m.p.= 288-290°C; **HRMS-EI (m/z)** calc'd for C<sub>26</sub>H<sub>24</sub>N<sub>2</sub>O<sub>2</sub> [M+H]<sup>+</sup> 395.1755; found, 395.1759.

**13-(4-methoxyphenyl)-3-methyl-2-oxo-2,3,8,12b-tetrahydro-1,8-methanodibenzo[*e,h*]indole-1(7*aH*)-**

**carbonitrile (9):** A clean vial (5 mL) equipped with a magnetic stir bar were added to **1g** (0.2 mmol), 4CzIPN (2.5 mol%) and 2-MeTHF (3.0 mL) at room temperature, and then placed at a distance of approx. 3 cm from a 24 W blue LED, and the solution was stirred at room temperature under visible-light irradiation for 6-24 h. The progress of the reaction was monitored by thin layer chromatography. When the reaction was complete, the solvent was removed under reduced pressure. The residue was purified by column chromatography on silica gel eluting with Hex/EA = 80:20-60:40 to afford the dearomative cyclization product **9** derivatives. <sup>1</sup>H

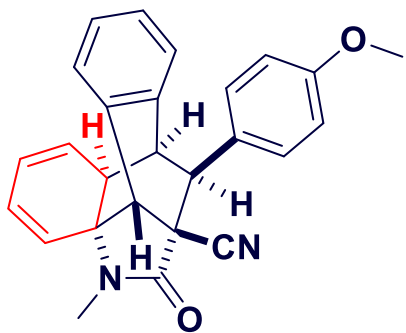

**NMR** (400 MHz, CDCl<sub>3</sub>, major isomer)  $\delta$  7.46 (d, *J* = 7.0 Hz, 1H), 7.35 (dtd, *J* = 18.4, 7.6, 1.3 Hz, 2H), 6.93 (d, *J* = 6.8 Hz, 1H), 6.60 (d, *J* = 8.9 Hz, 2H), 6.29 (d, *J* = 8.7 Hz, 2H), 5.83 (dd, *J* = 9.9, 5.5 Hz, 1H), 5.45-5.36 (m, 1H), 5.33-5.24 (m, 2H), 3.70 (s, 3H), 3.69 (s, 1H), 3.57 (s, 1H), 3.37 (t, *J* = 2.7 Hz, 1H), 3.18 (dd, *J* = 5.7, 2.8 Hz, 1H), 2.97 (s, 3H); <sup>13</sup>C **NMR** (100 MHz, CDCl<sub>3</sub>, major isomer)  $\delta$  171.35, 158.95, 137.95, 132.10, 130.62, 130.11, 128.86, 128.33, 127.92, 127.49, 127.47, 122.45, 120.94, 116.91, 113.22, 64.98, 55.02, 53.79, 51.20, 51.09, 47.47, 44.21, 27.47; Yield: 83%, d.r. 20:1, White solid, m.p.= 288-290°C; **HRMS-EI (m/z)**: calc'd for C<sub>26</sub>H<sub>24</sub>N<sub>2</sub>O<sub>2</sub> [M+H]<sup>+</sup> 395.1755; found, 395.1759.

**3-methyl-2-oxo-13-(*p*-tolyl)-2,3,8,12b-tetrahydro-1,8-methanodibenzo[*e,h*]indole-1(7*aH*)-carbonitrile (10):**

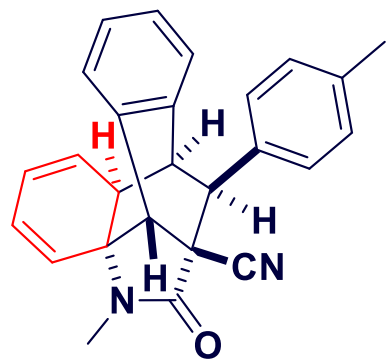

A clean vial (5 mL) equipped with a magnetic stir bar were added to **1h** (0.2 mmol), 4CzIPN (2.5 mol%) and 2-MeTHF (3.0 mL) at room temperature, and then placed at a distance of approx. 3 cm from a 24 W blue LED, and the solution was stirred at room temperature under visible-light irradiation for 6-24 h. The progress of the reaction was monitored by thin layer chromatography. When the reaction was complete, the solvent was removed under reduced pressure. The residue was purified by column chromatography on silica gel eluting with

Hex/EA = 80:20-60:40 to afford the dearomative cyclization product **10** derivatives. <sup>1</sup>H **NMR** (597 MHz, CDCl<sub>3</sub>, major isomer)  $\delta$  7.45 (d, *J* = 7.1 Hz, 1H), 7.39-7.35 (m, 1H), 7.30 (td, *J* = 7.5, 1.2 Hz, 1H), 6.94-6.91 (m, 1H), 6.88 (d, *J* = 8.1 Hz, 2H), 6.26 (d, *J* = 8.1 Hz, 2H), 5.82 (dd, *J* = 9.8, 5.6 Hz, 1H), 5.40 (ddd, *J* = 8.9, 5.7, 2.7 Hz, 1H), 5.32-5.26 (m, 2H), 3.69 (d, *J* = 2.5 Hz, 1H), 3.57 (s, 1H), 3.37 (t, *J* = 2.8 Hz, 1H), 3.18 (dd, *J* = 5.9, 3.0 Hz, 1H), 2.97 (s, 3H), 2.22 (s, 3H); <sup>13</sup>C **NMR** (150 MHz, CDCl<sub>3</sub>, major isomer)  $\delta$  171.36, 137.96, 137.42, 135.43, 132.11, 128.87, 128.85, 128.59, 128.29, 127.91, 127.46, 127.45, 122.48, 120.94, 116.88, 65.00, 53.82, 51.50, 51.05, 47.36, 44.24, 27.46, 20.95; Yield: 82%, d.r. 20:1, White solid, m.p.= 279-281 °C; **HRMS-EI(m/z)**: calc'd for C<sub>26</sub>H<sub>22</sub>N<sub>2</sub>ONa [M+Na]<sup>+</sup>, 401.1630; found, 401.1625.

### 13-(4-chlorophenyl)-3-methyl-2-oxo-2,3,8,12b-tetrahydro-1,8-methanodibenzo[*e,h*]indole-1(7*aH*)-

**carbonitrile (11):** A clean vial (5 mL) equipped with a magnetic stir bar were added to **1i** (0.2 mmol), 4CzIPN (2.5 mol%) and 2-MeTHF (3.0 mL) at room temperature, and then placed at a distance of approx. 3 cm from a 24 W blue LED, and the solution was stirred at room temperature under visible-light irradiation for 6-24 h. The progress of the reaction was monitored by thin layer chromatography. When the reaction was complete, the solvent was removed under reduced pressure. The residue was purified by column chromatography on silica gel eluting with Hex/EA = 80:20-

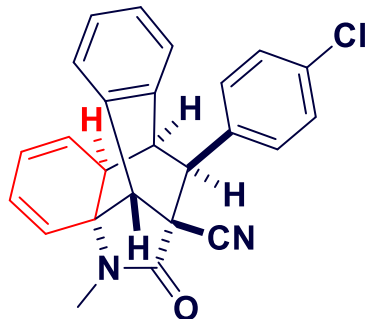

60:40 to afford the dearomative cyclization product **11** derivatives. **<sup>1</sup>H NMR** (400 MHz, CDCl<sub>3</sub>, major isomer) δ 7.47 (d, *J* = 7.1 Hz, 1H), 7.39 (td, *J* = 7.5, 1.1 Hz, 1H), 7.32 (td, *J* = 7.5, 1.2 Hz, 1H), 7.05 (d, *J* = 8.6 Hz, 2H), 6.90 (d, *J* = 7.2 Hz, 1H), 6.29 (d, *J* = 8.5 Hz, 2H), 5.84 (dd, *J* = 9.7, 5.6 Hz, 1H), 5.46-5.37 (m, 1H), 5.35-5.24 (m, 2H), 3.72 (d, *J* = 2.4 Hz, 1H), 3.59 (s, 1H), 3.35 (t, *J* = 2.6 Hz, 1H), 3.19 (d, *J* = 2.8 Hz, 1H), 2.98 (s, 3H); **<sup>13</sup>C NMR** (100 MHz, CDCl<sub>3</sub>, major isomer) δ 171.03, 137.41, 136.80, 133.79, 131.98, 130.31, 128.62, 128.51, 128.11, 128.04, 127.74, 127.51, 122.33, 121.11, 116.69, 64.98, 53.66, 51.09, 50.78, 47.16, 44.15, 27.54; Yield: 75%, d.r. 20:1, Off-white solid, m.p.= 303-305 °C; **HRMS-EI (m/z):** calc'd for C<sub>25</sub>H<sub>19</sub>ClN<sub>2</sub>ONa [M+Na]<sup>+</sup> 421.1084; found, 421.1080.

### 13-(4-cyanophenyl)-3-methyl-2-oxo-2,3,8,12b-tetrahydro-1,8-methanodibenzo[*e,h*]indole-1(7*aH*)-

**carbonitrile (12):** A clean vial (5 mL) equipped with a magnetic stir bar were added to **1j** (0.2 mmol), 4CzIPN (2.5 mol%) and 2-MeTHF (3.0 mL) at room temperature, and then placed at a distance of approx. 3 cm from a 24 W blue LED, and the solution was stirred at room temperature under visible-light irradiation for 6-24 h. The progress of the reaction was monitored by thin layer chromatography. When the reaction was complete, the solvent was removed under reduced pressure. The residue was purified by column chromatography on silica gel eluting with Hex/EA = 80:20-

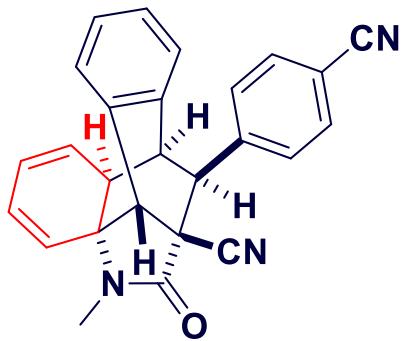

60:40 to afford the dearomative cyclization product **12** derivatives. **<sup>1</sup>H NMR** (400 MHz, CDCl<sub>3</sub>, major isomer) δ 7.49 (d, *J* = 7.1 Hz, 1H), 7.45-7.29 (m, 4H), 6.88 (d, *J* = 7.3 Hz, 1H), 6.48 (d, *J* = 8.3 Hz, 2H), 5.85 (dd, *J* = 9.7, 5.6 Hz, 1H), 5.42 (dd, *J* = 5.7, 2.6 Hz, 1H), 5.36 – 5.21 (m, 2H), 3.80 (d, *J* = 2.4 Hz, 1H), 3.62 (s, 1H), 3.37 (t, *J* = 2.6 Hz, 1H), 3.21 (d, *J* = 2.8 Hz, 1H), 2.98 (s, 3H); **<sup>13</sup>C NMR** (100 MHz, CDCl<sub>3</sub>, major isomer) δ 170.64, 143.36, 136.92, 131.87, 131.67, 129.78, 128.68, 128.31, 128.15, 128.01, 127.43, 122.16, 121.29, 118.34, 116.48, 111.79, 64.99, 53.49, 51.49, 50.40, 46.79, 44.10, 27.57; Yield: 73%, d.r. 20:1, Off-white solid, m.p.= 275-277 °C; **HRMS-EI (m/z):** calc'd for C<sub>26</sub>H<sub>19</sub>N<sub>3</sub>ONa [M+Na]<sup>+</sup> 412.1425; found, 412.1418.

**3-methyl-13-(3-nitrophenyl)-2-oxo-2,3,8,12b-tetrahydro-1,8-methanodibenzo[*e,h*]indole-1(7*aH*)-**

**carbonitrile (13):** A clean vial (5 mL) equipped with a magnetic stir bar were added to **1k** (0.2 mmol), 4CzIPN (2.5 mol%) and 2-MeTHF (3.0 mL) at room temperature, and then placed at a distance of approx. 3 cm from a 24 W blue LED, and the solution was stirred at room temperature under visible-light irradiation for 6-24 h. The progress of the reaction was monitored by thin layer chromatography. When the reaction was complete, the solvent was removed under reduced pressure. The residue was purified by column chromatography on silica gel eluting with Hex/EA = 80:20-60:40 to afford the dearomative cyclization product **13** derivatives. **<sup>1</sup>H NMR**

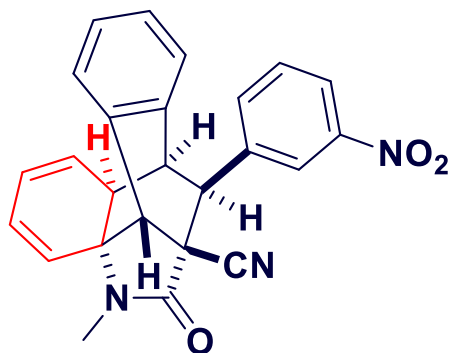

(400 MHz, CDCl<sub>3</sub>, major isomer) δ 8.04 (dd, *J* = 8.2, 1.6 Hz, 1H), 7.53 (d, *J* = 6.6 Hz, 1H), 7.48-7.41 (m, 2H), 7.35 (td, *J* = 7.5, 1.3 Hz, 1H), 7.23 (d, *J* = 8.0 Hz, 1H), 6.89 (d, *J* = 7.2 Hz, 1H), 6.56 (d, *J* = 7.6 Hz, 1H), 5.87 (dd, *J* = 9.8, 5.4 Hz, 1H), 5.50-5.41 (m, 1H), 5.38-5.25 (m, 2H), 3.89 (d, *J* = 2.0 Hz, 1H), 3.64 (s, 1H), 3.42 (s, 1H), 3.24 (d, *J* = 2.5 Hz, 1H), 3.00 (s, 3H); **<sup>13</sup>C NMR** (100 MHz, CDCl<sub>3</sub>, major isomer) δ 170.64, 147.66, 140.12, 136.79, 135.05, 131.88, 128.82, 128.35, 128.31, 128.19, 127.46, 124.20, 122.92, 122.22, 121.34, 116.44, 65.02, 53.56, 51.19, 50.61, 46.87, 44.12, 27.61; Yield: 60%, d.r. 20:1, Off-white solid, m.p.= 307-309 °C; **HRMS-EI** (*m/z*): calc'd for C<sub>25</sub>H<sub>19</sub>N<sub>3</sub>O<sub>3</sub>Na [M+Na]<sup>+</sup> 432.1323; found, 432.1320.

**3-methyl-13-(naphthalen-2-yl)-2-oxo-2,3,8,12b-tetrahydro-1,8-methanodibenzo[*e,h*]indole-1(7*aH*)-**

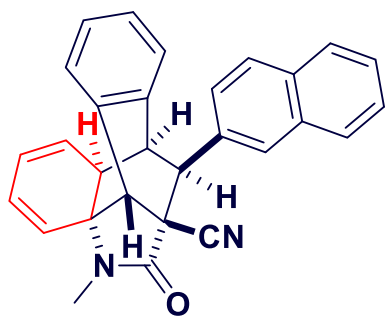

**carbonitrile (14):** A clean vial (5 mL) equipped with a magnetic stir bar were added to **1l** (0.2 mmol), 4CzIPN (2.5 mol%) and 2-MeTHF (3.0 mL) at room temperature, and then placed at a distance of approx. 3 cm from a 24 W blue LED, and the solution was stirred at room temperature under visible-light irradiation for 6-24 h. The progress of the reaction was monitored by thin layer chromatography. When the reaction was complete, the solvent was removed

under reduced pressure. The residue was purified by column chromatography on silica gel eluting with Hex/EA = 80:20-60:40 to afford the dearomative cyclization product **14** derivatives. **<sup>1</sup>H NMR** (400 MHz, CDCl<sub>3</sub>, major isomer) δ 7.70 (dd, *J* = 6.2, 3.1 Hz, 1H), 7.54 (ddd, *J* = 10.9, 7.6, 4.0 Hz, 3H), 7.46-7.35 (m, 3H), 7.31 (td, *J* = 7.5, 1.2 Hz, 1H), 7.02 (s, 1H), 6.88 (d, *J* = 7.3 Hz, 1H), 6.30 (d, *J* = 7.3 Hz, 1H), 5.85 (dd, *J* = 9.7, 5.4 Hz, 1H), 5.48-5.39 (m, 1H), 5.38-5.26 (m, 2H), 3.92 (d, *J* = 2.3 Hz, 1H), 3.64 (s, 1H), 3.45 (s, 1H), 3.24 (d, *J* = 2.9 Hz, 1H), 3.01 (s, 3H); **<sup>13</sup>C NMR** (100 MHz, CDCl<sub>3</sub>, major isomer) δ 171.32, 137.93, 135.87, 132.76, 132.69, 132.16, 128.81, 128.49, 128.43, 128.07, 128.02, 127.97, 127.62, 127.57, 127.40, 127.36, 126.58, 126.07, 125.92, 122.48, 121.08, 116.86, 65.06, 53.86, 51.95, 50.94, 47.46, 44.28, 27.57; Yield: 74%, d.r. 20:1, White solid, m.p.= 318-320 °C; **HRMS-EI** (*m/z*): calc'd for C<sub>29</sub>H<sub>22</sub>N<sub>2</sub>ONa [M+Na]<sup>+</sup> 437.1630; found, 437.1625.

### 13-(4-(methoxymethyl)phenyl)-3-methyl-2-oxo-2,3,8,12b-tetrahydro-1,8-methanodibenzo[*e,h*]indole-

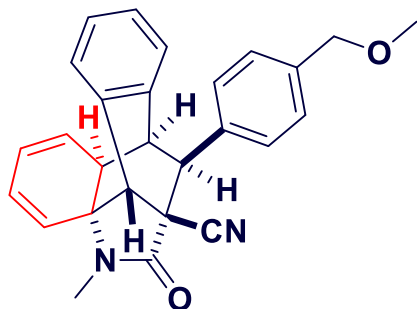

**1(7aH)-carbonitrile (15):** A clean vial (5 mL) equipped with a magnetic stir bar were added to **1m** (0.2 mmol), 4CzIPN (2.5 mol%) and 2-MeTHF (3.0 mL) at room temperature, and then placed at a distance of approx. 3 cm from a 24 W blue LED, and the solution was stirred at room temperature under visible-light irradiation for 6-24 h. The progress of the reaction was monitored by thin layer chromatography. When the reaction was complete, the solvent was removed under reduced pressure. The residue was purified by column

chromatography on silica gel eluting with Hex/EA = 80:20-60:40 to afford the dearomative cyclization product **15** derivatives. **<sup>1</sup>H NMR** (400 MHz, CDCl<sub>3</sub>, major isomer)  $\delta$  7.45 (s, 1H), 7.38 (d,  $J$  = 1.2 Hz, 1H), 7.30 (d,  $J$  = 1.3 Hz, 1H), 7.05 (d,  $J$  = 8.3 Hz, 2H), 6.90 (d,  $J$  = 7.2 Hz, 1H), 6.36 (d,  $J$  = 8.2 Hz, 2H), 5.83 (dd,  $J$  = 9.7, 5.5 Hz, 1H), 5.44 – 5.37 (m, 1H), 5.33 – 5.25 (m, 2H), 4.33 (s, 2H), 3.73 (d,  $J$  = 2.5 Hz, 1H), 3.58 (s, 1H), 3.37 (t,  $J$  = 2.8 Hz, 1H), 3.33 (s, 3H), 3.19 (dd,  $J$  = 5.9, 3.0 Hz, 1H), 2.98 (d,  $J$  = 3.3 Hz, 3H). **<sup>13</sup>C NMR** (100 MHz, CDCl<sub>3</sub>, major isomer)  $\delta$  171.29, 137.76, 137.71, 132.03, 129.05, 128.81, 128.38, 127.96, 127.93, 127.53, 127.22, 122.45, 121.00, 116.80, 74.20, 65.01, 58.16, 53.80, 51.56, 50.92, 47.28, 44.22, 27.50. Yield: 79%, d.r. 20:1, White solid, m.p.= 318-320 °C; **HRMS-EI (m/z):** calc'd for C<sub>27</sub>H<sub>25</sub>N<sub>2</sub>O<sub>2</sub> [M+H]<sup>+</sup> 431.1735; found, 431.1732.

### 3-methyl-2-oxo-13-(4-(phenoxyethyl)phenyl)-2,3,8,12b-tetrahydro-1,8-methanodibenzo[*e,h*]indole-

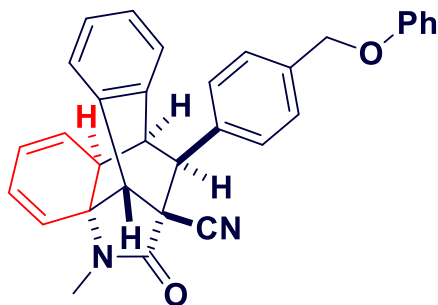

**1(7aH)-carbonitrile (16):** A clean vial (5 mL) equipped with a magnetic stir bar were added to **1n** (0.2 mmol), 4CzIPN (2.5 mol%) and 2-MeTHF (3.0 mL) at room temperature, and then placed at a distance of approx. 3 cm from a 24 W blue LED, and the solution was stirred at room temperature under visible-light irradiation for 6-24 h. The progress of the reaction was monitored by thin layer chromatography. When the reaction was complete, the solvent was removed under reduced pressure. The residue was purified

by column chromatography on silica gel eluting with Hex/EA = 80:20-60:40 to afford the dearomative cyclization product **16** derivatives. **<sup>1</sup>H NMR** (400 MHz, CDCl<sub>3</sub>, major isomer)  $\delta$  7.47 (d,  $J$  = 6.8 Hz, 1H), 7.38 (td,  $J$  = 7.5, 1.3 Hz, 1H), 7.33 – 7.25 (m, 3H), 7.15 (d,  $J$  = 8.4 Hz, 2H), 6.98 – 6.88 (m, 4H), 6.40 (d,  $J$  = 8.2 Hz, 2H), 5.83 (dd,  $J$  = 9.7, 5.3 Hz, 1H), 5.45 – 5.38 (m, 1H), 5.33 – 5.25 (m, 2H), 4.93 (s, 2H), 3.75 (d,  $J$  = 2.5 Hz, 1H), 3.59 (s, 1H), 3.39 (t,  $J$  = 2.8 Hz, 1H), 3.19 (dd,  $J$  = 5.9, 3.0 Hz, 1H), 2.98 (s, 3H). **<sup>13</sup>C NMR** (100 MHz, CDCl<sub>3</sub>, major isomer)  $\delta$  171.25, 158.68, 138.02, 137.71, 136.58, 132.03, 129.40, 129.21, 128.77, 128.41, 127.97, 127.95, 127.57, 127.53, 126.98, 122.41, 121.02, 120.89, 116.80, 114.74, 69.43, 65.02, 53.76, 51.54, 50.92, 47.19, 44.22, 27.50; Yield: 80%, d.r. 20:1, White solid, m.p.= 310-312 °C; **HRMS-EI (m/z):** calc'd for C<sub>32</sub>H<sub>26</sub>N<sub>2</sub>O<sub>2</sub>Na [M+Na]<sup>+</sup> 493.1889; found, 493.1885.

#### 4-ethyl-1-cyano-3-methyl-2-oxo-1,2,3,7a,8,12b-hexahydro-1,8-methanodibenzo[e,h]indol-13-yl)benzoate

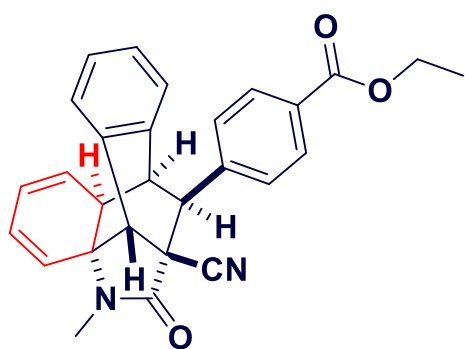

**(17):** A clean vial (5 mL) equipped with a magnetic stir bar were added to **1o** (0.2 mmol), 4CzIPN (2.5 mol%) and 2-MeTHF (3.0 mL) at room temperature, and then placed at a distance of approx. 3 cm from a 24 W blue LED, and the solution was stirred at room temperature under visible-light irradiation for 6-24 h. The progress of the reaction was monitored by thin layer chromatography. When the reaction was complete, the solvent was removed under reduced pressure. The residue was purified by column

chromatography on silica gel eluting with Hex/EA = 80:20-60:40 to afford the dearomative cyclization product **17** derivatives. **<sup>1</sup>H NMR** (400 MHz, CDCl<sub>3</sub>, major isomer) δ 7.76 (d, *J* = 8.6 Hz, 2H), 7.48 (d, *J* = 7.2 Hz, 1H), 7.40 (td, *J* = 7.5, 1.2 Hz, 1H), 7.31 (td, *J* = 7.5, 1.2 Hz, 1H), 6.87 (d, *J* = 7.3 Hz, 1H), 6.45 (d, *J* = 8.4 Hz, 2H), 5.84 (dd, *J* = 9.7, 5.6 Hz, 1H), 5.47 – 5.38 (m, 1H), 5.36 – 5.24 (m, 2H), 4.30 (qd, *J* = 7.1, 1.9 Hz, 2H), 3.81 (d, *J* = 2.5 Hz, 1H), 3.61 (s, 1H), 3.38 (t, *J* = 2.7 Hz, 1H), 3.25 – 3.17 (m, 1H), 3.00 (d, *J* = 9.8 Hz, 3H), 1.33 (t, *J* = 7.1 Hz, 3H); **<sup>13</sup>C NMR** (100 MHz, CDCl<sub>3</sub>, major isomer) δ 170.98, 166.10, 143.08, 137.35, 131.94, 129.87, 129.13, 129.01, 128.57, 128.52, 128.04, 128.03, 127.75, 127.47, 122.31, 121.13, 116.62, 77.31, 76.99, 76.67, 65.00, 60.86, 53.65, 51.53, 50.56, 47.01, 44.13, 27.54, 14.23. Yield: 86%, d.r. 20:1, White solid, m.p.= 318-320 °C; **HRMS-EI (m/z):** calc'd for C<sub>28</sub>H<sub>25</sub>N<sub>2</sub>O<sub>3</sub> [M+H]<sup>+</sup> 437.1867; found, 437.1869.

#### 13-(4-((1,3-dioxoisindolin-2-yl)methyl)phenyl)-3-methyl-2-oxo-2,3,8,12b-tetrahydro-1,8-

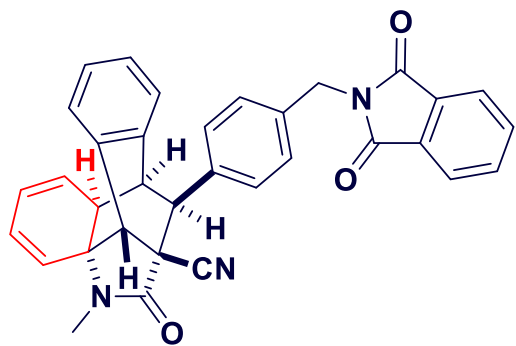

**methanodibenzo[e,h]indole-1(7aH)-carbonitrile (18):** A clean vial (5 mL) equipped with a magnetic stir bar were added to **1p** (0.2 mmol), 4CzIPN (2.5 mol%) and 2-MeTHF (3.0 mL) at room temperature, and then placed at a distance of approx. 3 cm from a 24 W blue LED, and the solution was stirred at room temperature under visible-light irradiation for 6-24 h. The progress of the reaction was monitored by thin layer chromatography. When the reaction was complete, the solvent was removed under reduced pressure. The residue was purified

by column chromatography on silica gel eluting with Hex/EA = 80:20-60:40 to afford the dearomative cyclization product **18** derivatives. **<sup>1</sup>H NMR** (400 MHz, CDCl<sub>3</sub>, major isomer) δ 7.82 (dt, *J* = 7.0, 3.5 Hz, 2H), 7.70 (td, *J* = 5.3, 2.1 Hz, 2H), 7.45 (d, *J* = 7.2 Hz, 1H), 7.37 (td, *J* = 7.5, 1.2 Hz, 1H), 7.30 (td, *J* = 7.5, 1.3 Hz, 1H), 7.14 (d, *J* = 8.4 Hz, 2H), 6.89 (d, *J* = 7.0 Hz, 1H), 6.33 (d, *J* = 8.2 Hz, 2H), 5.82 (dd, *J* = 9.8, 5.6 Hz, 1H), 5.45 – 5.35 (m, 1H), 5.33 – 5.20 (m, 2H), 4.72 (q, *J* = 14.7 Hz, 2H), 3.71 (d, *J* = 2.4 Hz, 1H), 3.56 (s, 1H), 3.34 (t, *J* = 2.7 Hz, 1H), 3.20 – 3.14 (m, 1H), 2.95 (d, *J* = 8.5 Hz, 3H); **<sup>13</sup>C NMR** (100 MHz, CDCl<sub>3</sub>, major isomer) δ 171.19, 167.91, 137.91, 137.59, 135.80, 133.92, 132.00, 131.91, 129.30, 128.74, 128.47, 128.18, 127.95, 127.91, 127.54, 127.48,

123.30, 122.37, 120.98, 116.72, 64.97, 53.68, 51.43, 50.82, 47.08, 44.16, 41.02, 27.48. Yield: 66%, d.r. 20:1, White solid, m.p.= 281-283 °C; **HRMS-EI (m/z)**: calc'd for C<sub>34</sub>H<sub>25</sub>N<sub>3</sub>O<sub>3</sub>Na [M+Na]<sup>+</sup> 546.1793; found, 546.1786.

**3-methyl-13-(4-(((8R,9S,13S,14S)-13-methyl-17-oxo-7,8,9,11,12,13,14,15,16,17-decahydro-6H-**

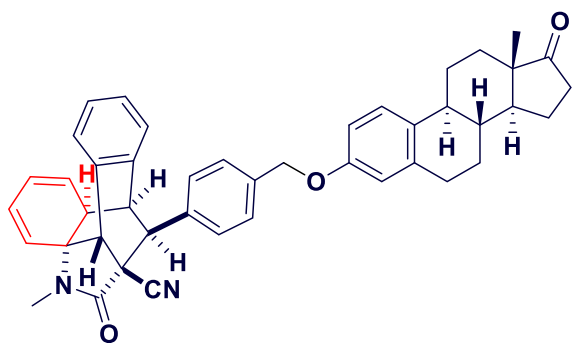

**cyclopenta[a]phenanthren-3-yl)oxy)methyl)phenyl)-2-oxo-2,3,8,12b-tetrahydro-1,8-methanodibenzo[e,h]indole-1(7aH)-carbonitrile (19):** A clean vial (5 mL) equipped with a magnetic stir bar were added to **1q** (0.2 mmol), 4CzIPN (2.5 mol%) and 2-MeTHF (3.0 mL) at room temperature, and then placed at a distance of approx. 3 cm from a 24 W blue LED, and the solution was stirred at room temperature under visible-light irradiation for

6-24 h. The progress of the reaction was monitored by thin layer chromatography. When the reaction was complete, the solvent was removed under reduced pressure. The residue was purified by column chromatography on silica gel eluting with Hex/EA = 80:20-60:40 to afford the dearomative cyclization product **19** derivatives. **<sup>1</sup>H NMR** (400 MHz, CDCl<sub>3</sub>, mixture of diastereomers,) δ 7.47 (d, *J* = 7.4 Hz, 1H), 7.39 (td, *J* = 7.5, 1.3 Hz, 1H), 7.31 (ddd, *J* = 5.4, 4.6, 2.0 Hz, 1H), 7.16 (dd, *J* = 14.4, 8.5 Hz, 3H), 6.93 (d, *J* = 7.3 Hz, 1H), 6.73 (dd, *J* = 8.6, 2.7 Hz, 1H), 6.66 (d, *J* = 2.6 Hz, 1H), 6.40 (d, *J* = 8.2 Hz, 1H), 5.84 (dd, *J* = 9.7, 5.2 Hz, 1H), 5.41 (ddd, *J* = 8.4, 4.2, 1.7 Hz, 1H), 5.35 – 5.25 (m, 2H), 4.91 (s, 2H), 4.12 (d, *J* = 3.0 Hz, 1H), 3.75 (d, *J* = 2.5 Hz, 1H), 3.59 (s, 1H), 3.39 (t, *J* = 2.8 Hz, 1H), 3.20 (d, *J* = 2.9 Hz, 1H), 3.00 (d, *J* = 12.9 Hz, 2H), 2.87 (dd, *J* = 9.7, 5.1 Hz, 2H), 2.56 – 2.32 (m, 2H), 2.24 (s, 1H), 2.18 – 1.88 (m, 6H), 1.66 – 1.38 (m, 11H), 1.31 – 1.24 (m, 6H), 0.90 (s, 3H). **<sup>13</sup>C NMR** (101 MHz, CDCl<sub>3</sub>, mixture of diastereomers) δ 221.04, 171.29, 156.75, 137.94, 137.74, 137.72, 136.79, 132.28, 132.02, 129.20, 128.78, 128.42, 127.99, 127.96, 127.58, 127.54, 126.93, 126.29, 124.74, 123.97, 123.44, 122.41, 121.03, 116.78, 115.85, 114.75, 112.38, 69.50, 65.04, 53.77, 51.55, 50.94, 50.38, 47.99, 47.21, 44.24, 43.95, 38.29, 35.85, 34.70, 34.27, 31.89, 31.59, 31.54, 30.26, 29.66, 29.62, 29.59, 27.51, 26.49, 25.86, 21.55, 14.09, 13.82. Yield: 57%, d.r. 4:1, White solid, m.p.= 256-258 °C; **HRMS-EI (m/z)**: calc'd for C<sub>44</sub>H<sub>42</sub>N<sub>2</sub>O<sub>3</sub>Na [M+Na]<sup>+</sup> 669.3085; found, 669.3082.

**4-phenyl-1-cyano-3-methyl-2-oxo-1,2,3,7a,8,12b-hexahydro-1,8-methanodibenzo[e,h]indol-13-yl)benzoate**

**(20):** A clean vial (5 mL) equipped with a magnetic stir bar were added to **1r** (0.2 mmol), 4CzIPN (2.5 mol%)

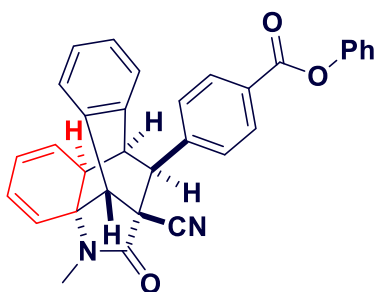

and 2-MeTHF (3.0 mL) at room temperature, and then placed at a distance of approx. 3 cm from a 24 W blue LED, and the solution was stirred at room temperature under visible-light irradiation for 6-24 h. The progress of the reaction was monitored by thin layer chromatography. When the reaction was complete, the solvent was removed under reduced pressure. The residue was purified by column chromatography on silica gel eluting with Hex/EA = 80:20-60:40 to

afford the dearomative cyclization product **20** derivatives. **<sup>1</sup>H NMR** (400 MHz, CDCl<sub>3</sub>, major isomer) δ 7.93 (d,

$J = 8.7$  Hz, 2H), 7.50 (d,  $J = 6.9$  Hz, 1H), 7.46 – 7.31 (m, 4H), 7.29 – 7.21 (m, 1H), 7.18 – 7.11 (m, 2H), 6.91 (d,  $J = 7.3$  Hz, 1H), 6.52 (d,  $J = 8.4$  Hz, 2H), 5.86 (dd,  $J = 9.8, 5.4$  Hz, 1H), 5.48 – 5.38 (m, 1H), 5.36 – 5.26 (m, 2H), 3.86 (d,  $J = 2.5$  Hz, 1H), 3.63 (s, 1H), 3.41 (t,  $J = 2.8$  Hz, 1H), 3.23 (dd,  $J = 5.9, 3.0$  Hz, 1H), 3.01 (d,  $J = 4.1$  Hz, 3H);  $^{13}\text{C}$  NMR (100 MHz,  $\text{CDCl}_3$ , major isomer)  $\delta$  170.90, 164.67, 150.78, 143.91, 137.27, 131.92, 129.78, 129.42, 129.27, 128.94, 128.61, 128.52, 128.10, 127.86, 127.48, 125.82, 122.28, 121.60, 121.19, 116.64, 77.31, 76.99, 76.67, 65.00, 53.60, 51.55, 50.54, 46.96, 44.13, 27.58; Yield: 84%, d.r. 20:1, White solid, m.p. = 242-244 °C; HRMS-EI ( $m/z$ ): calc'd for  $\text{C}_{32}\text{H}_{24}\text{N}_2\text{O}_3\text{Na}$   $[\text{M}+\text{Na}]^+$  507.1684; found, 507.1680.

**3-methyl-2-oxo-13-(pyridin-2-yl)-2,3,8,12b-tetrahydro-1,8-methanodibenzo[*e,h*]indole-1(7*aH*)-carbonitrile**

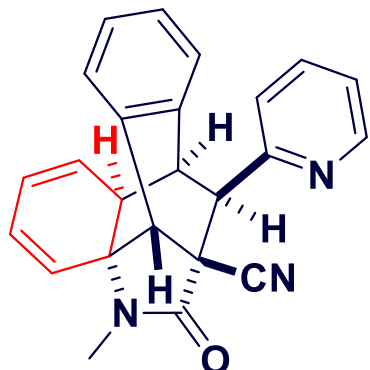

**(21):** A clean vial (5 mL) equipped with a magnetic stir bar were added to **1s** (0.2 mmol), 4CzIPN (2.5 mol%) and 2-MeTHF (3.0 mL) at room temperature, and then placed at a distance of approx. 3 cm from a 24 W blue LED, and the solution was stirred at room temperature under visible-light irradiation for 6-24 h. The progress of the reaction was monitored by thin layer chromatography. When the reaction was complete, the solvent was removed under reduced pressure. The residue was purified by column chromatography on silica gel eluting with Hex/EA = 80:20-60:40 to afford the dearomative cyclization

product **21** derivatives.  $^1\text{H}$  NMR (400 MHz,  $\text{CDCl}_3$ , major isomer)  $\delta$  8.42 (s, 1H), 7.47 (d,  $J = 7.2$  Hz, 1H), 7.40 – 7.23 (m, 3H), 7.08 (dd,  $J = 6.8, 4.8$  Hz, 1H), 6.83 (d,  $J = 7.3$  Hz, 1H), 5.92 – 5.79 (m, 2H), 5.46 – 5.38 (m, 1H), 5.35 – 5.24 (m, 2H), 4.10 (d,  $J = 2.3$  Hz, 1H), 3.60 (s, 1H), 3.51 (t,  $J = 2.5$  Hz, 1H), 3.22 (dd,  $J = 5.8, 3.0$  Hz, 1H), 2.97 (s, 3H);  $^{13}\text{C}$  NMR (100 MHz,  $\text{CDCl}_3$ , major isomer)  $\delta$  170.82, 157.45, 148.84, 137.60, 135.54, 132.03, 128.81, 128.28, 128.00, 127.90, 127.51, 127.13, 123.10, 122.61, 122.44, 121.04, 116.96, 65.02, 53.80, 53.40, 49.44, 46.04, 43.79, 27.53; Yield: 64%, d.r. 20:1, Off-White solid, m.p.= 292-294 °C; HRMS-EI ( $m/z$ ): calc'd for  $\text{C}_{24}\text{H}_{20}\text{N}_3\text{O}$   $[\text{M}+\text{H}]^+$  366.4360; found, 366.4362.

**1-acetyl-3-methyl-13-phenyl-1,7a,8,12b-tetrahydro-1,8-methanodibenzo[*e,h*]indol-2(3*H*)-one (22):** A clean vial (5 mL) equipped with a magnetic stir bar were added to **1t** (0.2 mmol), 4CzIPN (2.5 mol%) and 2-MeTHF

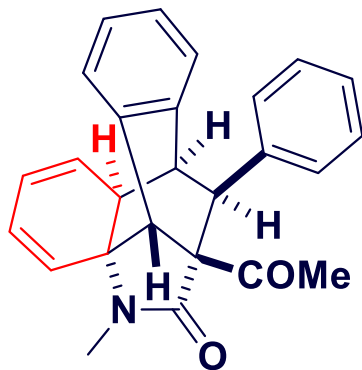

(3.0 mL) at room temperature, and then placed at a distance of approx. 3 cm from a 24 W blue LED, and the solution was stirred at room temperature under visible-light irradiation for 6-24 h. The progress of the reaction was monitored by thin layer chromatography. When the reaction was complete, the solvent was removed under reduced pressure. The residue was purified by column chromatography on silica gel eluting with Hex/EA = 80:20-60:40 to afford the dearomative cyclization product **22** derivatives.  $^1\text{H}$  NMR (400 MHz,  $\text{CDCl}_3$ ,

mixture of diastereomers)  $\delta$  9.33 (s, 1H), 8.03 (d,  $J = 7.4$  Hz, 1H), 7.42 (ddd,  $J = 8.5, 6.1, 2.1$  Hz, 3H), 7.38 – 7.30 (m, 2H), 7.25 – 7.15 (m, 6H), 7.09 – 6.95 (m, 11H), 6.76 (q,  $J = 12.1$  Hz, 2H), 6.59 (d,  $J = 12.2$  Hz, 1H),

6.48 – 6.40 (m, 2H), 6.32 (d,  $J = 12.1$  Hz, 1H), 5.83 (d,  $J = 6.9$  Hz, 2H), 4.10 (dd,  $J = 11.2, 6.4$  Hz, 1H), 3.62 (s, 3H), 3.22 (dd,  $J = 17.8, 11.3$  Hz, 1H), 2.55 (s, 3H), 2.31 (dd,  $J = 18.1, 6.3$  Hz, 1H), 1.55 (s, 2H);  $^{13}\text{C}$  NMR (100 MHz,  $\text{CDCl}_3$ , mixture of diastereomers)  $\delta$  205.79, 169.16, 162.81, 160.70, 141.28, 138.56, 137.89, 137.75, 136.34, 136.27, 136.04, 136.02, 133.74, 131.81, 131.16, 130.48, 129.91, 129.36, 129.30, 129.03, 128.83, 128.76, 128.68, 128.25, 128.11, 127.69, 127.63, 127.51, 127.45, 127.03, 124.62, 123.46, 120.50, 119.47, 111.21, 65.68, 55.30, 41.50, 38.54, 30.53, 29.33; Yield: 68%, d.r. 1:1, White solid, m.p.= 256-258 °C; **HRMS-EI (m/z)**: calc'd for  $\text{C}_{26}\text{H}_{23}\text{NO}_2\text{Na}$   $[\text{M}+\text{Na}]^+$  404.1626; found, 404.1624.

**3-ethyl-2-oxo-13-phenyl-2,3,8,12b-tetrahydro-1,8-methanodibenzo[e,h]indole-1(7aH)-carbonitrile (23):** A

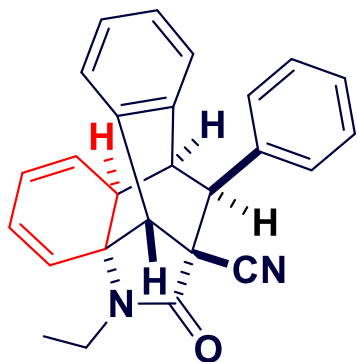

clean vial (5 mL) equipped with a magnetic stir bar were added to **1u** (0.2 mmol), (4CzIPN (2.5 mol%) and 2-MeTHF (3.0 mL) at room temperature, and then placed at a distance of approx. 3 cm from a 24 W blue LED, and the solution was stirred at room temperature under visible-light irradiation for 6-24 h. The progress of the reaction was monitored by thin layer chromatography. When the reaction was complete, the solvent was removed under reduced pressure. The residue was purified by column chromatography on silica gel eluting with Hex/EA = 80:20-60:40 to afford the dearomative cyclization product **23** derivatives.  $^1\text{H}$  NMR (597

MHz,  $\text{CDCl}_3$ , major isomer)  $\delta$  7.45 (d,  $J = 7.3$  Hz, 1H), 7.37 (td,  $J = 7.5, 1.1$  Hz, 1H), 7.30 (td,  $J = 7.5, 1.2$  Hz, 1H), 7.15 (dd,  $J = 10.6, 4.2$  Hz, 1H), 7.07 (t,  $J = 7.7$  Hz, 2H), 6.90 (d,  $J = 7.2$  Hz, 1H), 6.39 (d,  $J = 7.4$  Hz, 2H), 5.81 (dd,  $J = 9.8, 5.6$  Hz, 1H), 5.44-5.37 (m, 1H), 5.35 (d,  $J = 9.8$  Hz, 1H), 5.30-5.23 (m, 1H), 3.74 (d,  $J = 2.5$  Hz, 1H), 3.59 (s, 1H), 3.54 (dt,  $J = 14.2, 7.1$  Hz, 1H), 3.47-3.40 (m, 1H), 3.37 (t,  $J = 2.7$  Hz, 1H), 3.24 (dd,  $J = 5.9, 3.0$  Hz, 1H), 1.33 (t,  $J = 7.2$  Hz, 3H);  $^{13}\text{C}$  NMR (150 MHz,  $\text{CDCl}_3$ , major isomer)  $\delta$  171.41, 138.43, 137.76, 132.23, 129.00, 128.65, 128.29, 127.89, 127.86, 127.75, 127.71, 127.47, 122.95, 120.82, 116.97, 65.31, 54.25, 51.74, 51.01, 47.41, 46.56, 37.04, 14.79; Yield: 93%, d.r. 20:1, White solid, m.p.= 298-300°C; **HRMS-EI (m/z)**: calc'd for  $\text{C}_{26}\text{H}_{22}\text{N}_2\text{ONa}$   $[\text{M}+\text{Na}]^+$  401.1630; found, 401.1628.

**3,6-dimethyl-2-oxo-13-phenyl-2,3,8,12b-tetrahydro-1,8-methanodibenzo[e,h]indole-1(7aH)-carbonitrile**

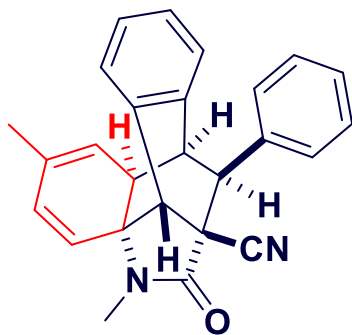

**(24):** A clean vial (5 mL) equipped with a magnetic stir bar were added to **1v** (0.2 mmol), 4CzIPN (2.5 mol%) and 2-MeTHF (3.0 mL) at room temperature, and then placed at a distance of approx. 3 cm from a 24 W blue LED, and the solution was stirred at room temperature under visible-light irradiation for 6-24 h. The progress of the reaction was monitored by thin layer chromatography. When the reaction was complete, the solvent was removed under reduced pressure. The residue was purified by column chromatography on silica gel eluting with Hex/EA

= 80:20-60:40 to afford the dearomative cyclization product **24** derivatives.  $^1\text{H}$  NMR (400 MHz,  $\text{CDCl}_3$ , major isomer)  $\delta$  7.44 (d,  $J = 7.1$  Hz, 1H), 7.35 (td,  $J = 7.5, 1.2$  Hz, 1H), 7.31 – 7.25 (m, 1H), 7.18 – 7.12 (m, 1H), 7.07

(t,  $J = 7.5$  Hz, 2H), 6.89 (d,  $J = 7.2$  Hz, 1H), 6.38 (d,  $J = 7.4$  Hz, 2H), 5.69 (dd,  $J = 9.8, 1.1$  Hz, 1H), 5.31 (d,  $J = 9.8$  Hz, 1H), 4.94 (d,  $J = 1.0$  Hz, 1H), 3.71 (d,  $J = 2.4$  Hz, 1H), 3.57 (s, 1H), 3.34 (t,  $J = 2.7$  Hz, 1H), 3.19 – 3.08 (m, 1H), 2.96 (s, 3H), 1.42 (s, 3H);  $^{13}\text{C}$  NMR (101 MHz,  $\text{CDCl}_3$ , major isomer)  $\delta$  171.41, 138.46, 137.96, 132.20, 131.90, 129.00, 128.31, 128.29, 127.85, 127.78, 127.72, 127.47, 127.36, 123.08, 122.48, 116.88, 64.65, 53.70, 51.71, 50.99, 47.67, 44.27, 27.44, 21.02; Yield: 89%, d.r. 20:1, White solid, m.p.= 296-298 °C; **HRMS-EI (m/z)**: calc'd for  $\text{C}_{26}\text{H}_{22}\text{N}_2\text{ONa}$   $[\text{M}+\text{Na}]^+$  401.1630; found, 401.1625.

**6-ethyl-3-methyl-2-oxo-13-phenyl-2,3,8,12b-tetrahydro-1,8-methanodibenzo[*e,h*]indole-1(7*aH*)-**

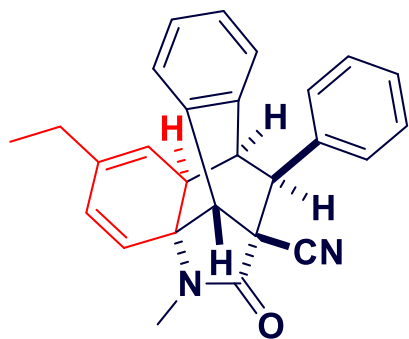

**carbonitrile (25):** A clean vial (5 mL) equipped with a magnetic stir bar were added to **1w** (0.2 mmol), 4CzIPN (2.5 mol%) and 2-MeTHF (3.0 mL) at room temperature, and then placed at a distance of approx. 3 cm from a 24 W blue LED, and the solution was stirred at room temperature under visible-light irradiation for 6-24 h. The progress of the reaction was monitored by thin layer chromatography. When the reaction was complete, the solvent was removed under reduced pressure. The residue was purified by column chromatography

on silica gel eluting with Hex/EA = 80:20-60:40 to afford the dearomative cyclization product **25** derivatives.  $^1\text{H}$  NMR (400 MHz,  $\text{CDCl}_3$ , major isomer)  $\delta$  7.43 (d,  $J = 7.3$  Hz, 1H), 7.34 (t,  $J = 7.4$  Hz, 1H), 7.29 (d,  $J = 7.3$  Hz, 1H), 7.16 (t,  $J = 7.3$  Hz, 1H), 7.08 (t,  $J = 7.6$  Hz, 2H), 6.89 (d,  $J = 7.2$  Hz, 1H), 6.41 (d,  $J = 7.5$  Hz, 2H), 5.71 (d,  $J = 9.8$  Hz, 1H), 5.32 (d,  $J = 9.8$  Hz, 1H), 4.89 (s, 1H), 3.72 (d,  $J = 2.4$  Hz, 1H), 3.56 (s, 1H), 3.36 (t,  $J = 2.7$  Hz, 1H), 3.16 (s, 1H), 2.97 (s, 3H), 1.75 – 1.66 (m, 2H), 0.63 (t,  $J = 7.4$  Hz, 3H);  $^{13}\text{C}$  NMR (101 MHz,  $\text{CDCl}_3$ , major isomer)  $\delta$  171.45, 138.52, 138.08, 134.32, 131.90, 131.36, 129.03, 128.21, 127.87, 127.73, 127.42, 127.25, 122.64, 121.74, 116.90, 65.01, 53.71, 51.65, 50.97, 47.73, 43.91, 27.99, 27.47, 12.39; Yield: 90%, d.r. 20:1, White solid, m.p.= 298-300°C; **HRMS-EI (m/z)**: calc'd for  $\text{C}_{27}\text{H}_{24}\text{N}_2\text{ONa}$   $[\text{M}+\text{Na}]^+$  415.1787; found, 415.1784.

**3,5-dimethyl-2-oxo-13-phenyl-2,3,8,12b-tetrahydro-1,8-methanodibenzo[*e,h*]indole-1(7*aH*)-carbonitrile**

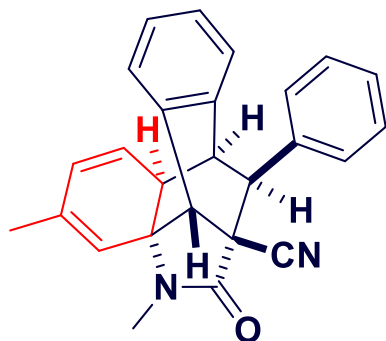

**(26):** A clean vial (5 mL) equipped with a magnetic stir bar were added to **1x** (0.2 mmol), 4CzIPN (2.5 mol%) and 2-MeTHF (3.0 mL) at room temperature, and then placed at a distance of approx. 3 cm from a 24 W blue LED, and the solution was stirred at room temperature under visible-light irradiation for 6-24 h. The progress of the reaction was monitored by thin layer chromatography. When the reaction was complete, the solvent was removed under reduced pressure. The residue was purified by column chromatography on silica gel

eluting with Hex/EA = 80:20-60:40 to afford the dearomative cyclization product **26** derivatives.  $^1\text{H}$  NMR (597 MHz,  $\text{CDCl}_3$ , mixture of diastereomers)  $\delta$  7.45 (dd,  $J = 16.2, 7.3$  Hz, 1H), 7.37 (dtd,  $J = 8.6, 7.5, 1.2$  Hz, 1H), 7.30 (tdd,  $J = 7.5, 4.8, 1.2$  Hz, 1H), 7.15 (dd,  $J = 15.6, 7.4$  Hz, 1H), 7.08 (dd,  $J = 16.0, 8.3$  Hz, 2H), 6.96 (d,  $J =$

7.3 Hz, 1H), 6.89 (d,  $J$  = 7.2 Hz, 1H), 6.38 (t,  $J$  = 8.6 Hz, 2H), 5.79 (dd,  $J$  = 9.8, 5.9 Hz, 1H), 5.32 – 5.25 (m, 1H), 5.24 – 5.19 (m, 1H), 5.01 (s, 1H), 3.71 (dd,  $J$  = 14.1, 2.4 Hz, 1H), 3.66–3.61 (m, 1H), 3.54 (s, 1H), 3.38 (t,  $J$  = 2.5 Hz, 1H), 3.10 (s, 1H), 2.95 (d,  $J$  = 4.1 Hz, 3H), 1.63 (d,  $J$  = 1.4 Hz, 3H);  $^{13}\text{C}$  NMR (150 MHz,  $\text{CDCl}_3$ , mixture of diastereomers)  $\delta$  171.28, 171.11, 138.51, 138.44, 137.74, 137.12, 136.25, 134.68, 132.34, 132.31, 129.02, 128.78, 128.33, 128.30, 128.21, 127.92, 127.88, 127.86, 127.82, 127.74, 127.59, 127.47, 127.37, 126.81, 125.24, 120.43, 118.71, 117.04, 116.92, 116.90, 65.59, 65.45, 54.19, 53.86, 51.85, 51.75, 50.95, 50.26, 48.27, 47.31, 44.28, 43.67, 27.41, 27.39, 21.66, 20.17; Yield: 86%, d.r. 8:1, White solid, m.p.= 234–236 °C; HRMS-EI ( $m/z$ ): calc'd for  $\text{C}_{26}\text{H}_{22}\text{N}_2\text{ONa}$  [ $\text{M}+\text{Na}$ ] $^+$  401.1630; found, 401.1625.

### 3,6,11-trimethyl-2-oxo-13-phenyl-2,3,8,12b-tetrahydro-1,8-methanodibenzo[*e,h*]indole-1(7*aH*)-carbonitrile

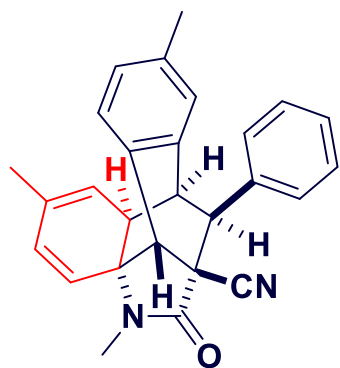

(**27**): A clean vial (5 mL) equipped with a magnetic stir bar were added to **1y** (0.2 mmol), 4CzIPN (2.5 mol%) and 2-MeTHF (3.0 mL) at room temperature, and then placed at a distance of approx. 3 cm from a 24 W blue LED, and the solution was stirred at room temperature under visible-light irradiation for 6–24 h. The progress of the reaction was monitored by thin layer chromatography. When the reaction was complete, the solvent was removed under reduced pressure. The residue was purified by column chromatography on silica gel eluting with Hex/EA = 80:20–60:40 to

afford the dearomative cyclization product **27** derivatives.  $^1\text{H}$  NMR (400 MHz,  $\text{CDCl}_3$ , major isomer)  $\delta$  7.43 (d,  $J$  = 7.3 Hz, 1H), 7.35 (td,  $J$  = 7.5, 1.3 Hz, 1H), 7.29 (td,  $J$  = 7.5, 1.4 Hz, 1H), 6.89 (dd,  $J$  = 11.0, 7.9 Hz, 3H), 6.26 (d,  $J$  = 8.1 Hz, 2H), 5.68 (dd,  $J$  = 9.8, 1.3 Hz, 1H), 5.30 (d,  $J$  = 9.8 Hz, 1H), 4.94 (d,  $J$  = 1.4 Hz, 1H), 3.67 (d,  $J$  = 2.5 Hz, 1H), 3.55 (s, 1H), 3.32 (t,  $J$  = 2.8 Hz, 1H), 3.12 (dd,  $J$  = 5.5, 2.8 Hz, 1H), 2.95 (s, 3H), 2.22 (s, 3H), 1.45 – 1.40 (m, 3H).  $^{13}\text{C}$  NMR (100 MHz,  $\text{CDCl}_3$ , major isomer)  $\delta$  171.50, 138.12, 137.40, 135.54, 132.20, 131.94, 128.88, 128.59, 128.29, 128.26, 127.79, 127.50, 127.32, 123.17, 122.54, 116.96, 64.66, 53.75, 51.45, 51.15, 47.79, 44.30, 27.43, 21.03, 20.97.; Yield: 81%, d.r. 20:1, White solid, m.p.= 298–300°C; HRMS-EI ( $m/z$ ): calc'd for  $\text{C}_{27}\text{H}_{24}\text{N}_2\text{ONa}$  [ $\text{M}+\text{Na}$ ] $^+$ , 415.1787; found, 415.1784.

### 5-chloro-3-methyl-2-oxo-13-phenyl-2,3,8,12b-tetrahydro-1,8-methanodibenzo[*e,h*]indole-1(7*aH*)-

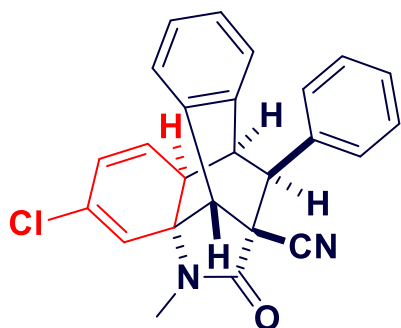

carbonitrile (**28**): A clean vial (5 mL) equipped with a magnetic stir bar were added to **1z** (0.2 mmol), 4CzIPN (2.5 mol%) and 2-MeTHF (3.0 mL) at room temperature, and then placed at a distance of approx. 3 cm from a 24 W blue LED, and the solution was stirred at room temperature under visible-light irradiation for 4–10 h. The progress of the reaction was monitored by thin layer chromatography. When the reaction was complete, the solvent was removed under reduced pressure. The residue was purified by column chromatography

on silica gel eluting with Hex/EA = 80:20–60:40 to afford the dearomative cyclization product **28** derivatives.  $^1\text{H}$

**NMR** (400 MHz, CDCl<sub>3</sub>, mixture of diastereomers)  $\delta$  7.49 (dd,  $J$  = 12.2, 7.3 Hz, 1H), 7.41 (td,  $J$  = 7.5, 1.3 Hz, 1H), 7.37 – 7.30 (m, 1H), 7.22 – 7.14 (m, 1H), 7.09 (dd,  $J$  = 14.3, 7.4 Hz, 3H), 6.91 (d,  $J$  = 7.3 Hz, 1H), 6.39 (dd,  $J$  = 17.1, 7.4 Hz, 2H), 5.76 (dd,  $J$  = 9.7, 6.4 Hz, 1H), 5.59 (dd,  $J$  = 6.3, 2.1 Hz, 1H), 5.45 (s, 1H), 5.41 – 5.36 (m, 1H), 5.35 (s, 1H), 3.94 (t,  $J$  = 2.7 Hz, 1H), 3.70 (dd,  $J$  = 11.2, 2.6 Hz, 2H), 3.64 (s, 1H), 3.42 (t,  $J$  = 2.7 Hz, 1H), 3.19 (dd,  $J$  = 18.6, 2.7 Hz, 1H), 2.99 (d,  $J$  = 1.4 Hz, 3H); **<sup>13</sup>C NMR** (100 MHz, CDCl<sub>3</sub>, mixture of diastereomers)  $\delta$  170.90, 138.06, 137.99, 137.24, 136.51, 134.51, 133.15, 131.58, 131.27, 129.00, 128.96, 128.70, 128.67, 128.14, 128.00, 127.96, 127.89, 127.80, 127.62, 127.42, 126.68, 124.24, 121.94, 120.57, 118.28, 116.58, 116.48, 67.02, 66.54, 53.73, 53.62, 51.68, 51.15, 50.69, 50.01, 49.28, 46.91, 44.22, 43.50, 27.63, 27.59; Yield: 70%, d.r. 2:1, Off-white solid, m.p.= 303-305 °C; **HRMS-EI (m/z)**: calc'd for C<sub>25</sub>H<sub>19</sub>ClN<sub>2</sub>ONa [M+Na]<sup>+</sup> 421.1084; found, 421.1080.

**7-iodo-3-methyl-2-oxo-13-phenyl-2,3,8,12*b*-tetrahydro-1,8-methanodibenzo[*e,h*]indole-1(7*aH*)-carbonitrile**

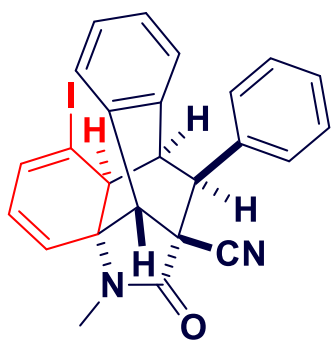

**(29)**: A clean vial (5 mL) equipped with a magnetic stir bar were added to **1aa** (0.2 mmol), 4CzIPN (2.5 mol%) and 2- MeTHF (3.0 mL) at room temperature, and then placed at a distance of approx. 3 cm from a 24 W blue LED, and the solution was stirred at room temperature under visible-light irradiation for 6-24 h. The progress of the reaction was monitored by thin layer chromatography. When the reaction was complete, the solvent was removed under reduced pressure. The residue was purified by column chromatography on silica gel eluting with Hex/EA = 80:20-60:40 to

afford the dearomative cyclization product **29** derivatives. **<sup>1</sup>H NMR** (400 MHz, CDCl<sub>3</sub>, major isomer)  $\delta$  7.56 (d,  $J$  = 7.3 Hz, 1H), 7.42 (tt,  $J$  = 3.9, 1.9 Hz, 1H), 7.34 (td,  $J$  = 7.5, 1.3 Hz, 1H), 7.20 – 7.14 (m, 1H), 7.08 (t,  $J$  = 7.6 Hz, 2H), 6.93 (d,  $J$  = 6.9 Hz, 1H), 6.53 (d,  $J$  = 6.2 Hz, 1H), 6.42 – 6.35 (m, 2H), 5.34 (dd,  $J$  = 9.5, 3.4 Hz, 1H), 5.13 – 5.04 (m, 1H), 4.13 (s, 1H), 3.66 (d,  $J$  = 2.5 Hz, 1H), 3.39 – 3.30 (m, 2H), 3.07 (s, 3H); **<sup>13</sup>C NMR** (101 MHz, CDCl<sub>3</sub>, major isomer)  $\delta$  171.20, 140.69, 137.95, 137.82, 131.23, 129.38, 129.00, 128.73, 127.99, 127.97, 127.40, 121.76, 116.63, 99.63, 69.93, 52.44, 51.75, 50.37, 47.82, 45.64, 28.05. Yield: 54%, d.r. 20:1, Off-white solid, m.p.= 303-305 °C; **HRMS-EI (m/z)**: calc'd for C<sub>25</sub>H<sub>19</sub>IN<sub>2</sub>ONa [M+Na]<sup>+</sup> 513.0440; found, 513.0438.

**methyl-1-cyano-3-methyl-2-oxo-13-phenyl-1,2,3,7*a*,8,12*b*-hexahydro-1,8-methanodibenzo[*e,h*]indole-6-**

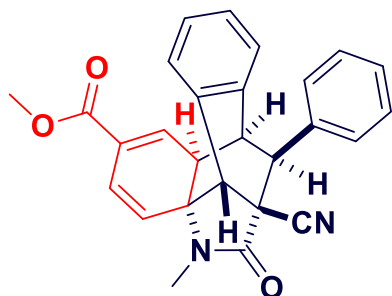

**carboxylate (30)**: A clean vial (5 mL) equipped with a magnetic stir bar were added to **1ab** (0.2 mmol), 4CzIPN (2.5 mol%) and 2-MeTHF (3.0 mL) at room temperature, and then placed at a distance of approx. 3 cm from a 24 W blue LED, and the solution was stirred at room temperature under visible-light irradiation for 6-24 h. The progress of the reaction was monitored by thin layer chromatography. When the reaction was complete, the solvent was removed

under reduced pressure. The residue was purified by column chromatography on silica gel eluting with Hex/EA = 80:20-60:40 to afford the dearomative cyclization product **30** derivatives. **<sup>1</sup>H NMR** (400 MHz, CDCl<sub>3</sub>, major

isomer)  $\delta$  7.97 (d,  $J$  = 1.4 Hz, 1H), 7.89 (dd,  $J$  = 7.7, 1.6 Hz, 1H), 7.50 (dd,  $J$  = 5.6, 3.0 Hz, 1H), 7.46 (dd,  $J$  = 5.7, 2.9 Hz, 1H), 7.42 – 7.40 (m, 1H), 7.34 – 7.29 (m, 2H), 7.27 – 7.21 (m, 3H), 6.96 (dd,  $J$  = 7.5, 1.9 Hz, 2H), 6.19 (s, 1H), 4.75 (s, 1H), 4.54 (s, 1H), 3.91 (d,  $J$  = 1.2 Hz, 1H), 3.88 (s, 3H), 2.80 (t,  $J$  = 10.4 Hz, 3H);  $^{13}\text{C}$  NMR (101 MHz,  $\text{CDCl}_3$ , major isomer)  $\delta$  166.82, 166.30, 144.71, 142.54, 140.28, 139.67, 138.57, 128.84, 128.73, 128.61, 128.17, 128.12, 127.69, 127.17, 126.55, 126.35, 125.68, 123.68, 119.38, 56.32, 53.11, 52.42, 52.09, 49.53, 27.44. Yield: 66%, d.r.20:1, White solid, m.p.= 308-310 °C; **HRMS-EI (m/z)**: calc'd for  $\text{C}_{27}\text{H}_{22}\text{N}_2\text{O}_3\text{Na}[\text{M}+\text{Na}]^+$  445.1528; found, 445.1526.

**3-methyl-2-oxo-2,3,8,12b-tetrahydro-1,8-methanodibenzo[*e,h*]indole-1(7*aH*)-carbonitrile (31)**: A clean vial

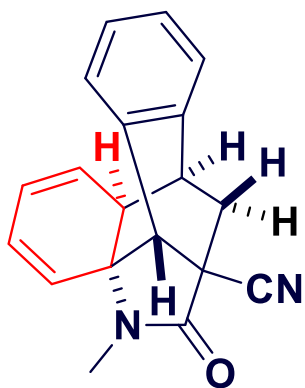

(5 mL) equipped with a magnetic stir bar were added to **1ac** (0.2 mmol), 4CzIPN (2.5 mol%) and 2-MeTHF (3.0 mL) at room temperature, and then placed at a distance of approx. 3 cm from a 24 W blue LED, and the solution was stirred at room temperature under visible-light irradiation for 6-24 h. The progress of the reaction was monitored by thin layer chromatography. When the reaction was complete, the solvent was removed under reduced pressure. The residue was purified by column chromatography on silica gel eluting with Hex/EA = 80:20-60:40 to afford the dearomative cyclization product **31** derivatives.  $^1\text{H}$  NMR (400 MHz,  $\text{CDCl}_3$ , mixture

of diastereomers)  $\delta$  7.97 (d,  $J$  = 1.4 Hz, 1H), 7.89 (dd,  $J$  = 7.7, 1.6 Hz, 1H), 7.55 – 7.37 (m, 4H), 7.34 – 7.30 (m, 2H), 7.29 – 7.21 (m, 4H), 6.96 (dd,  $J$  = 7.5, 1.9 Hz, 2H), 6.19 (s, 1H), 4.75 (s, 1H), 4.54 (s, 1H), 3.91 (d,  $J$  = 1.2 Hz, 1H), 3.88 (s, 3H), 2.82 (d,  $J$  = 4.7 Hz, 3H);  $^{13}\text{C}$  NMR (101 MHz,  $\text{CDCl}_3$ , mixture of diastereomers)  $\delta$  166.82, 166.30, 144.71, 142.54, 140.28, 139.67, 138.57, 128.84, 128.73, 128.61, 128.17, 128.12, 127.69, 127.17, 126.55, 126.35, 125.68, 123.68, 119.38, 56.32, 53.11, 52.42, 52.09, 49.53, 27.44. Yield: 55%, d.r. 1:1, White solid, m.p.= 261-263 °C; **HRMS-EI (m/z)**: calc'd for  $\text{C}_{19}\text{H}_{16}\text{N}_2\text{ONa} [\text{M}+\text{Na}]^+$  311.1161; found, 311.1157.

**3-methyl-2-oxo-2,3,8,12b-tetrahydro-1,8-methanodibenzo[*e,h*]indole-1,13(7*aH*)-dicarbonitrile (32)**: A clean

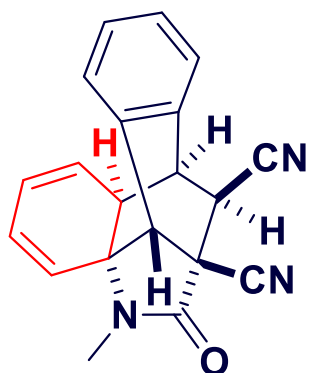

vial (5 mL) equipped with a magnetic stir bar were added to **1ad** (0.2 mmol), 4CzIPN (2.5 mol%) and 2-MeTHF (3.0 mL) at room temperature, and then placed at a distance of approx. 3 cm from a 24 W blue LED, and the solution was stirred at room temperature under visible-light irradiation for 6-24 h. The progress of the reaction was monitored by thin layer chromatography. When the reaction was complete, the solvent was removed under reduced pressure. The residue was purified by column chromatography on silica gel eluting with Hex/EA = 80:20-60:40 to afford the dearomative cyclization product **32** derivatives.  $^1\text{H}$  NMR (400 MHz,  $\text{CDCl}_3$ , major

isomer)  $\delta$  7.48 – 7.40 (m, 5H), 7.34 – 7.30 (m, 2H), 6.99 (d,  $J$  = 8.0 Hz, 1H), 5.45 (d,  $J$  = 10.1 Hz, 1H), 3.75 – 3.67 (m, 1H), 3.46 (s, 1H), 3.42 (s, 3H), 2.85 (dd,  $J$  = 17.1, 7.5 Hz, 1H), 2.62 (dd,  $J$  = 17.1, 7.6 Hz, 1H);  $^{13}\text{C}$  NMR

(100 MHz, CDCl<sub>3</sub>, major isomer)  $\delta$  162.18, 141.62, 141.28, 138.78, 137.72, 130.60, 129.87, 129.68, 129.42, 129.18, 127.31, 125.24, 123.61, 117.38, 116.08, 114.72, 55.97, 50.92, 49.86, 40.92, 38.76, 37.07, 21.37; Yield: 53%, d.r. 18:1, White solid, m.p.= 232-234 °C; **HRMS-EI (m/z)**: calc'd for C<sub>20</sub>H<sub>15</sub>N<sub>3</sub>O [M+H]<sup>+</sup> 313.1215; found, 314.1420.

### 3-methyl-2-oxo-15-phenyl-2,3,8,14*b*-tetrahydro-1,8-methanobenzo[*h*]naphtho[2,1-*e*]indole-1(7*aH*)-

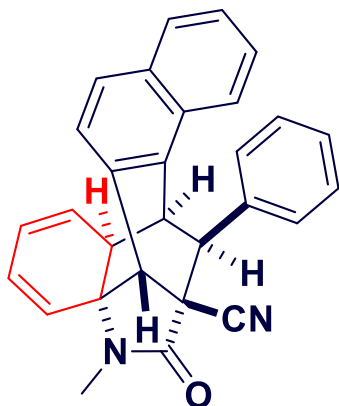

**carbonitrile (33)**: A clean vial (5 mL) equipped with a magnetic stir bar were added to **1ae** (0.2 mmol), 4CzIPN (2.5 mol%) and 2-MeTHF (3.0 mL) at room temperature, and then placed at a distance of approx. 3 cm from a 24 W blue LED, and the solution was stirred at room temperature under visible-light irradiation for 6-24 h. The progress of the reaction was monitored by thin layer chromatography. When the reaction was complete, the solvent was removed under reduced pressure. The residue was purified by column chromatography on silica gel eluting with Hex/EA = 80:20-60:40 to afford the dearomative cyclization product **33** derivatives. **<sup>1</sup>H NMR** (400 MHz, CDCl<sub>3</sub>, major isomer)  $\delta$  7.89 (dd, *J* = 8.2, 4.8 Hz, 2H), 7.58 (dd, *J* = 8.2, 4.8 Hz, 2H), 7.45 (ddd, *J* = 8.1, 6.8, 1.2 Hz, 1H), 7.36 (ddd, *J* = 8.2, 6.8, 1.3 Hz, 1H), 7.05 – 6.98 (m, 1H), 6.88 (t, *J* = 7.8 Hz, 2H), 6.34 (d, *J* = 7.3 Hz, 2H), 5.79 (dd, *J* = 9.8, 5.1 Hz, 1H), 5.39 (d, *J* = 9.8 Hz, 1H), 5.29 (dd, *J* = 9.6, 3.1 Hz, 1H), 5.24 (dd, *J* = 5.2, 2.2 Hz, 1H), 4.33 (t, *J* = 2.9 Hz, 1H), 3.89 (d, *J* = 2.6 Hz, 1H), 3.80 (s, 1H), 3.34 (dd, *J* = 5.6, 2.9 Hz, 1H), 3.02 (s, 3H); **<sup>13</sup>C NMR** (100 MHz, CDCl<sub>3</sub>, major isomer)  $\delta$  171.49, 138.11, 135.14, 133.24, 131.25, 129.72, 129.00, 128.66, 128.04, 128.01, 127.77, 127.55, 126.76, 125.91, 125.54, 122.82, 121.97, 121.37, 116.89, 65.02, 54.56, 52.34, 51.15, 44.94, 42.41, 27.72; Yield: 57%, d.r. 18:1, White solid, m.p.= 215-217 °C; **HRMS-EI (m/z)**: calc'd for C<sub>29</sub>H<sub>22</sub>N<sub>2</sub>O [M+H]<sup>+</sup> 437.1630; found, 437.1628.

### 3-cyclohexyl-2-oxo-13-phenyl-2,3,8,12*b*-tetrahydro-1,8-methanodibenzo[*e,h*]indole-1(7*aH*)-carbonitrile

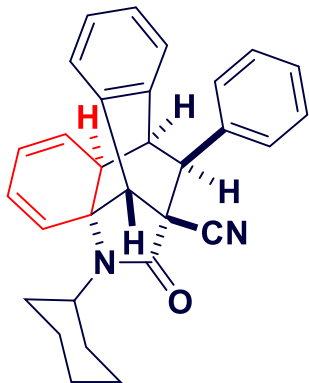

**(34)**: A clean vial (5 mL) equipped with a magnetic stir bar were added to **1af** (0.2 mmol), 4CzIPN (2.5 mol%) and 2-MeTHF (3.0 mL) at room temperature, and then placed at a distance of approx. 3 cm from a 24 W blue LED, and the solution was stirred at room temperature under visible-light irradiation for 6-24 h. The progress of the reaction was monitored by thin layer chromatography. When the reaction was complete, the solvent was removed under reduced pressure. The residue was purified by column chromatography on silica gel eluting with Hex/EA = 80:20-60:40 to afford the dearomative cyclization product **34** derivatives. **<sup>1</sup>H NMR** (400 MHz, CDCl<sub>3</sub>, major isomer)  $\delta$  7.43 (d, *J* = 6.7 Hz, 1H), 7.36 (td, *J* = 7.5, 1.2 Hz, 1H), 7.30 (td, *J* = 7.4, 1.3 Hz, 1H), 7.15 (t, *J* = 7.3 Hz, 1H), 7.07 (t, *J* = 7.5 Hz, 2H), 6.91 (d, *J* = 7.1 Hz, 1H), 6.41 (d, *J* = 7.4 Hz, 2H), 5.78 (dd, *J* = 9.8, 5.6 Hz, 1H), 5.39 (dd, *J* = 18.1, 5.6 Hz, 2H), 5.25 (d, *J* = 8.7 Hz, 1H), 3.73 (s, 1H), 3.61 – 3.56 (m, 1H), 3.53 (dd, *J* = 7.9,

4.3 Hz, 1H), 3.38 (s, 2H), 2.32 (dt,  $J = 12.4, 8.9$  Hz, 1H), 2.11 (tt,  $J = 12.3, 6.3$  Hz, 1H), 1.85 (d,  $J = 11.0$  Hz, 4H), 1.67 (s, 1H), 1.27 (ddd,  $J = 20.2, 16.6, 13.2$  Hz, 3H);  $^{13}\text{C}$  NMR (150 MHz,  $\text{CDCl}_3$ , major isomer)  $\delta$  170.87, 138.53, 137.74, 132.35, 129.03, 128.61, 128.21, 127.87, 127.84, 127.71, 127.41, 127.40, 127.13, 123.81, 120.83, 117.07, 66.17, 55.04, 54.46, 51.59, 51.48, 47.32, 46.99, 31.21, 30.80, 26.11, 26.07, 25.08; Yield: 87%, d.r. 20:1, White solid, m.p.= 263-265 °C; HRMS-EI ( $m/z$ ): calc'd for  $\text{C}_{30}\text{H}_{28}\text{N}_2\text{ONa}$   $[\text{M}+\text{Na}]^+$  455.2099; found, 455.2096.

**6-iodo-3-methyl-2-oxo-13-phenyl-2,3,8,12b-tetrahydro-1,8-methanodibenzo[*e,h*]indole-1(7*aH*)-carbonitrile**

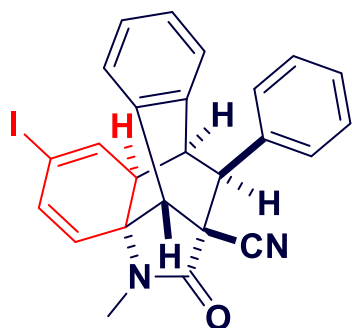

**(35):** A clean vial (5 mL) equipped with a magnetic stir bar were added to **1ag** (0.2 mmol), 4CzIPN (2.5 mol%) and 2-MeTHF (3.0 mL) at room temperature, and then placed at a distance of approx. 3 cm from a 24 W blue LED, and the solution was stirred at room temperature under visible-light irradiation for 6-24 h. The progress of the reaction was monitored by thin layer chromatography. When the reaction was complete, the solvent was removed under reduced pressure. The residue was purified by column chromatography on silica gel

eluting with Hex/EA = 80:20-60:40 to afford the dearomative cyclization product **35** derivatives.  $^1\text{H}$  NMR (400 MHz,  $\text{CDCl}_3$ , major isomer)  $\delta$  7.48 (d,  $J = 7.3$  Hz, 1H), 7.39 (dtd,  $J = 16.6, 7.5, 1.3$  Hz, 2H), 7.17 (ddd,  $J = 6.6, 3.9, 1.2$  Hz, 1H), 7.08 (t,  $J = 7.5$  Hz, 2H), 6.94 (d,  $J = 7.2$  Hz, 1H), 6.37 (d,  $J = 7.3$  Hz, 2H), 5.99 (dd,  $J = 10.0, 1.1$  Hz, 1H), 5.89 (d,  $J = 3.5$  Hz, 1H), 5.20 (d,  $J = 10.0$  Hz, 1H), 3.69 (d,  $J = 2.5$  Hz, 1H), 3.62 (s, 1H), 3.39 (t,  $J = 2.8$  Hz, 1H), 3.19 (t,  $J = 3.3$  Hz, 1H), 2.98 (s, 3H);  $^{13}\text{C}$  NMR (101 MHz,  $\text{CDCl}_3$ , major isomer)  $\delta$  171.22, 137.97, 137.27, 136.86, 136.20, 131.46, 129.05, 128.97, 128.12, 128.07, 128.01, 127.46, 124.46, 116.59, 85.72, 63.26, 53.58, 51.35, 50.82, 47.93, 47.04, 27.69; Yield: 75%, d.r. 20:1, White solid, m.p.= 223-225 °C; HRMS-EI ( $m/z$ ): calc'd for  $\text{C}_{25}\text{H}_{19}\text{IN}_2\text{ONa}$   $[\text{M}+\text{Na}]^+$  513.0440; found, 513.0438.

**methyl 1-cyano-3-methyl-2-oxo-1,2,3,7a,8,12b-hexahydro-1,8-methanodibenzo[*e,h*]indol-13-yl)benzoate**

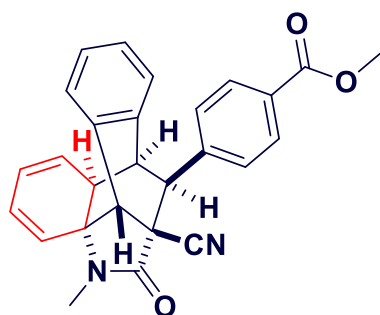

**(36):** A clean vial (5 mL) equipped with a magnetic stir bar were added to **1ah** (0.2 mmol), (4CzIPN (2.5 mol%) and 2-MeTHF (3.0 mL) at room temperature, and then placed at a distance of approx. 3 cm from a 24 W blue LED, and the solution was stirred at room temperature under visible-light irradiation for 6-24 h. The progress of the reaction was monitored by thin layer chromatography. When the reaction was complete, the solvent was removed under reduced

pressure. The residue was purified by column chromatography on silica gel eluting with Hex/EA = 80:20-60:40 to afford the dearomative cyclization product **36** derivatives.  $^1\text{H}$  NMR (400 MHz,  $\text{CDCl}_3$ , major isomer)  $\delta$  7.97 (d,  $J = 1.6$  Hz, 1H), 7.90 (dd,  $J = 7.8, 1.7$  Hz, 1H), 7.51 (dd,  $J = 5.5, 3.0$  Hz, 1H), 7.46 (dd,  $J = 5.7, 3.0$  Hz, 1H), 7.42 (d,  $J = 7.8$  Hz, 1H), 7.32 (ddd,  $J = 9.6, 5.0, 3.0$  Hz, 2H), 7.28 – 7.27 (m, 1H), 7.26 – 7.23 (m, 1H), 6.96 (dd,  $J = 7.5, 2.0$  Hz, 2H), 6.19 (s, 1H), 4.75 (s, 1H), 4.54 (d,  $J = 1.2$  Hz, 1H), 3.90 (d,  $J = 1.4$  Hz, 1H), 3.88 (s, 3H),

2.97 – 2.88 (m, 1H), 2.83 (d,  $J = 4.8$  Hz, 3H);  $^{13}\text{C}$  NMR (100 MHz,  $\text{CDCl}_3$ , major isomer)  $\delta$  166.84, 166.32, 144.70, 142.55, 140.26, 139.67, 138.54, 128.81, 128.73, 128.64, 128.19, 128.16, 127.71, 127.20, 126.57, 126.39, 125.70, 123.69, 119.40, 56.31, 53.07, 52.48, 52.13, 49.52, 27.47; Yield: 73%, d.r. 20:1, White solid, m.p.= 223-225 °C; HRMS-EI ( $m/z$ ): calc'd for  $\text{C}_{27}\text{H}_{22}\text{N}_2\text{O}_3\text{Na}$   $[\text{M}+\text{Na}]^+$  445.1528; found, 445.1526.

**3-methyl-2,6-dioxo-13-phenyl-2,3,7,7a,8,12b-hexahydro-1,8-methanodibenzo[*e,h*]indole-1(6*H*)-**

**carbonitrile (43):** A clean vial (5 mL) equipped with a magnetic stir bar were added to **1ai** (0.2 mmol), 4CzIPN

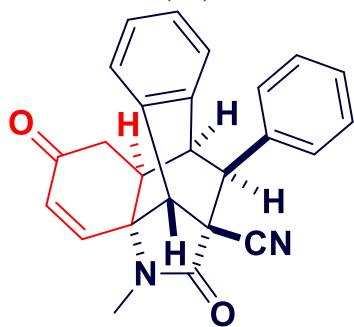

(2.5 mol%) and 2-MeTHF (3.0 mL) at room temperature, and then placed at a distance of approx. 3 cm from a 24 W blue LED, and the solution was stirred at room temperature under visible-light irradiation for 6-24 h. The progress of the reaction was monitored by thin layer chromatography. When the reaction was complete, the solvent was removed under reduced pressure. The residue was purified by column chromatography on silica gel eluting with Hex/EA = 80:20-

60:40 to afford the dearomative cyclization product **43** derivatives.  $^1\text{H}$  NMR (597 MHz,  $\text{CDCl}_3$ , major isomers)  $\delta$  7.52 (d,  $J = 7.3$  Hz, 1H), 7.46 (td,  $J = 7.5, 1.2$  Hz, 1H), 7.40 (td,  $J = 7.5, 1.3$  Hz, 1H), 7.21-7.16 (m, 1H), 7.10 (t,  $J = 7.7$  Hz, 2H), 7.03 (d,  $J = 7.3$  Hz, 1H), 6.46 (d,  $J = 10.3$  Hz, 1H), 6.41 (d,  $J = 7.3$  Hz, 2H), 6.16 (d,  $J = 10.3$  Hz, 1H), 3.87 (s, 1H), 3.66 (d,  $J = 2.4$  Hz, 1H), 3.26 (t,  $J = 2.6$  Hz, 1H), 2.91 (s, 3H), 2.81 (ddd,  $J = 10.8, 7.9, 3.0$  Hz, 1H), 2.45 (dd,  $J = 16.7, 7.9$  Hz, 1H), 1.69 (dd,  $J = 16.7, 10.6$  Hz, 1H);  $^{13}\text{C}$  NMR (150 MHz,  $\text{CDCl}_3$ , major isomers)  $\delta$  195.99, 171.04, 143.87, 137.76, 136.98, 134.70, 130.51, 129.33, 129.07, 129.02, 128.59, 128.16, 128.07, 116.29, 62.96, 52.77, 51.13, 51.09, 48.83, 40.31, 40.07, 27.15; Yield: 85%, d.r. 20:1, Off-white solid, m.p.= 201-203 °C; HRMS-EI ( $m/z$ ): calc'd for  $\text{C}_{25}\text{H}_{20}\text{N}_2\text{O}_2\text{Na}$   $[\text{M}+\text{Na}]^+$  403.1423; found, 403.1421.

**3-methyl-2,6-dioxo-13-(*p*-tolyl)-2,3,7,7a,8,12b-hexahydro-1,8-methanodibenzo[*e,h*]indole-1(6*H*)-**

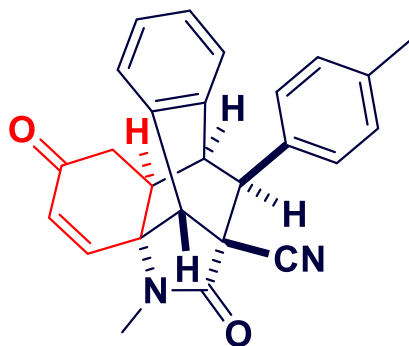

**carbonitrile (43'):** A clean vial (5 mL) equipped with a magnetic stir bar were added to **1aj** (0.2 mmol), 4CzIPN (2.5 mol%) and 2-MeTHF (3.0 mL) at room temperature, and then placed at a distance of approx. 3 cm from a 24 W blue LED, and the solution was stirred at room temperature under visible-light irradiation for 6-24 h. The progress of the reaction was monitored by thin layer chromatography. When the reaction was complete, the solvent was removed under reduced pressure. The residue was purified by column chromatography on silica gel eluting with Hex/EA = 80:20-60:40

to afford the dearomative cyclization product **43'** derivatives.  $^1\text{H}$  NMR (400 MHz,  $\text{CDCl}_3$ , major isomers)  $\delta$  7.44 (d,  $J = 7.1$  Hz, 1H), 7.33 (dtd,  $J = 25.7, 7.5, 1.2$  Hz, 2H), 6.90 (dd,  $J = 10.6, 8.0$  Hz, 3H), 6.27 (d,  $J = 8.1$  Hz, 2H), 5.69 (dd,  $J = 10.1, 2.1$  Hz, 1H), 5.38 (d,  $J = 10.0$  Hz, 1H), 4.11 (d,  $J = 2.4$  Hz, 1H), 3.68 (d,  $J = 2.5$  Hz, 1H), 3.58 (s, 1H), 3.31 (t,  $J = 2.7$  Hz, 1H), 3.27 (s, 3H), 2.97 (s, 3H), 2.22 (s, 3H);  $^{13}\text{C}$  NMR (100 MHz,  $\text{CDCl}_3$ , major

isomers)  $\delta$  171.44, 150.50, 138.14, 137.46, 135.51, 131.63, 129.06, 128.91, 128.64, 128.41, 127.91, 127.74, 127.47, 124.97, 116.89, 94.79, 65.08, 54.24, 53.52, 51.30, 51.13, 48.80, 43.35, 27.52, 21.02; Yield: 83%, d.r. 20:1, Off-white solid, m.p.= 205-207 °C; **HRMS-EI (m/z)**: calc'd for C<sub>26</sub>H<sub>22</sub>N<sub>2</sub>O<sub>2</sub>Na [M+Na]<sup>+</sup> 417.1579; found, 417.1577.

**3-methyl-2-oxo-13-phenyl-2,3,5,6,7,7a,8,12b-octahydro-1,8-methanodibenzo[*e,h*]indole-1(4*H*)-carbonitrile (44)**: To a 25 mL Schlenk tube with a magnetic bar were added **2** (0.22 mmol) in MeOH (3 mL) was added Pd/C

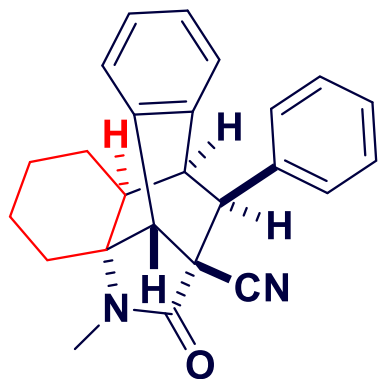

(10 mmol%), the resulted mixture was stirred at room temperature under H<sub>2</sub> (balloon) for 24 hours. The progress of the reaction was monitored by thin layer chromatography. When the reaction was complete, water was added to quench the reaction mixture, followed by extraction with ethyl acetate (3×10 mL). Finally, the combined organic layer was dried over sodium sulfate, filtered, and concentrated under vacuum. The residue was purified by column chromatography (Hex/EA = 60:40) on silica gel to afford the corresponding **44**.

**<sup>1</sup>H NMR** (400 MHz, CDCl<sub>3</sub>, mixture of diastereomers)  $\delta$  7.50 (d, *J* = 7.3 Hz, 1H), 7.42 (td, *J* = 7.5, 1.2 Hz, 1H), 7.33 (td, *J* = 7.5, 1.3 Hz, 1H), 7.18-7.11 (m, 1H), 7.10-7.03 (m, 2H), 6.95 (d, *J* = 7.3 Hz, 1H), 6.43-6.35 (m, 2H), 6.26-6.09 (m, 1H), 5.40 (dt, *J* = 46.9, 23.4 Hz, 1H), 3.71 (s, 1H), 3.63 (d, *J* = 2.4 Hz, 1H), 3.59 (d, *J* = 2.5 Hz, 1H), 3.55 (s, 1H), 3.14 (t, *J* = 2.7 Hz, 1H), 3.04 (s, 3H), 2.83 (s, 1H), 2.26 (ddd, *J* = 12.6, 5.6, 3.1 Hz, 1H), 2.03 (ddd, *J* = 12.4, 4.6, 3.2 Hz, 1H), 1.88-1.66 (m, 3H), 1.60-1.19 (m, 5H), 0.88 (t, *J* = 7.1 Hz, 1H), 0.60-0.50 (m, 1H), 0.41 (dd, *J* = 12.9, 4.6 Hz, 1H); **<sup>13</sup>C NMR** (100 MHz, CDCl<sub>3</sub>, mixture of diastereomers)  $\delta$  171.19, 138.63, 138.19, 138.10, 131.70, 131.36, 129.09, 129.03, 128.33, 128.25, 128.04, 127.92, 127.74, 127.67, 127.56, 127.52, 125.73, 117.21, 63.14, 54.23, 53.89, 51.85, 51.80, 51.31, 48.79, 48.67, 43.60, 42.25, 27.10, 26.77, 26.12, 24.91, 22.90, 19.45, 17.39. white solid, 91% yield, d.r. 7:1 m.p.= 261-263 °C; **HRMS-EI (m/z)**: calc'd for C<sub>25</sub>H<sub>24</sub>N<sub>2</sub>ONa [M+Na]<sup>+</sup> 391.1787; found, 391.1785.

**4-methyl-5-oxo-12-phenyl-4,5,6a,11,11a,11b-hexahydro-6,11-methanobenzo[*e*]oxireno[2',3':5,6]benzo[1,2-*h*]indole-6(1a*H*)-carbonitrile (45)**: To a 25 mL Schlenk tube with a magnetic

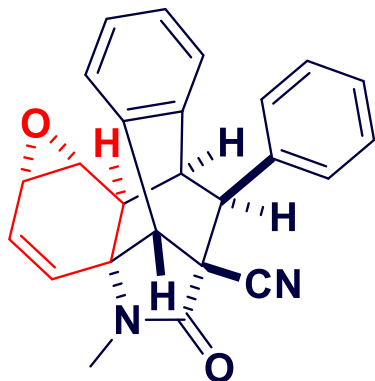

bar were added **2** (1.0 eq, 0.14 mmol) and *m*-CPBA (1.2 eq, 1.2 mmol) in DCM (2.0 mL) at r.t. After the reaction was finished, the reaction mixture was washed with water (3 mL), extracted with DCM (3×10 mL), dried over Na<sub>2</sub>SO<sub>4</sub> and concentrated in vacuo. The crude product was purified by column chromatography (silica gel, petroleum ether/EtOAc = 1:1) to afford **45** as off-white solid (92% yield, d.r. 20:1), m.p.= 198-200 °C; **<sup>1</sup>H NMR** (400 MHz, CDCl<sub>3</sub>, major isomer)  $\delta$  7.49-7.31 (m, 3H), 7.21-7.13 (m, 1H), 7.13-6.98 (m, 3H), 6.38 (d, *J* = 7.3 Hz, 2H), 6.16 (dd, *J* = 10.3, 3.7 Hz, 1H), 5.64 (d, *J* = 10.3 Hz, 1H), 3.69-3.62 (m, 2H), 3.47 (t, *J* = 2.8

Hz, 1H), 2.93 (d,  $J = 3.9$  Hz, 1H), 2.85 (s, 3H), 2.72-2.64 (m, 2H);  $^{13}\text{C}$  NMR (101 MHz,  $\text{CDCl}_3$ , major isomer)  $\delta$  171.19, 137.75, 136.26, 131.23, 131.20, 129.82, 128.95, 128.90, 128.23, 127.99, 127.96, 127.95, 127.25, 116.73, 63.90, 56.10, 53.56, 51.06, 50.41, 47.14, 45.26, 42.15, 27.10. **HRMS-EI (m/z):** calc'd for  $\text{C}_{25}\text{H}_{20}\text{N}_2\text{O}_2\text{Na}$   $[\text{M}+\text{Na}]^+$  403.1423; found, 403.1421.

## 7. REFERENCES

- (1) Gore, B. S.; Chiang, C.-H.; Lee, C. C.; Shih, Y.-L.; Wang, J.-J. *Org. Lett.*, **2020**, *22*, 7848-7852.
- (2) Frisch, M. J.; Trucks, G. W.; Schlegel, H. B.; Scuseria, G. E.; Robb, M. A.; Cheeseman, J. R.; Scalmani, G.; Barone, V.; Petersson, G. A.; Nakatsuji, H.; *Gaussian 16, Revision A.03*, Gaussian, Inc., Wallingford, CT, **2016**.
- (3) Zhao, Y.; Truhlar, D. G. *Theor. Chem. Acc.*, **2008**, *120*, 215-241.
- (4) Marenich, A. V.; Cramer, C. J.; Truhlar, D. G. *J. Phys. Chem. B*, **2009**, *113*, 6378-6396.

## 8. COSY and NOESY spectrum of compound of 2

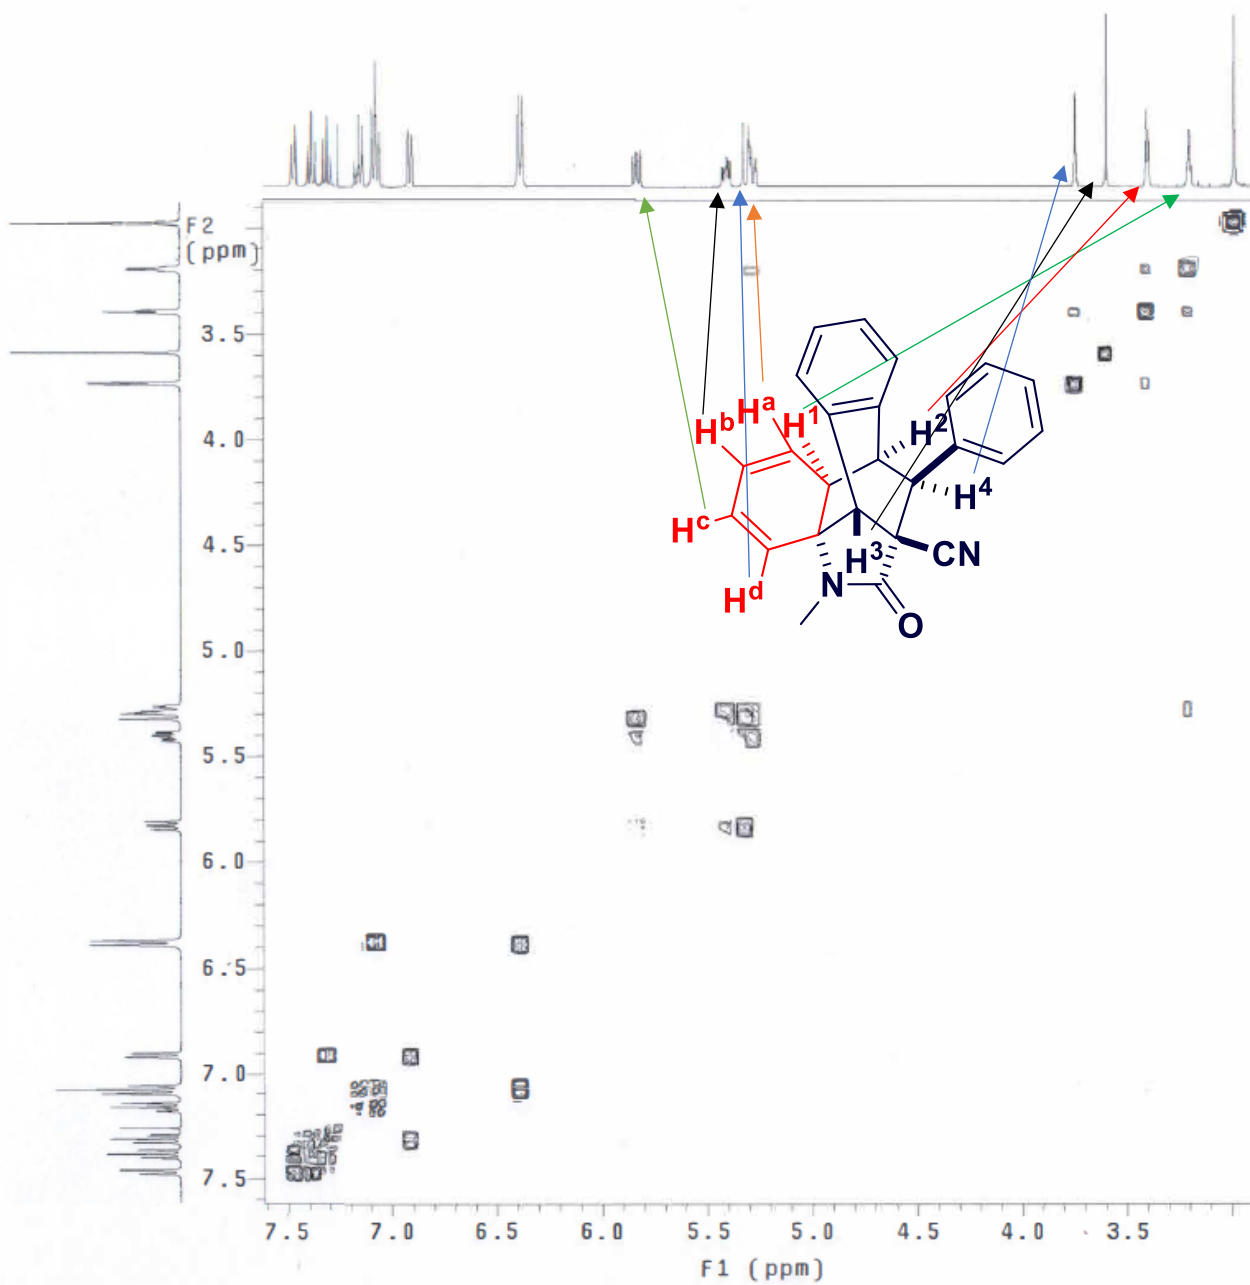

COSY spectrum of compound of 2 (recorded in CDCl<sub>3</sub>)

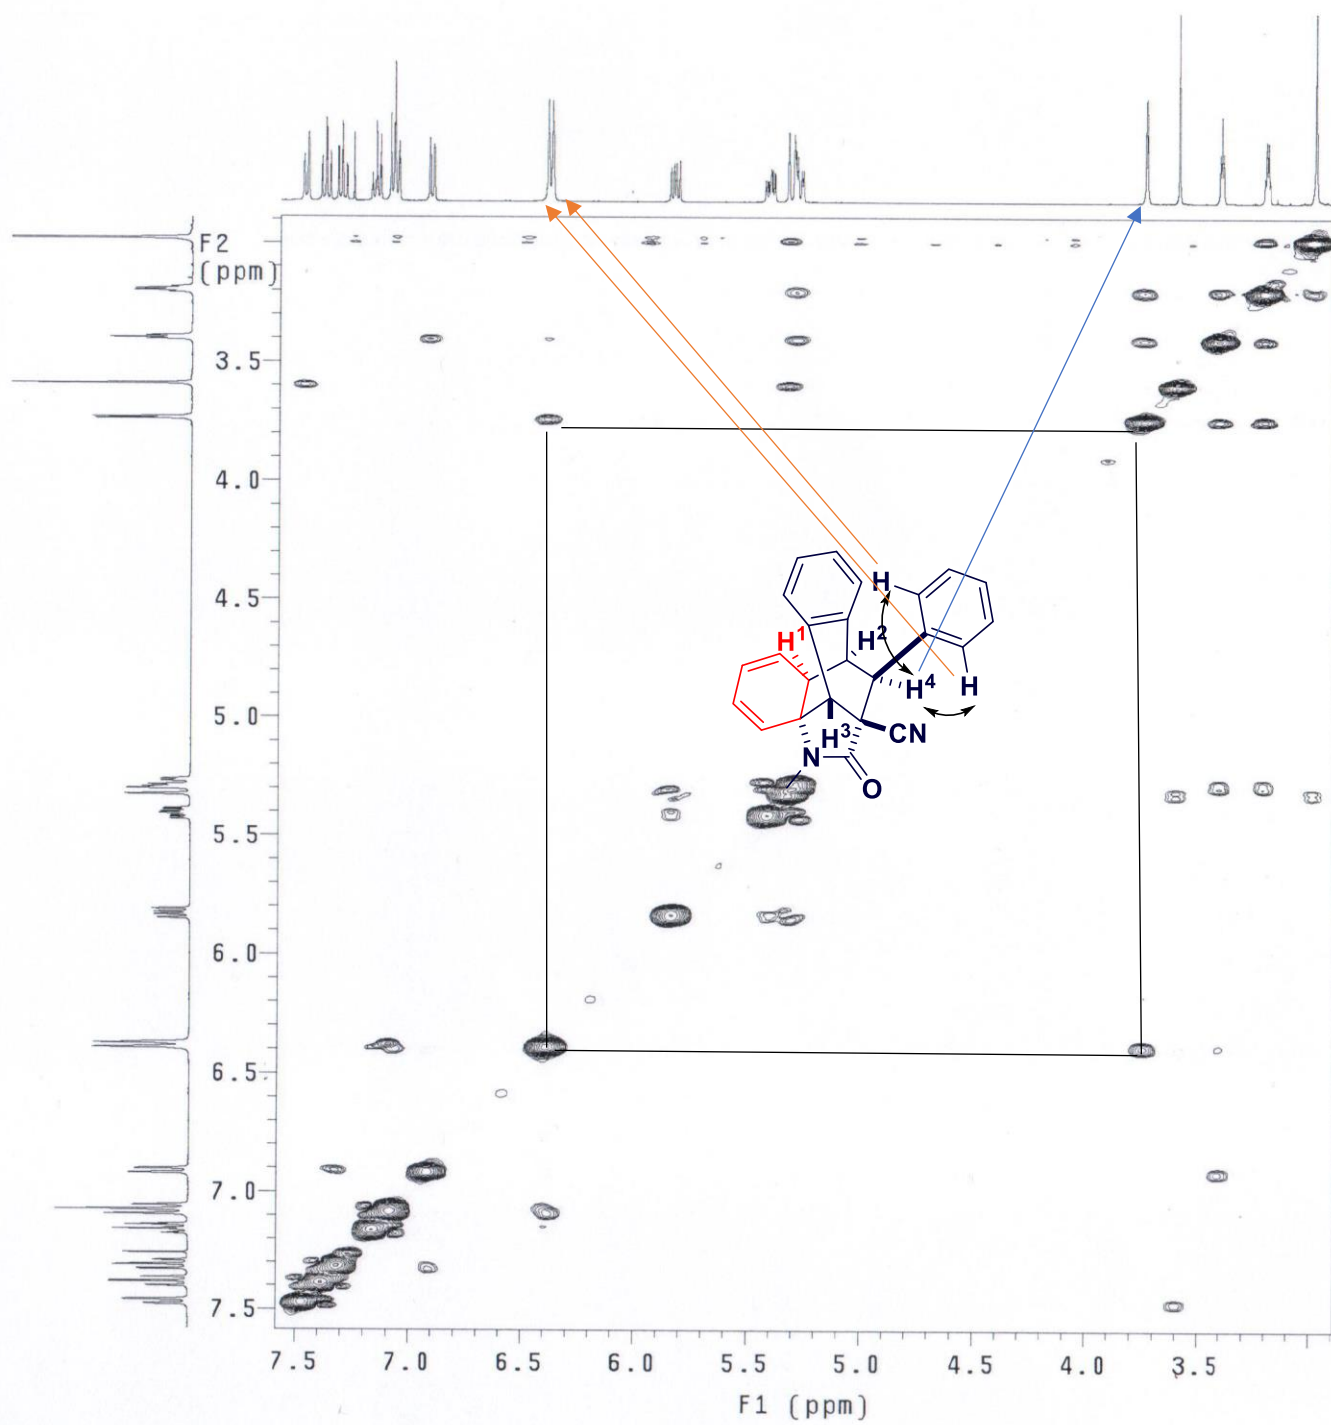

NOESY spectrum of compound of 2 (recorded in CDCl<sub>3</sub>)

Solvent  $\text{CDCl}_3$   
Spectrometer Frequency 400

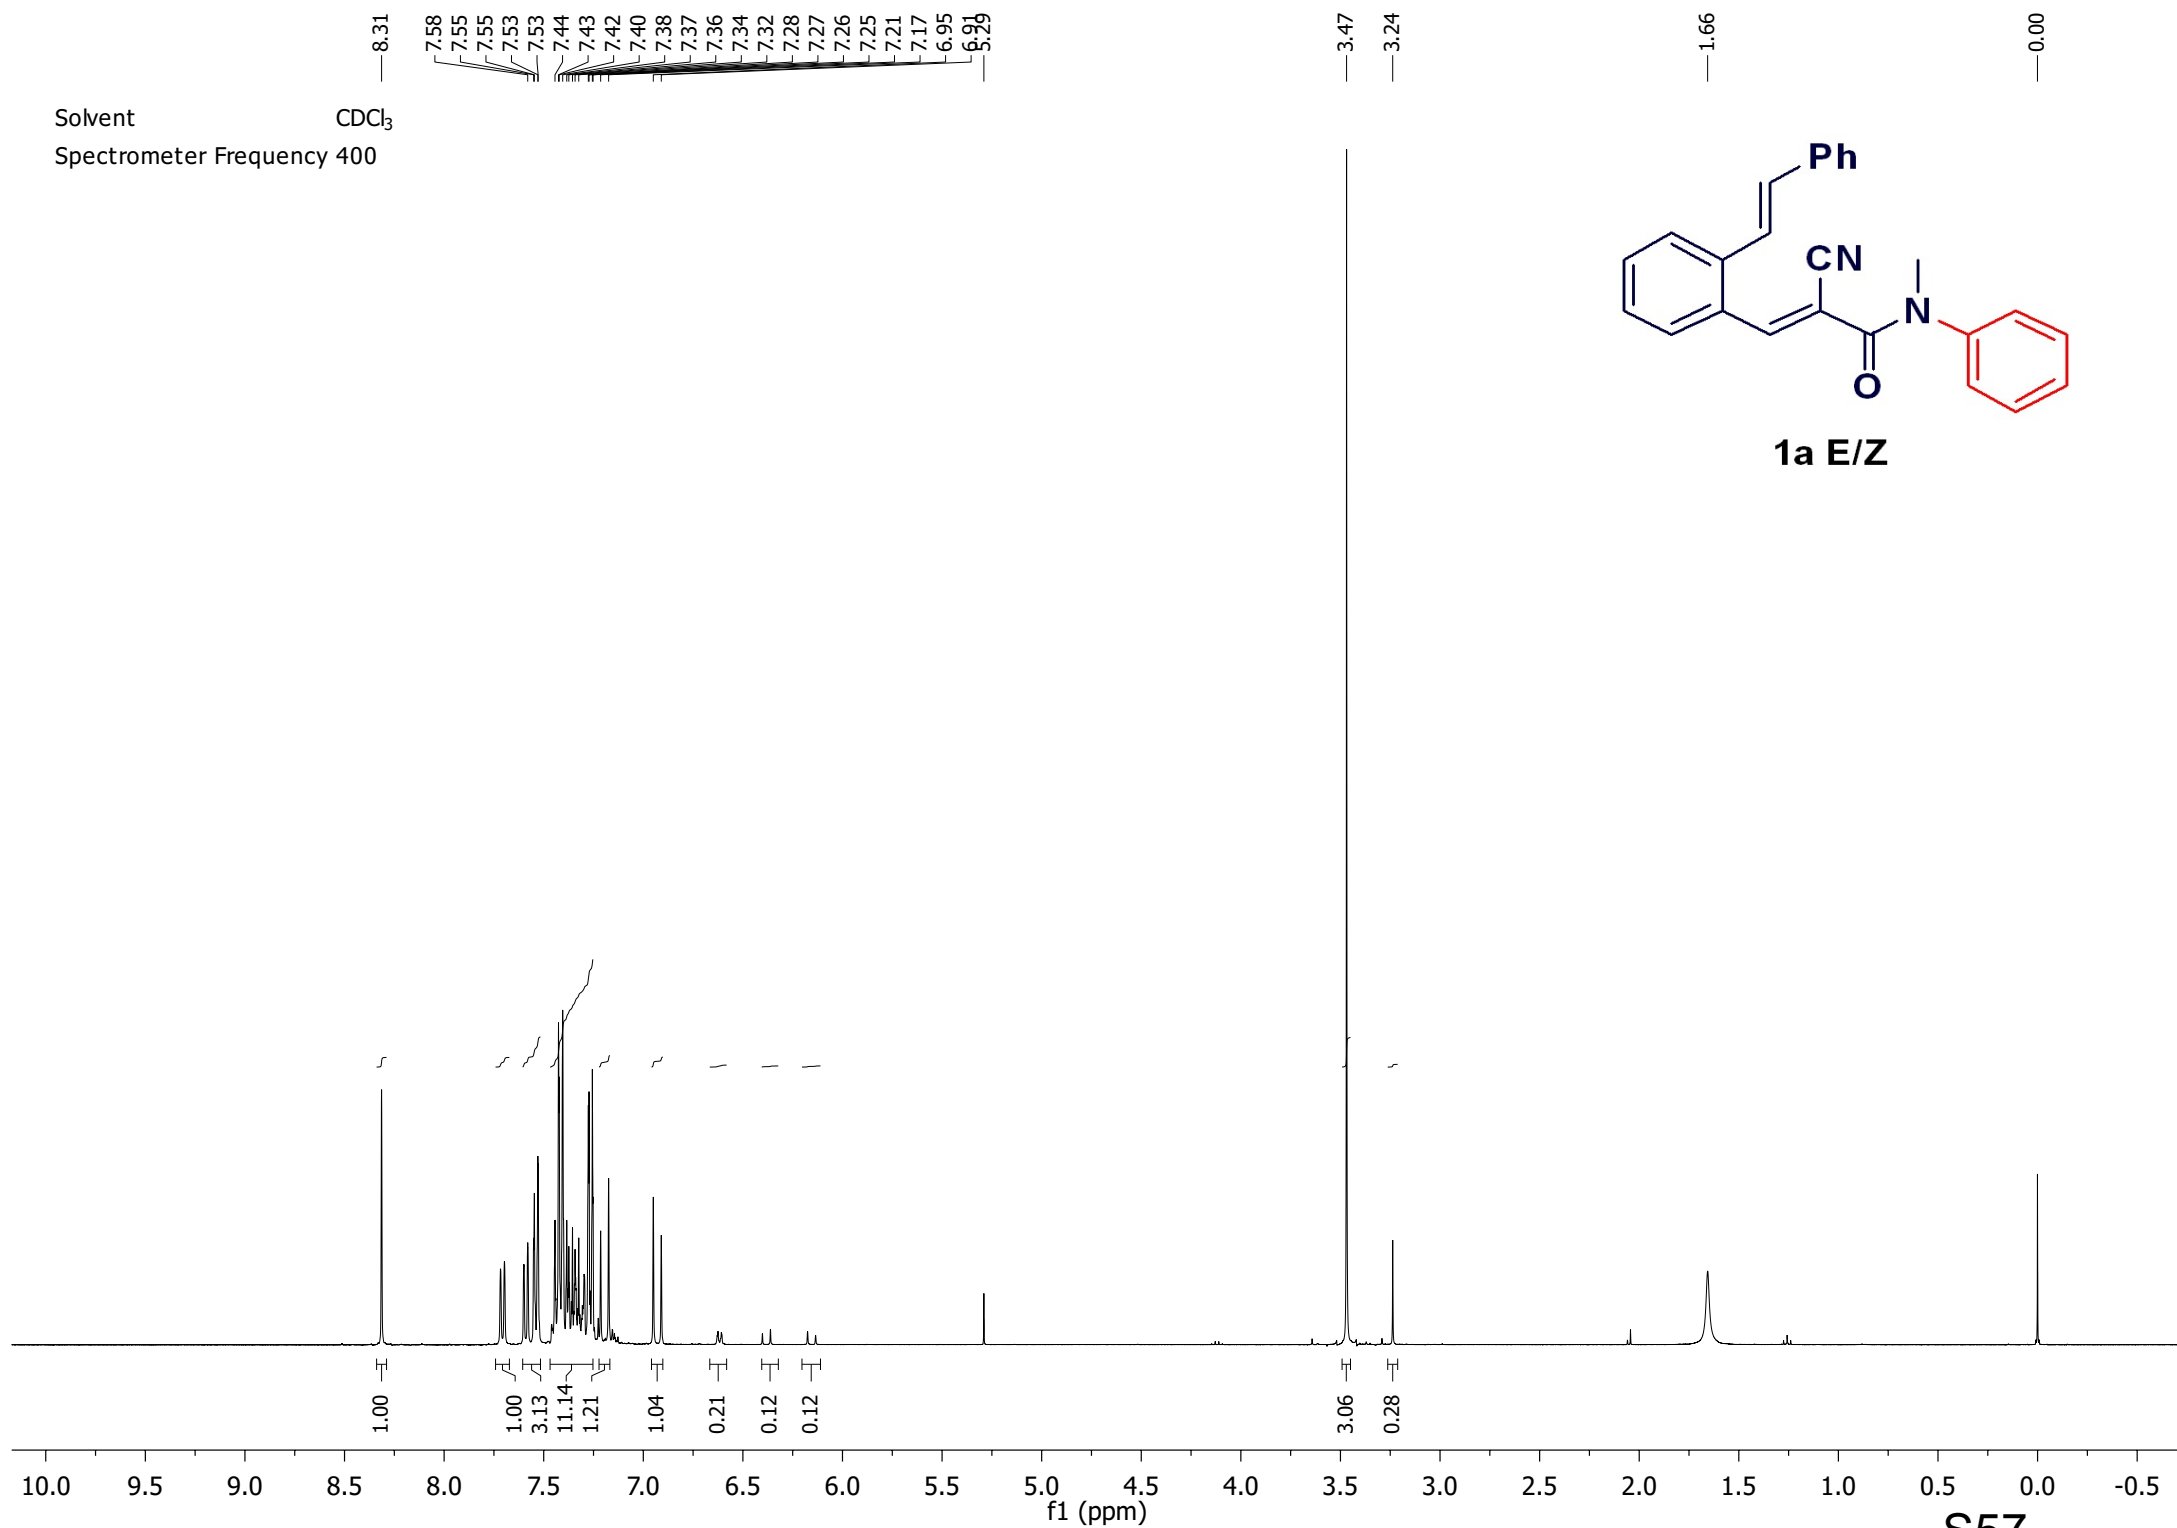

Solvent  $\text{CDCl}_3$   
Spectrometer Frequency 100

163.11  
151.71  
138.48  
134.37  
131.43  
130.32  
129.85  
128.76  
128.54  
128.38  
128.20  
127.62  
127.20  
127.02  
126.89  
124.89  
109.68

77.31  
76.99  
76.67

38.87

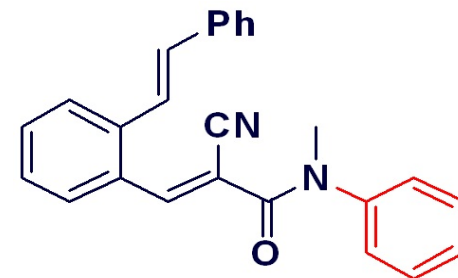

1a E/Z

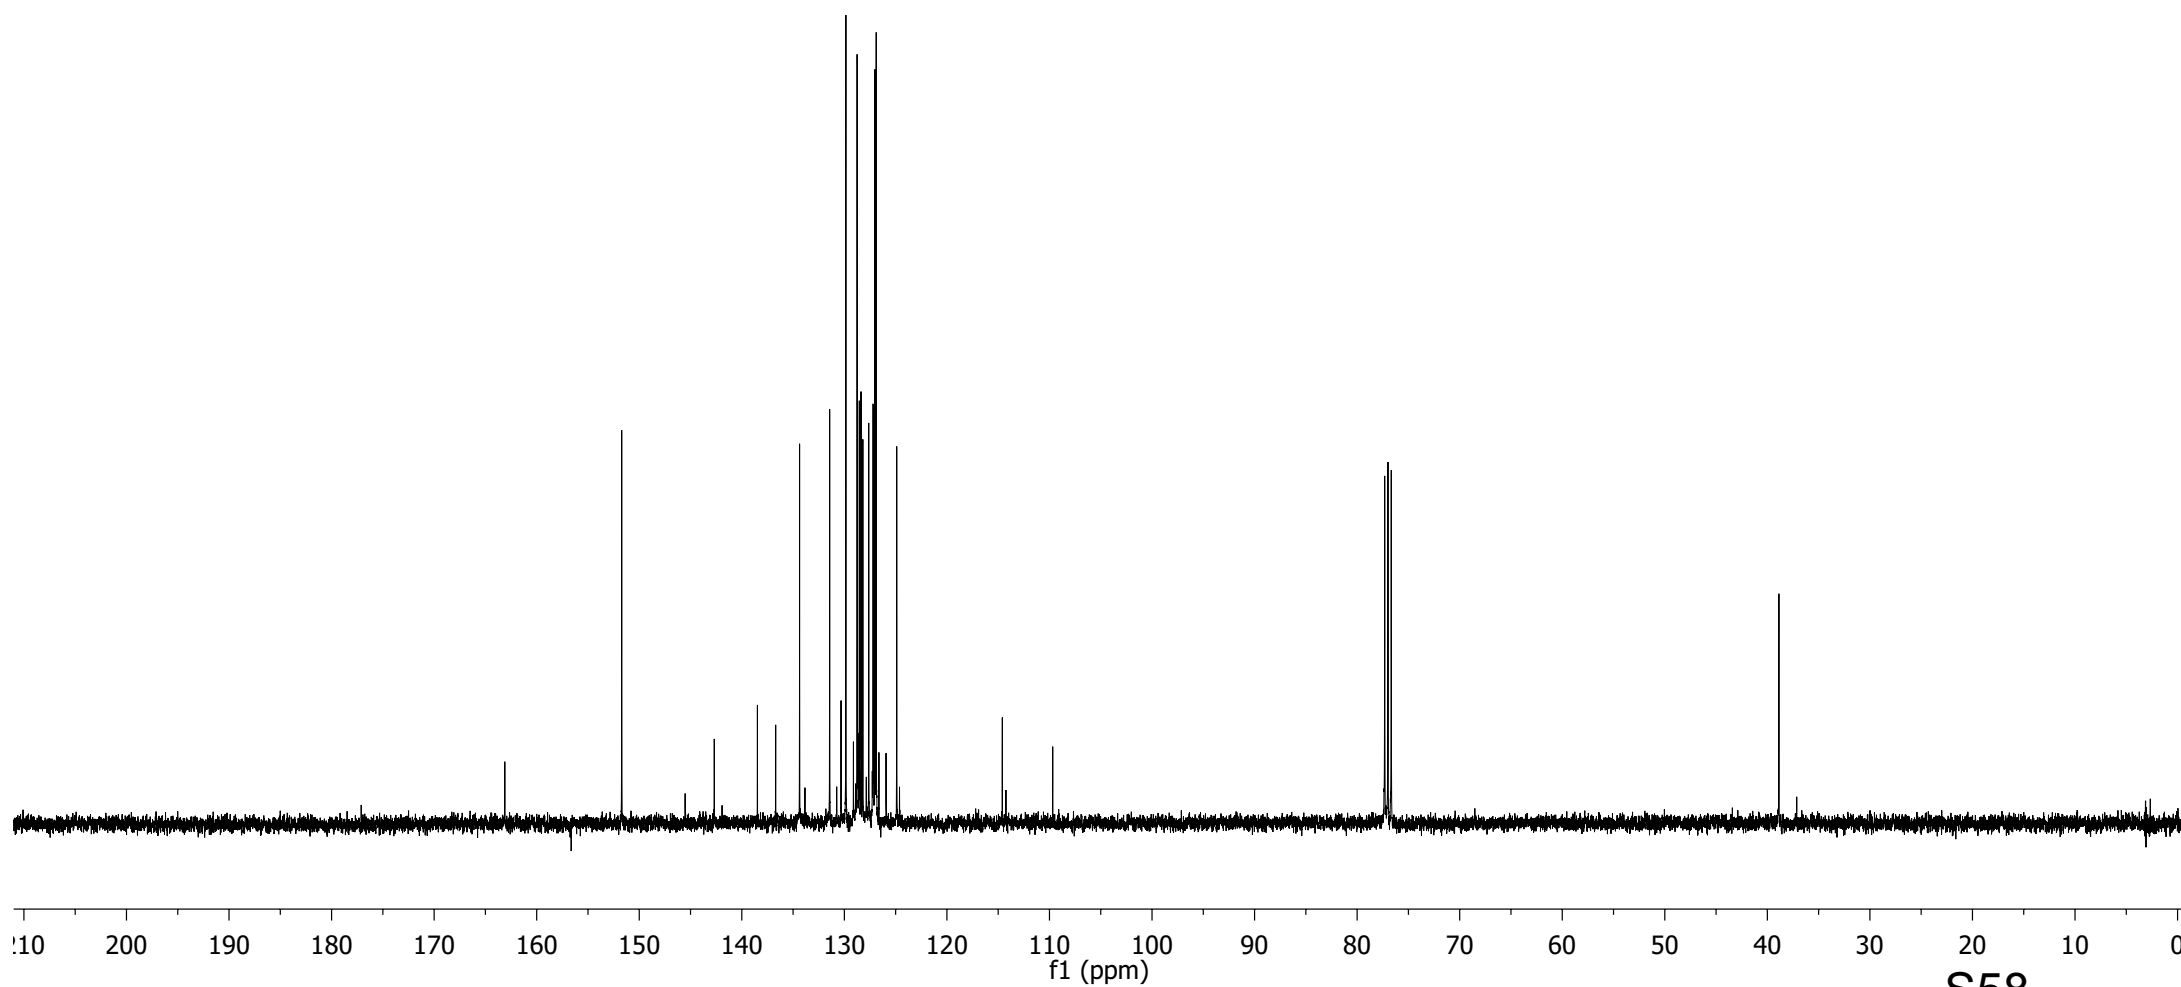

Solvent  $\text{CDCl}_3$   
Spectrometer Frequency 400

8.28  
7.52  
7.50  
7.48  
7.42  
7.40  
7.39  
7.37  
7.36  
7.36  
7.26  
7.25  
7.24  
7.24  
7.22  
7.05  
6.00  
5.99

3.45  
3.31  
3.30  
3.22

0.00

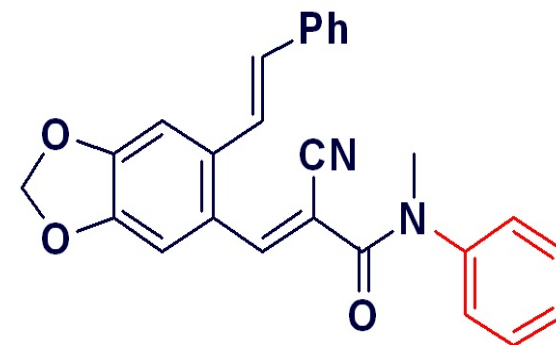

**1b**

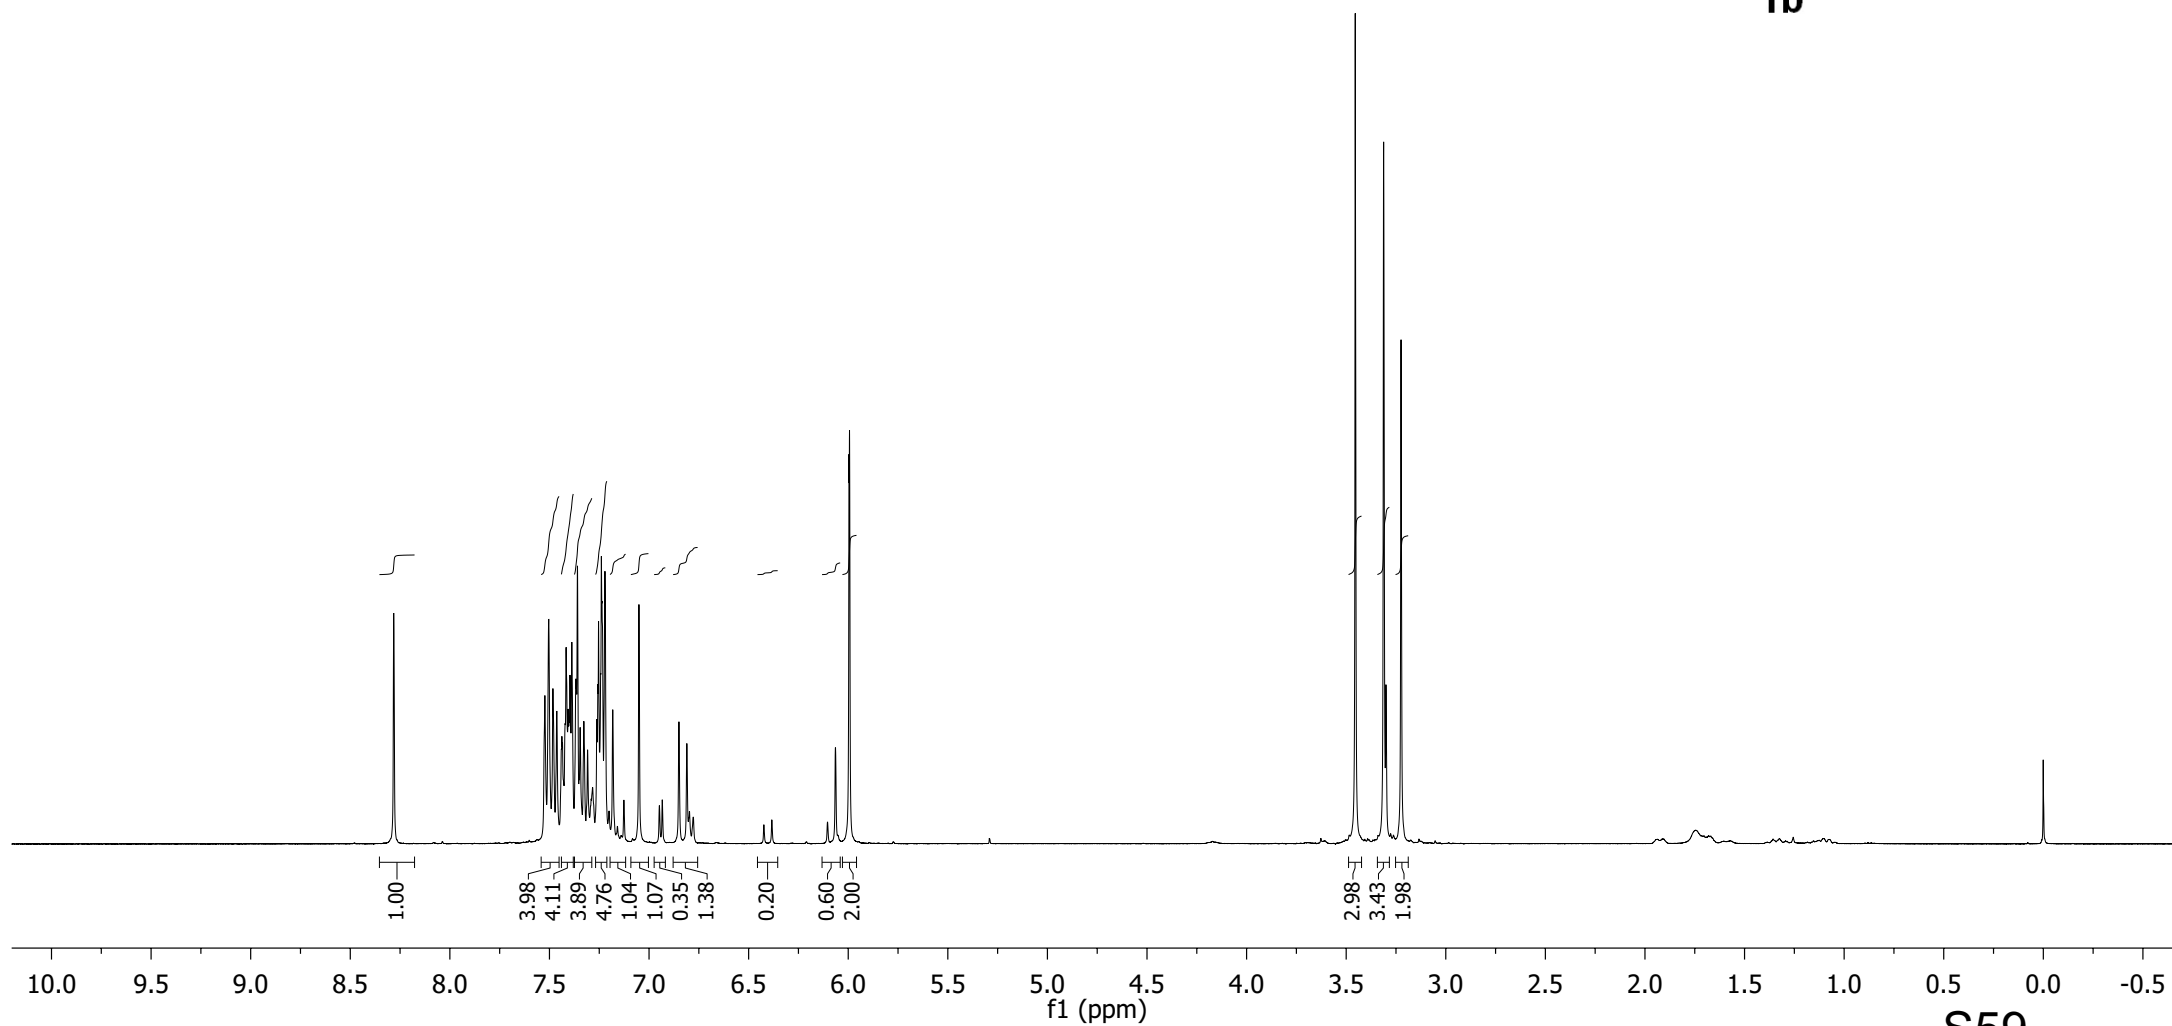

Solvent  $\text{CDCl}_3$   
Spectrometer Frequency 100



**1b**

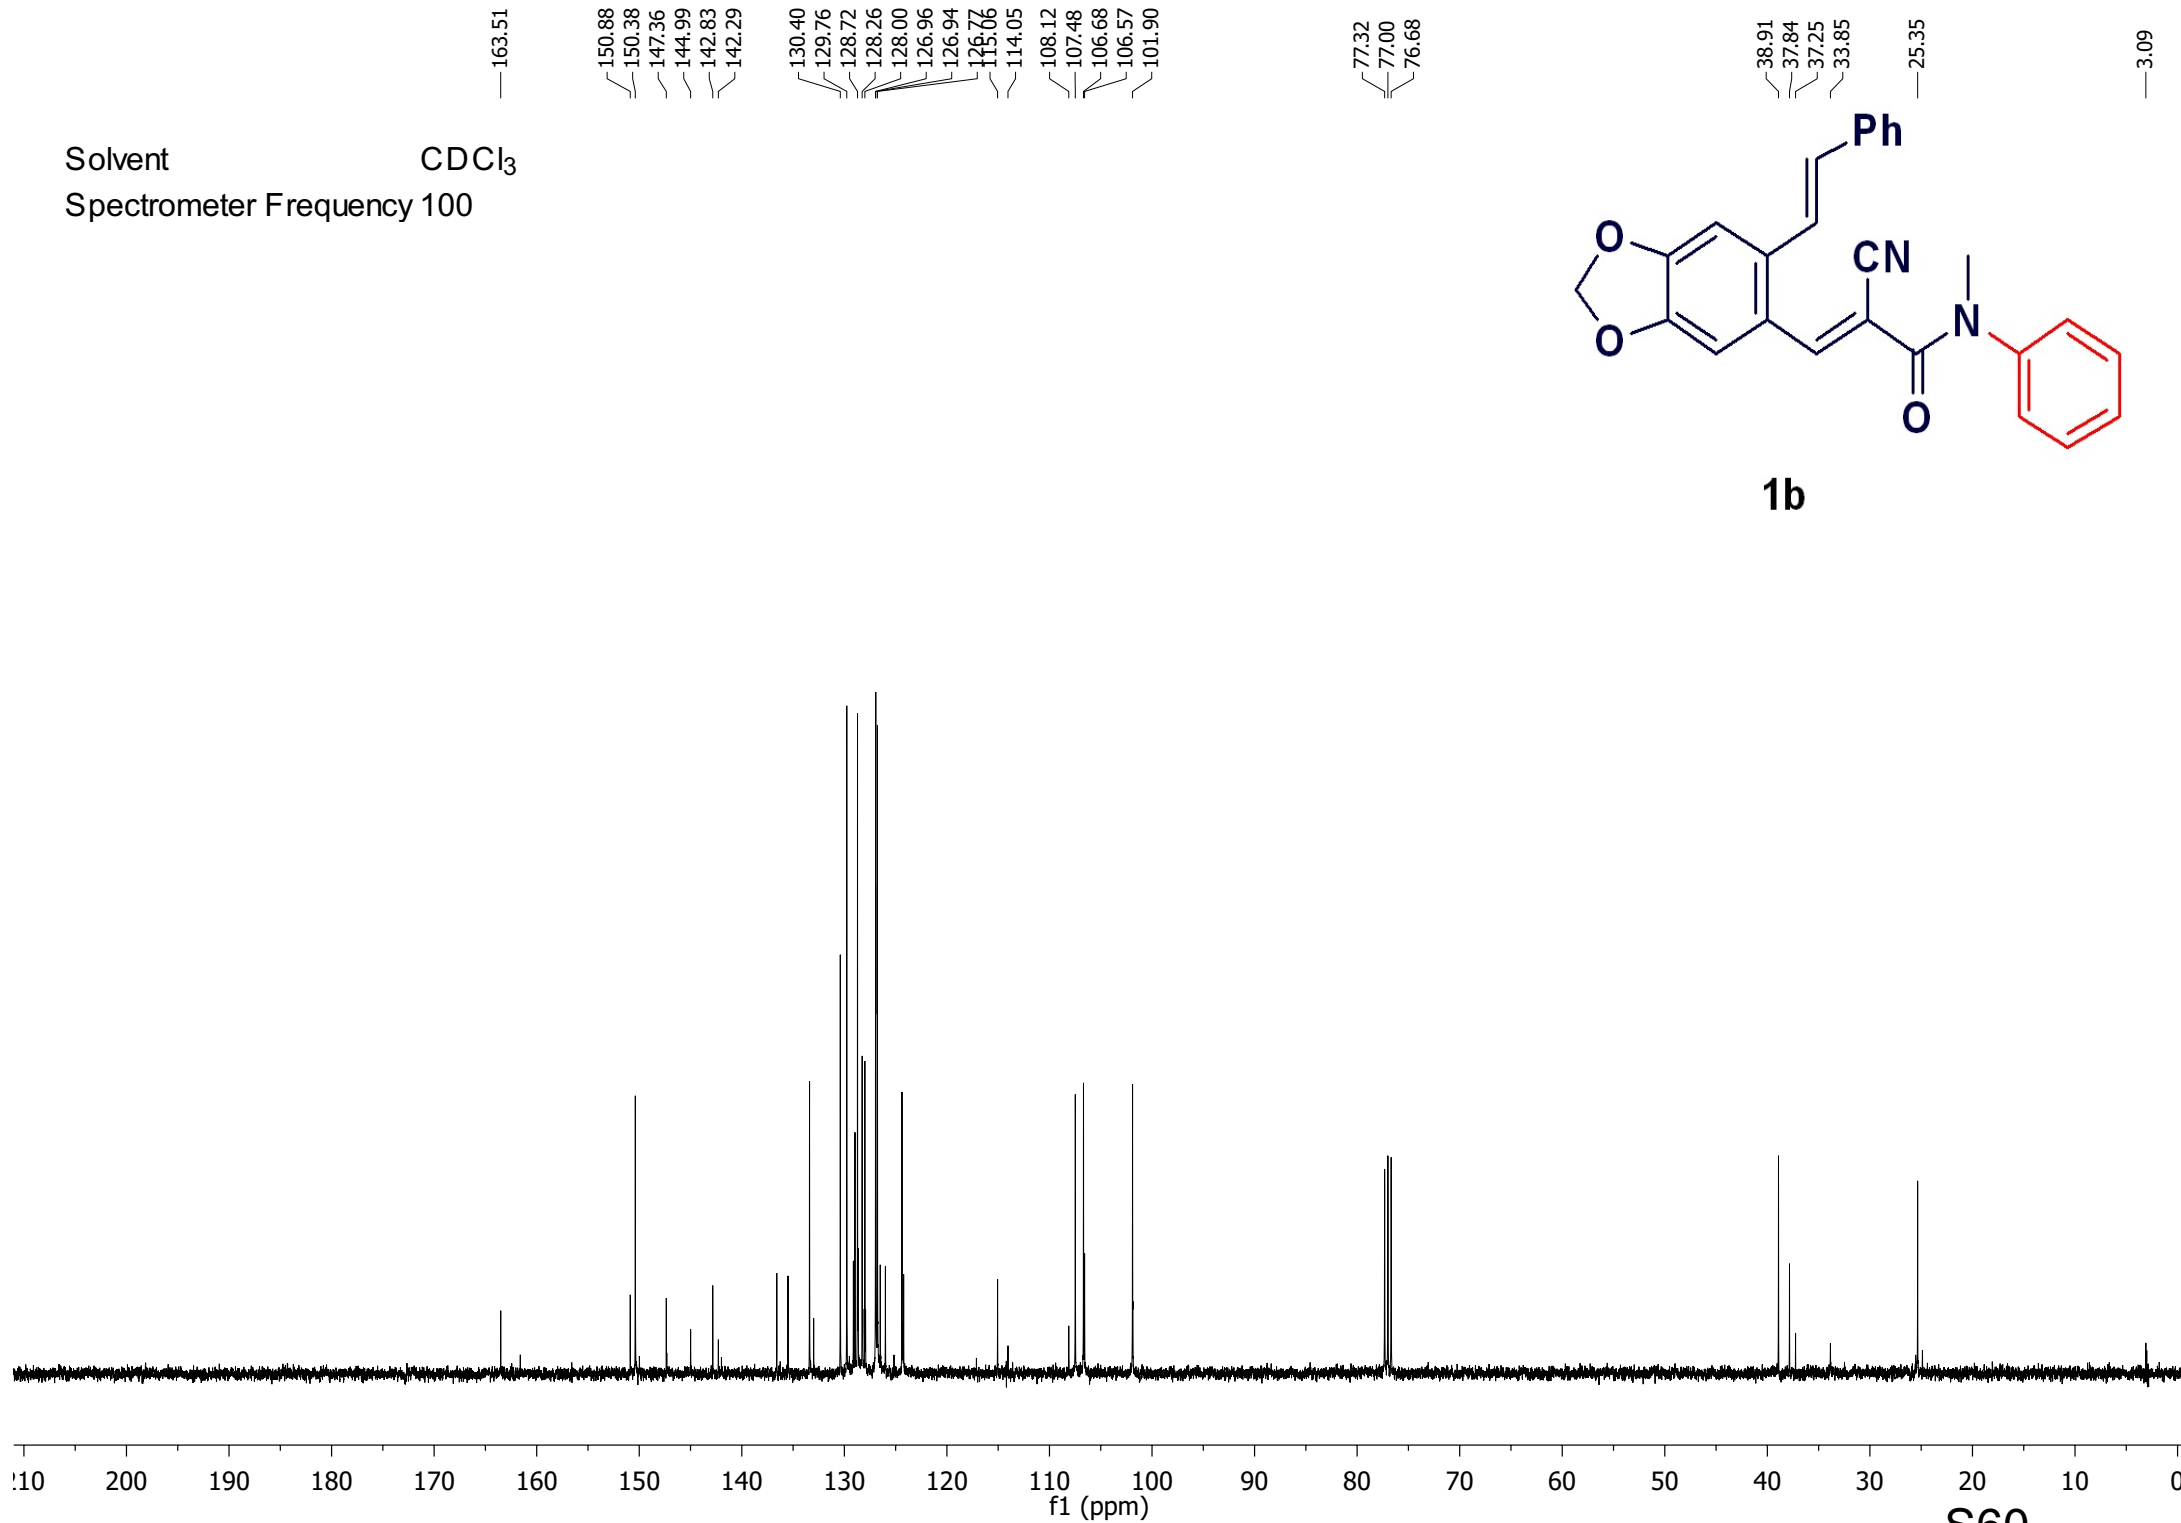

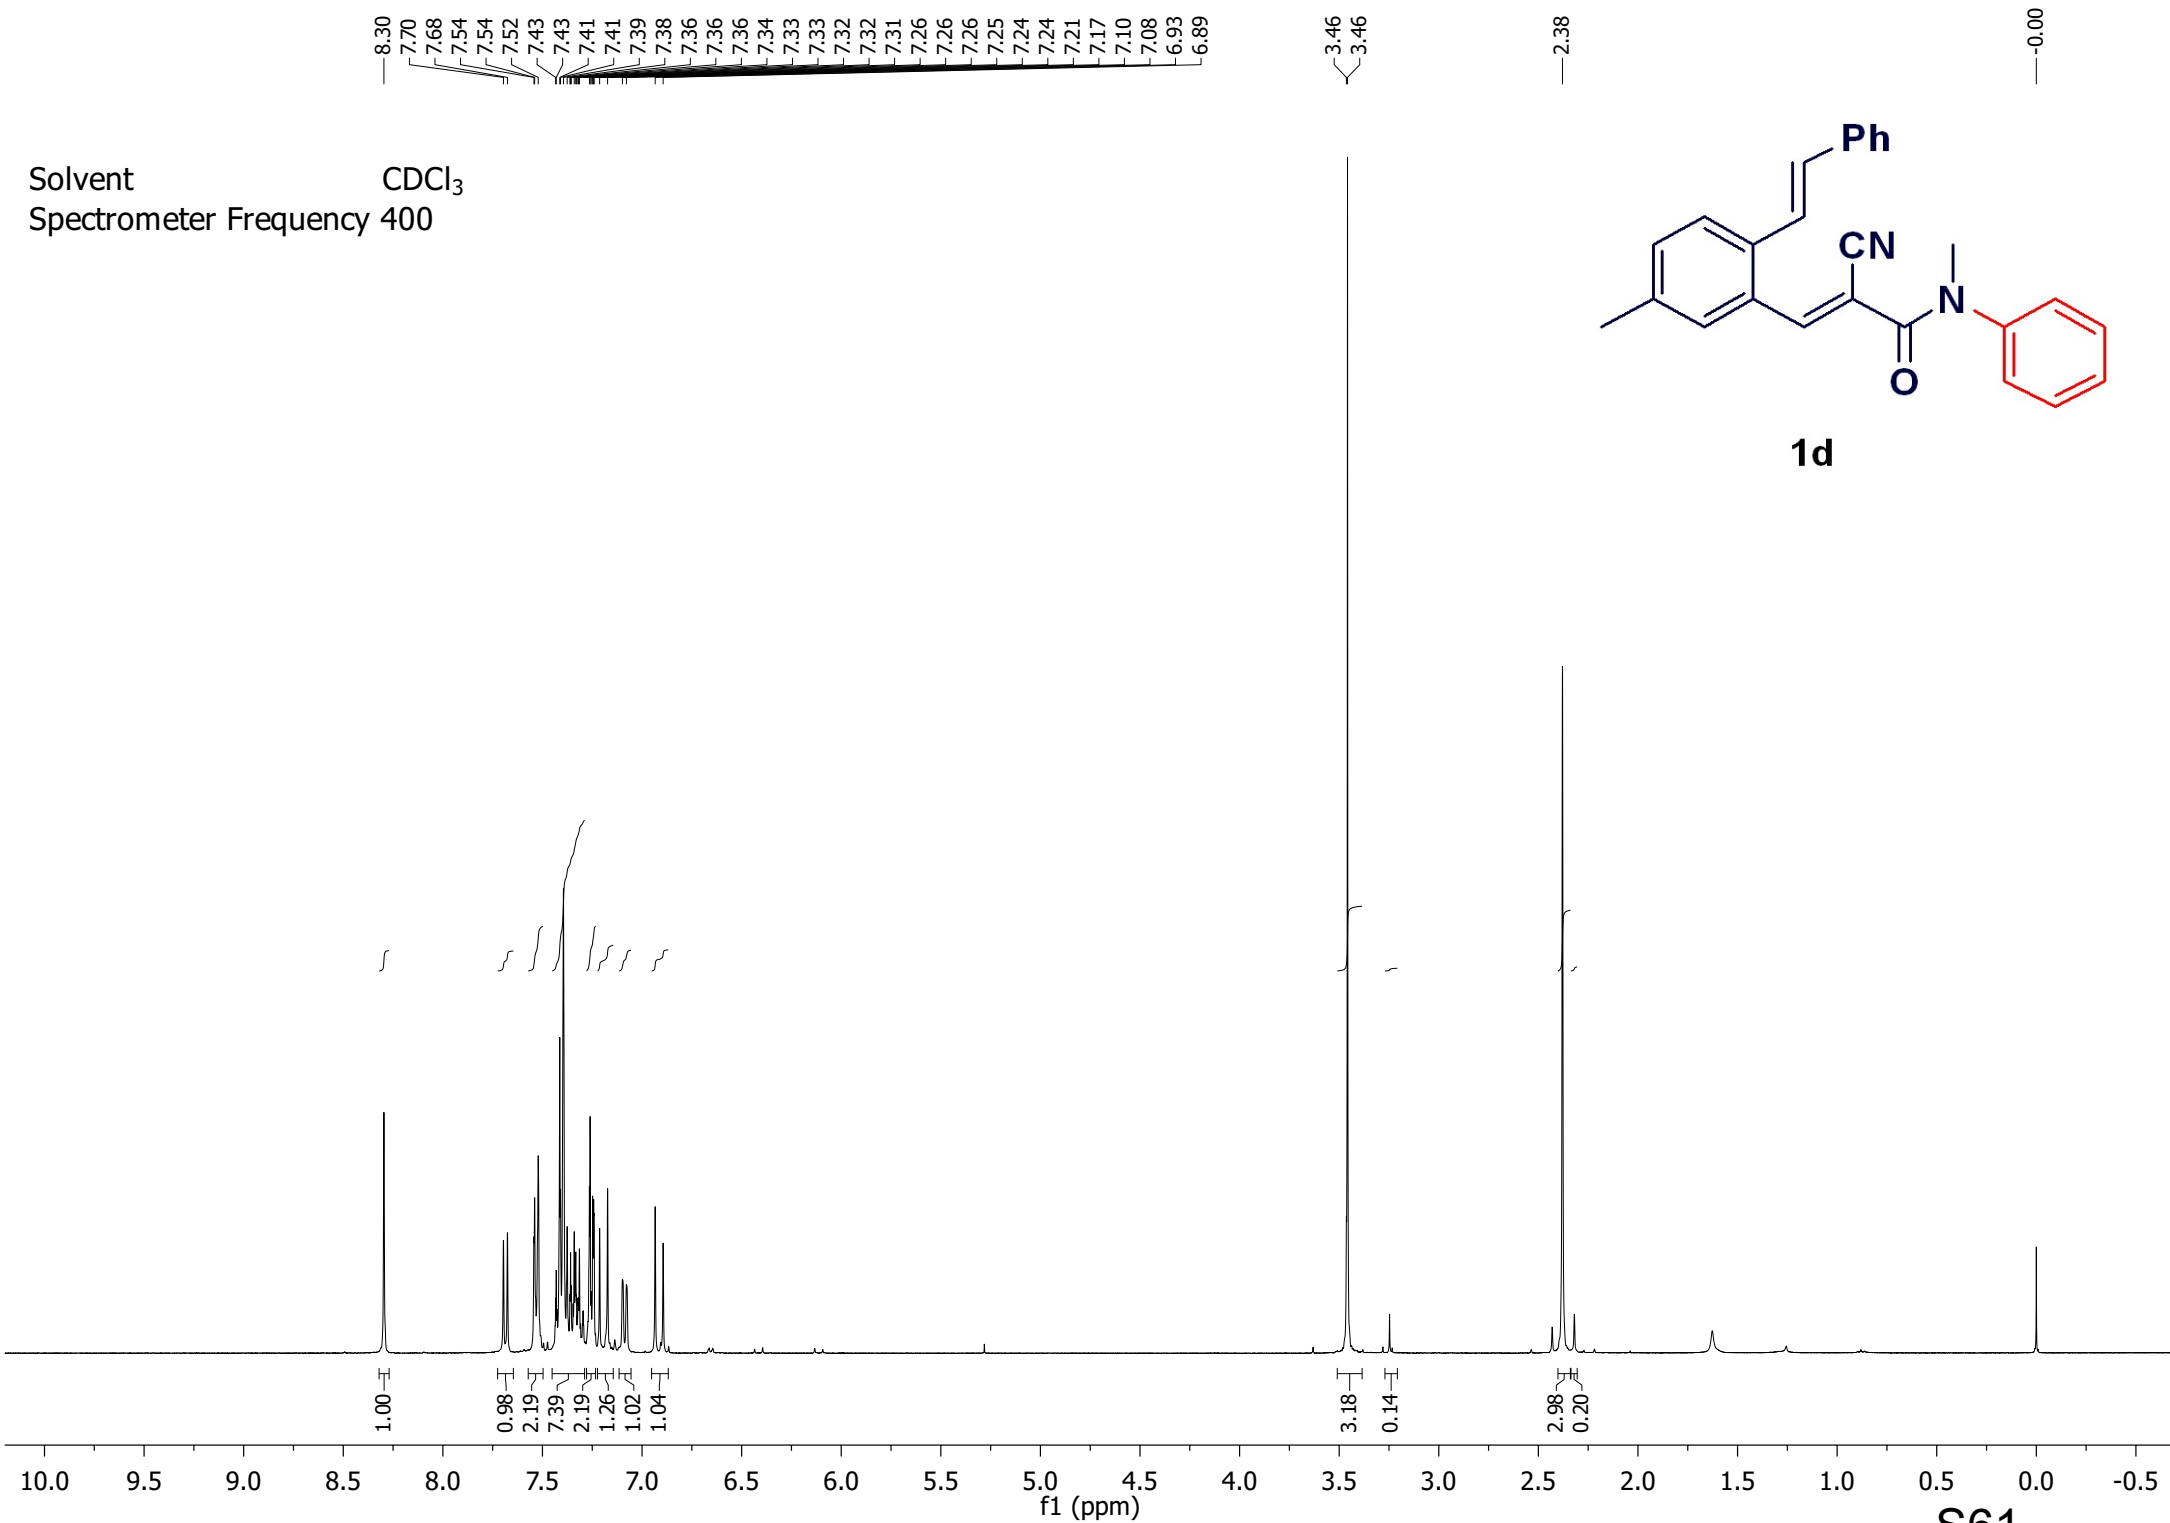

Solvent  $\text{CDCl}_3$   
Spectrometer Frequency 100

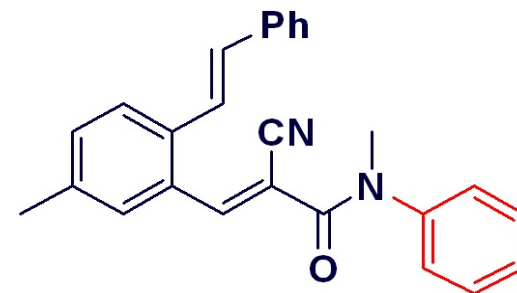

**1d**

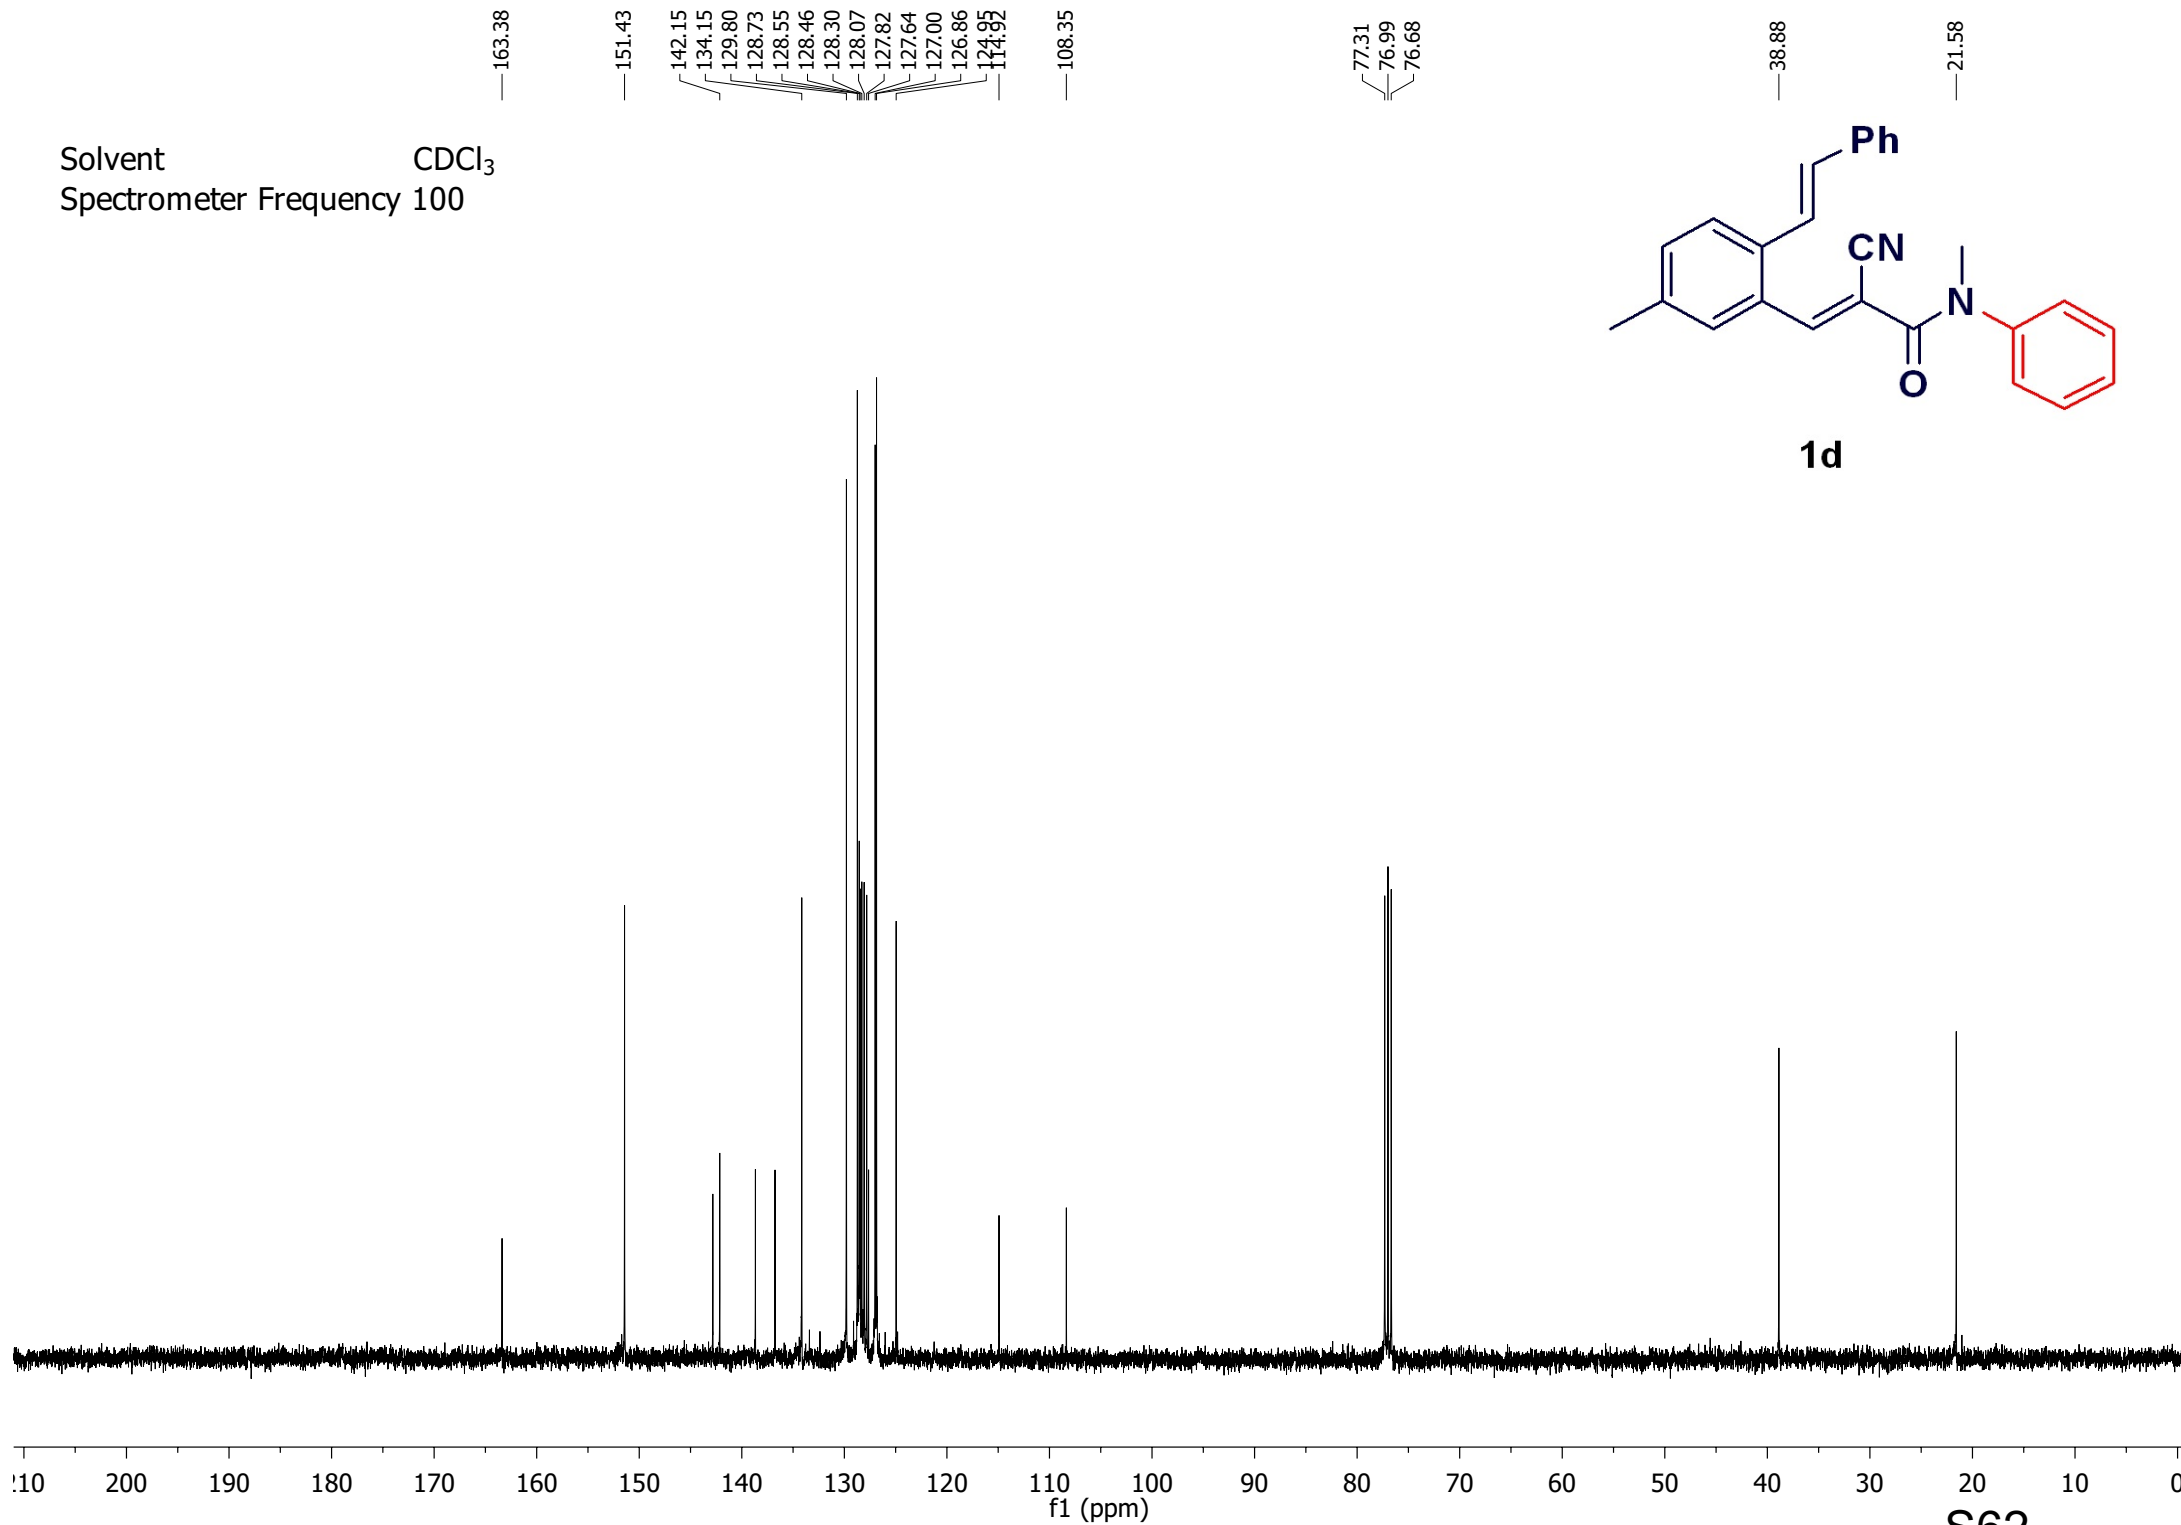

Solvent CDCl<sub>3</sub>  
Spectrometer Frequency 400

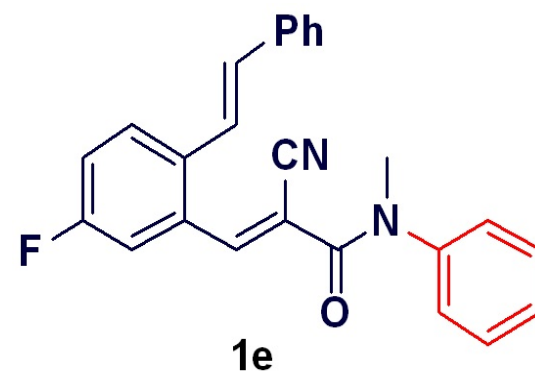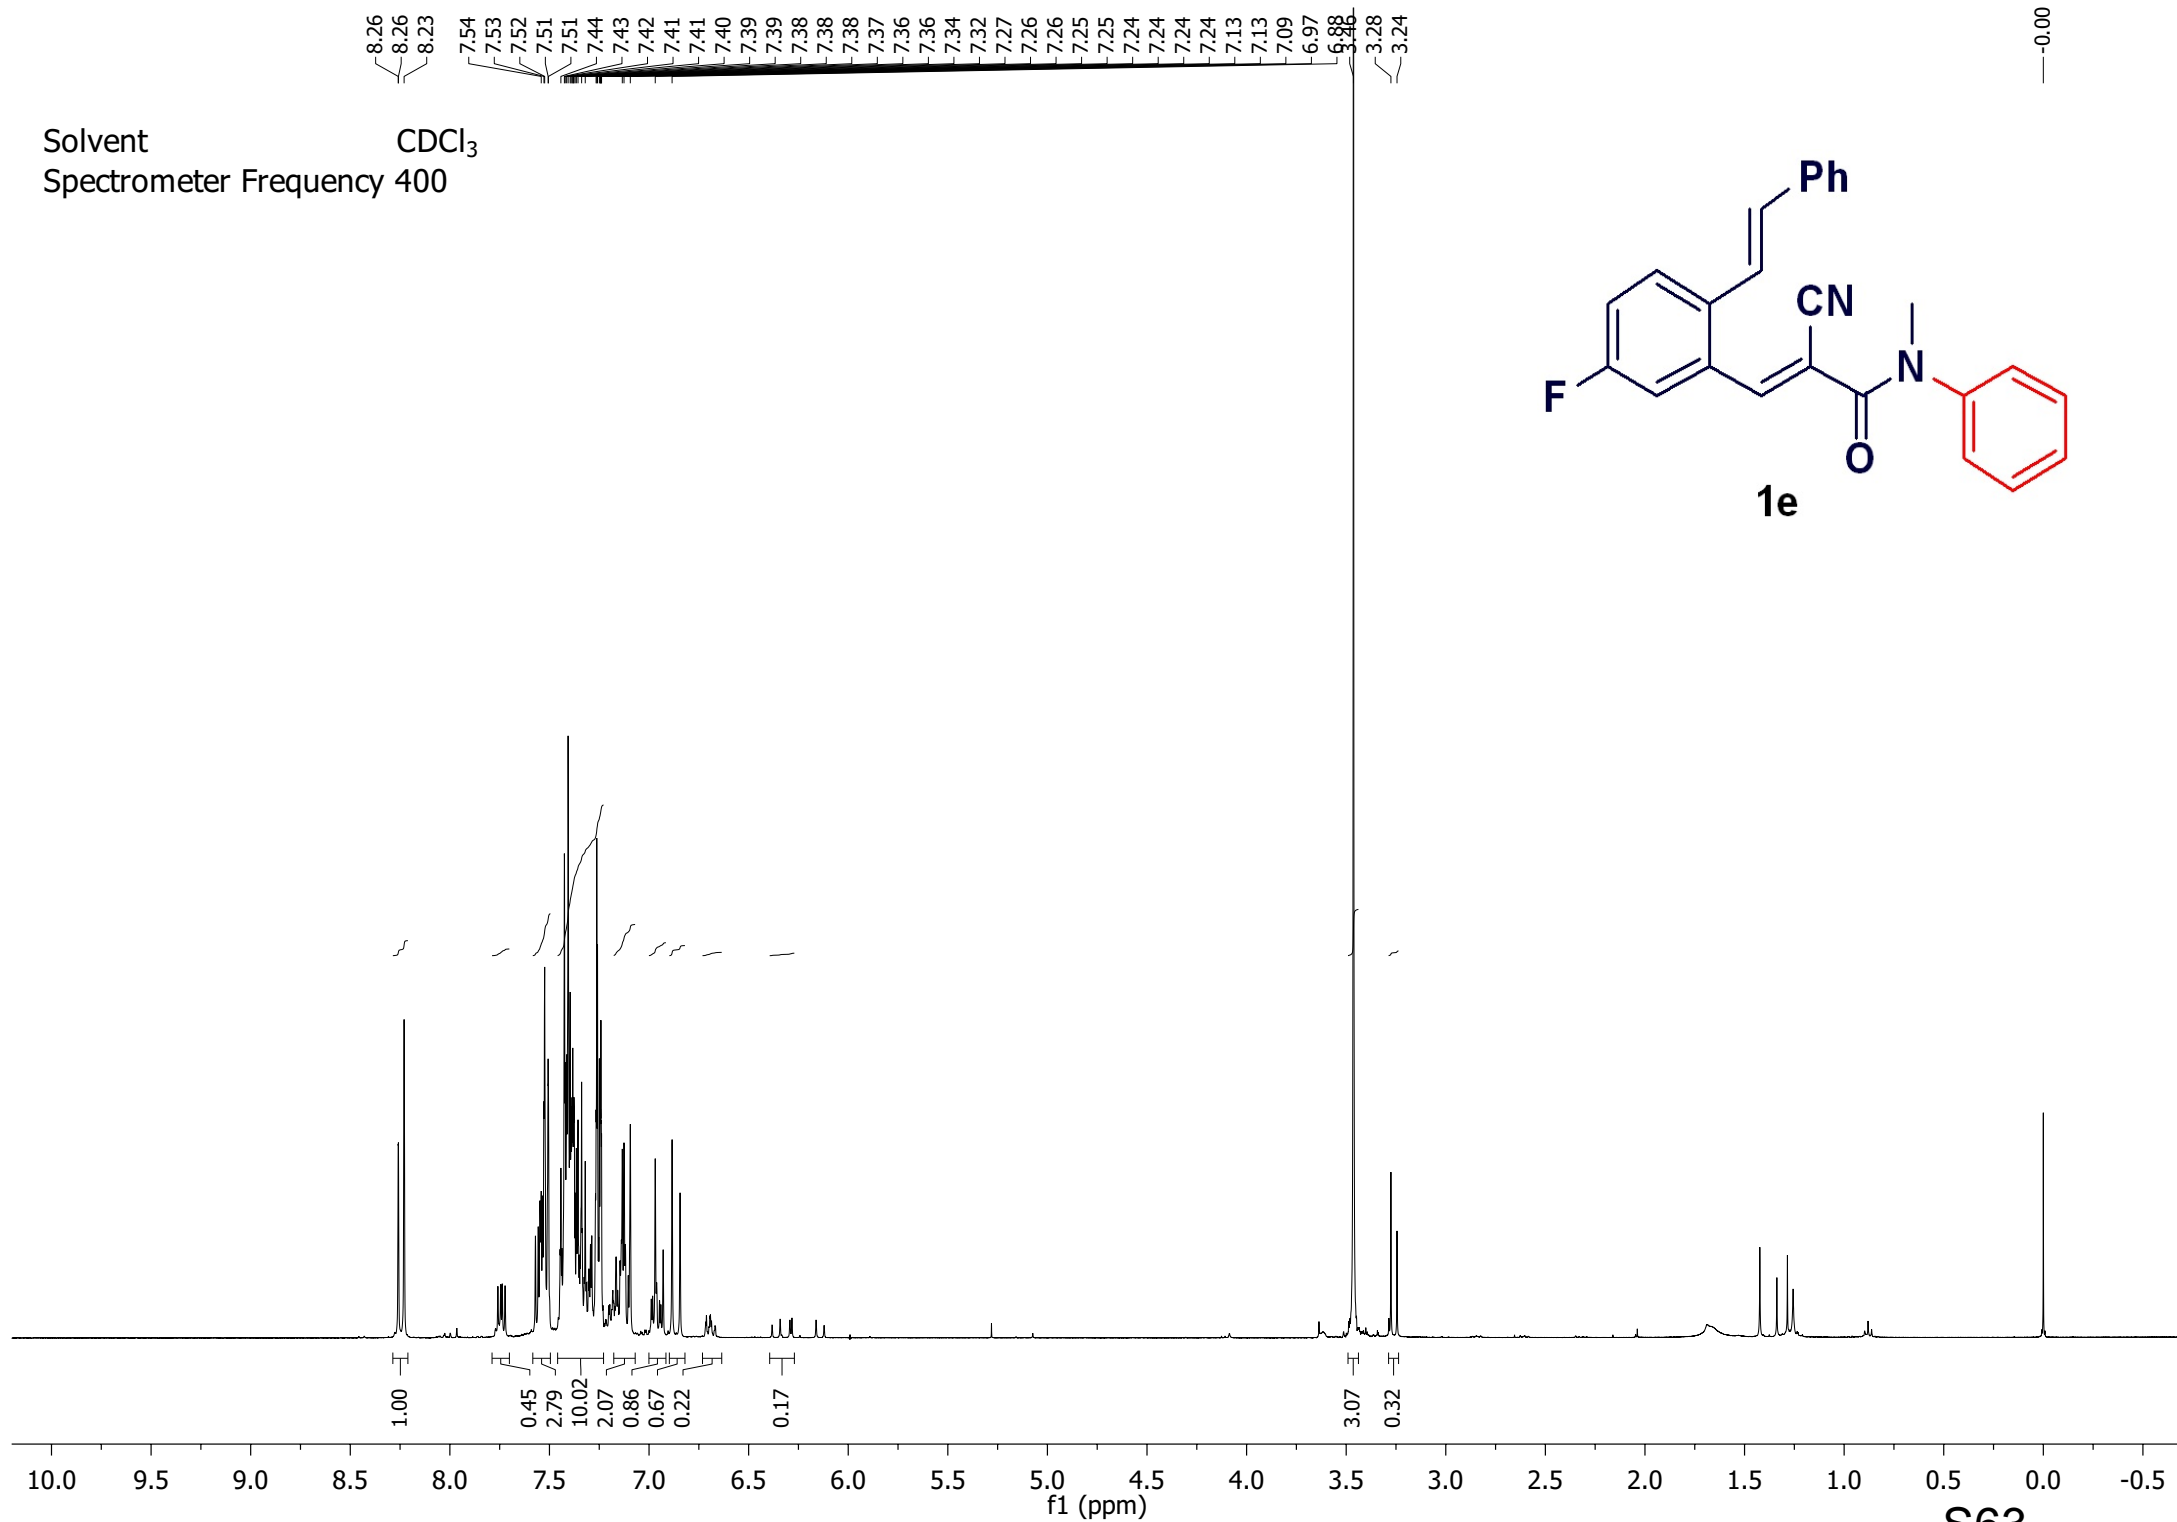

Solvent  $\text{CDCl}_3$   
Spectrometer Frequency 100

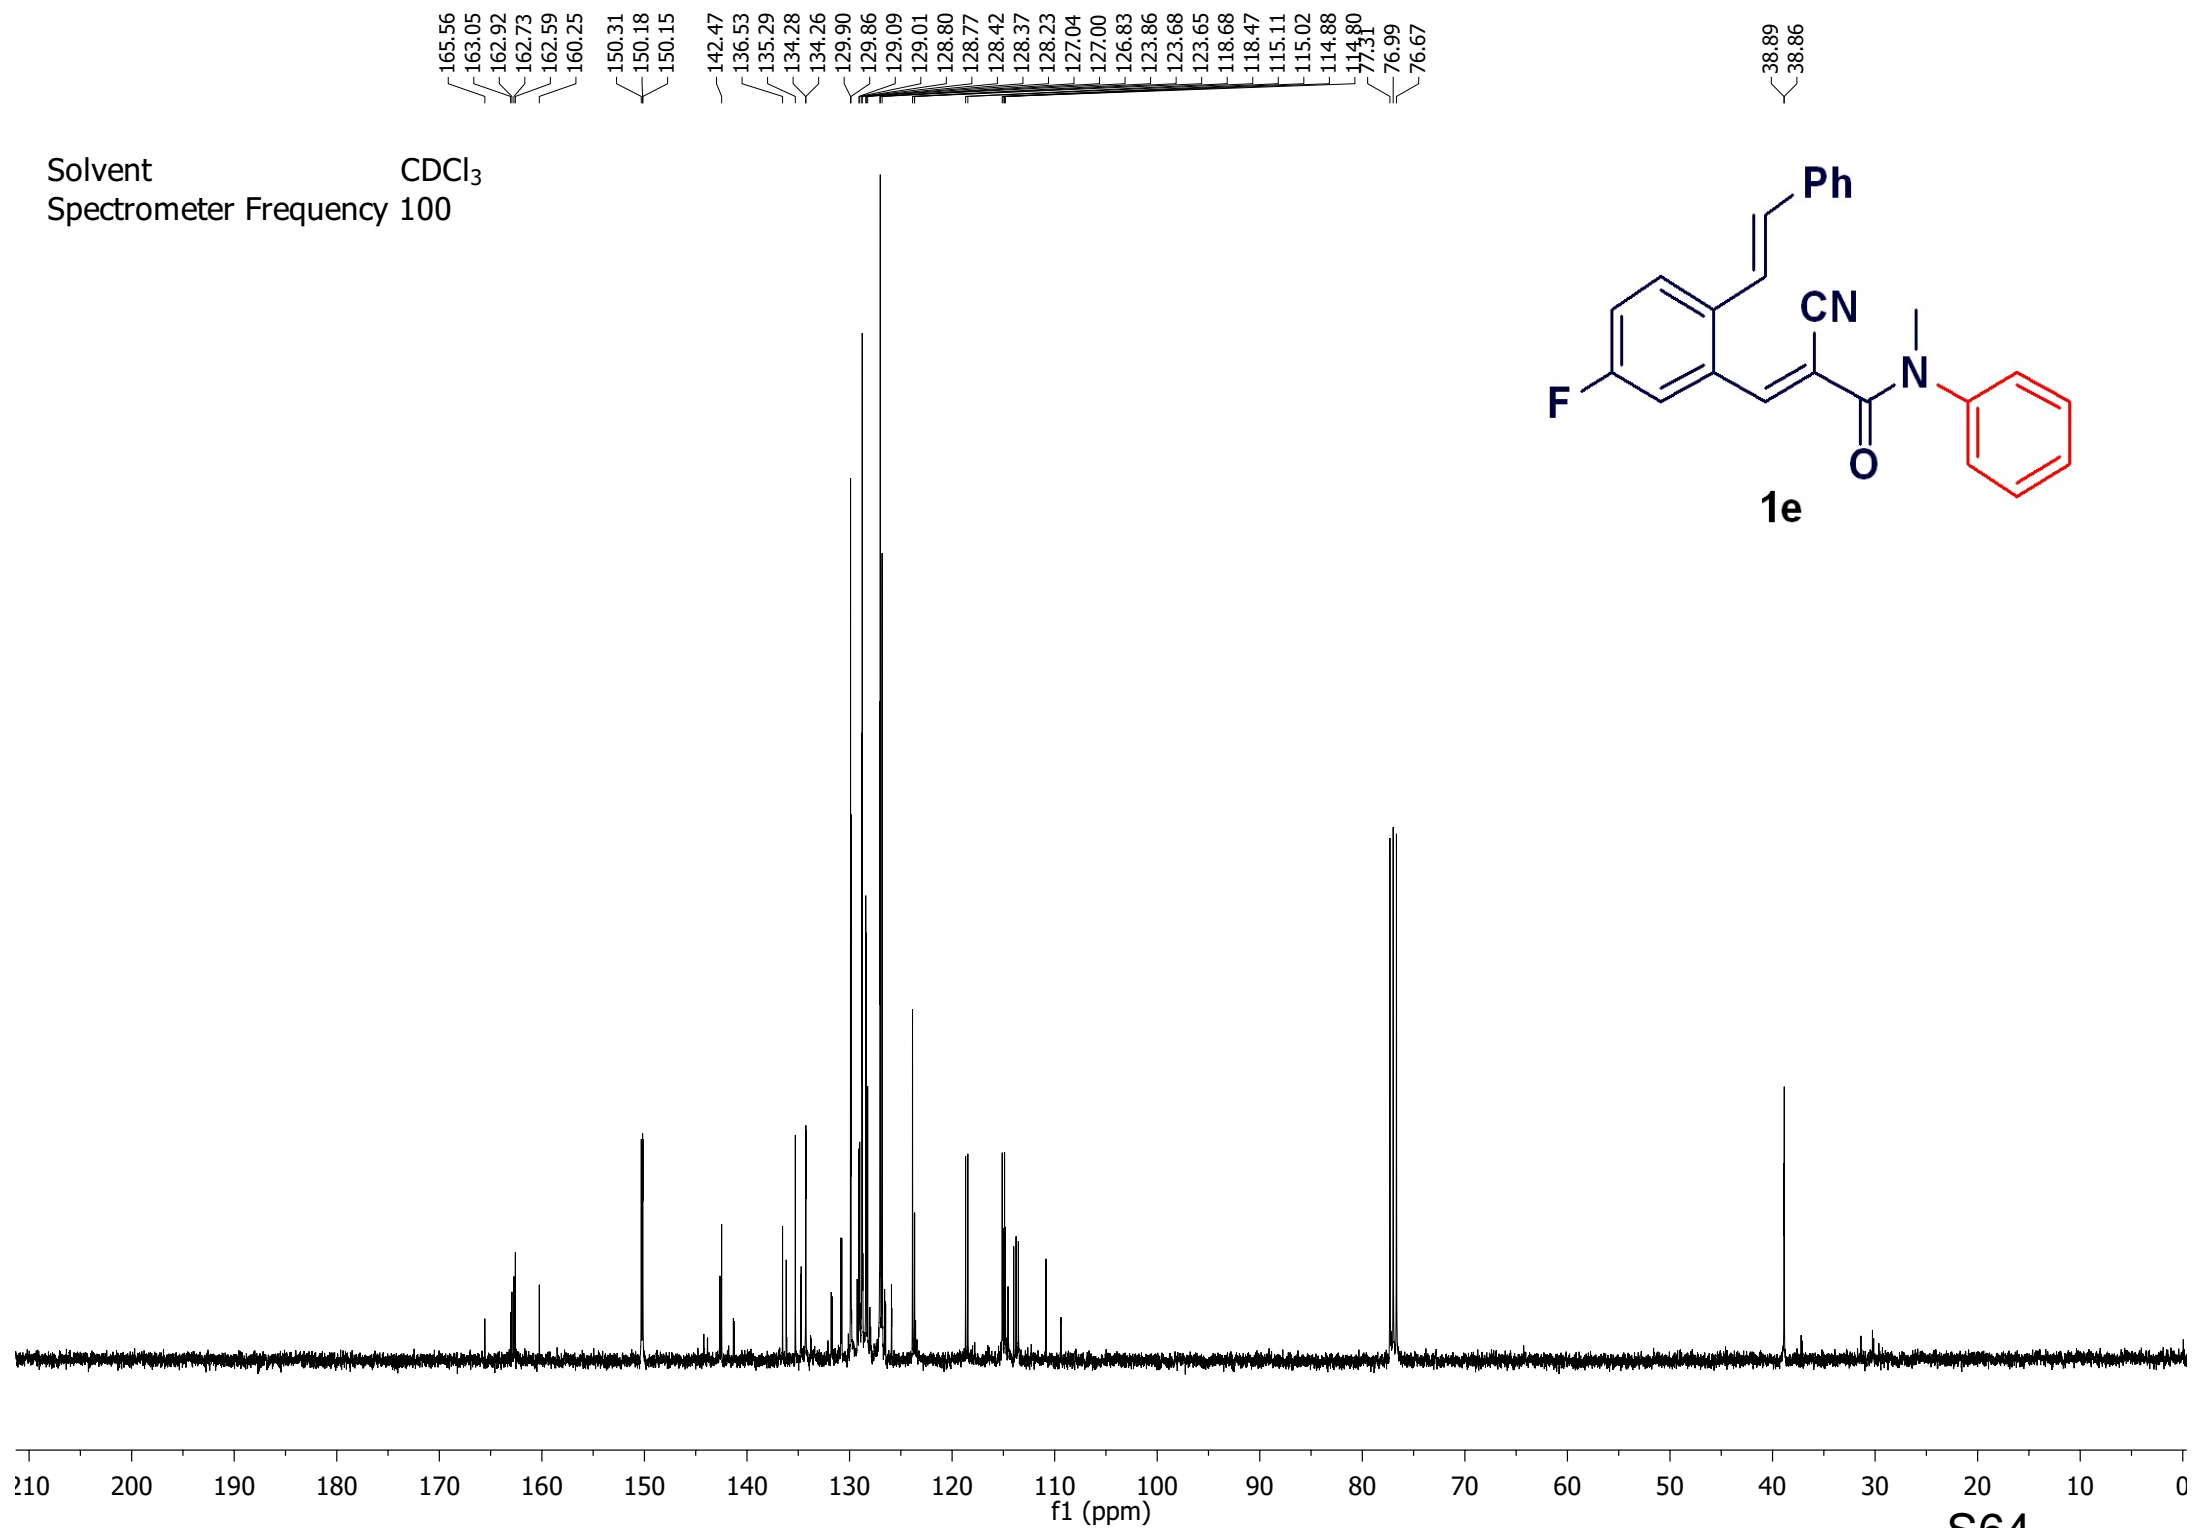

Solvent  $\text{CDCl}_3$   
Spectrometer Frequency 400

8.29  
7.50  
7.49  
7.41  
7.40  
7.40  
7.39  
7.38  
7.28  
7.27  
7.27  
7.25  
7.25  
6.35  
6.06  
6.02

3.84  
3.76  
3.46  
3.25

1.73

-0.00

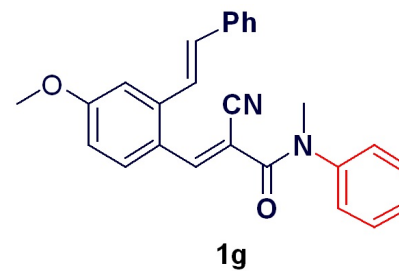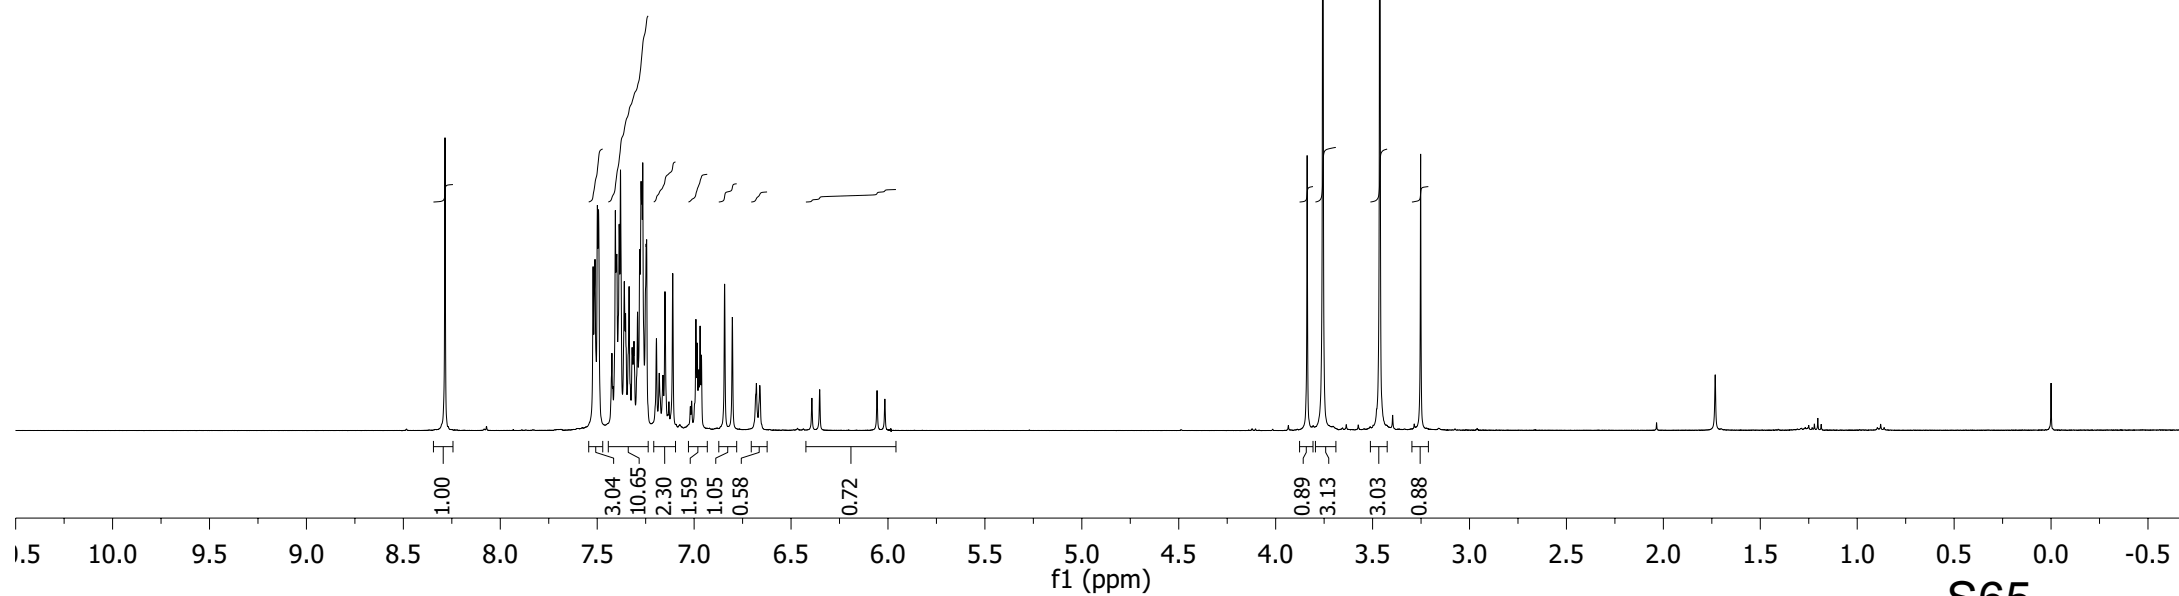

S65

Solvent  $\text{CDCl}_3$   
Spectrometer Frequency 100

162.99  
162.26  
158.65  
151.22  
132.42  
129.77  
129.14  
128.65  
128.58  
128.42  
128.14  
127.96  
126.96  
126.62  
124.35  
118.78  
117.99  
116.78  
114.64  
112.37  
112.04  
111.17  
109.45

77.31  
76.99  
76.67

55.51  
55.38

38.81  
37.10

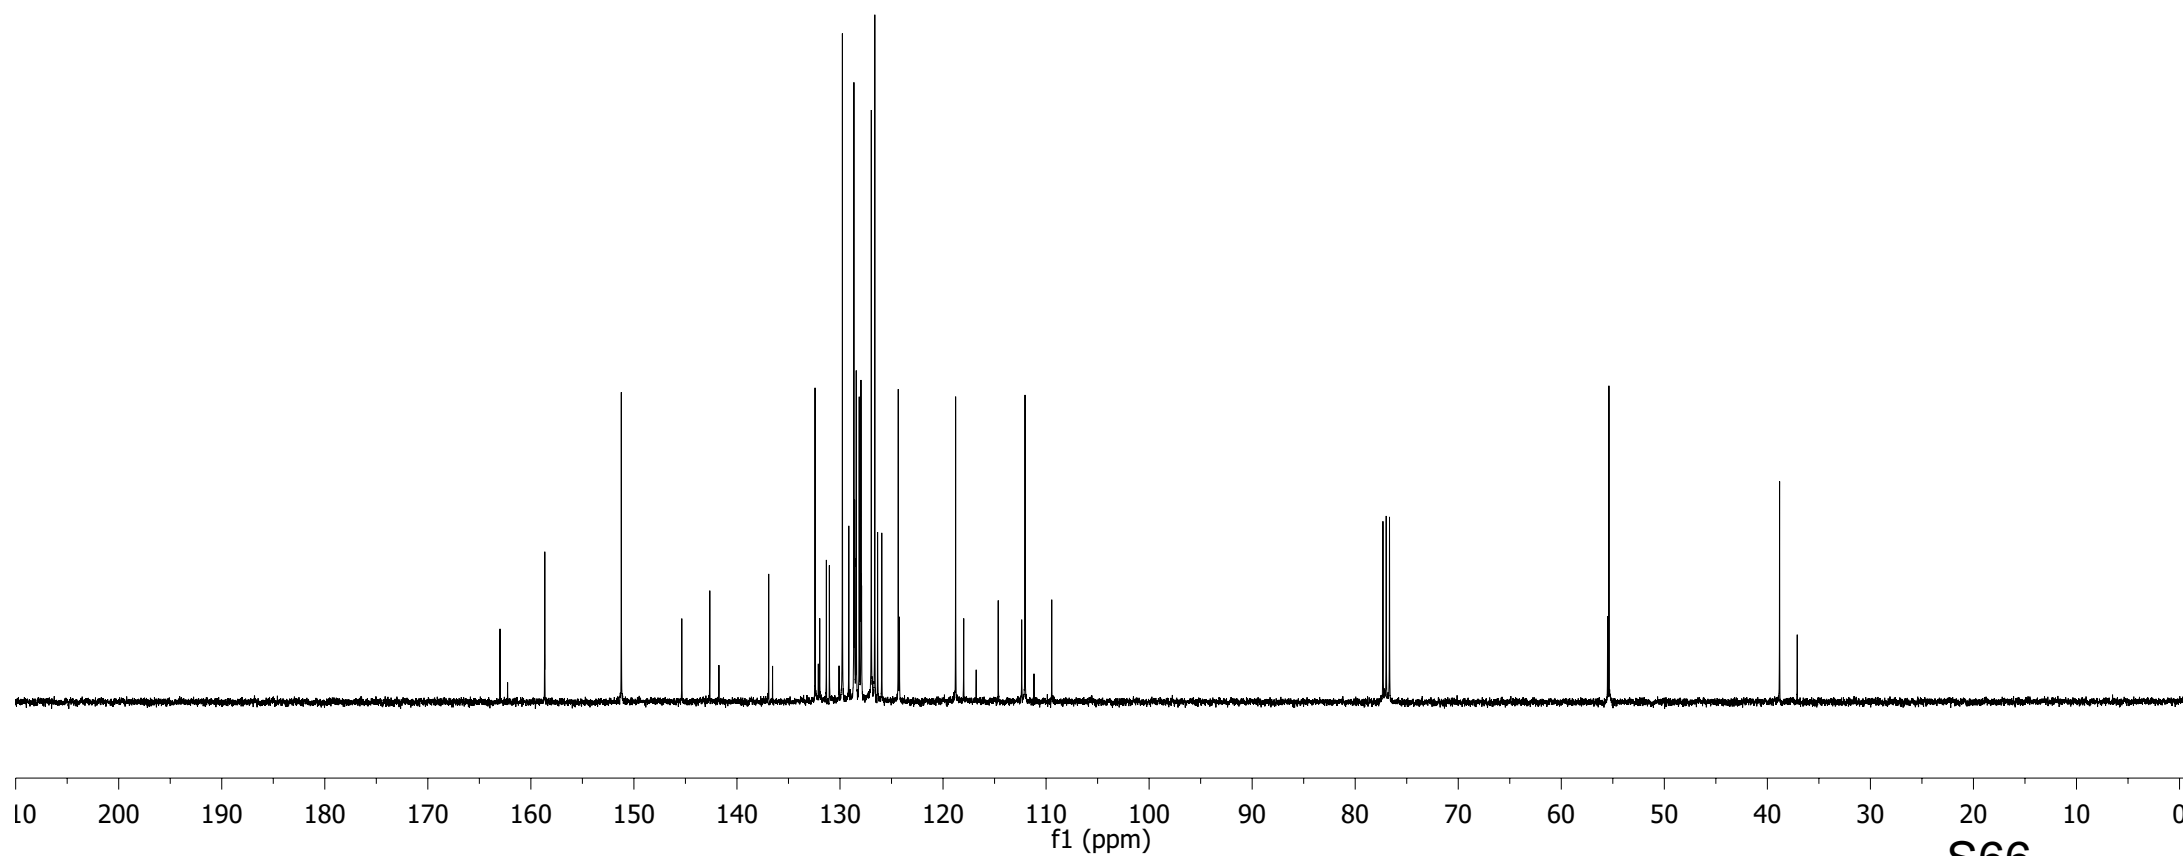

Solvent  $\text{CDCl}_3$   
Spectrometer Frequency 400

8.31  
7.49  
7.46  
7.43  
7.42  
7.41  
7.27  
7.27  
7.25  
7.25  
7.24  
7.03  
6.94  
6.92  
6.89  
6.22  
6.11  
6.07

3.85  
3.84  
3.83  
3.47  
3.45  
3.23

2.04

1.25

0.88

-0.00

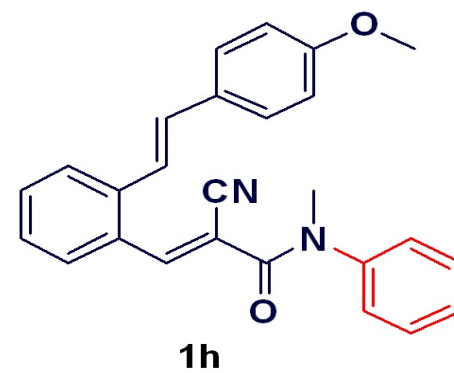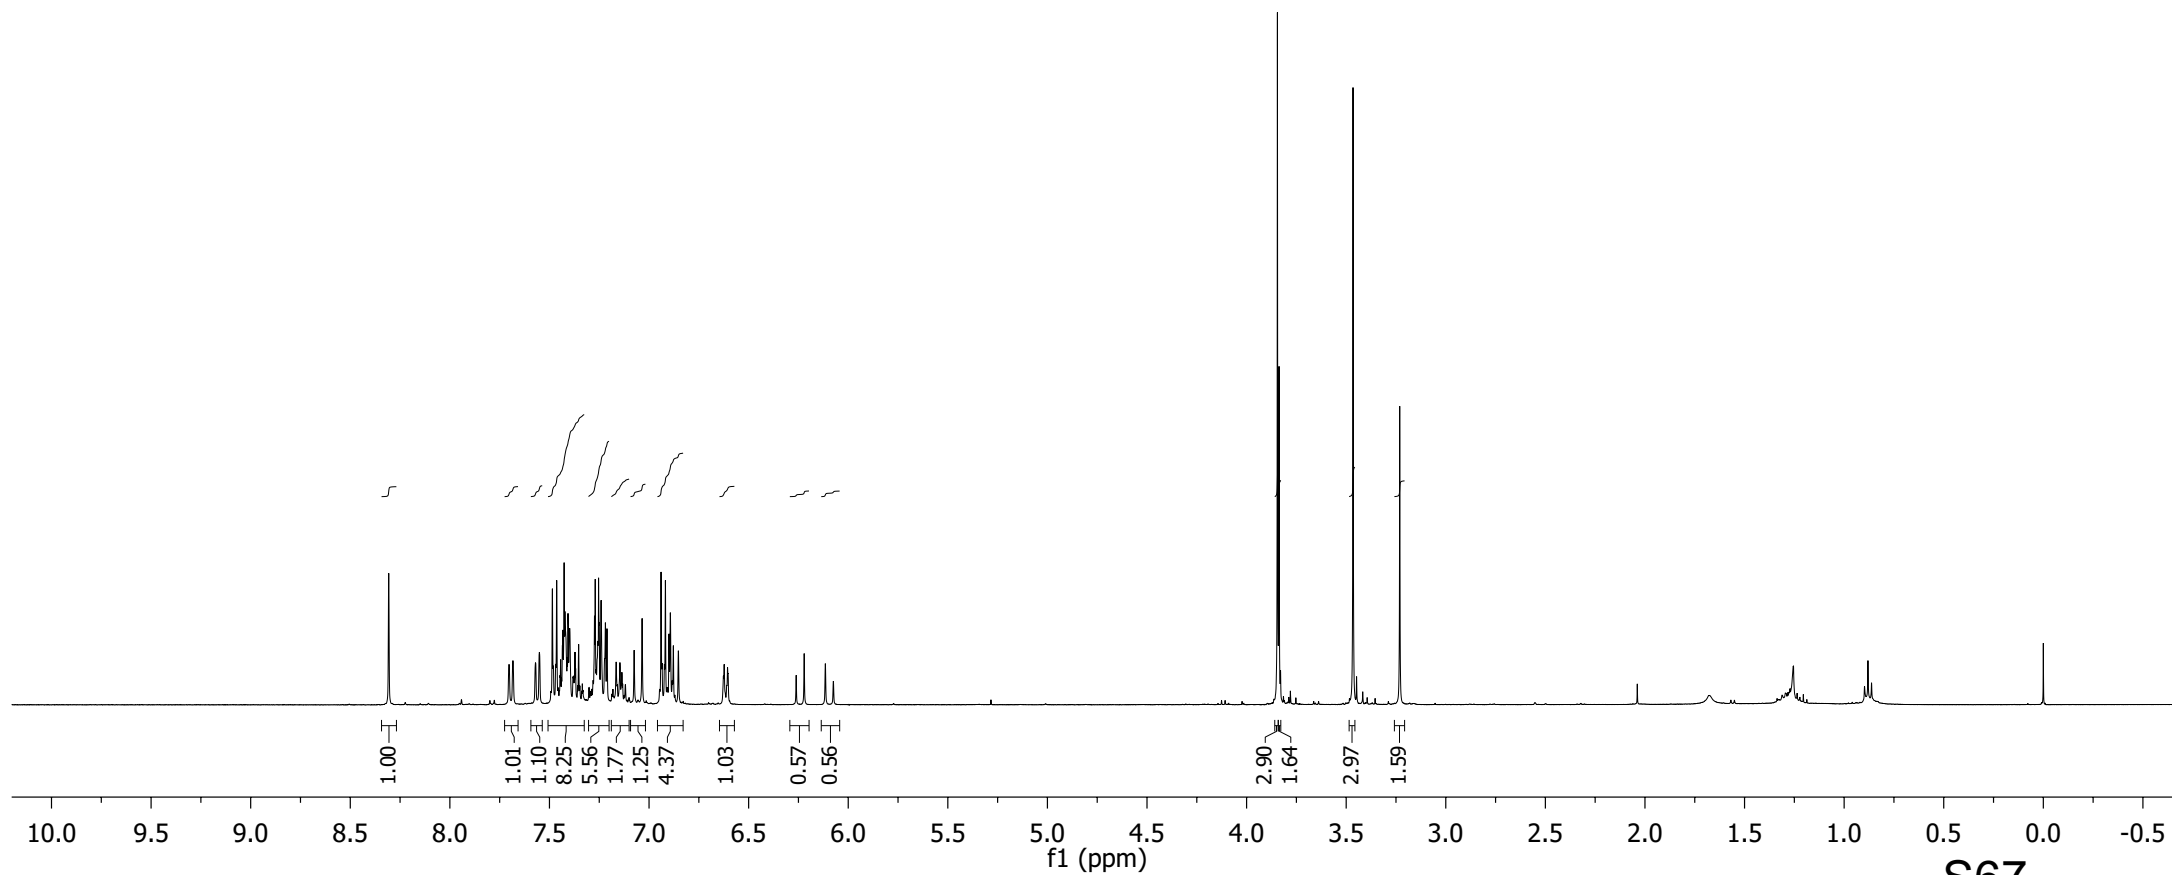

163.17  
162.36  
159.84  
159.79

151.79

133.91

131.38

129.82

129.07

128.20

128.14

127.94

127.19

127.01

126.98

125.93

122.88

116.66

114.66

114.38

114.17

114.10

110.85

109.41

77.31  
76.99  
76.68

55.31

38.83  
37.09

Solvent  $\text{CDCl}_3$   
Spectrometer Frequency 100

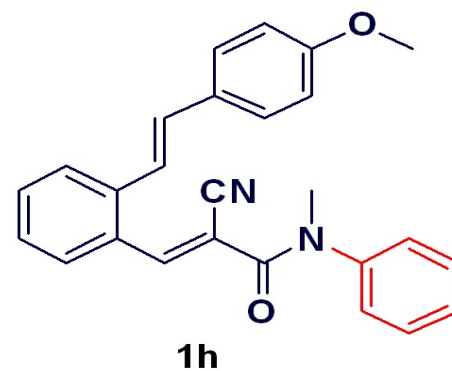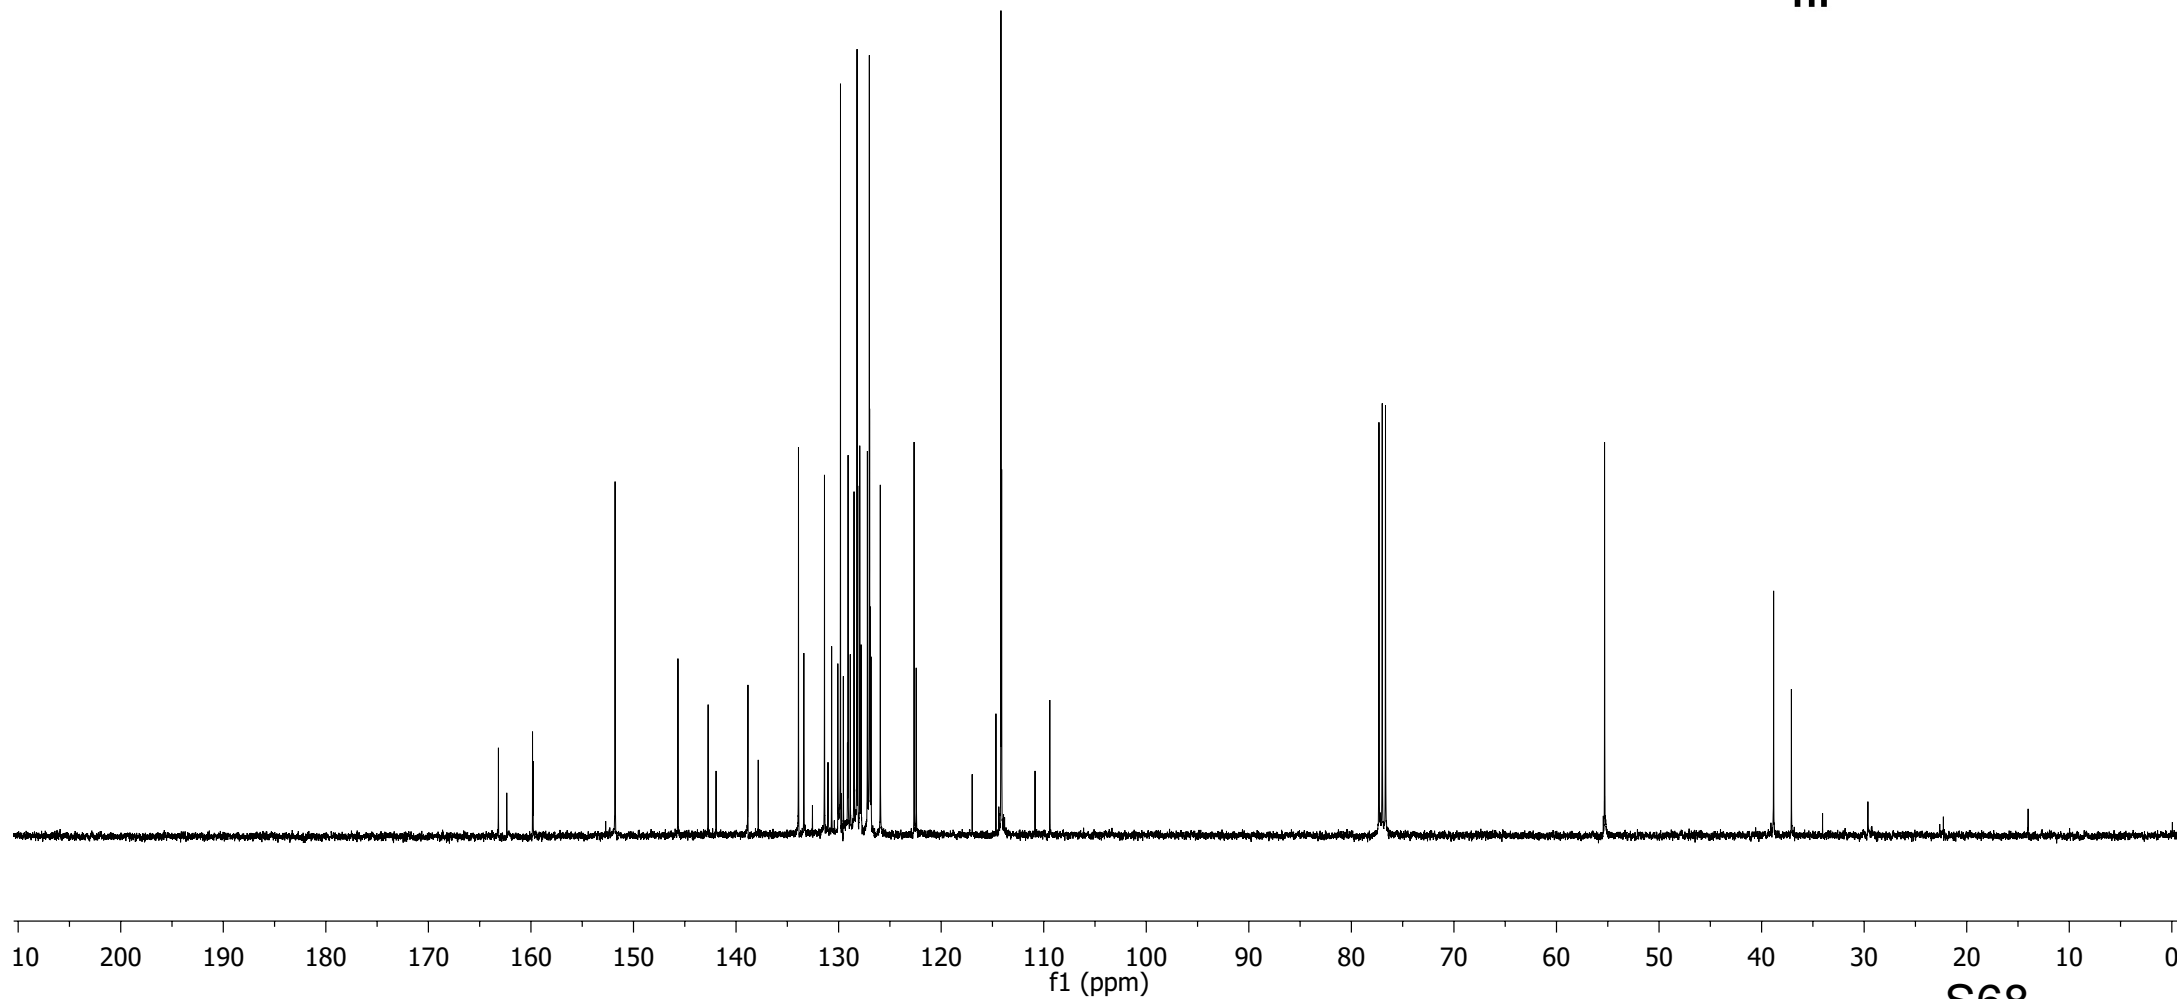

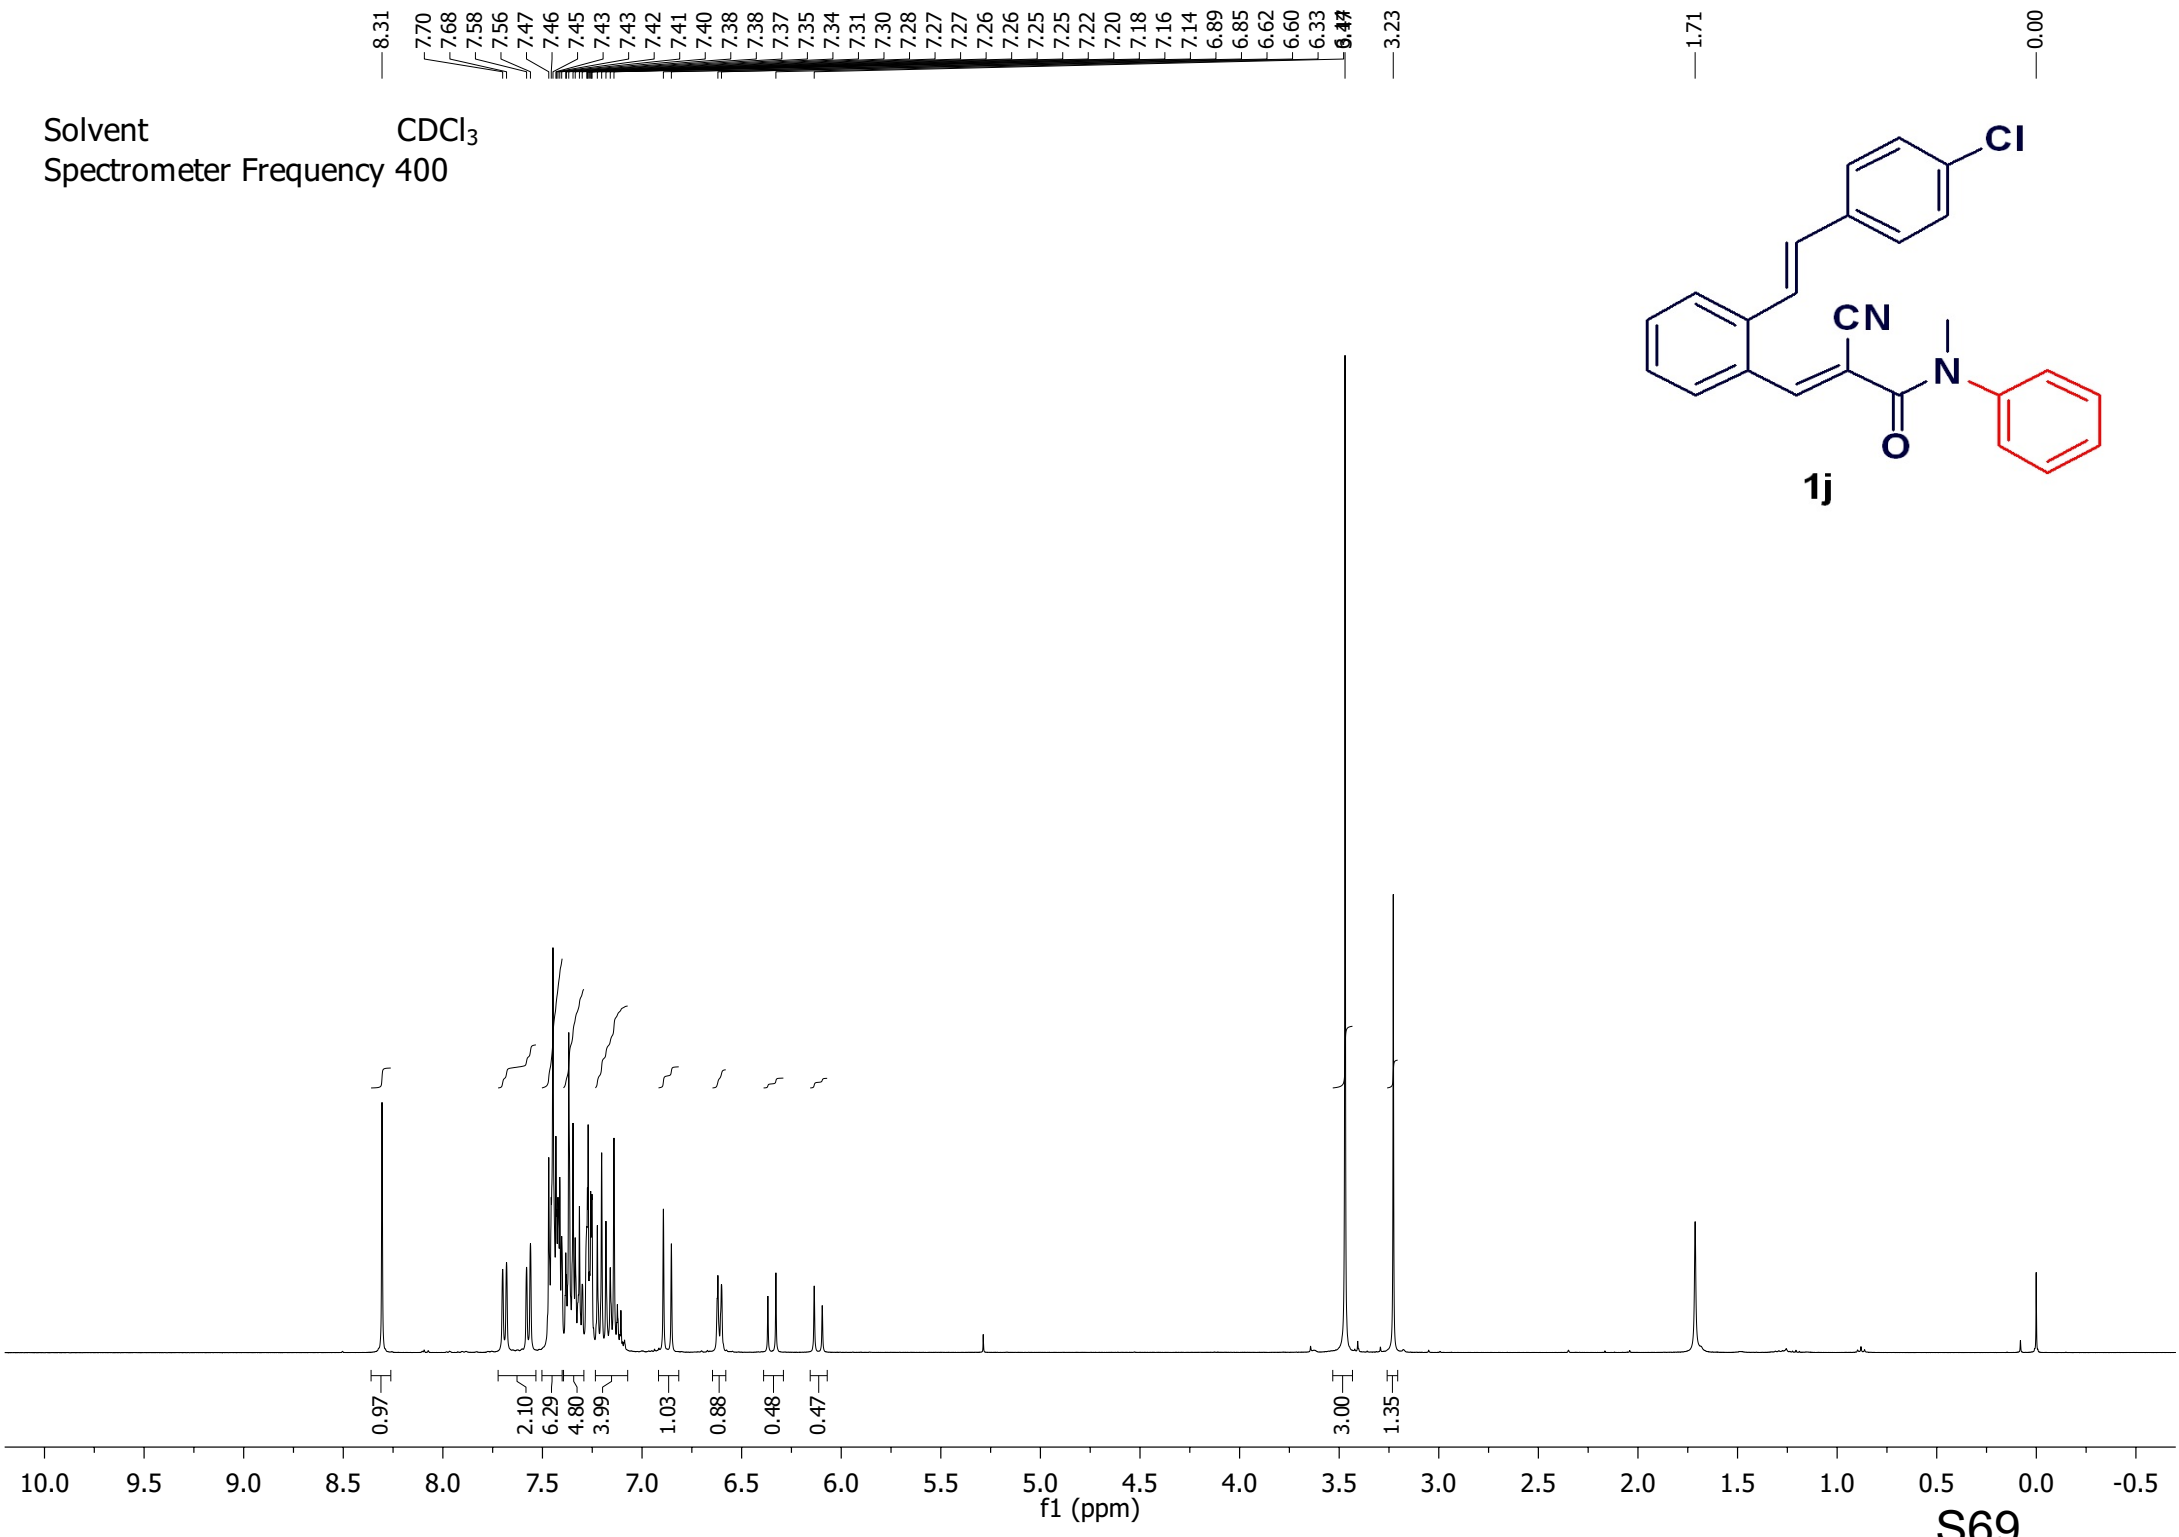

Solvent  $\text{CDCl}_3$   
Spectrometer Frequency 100

162.99  
162.17  
151.57  
131.42  
129.83  
128.90  
128.85  
128.57  
128.21  
128.04  
127.80  
127.75  
127.18  
126.99  
125.43  
116.84  
114.49  
111.29  
109.82

77.31  
76.99  
76.67

38.85  
37.10

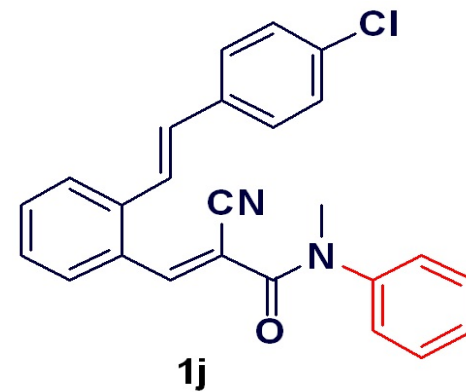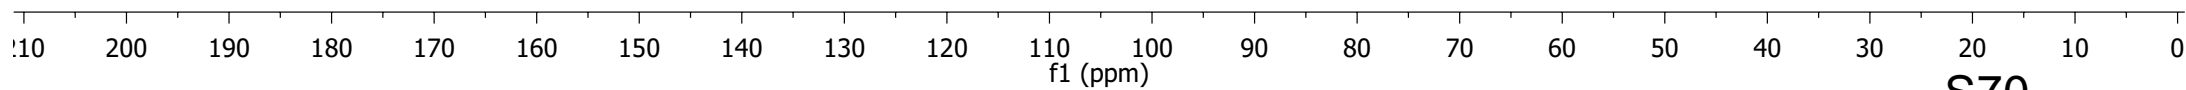

8.36  
8.29  
8.18  
8.18  
8.17  
8.16  
8.16  
8.15  
8.15  
8.13  
7.59  
7.45  
7.43  
7.30  
7.29  
7.29  
7.28  
7.27  
6.88  
6.64  
6.48  
6.44  
6.22  
6.18

3.48  
3.24

0.00

Solvent  $\text{CDCl}_3$   
Spectrometer Frequency 400

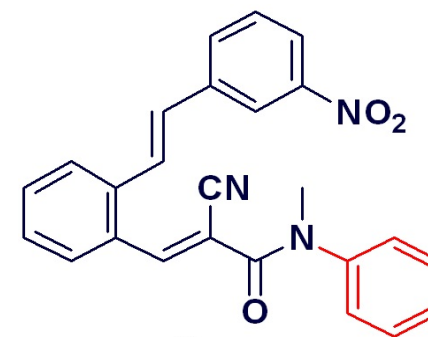

11

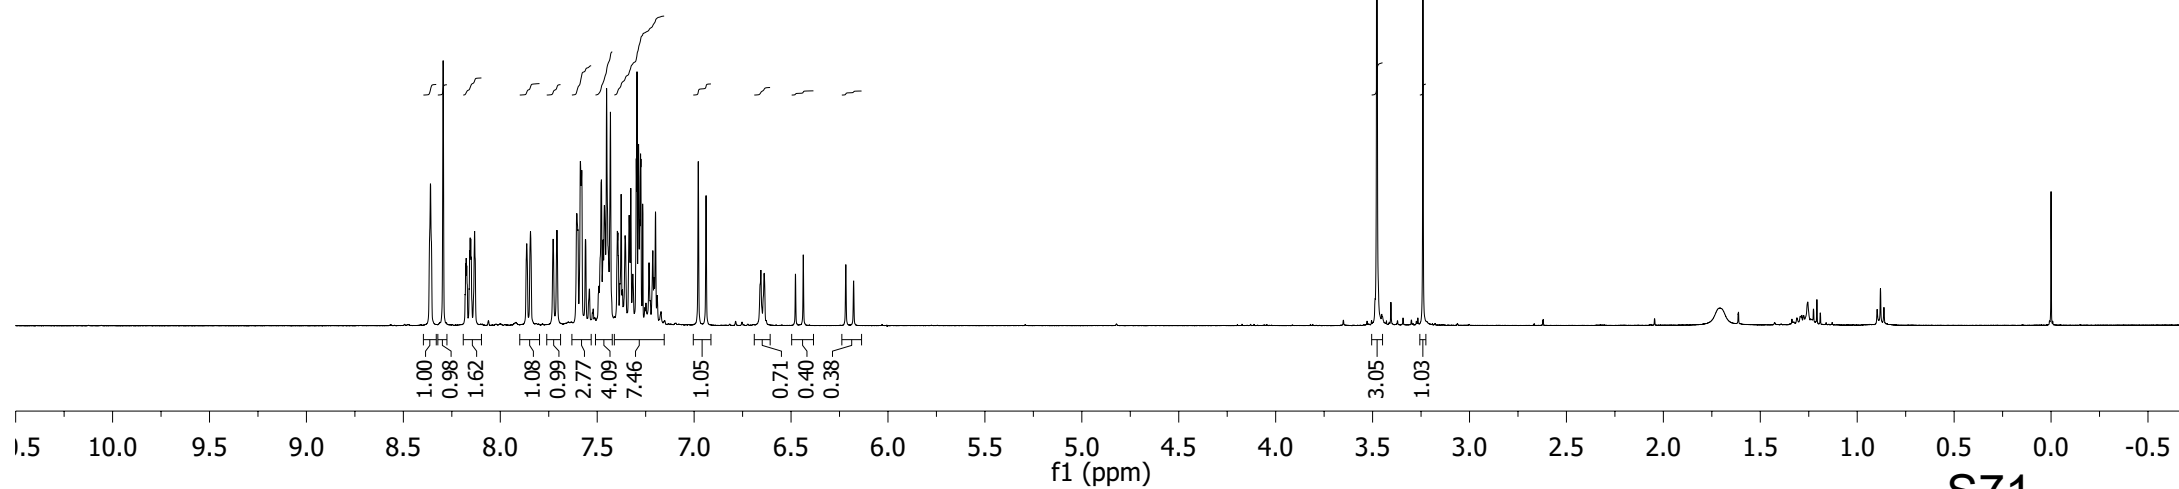

S71

Solvent  $\text{CDCl}_3$   
Spectrometer Frequency 100

162.86 162.05  
151.29 142.57 138.42 137.36 132.55 132.23 131.87 131.50 131.00 130.85 130.62 129.87 129.72 129.64 129.20 129.05 128.69 128.41 128.30 128.13 128.07 127.88 127.85 127.55 127.33 127.03 126.03 122.73 122.67 121.40 77.51 77.16 76.99 76.67

38.88 37.14

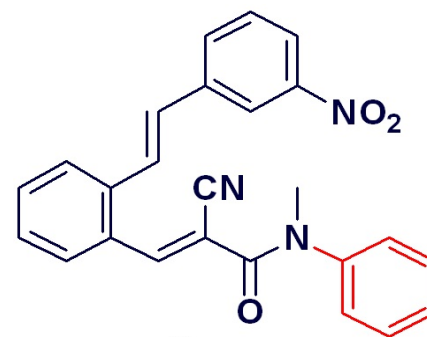

11

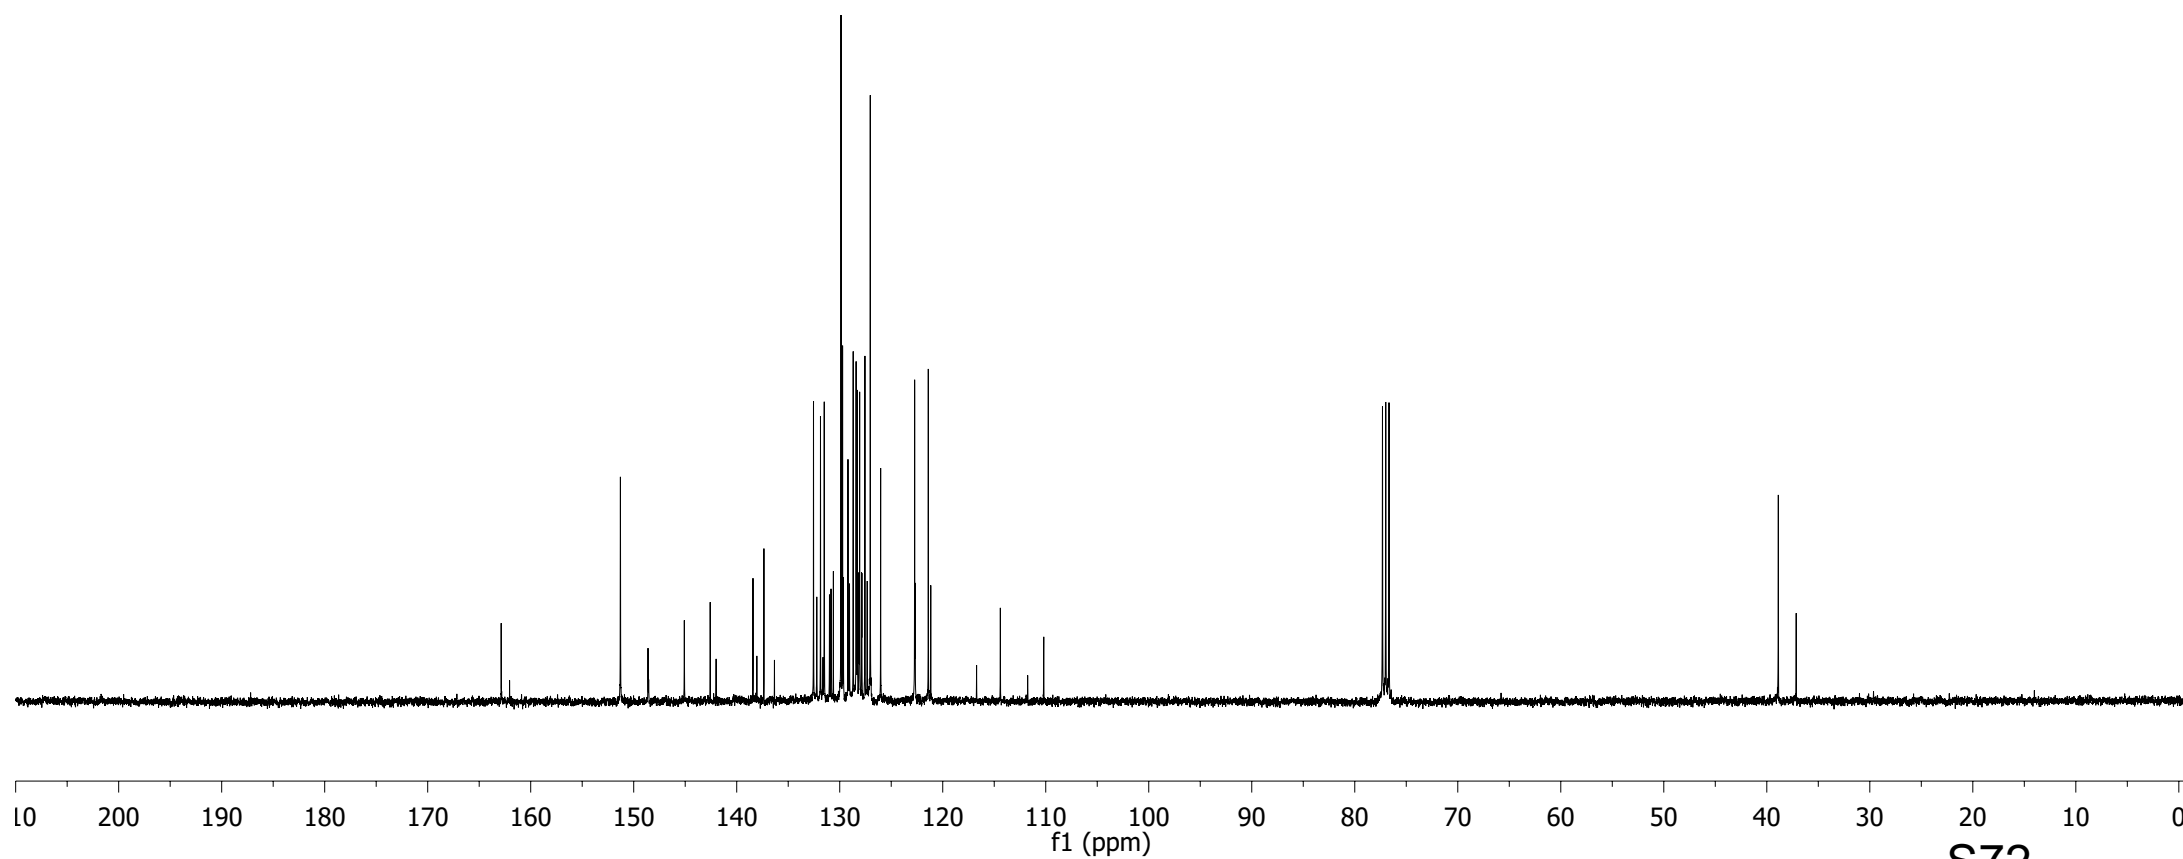



Solvent  $\text{CDCl}_3$   
Spectrometer Frequency 100

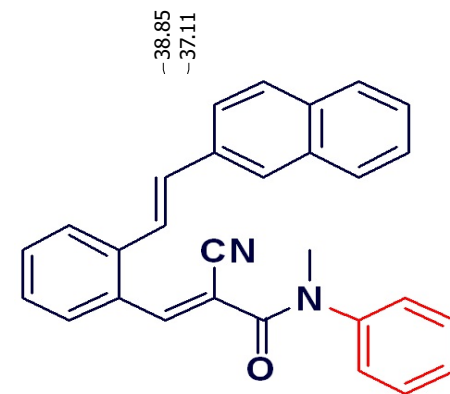

**1m**

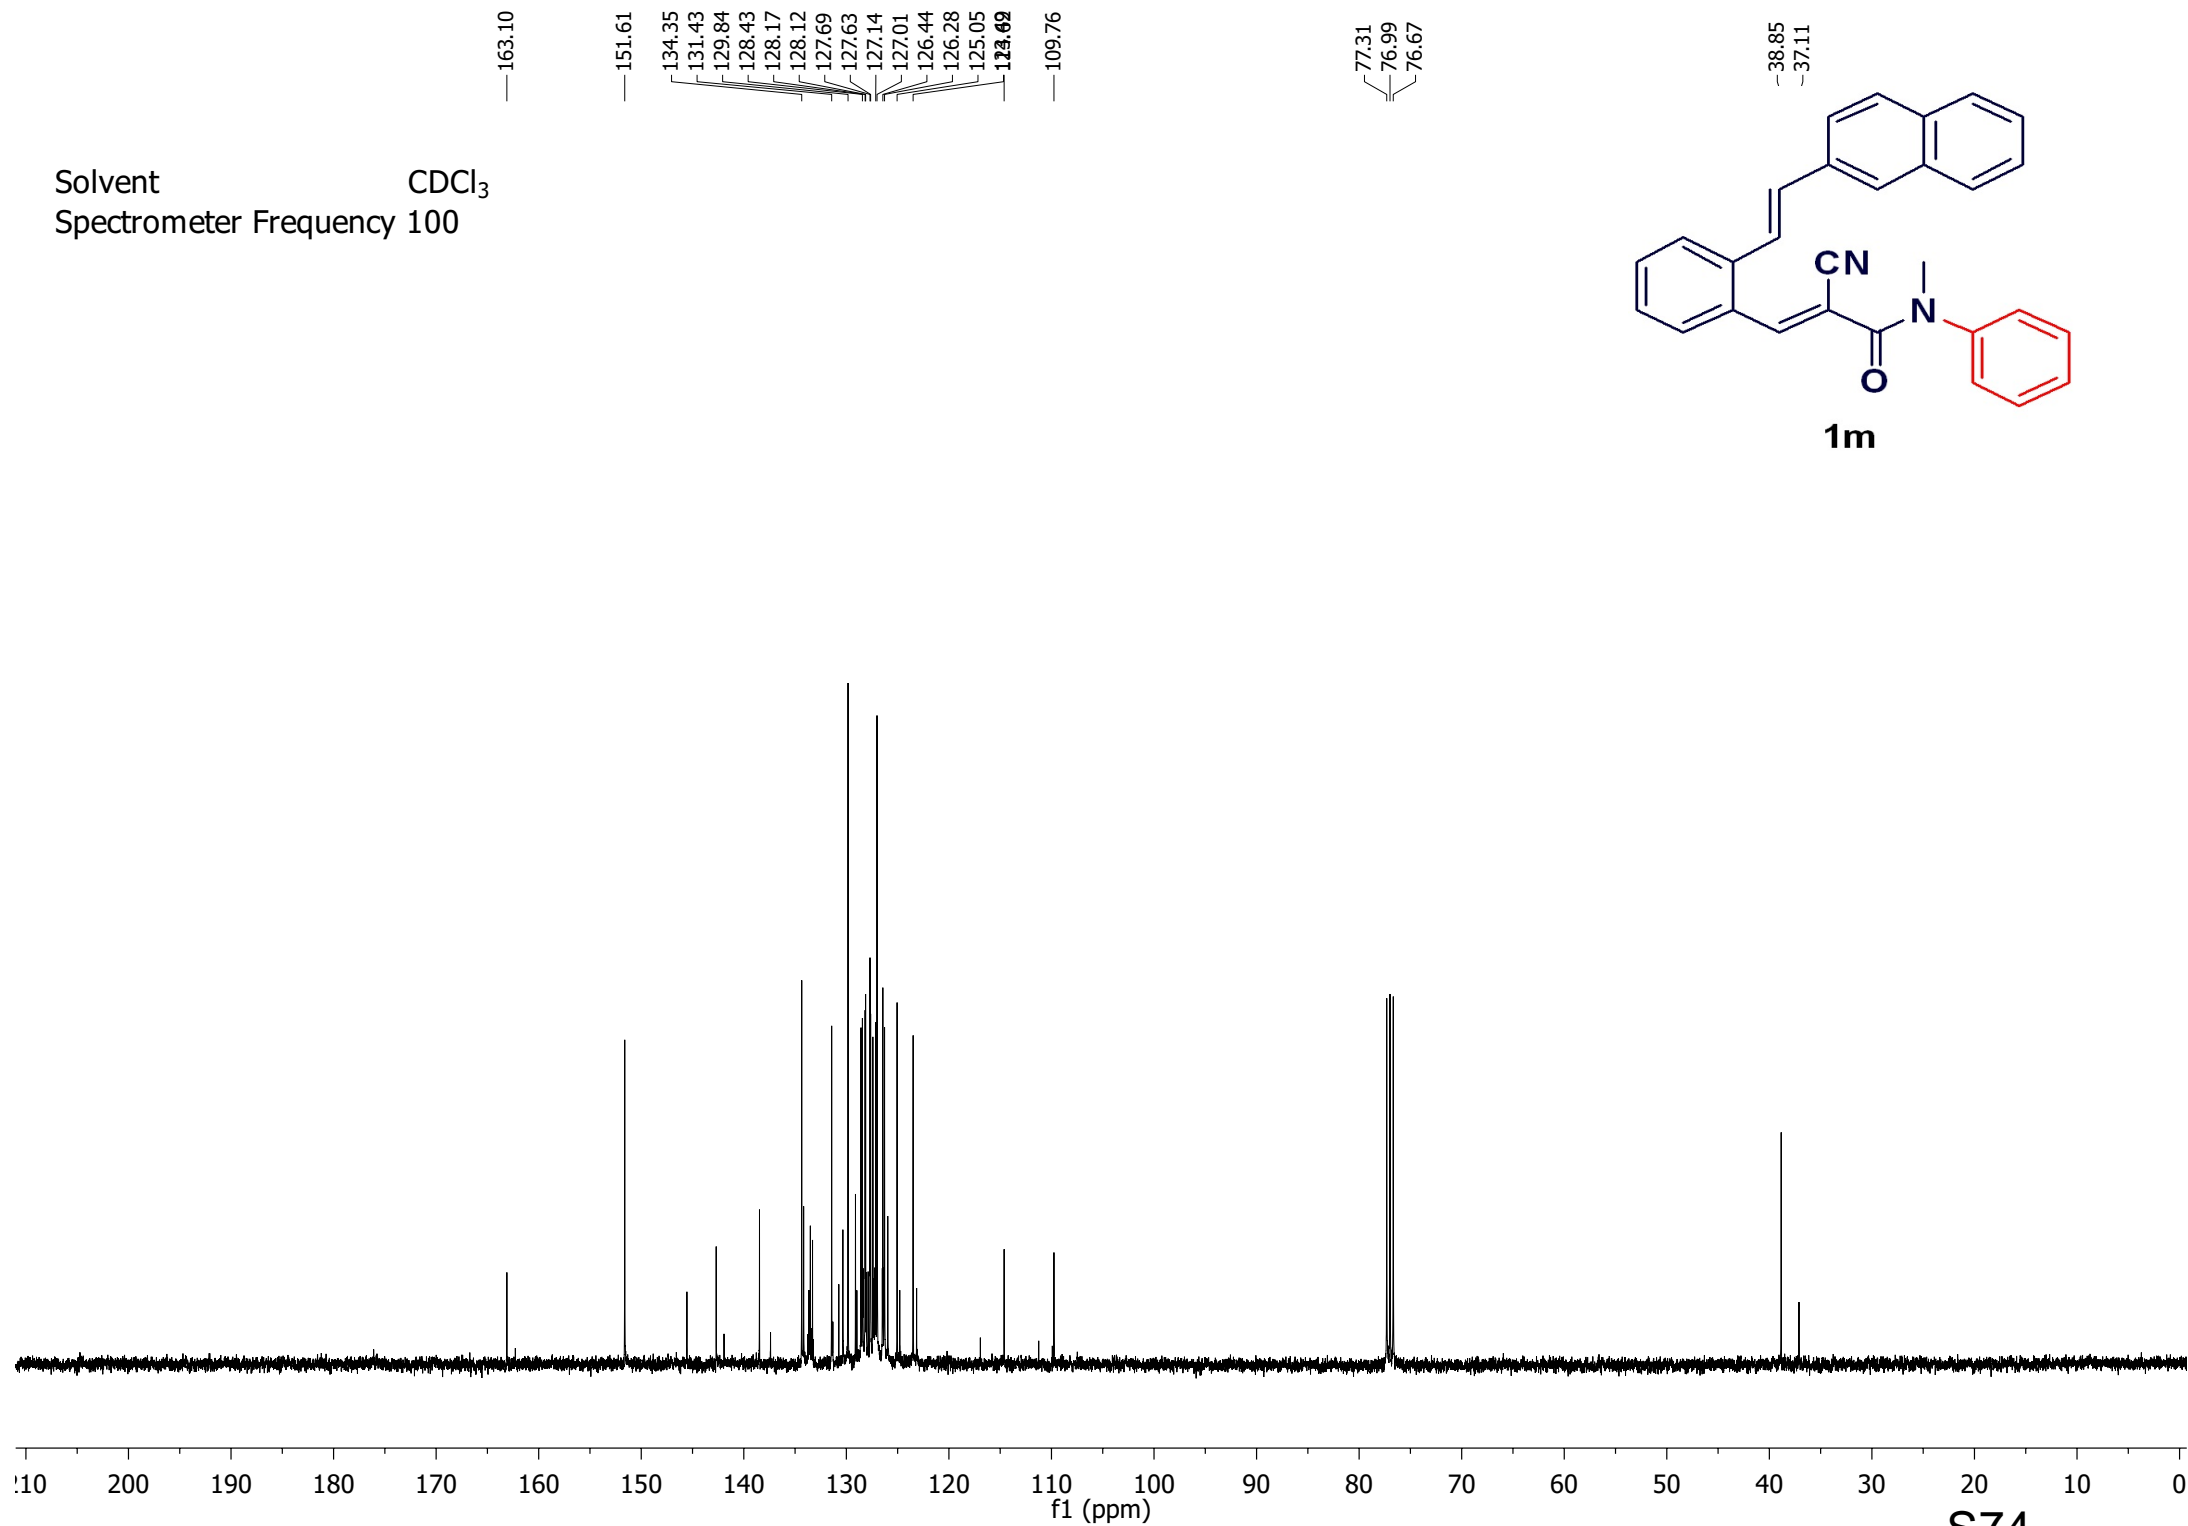

Solvent  $\text{CDCl}_3$   
Spectrometer Frequency 400

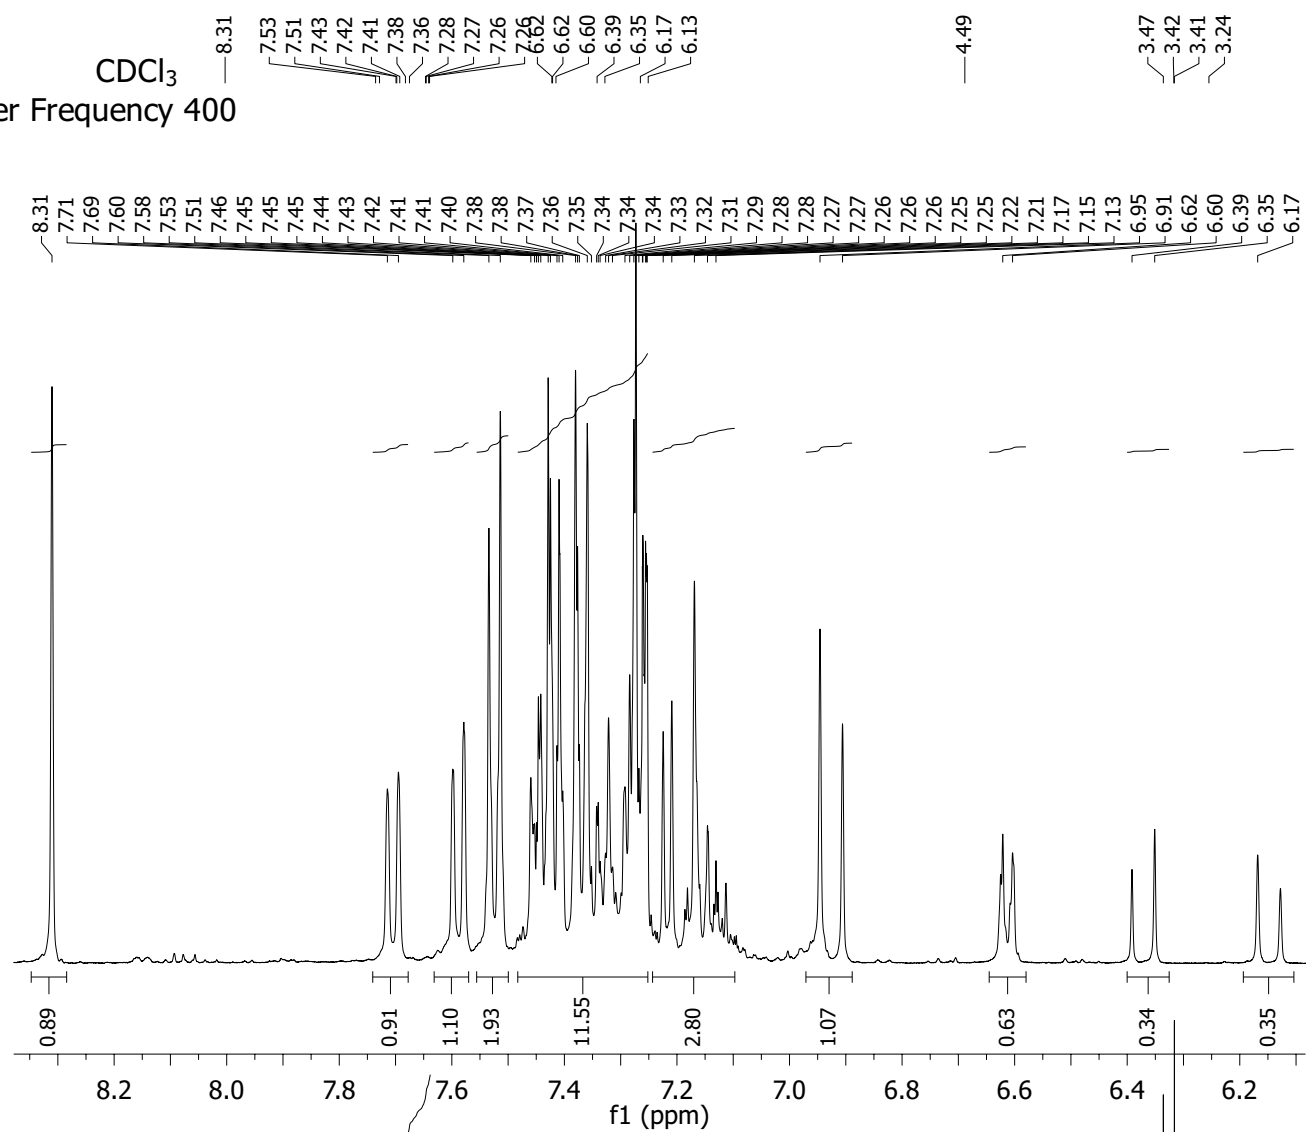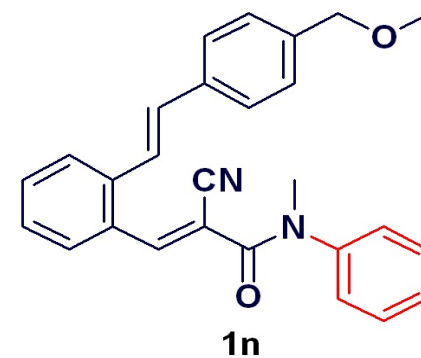

Solvent  $\text{CDCl}_3$   
Spectrometer Frequency 100

163.10  
151.67  
134.01  
131.42  
129.84  
128.54  
128.19  
128.07  
128.00  
127.60  
127.16  
127.01  
126.93  
126.66  
124.79  
116.91  
114.59  
109.67

77.31  
76.99  
76.68  
74.27

58.08

38.86  
37.12

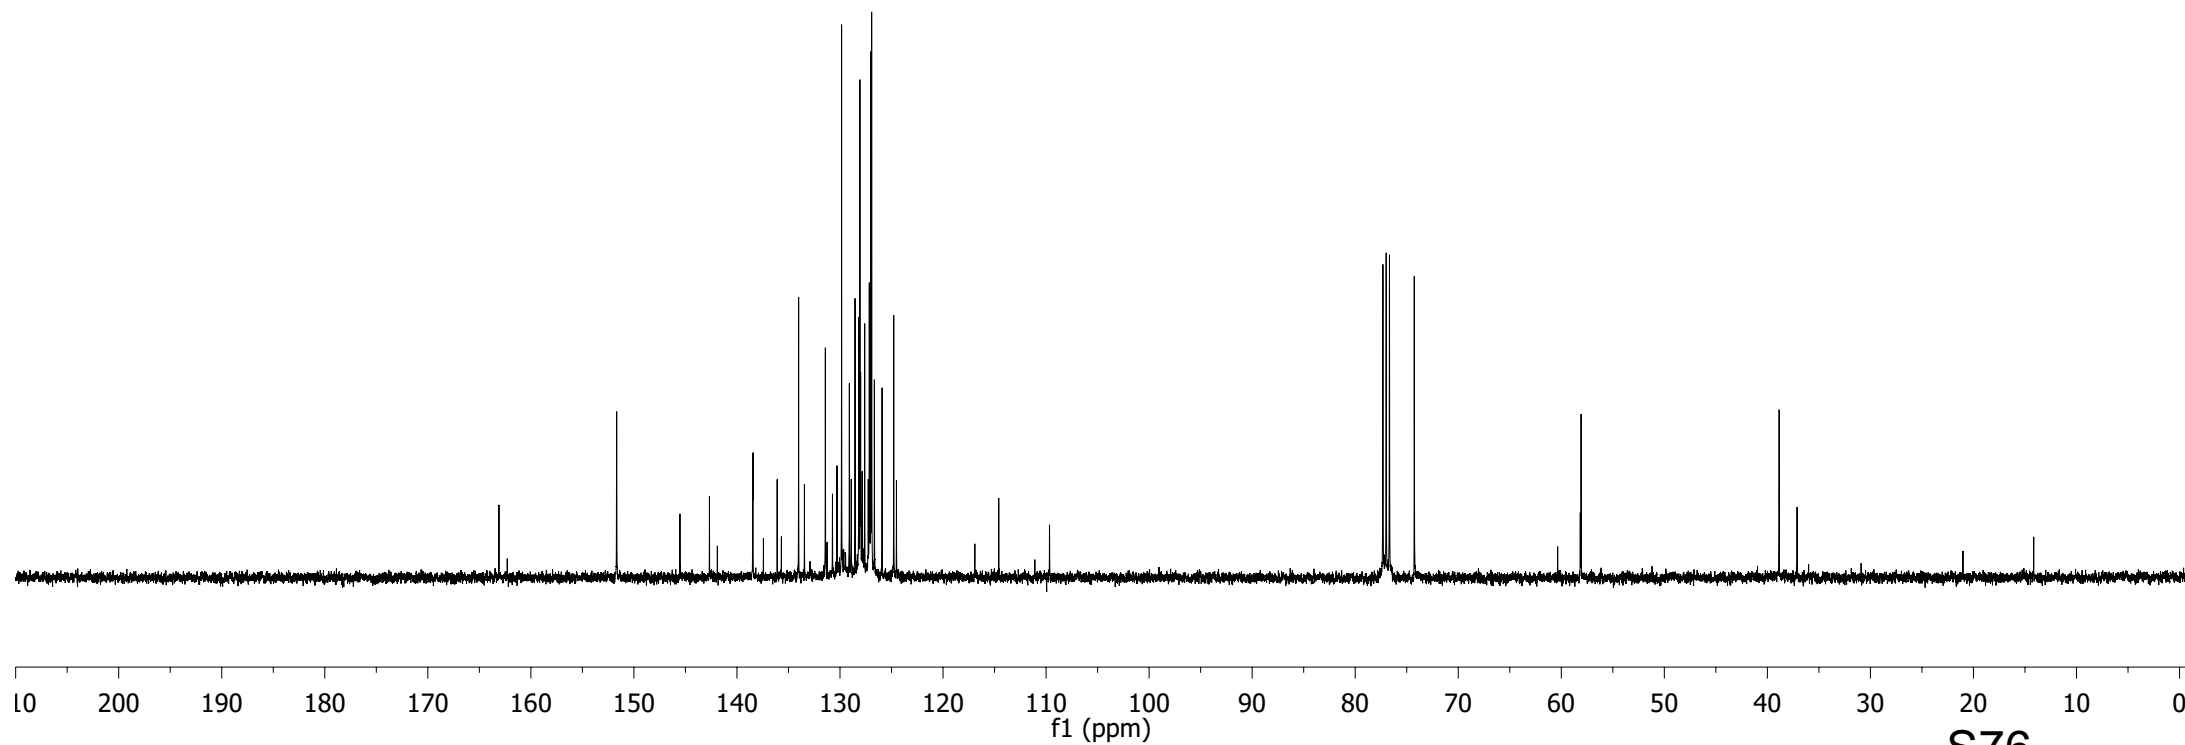

Solvent CDCl<sub>3</sub>  
Spectrometer Frequency 400

8.30  
7.53  
7.47  
7.42  
7.41  
7.30  
7.30  
7.27  
7.26  
7.00  
6.98  
6.98  
6.61  
6.60  
6.40  
6.36  
6.17  
6.13

5.09  
5.07

3.46  
3.23

0.00

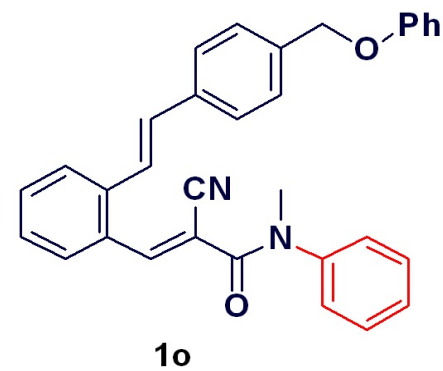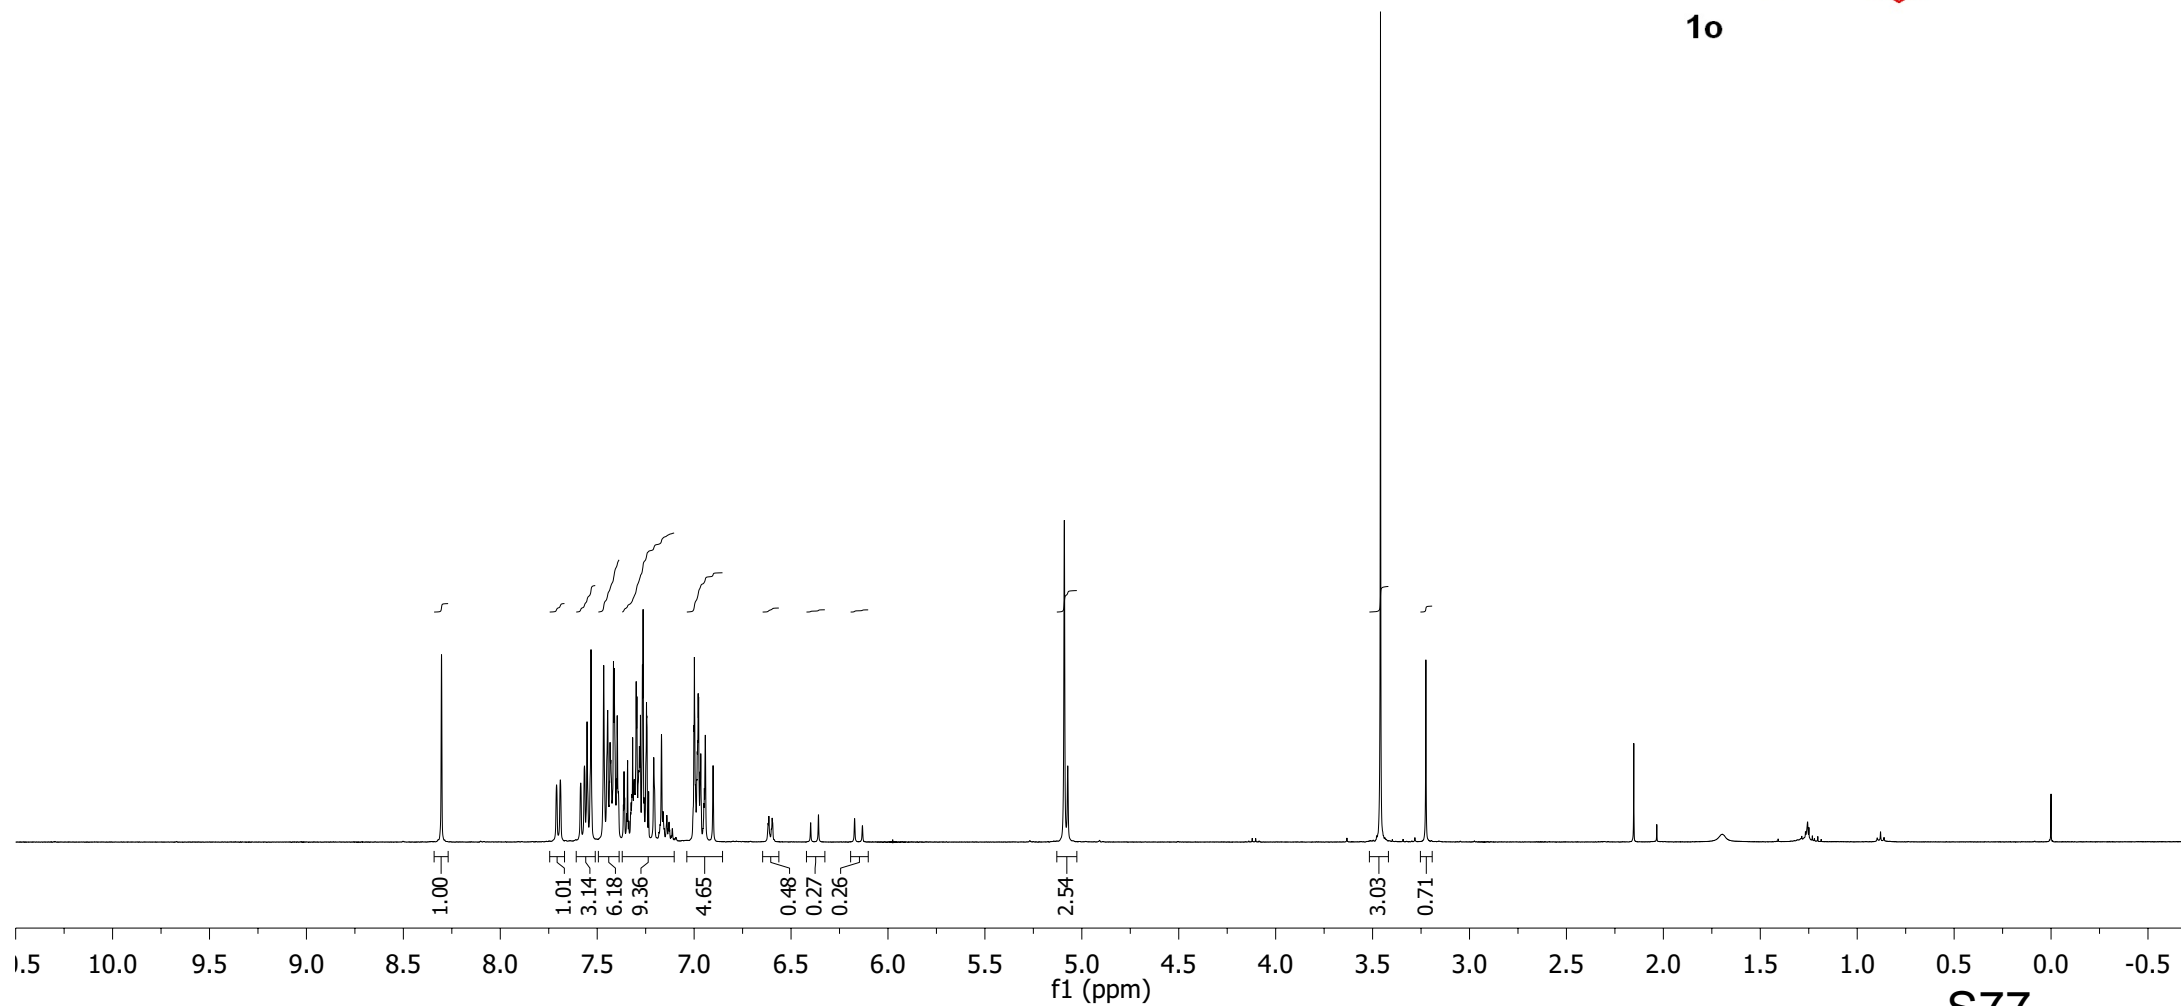

Solvent  $\text{CDCl}_3$   
Spectrometer Frequency 400

163.01 162.23 158.54  
151.62 142.63 138.31 137.24 136.33 133.84 131.38 130.28 129.80 129.42 129.05 128.51 128.14 127.80 127.76 127.71 127.62 127.15 127.09 127.04 126.96 126.77 125.88 125.01 120.95 120.93 114.77 114.74 114.55 114.31 76.99 76.67 69.45 69.41

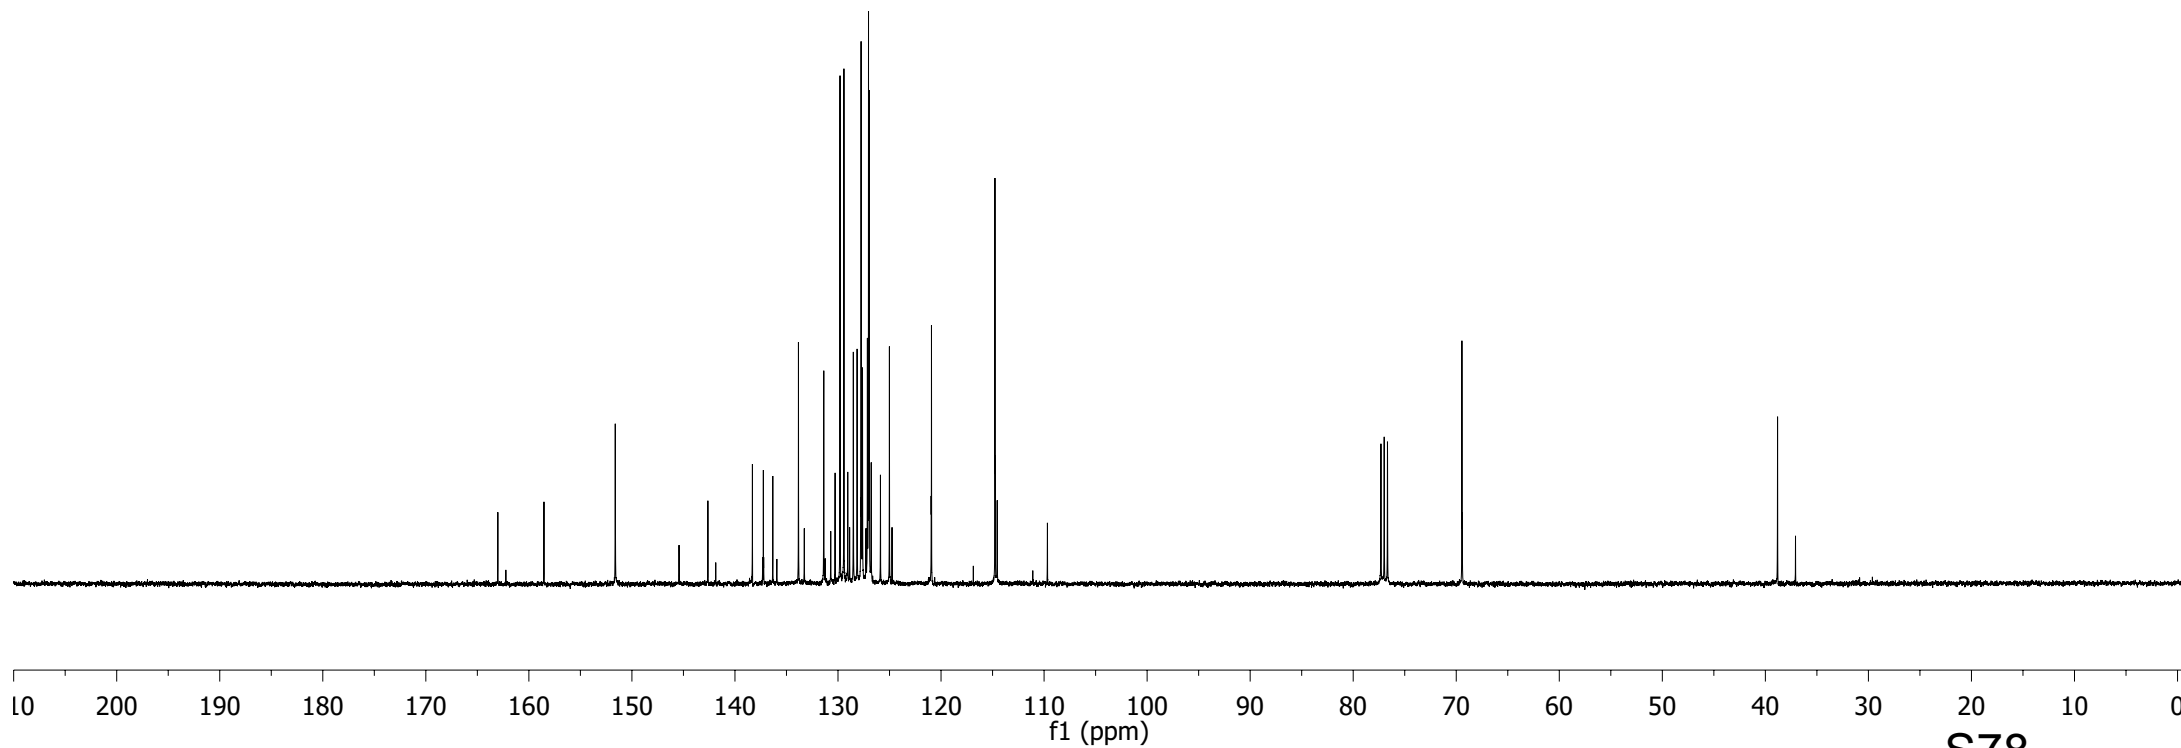

Solvent  $\text{CDCl}_3$   
Spectrometer Frequency 400

8.65 8.63 8.26 7.88 7.87 7.86 7.85 7.73 7.72 7.71 7.48 7.44 7.43 7.43 7.42 7.42 7.40 7.27 7.26 7.25 7.24 7.12 6.90 5.90 5.09 4.88 4.86 3.73 3.71 3.70 3.46 3.32 3.23 2.18 0.00

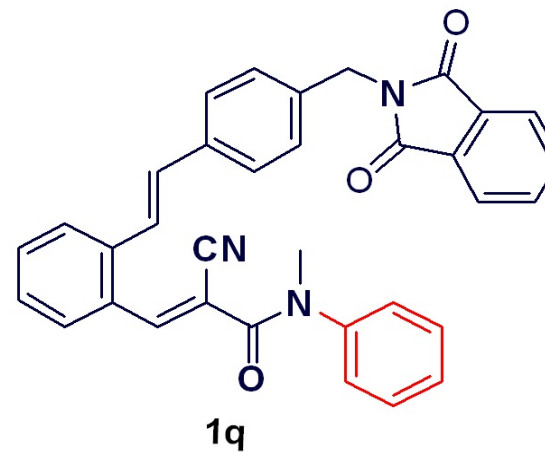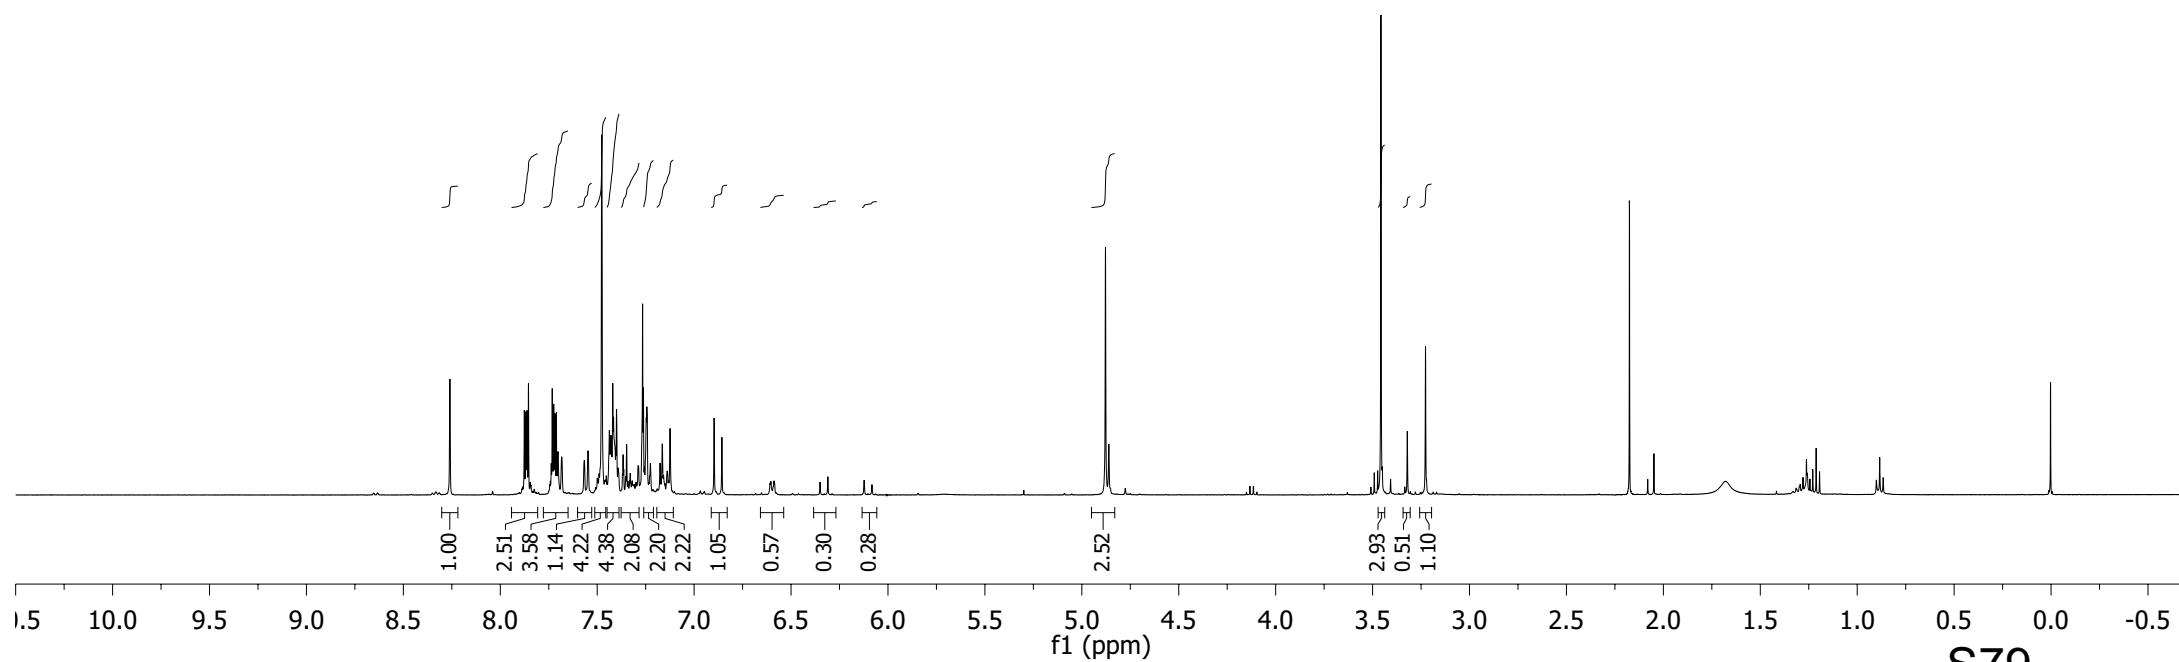

Solvent  $\text{CDCl}_3$   
Spectrometer Frequency 100

167.98  
163.03

151.64  
134.00  
133.82  
131.38  
129.84  
129.10  
129.07  
128.54  
128.18  
127.67  
127.21  
127.16  
127.00  
125.25  
124.53  
109.70

77.31  
76.99  
76.67

41.30  
38.86  
37.12

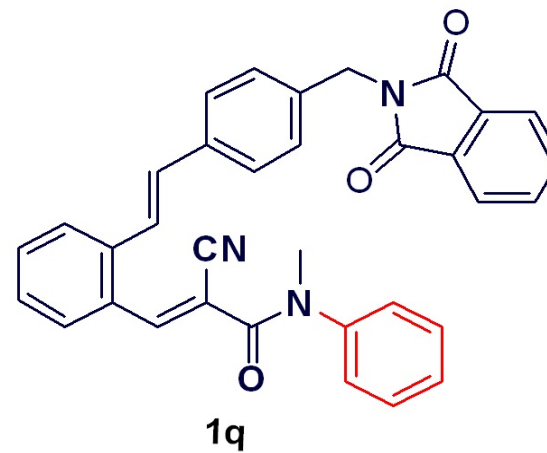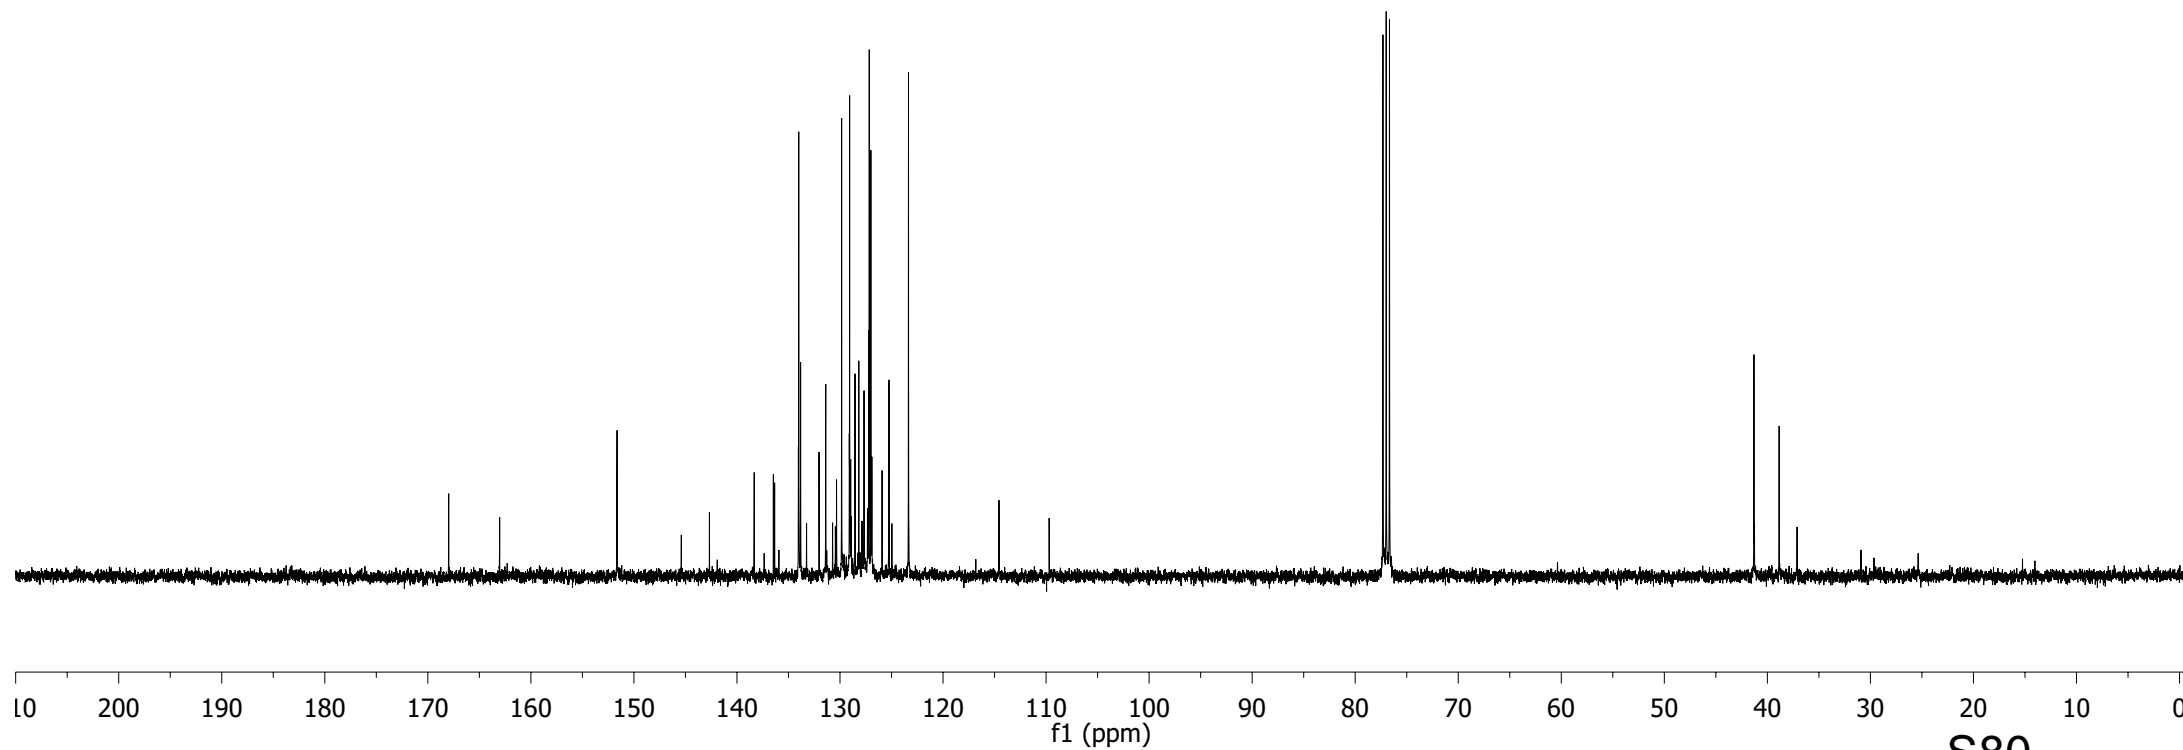

8.66  
8.65  
8.65  
8.64  
8.35  
7.80  
7.77  
7.72  
7.72  
7.71  
7.70  
7.70  
7.69  
7.68  
7.65  
7.63  
7.43  
7.42  
7.42  
7.41  
7.40  
7.40  
7.36  
7.36  
7.34  
7.33  
7.32  
7.31  
7.30  
7.30  
7.29  
7.27  
7.23  
7.22  
7.21  
7.21  
7.21  
7.19  
7.00  
6.99  
3.24  
-0.00

Solvent  $\text{CDCl}_3$   
Spectrometer Frequency 400

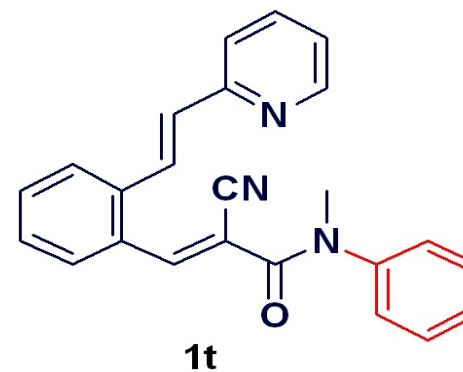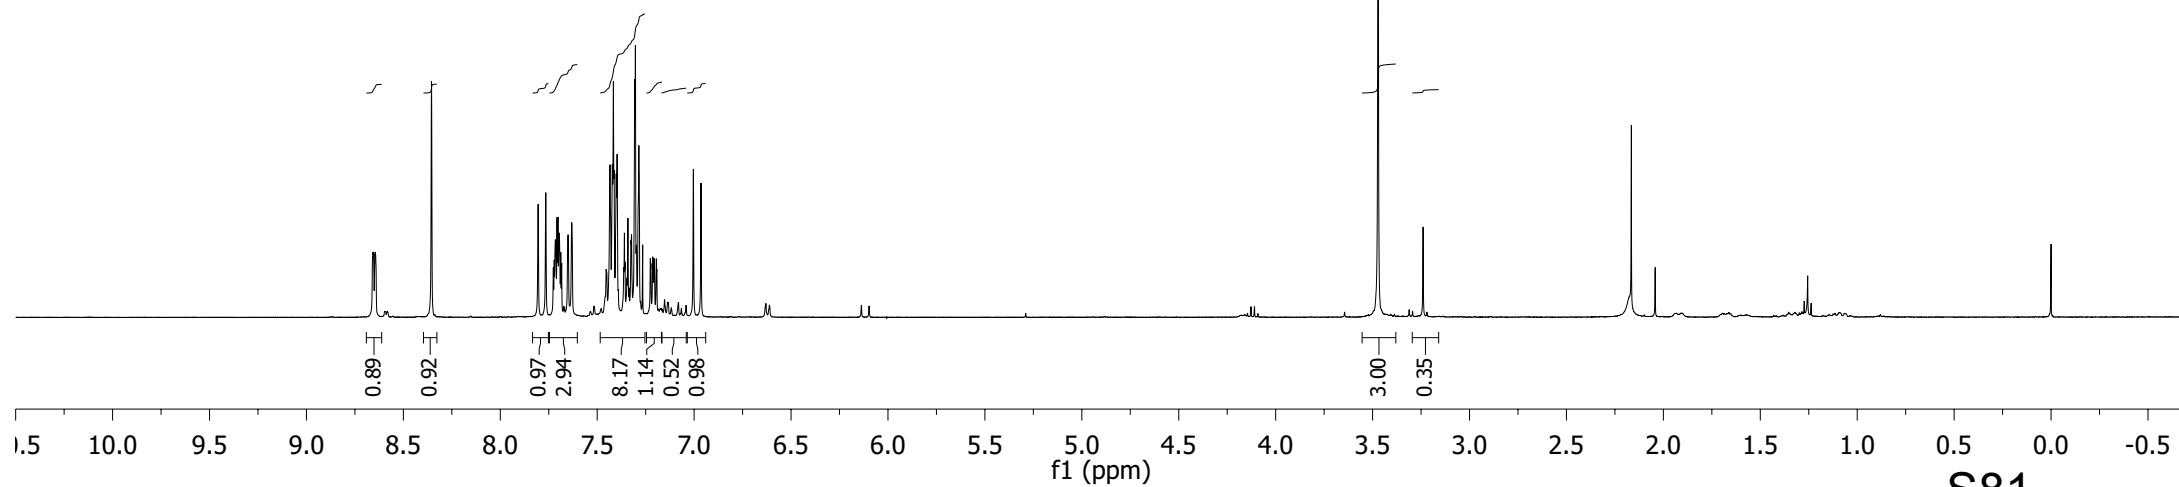

Solvent  $\text{CDCl}_3$   
Spectrometer Frequency 100

163.01  
154.73  
151.66  
149.71  
142.59  
137.67  
136.64  
133.24  
131.32  
130.83  
129.83  
128.94  
128.54  
128.15  
127.52  
127.08  
125.82  
122.74  
124.46  
110.06

77.31  
76.99  
76.67

38.79

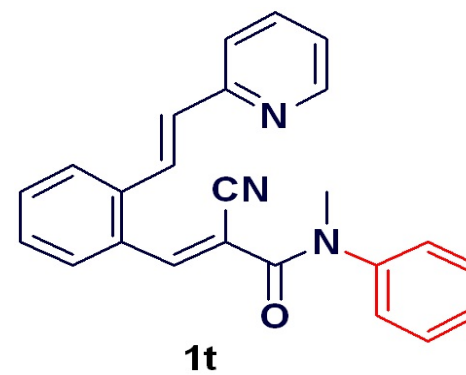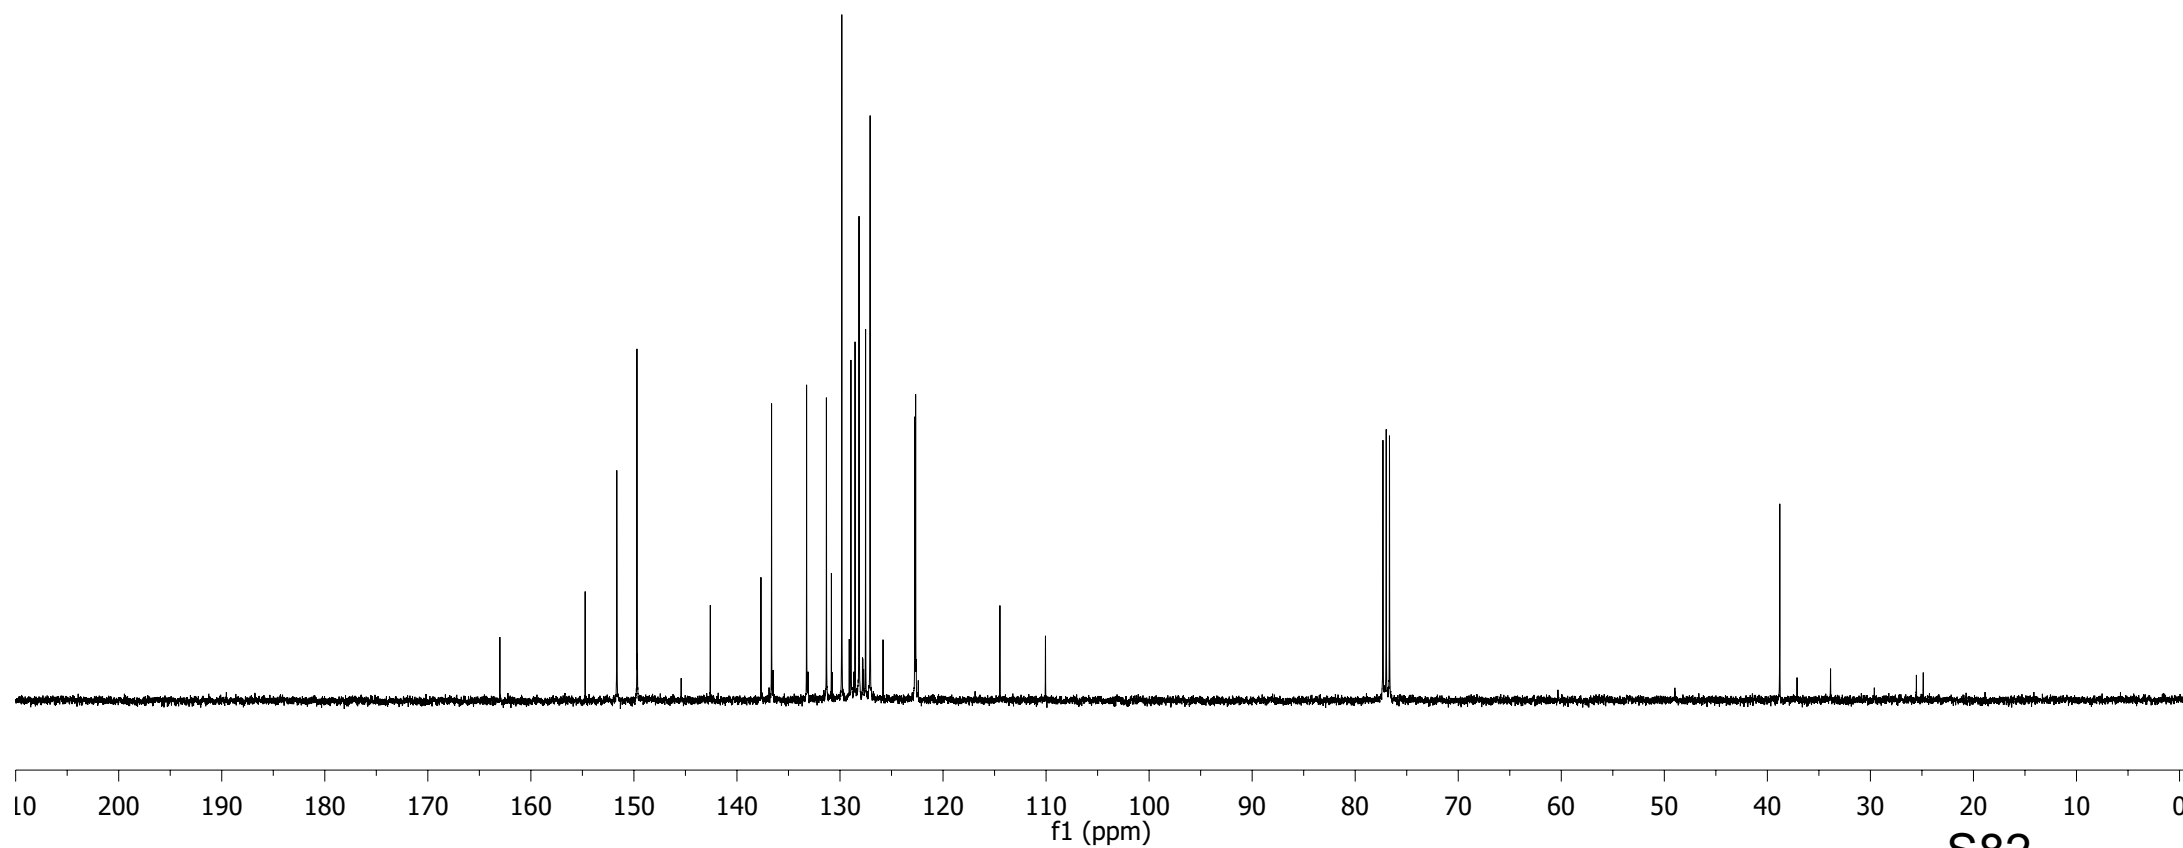

Solvent  $\text{CDCl}_3$   
Spectrometer Frequency 400

8.28  
7.52  
7.41  
7.41  
7.40  
7.39  
7.39  
7.37  
7.25  
7.24  
7.22  
7.16  
6.61  
6.60  
6.59  
6.58  
6.43  
6.39  
6.17  
6.13

3.95  
3.93  
3.91  
3.90  
3.72  
3.71  
3.69  
3.67

2.03

1.26  
1.26  
1.25  
1.23  
1.21  
1.19  
1.10  
1.09  
1.07

0.00

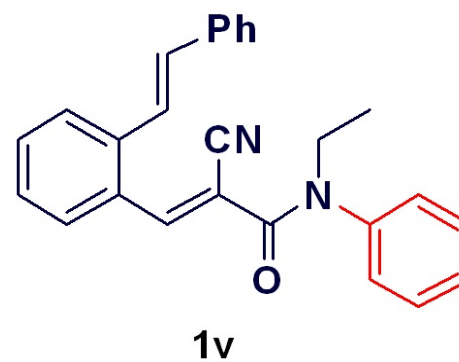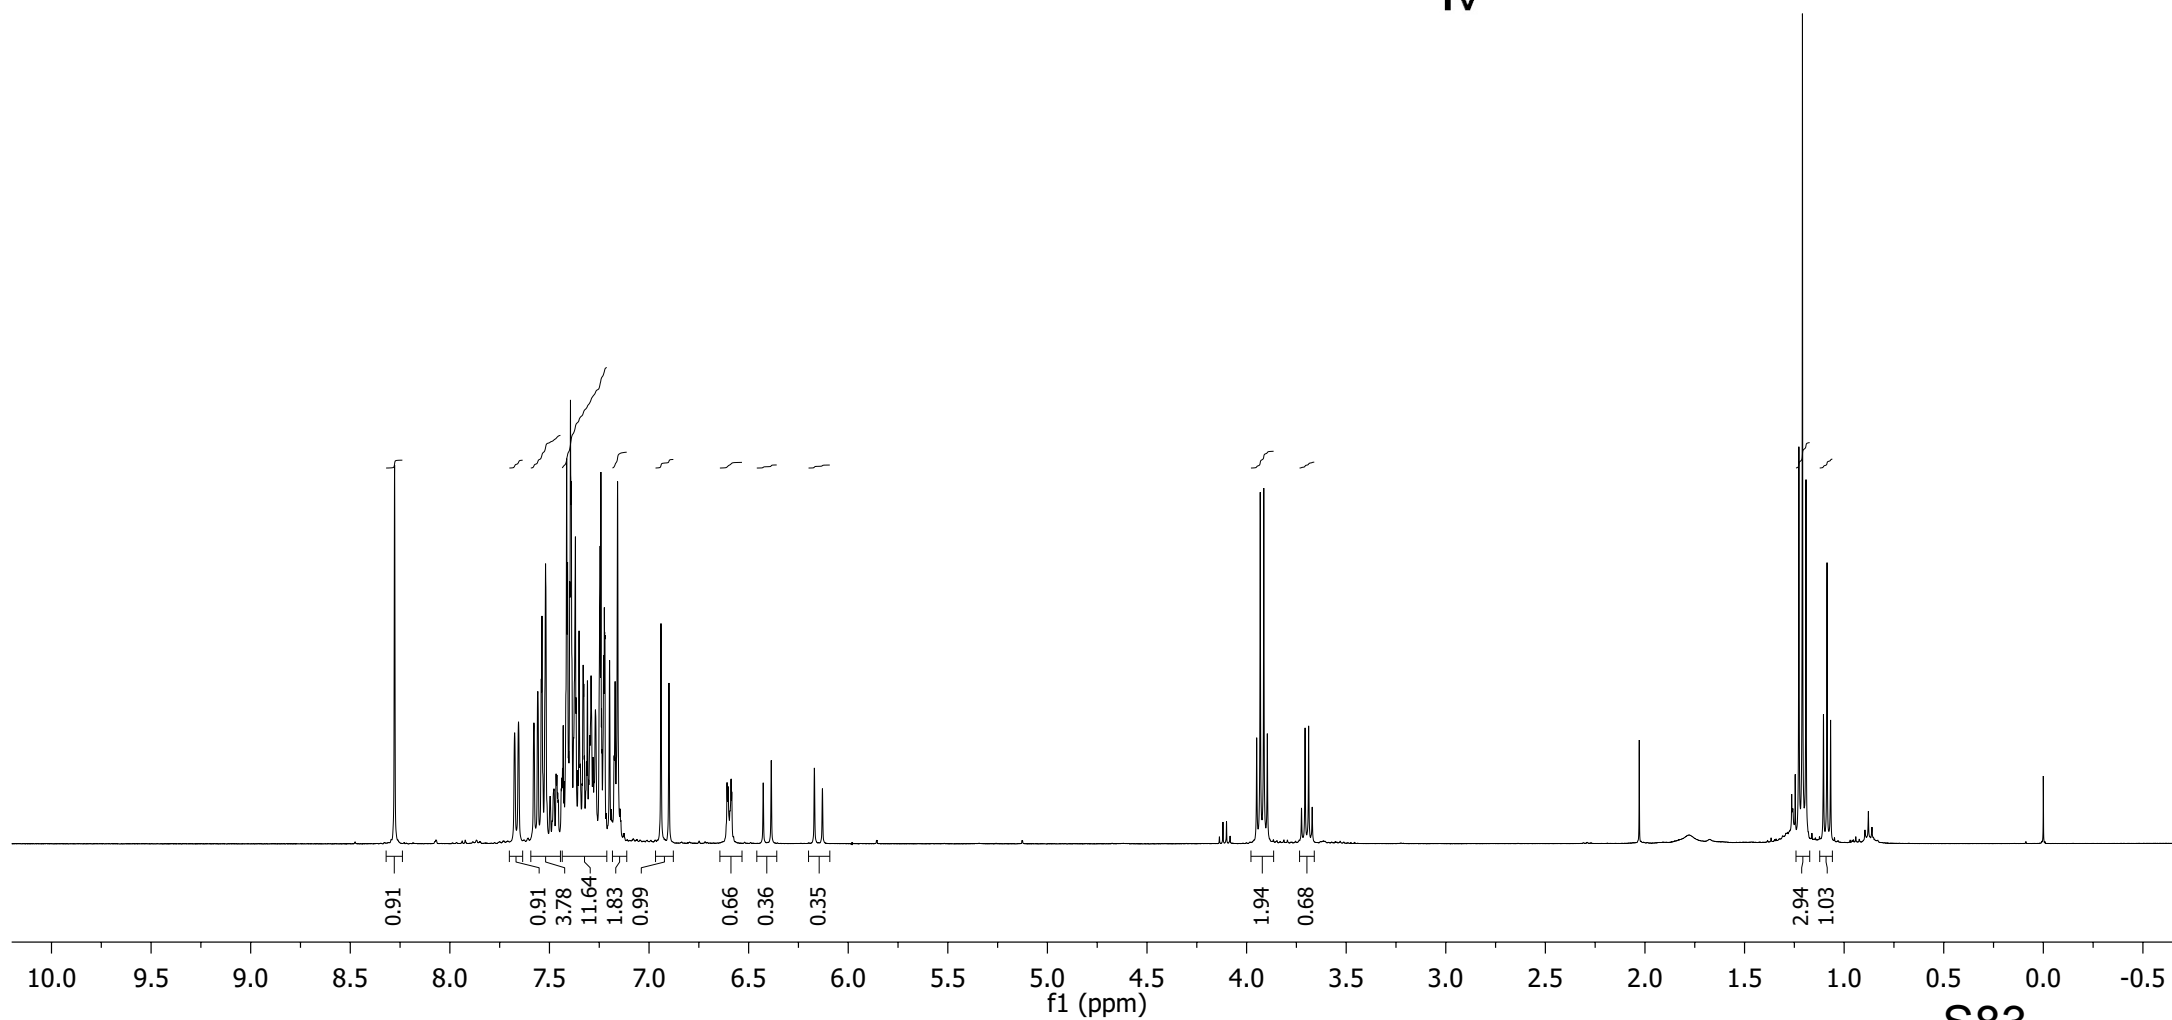

S83

162.49  
161.67  
151.45  
134.20  
131.26  
129.68  
128.67  
128.47  
128.27  
128.21  
127.96  
127.51  
127.09  
126.83  
124.86  
116.96  
114.63  
111.43  
110.06

77.31  
76.99  
76.67

46.04  
44.50

12.58  
12.34

Solvent  $\text{CDCl}_3$   
Spectrometer Frequency 100

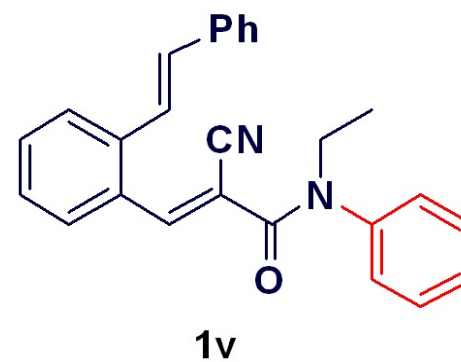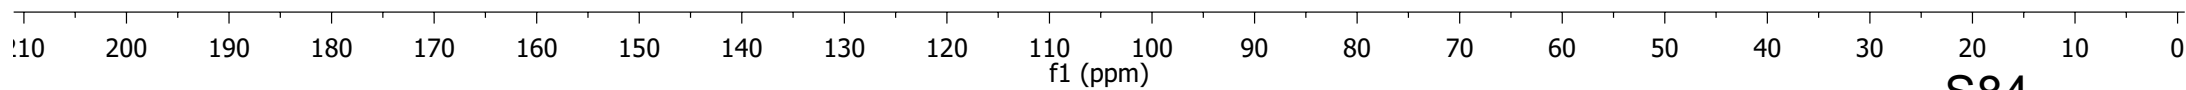

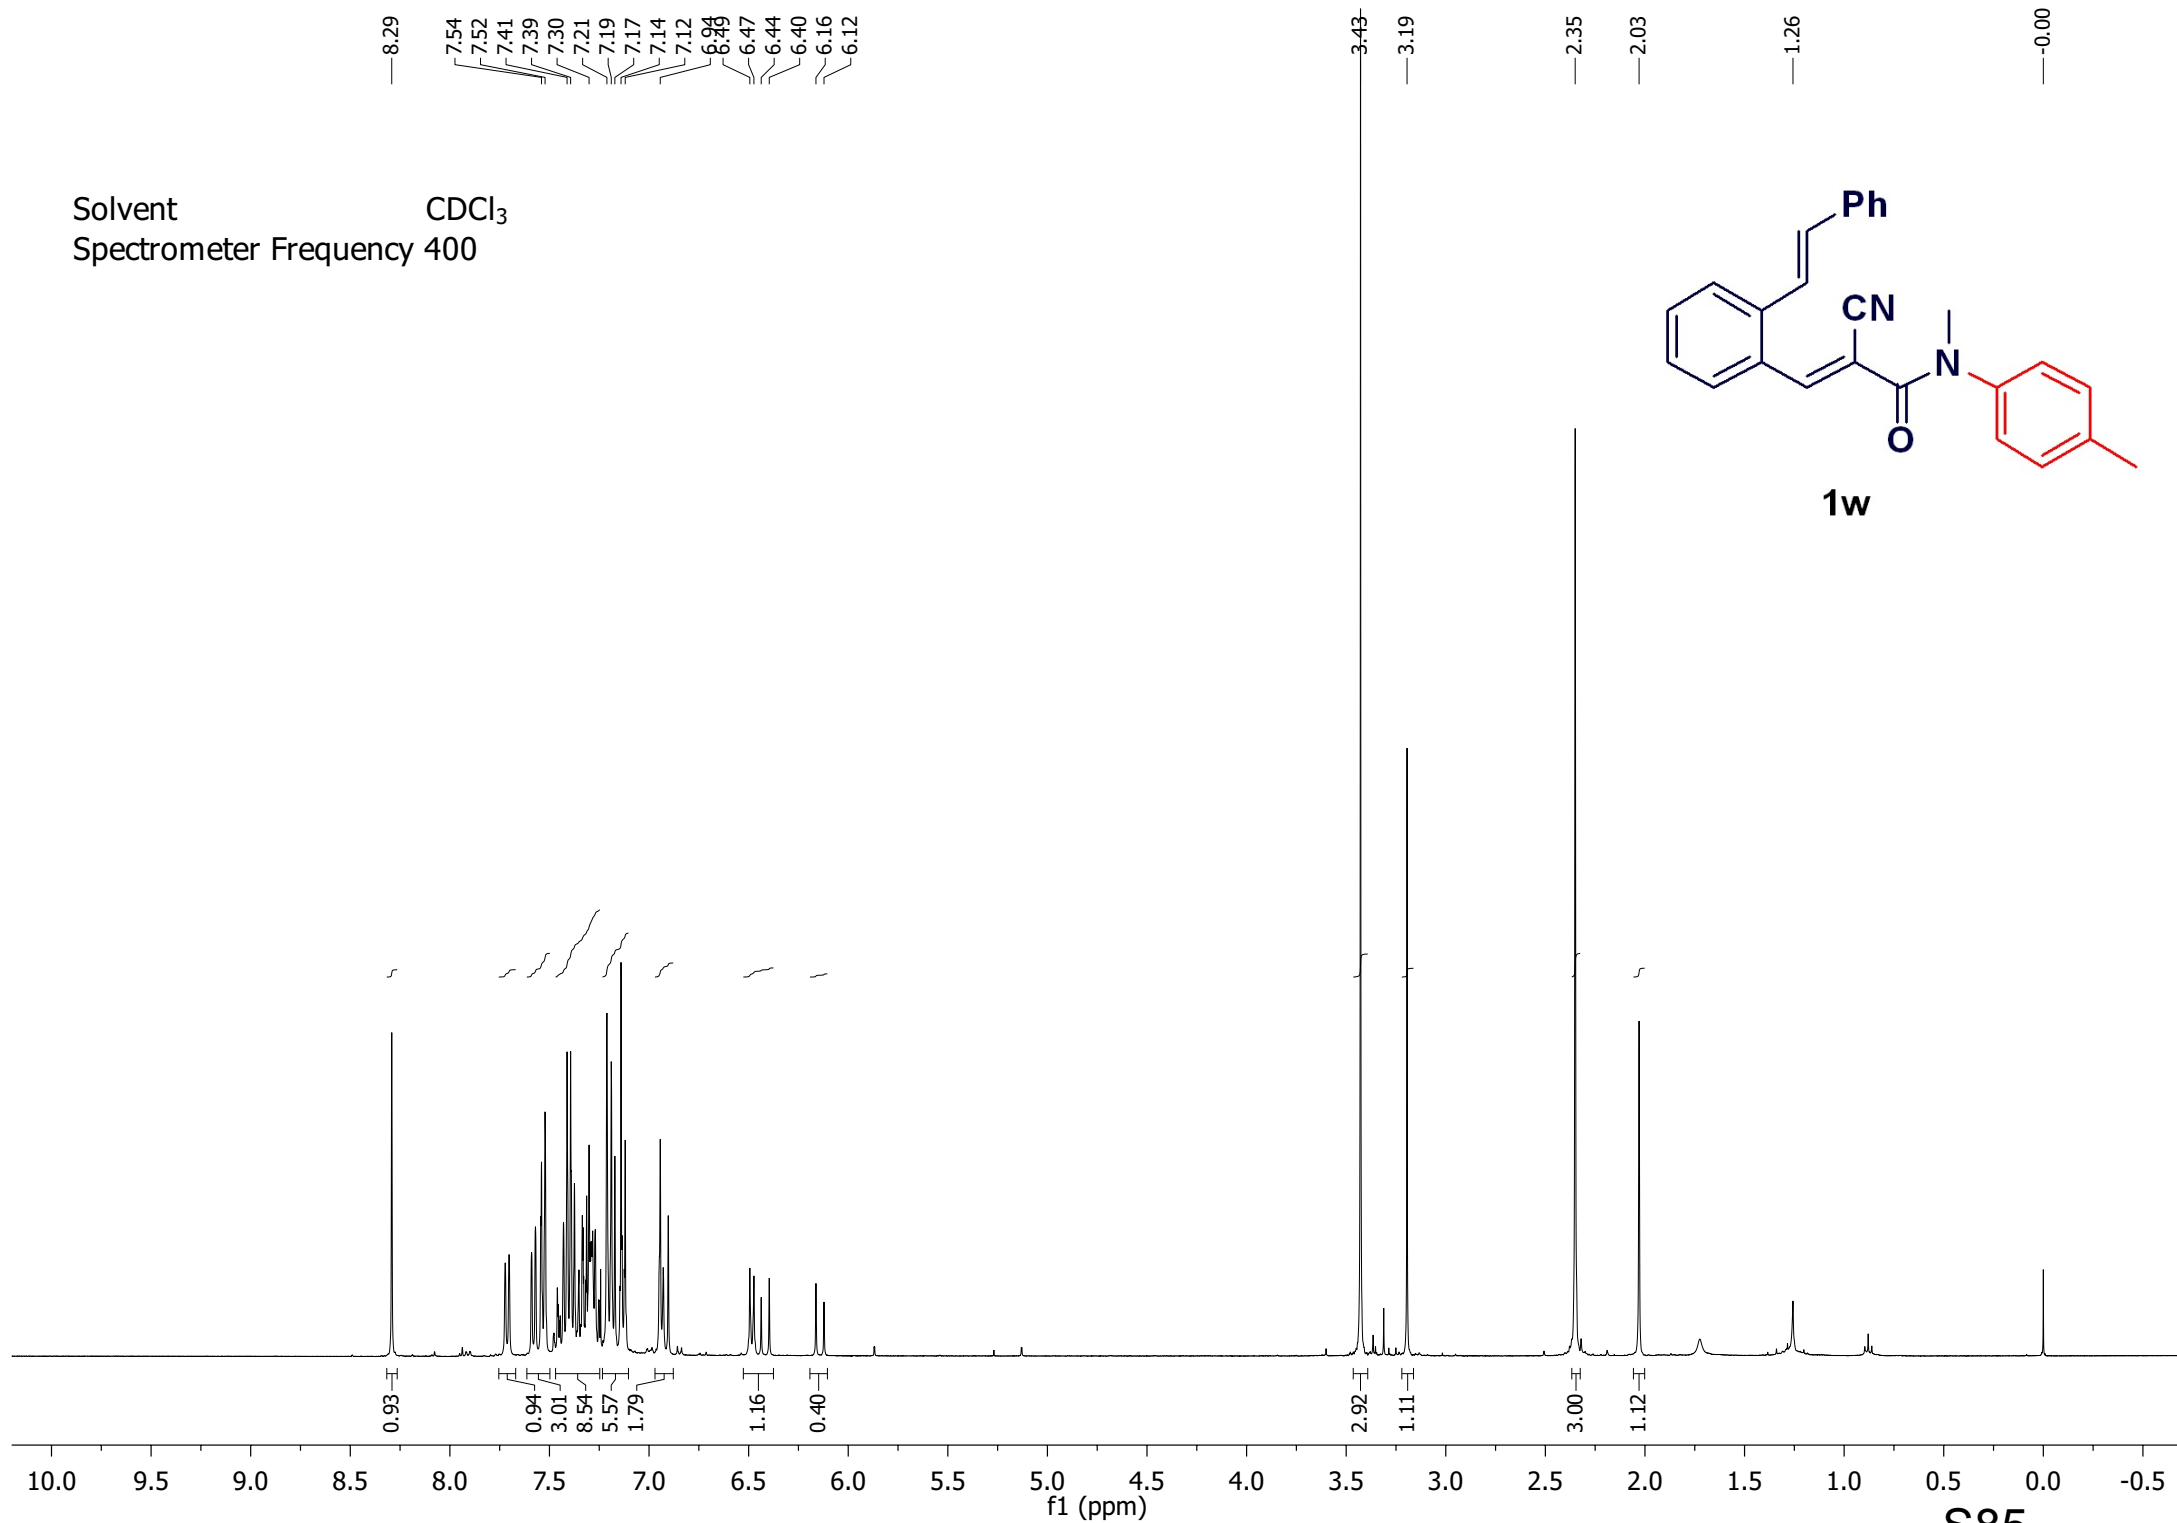

Solvent  $\text{CDCl}_3$   
Spectrometer Frequency 100

163.06  
162.26  
151.35  
145.38  
131.28  
130.38  
128.71  
128.50  
128.30  
127.55  
127.11  
126.82  
126.74  
124.85  
116.91  
114.61  
111.26  
109.88

77.31  
76.99  
76.67

38.85  
37.08

29.60

21.07  
20.70

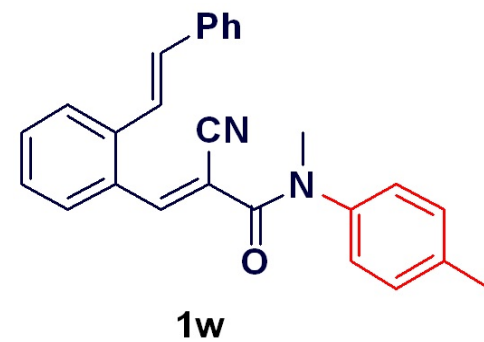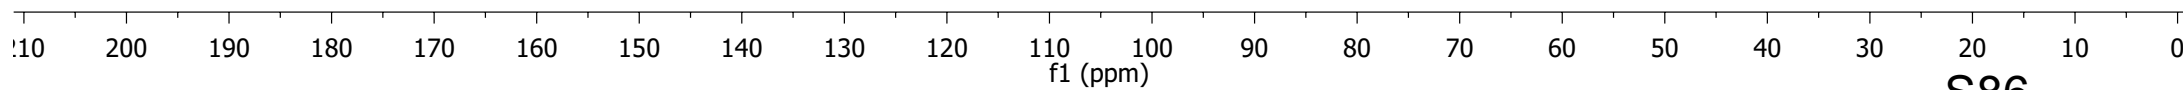

Solvent  $\text{CDCl}_3$   
Spectrometer Frequency 400

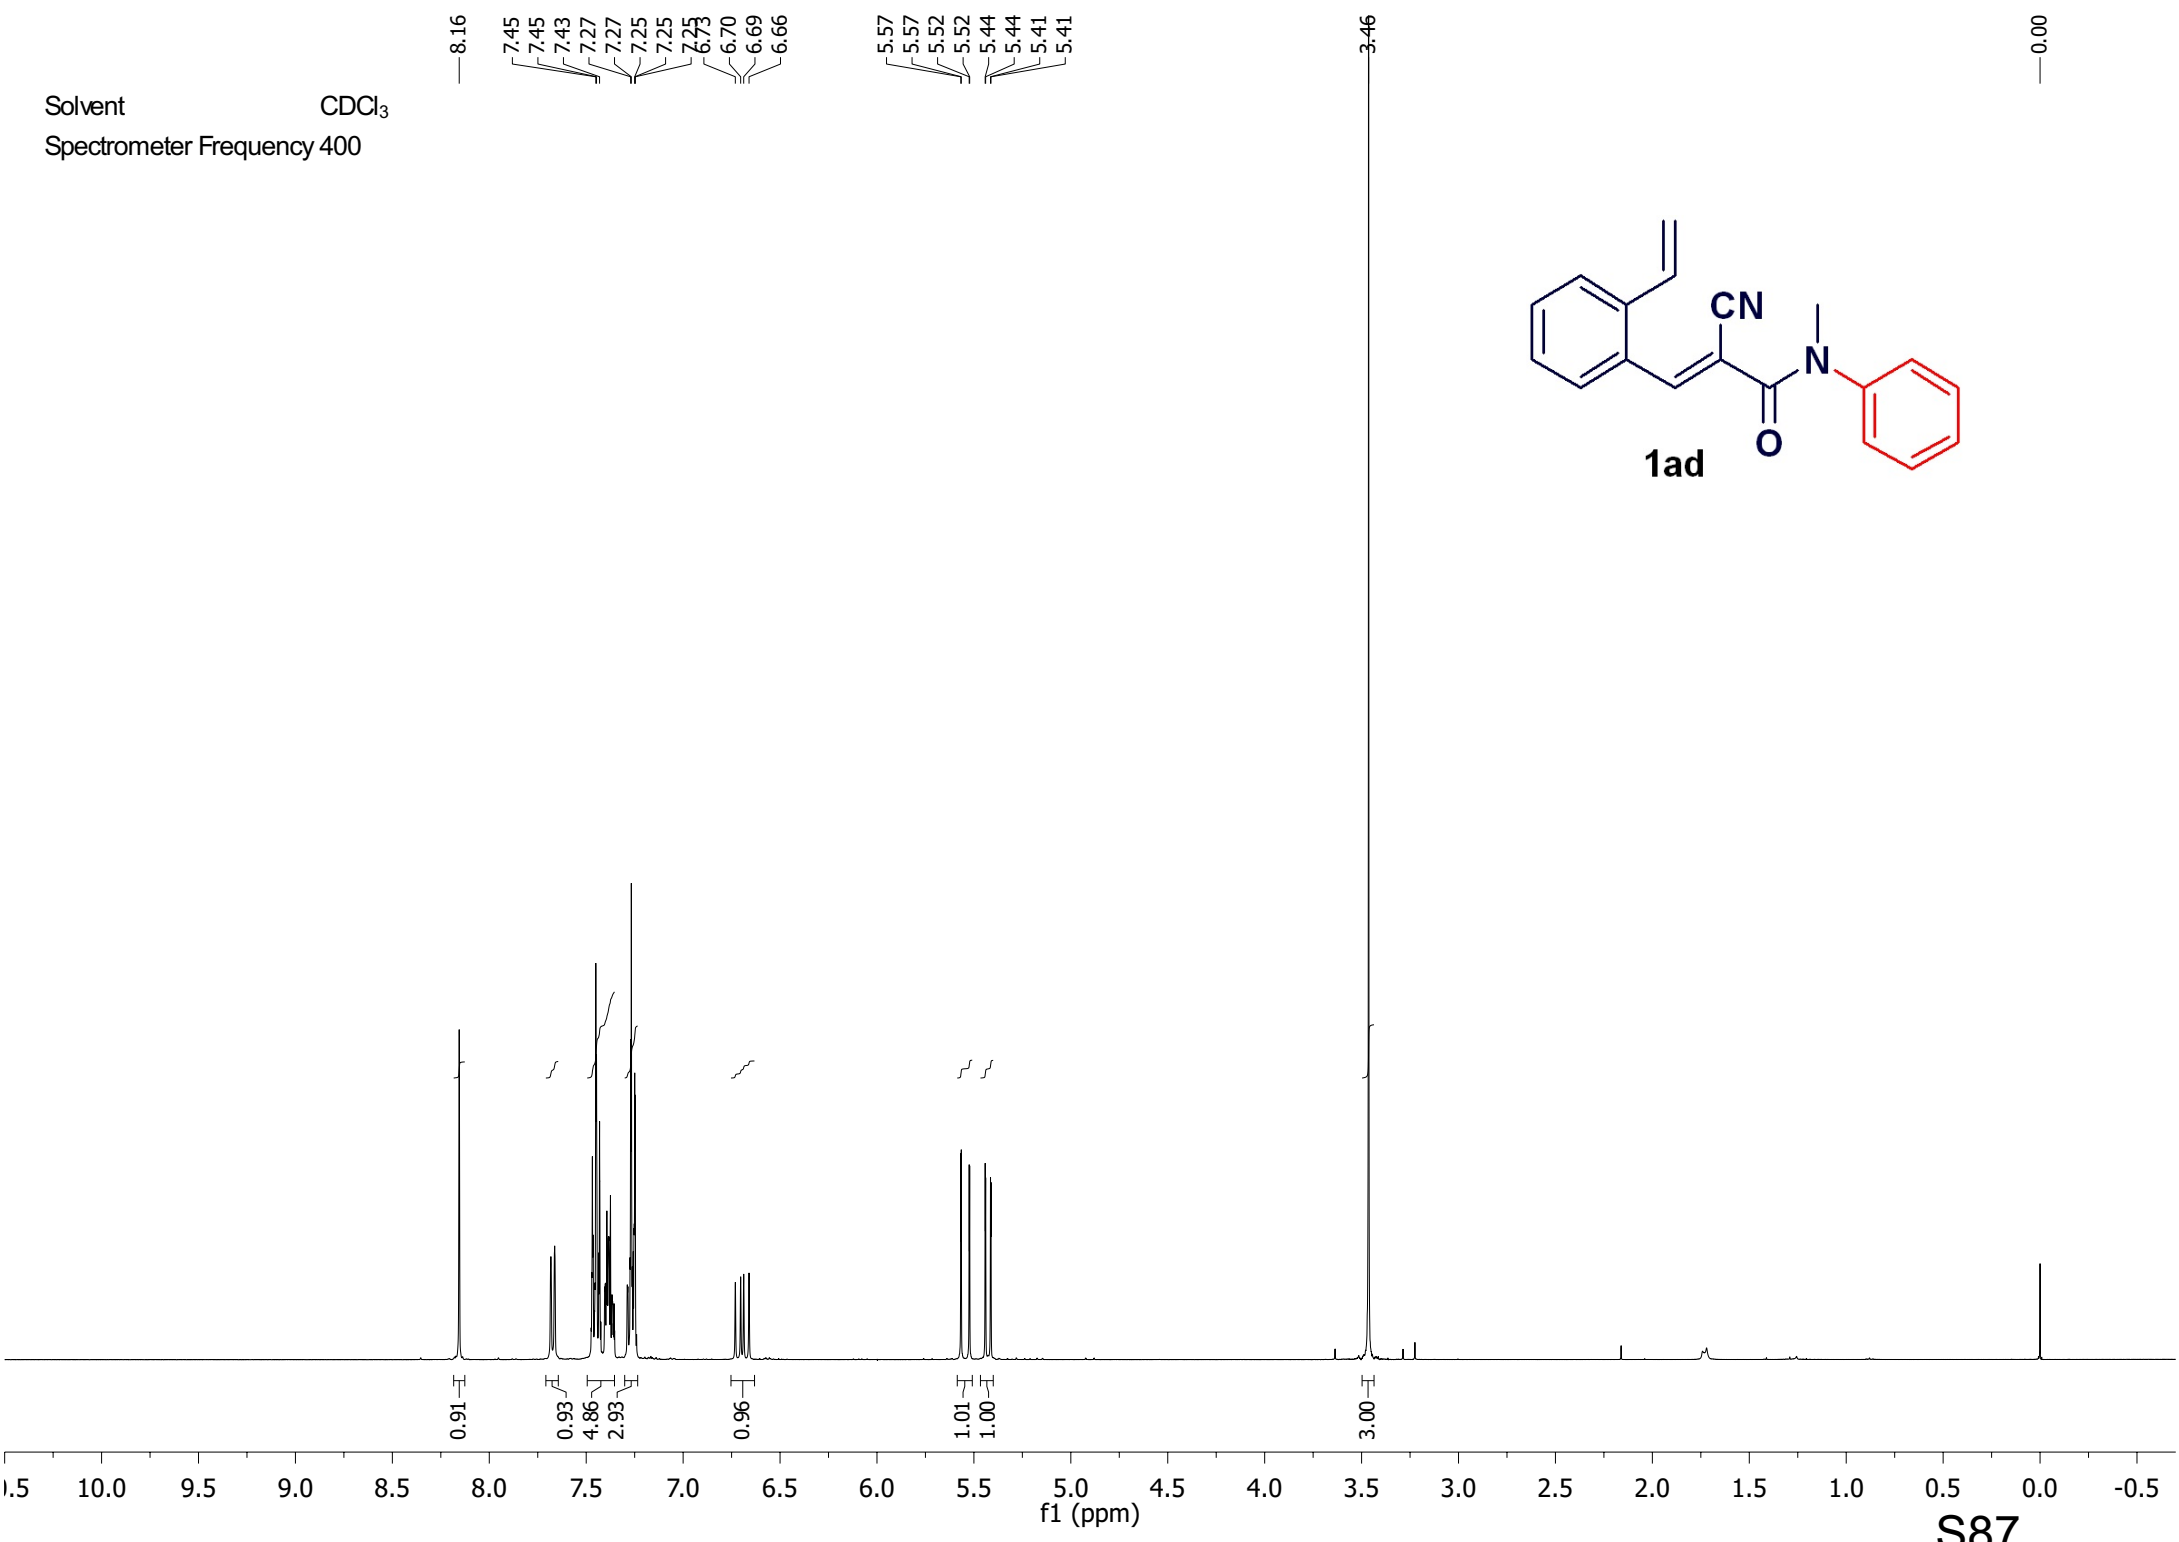

Solvent  $\text{CDCl}_3$   
Spectrometer Frequency 100

—163.04  
—151.67  
—142.73  
—138.61  
133.56  
131.27  
129.83  
128.25  
128.08  
127.80  
126.97  
126.50  
114.53  
109.89  
109.72

77.31  
76.99  
76.67

—38.79

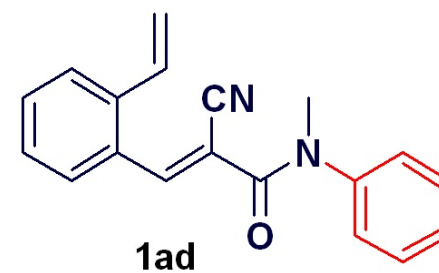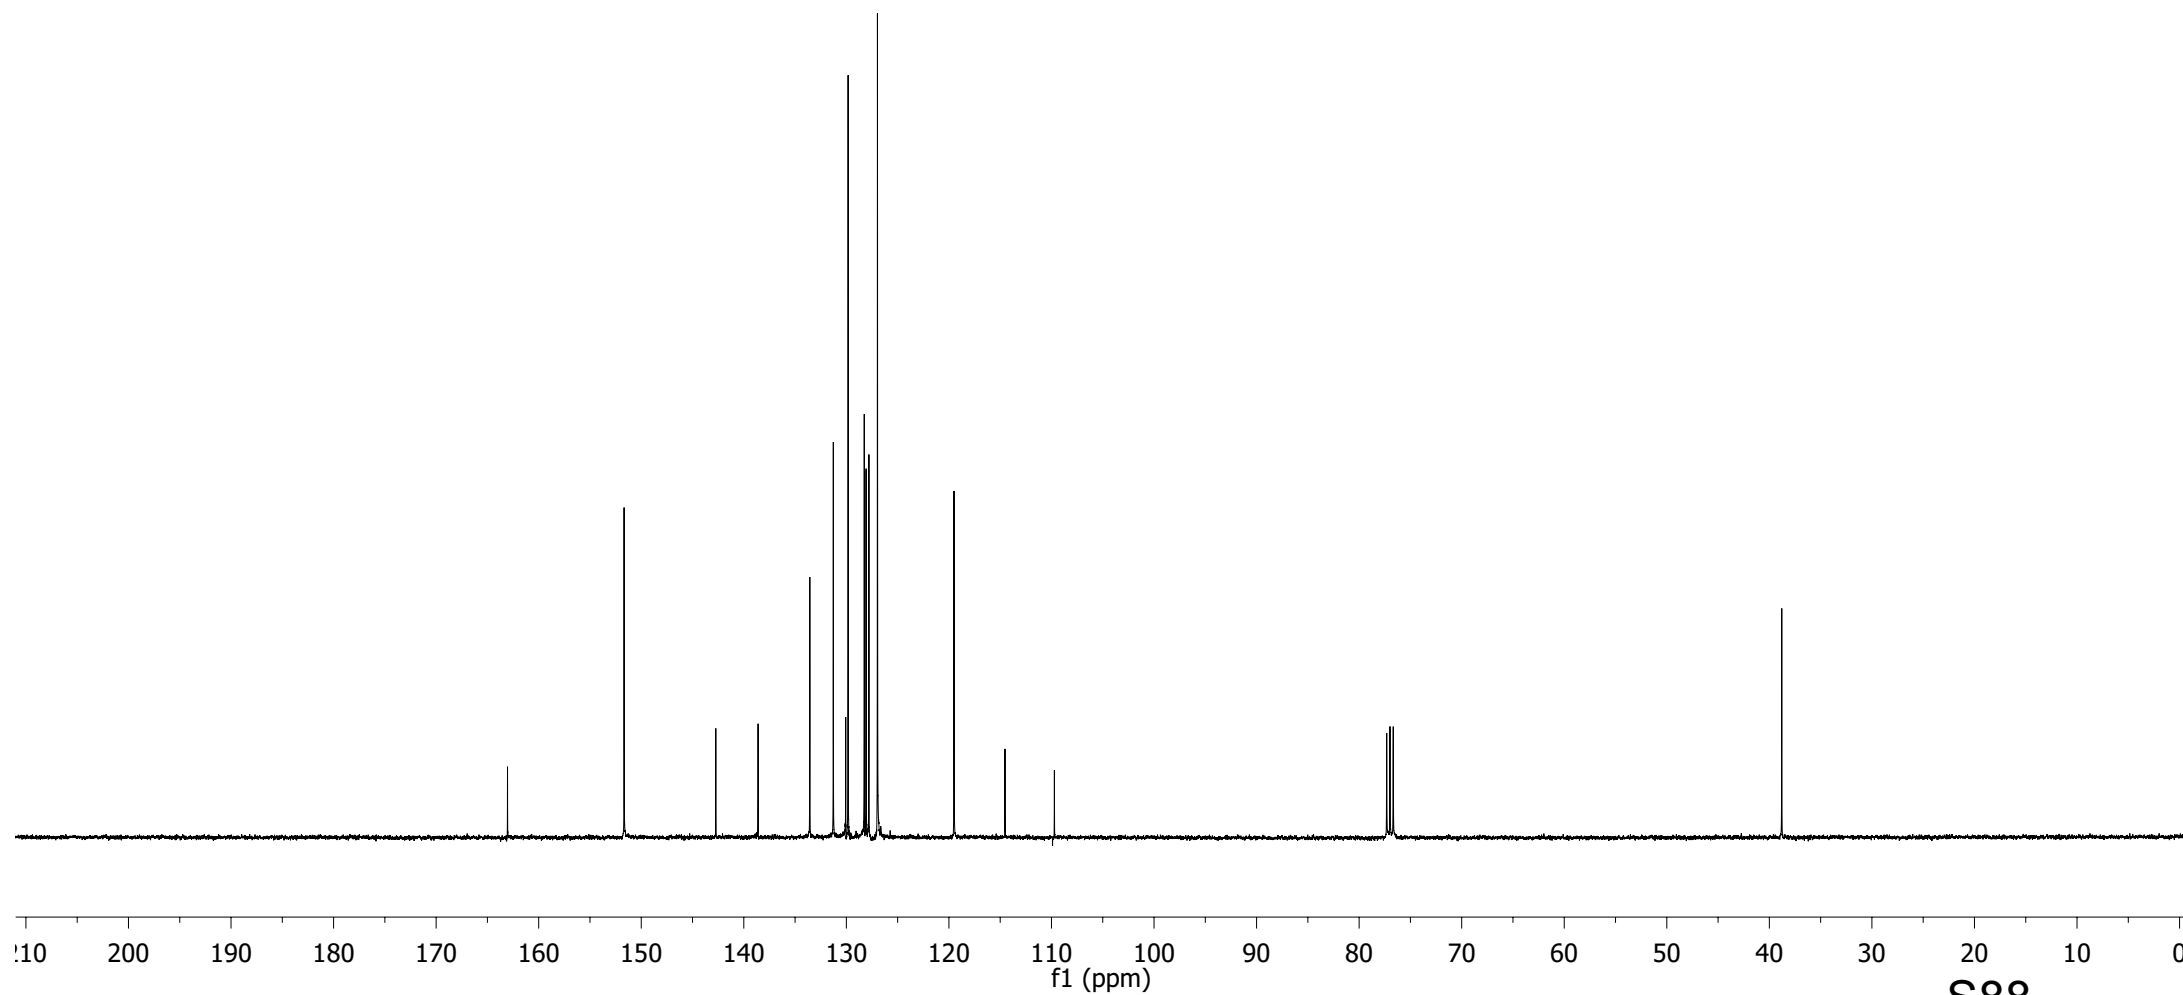

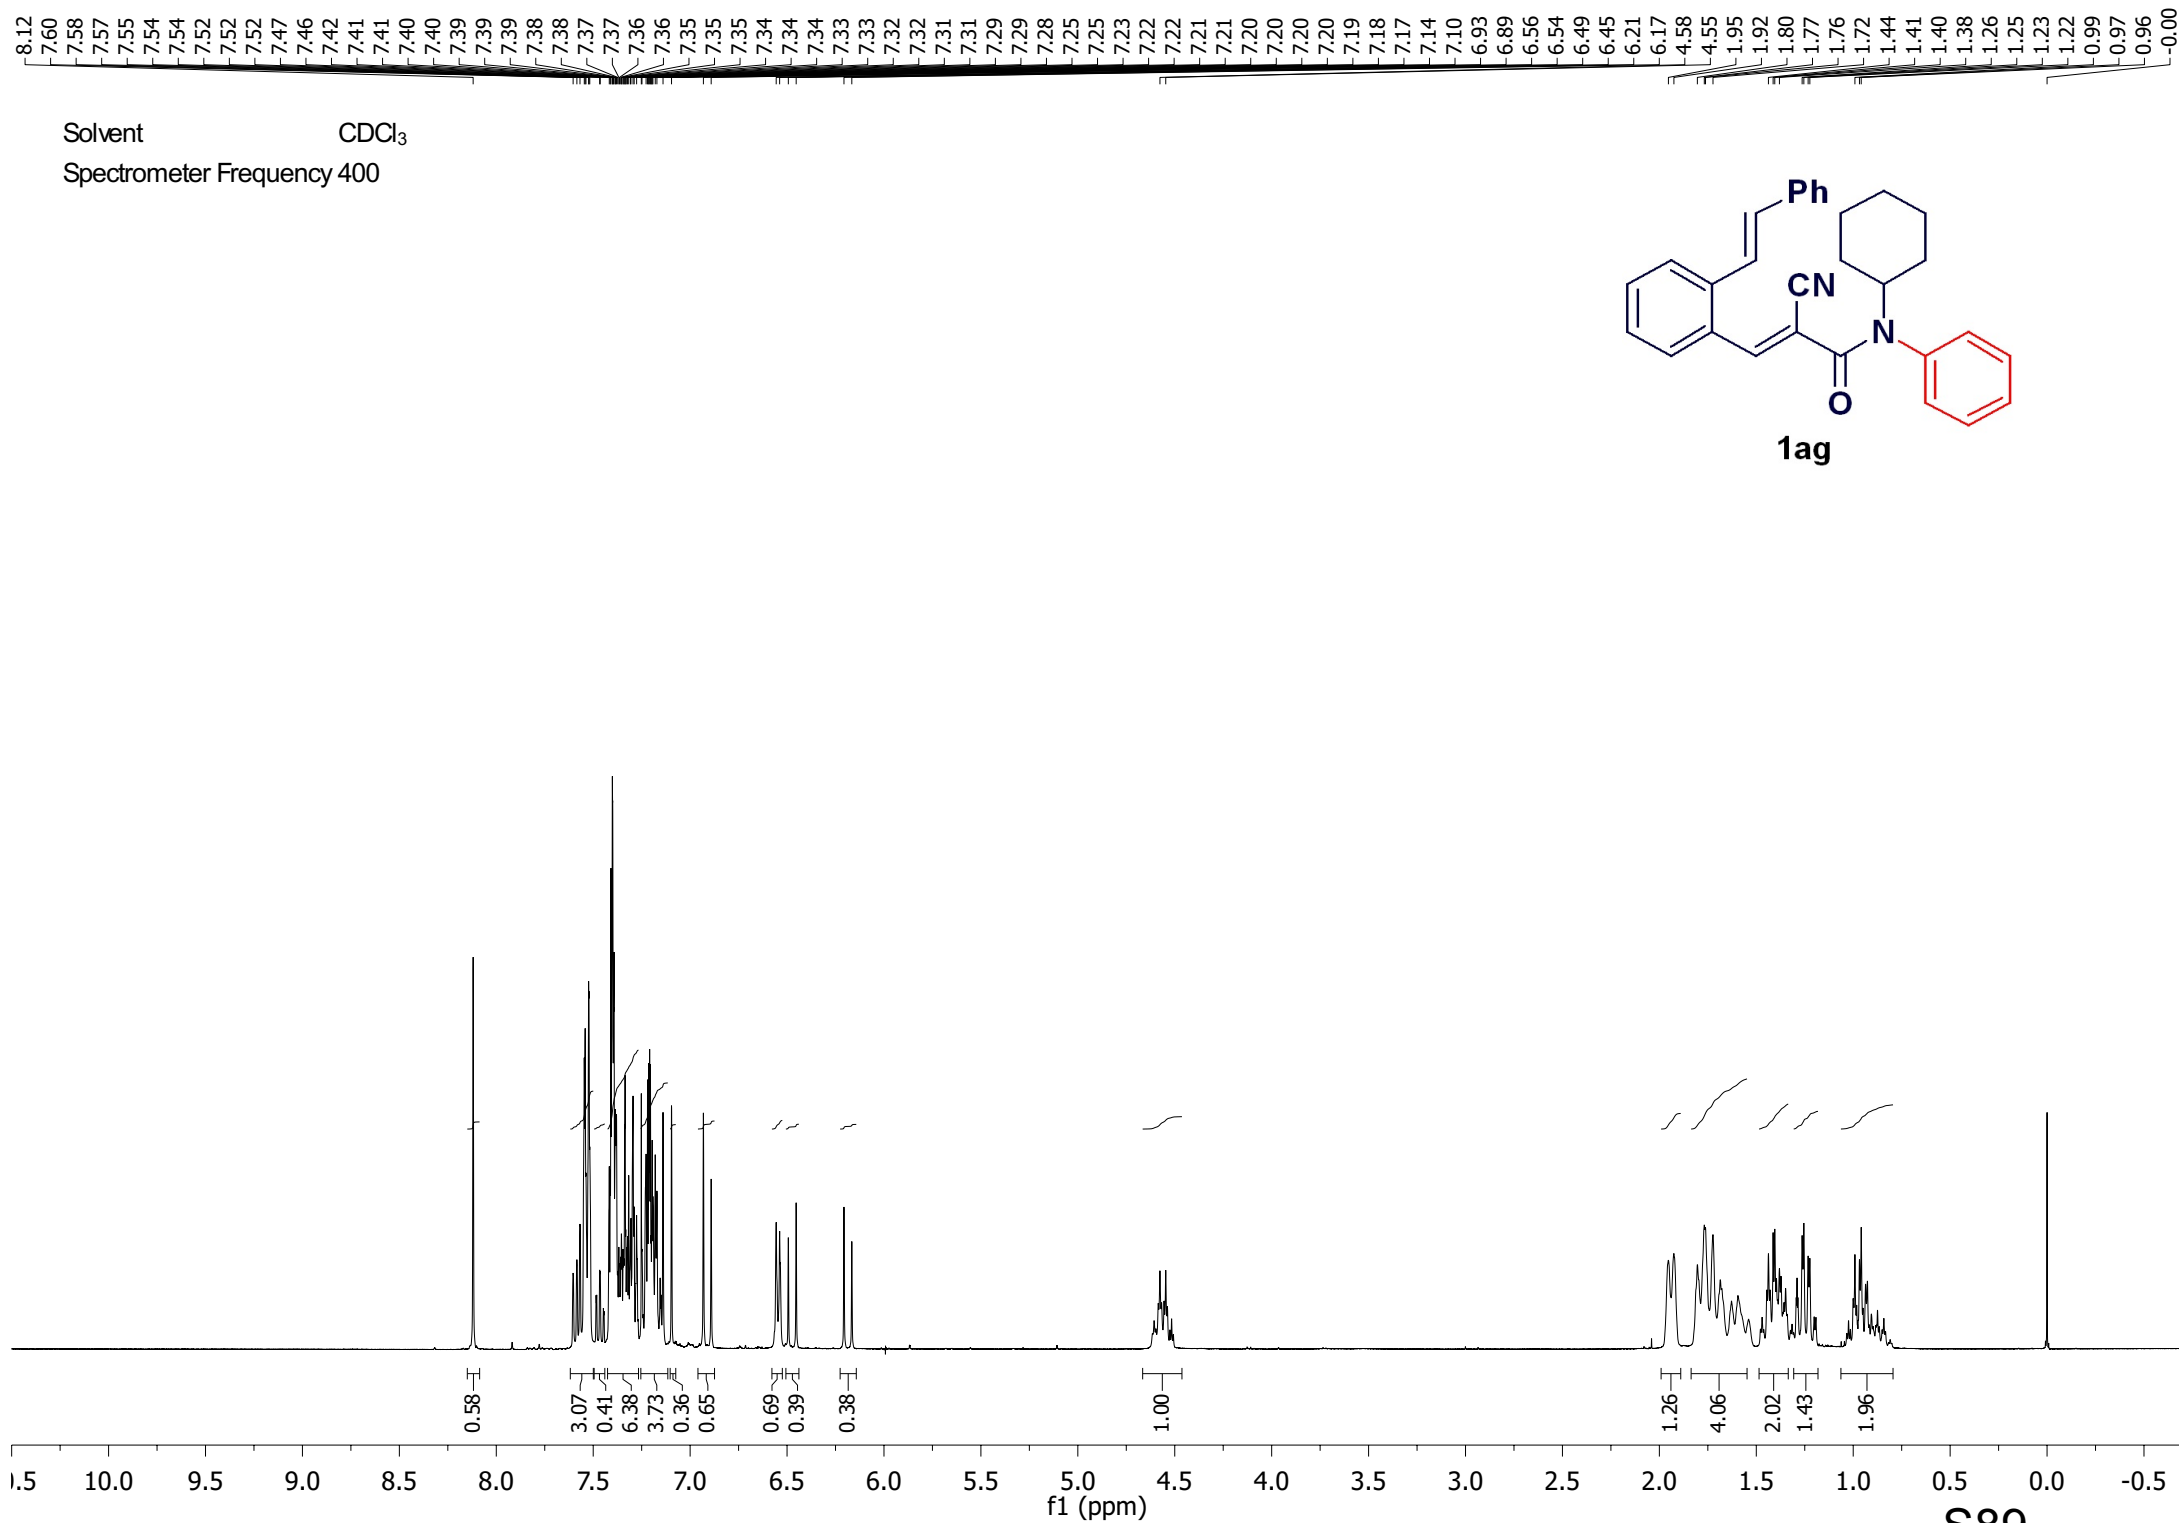

Solvent  $\text{CDCl}_3$   
Spectrometer Frequency 100

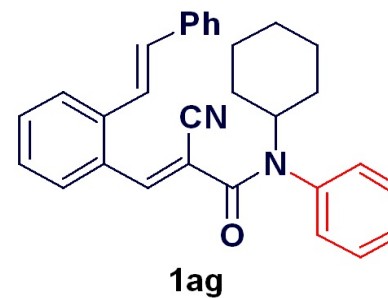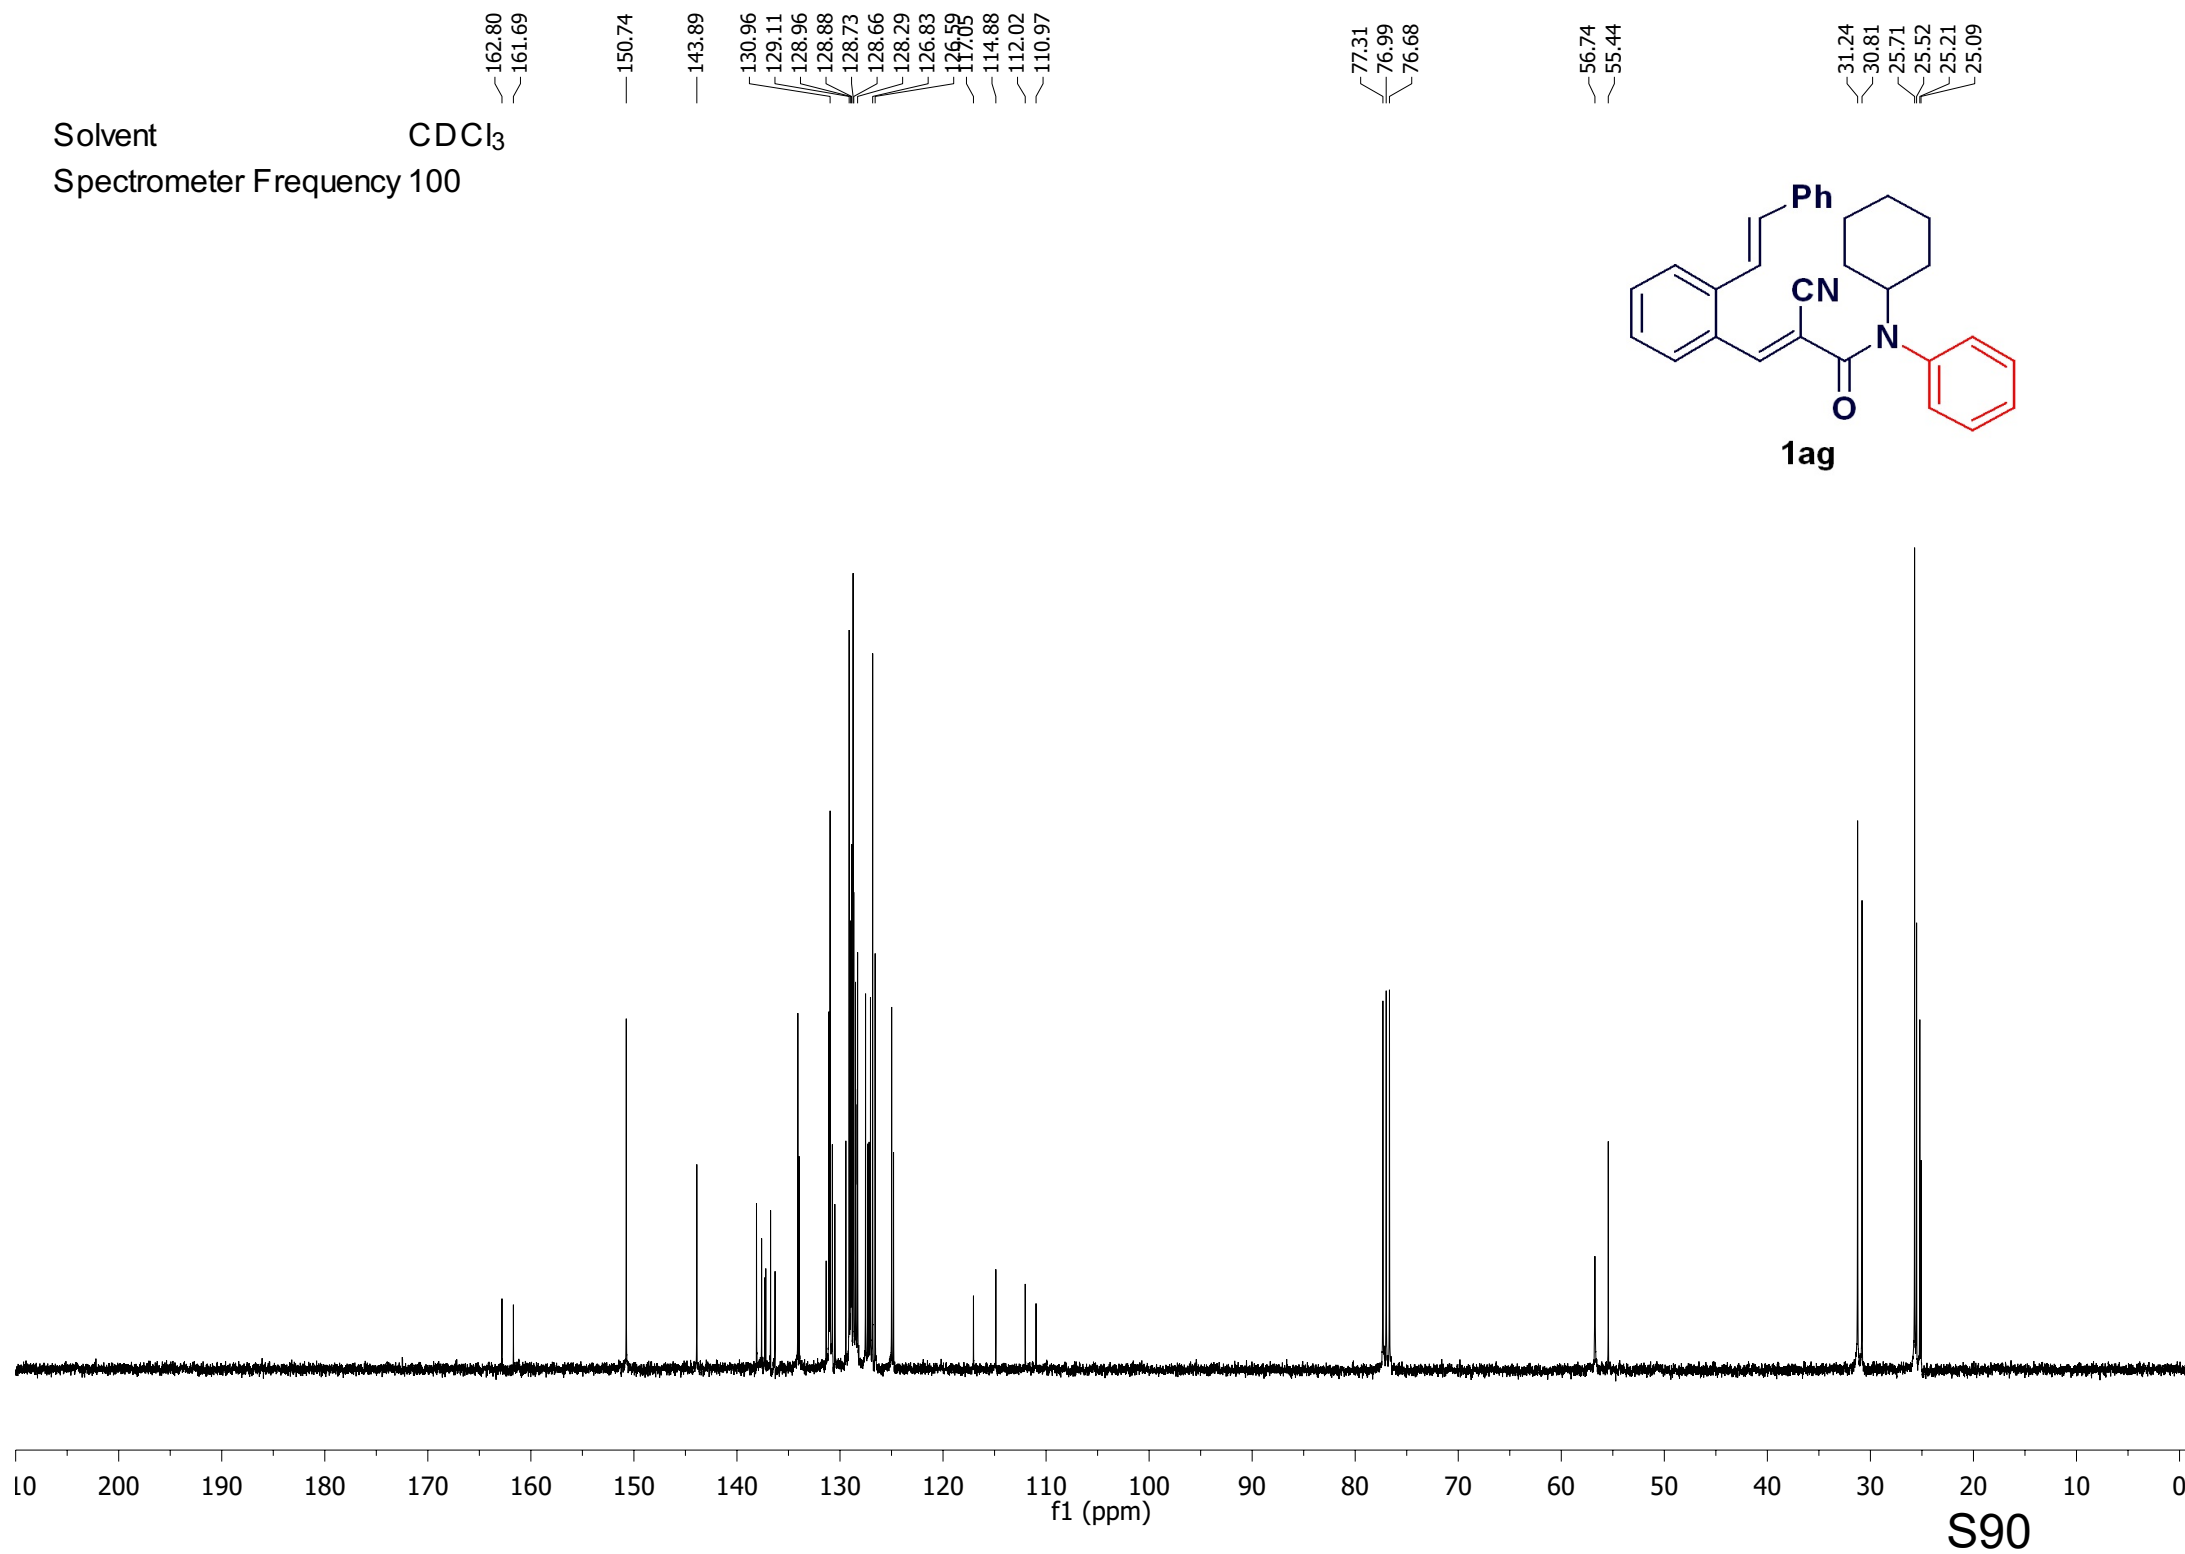

Solvent  
Spectrometer Frequency 400

CDCl<sub>3</sub>

8.56 7.56 7.56 7.55 7.54 7.45 7.45 7.45 7.43 7.43 7.42 7.41 7.41 7.39 7.39 7.39 7.38 7.37 7.37 7.36 7.35 7.35 7.34 7.34 7.33 7.32 7.32 7.31 7.31 7.26 7.26 7.25 7.24 7.24 7.13 7.09 3.47

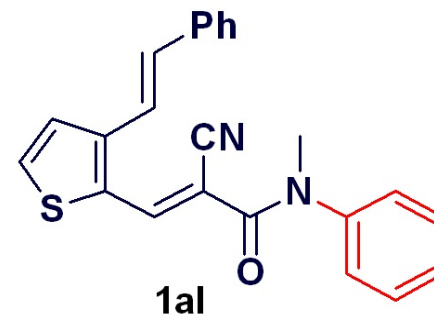

2.04

1.26

-0.00

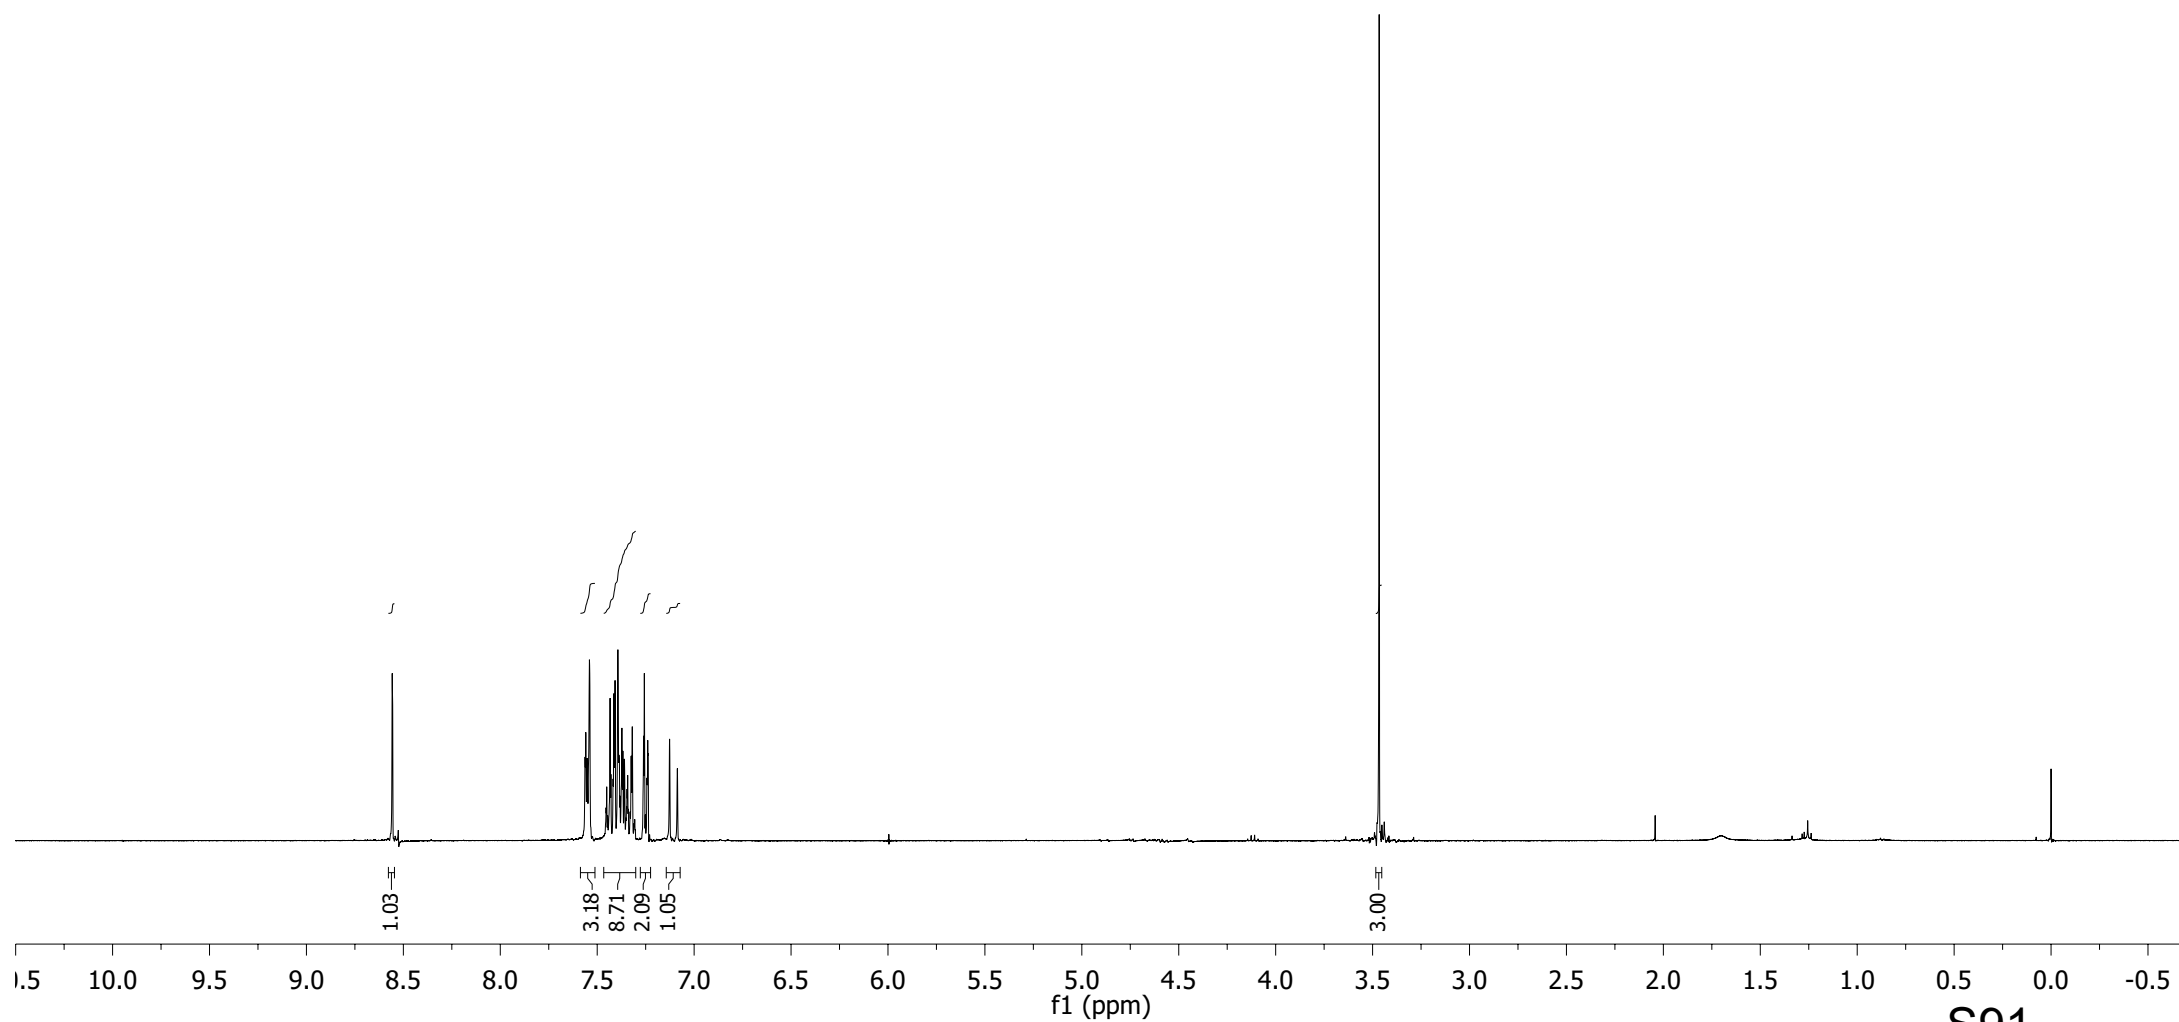

S91

Solvent  $\text{CDCl}_3$   
Spectrometer Frequency 100

146.79  
143.11  
142.88  
133.70  
129.81  
128.79  
128.66  
128.12  
127.04  
126.90  
125.98  
115.38  
101.85  
77.31  
76.99  
76.67

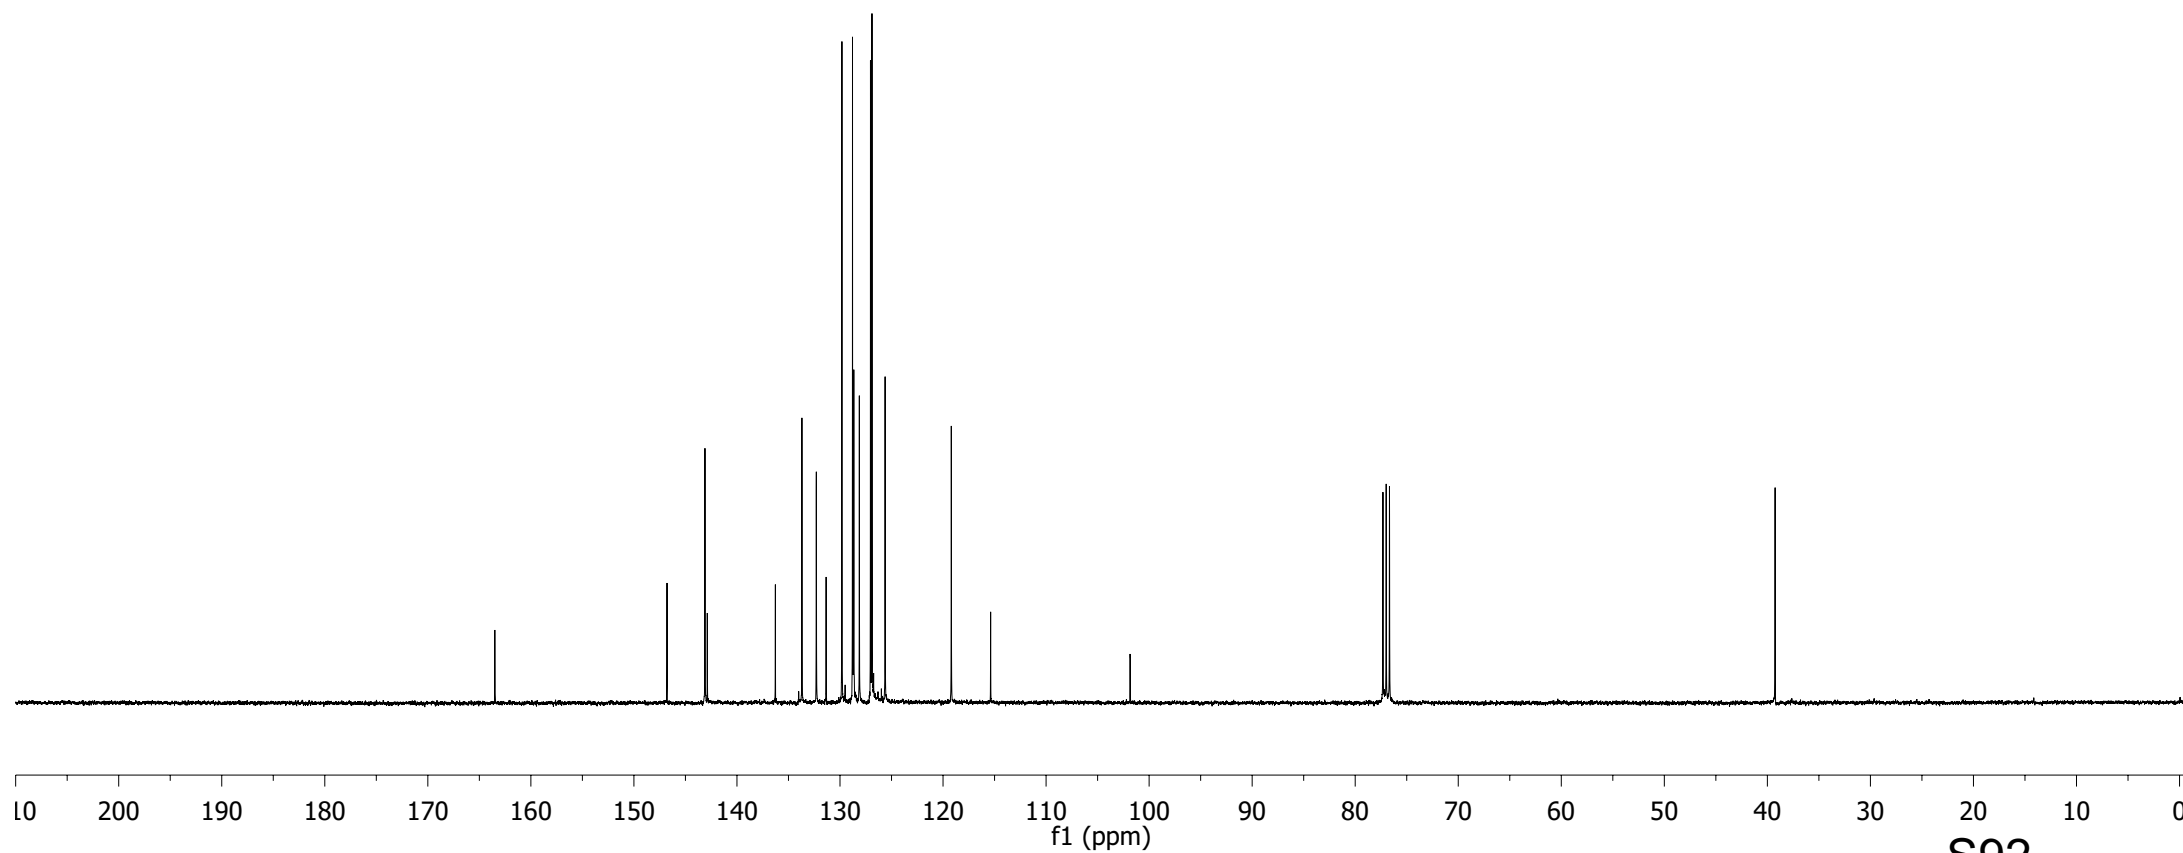

Solvent  $\text{CDCl}_3$   
Spectrometer Frequency 400

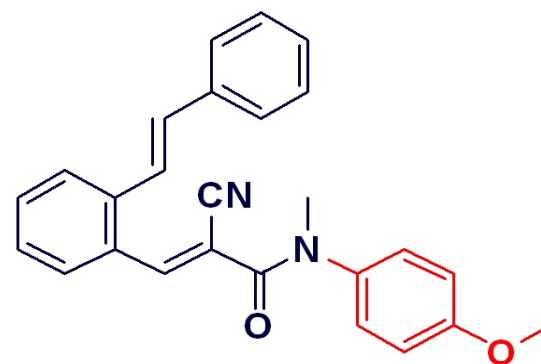

**1aq**

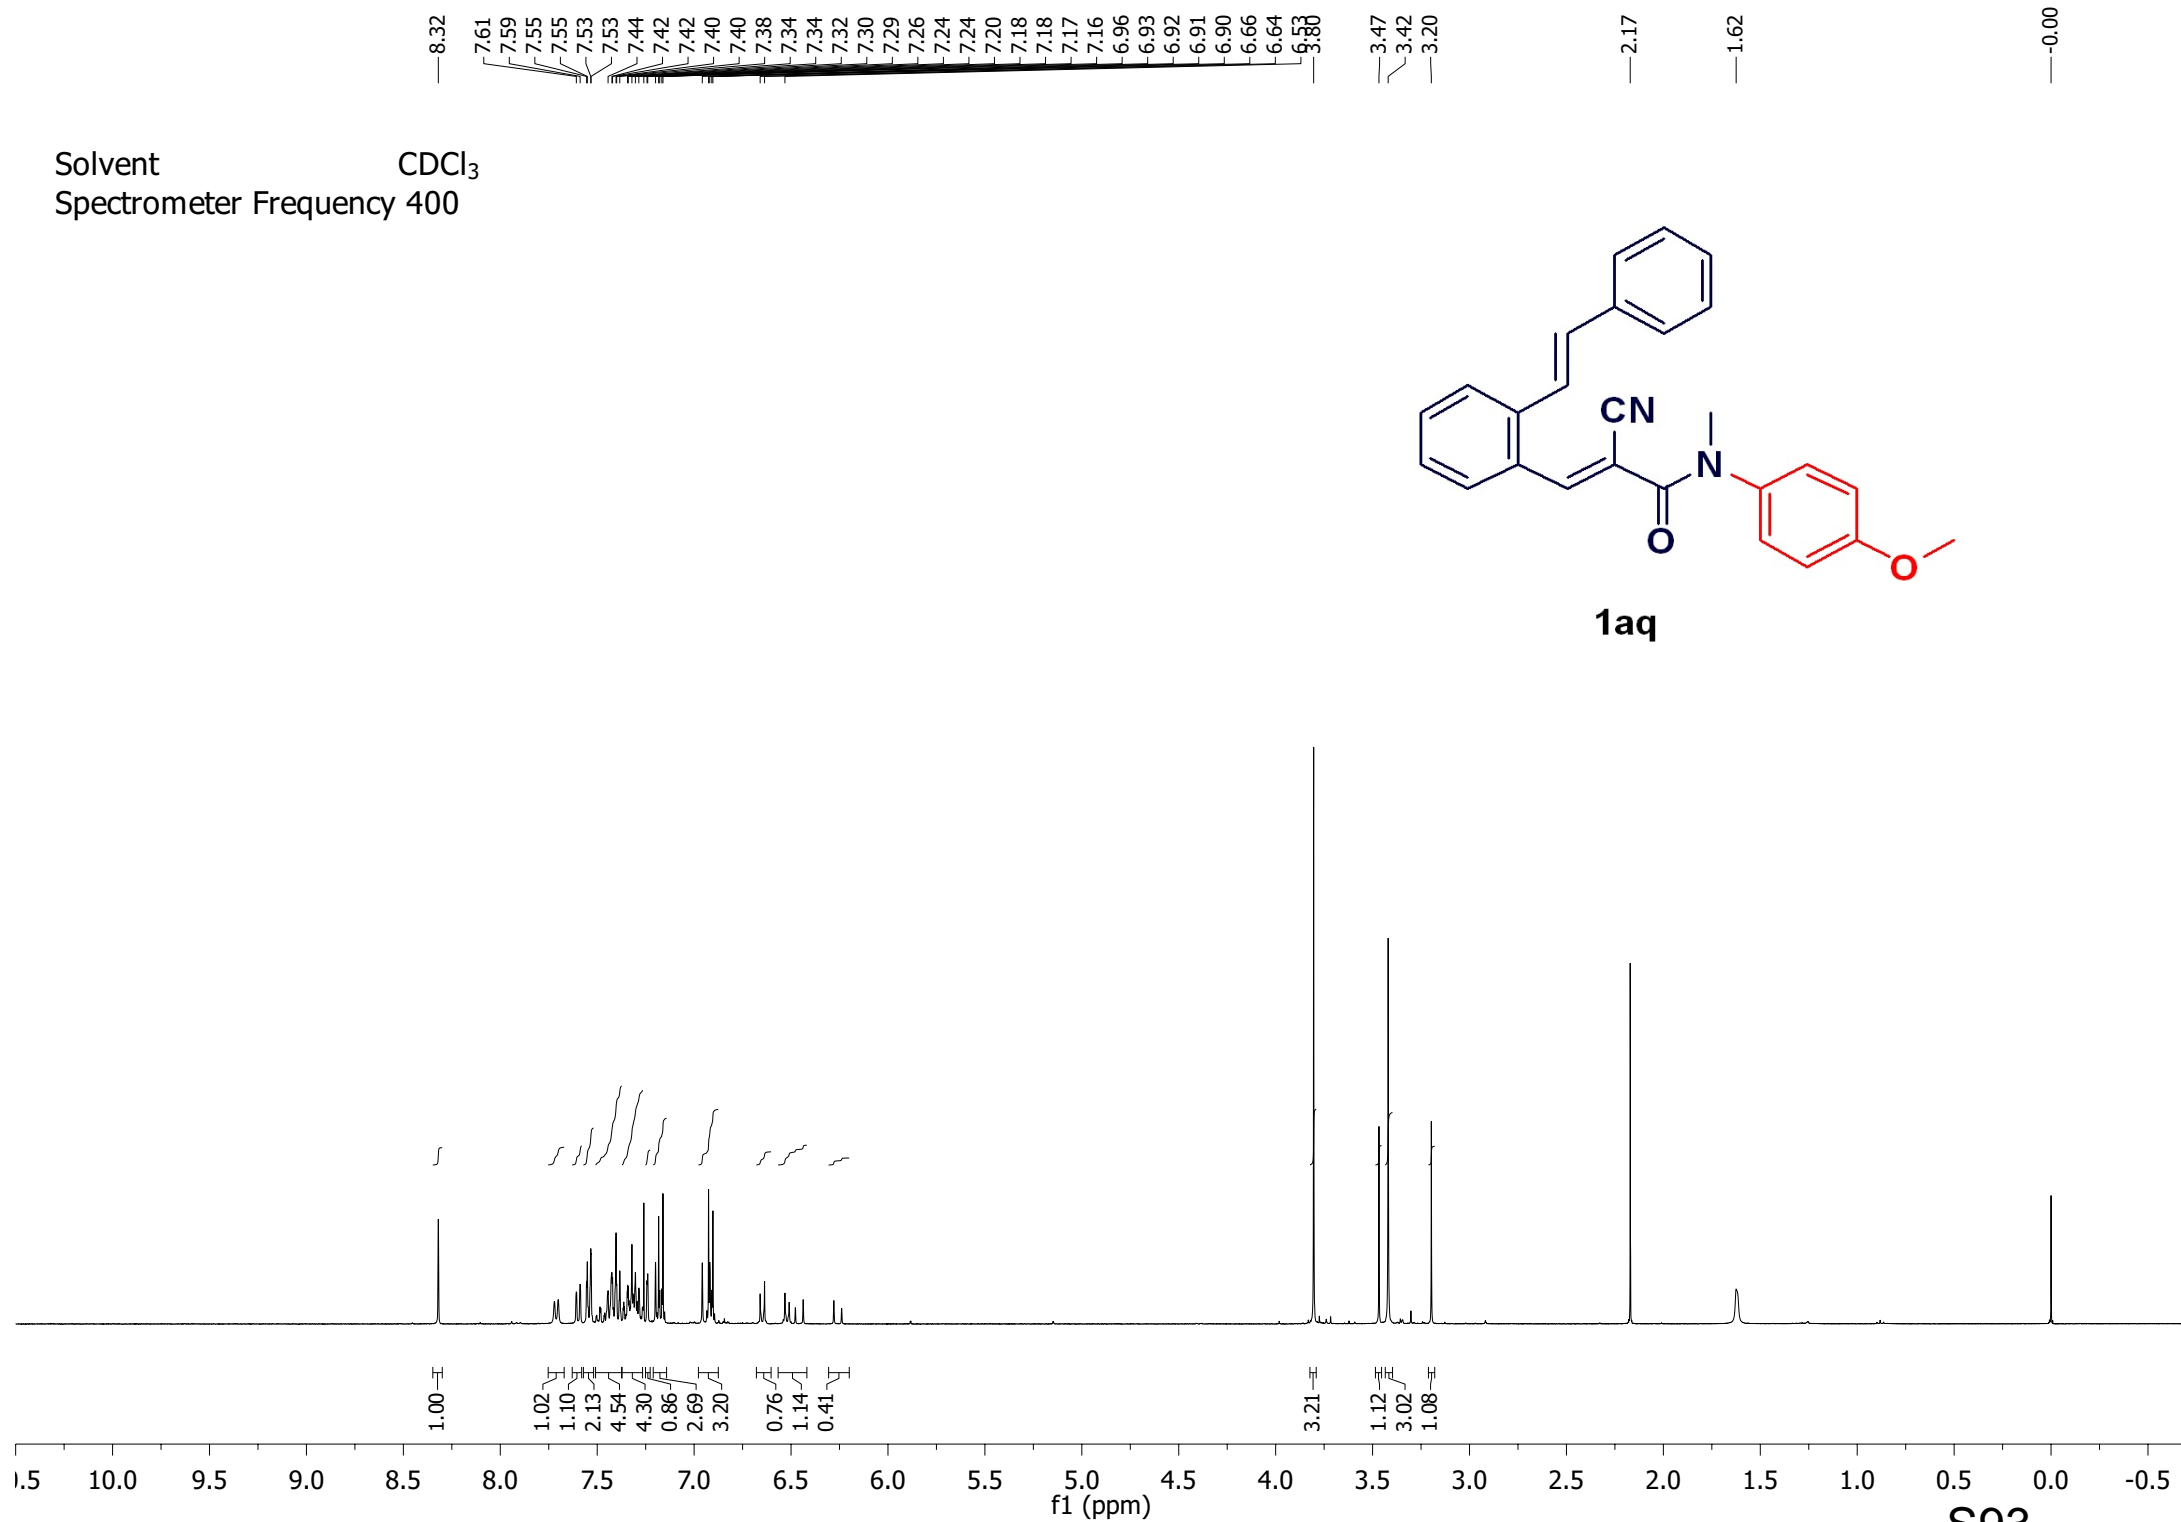

Solvent  $\text{CDCl}_3$   
Spectrometer Frequency 100

163.17  
159.25  
158.93  
151.48  
145.27  
134.24  
131.34  
128.77  
128.57  
128.40  
128.36  
127.62  
127.14  
126.87  
124.91  
114.95  
114.66  
114.22  
109.94

77.31  
76.99  
76.67

55.44  
55.01

39.08  
37.28

30.92



1aq

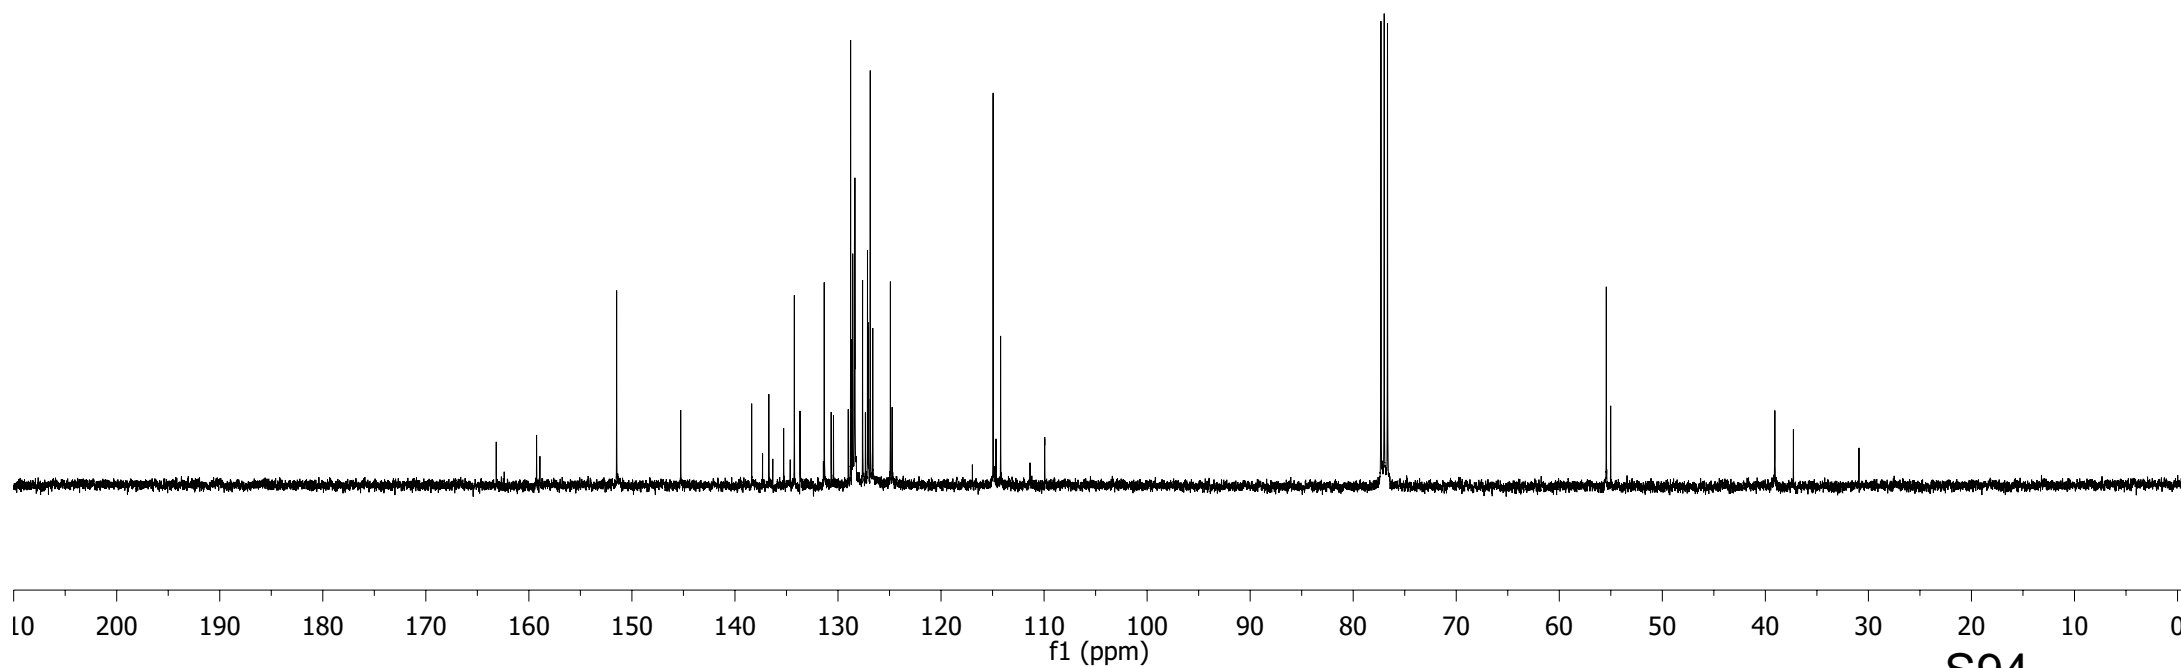



Solvent

CDCl<sub>3</sub>

Spectrometer Frequency 100

171.35

138.33

137.82

129.01

127.98

127.96

127.92

127.83

127.56

127.48

77.31

76.99

76.67

65.03

53.82

51.82

50.92

47.29

44.26

27.52

138.33

137.82

132.07

129.01

128.83

128.39

127.98

127.96

127.92

127.83

127.56

127.48

122.47

121.02

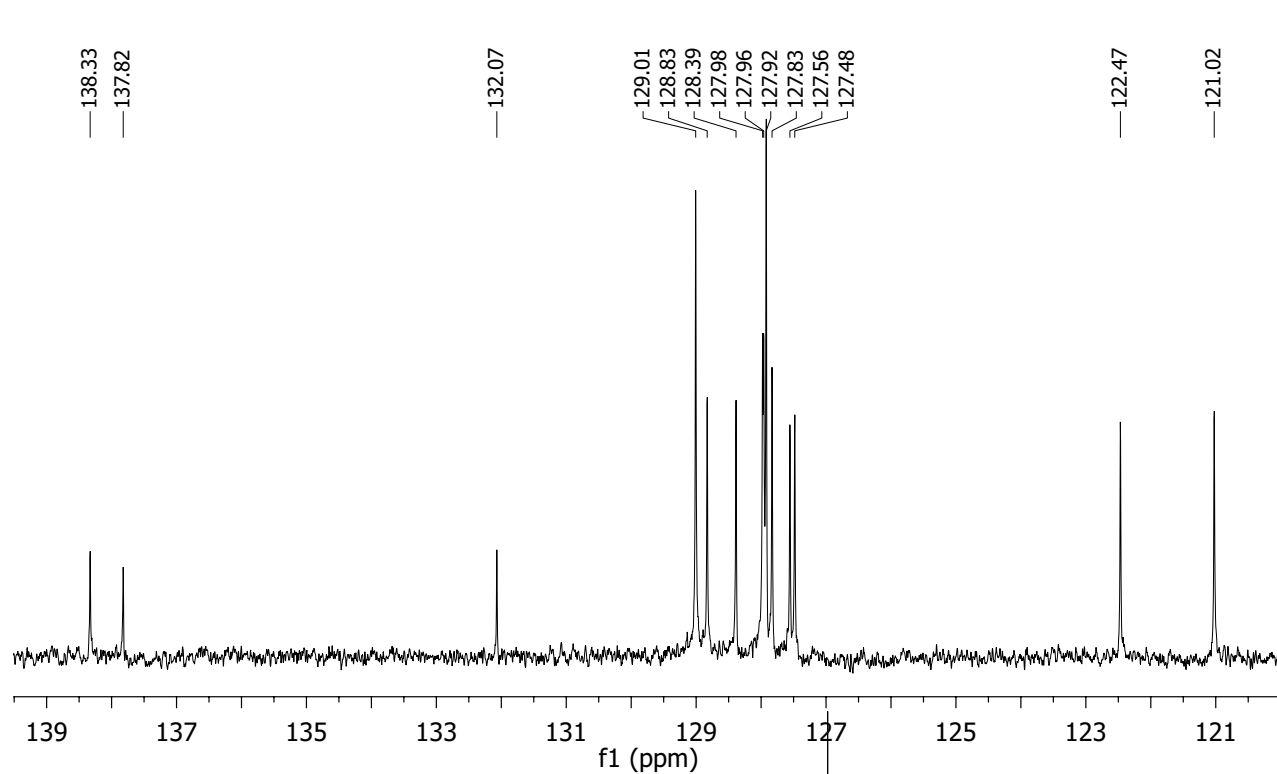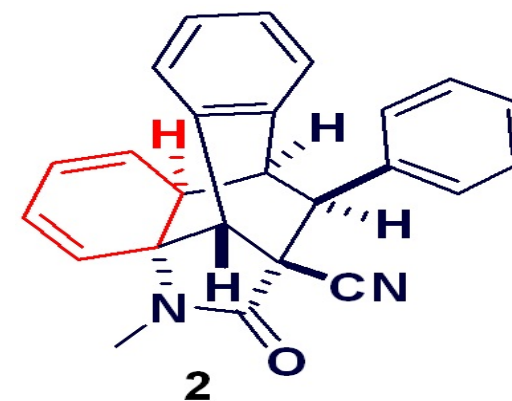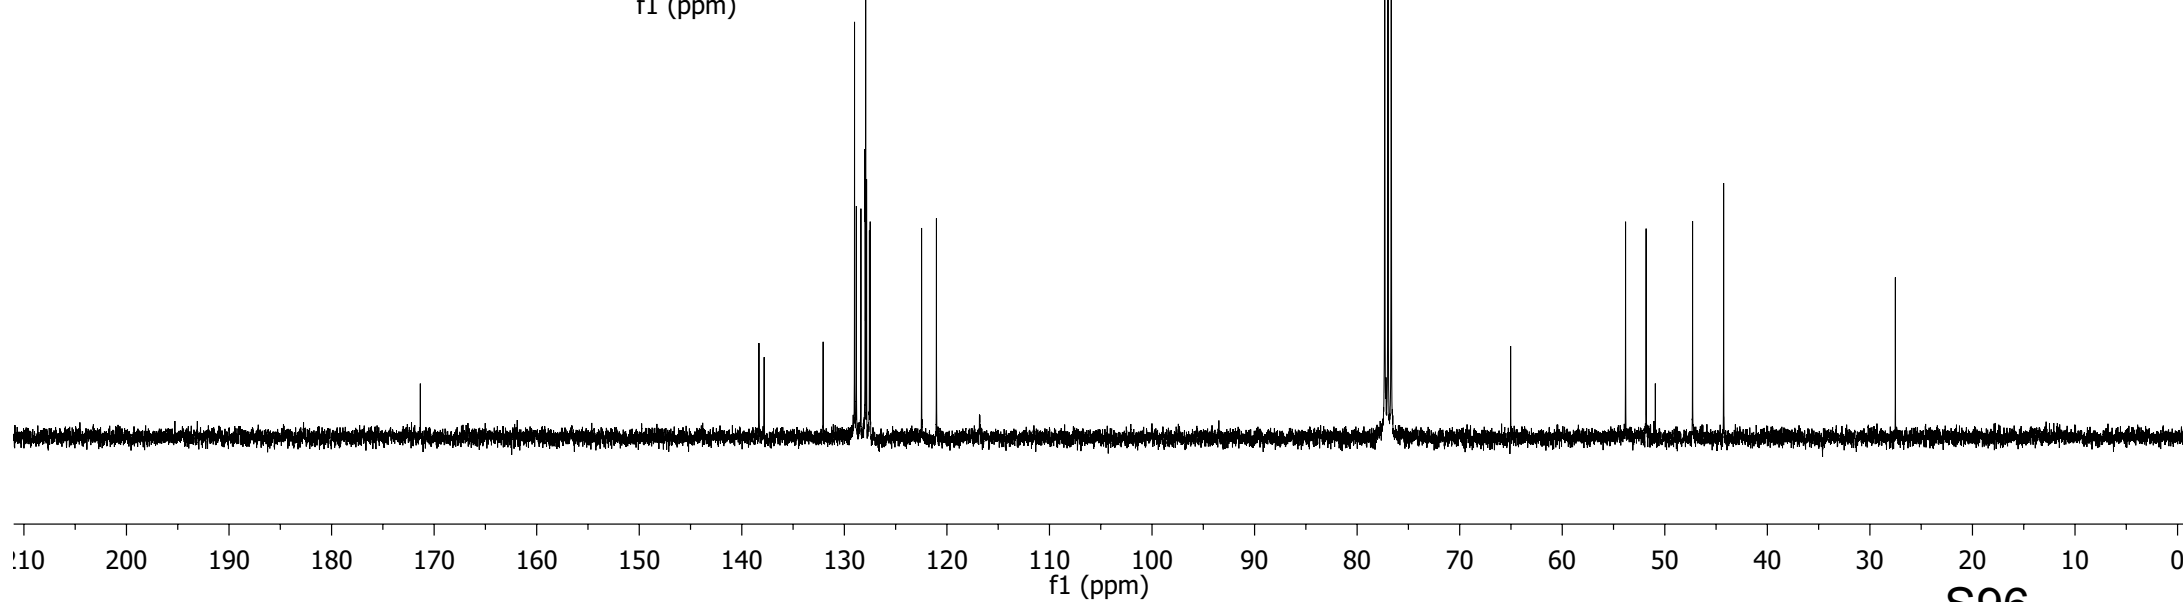

S96

Solvent  $\text{CDCl}_3$   
Spectrometer Frequency 600

7.26  
7.20  
7.19  
7.18  
7.15  
7.14  
7.12  
6.95  
6.52  
6.50  
6.43  
6.02  
6.02  
5.99  
5.99  
5.88  
5.87  
5.86  
5.85  
5.47  
5.47  
5.46  
5.46  
5.45  
5.45  
5.45  
5.30  
5.28  
5.28  
5.27  
5.26  
5.26  
3.68  
3.67  
3.50  
3.32  
3.15  
3.14  
2.96

7.26  
7.20  
7.19  
7.18  
7.15  
7.14  
7.12  
6.95

6.52  
6.50  
6.43

6.02  
6.02  
5.99  
5.99  
5.88  
5.87  
5.86  
5.85

5.48  
5.47  
5.47  
5.46  
5.46  
5.45  
5.45  
5.45  
5.30  
5.28  
5.28  
5.27

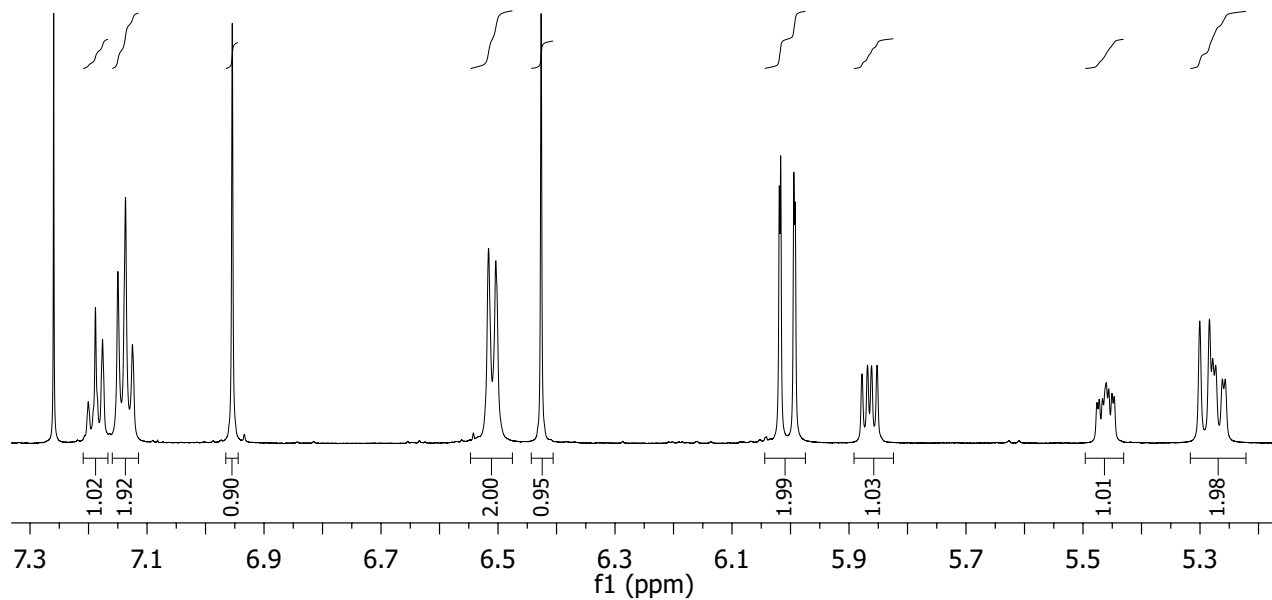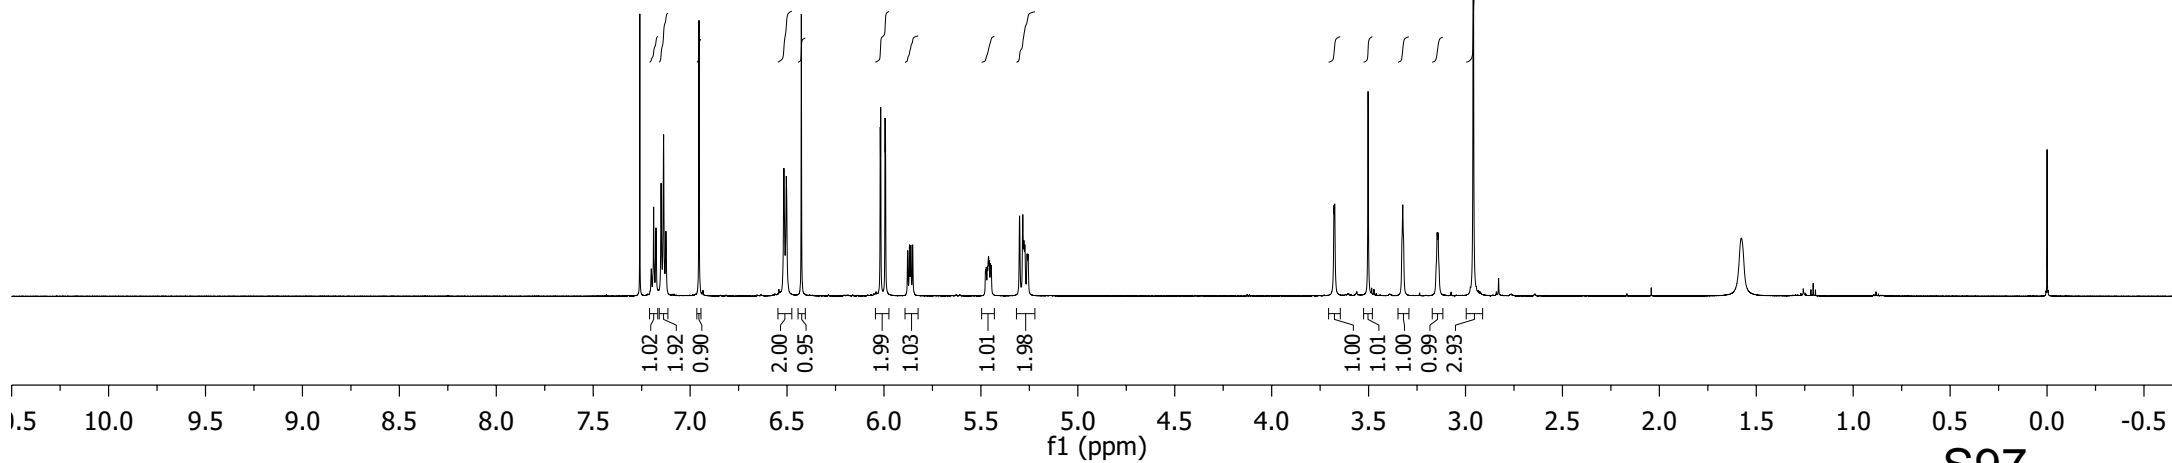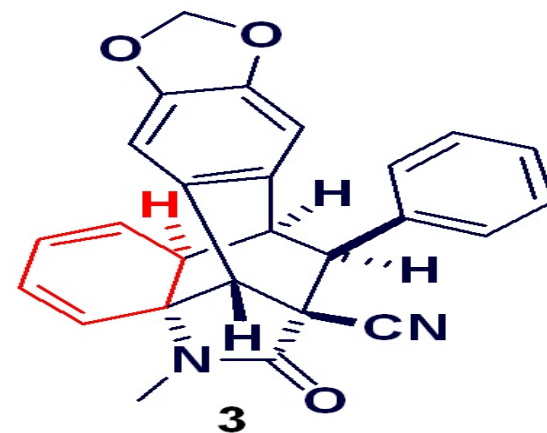

1.58

-0.00

Solvent  $\text{CDCl}_3$   
Spectrometer Frequency 150

—171.29  
—147.95  
—146.91  
—138.39  
—129.05  
—128.74  
—128.05  
—127.86  
—125.04  
—122.51  
—121.17  
—116.82  
—108.63  
—101.08  
77.20  
76.99  
76.78  
—64.98  
54.05  
52.03  
50.83  
47.49  
44.54  
—27.56

—147.95  
—146.91  
—138.39  
—131.61  
—129.05  
—128.74  
—128.05  
—127.86  
—125.04  
—122.51  
—121.17  
—116.82

148 146 144 142 140 138 136 134 132 130 128 126 124 122 120 118 116  
f1 (ppm)

230 220 210 200 190 180 170 160 150 140 130 120 110 100 90 80 70 60 50 40 30 20 10 0 -10  
f1 (ppm)



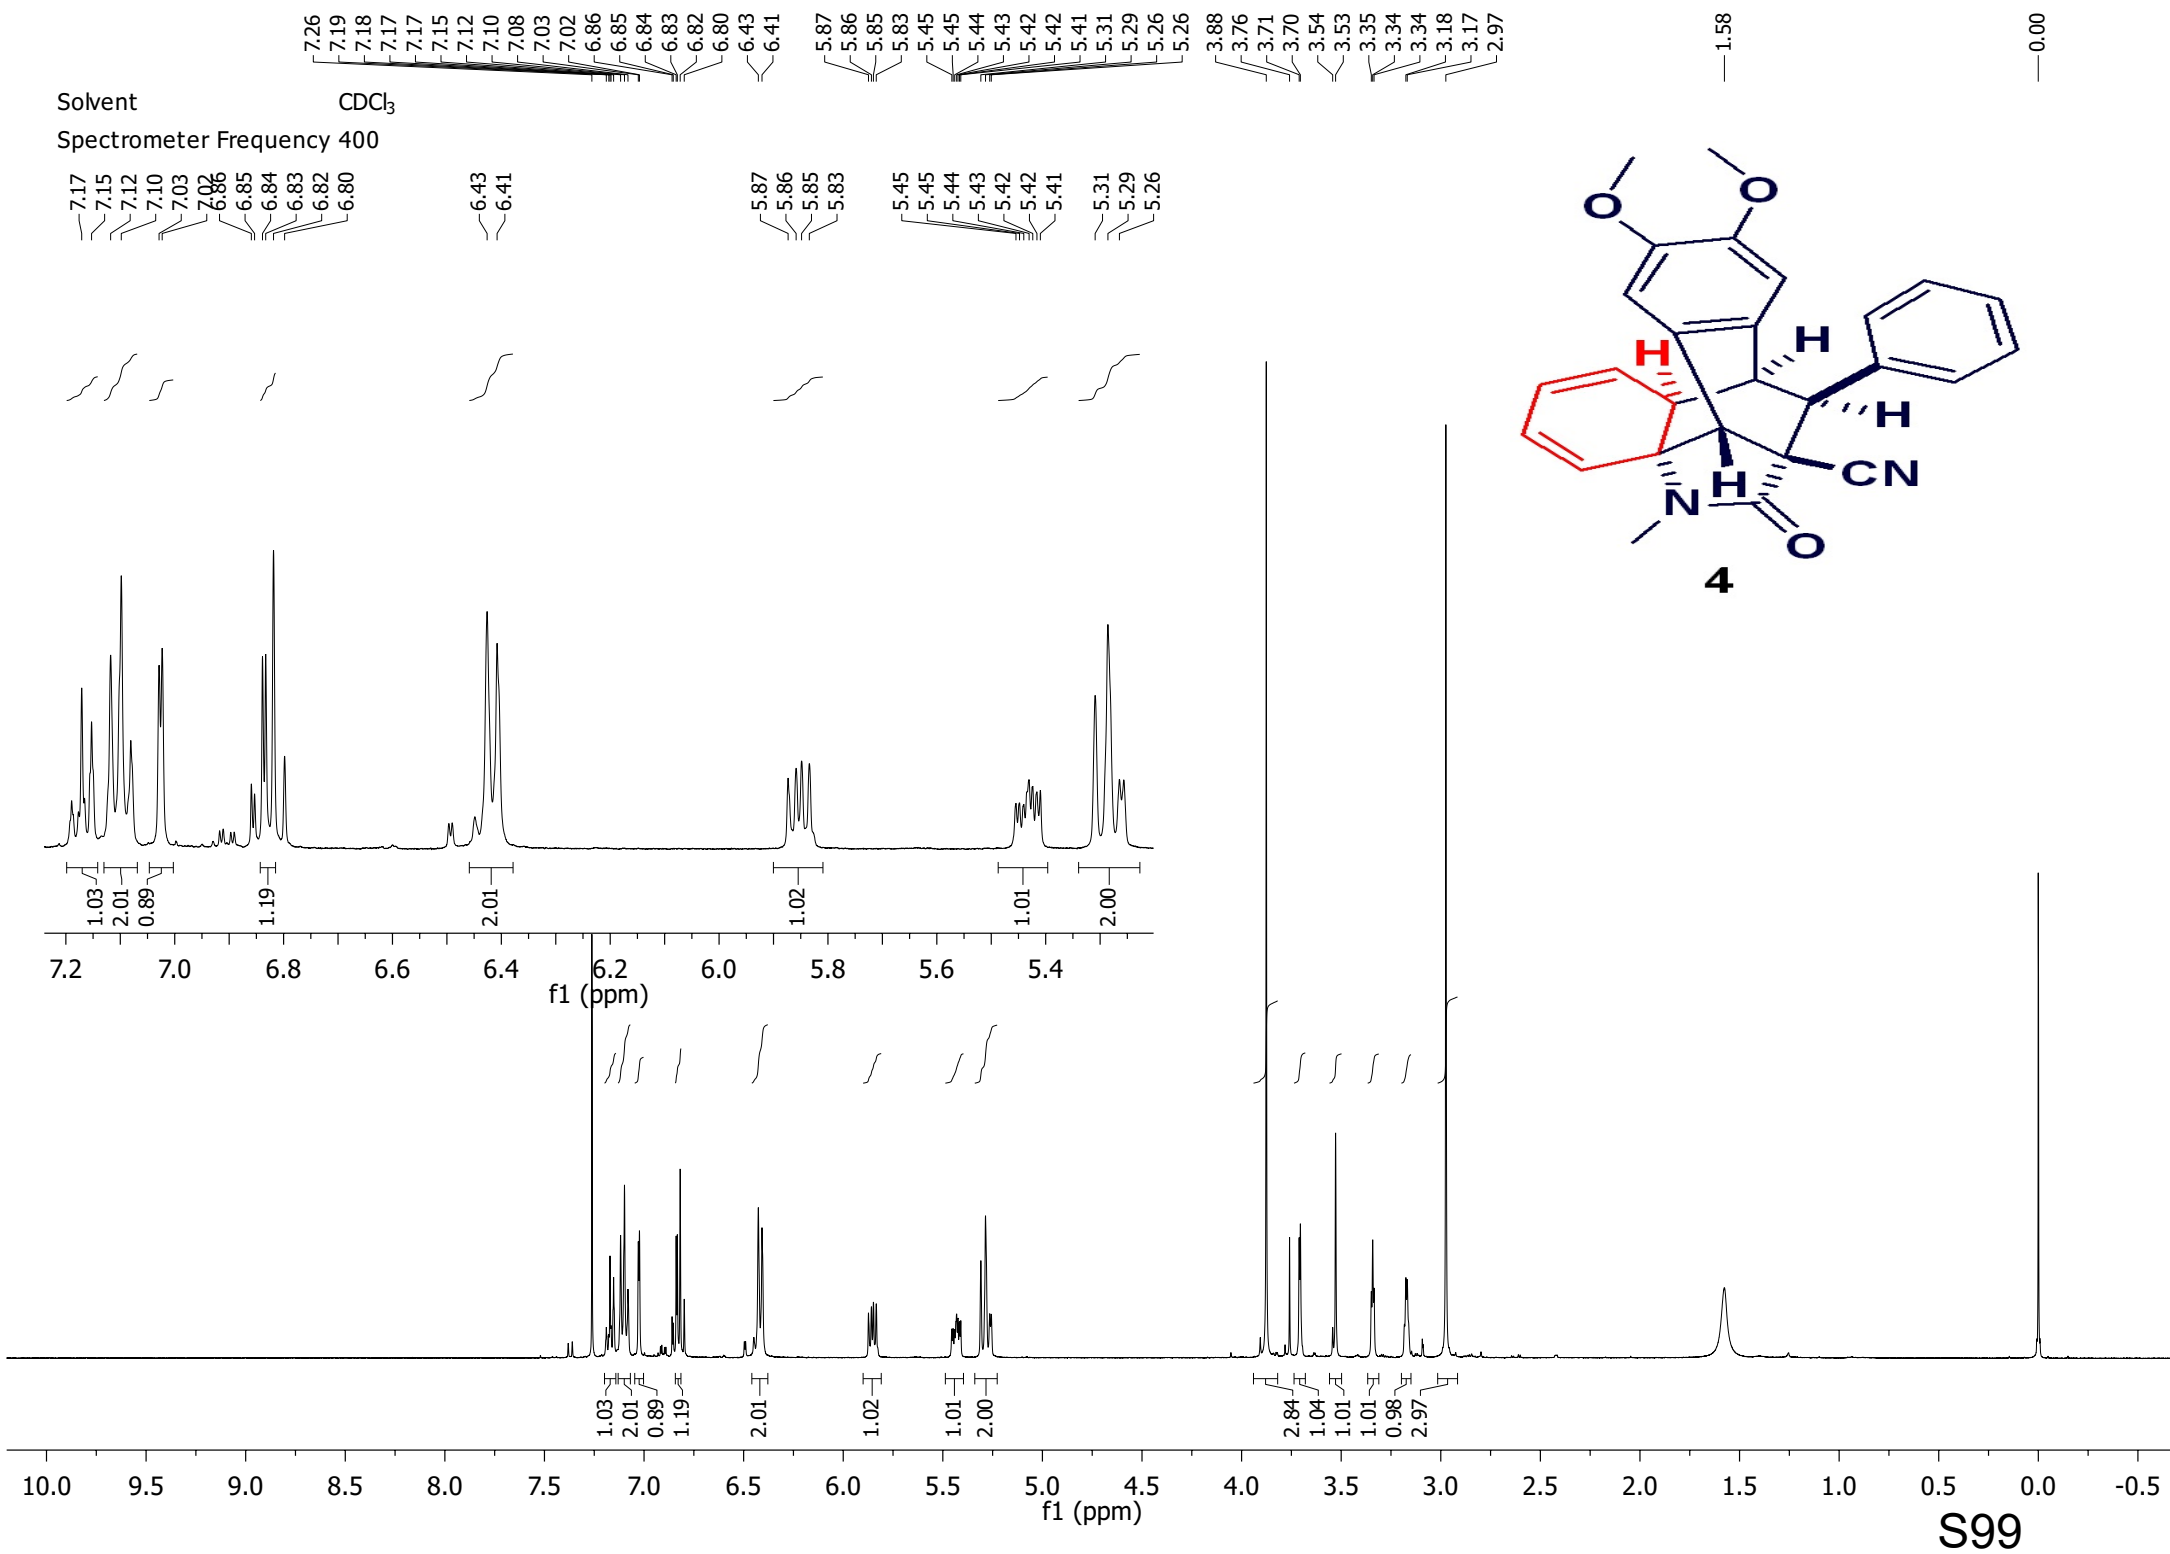

Solvent  $\text{CDCl}_3$   
Spectrometer Frequency 100

— 171.44 — 159.05  
138.47 133.19 129.74 129.64 129.07 129.02 128.34 128.12 127.91 127.80 122.36 120.99 116.82 120.99 116.82 113.92 113.46

77.31 77.00 76.68 — 65.04 — 55.35 54.21 52.12 46.59 44.45 — 27.51

— 138.47 — 133.19 129.74 129.64 129.07 129.02 128.34 128.12 127.91 127.80 — 122.36 — 120.99 — 116.82 — 113.92 113.46

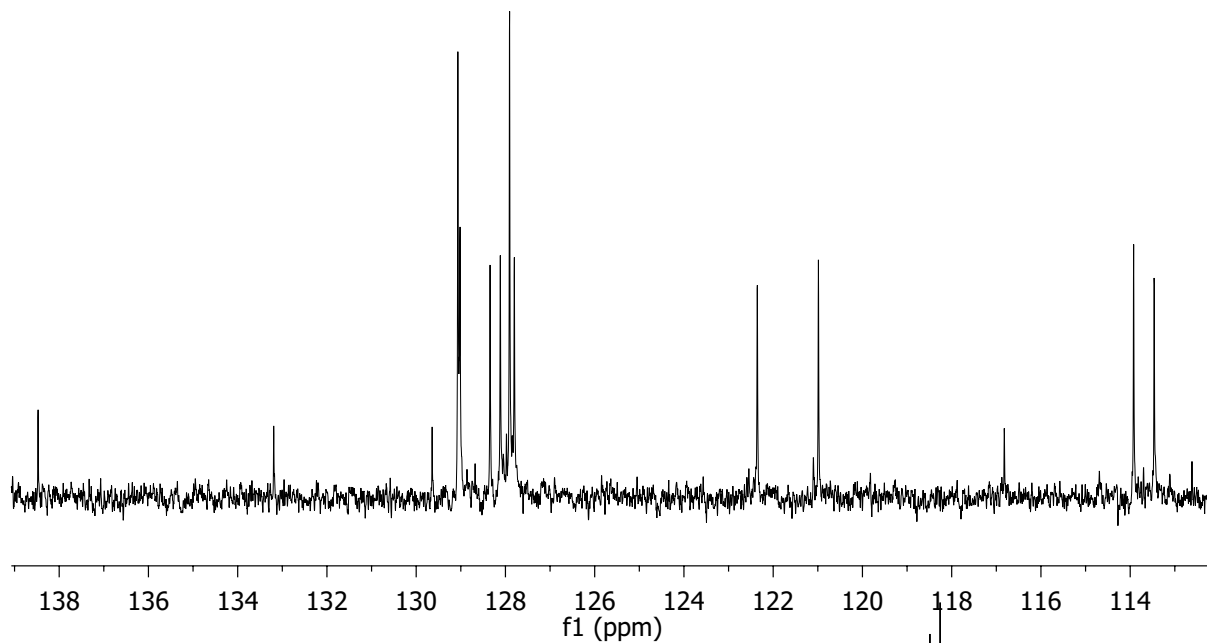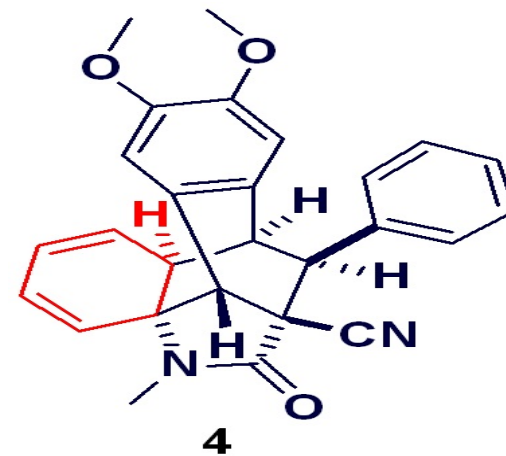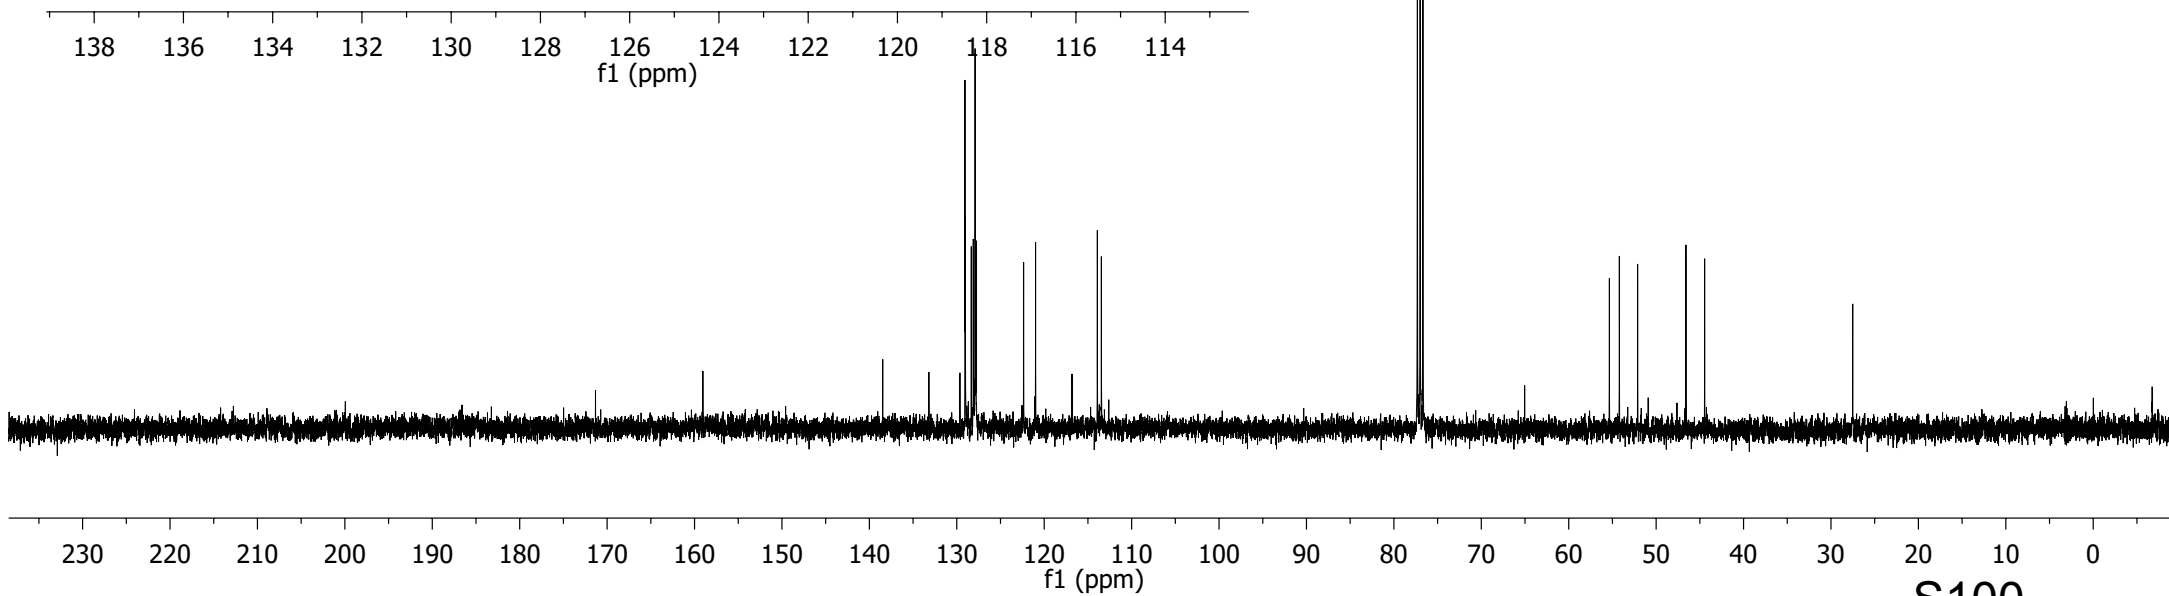

S100

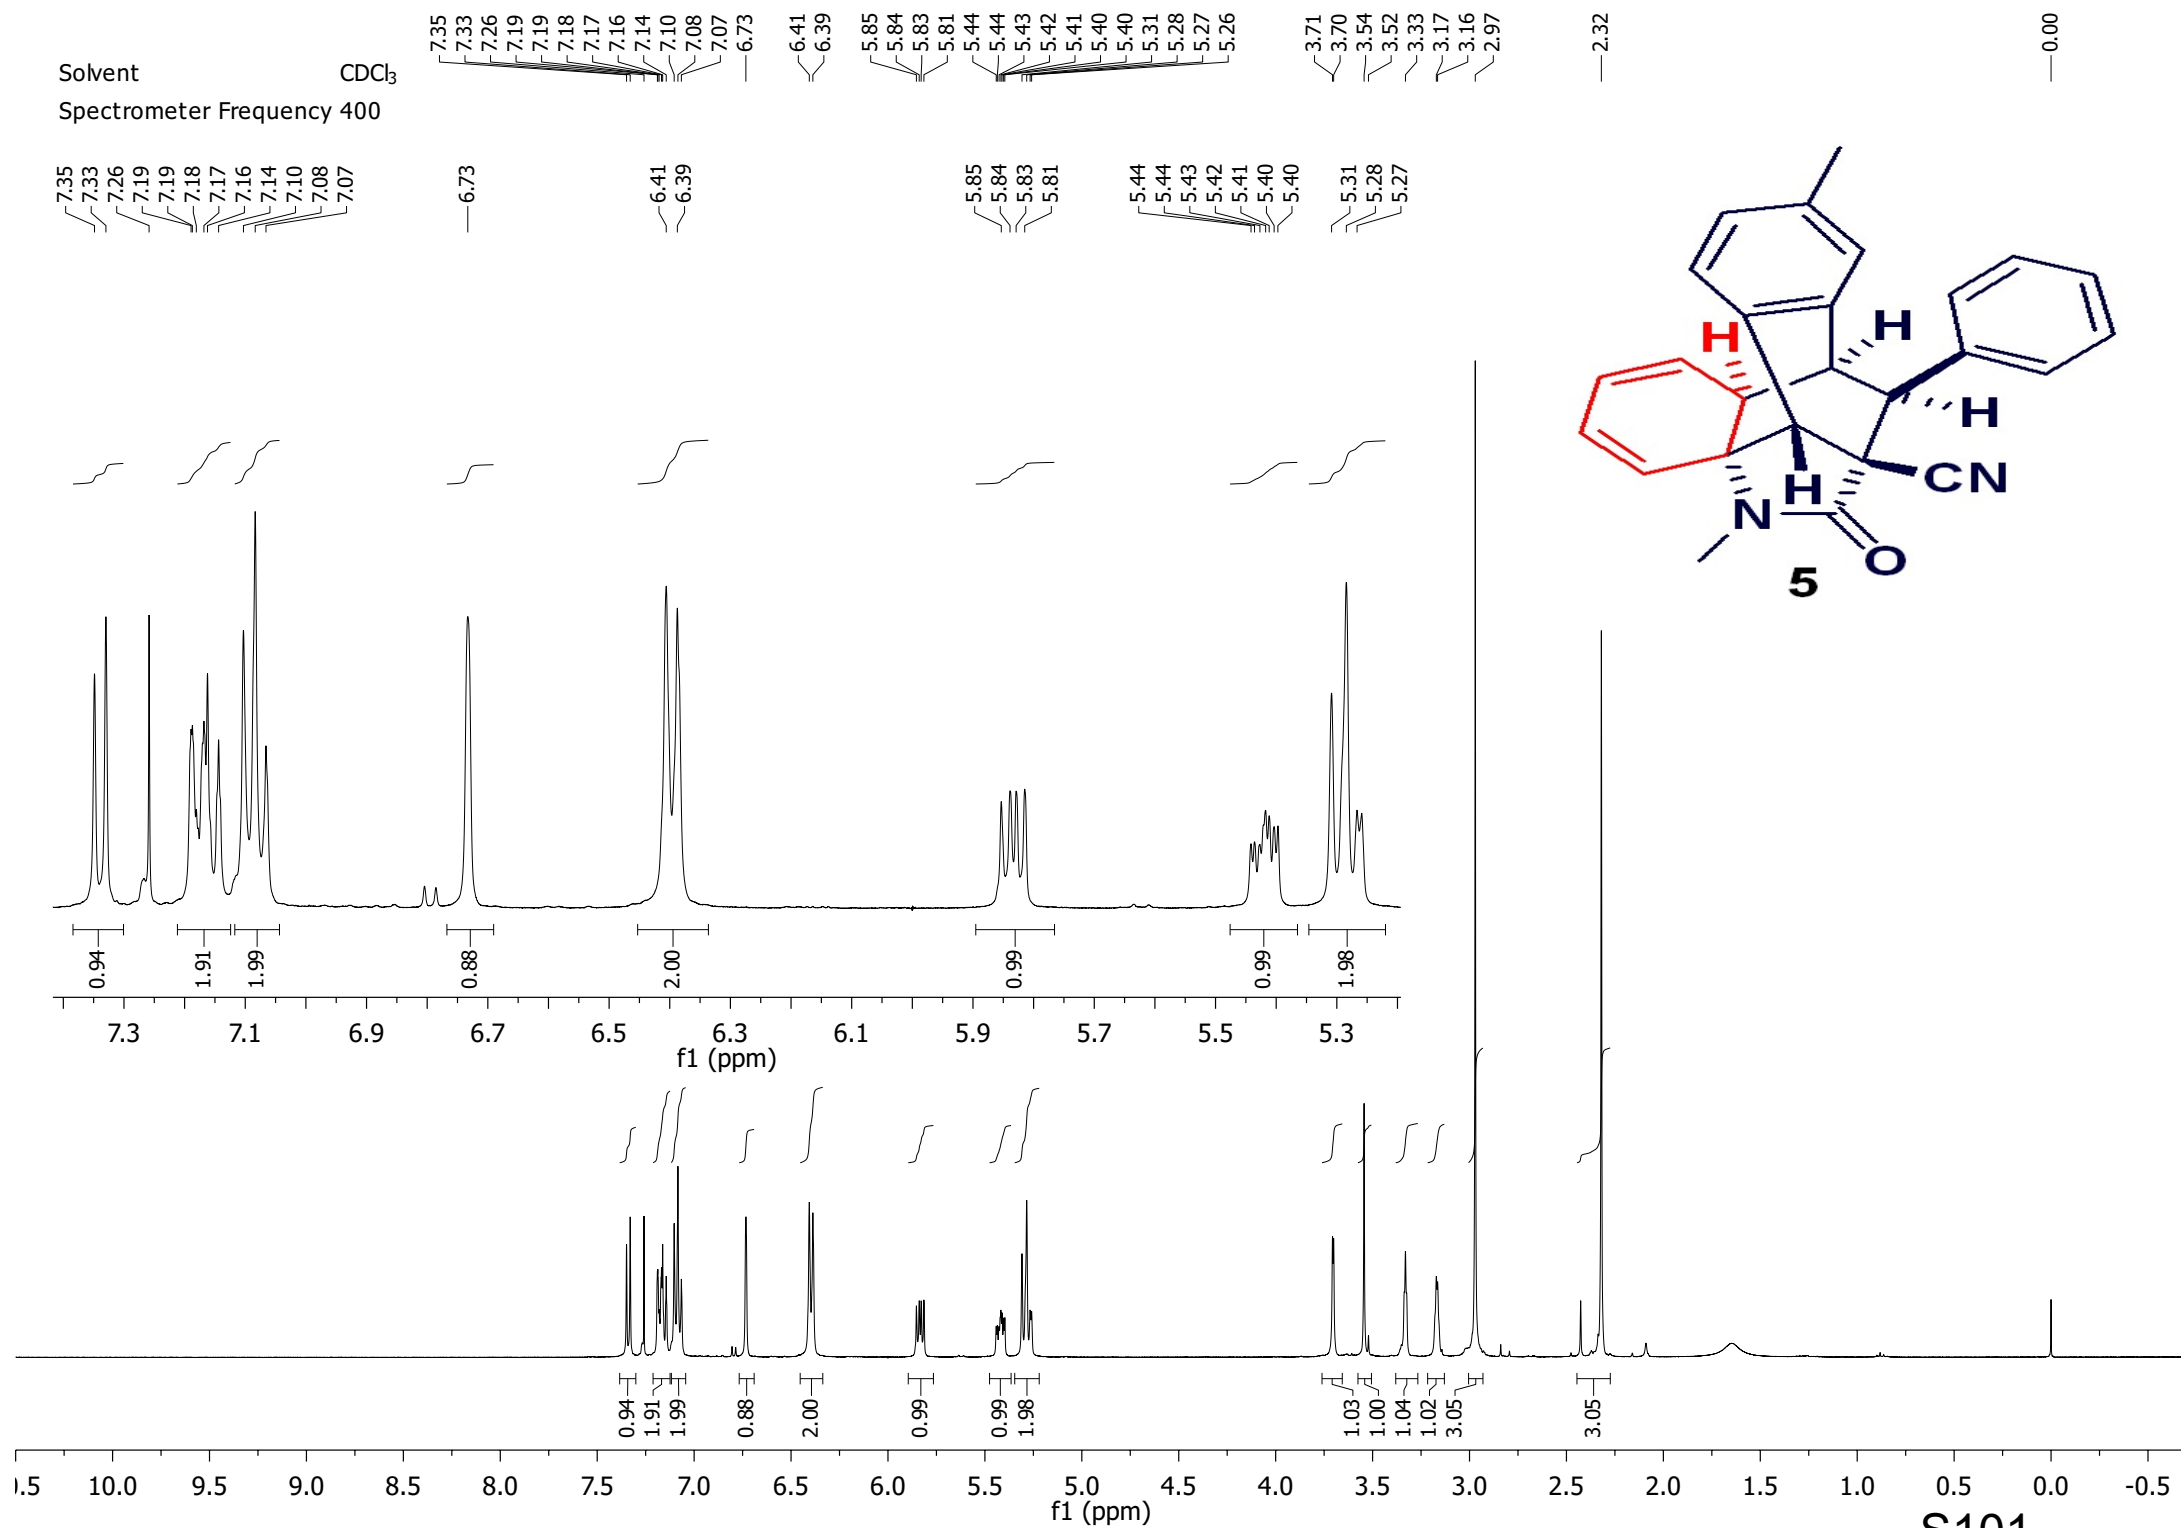

Solvent

CDCl<sub>3</sub>

Spectrometer Frequency 100

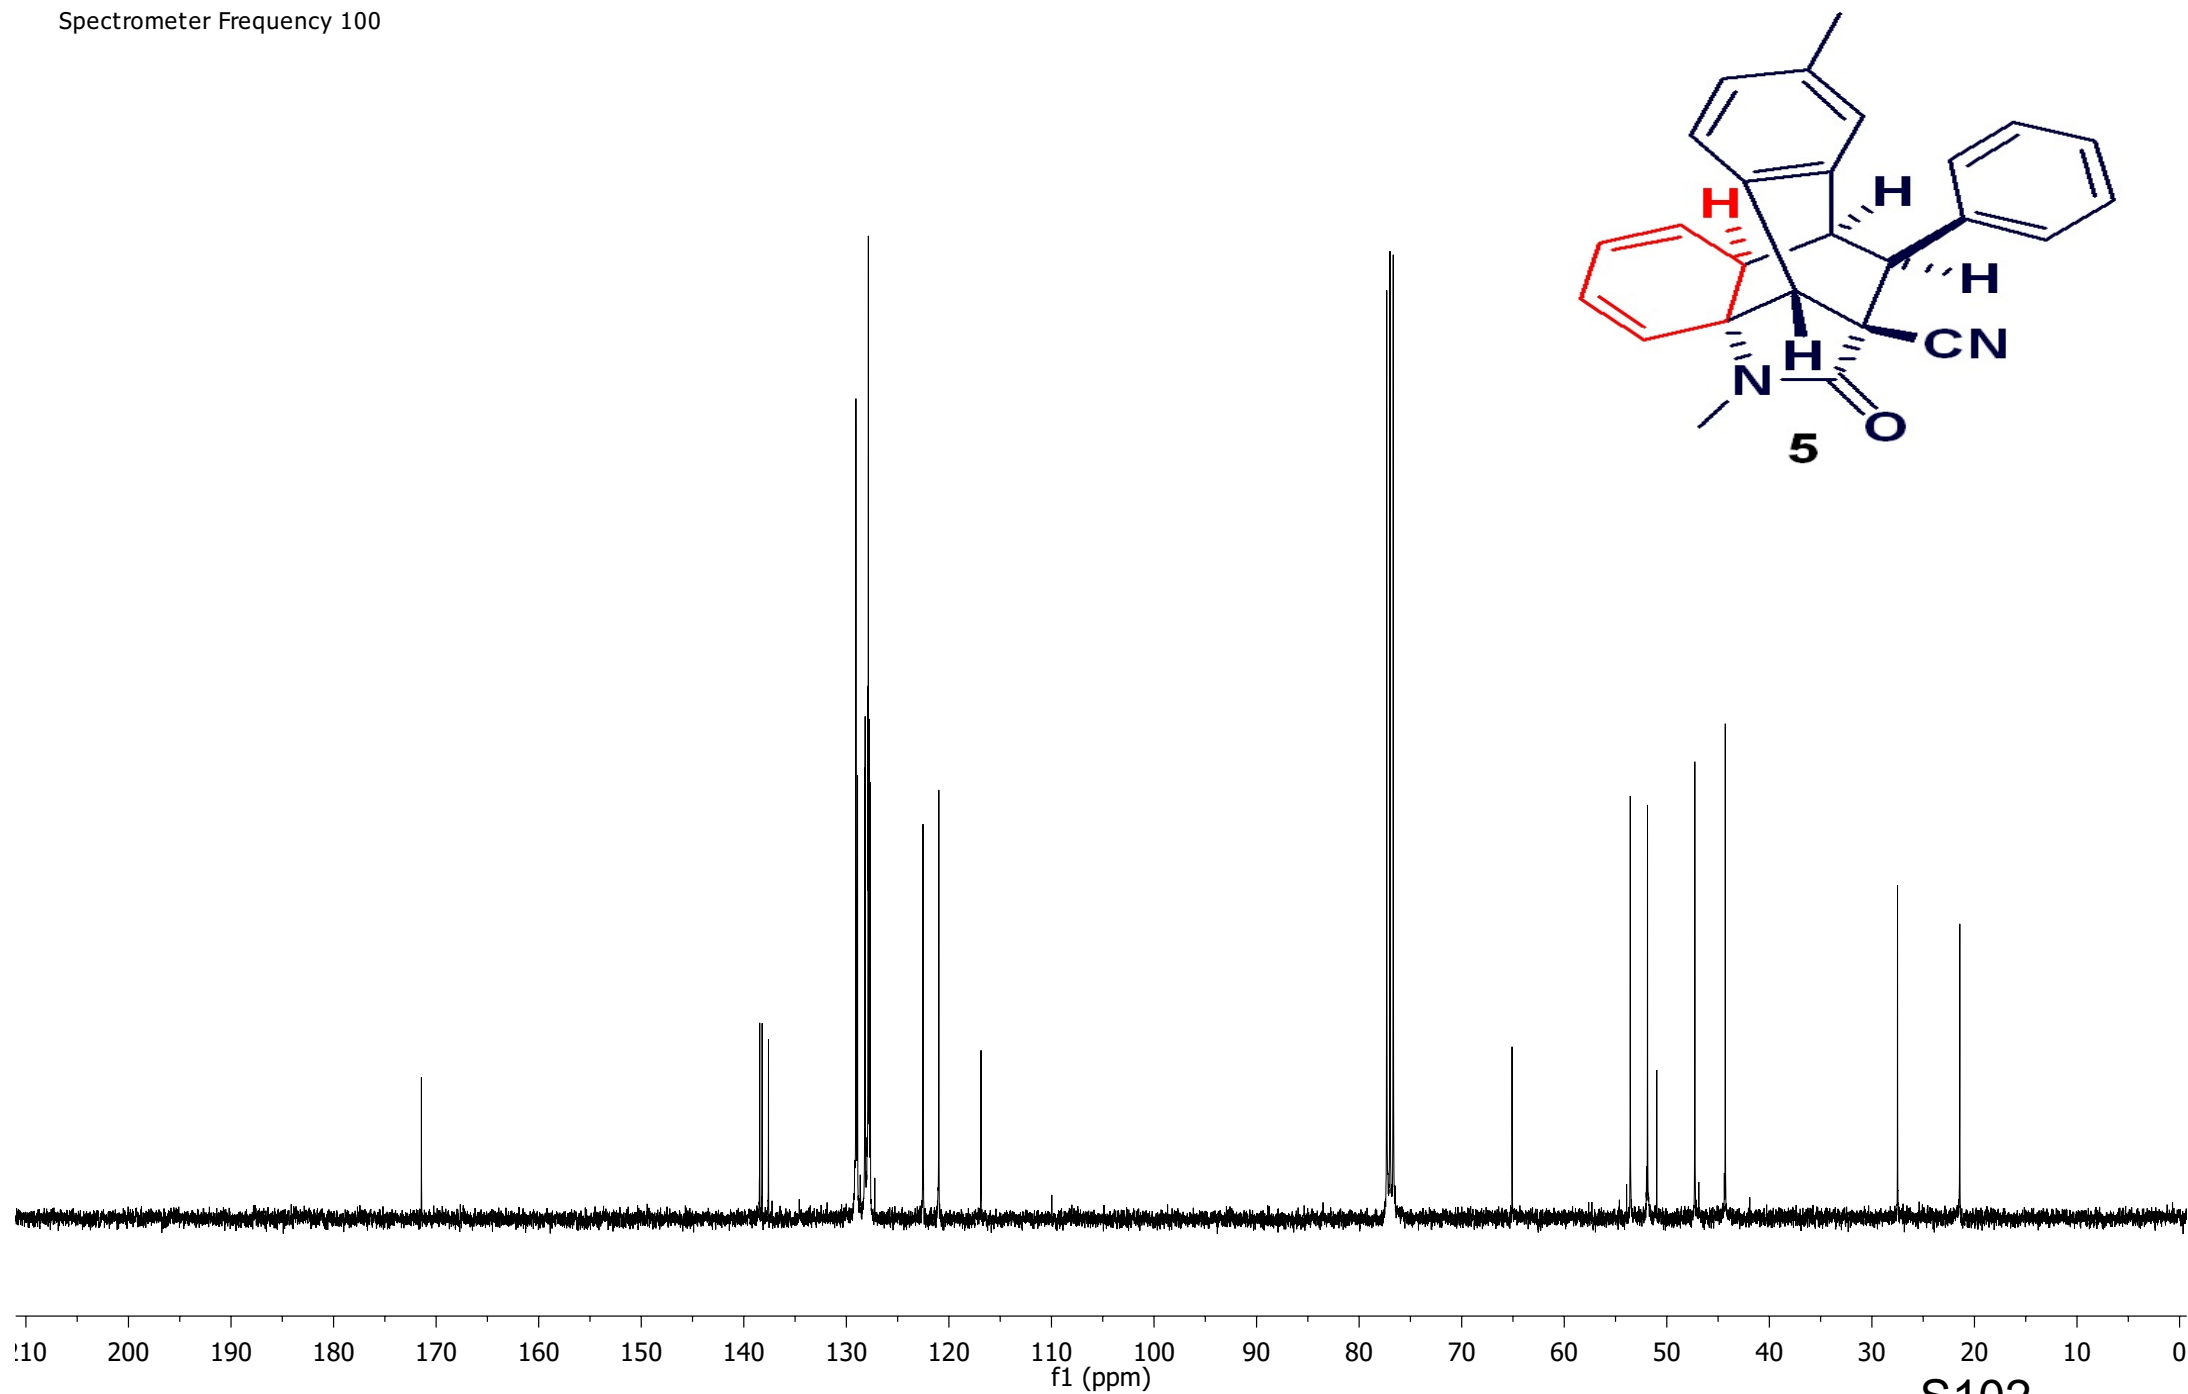

S102

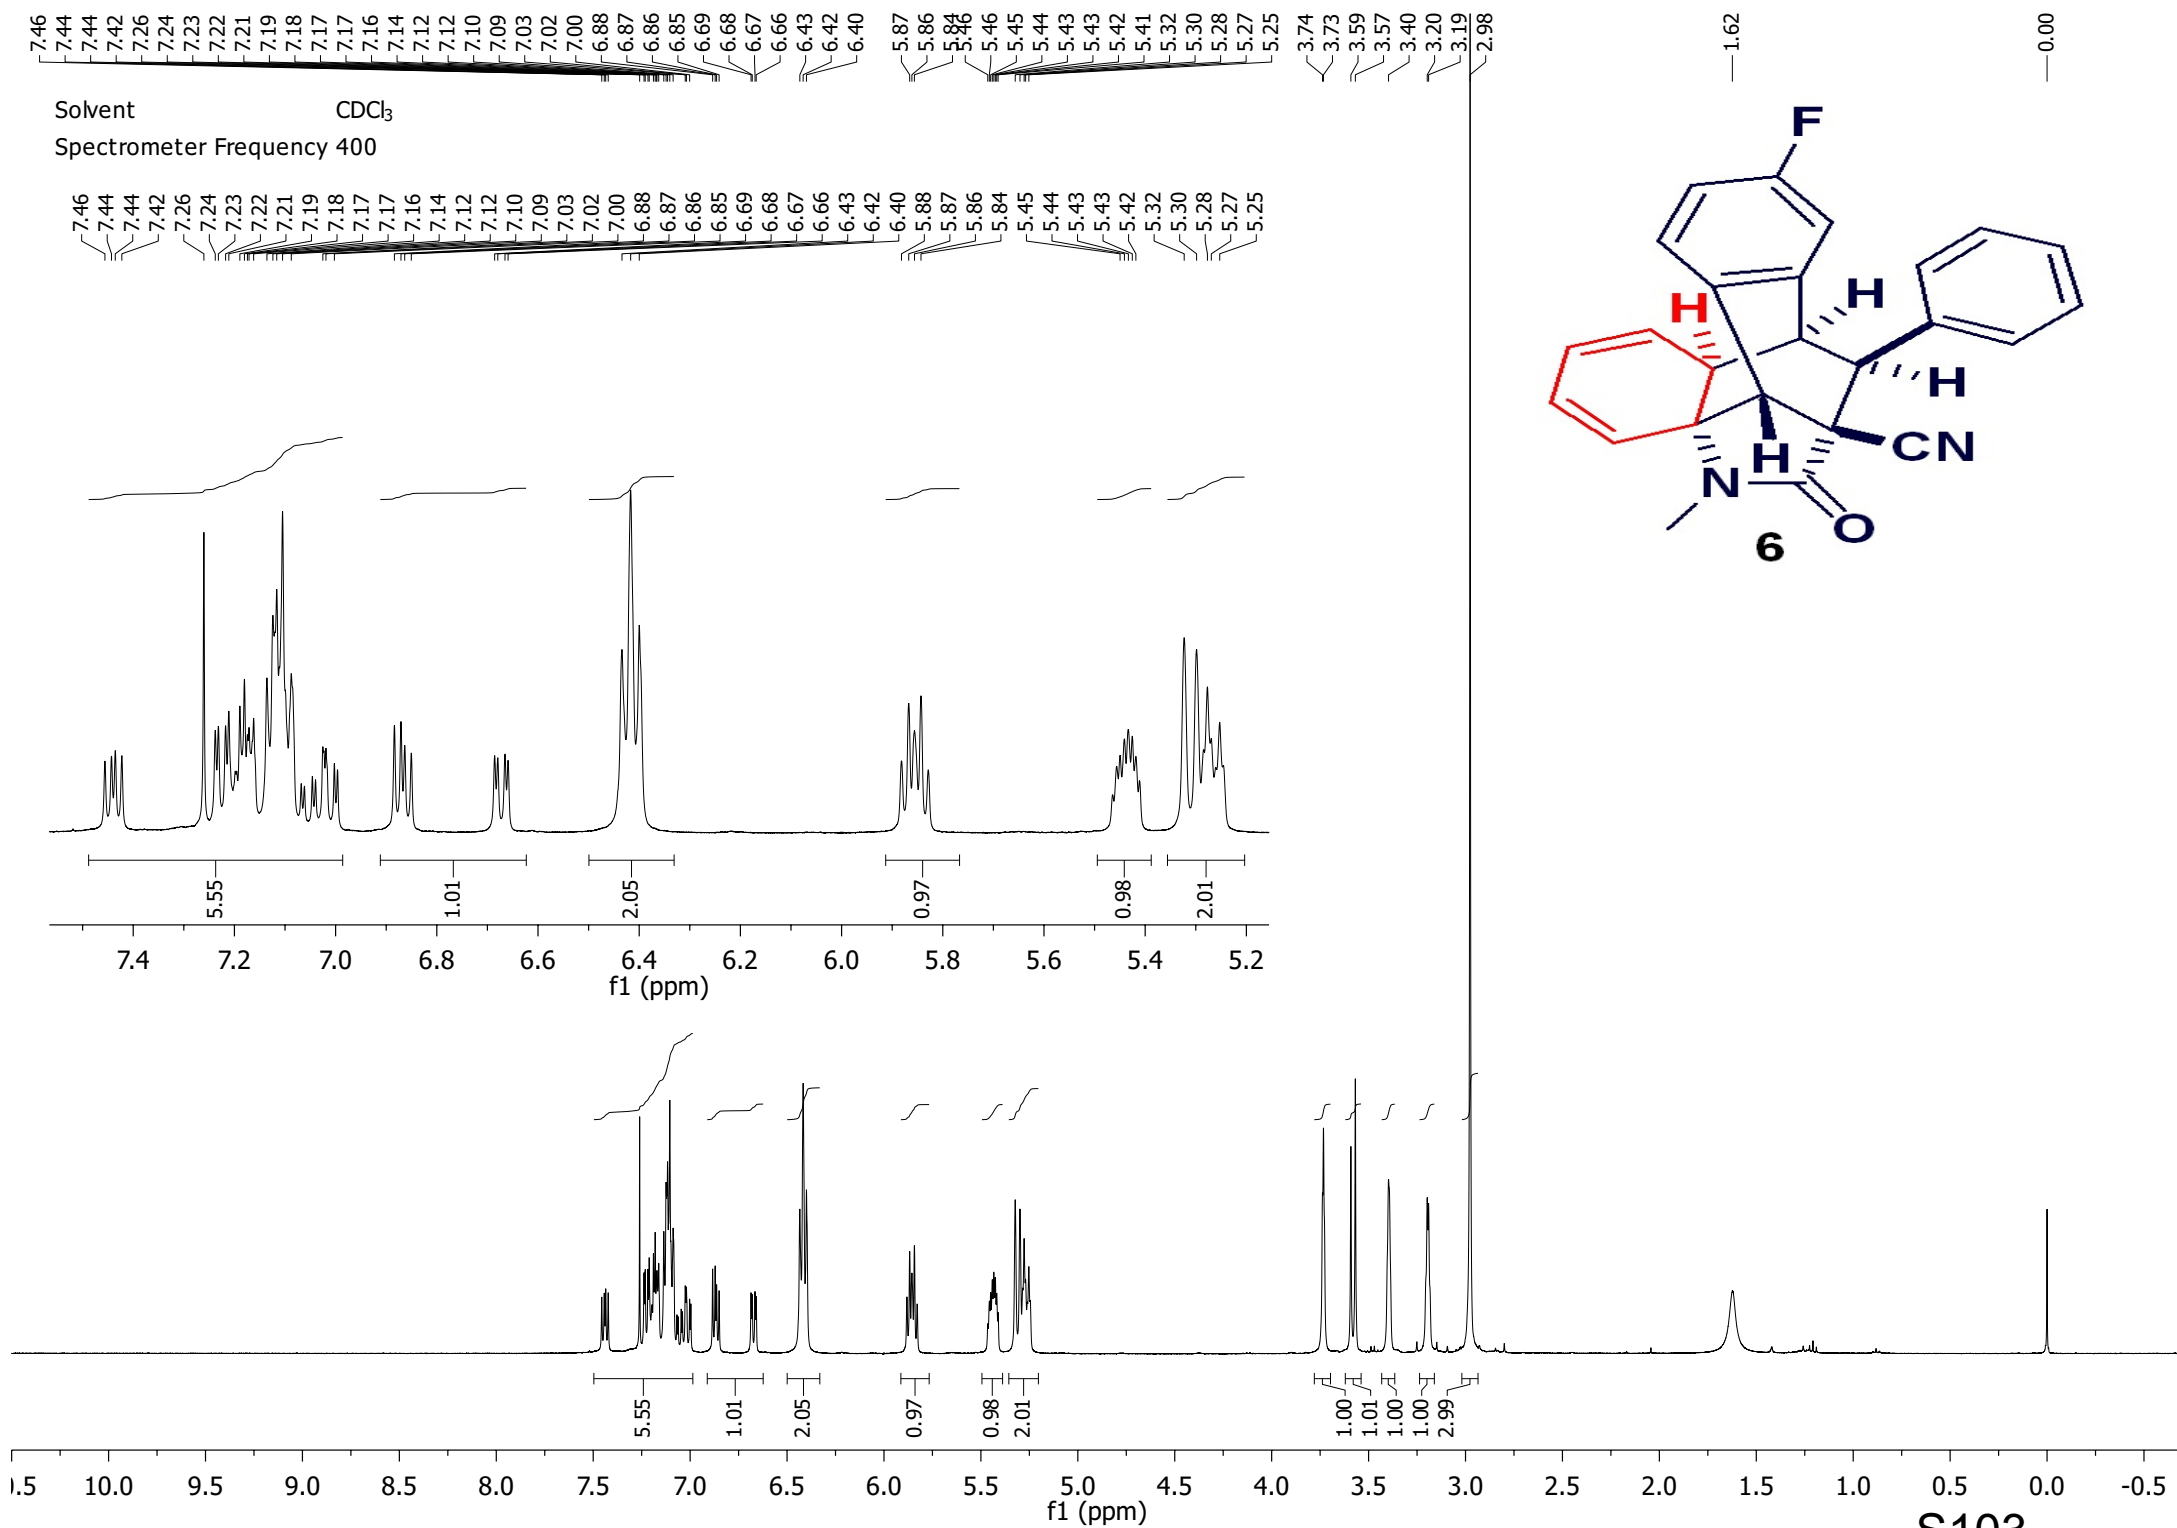

Solvent  $\text{CDCl}_3$   
Spectrometer Frequency 100

170.98  
163.22  
161.70  
160.77  
138.10  
137.98  
129.52  
129.44  
128.92  
128.87  
128.66  
128.38  
128.17  
128.10  
128.01  
127.95  
122.37  
122.22  
121.29  
121.17  
116.68  
116.57  
115.47  
115.45  
115.23  
115.05  
114.83  
114.61  
114.39  
77.31  
76.99  
76.67

64.84  
53.78  
53.16  
51.78  
51.45  
50.66  
47.52  
46.77  
44.25  
44.11  
27.55  
27.53

170.98  
163.22  
161.70  
160.77

140.16  
138.10  
137.98  
134.04  
133.96  
133.56  
128.92  
128.87  
128.17  
128.10  
128.01  
127.95  
122.37  
122.22  
121.29  
121.17  
115.47  
115.45  
115.23  
114.61  
114.39

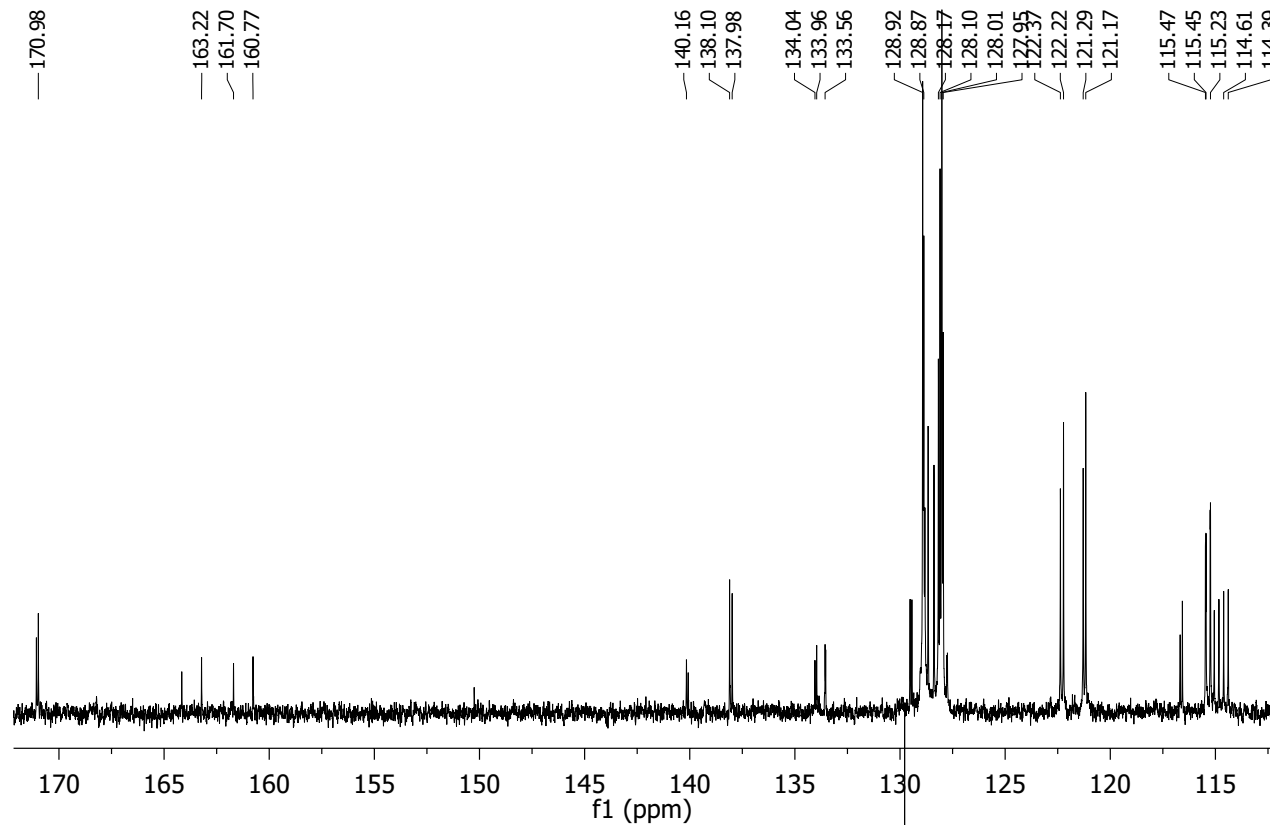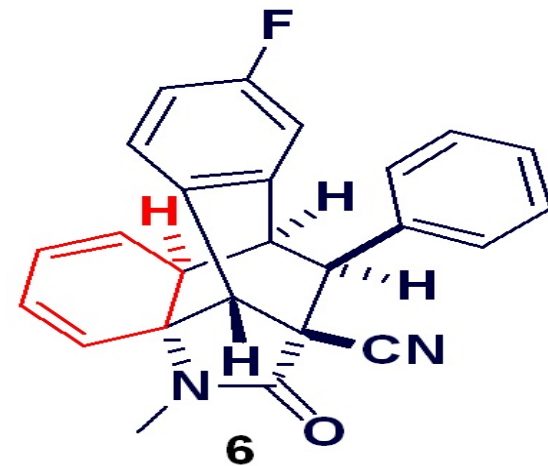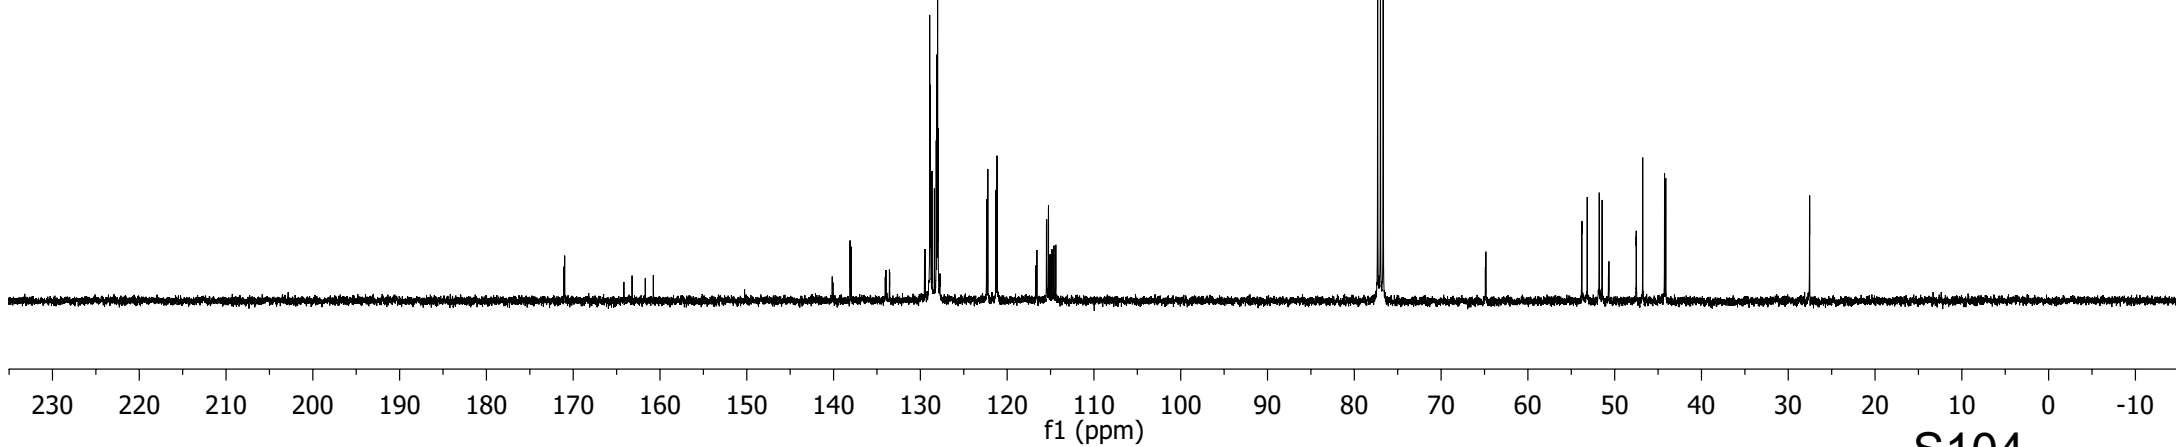

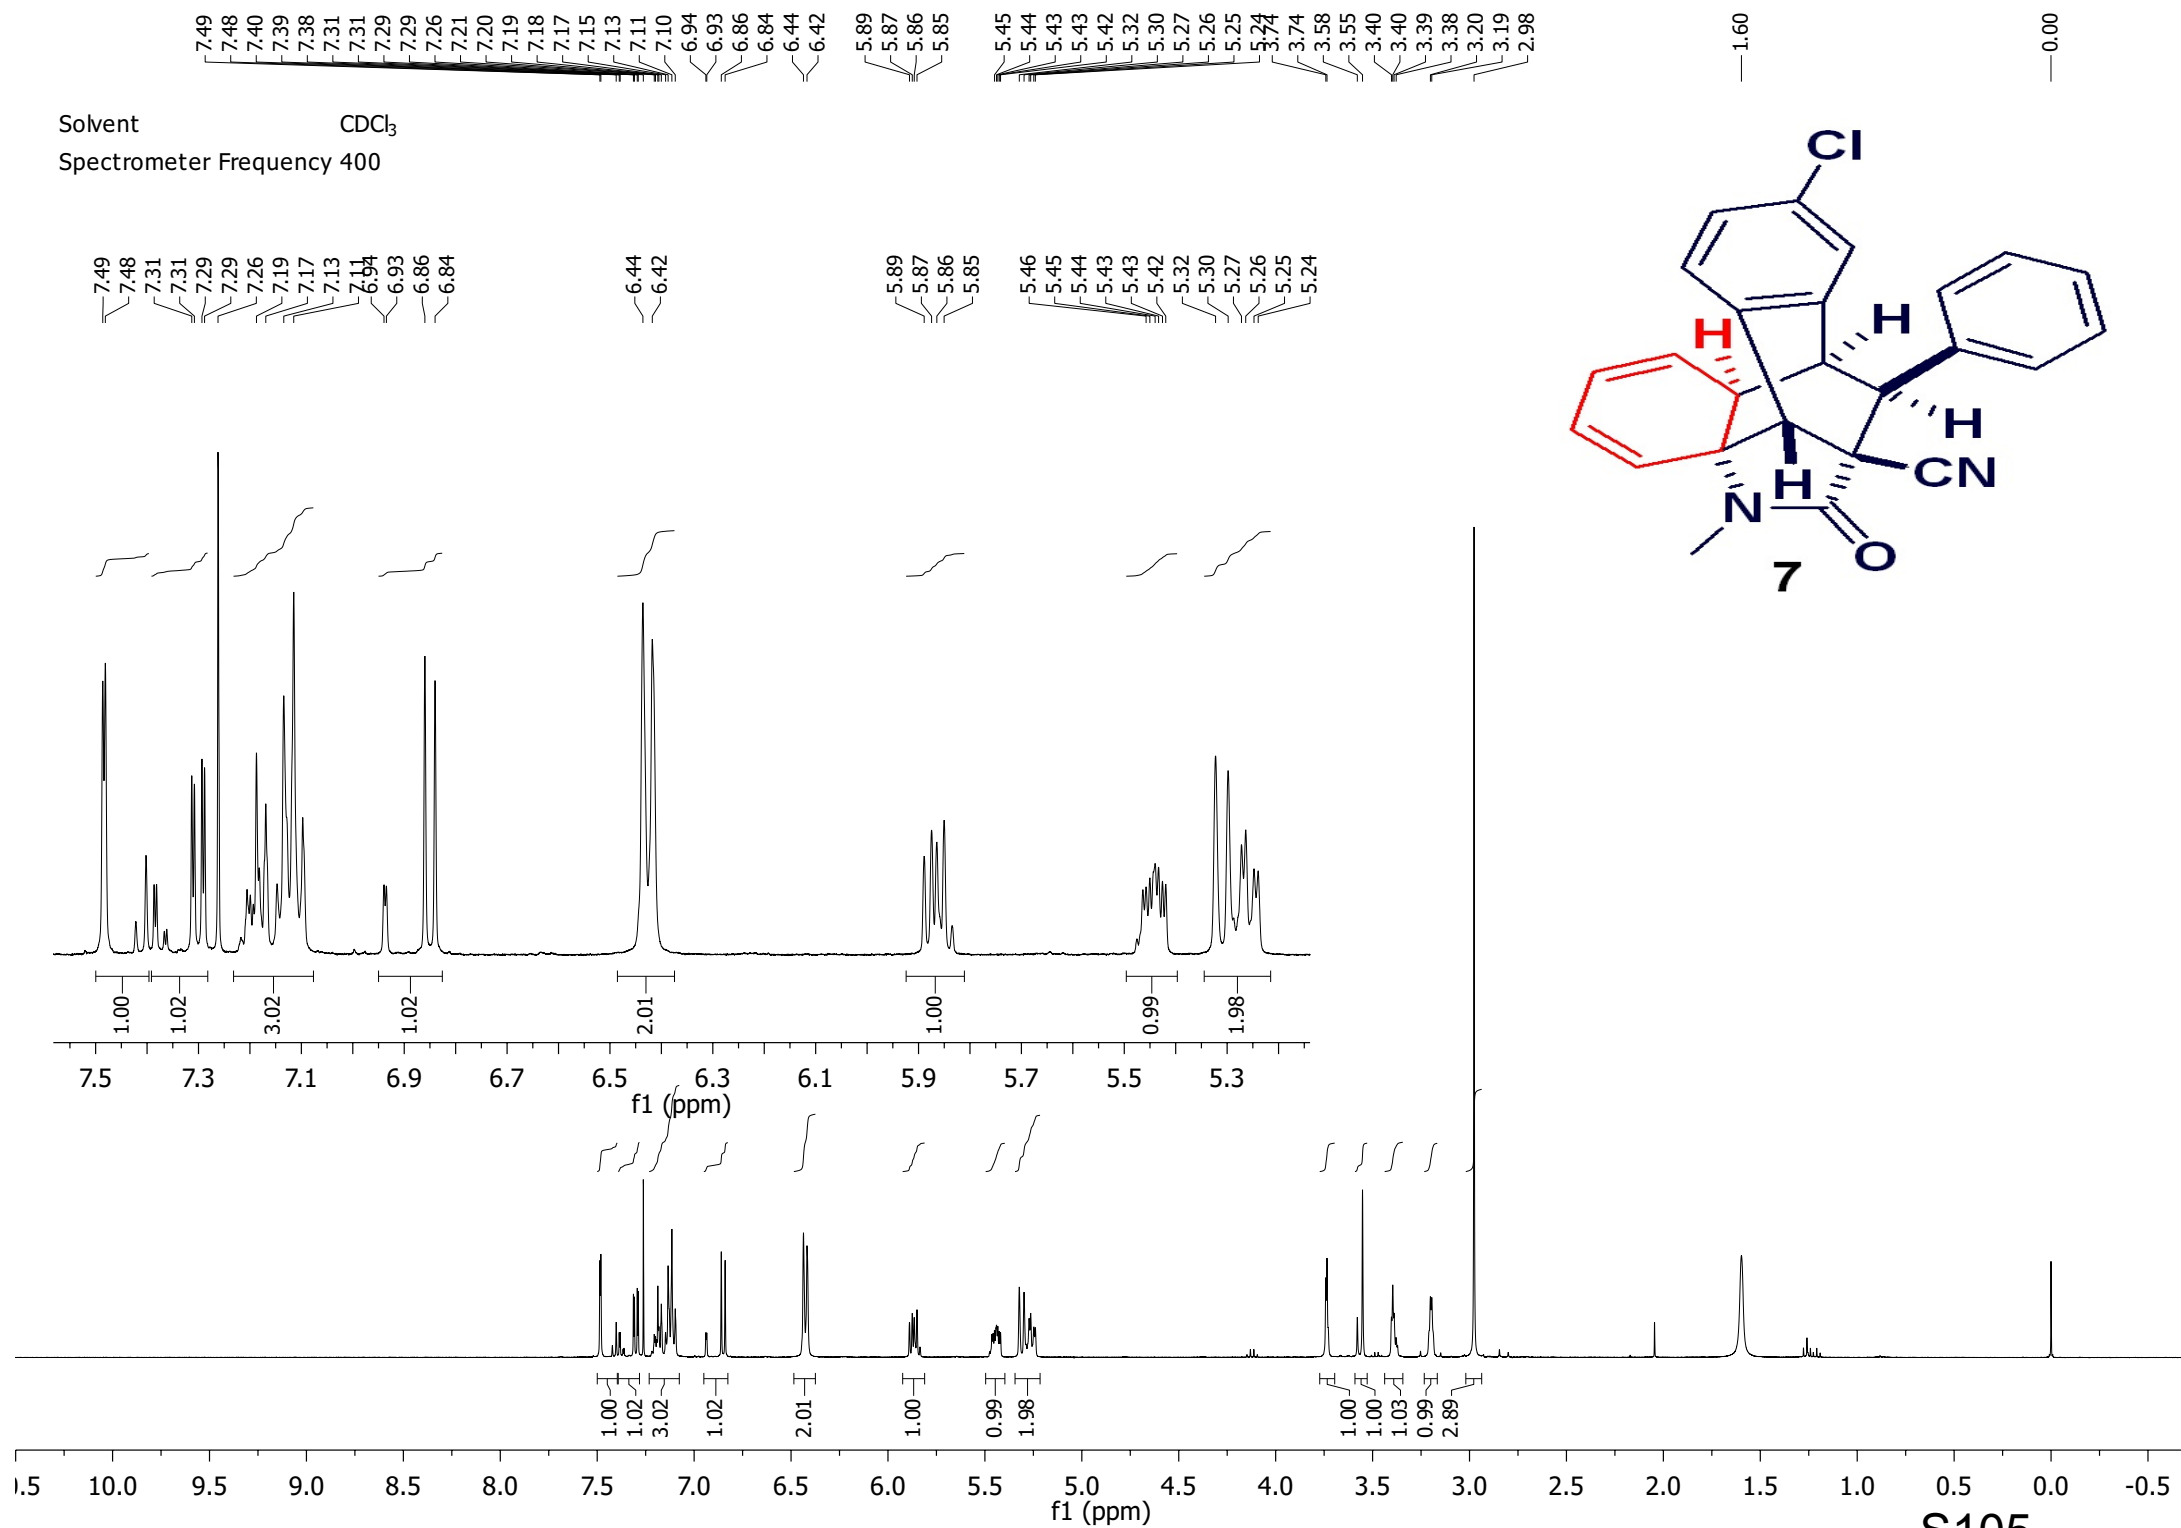

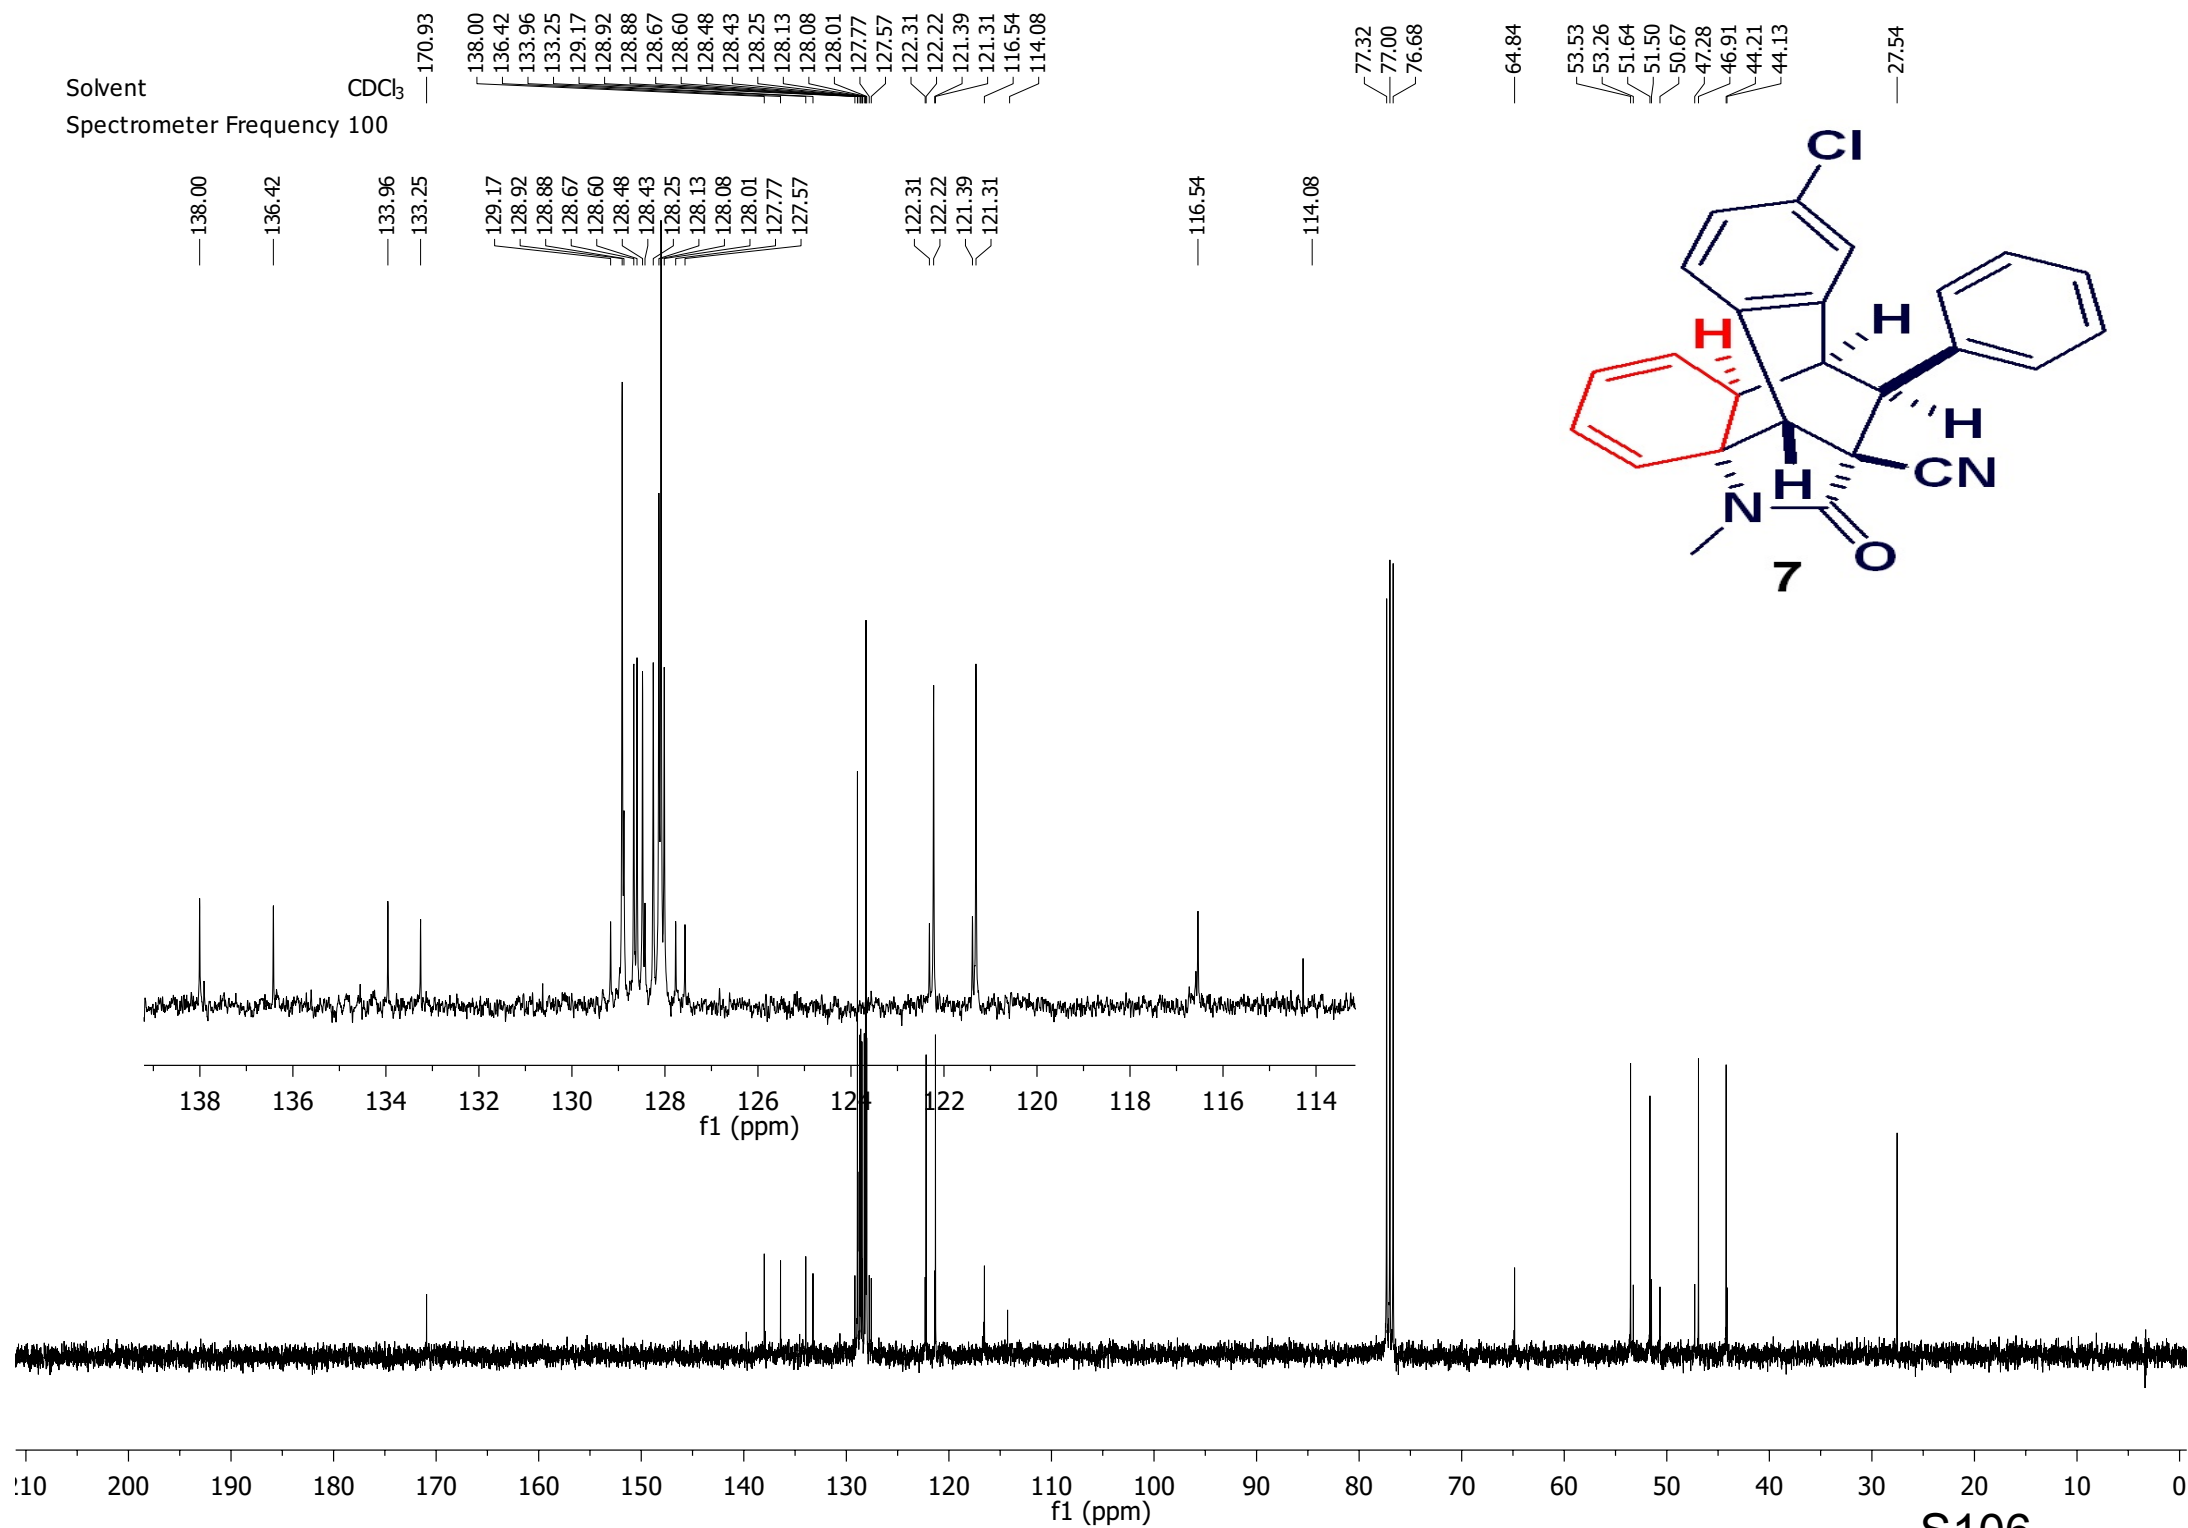

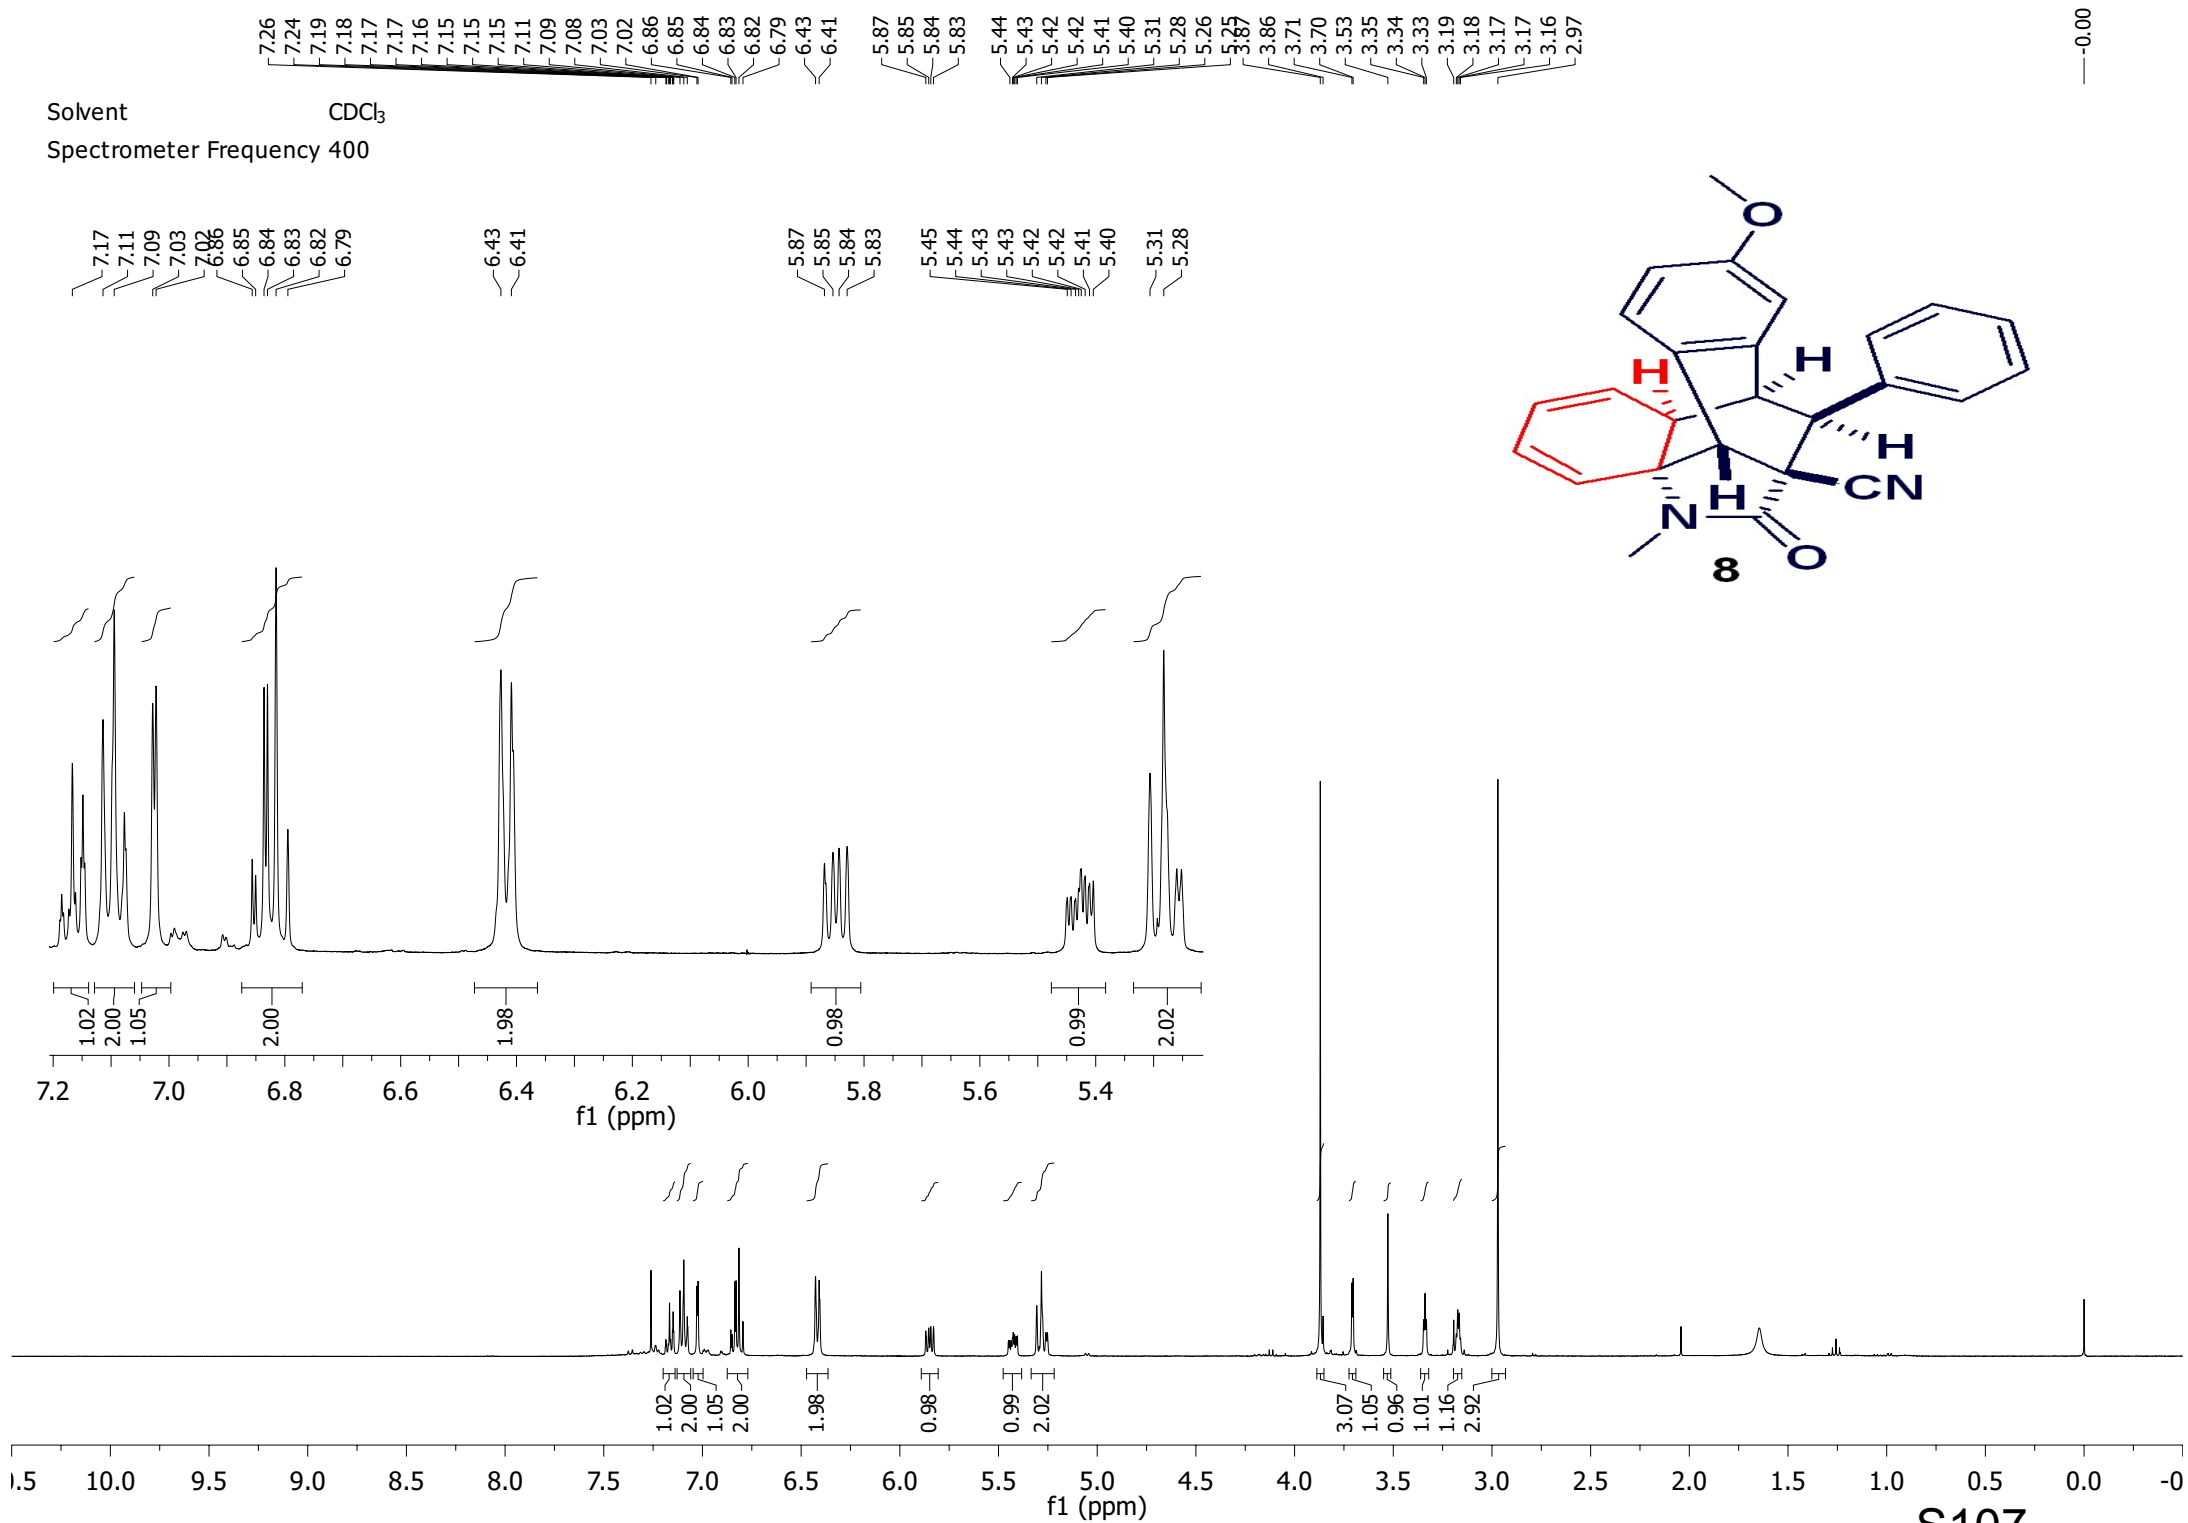

Solvent  $\text{CDCl}_3$   
 Spectrometer Frequency 100

138.47 133.18 130.00 129.63 129.05 128.99 128.87 128.69 128.32 128.09 127.88 127.77 125.15 122.32 120.96 116.81 113.90 113.45 171.32 159.03 138.47 133.18 130.00 129.63 129.05 128.99 128.87 128.69 128.32 128.09 127.77 125.15 122.32 120.96 116.81 113.90 113.45 77.31 76.99 76.67 65.04 55.33 54.18 52.09 50.90 46.57 44.43 35.97 27.48

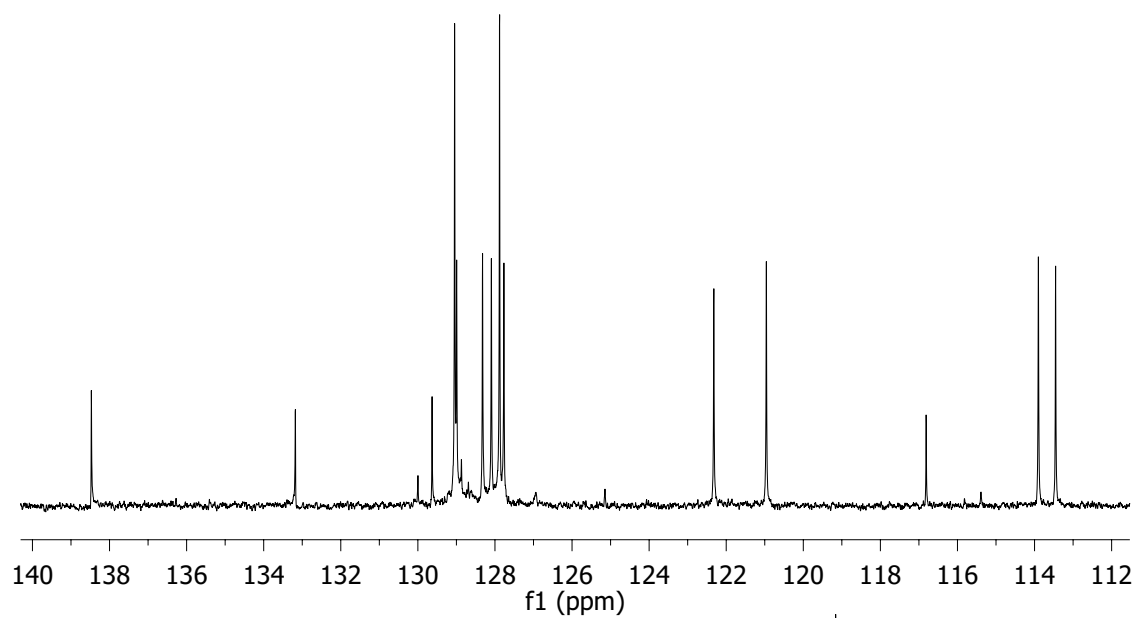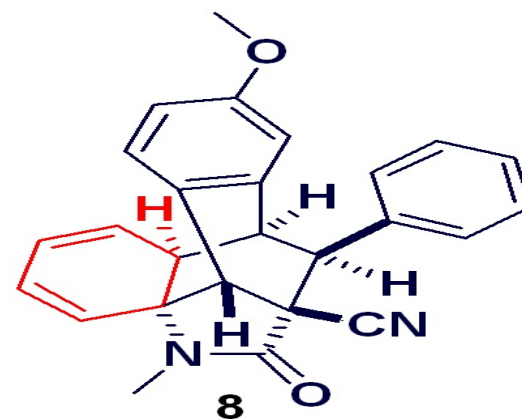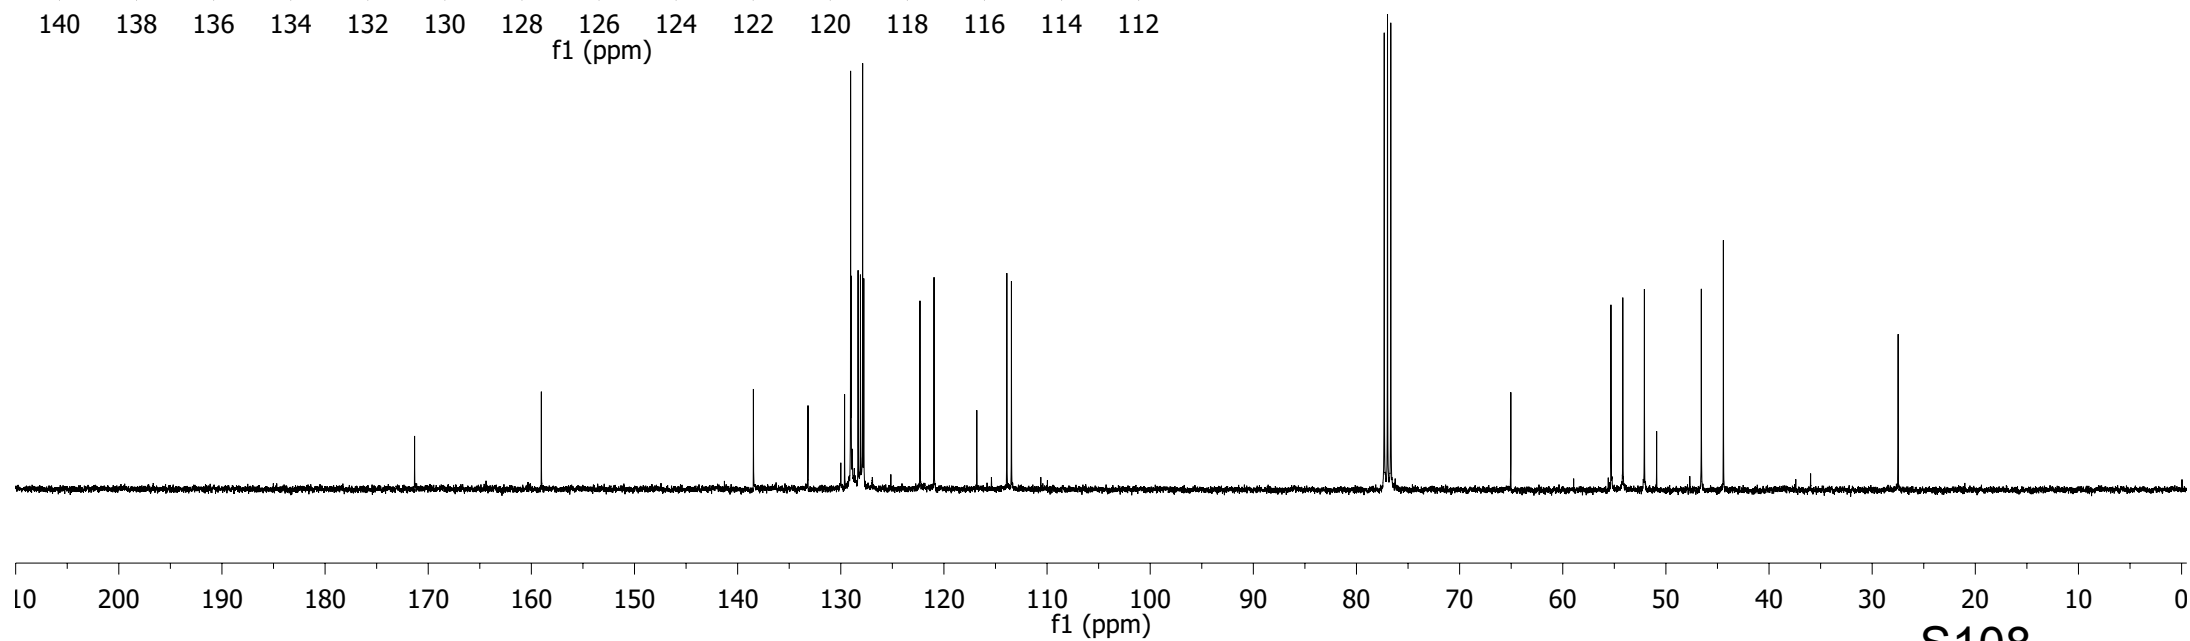

S108

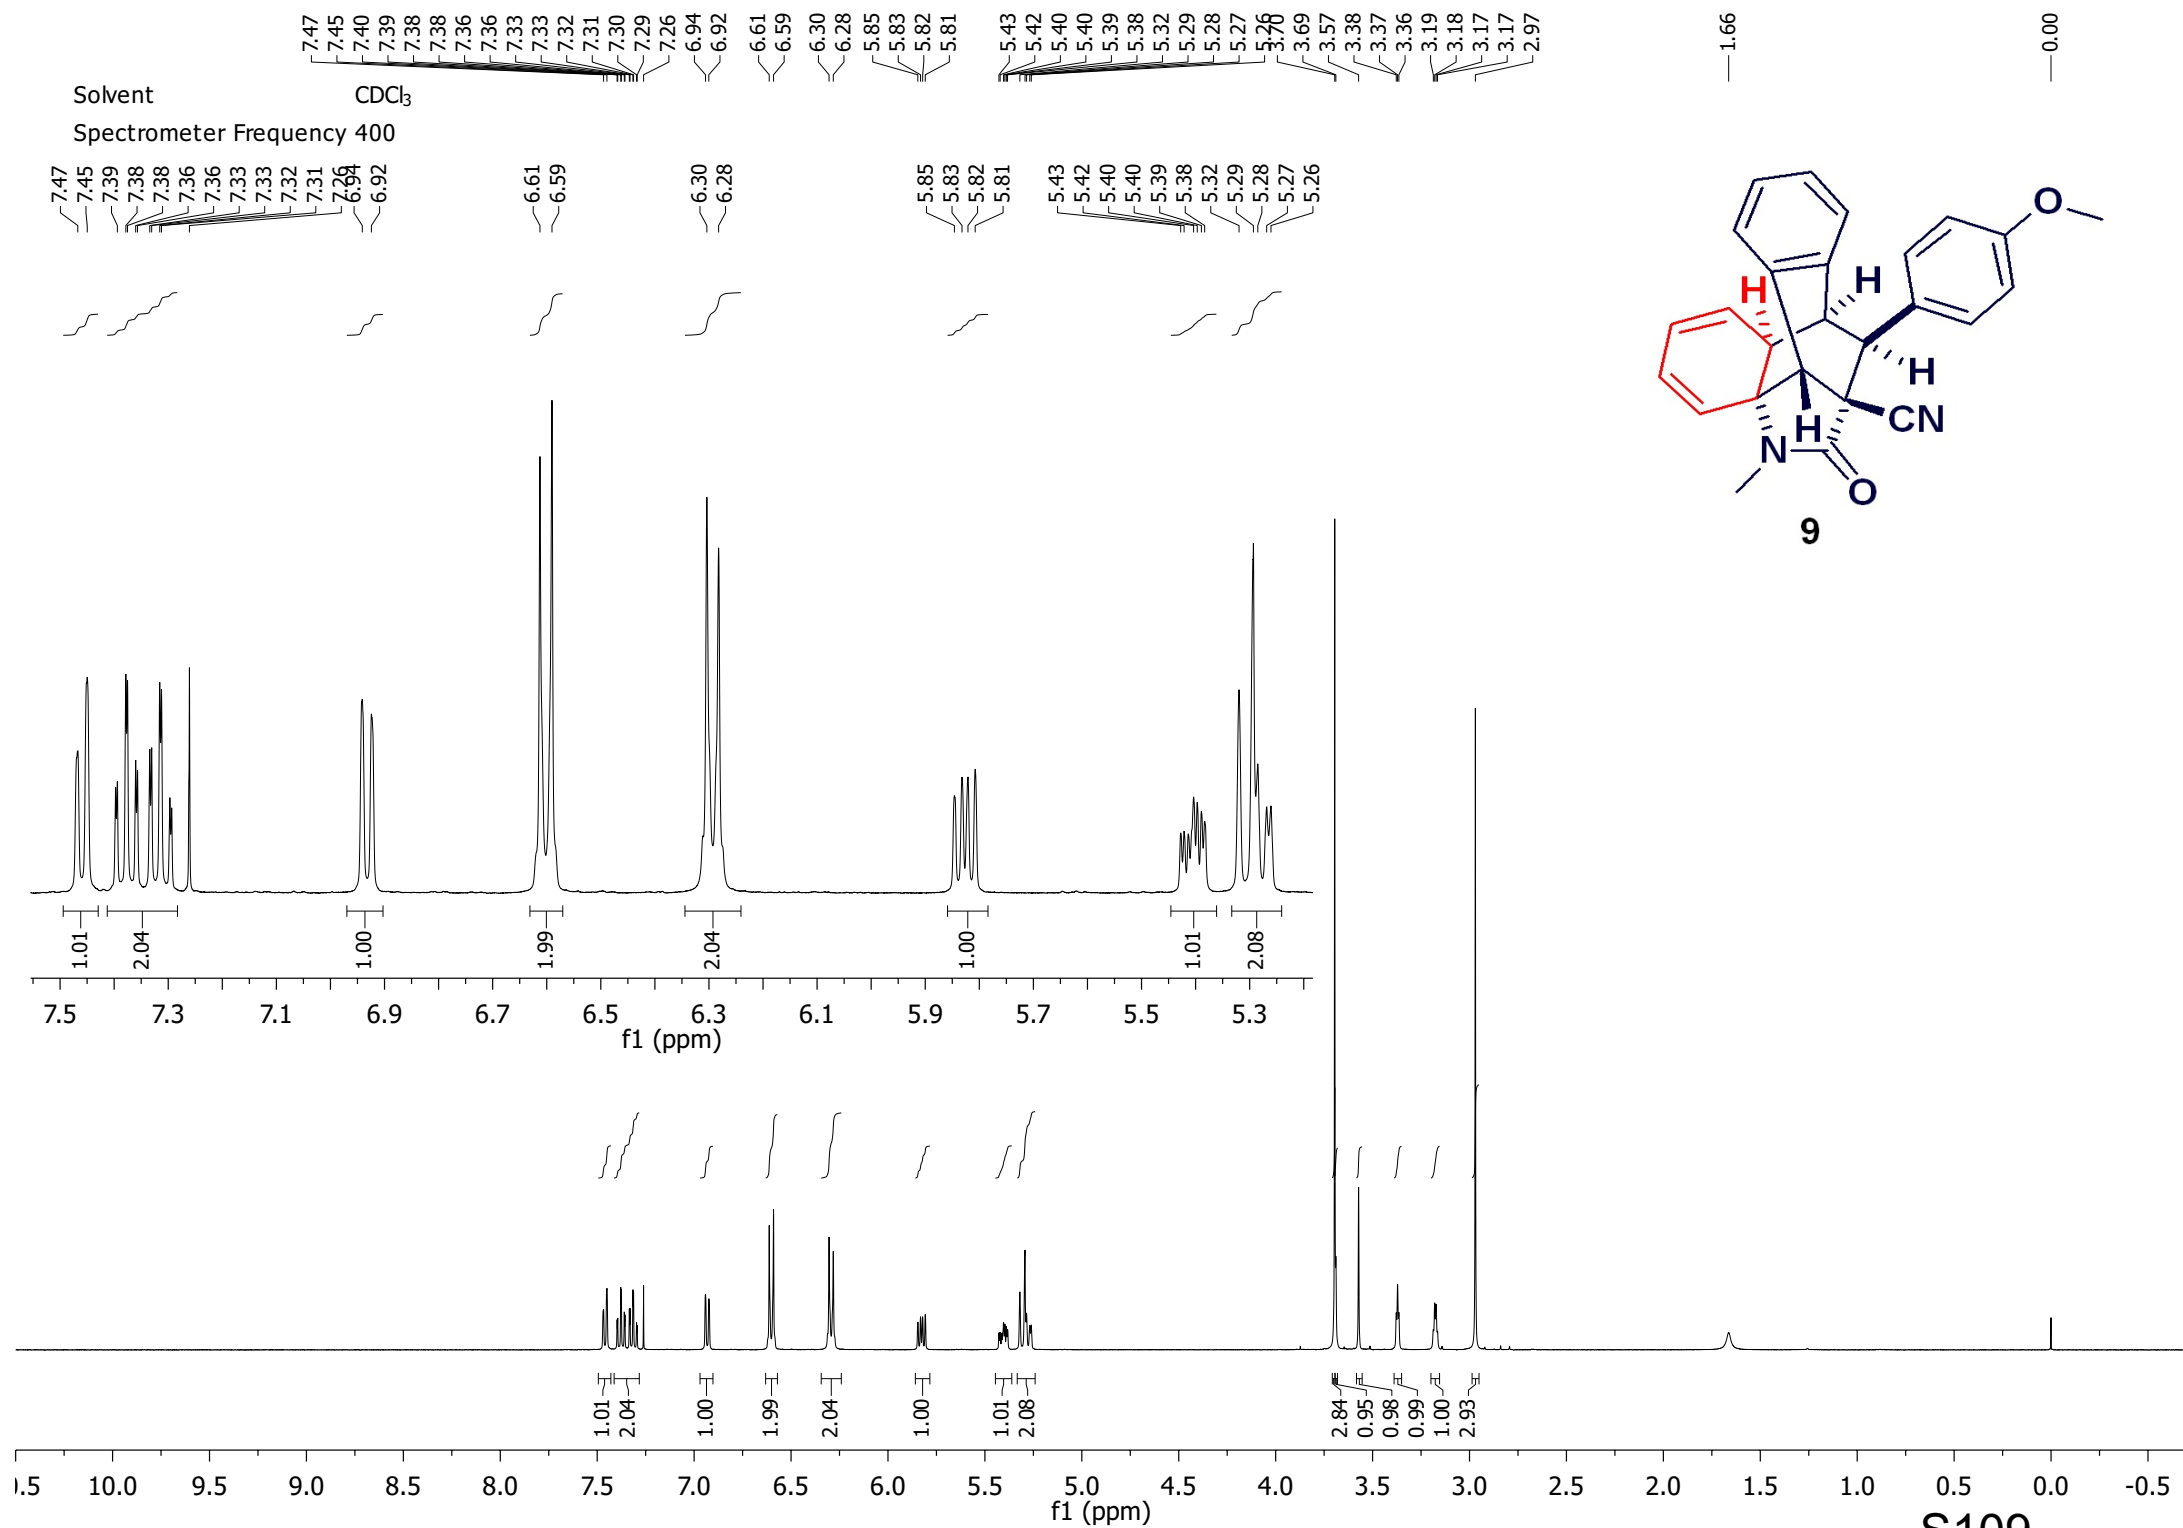

Solvent  $\text{CDCl}_3$   
Spectrometer Frequency 100

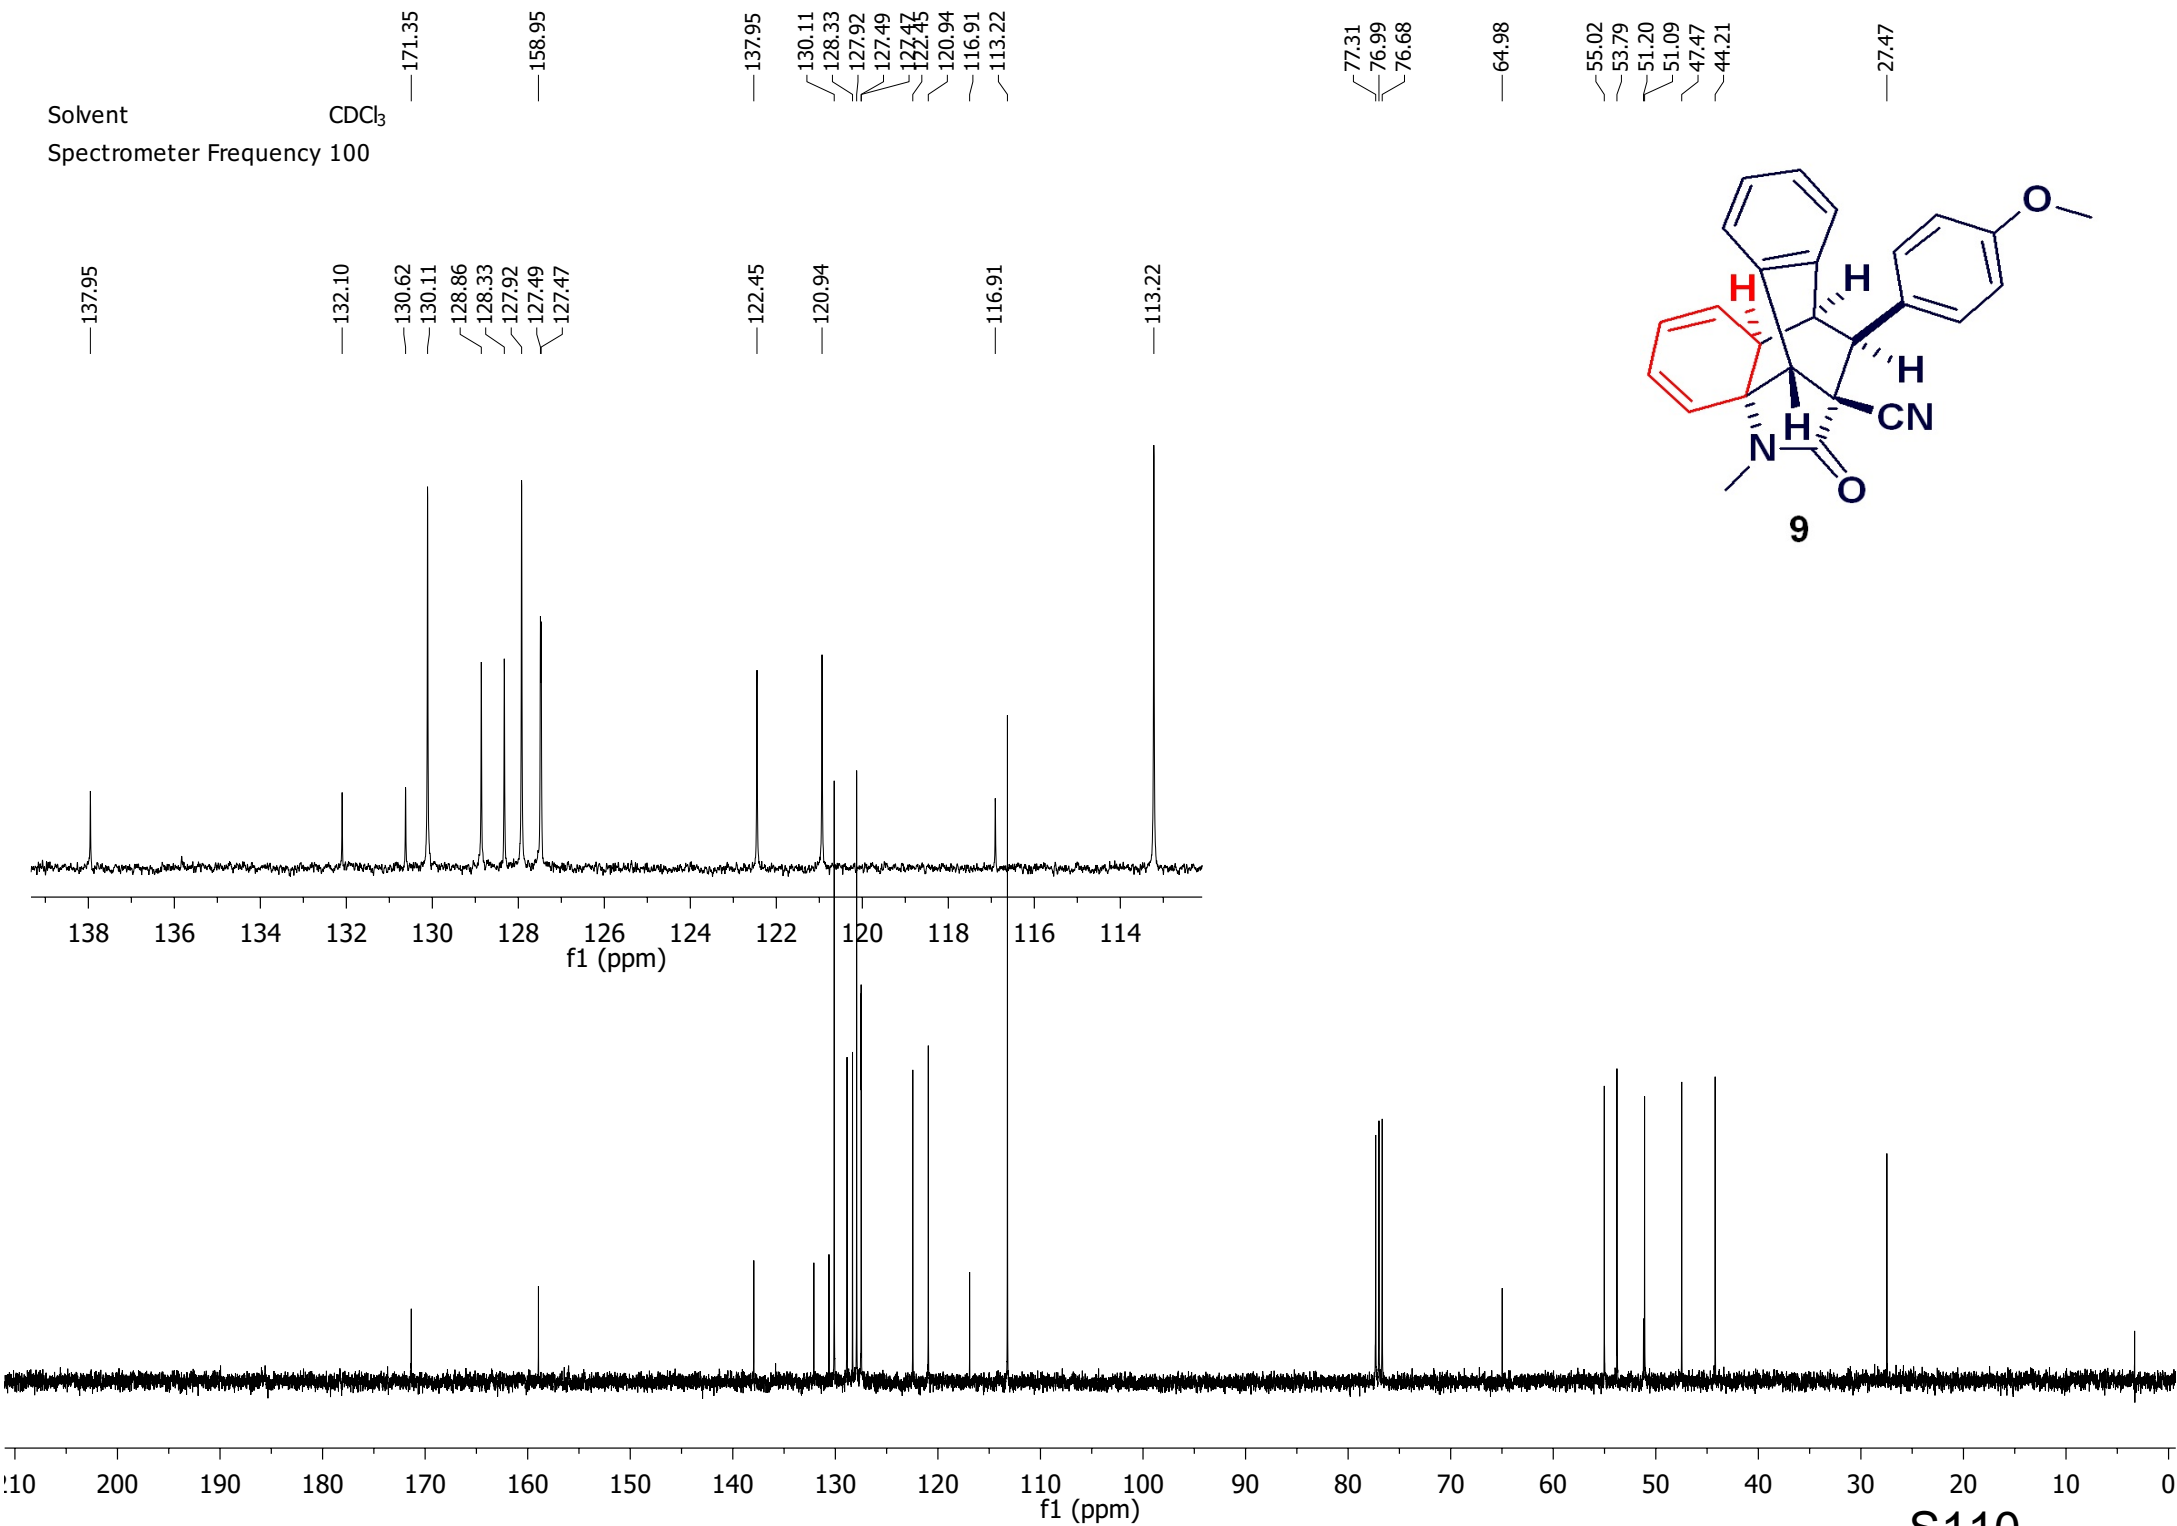

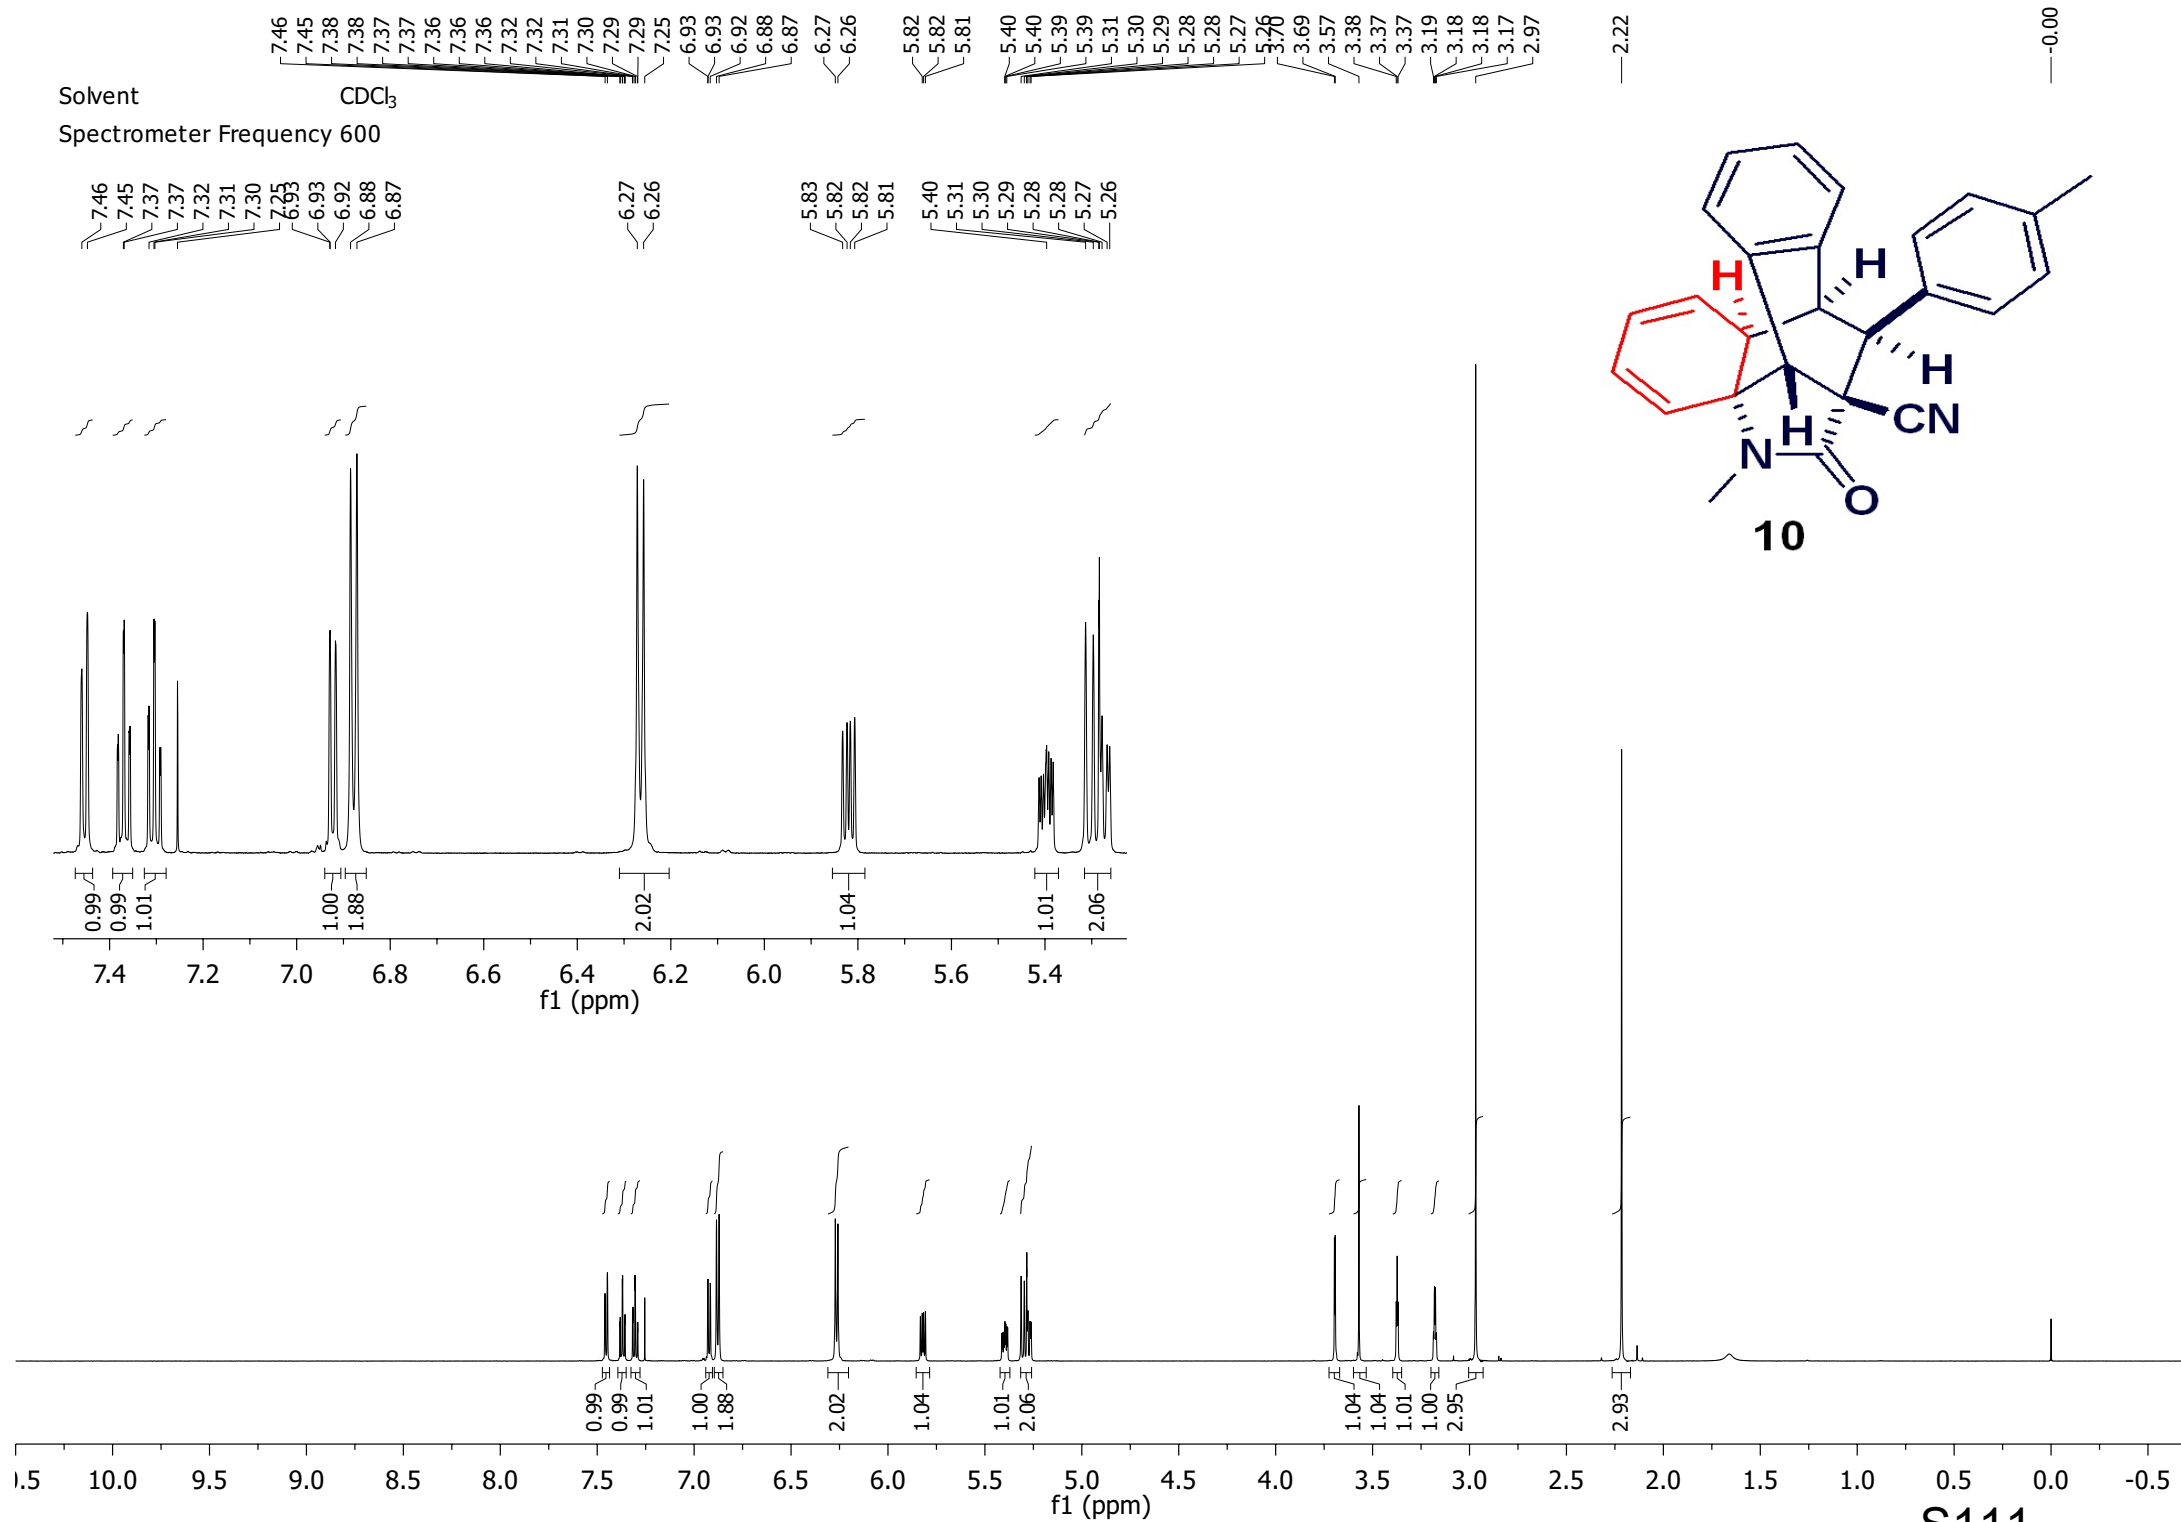

Solvent

$\text{CDCl}_3$

Spectrometer Frequency 150

171.36

137.96  
137.42  
135.43  
132.11  
128.87  
128.85  
128.59  
128.29  
127.91  
127.46  
127.45  
122.48  
120.94  
116.88

77.21  
76.99  
76.78

65.00

53.82  
51.50  
51.05  
47.36  
44.24

27.46

20.95

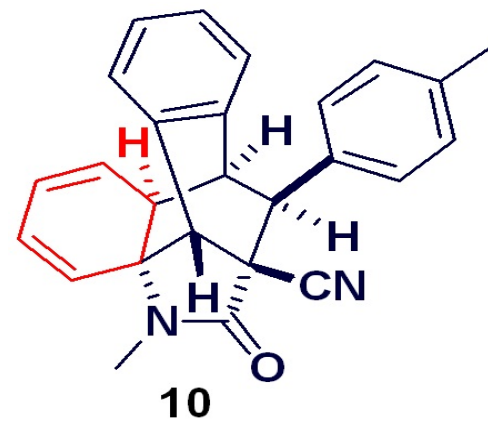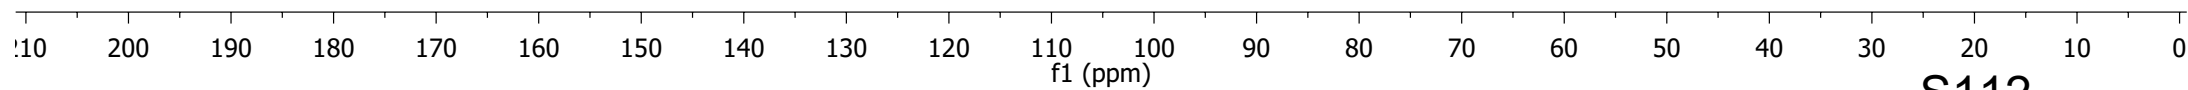

S112

Solvent  $\text{CDCl}_3$   
Spectrometer Frequency 400

7.48 7.46 7.41 7.41 7.39 7.37 7.37 7.34 7.34 7.32 7.32 7.30 7.30 7.26 7.06 7.04 6.91 6.90 6.31 6.28 5.86 5.84 5.83 5.82 5.43 5.43 5.42 5.41 5.40 5.40 5.33 5.30 5.29 5.28 5.27 5.26 5.26 3.72 3.59 3.36 3.35 3.35 3.19 3.18 2.98

7.48 7.46 7.39 7.39 7.37 7.34 7.34 7.32 7.32 7.26 7.04 6.91 6.90

6.31 6.28

5.86 5.84 5.83 5.82 5.43 5.43 5.42 5.41 5.40 5.40 5.33 5.30 5.29 5.28 5.27 5.26 5.26 3.72 3.59 3.36 3.35 3.35 3.19 3.18 2.98

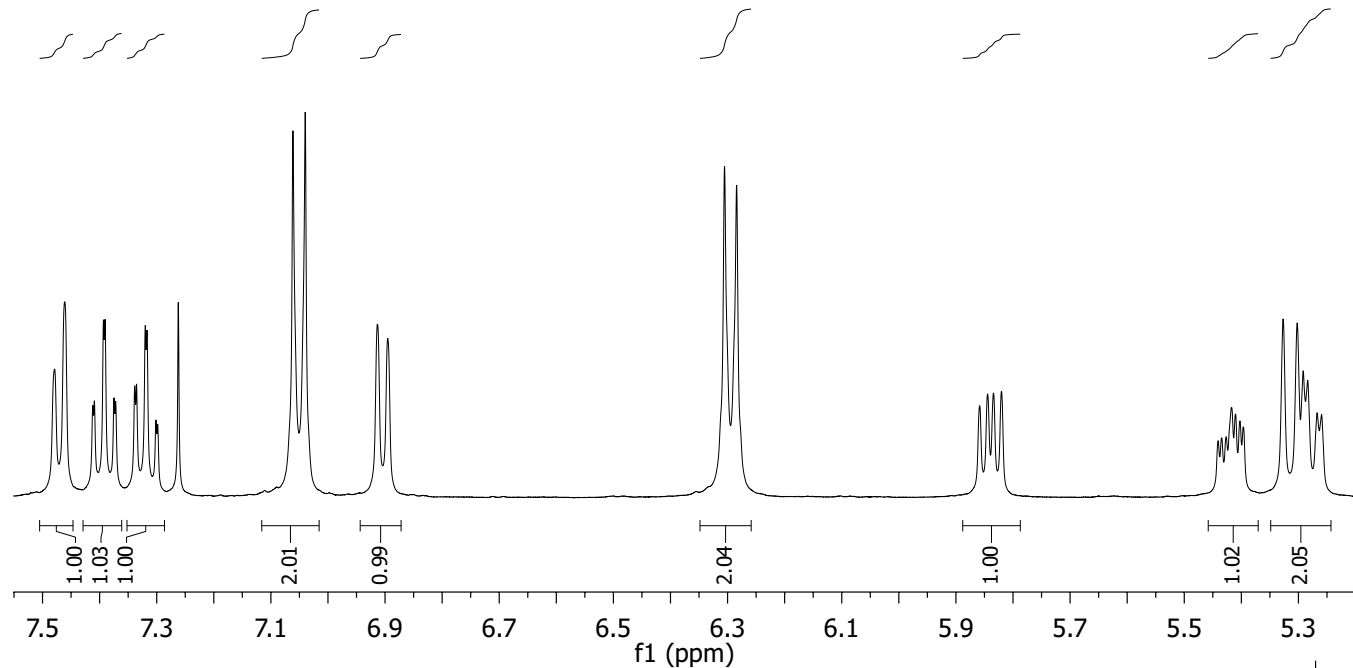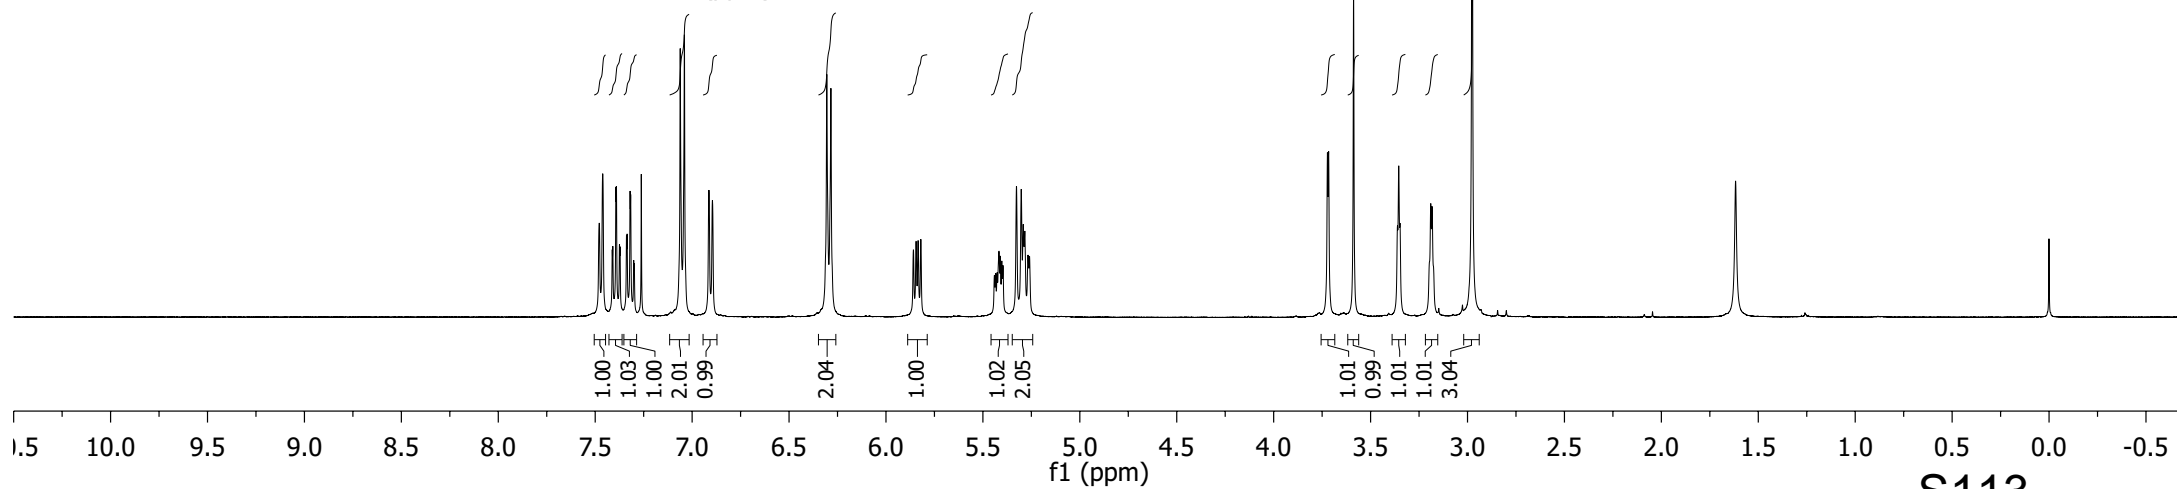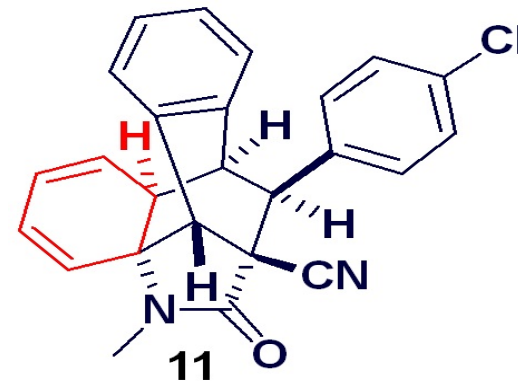

1.62

0.00

Solvent  $\text{CDCl}_3$  — 171.03  
 Spectrometer Frequency 100

— 137.41  
 — 136.80

— 133.79

— 131.98

— 130.31

— 128.62

— 128.51

— 128.11

— 128.04

— 127.74

— 127.51

— 122.33

— 121.11

— 116.69

77.31  
 76.99  
 76.68

— 64.98

53.66  
 51.09  
 50.78  
 47.16  
 44.15

— 27.54

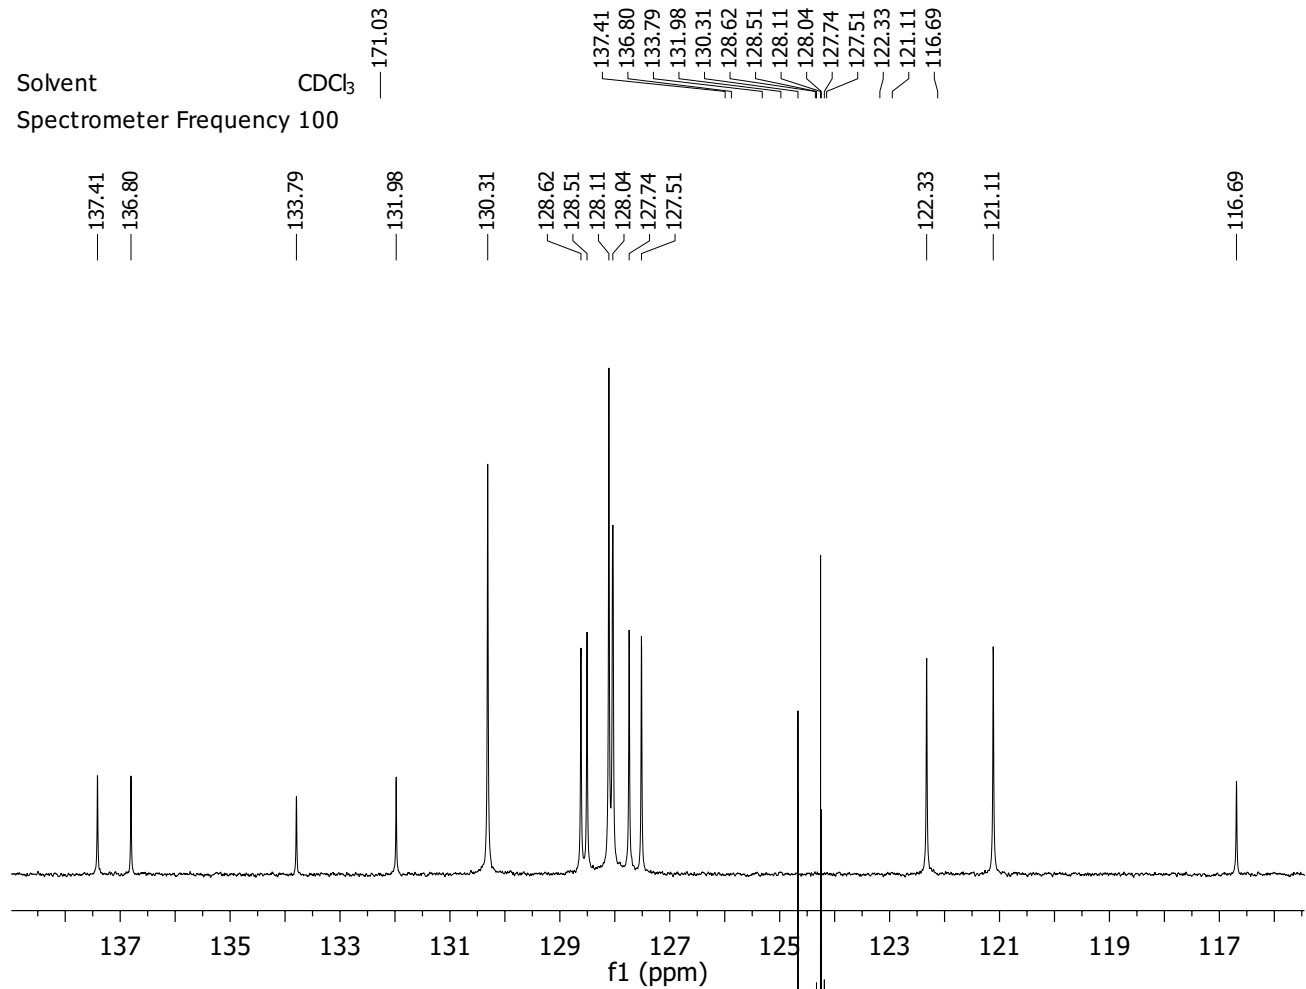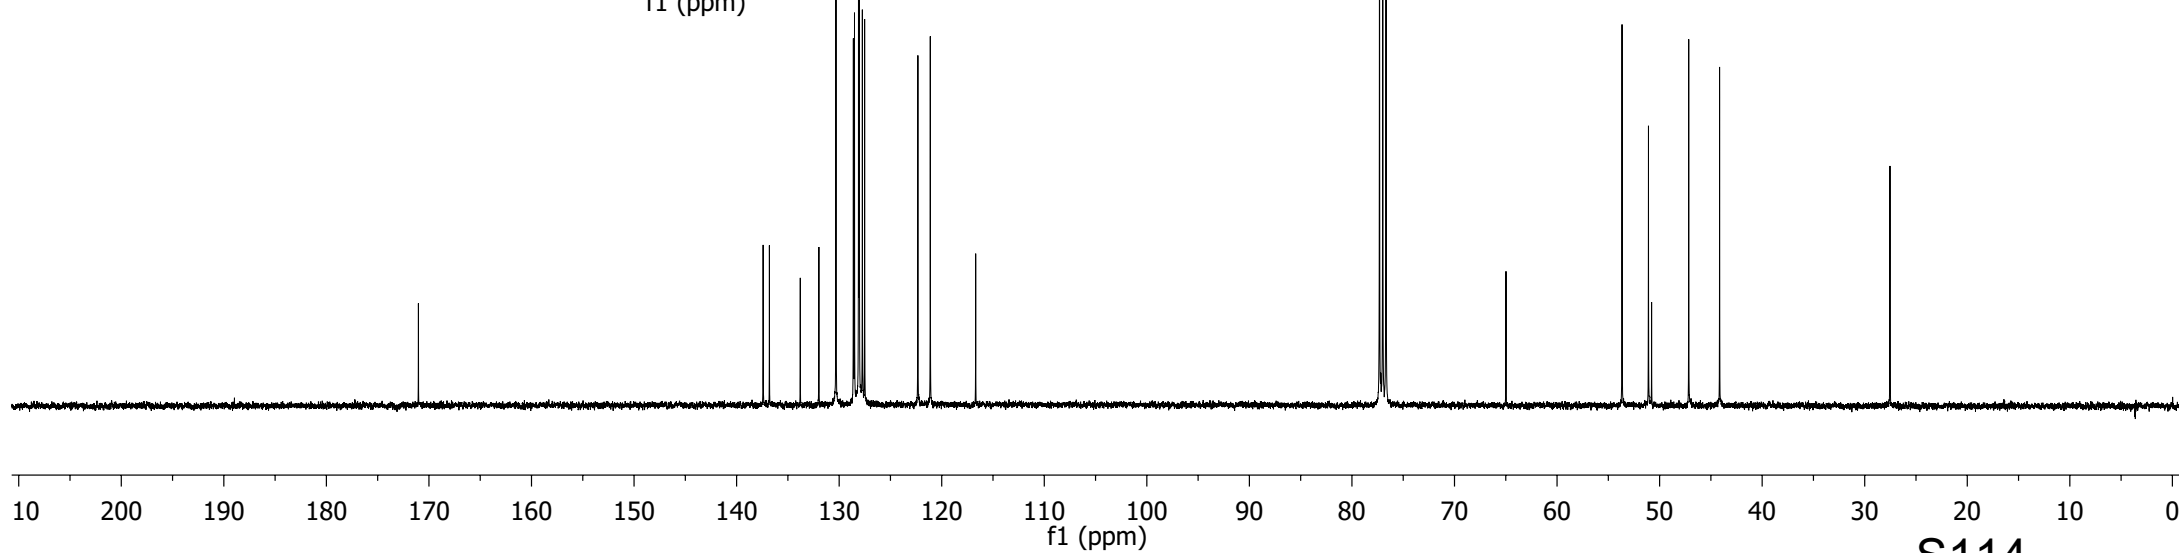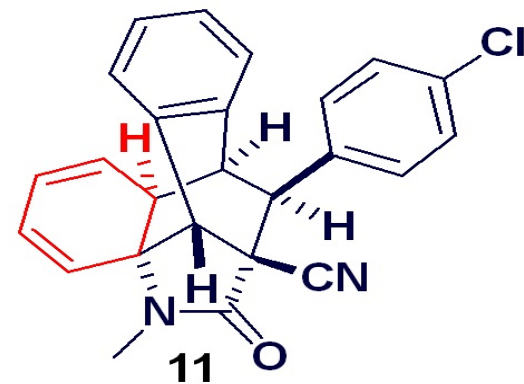

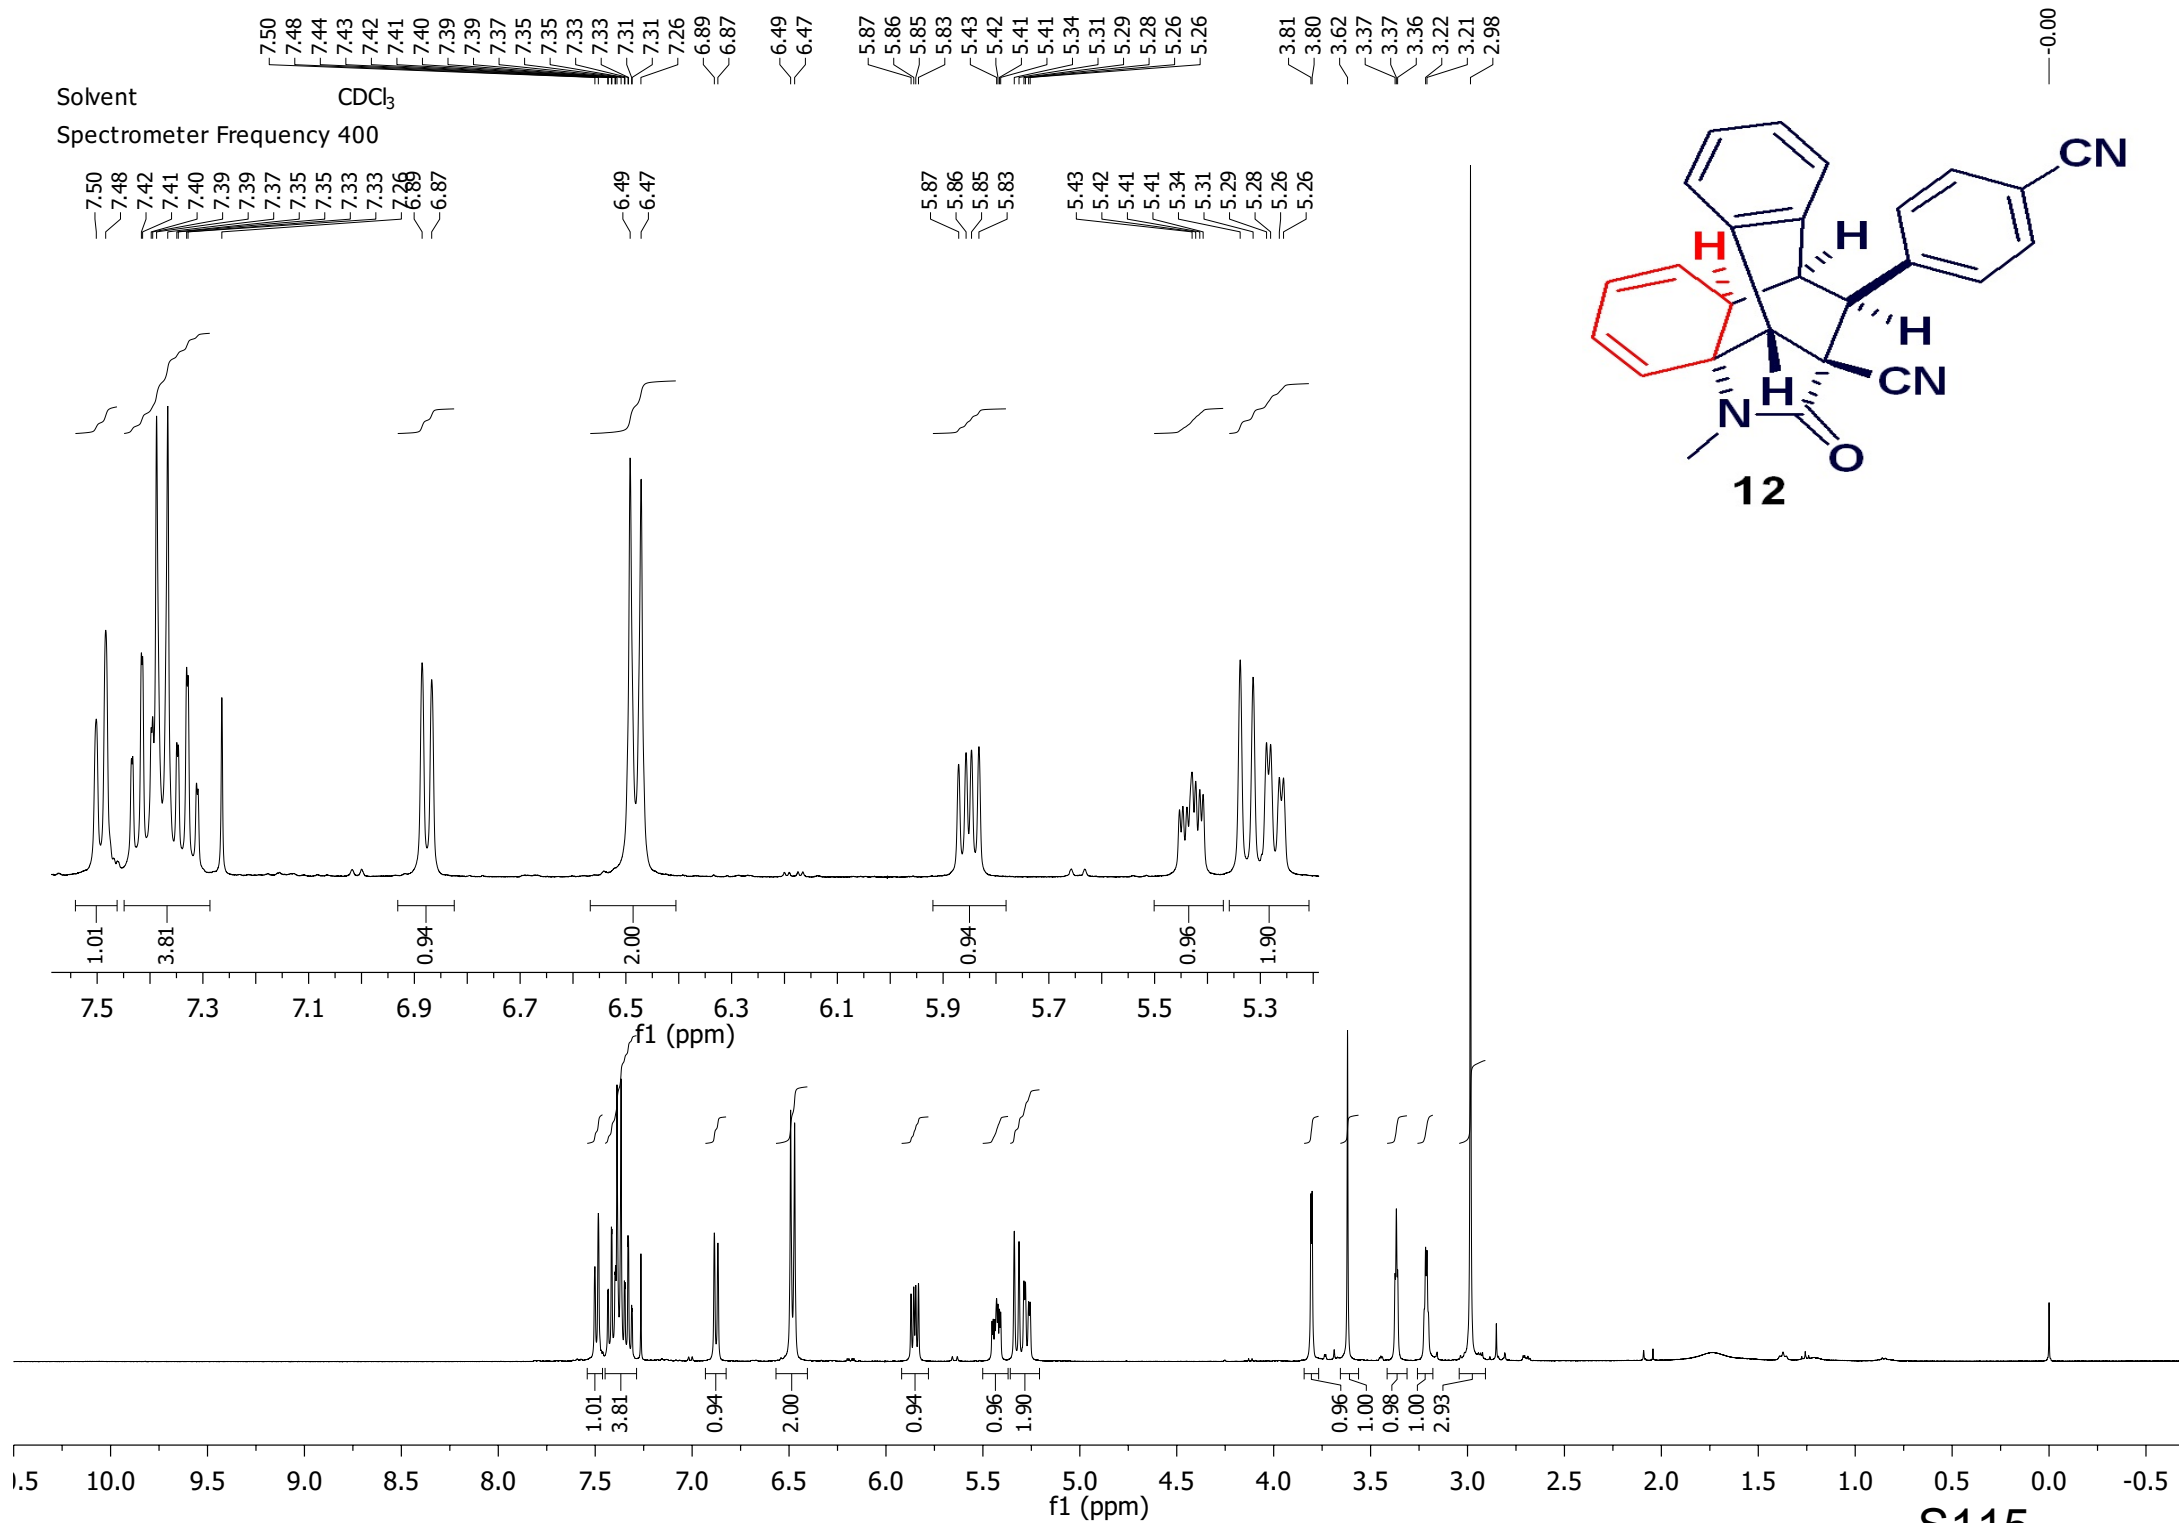

Solvent

$\text{CDCl}_3$

Spectrometer Frequency 100

— 170.64

— 143.36

— 136.92

— 131.67

— 129.78

— 128.15

— 128.01

— 127.43

— 122.16

— 121.29

— 118.34

— 116.48

— 111.79

— 77.31

— 76.99

— 76.67

— 64.99

— 53.49

— 51.49

— 50.40

— 46.79

— 44.10

— 27.57

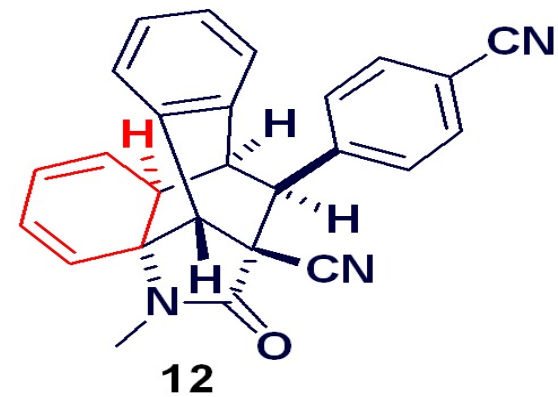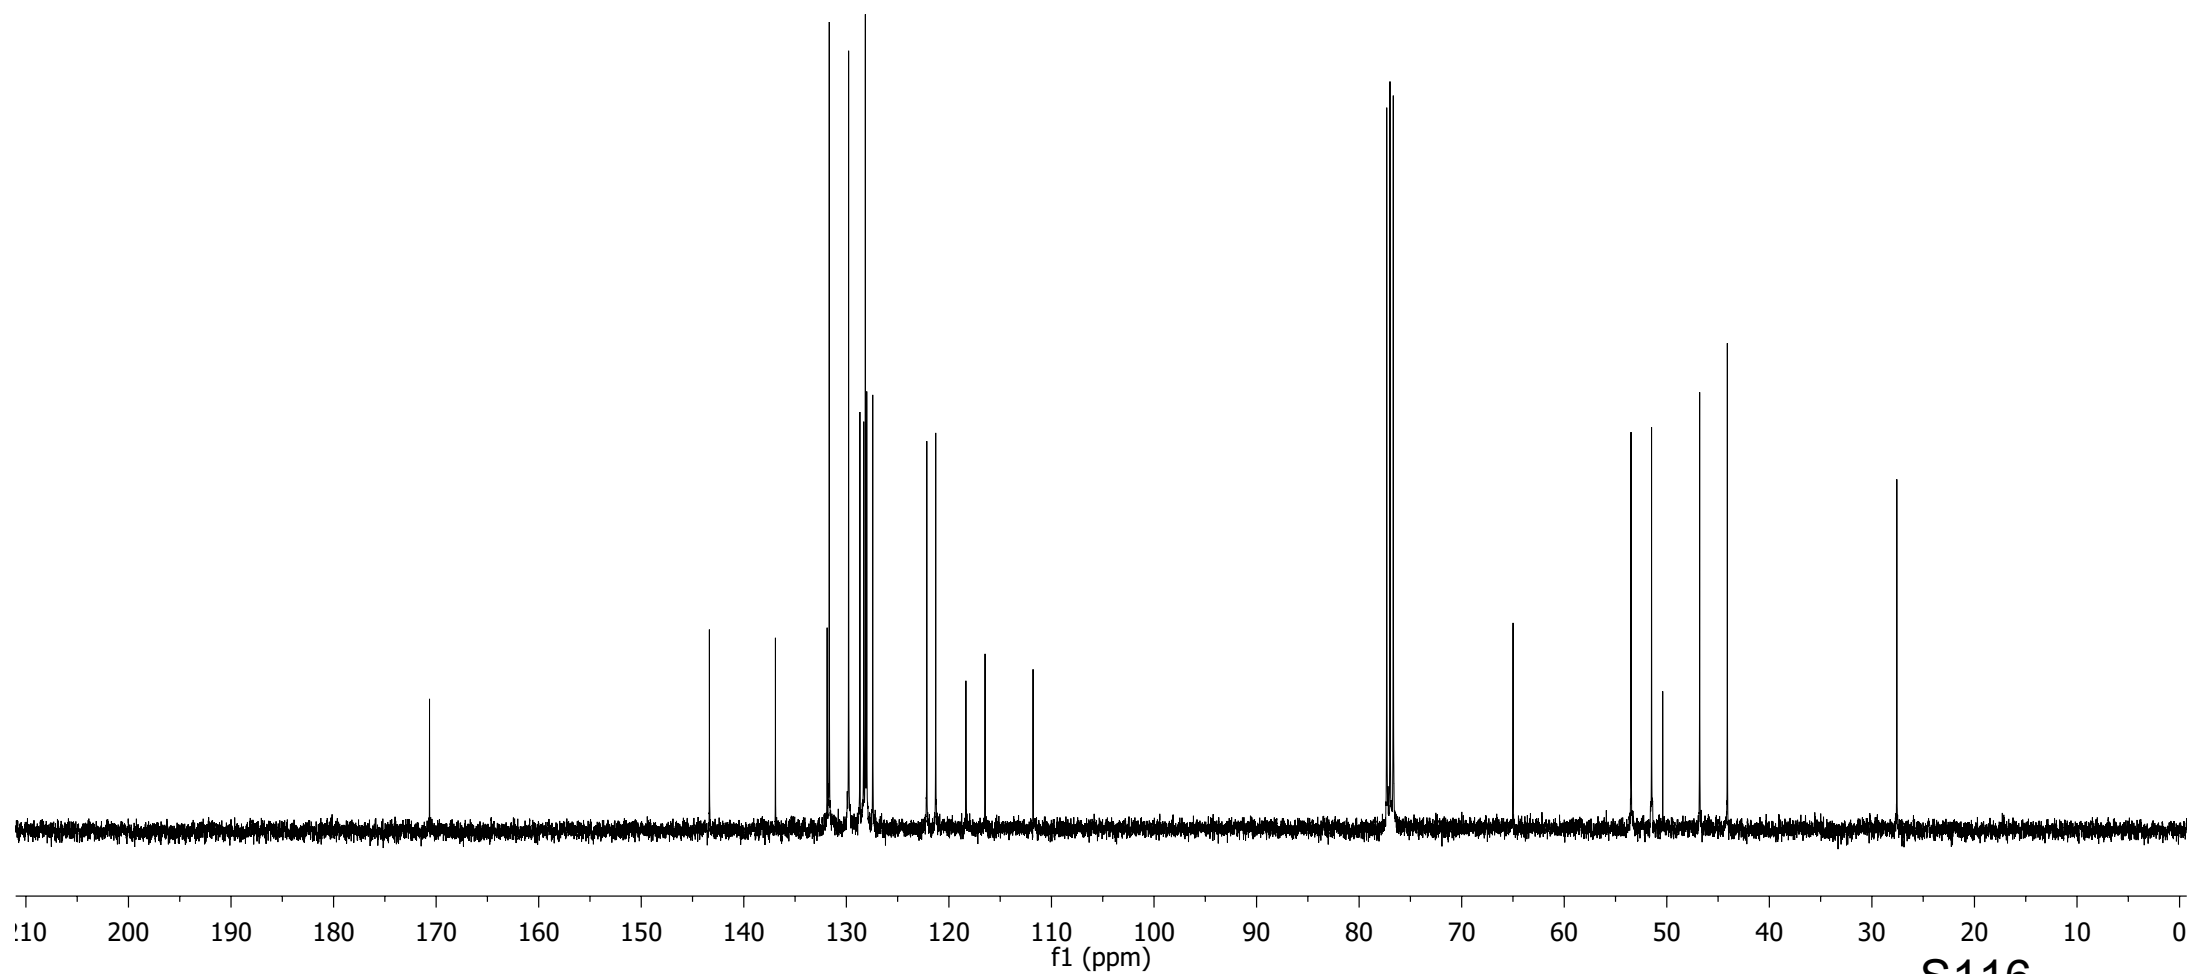

S116

Solvent

CDCl<sub>3</sub>

Spectrometer Frequency 400

8.24 8.06 8.05 8.03 8.03 7.52 7.45 7.45 7.42 7.35 7.34 7.26 7.24 7.24 6.55 6.00 5.89 5.87 5.86 5.85 5.45 5.35 5.33 5.31 5.30 5.28 3.89 3.88 3.82 3.81 3.74 3.64 3.46 3.42 3.24 3.23 3.17 3.16 3.06 3.00 2.87 2.82

1.68

-0.00

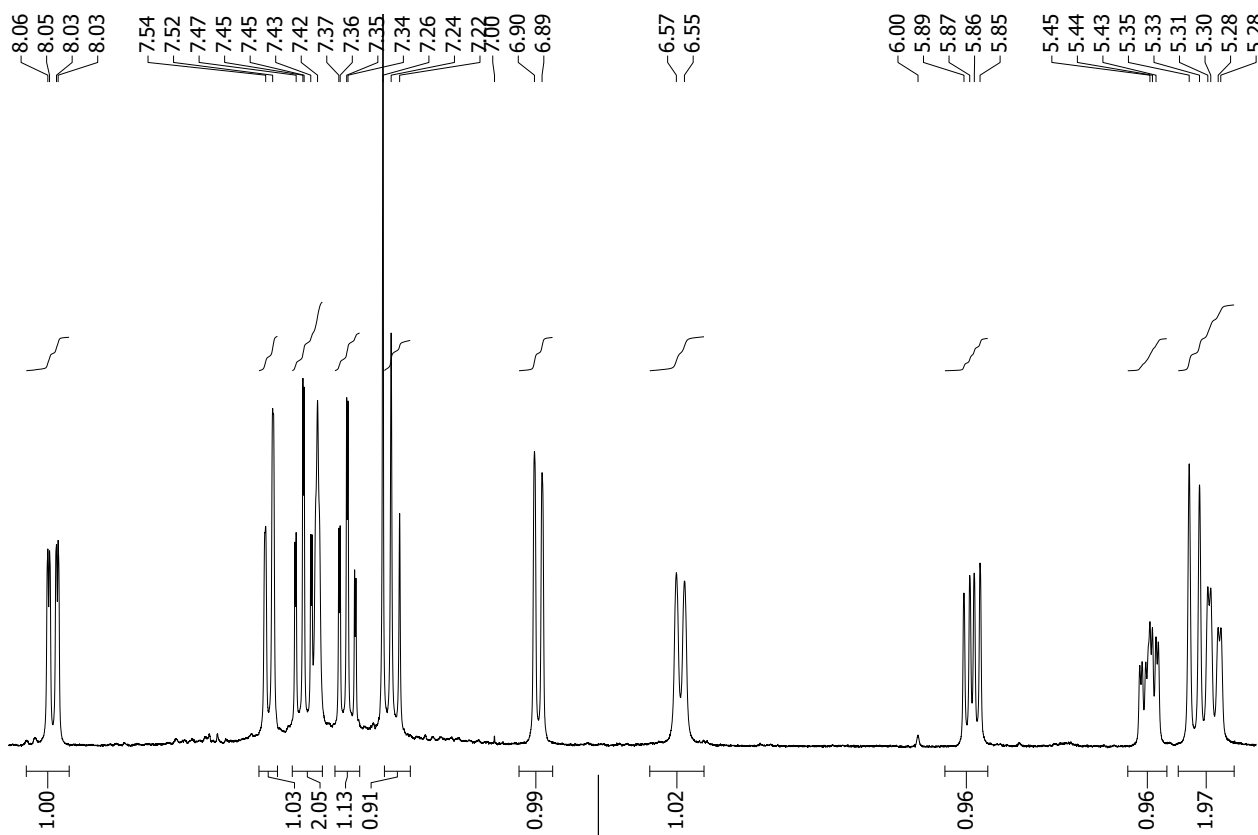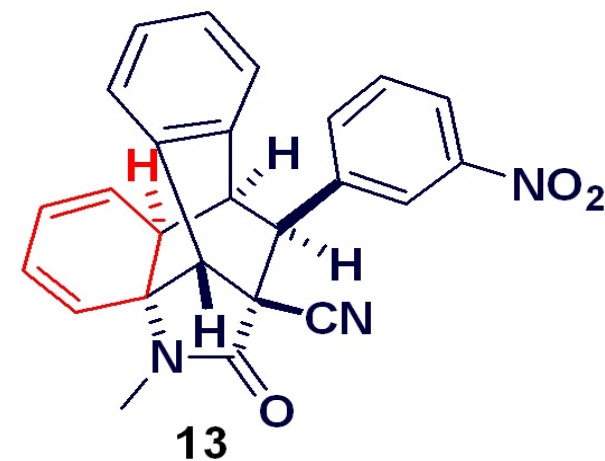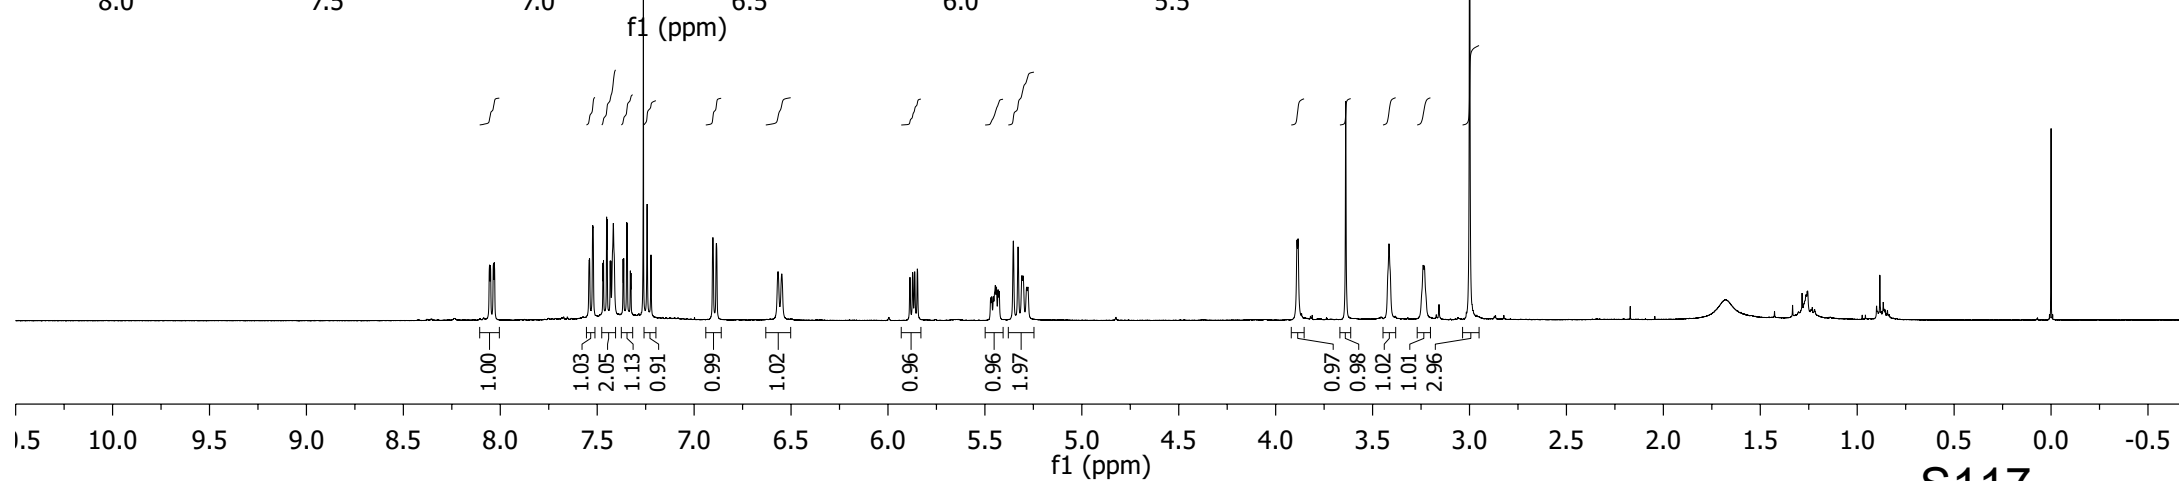

S117

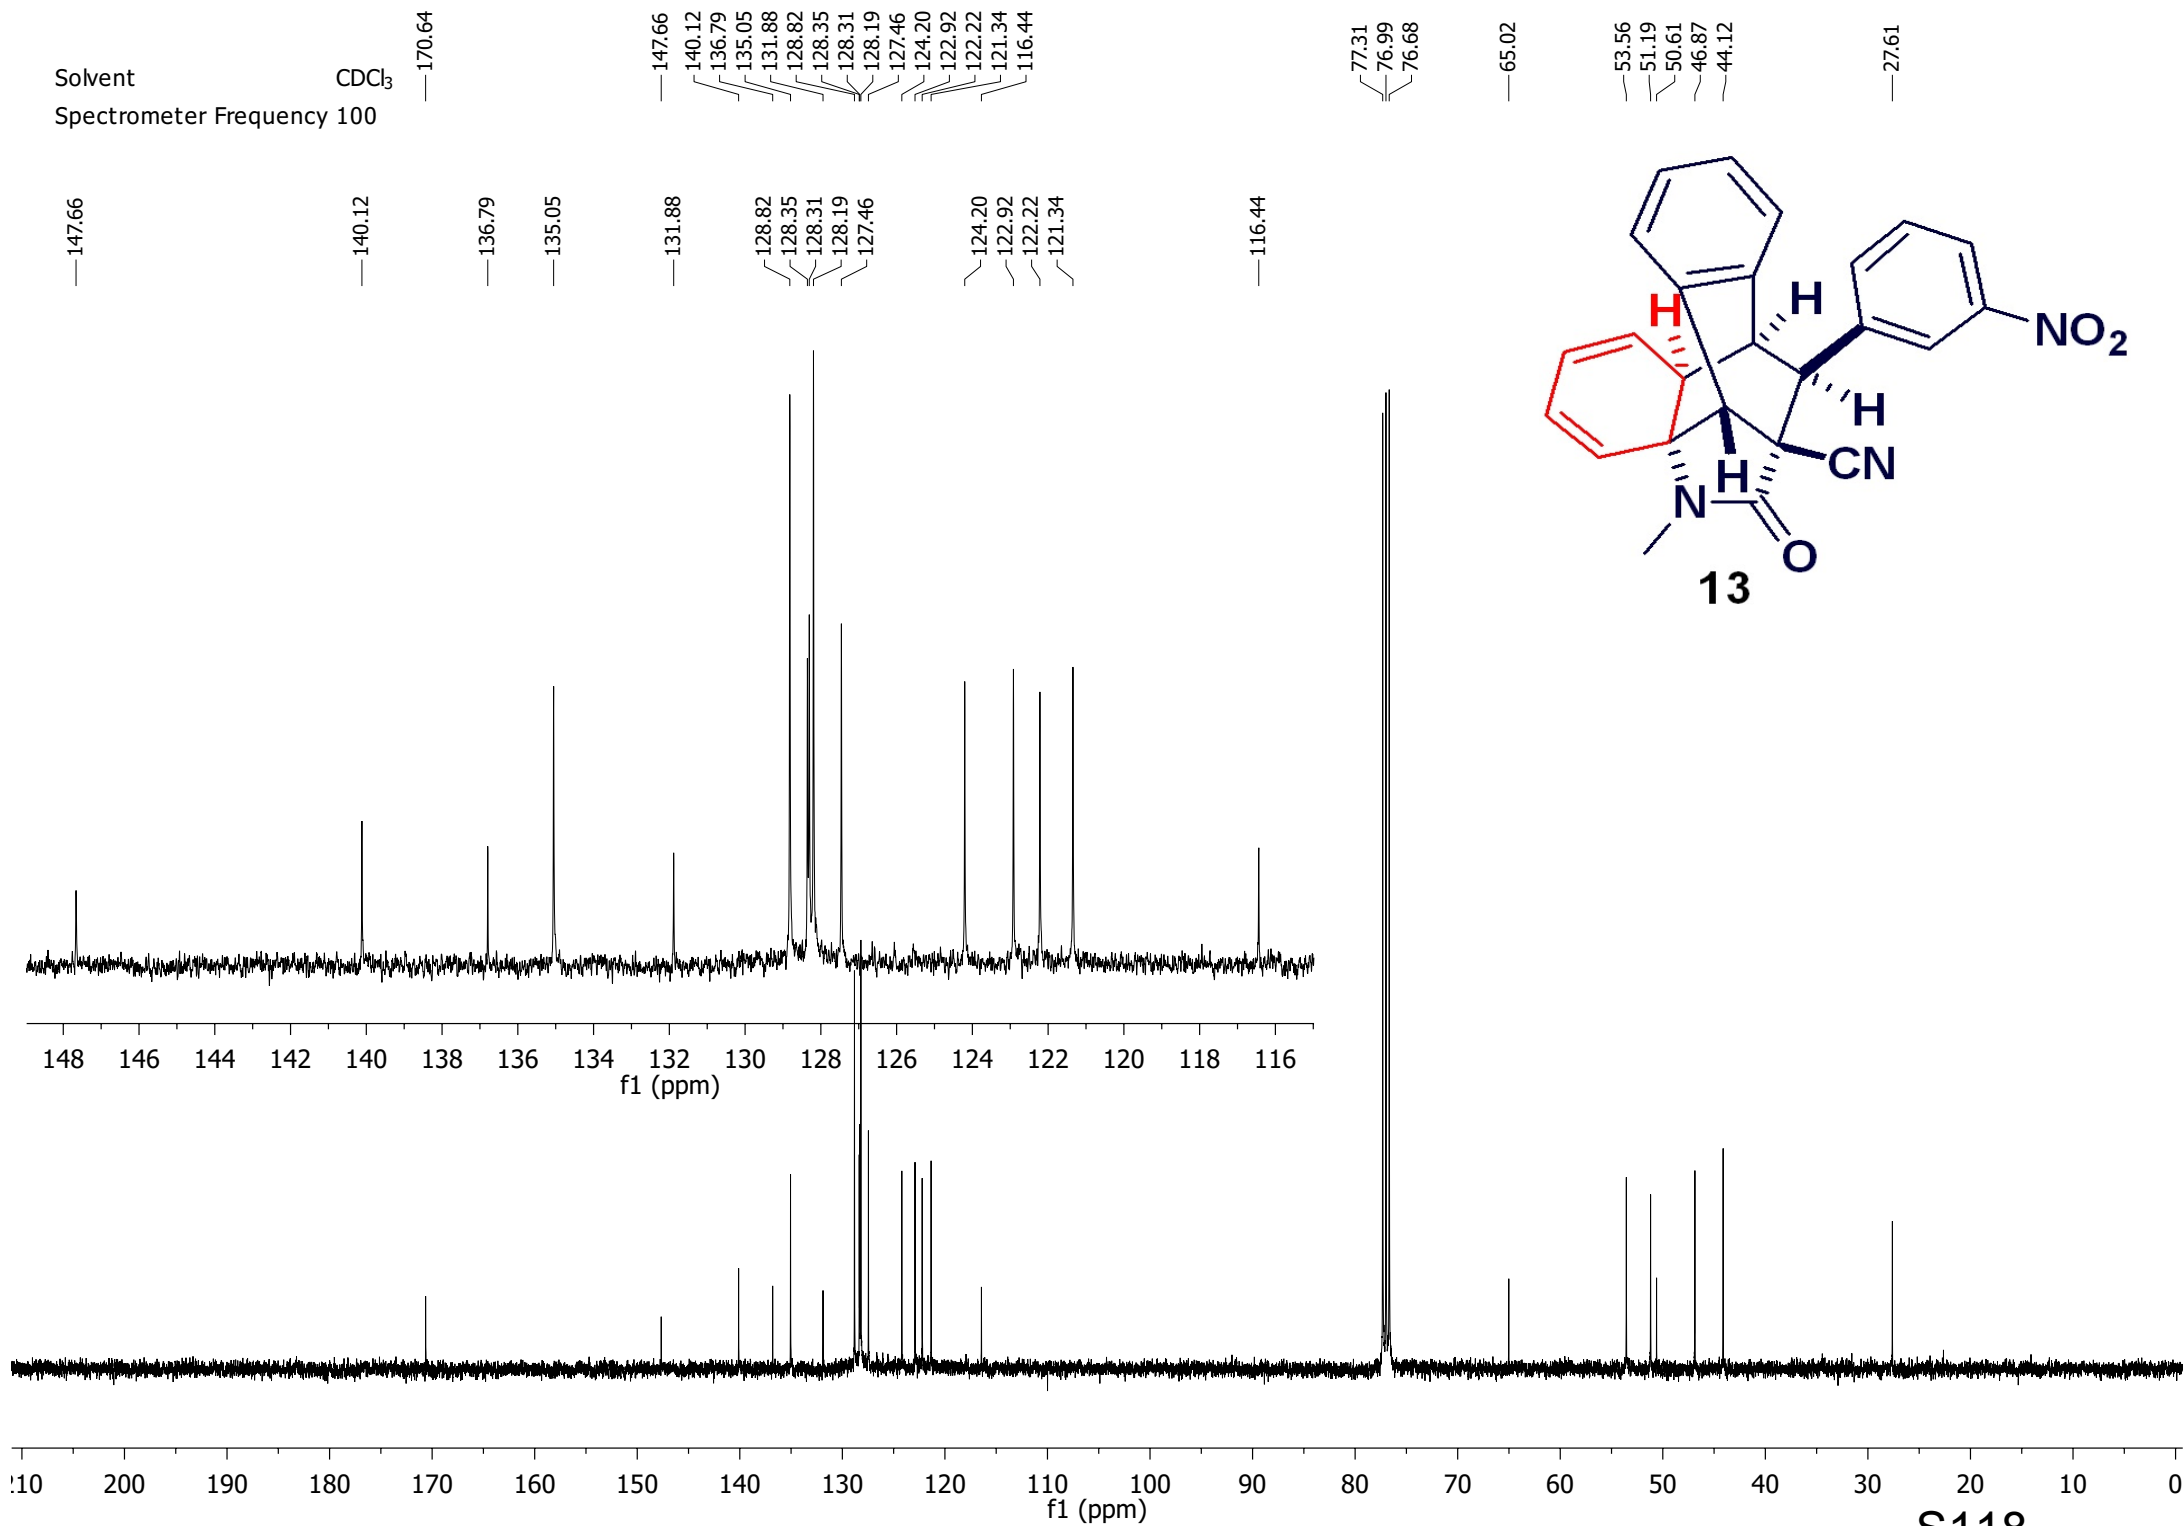

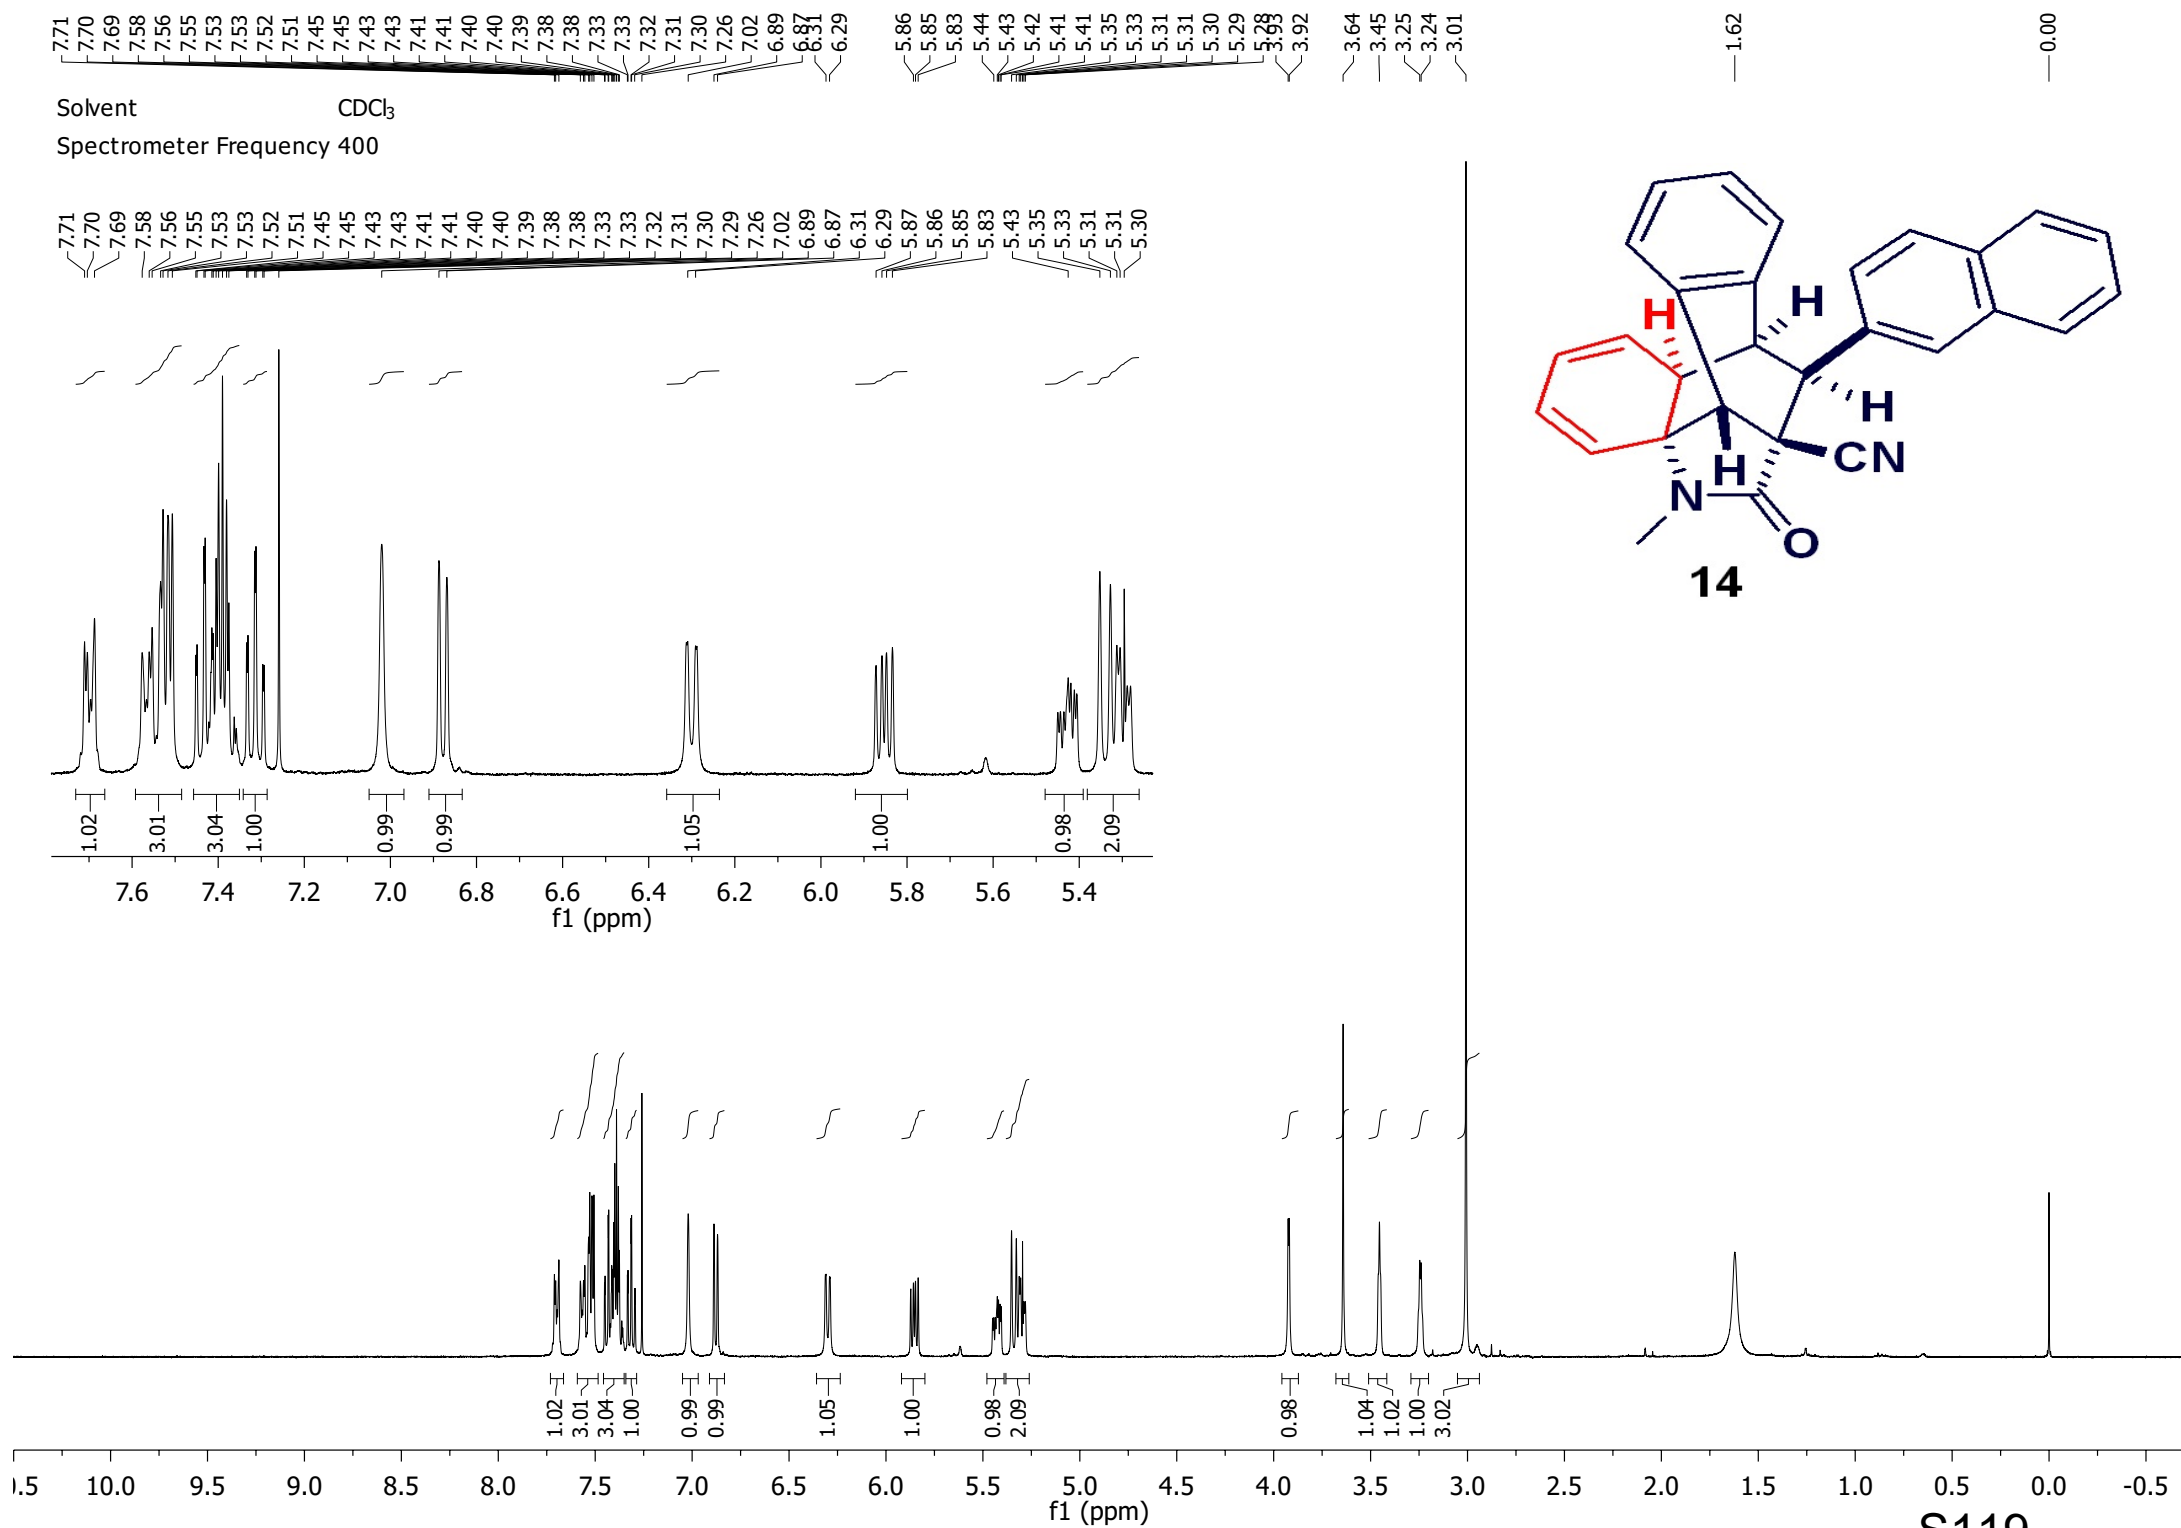

Solvent  
Spectrometer Frequency 100

$\text{CDCl}_3$

171.32

137.93  
135.87  
132.76  
132.69  
132.16  
128.81  
128.49  
128.43  
128.07  
128.02  
127.97  
127.62  
127.57  
127.40  
127.36  
126.58  
126.07  
125.92  
122.48  
121.08  
116.86

77.31  
76.99  
76.68

65.06

53.86  
51.95  
50.94  
47.46  
44.28

27.57

137.93

135.87

132.76

132.69

132.16

128.81

128.49

128.43

128.07

128.02

127.97

127.62

127.57

127.40

127.36

126.58

126.07

125.92

122.48

121.08

116.86

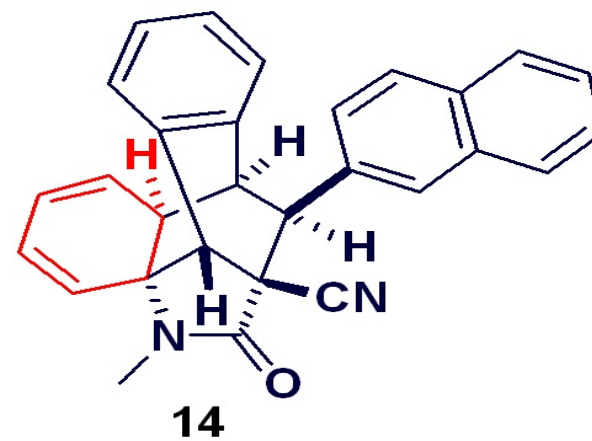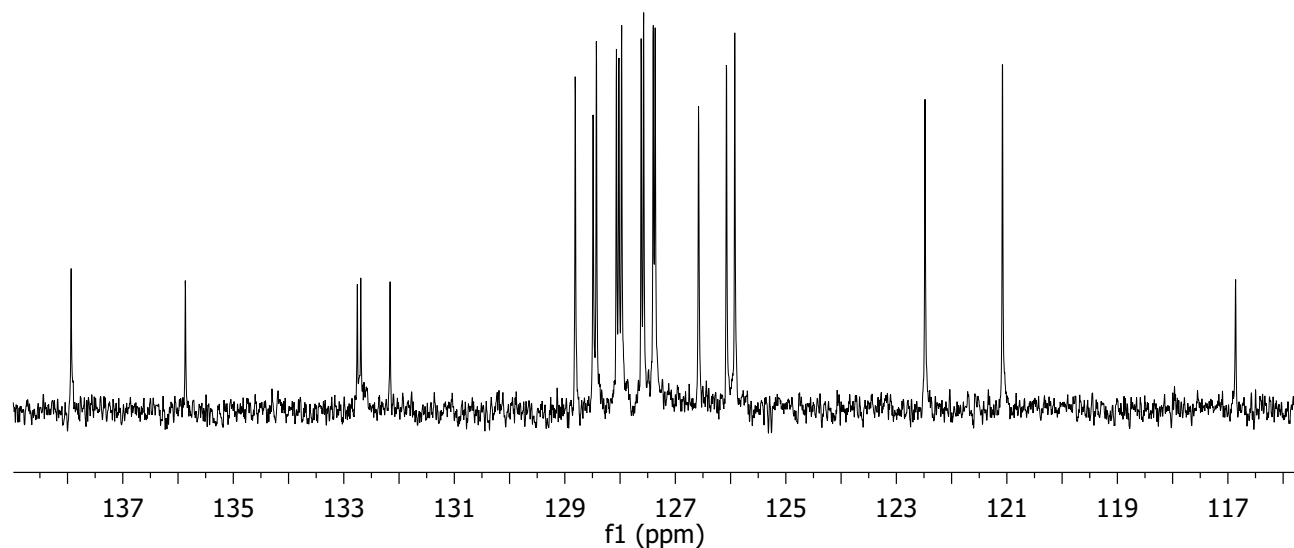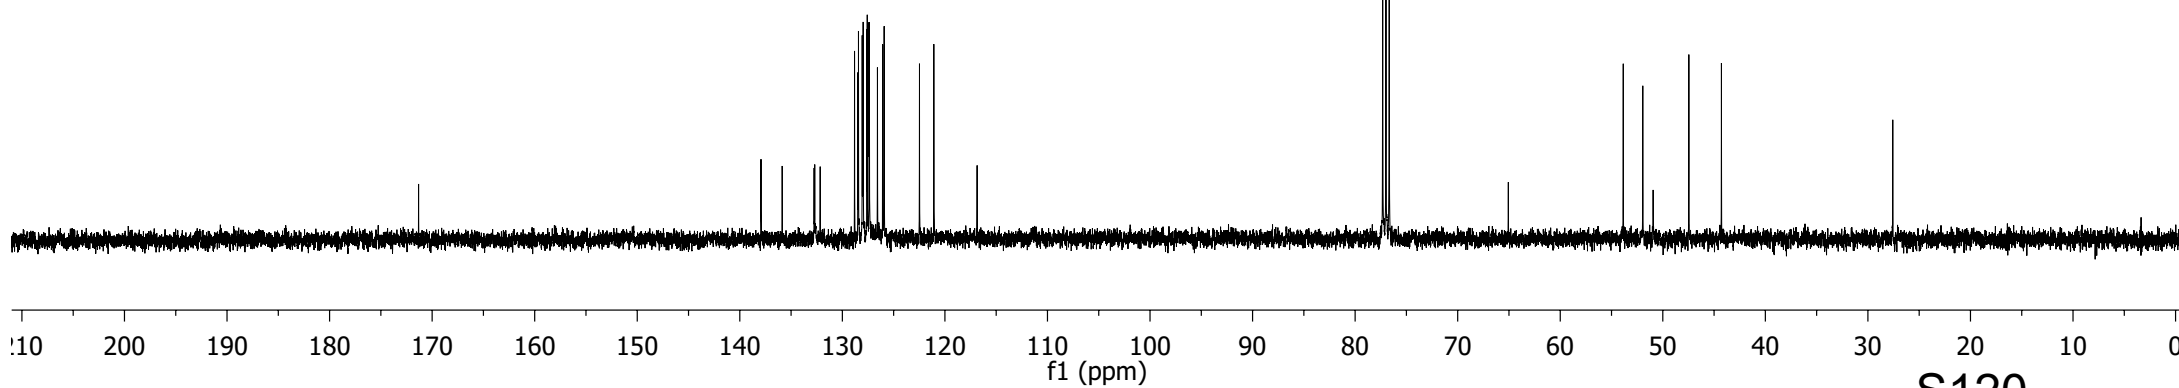

S120

Solvent  $\text{CDCl}_3$   
Spectrometer Frequency 400

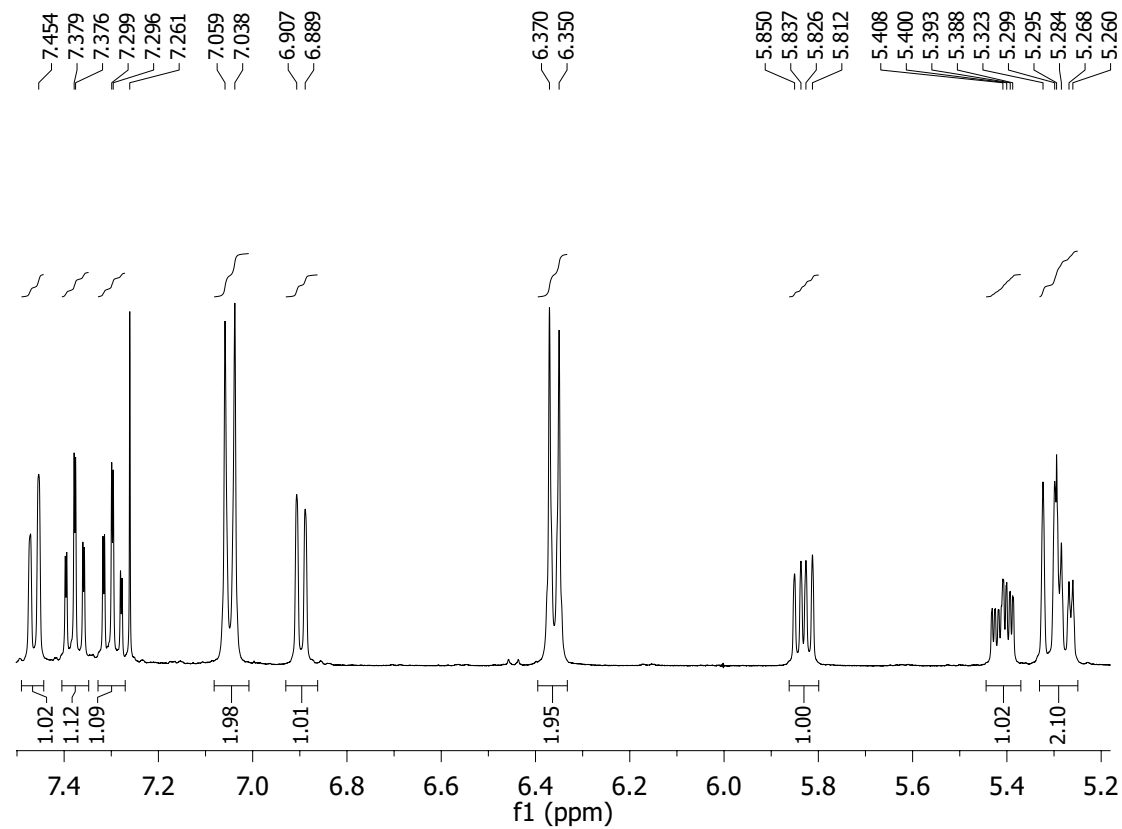

7.454  
7.379  
7.376  
7.299  
7.296  
7.261  
7.059  
7.038  
6.907  
6.889  
6.370  
6.350  
5.850  
5.837  
5.826  
5.812  
5.408  
5.400  
5.393  
5.388  
5.323  
5.299  
5.295  
5.284  
5.268  
5.260  
4.333  
3.738  
3.731  
3.581  
3.378  
3.371  
3.365  
3.325  
3.200  
3.192  
3.185  
3.178  
2.985  
2.976

2.043  
1.618  
1.258  
0.000

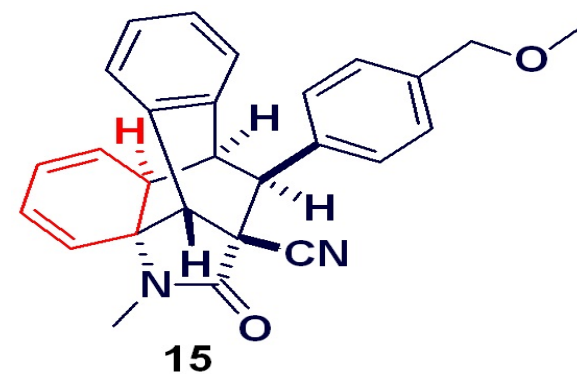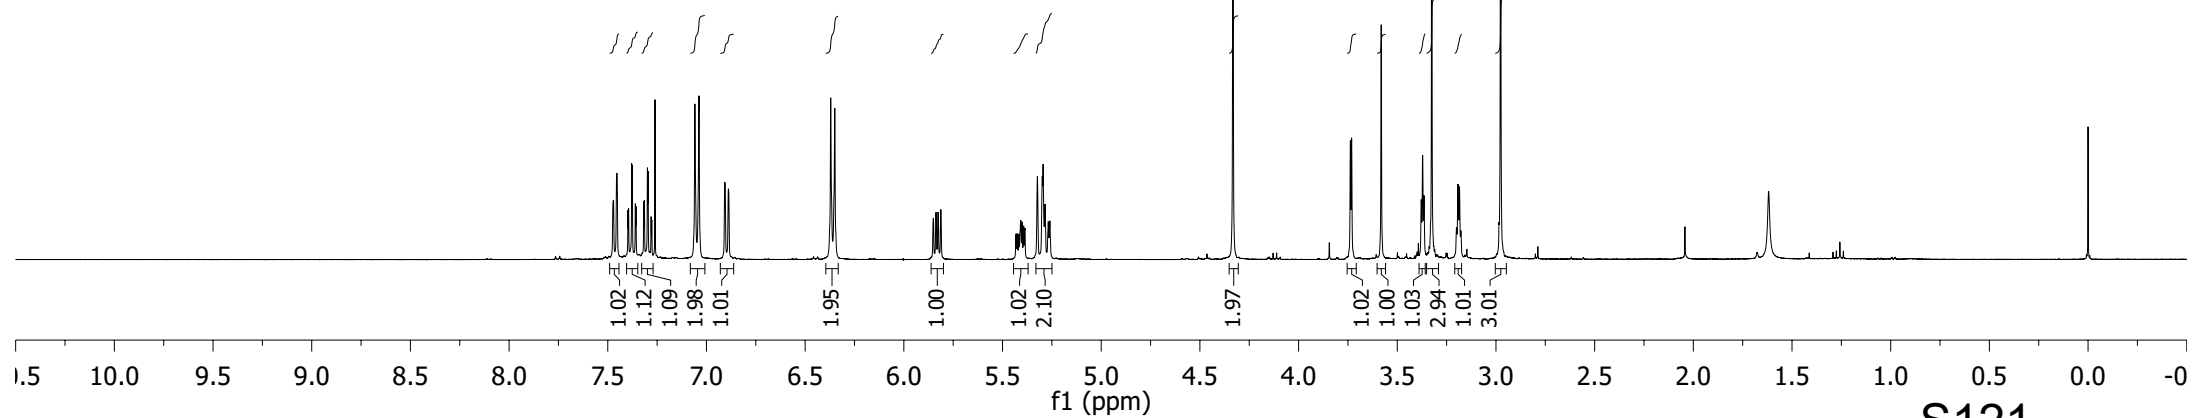

S121

Solvent  $\text{CDCl}_3$   
Spectrometer Frequency 100

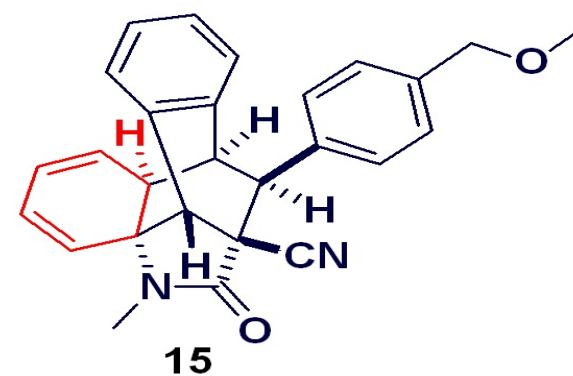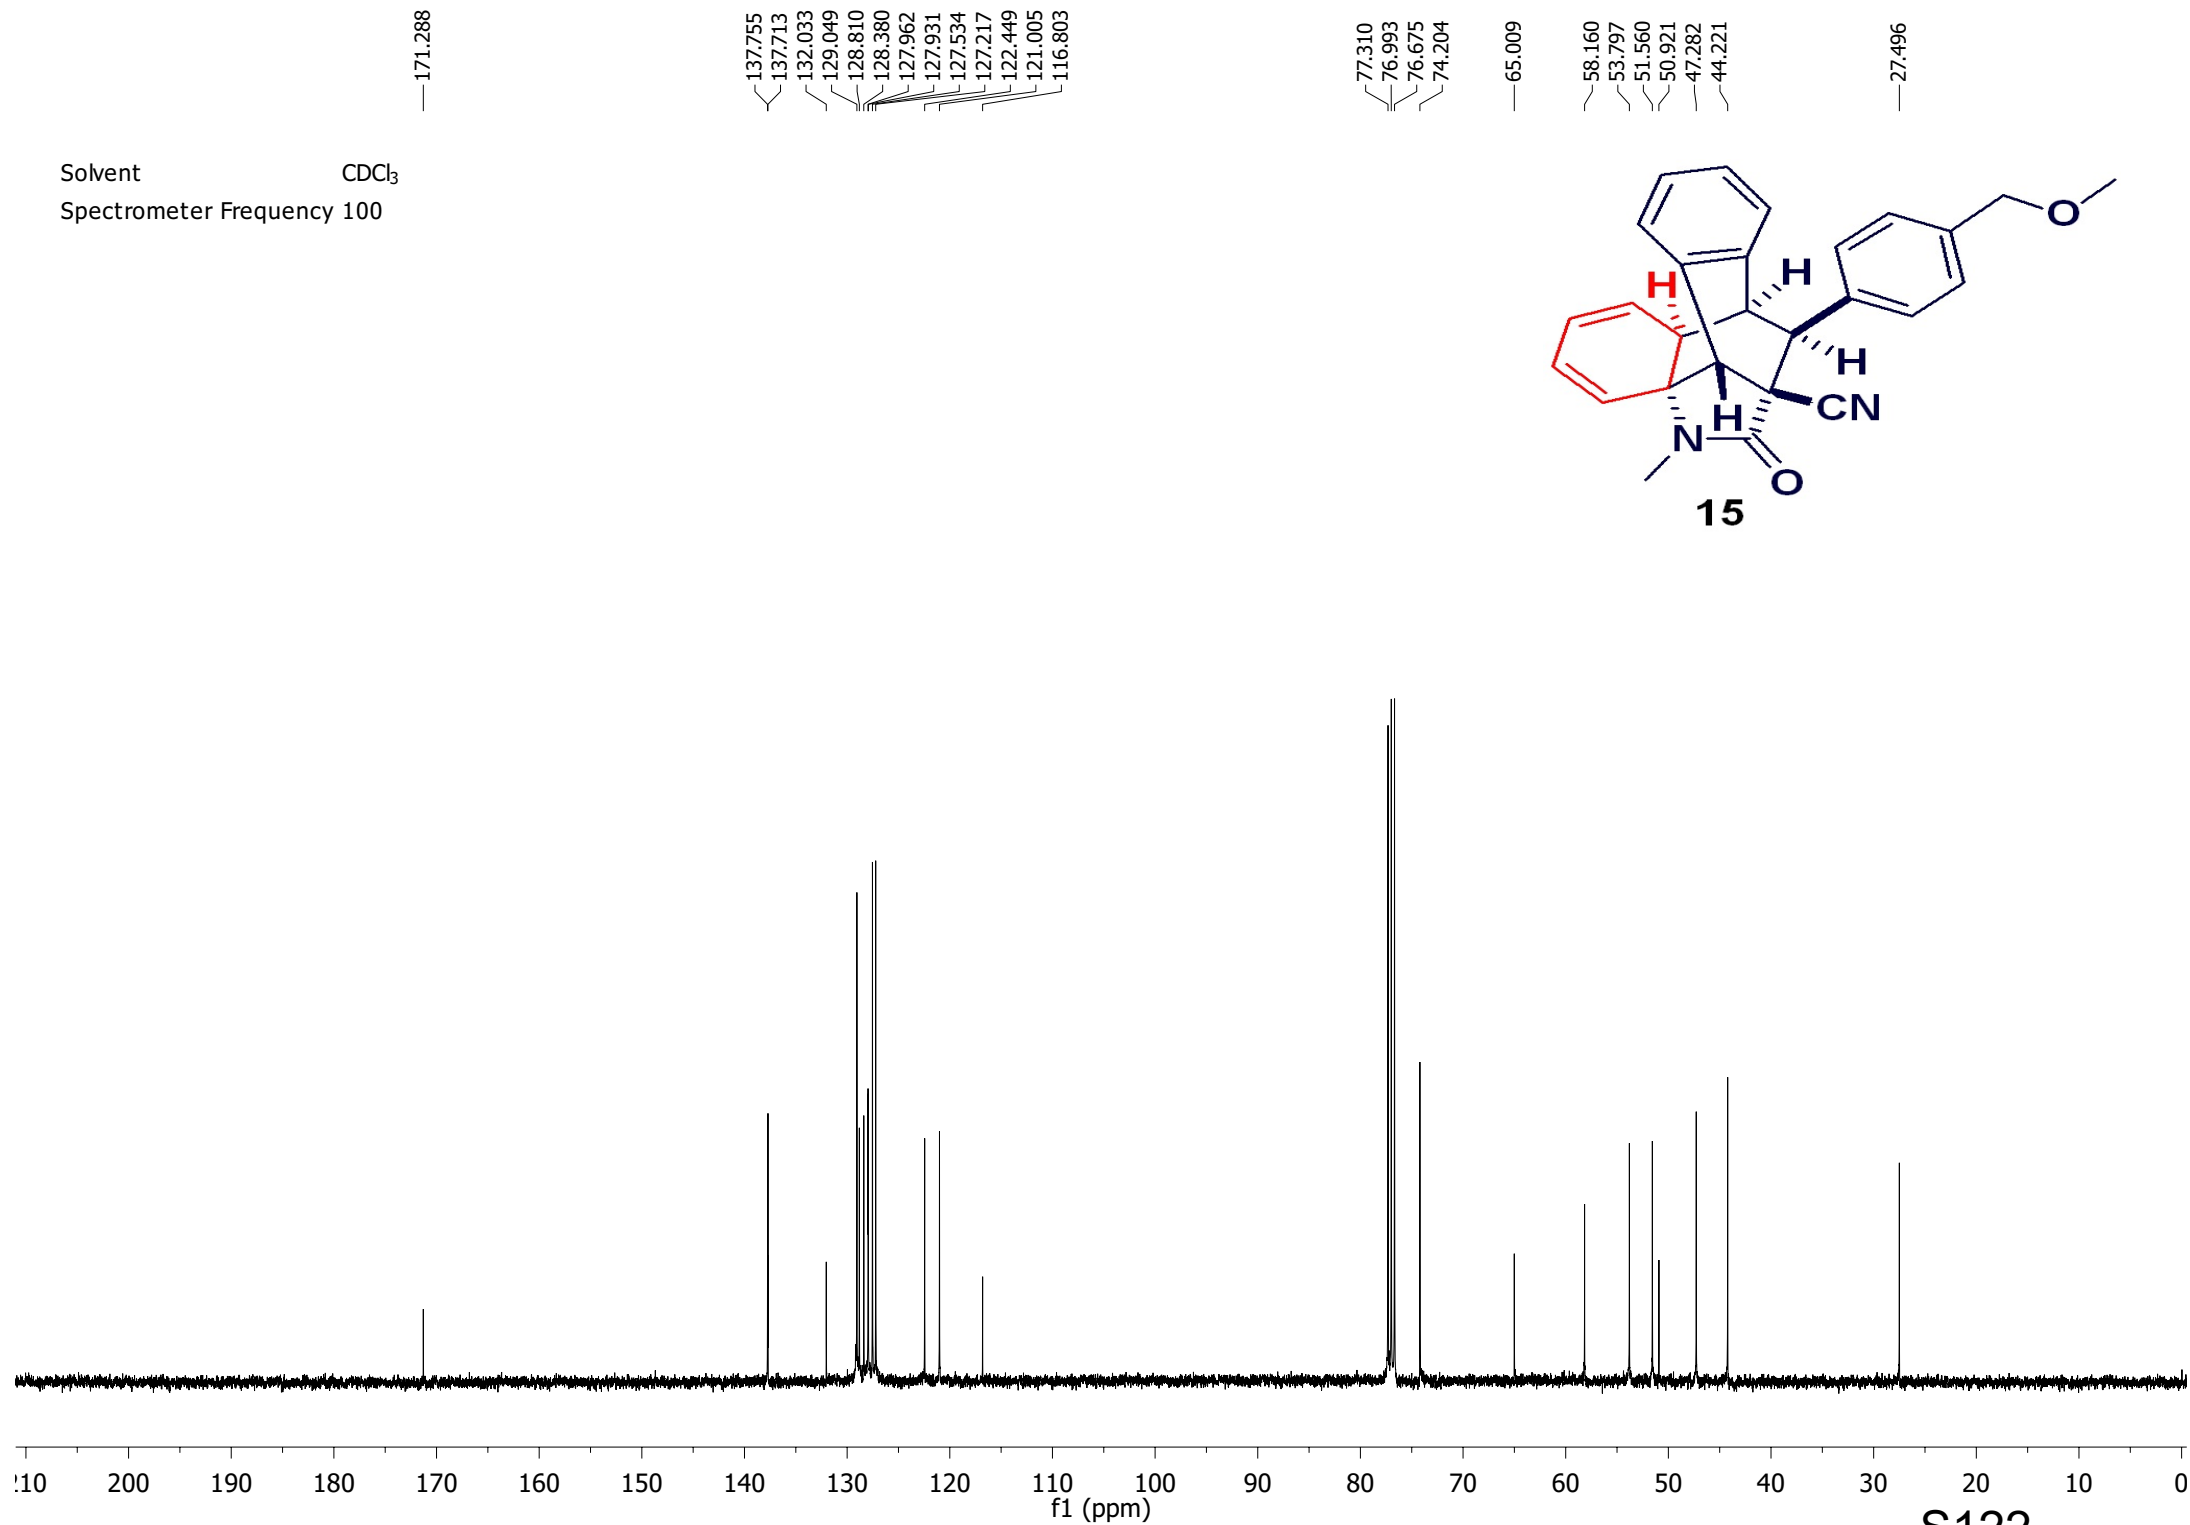

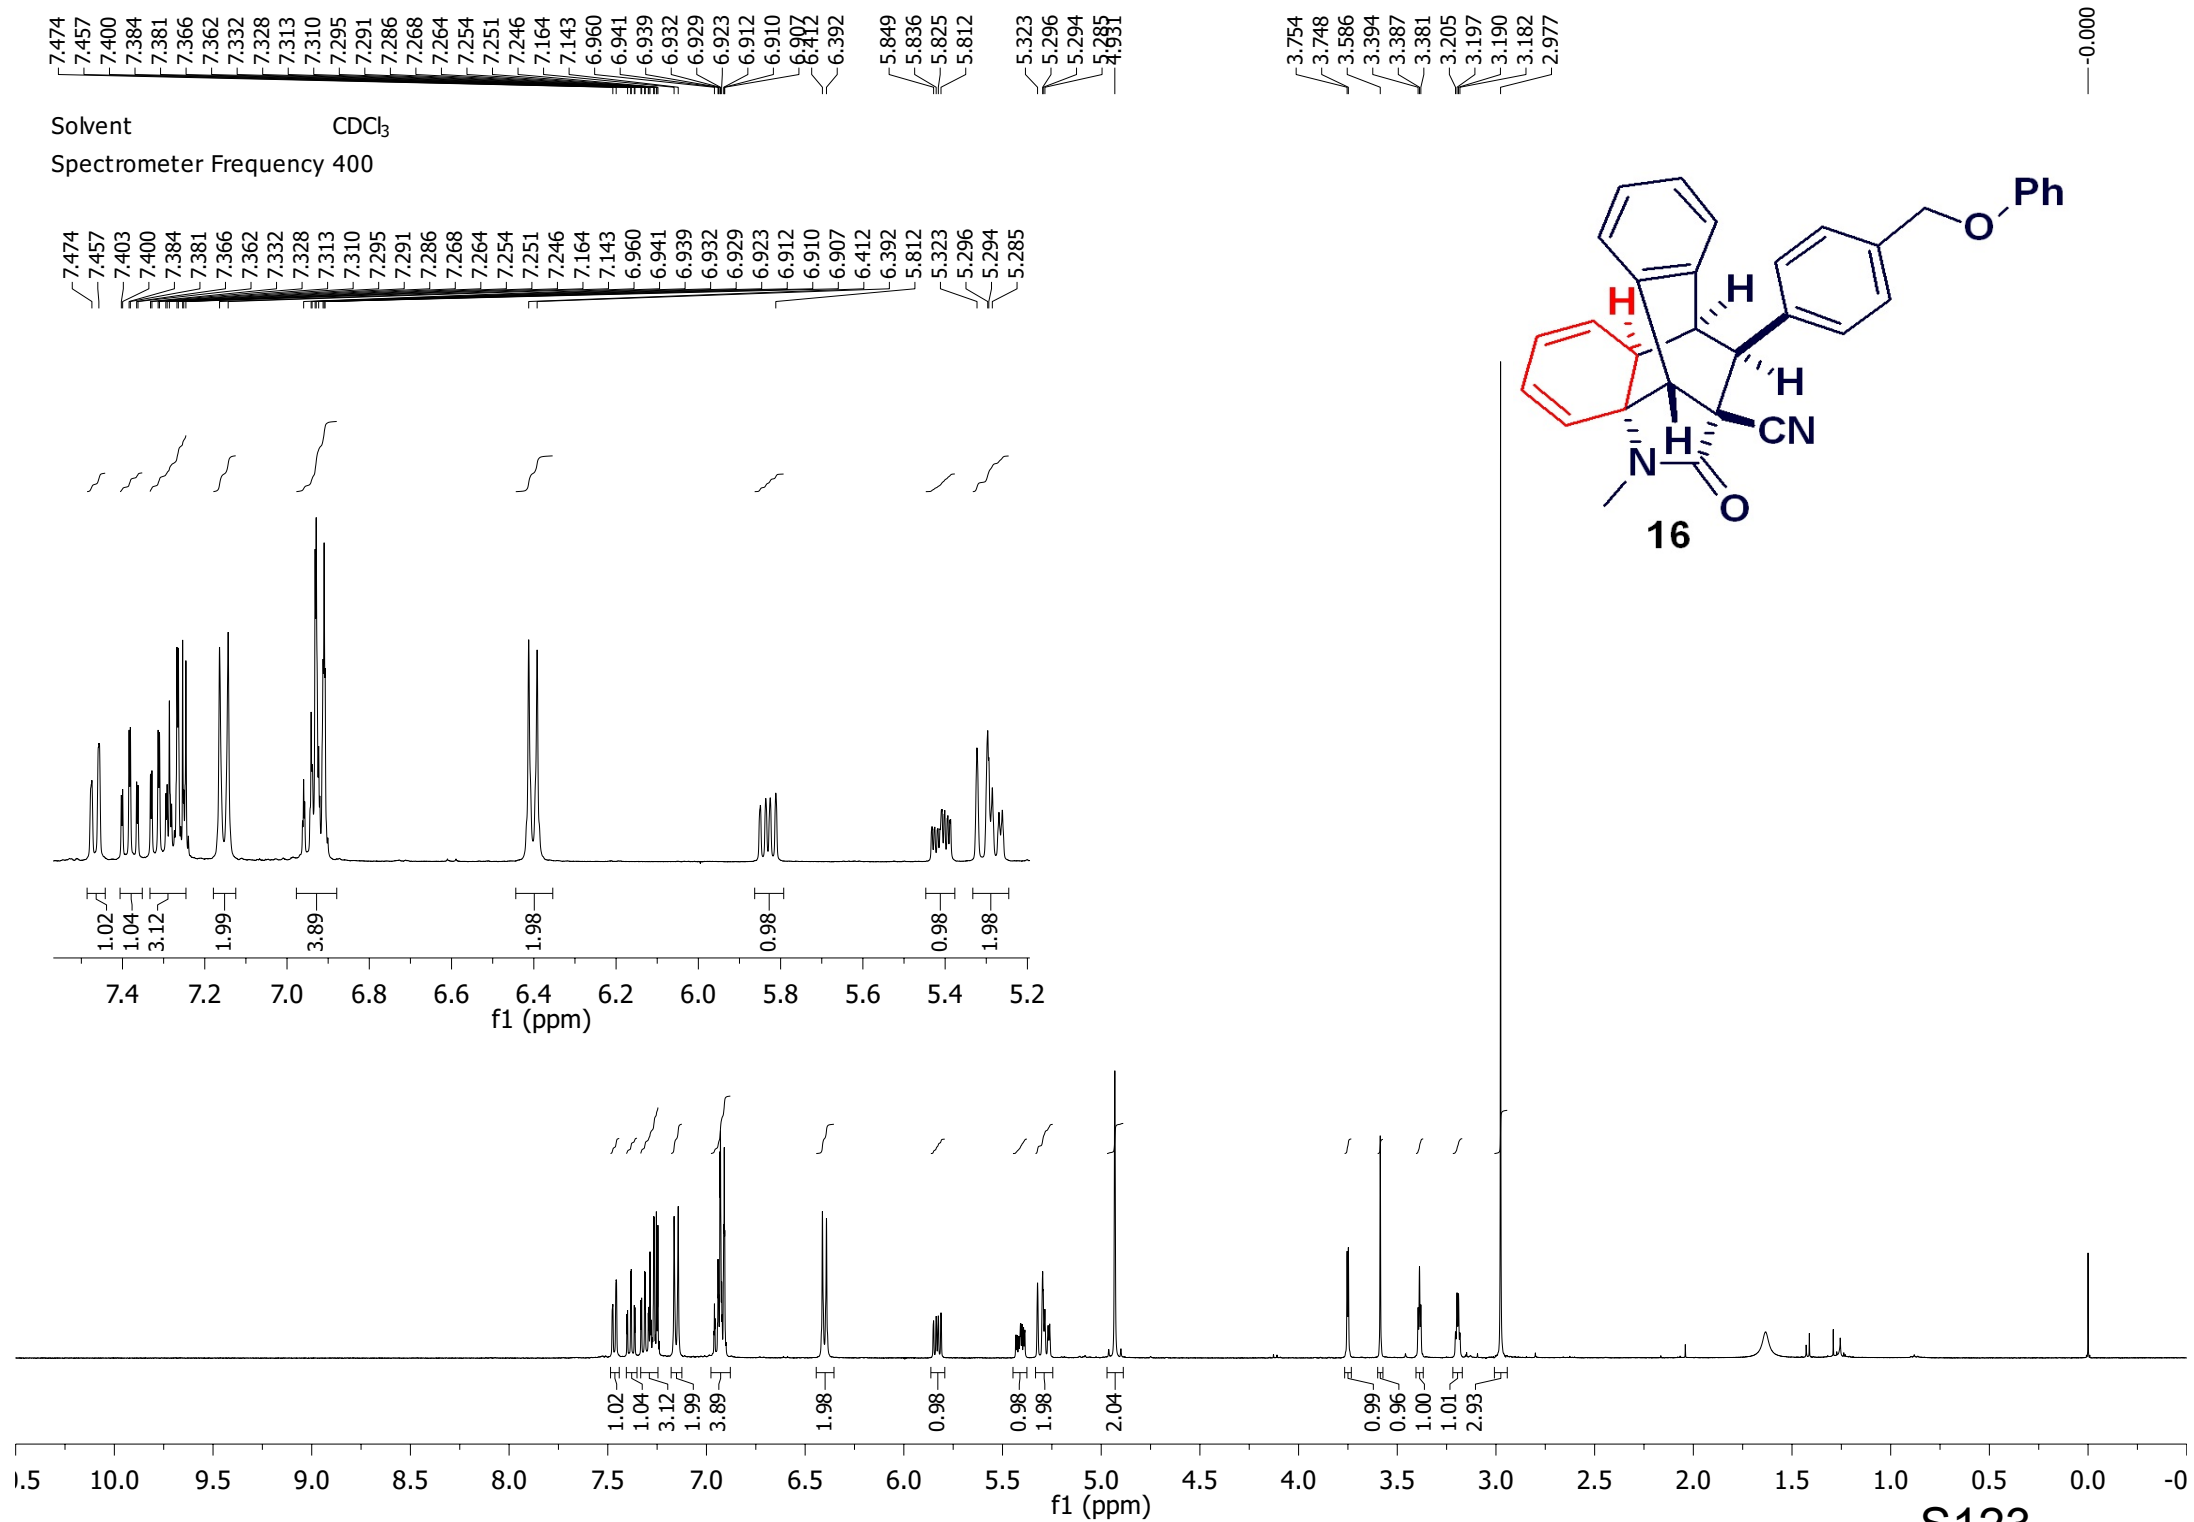

Solvent  $\text{CDCl}_3$   
Spectrometer Frequency 100

—171.250

—158.677

138.022

137.713

136.579

132.025

129.405

129.210

128.774

128.413

127.973

127.954

127.571

127.535

126.980

122.412

121.019

120.890

116.802

114.743

77.308

76.991

76.674

69.434

65.020

53.756

51.538

50.920

47.187

44.224

27.498

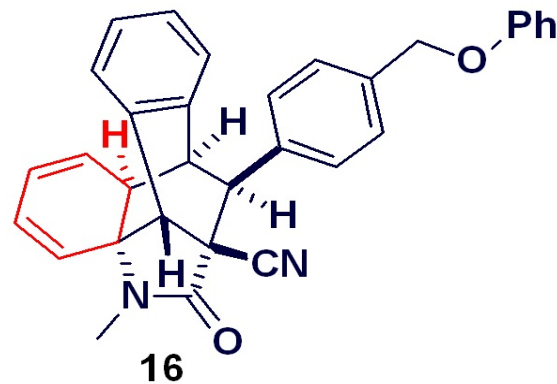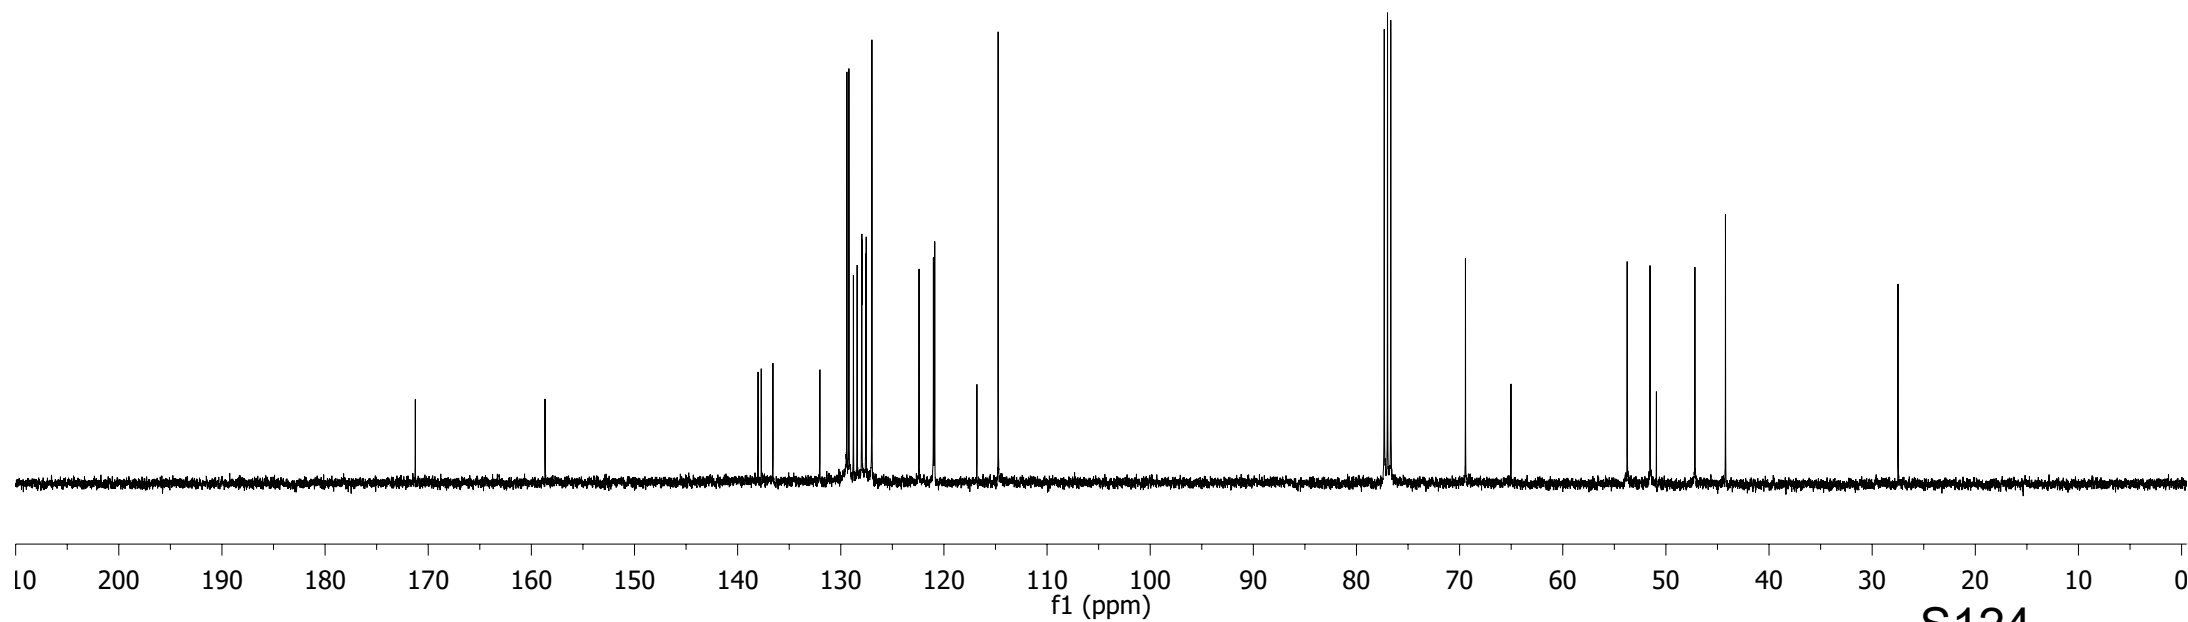

S124

Solvent  $\text{CDCl}_3$   
 Spectrometer Frequency 400

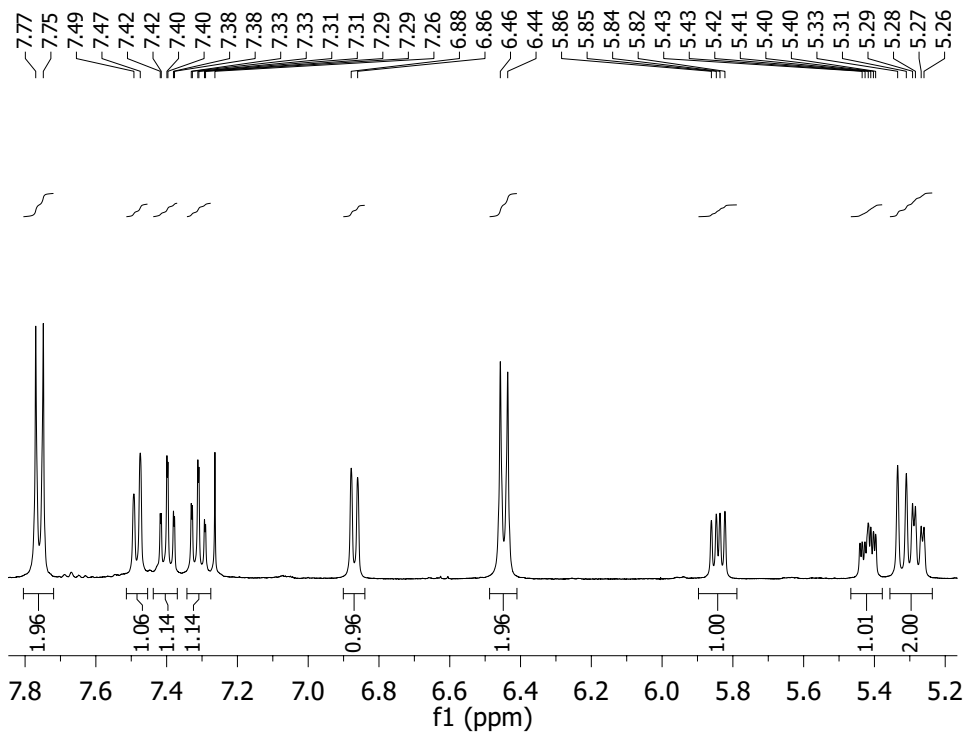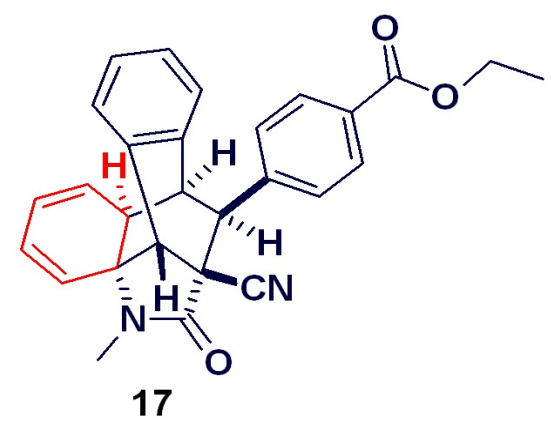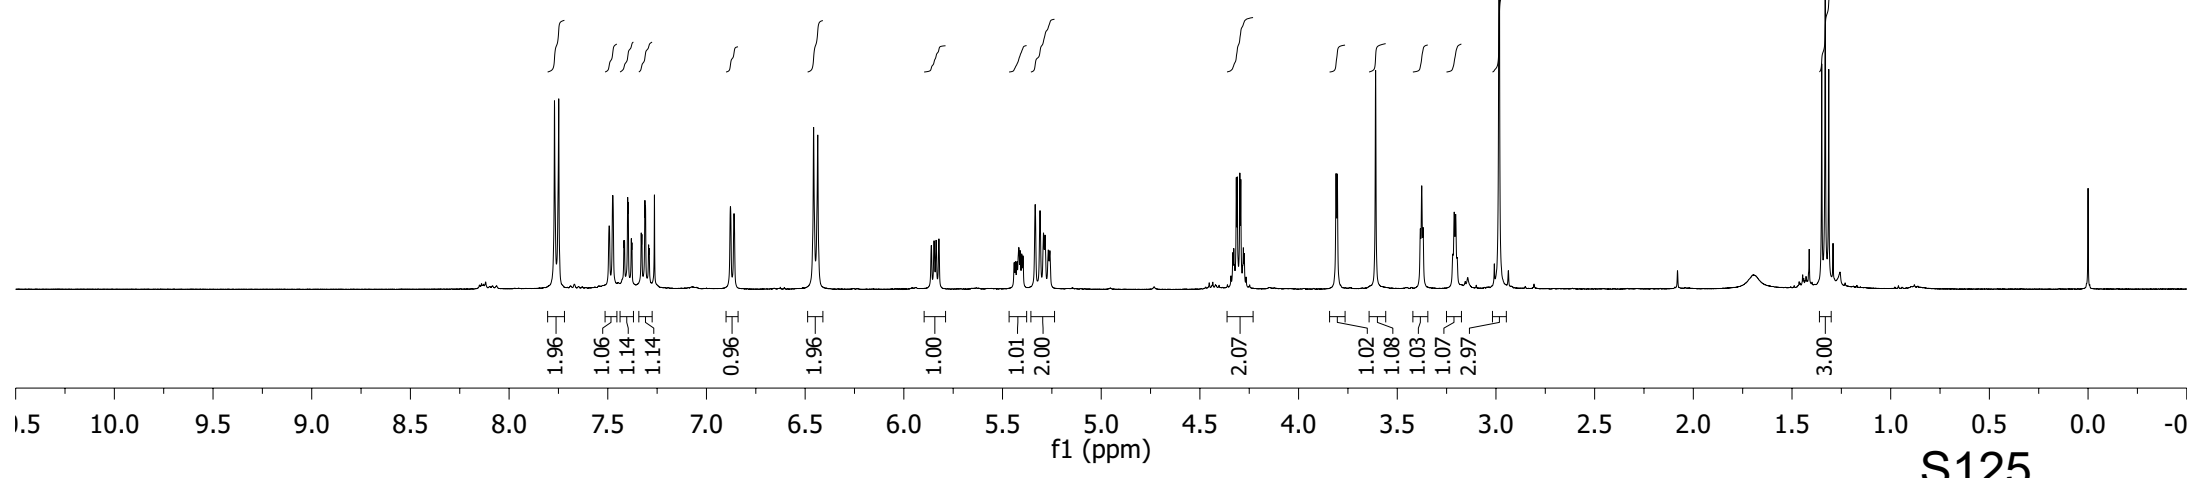

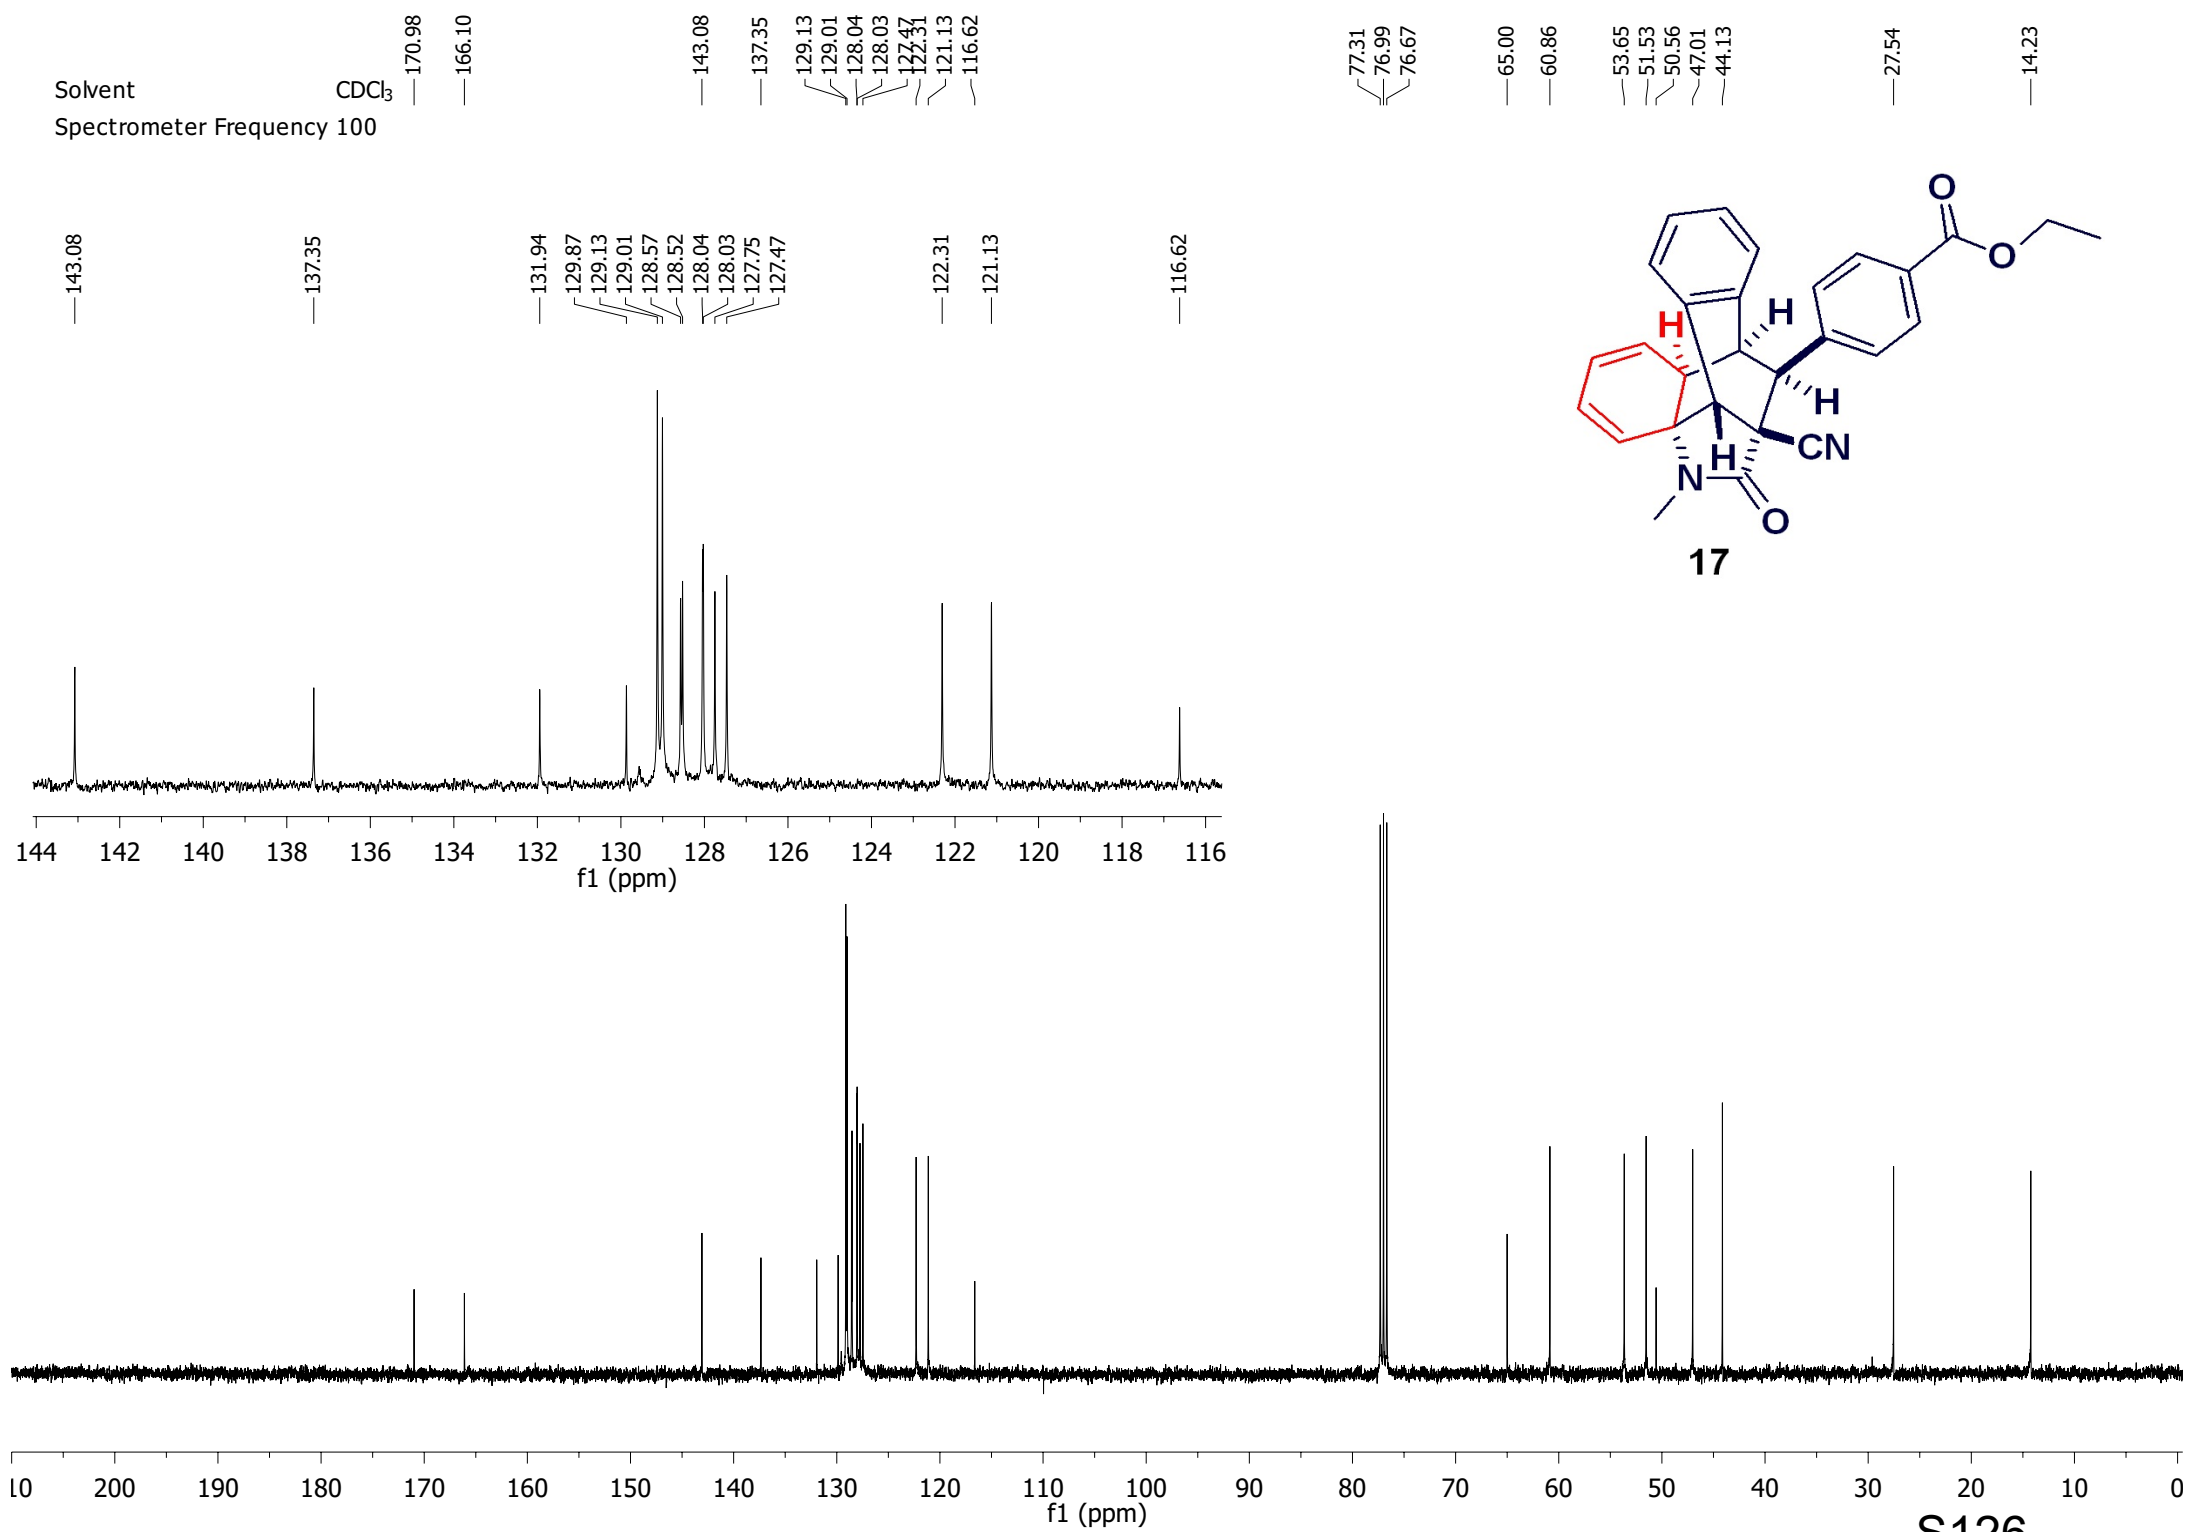

Solvent  $\text{CDCl}_3$   
Spectrometer Frequency 400

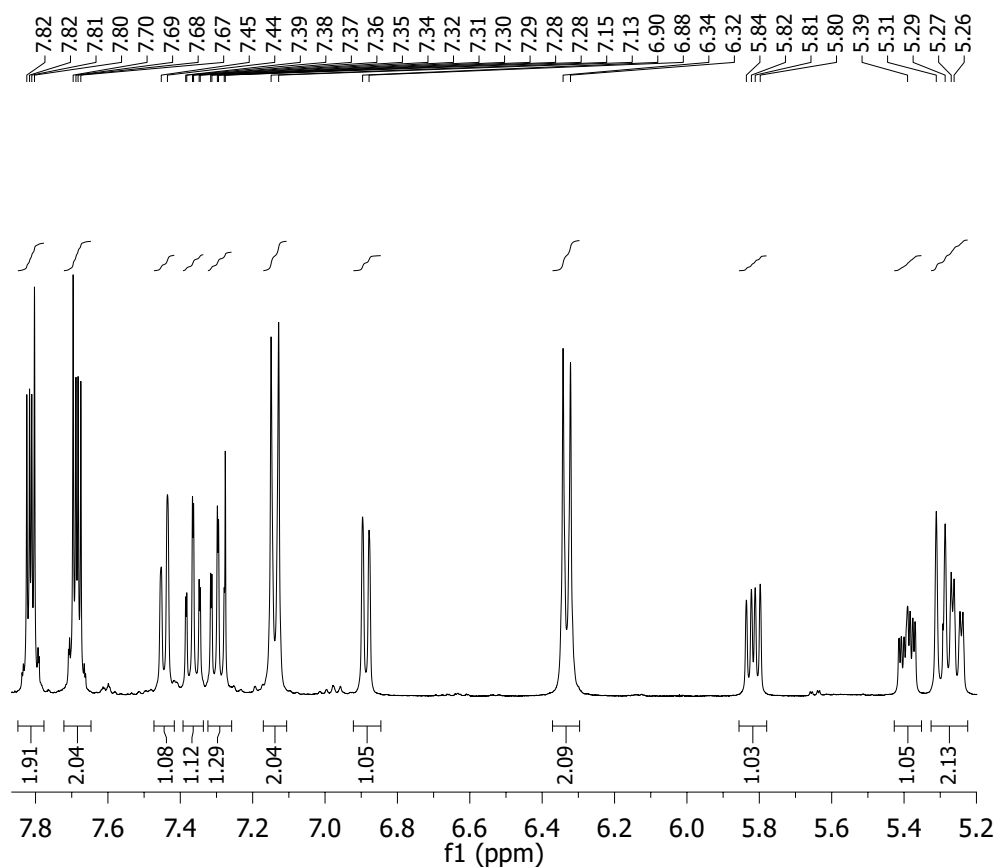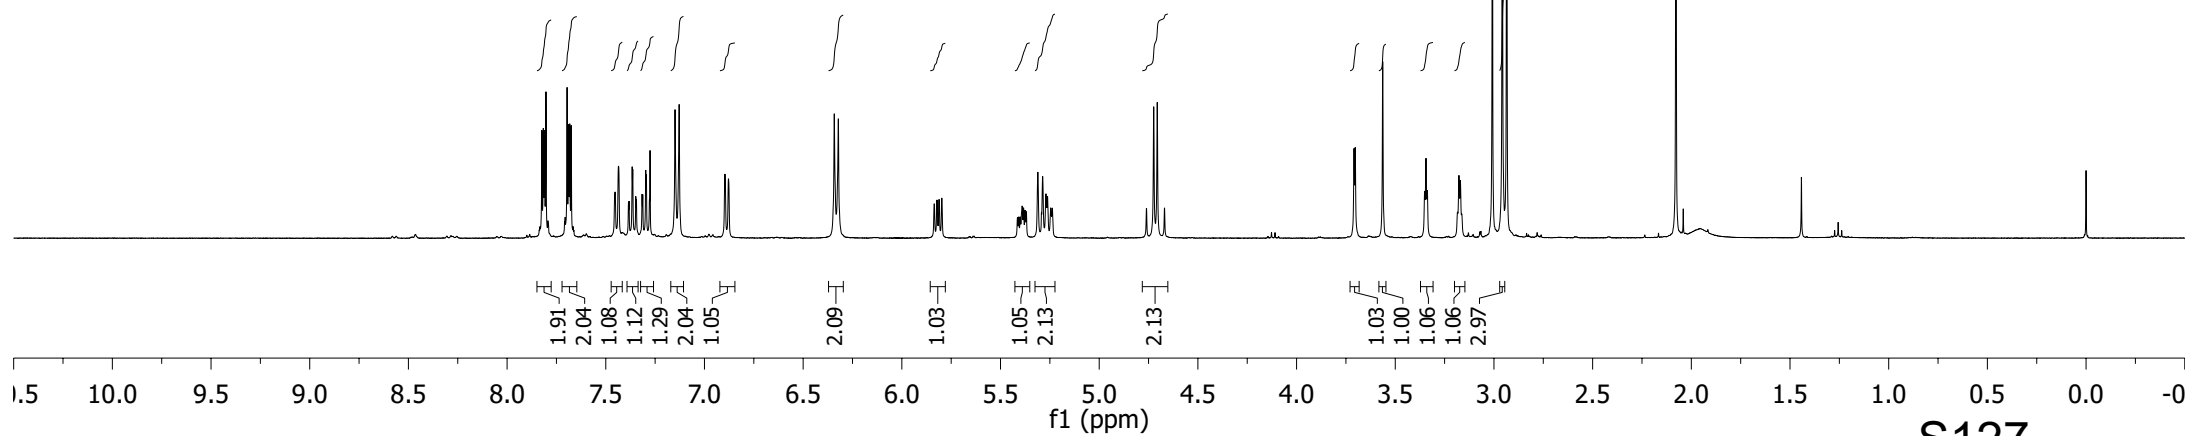

Solvent  $\text{CDCl}_3$   
Spectrometer Frequency 100

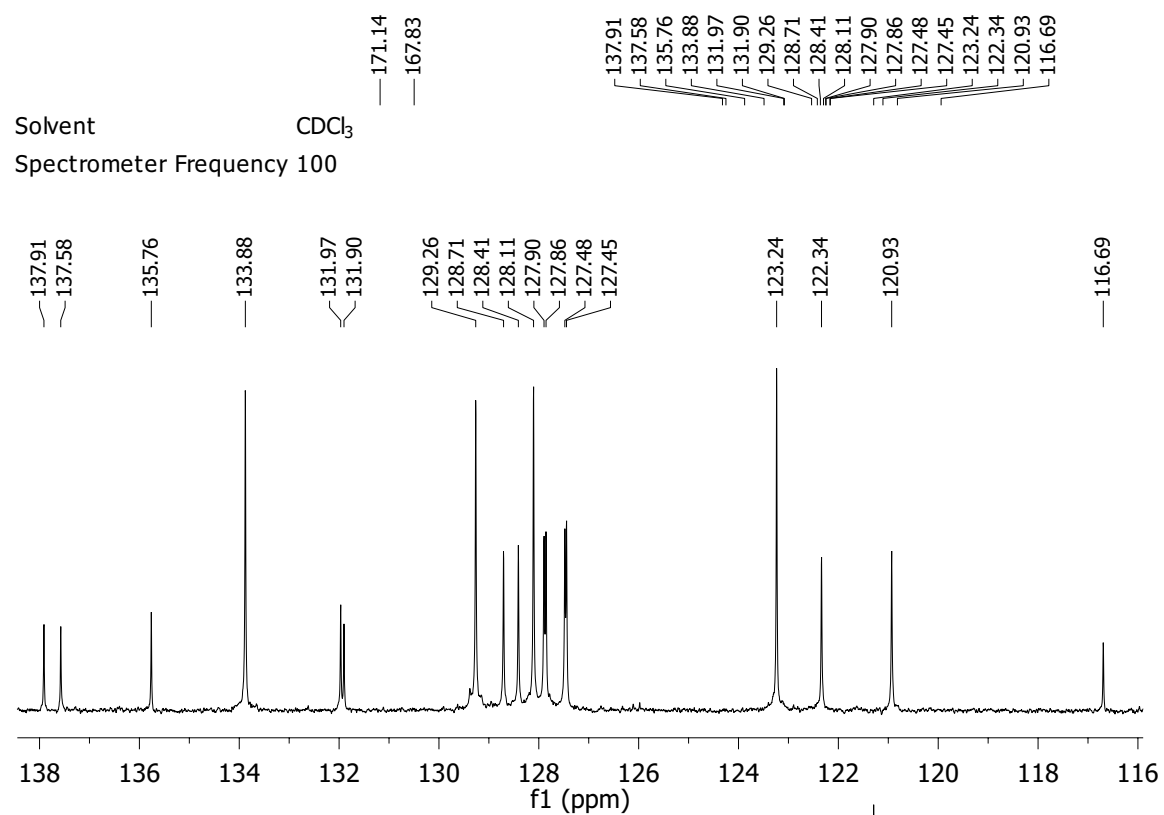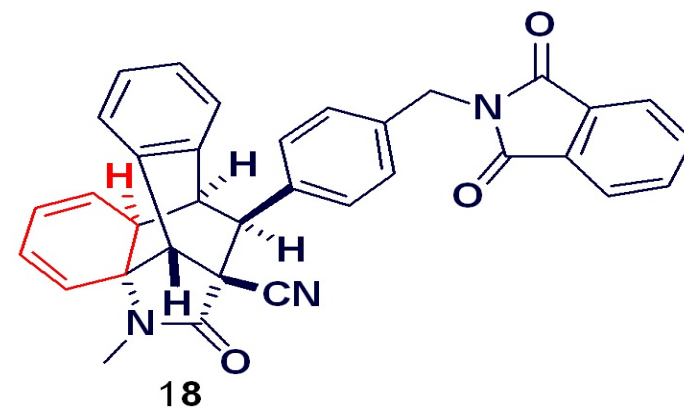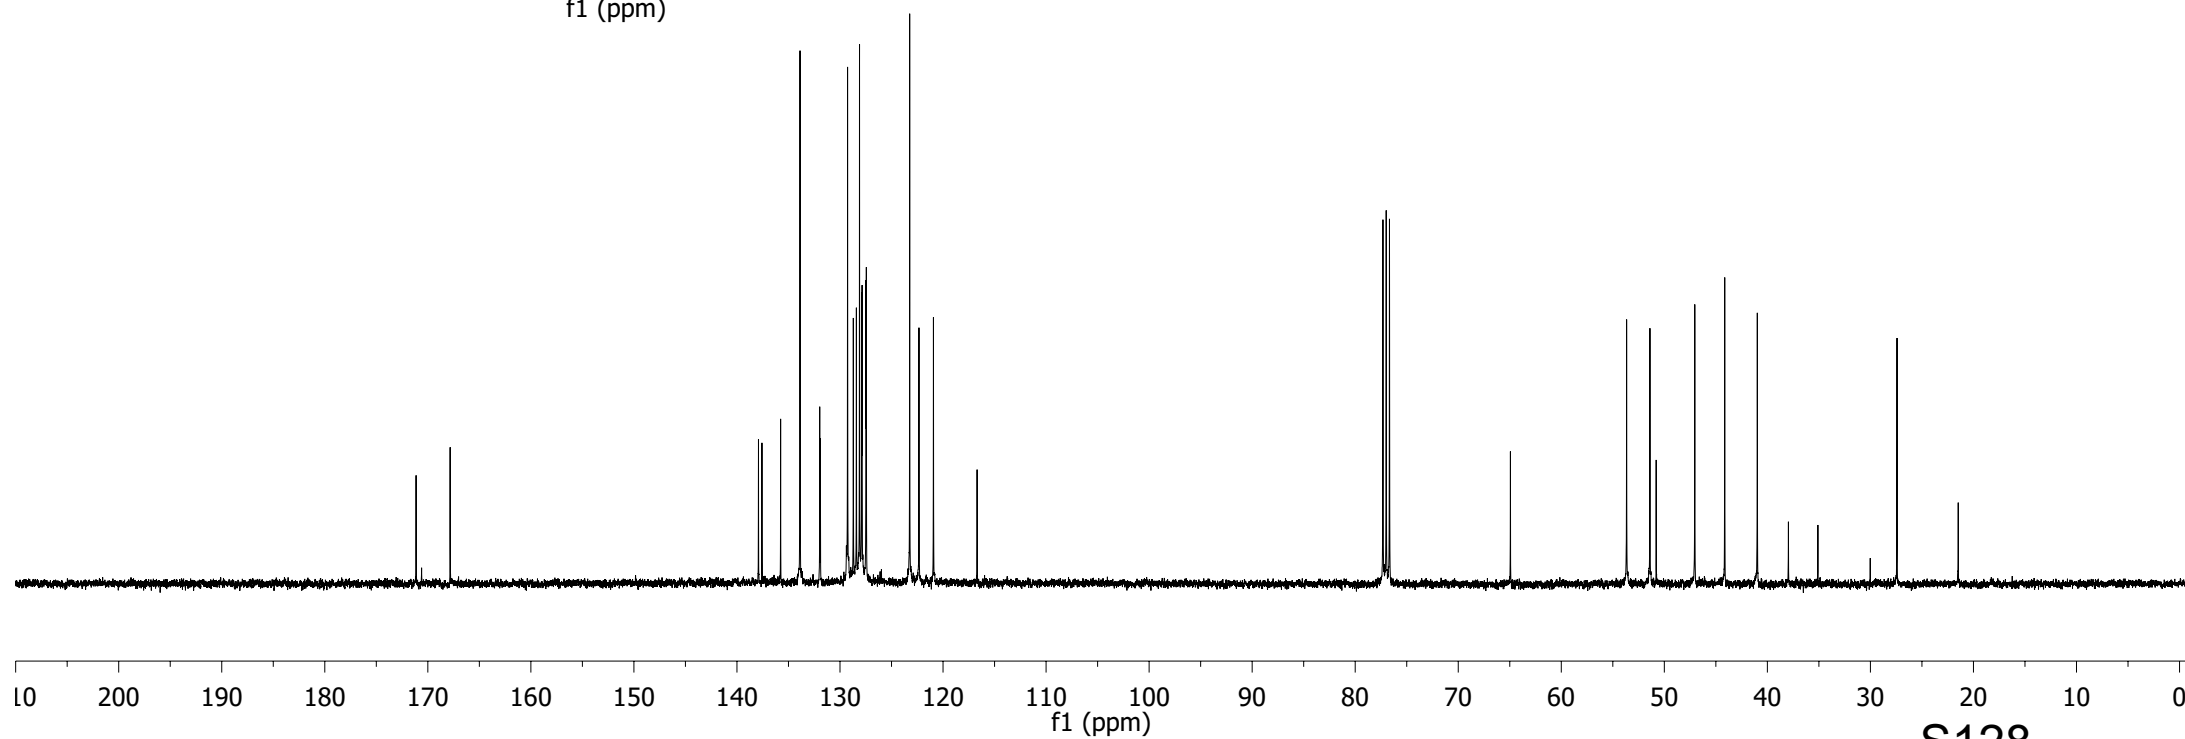

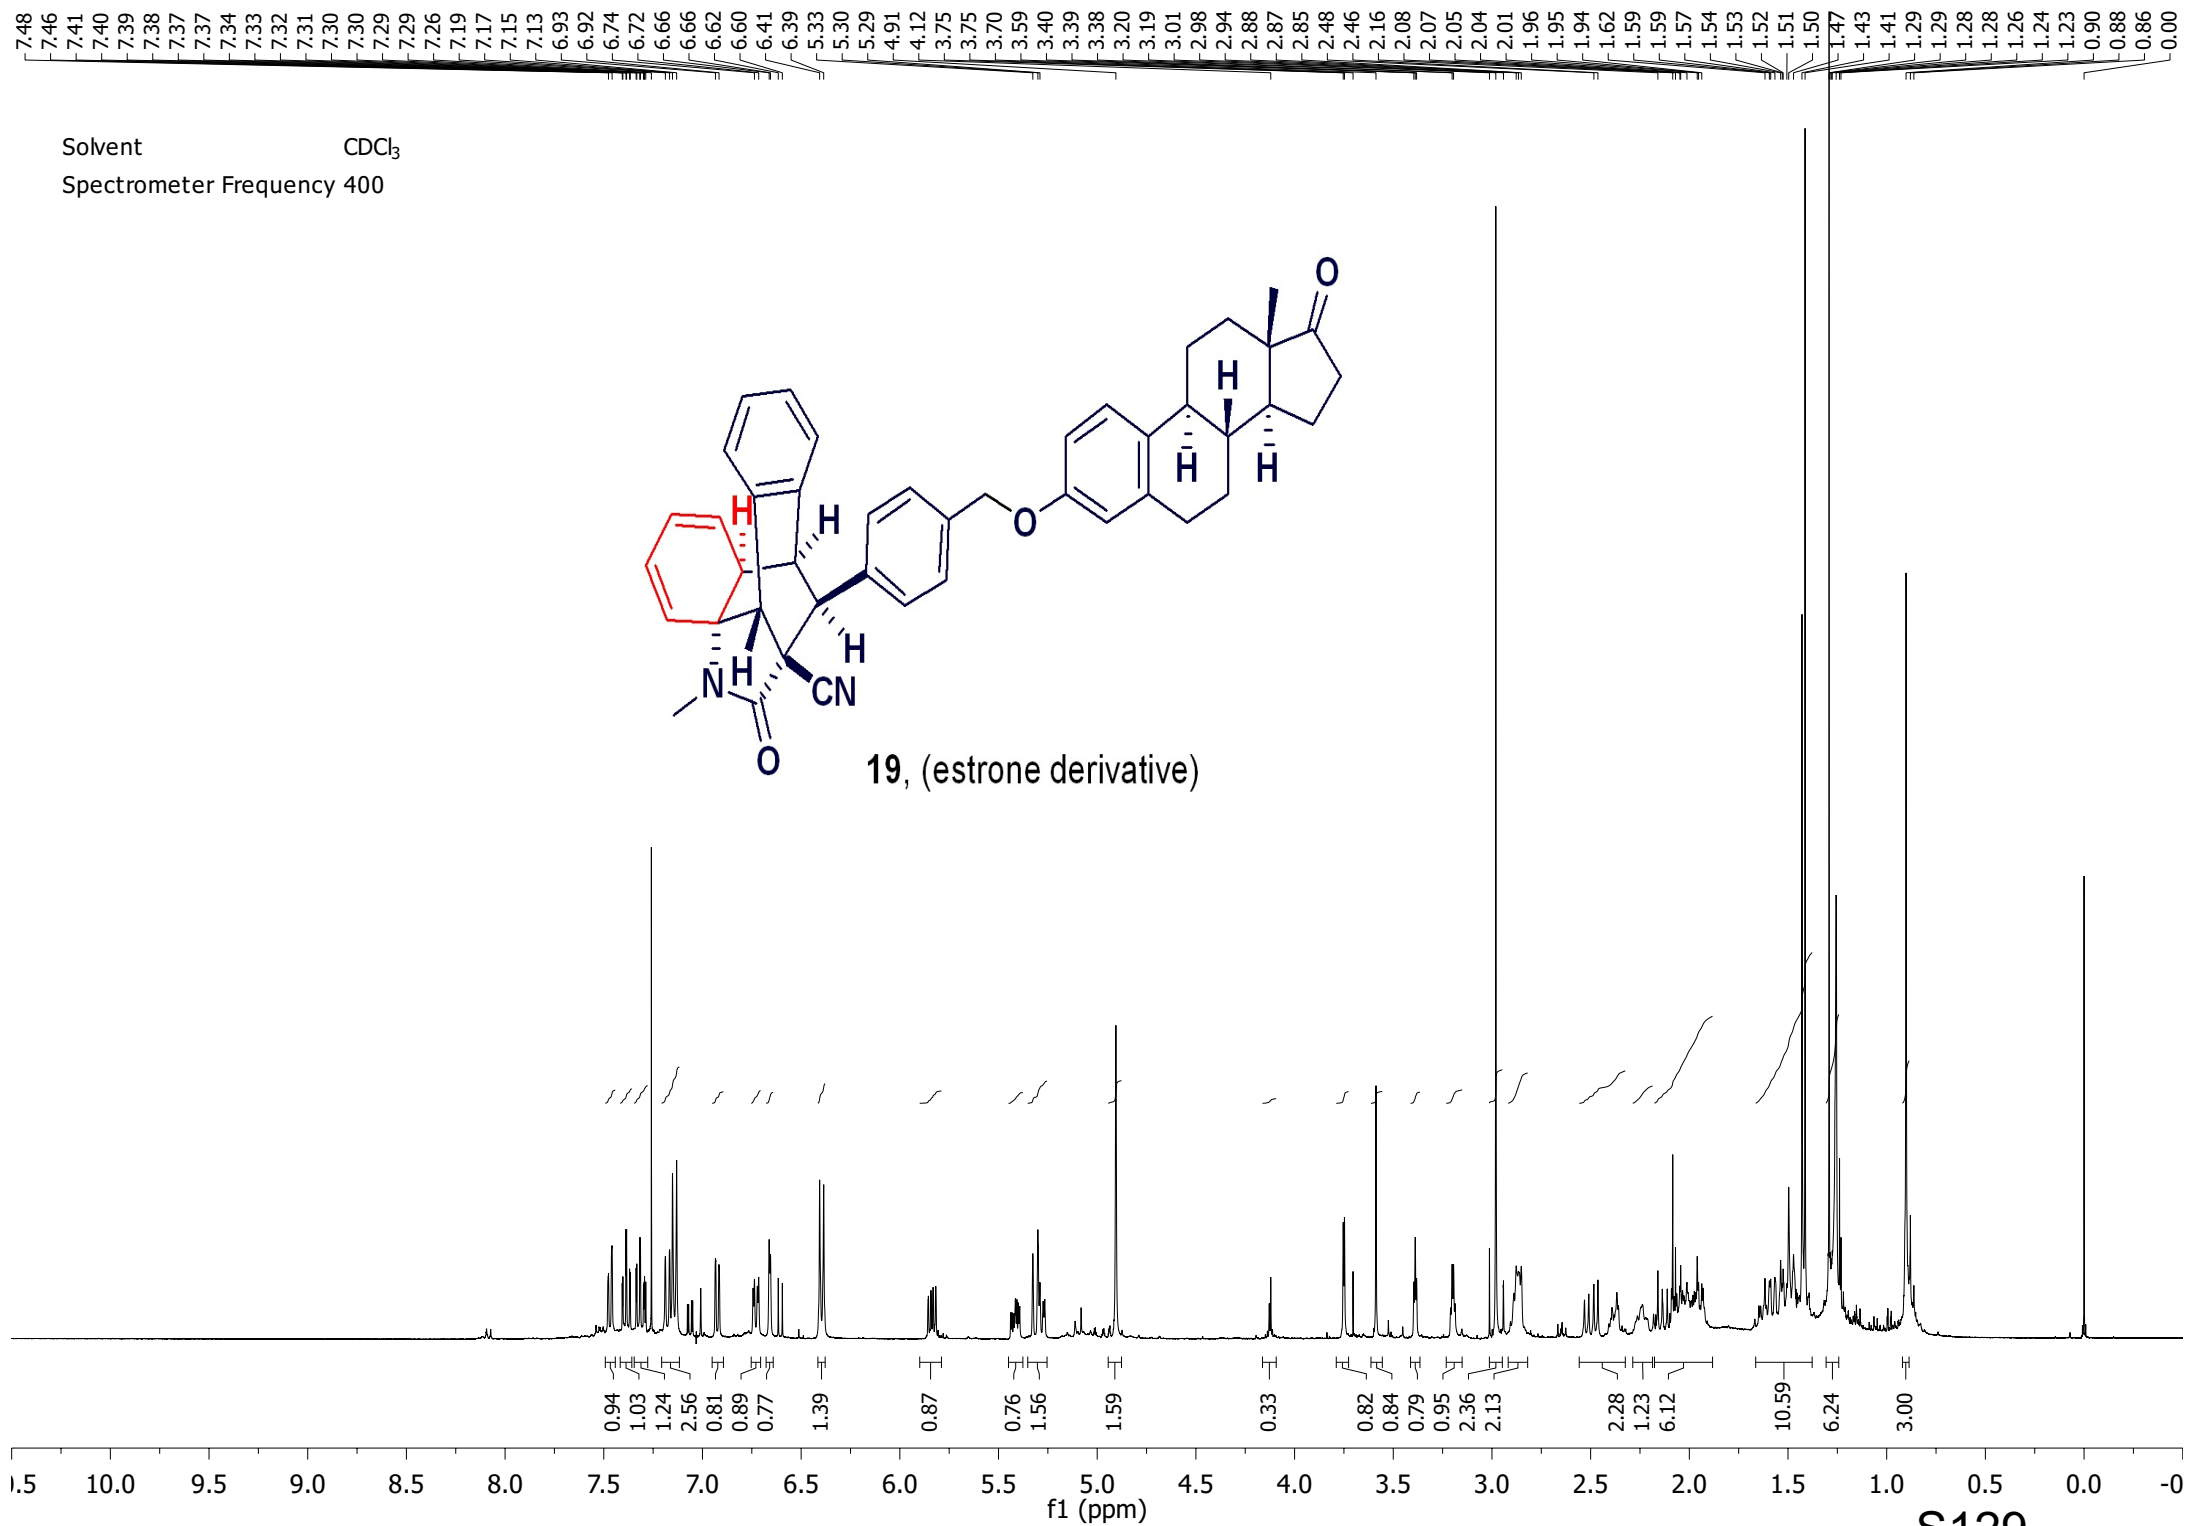

Solvent

CDCl<sub>3</sub>

Spectrometer Frequency 100

171.29

156.75

137.94

137.74

137.72

136.79

132.28

132.02

129.20

128.78

128.42

127.99

127.96

127.58

127.54

126.93

126.29

124.74

123.97

123.44

122.41

121.03

116.78

115.85

114.75

112.38

77.31

76.99

76.67

69.50

65.04

53.77

51.55

50.94

50.38

47.99

47.21

44.24

43.95

38.29

35.85

31.59

31.54

29.62

29.59

26.49

25.86

21.55

14.09

13.82

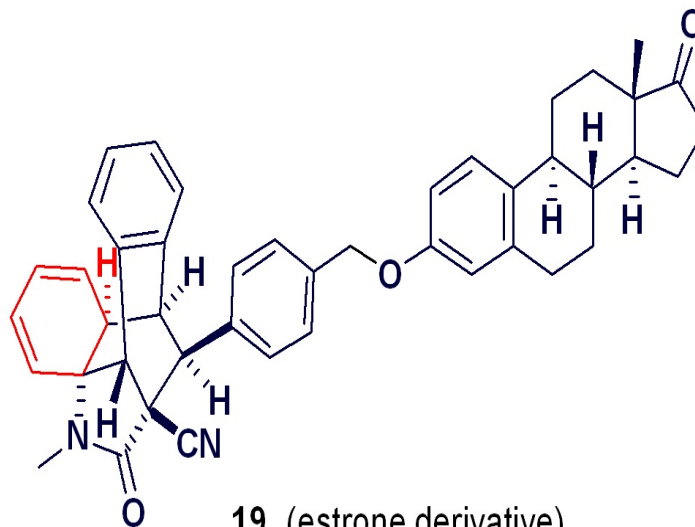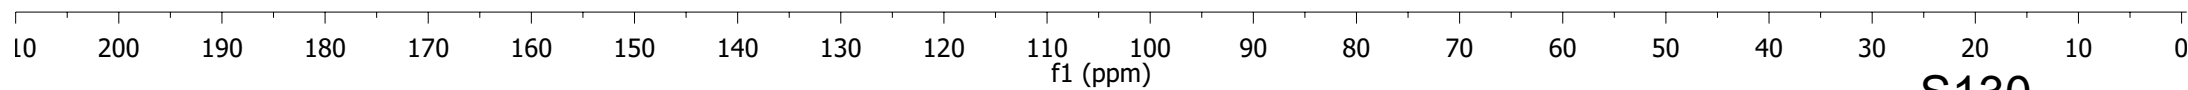

S130

Solvent  $\text{CDCl}_3$   
Spectrometer Frequency 400

7.94 7.92 7.50 7.42 7.40 7.38 7.26 7.16 7.16 7.14 6.53 6.51 5.88 5.86 5.85 5.84 5.44 5.43 5.42 5.35 5.33 5.31 5.31 5.29 5.28 3.85 3.63 3.42 3.41 3.41 3.24 3.24 3.23 3.01 3.00 2.94 2.17 2.08 1.64 0.00

7.94 7.92 7.51 7.50 7.44 7.44 7.42 7.40 7.38 7.36 7.36 7.34 7.34 7.32 7.27 7.26 7.25 7.23 7.16 7.16 7.14 6.92 6.90 6.53 6.51 5.88 5.86 5.85 5.84 5.45 5.44 5.43 5.42 5.42 5.35 5.33 5.31 5.31 5.29 5.28

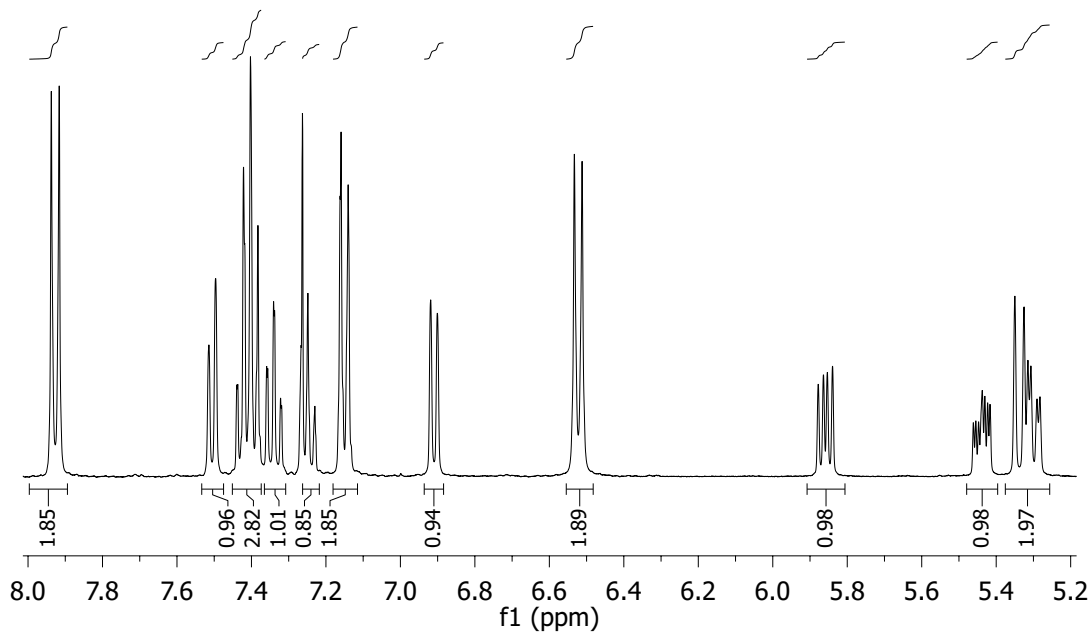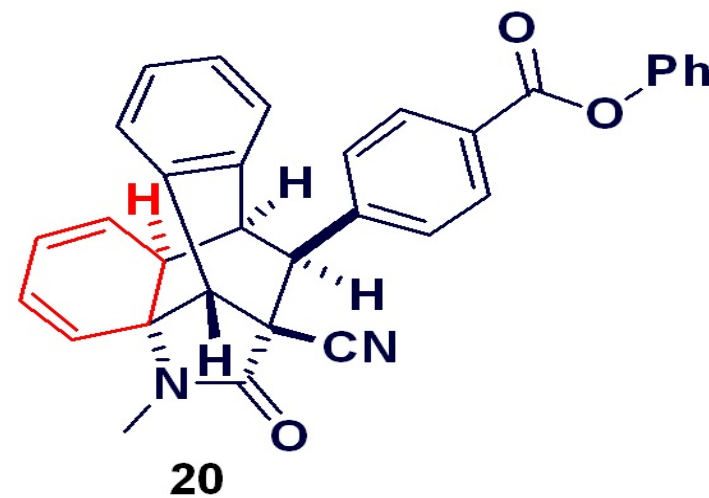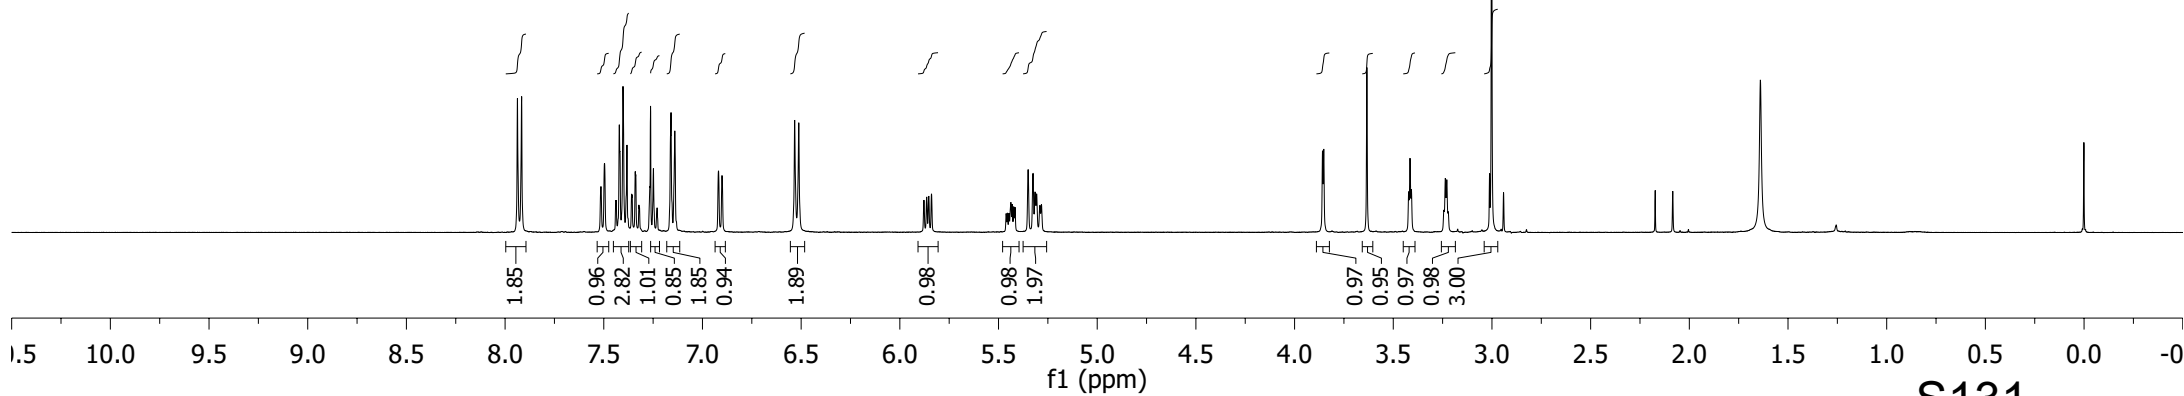

Solvent  $\text{CDCl}_3$   
Spectrometer Frequency 100

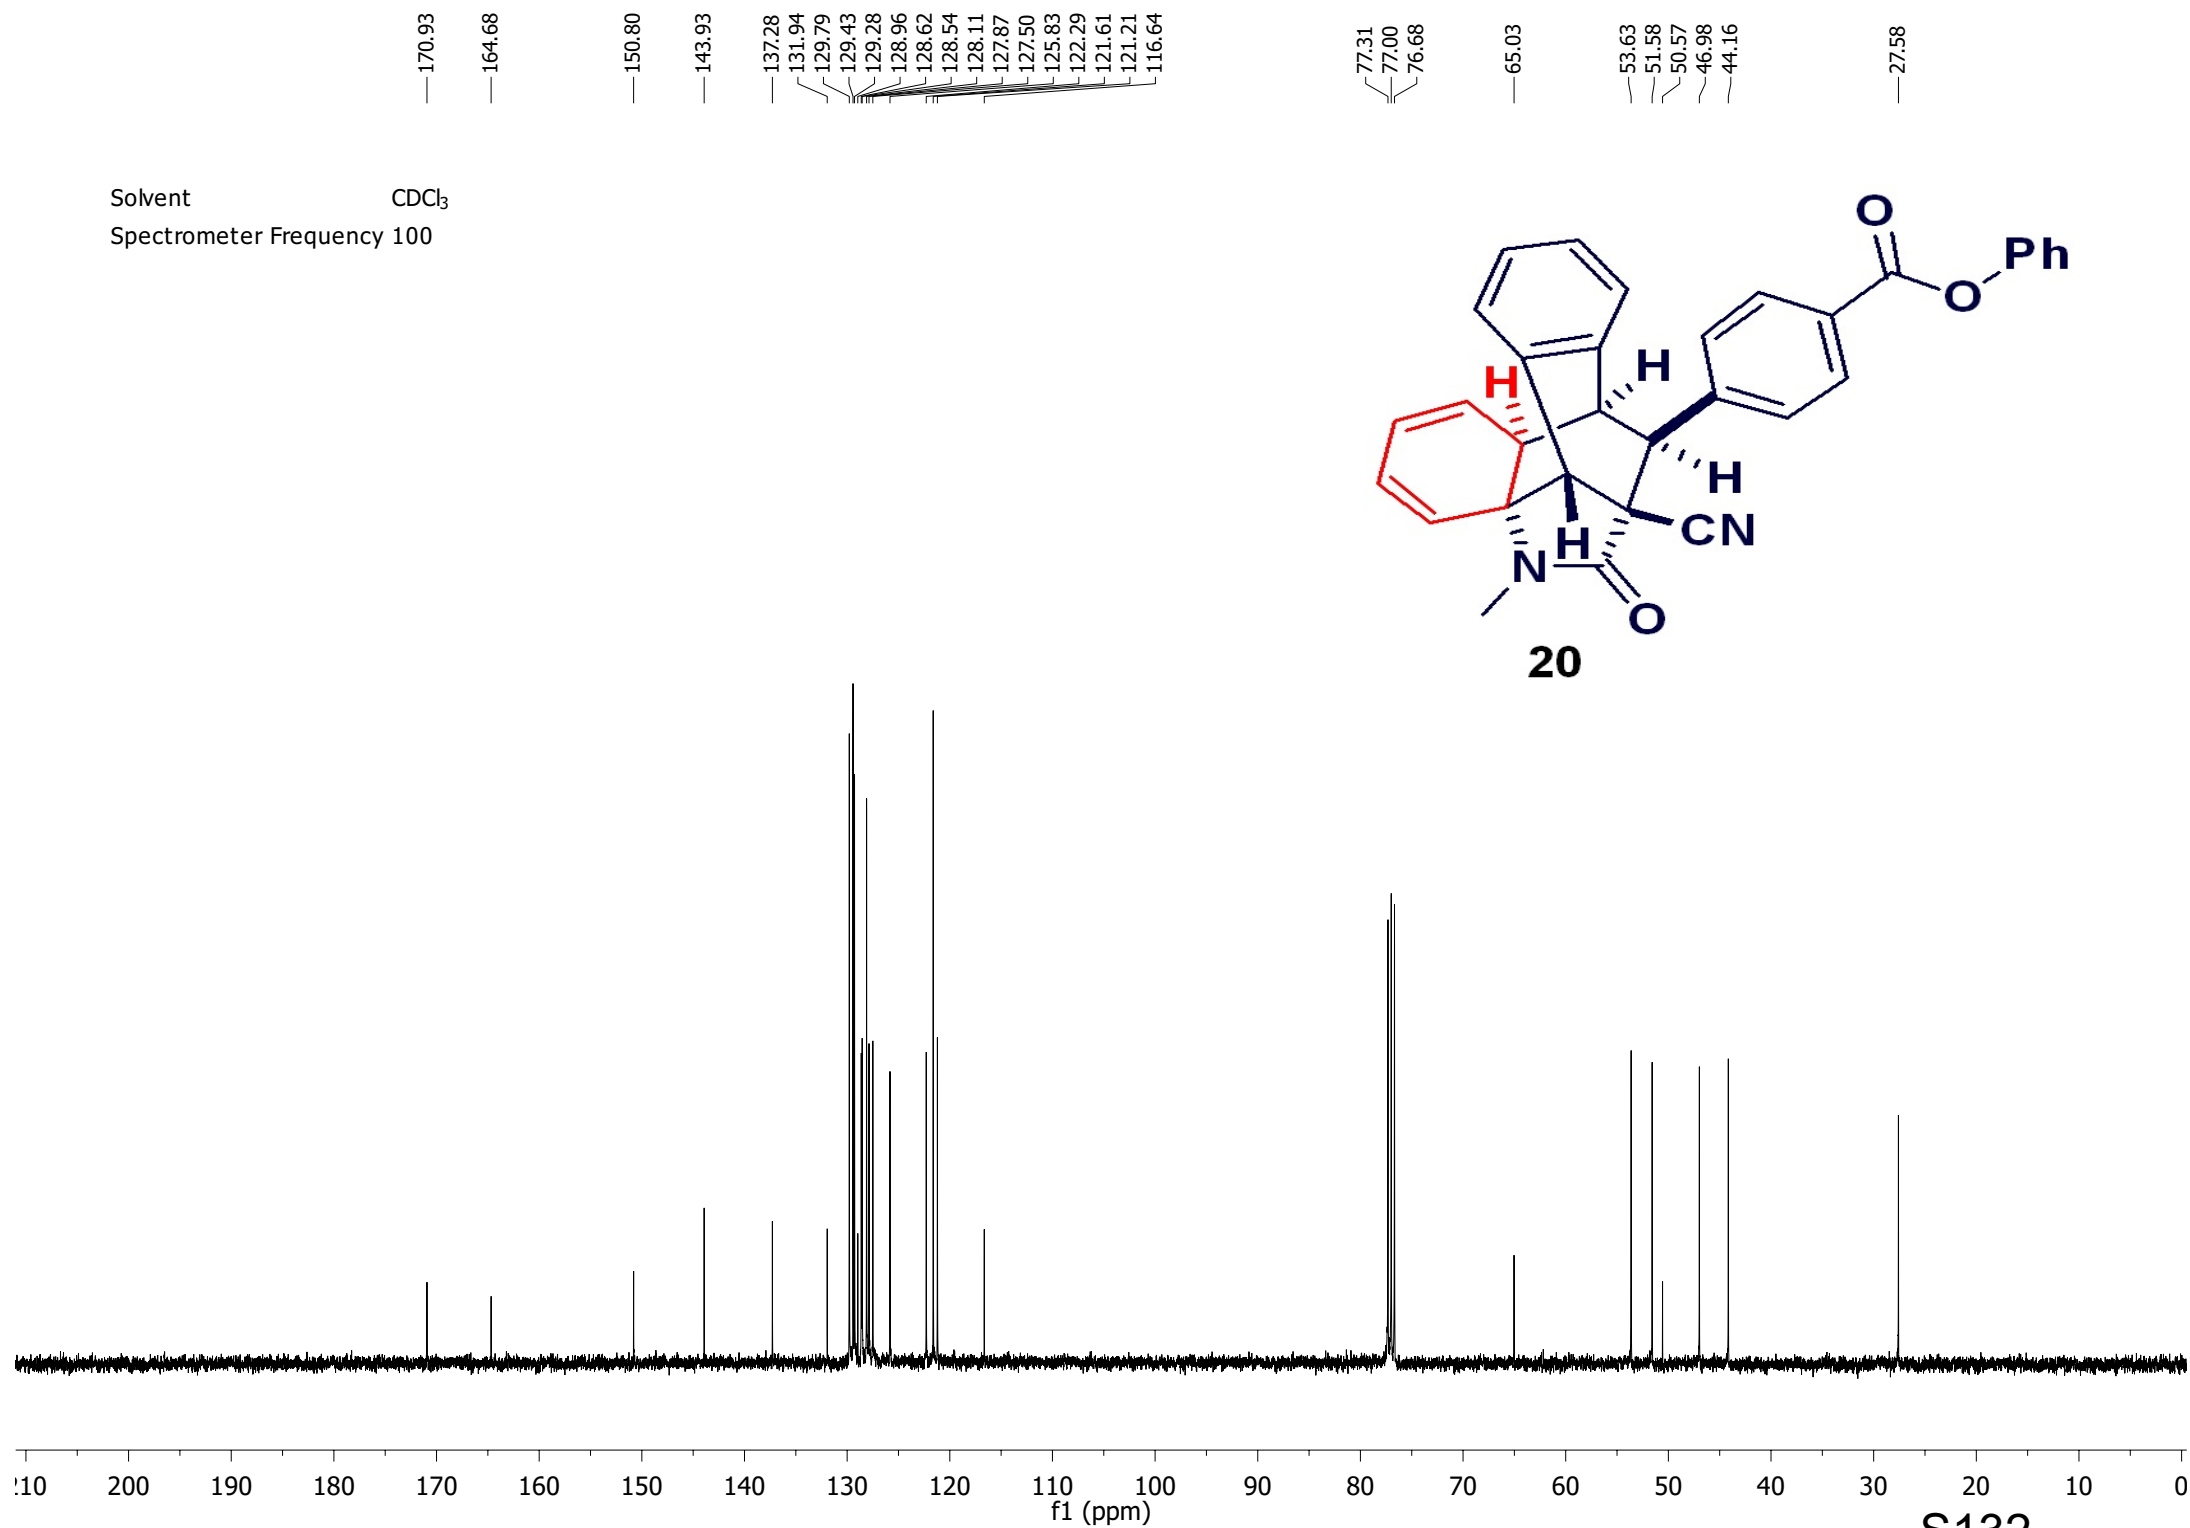

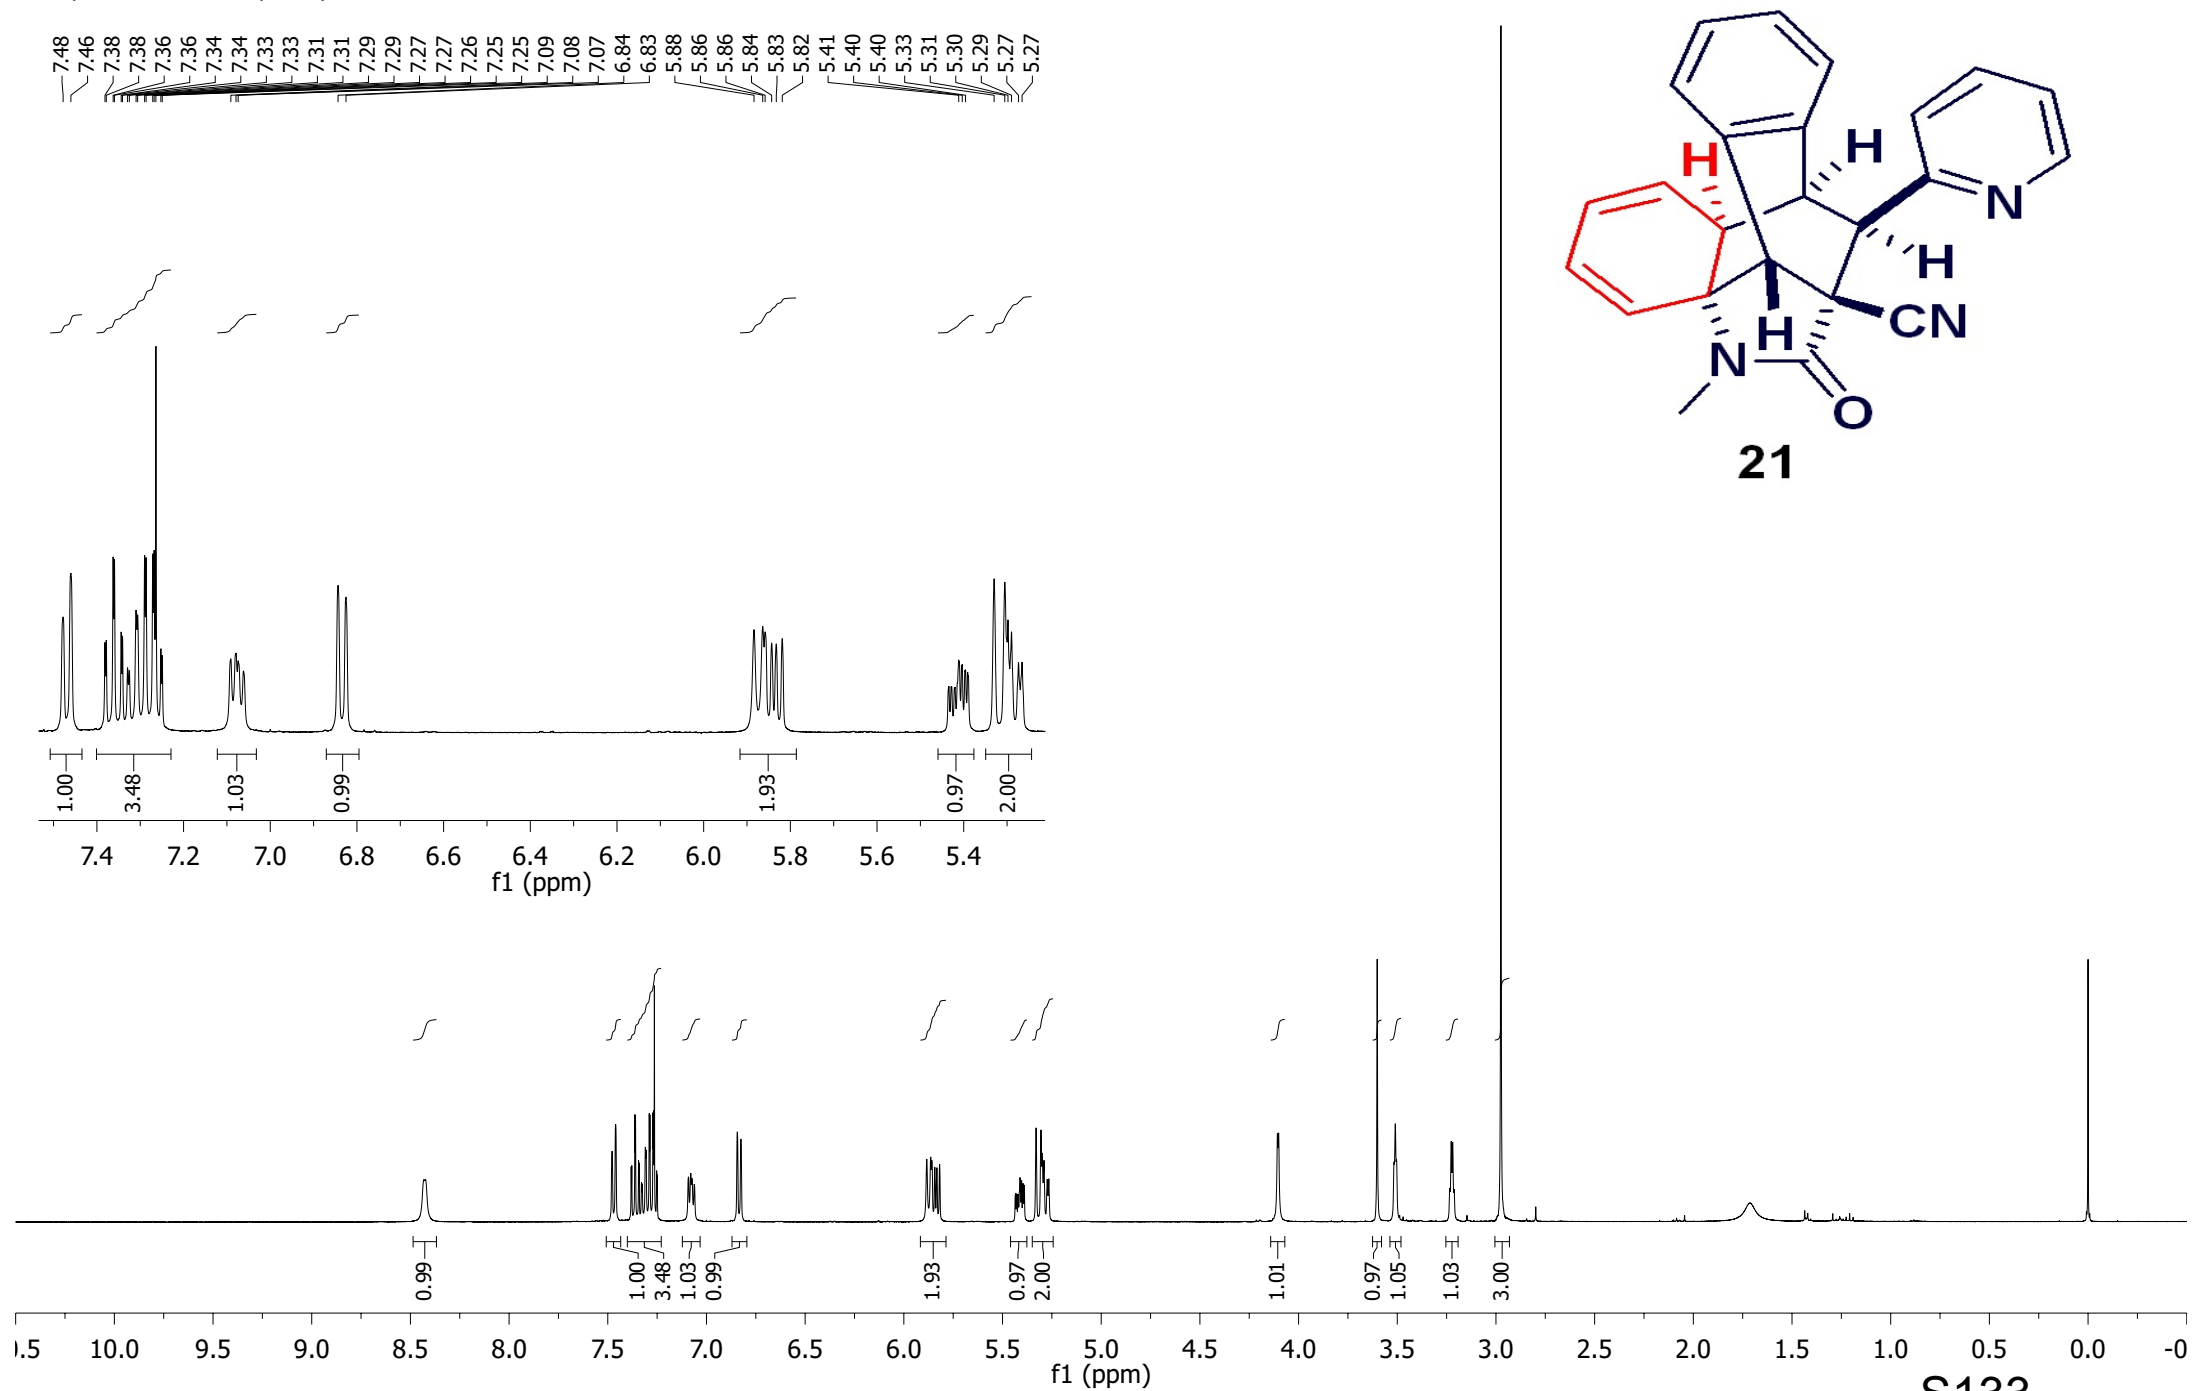

Solvent  $\text{CDCl}_3$   
Spectrometer Frequency 100

170.82  
157.45  
148.84  
137.60  
135.54  
132.03  
128.81  
128.28  
128.00  
127.90  
127.51  
127.13  
123.10  
122.61  
122.44  
121.04  
116.96

77.31  
76.99  
76.67

65.02

53.80  
53.40  
49.44  
46.04  
43.79

27.53

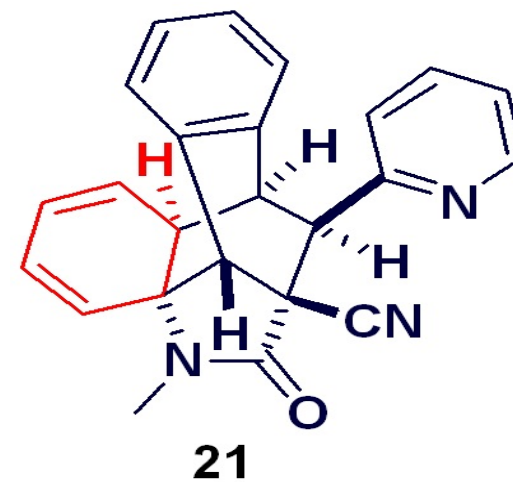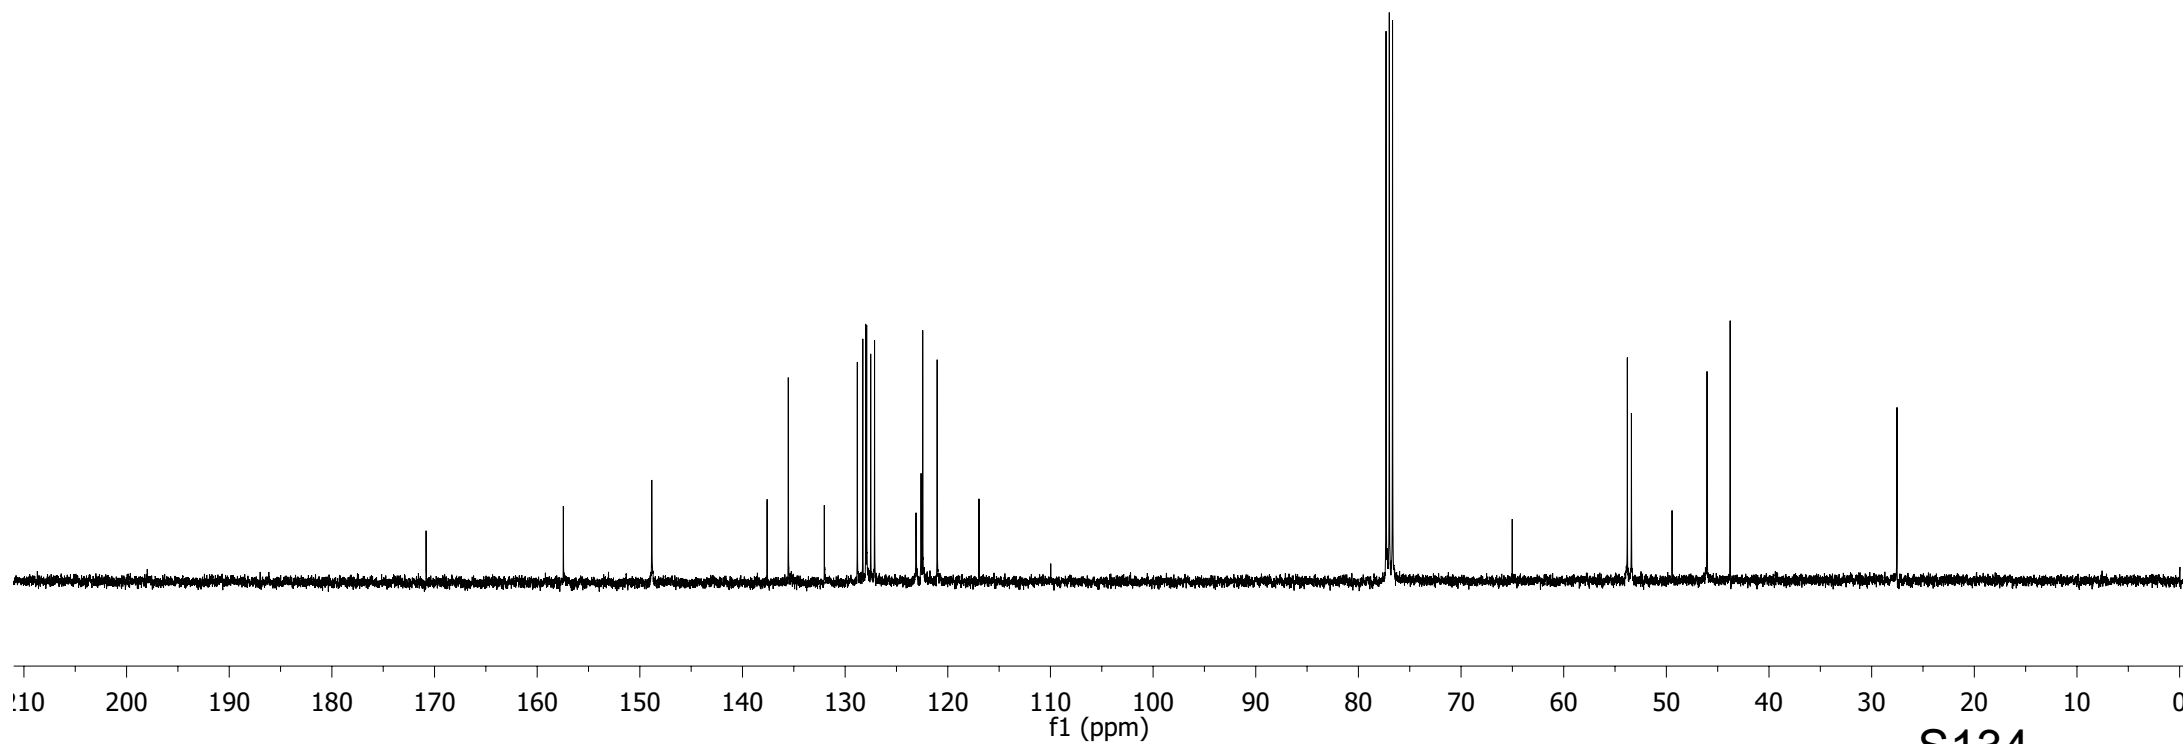

S134

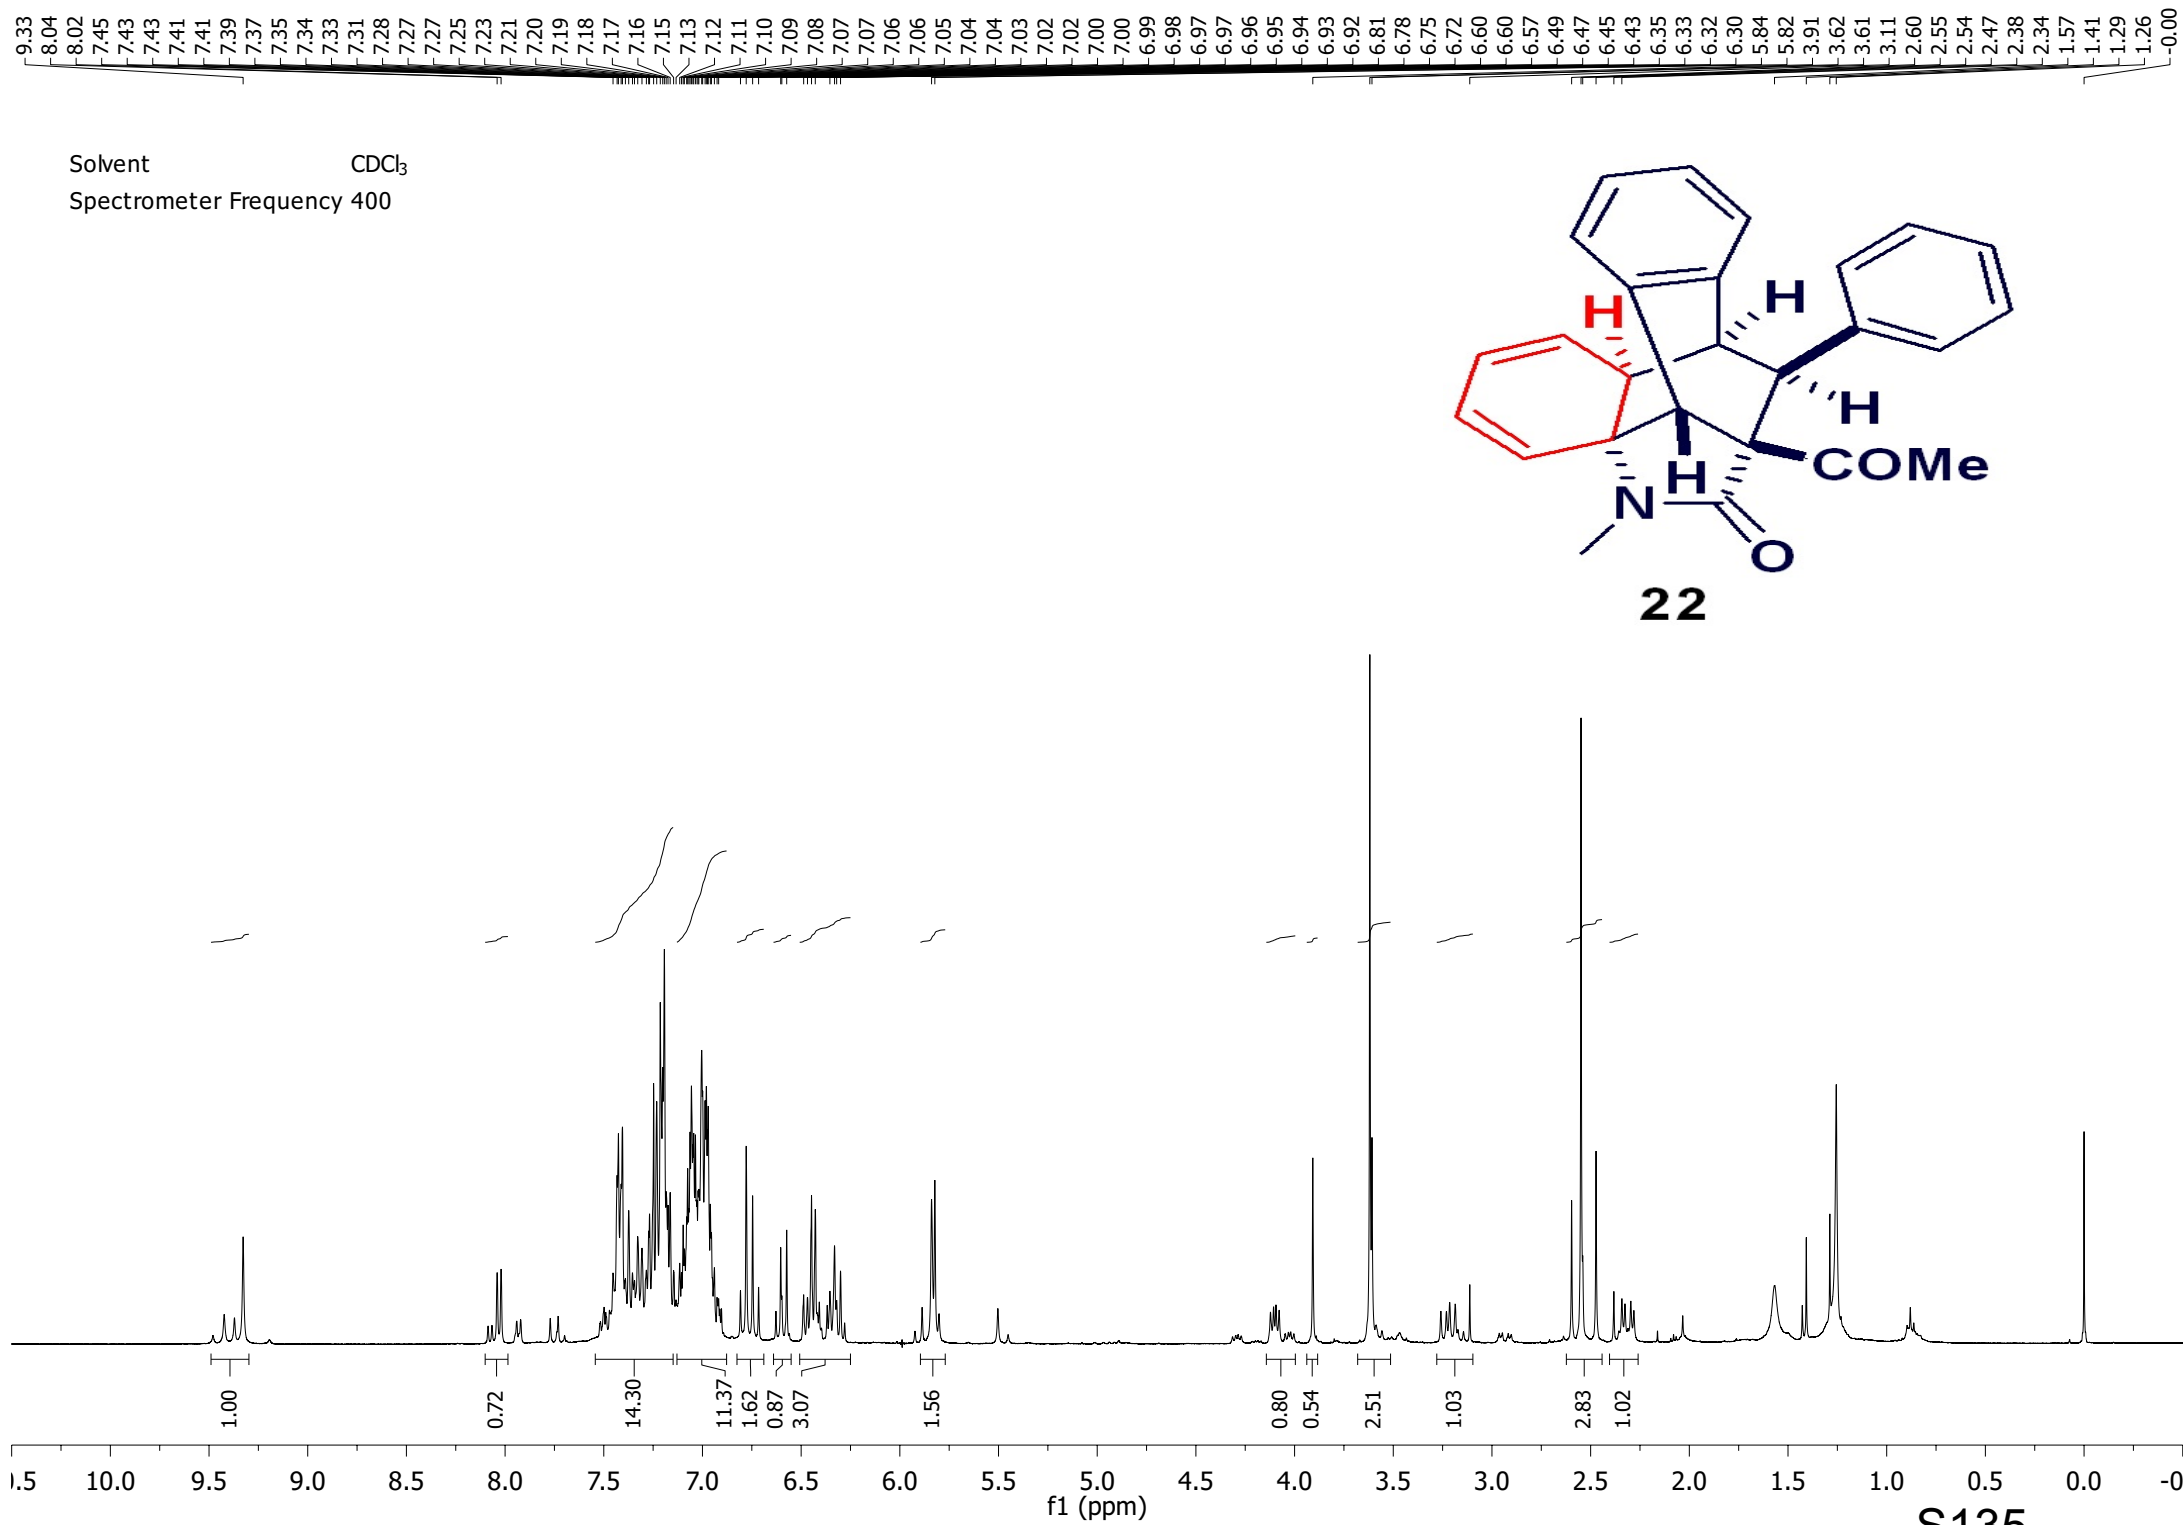

Solvent  $\text{CDCl}_3$   
Spectrometer Frequency 100

— 169.14  
— 162.79  
— 160.68  
— 131.79  
— 129.88  
— 129.27  
— 129.00  
— 128.81  
— 128.73  
— 128.66  
— 128.47  
— 128.22  
— 127.67  
— 127.61  
— 127.49  
— 127.44  
— 120.48  
— 119.45  
— 117.18

77.31  
76.99  
76.68  
— 65.66  
— 55.27  
— 41.48  
— 38.52  
30.50  
29.67  
29.30

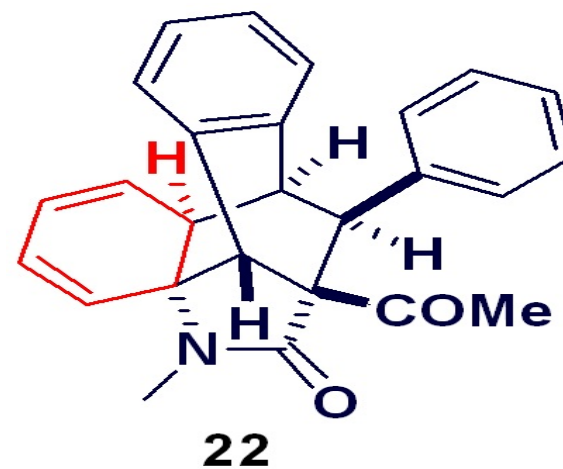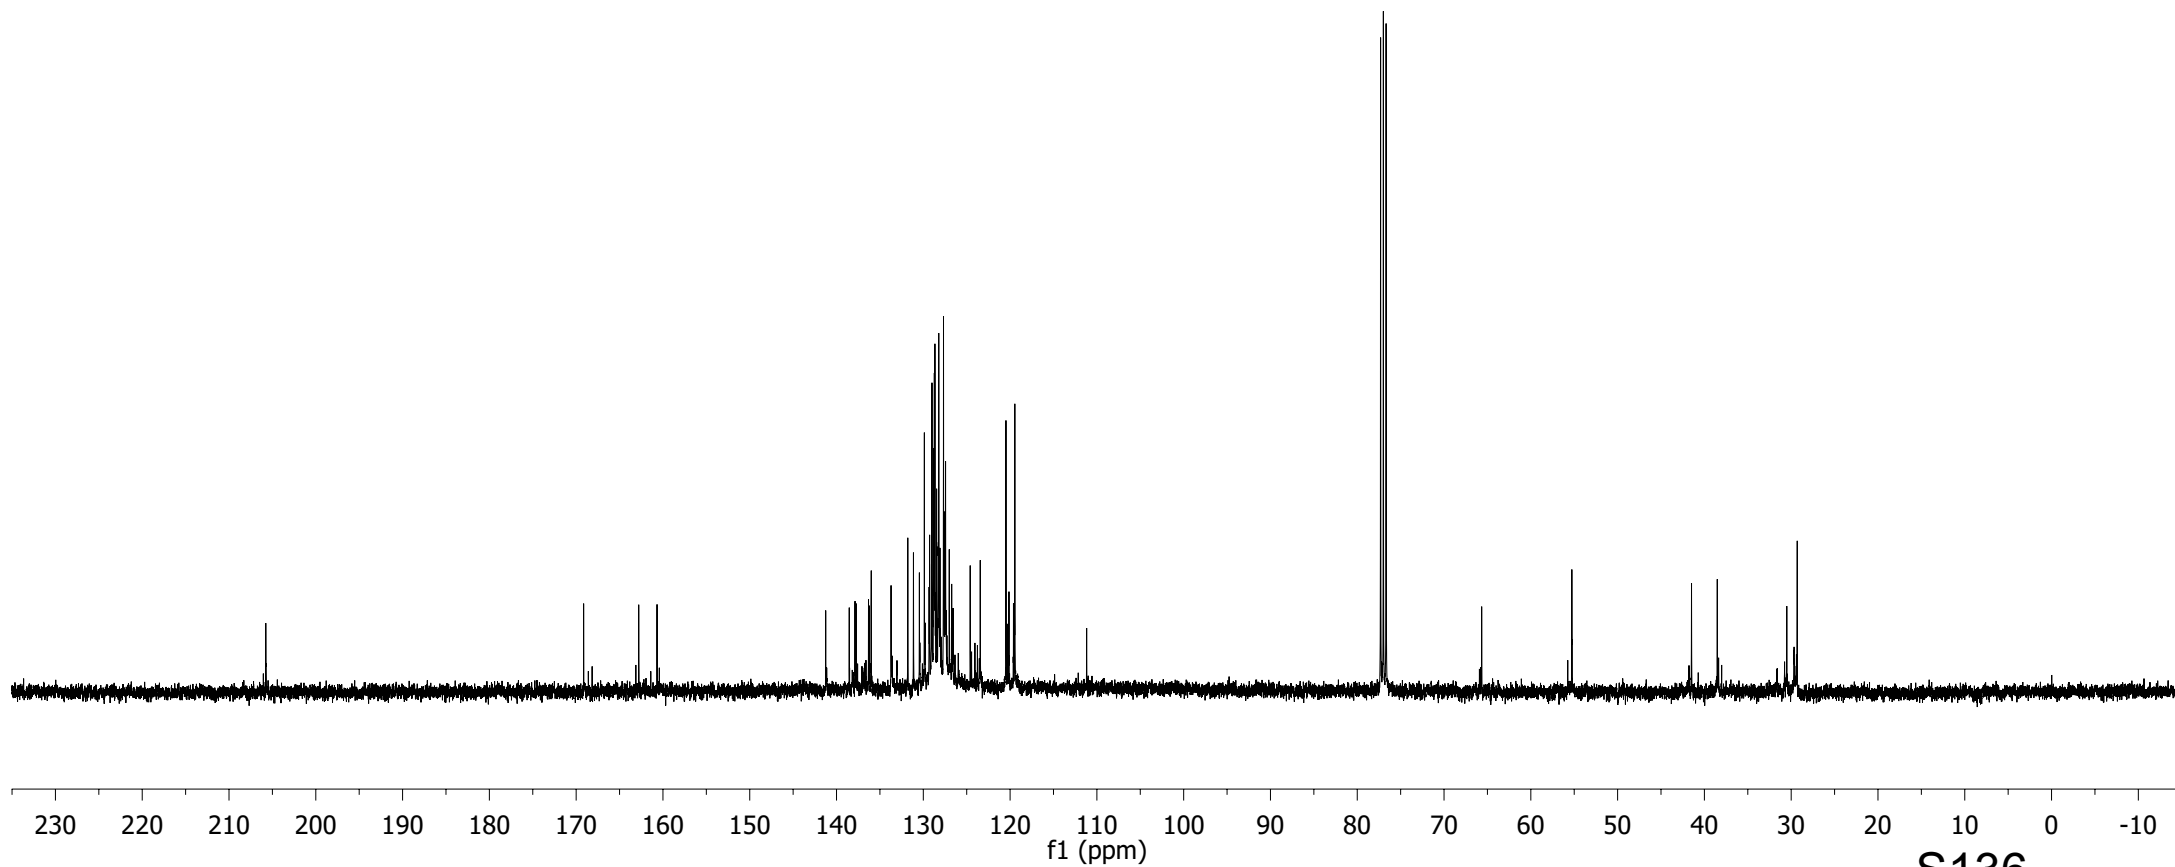

S136

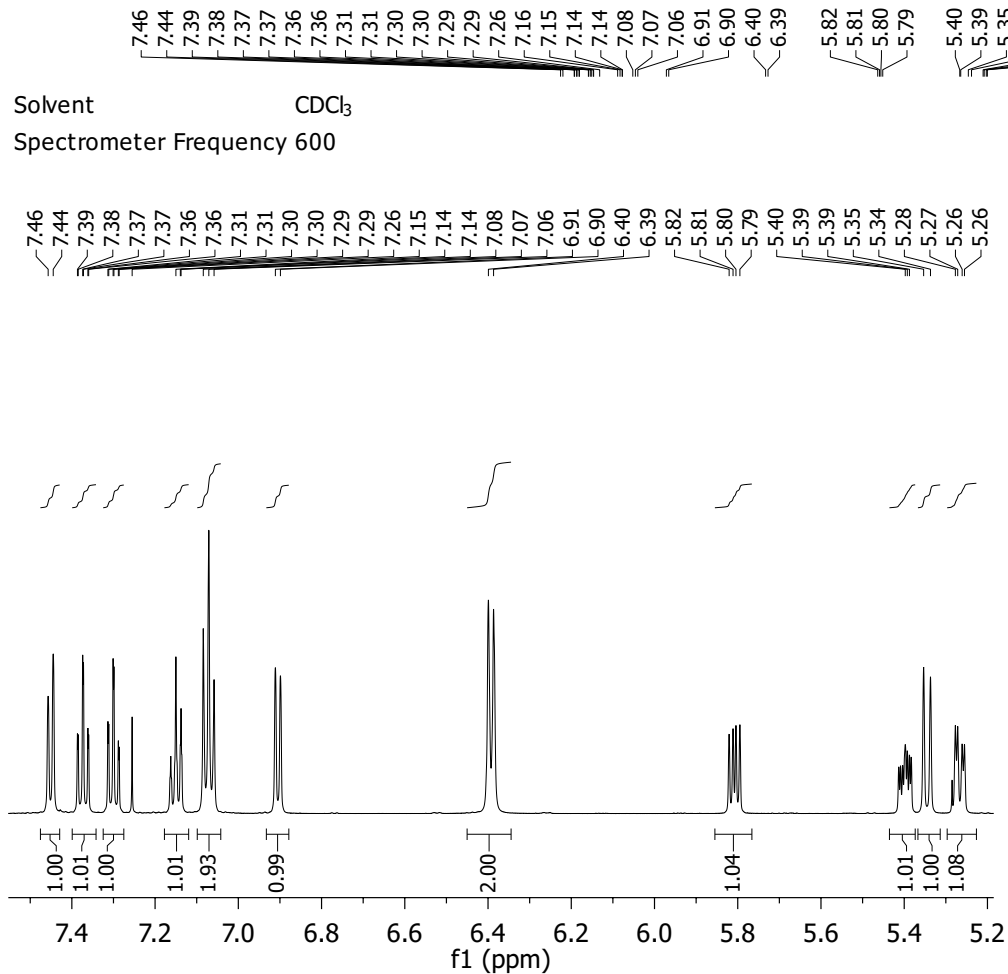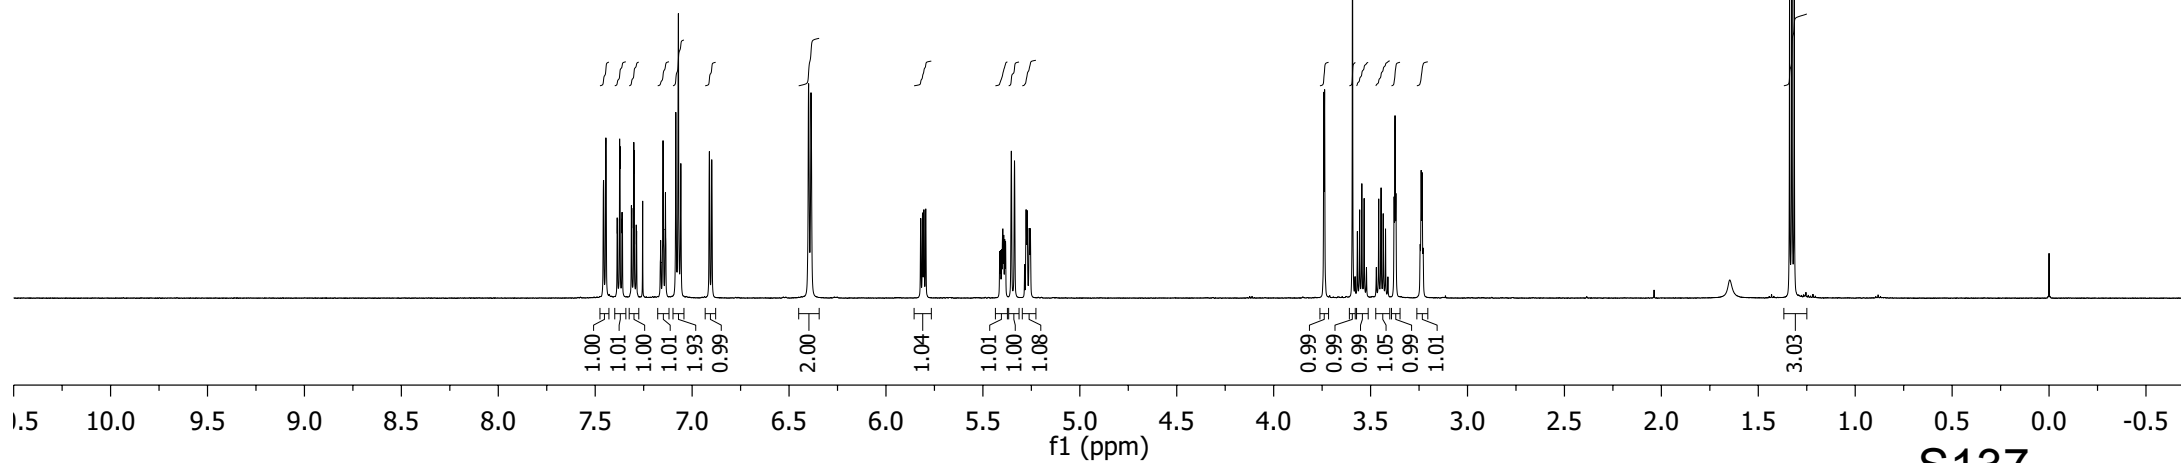

Solvent  
Spectrometer Frequency 150

CDCl<sub>3</sub>

—171.41

138.43

137.76

132.23

129.00

128.65

128.29

127.89

127.86

127.75

127.71

127.47

122.95

120.82

116.97

77.21

76.99

76.78

65.31

54.25

51.74

51.01

47.41

46.56

—37.04

—14.79

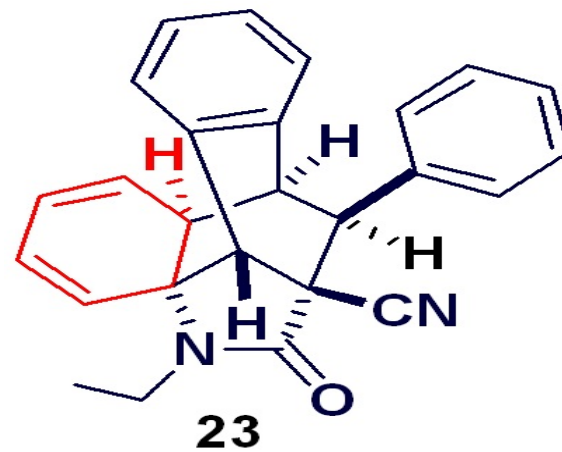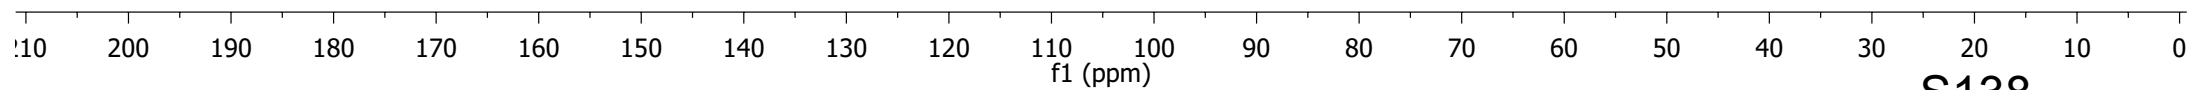

S138

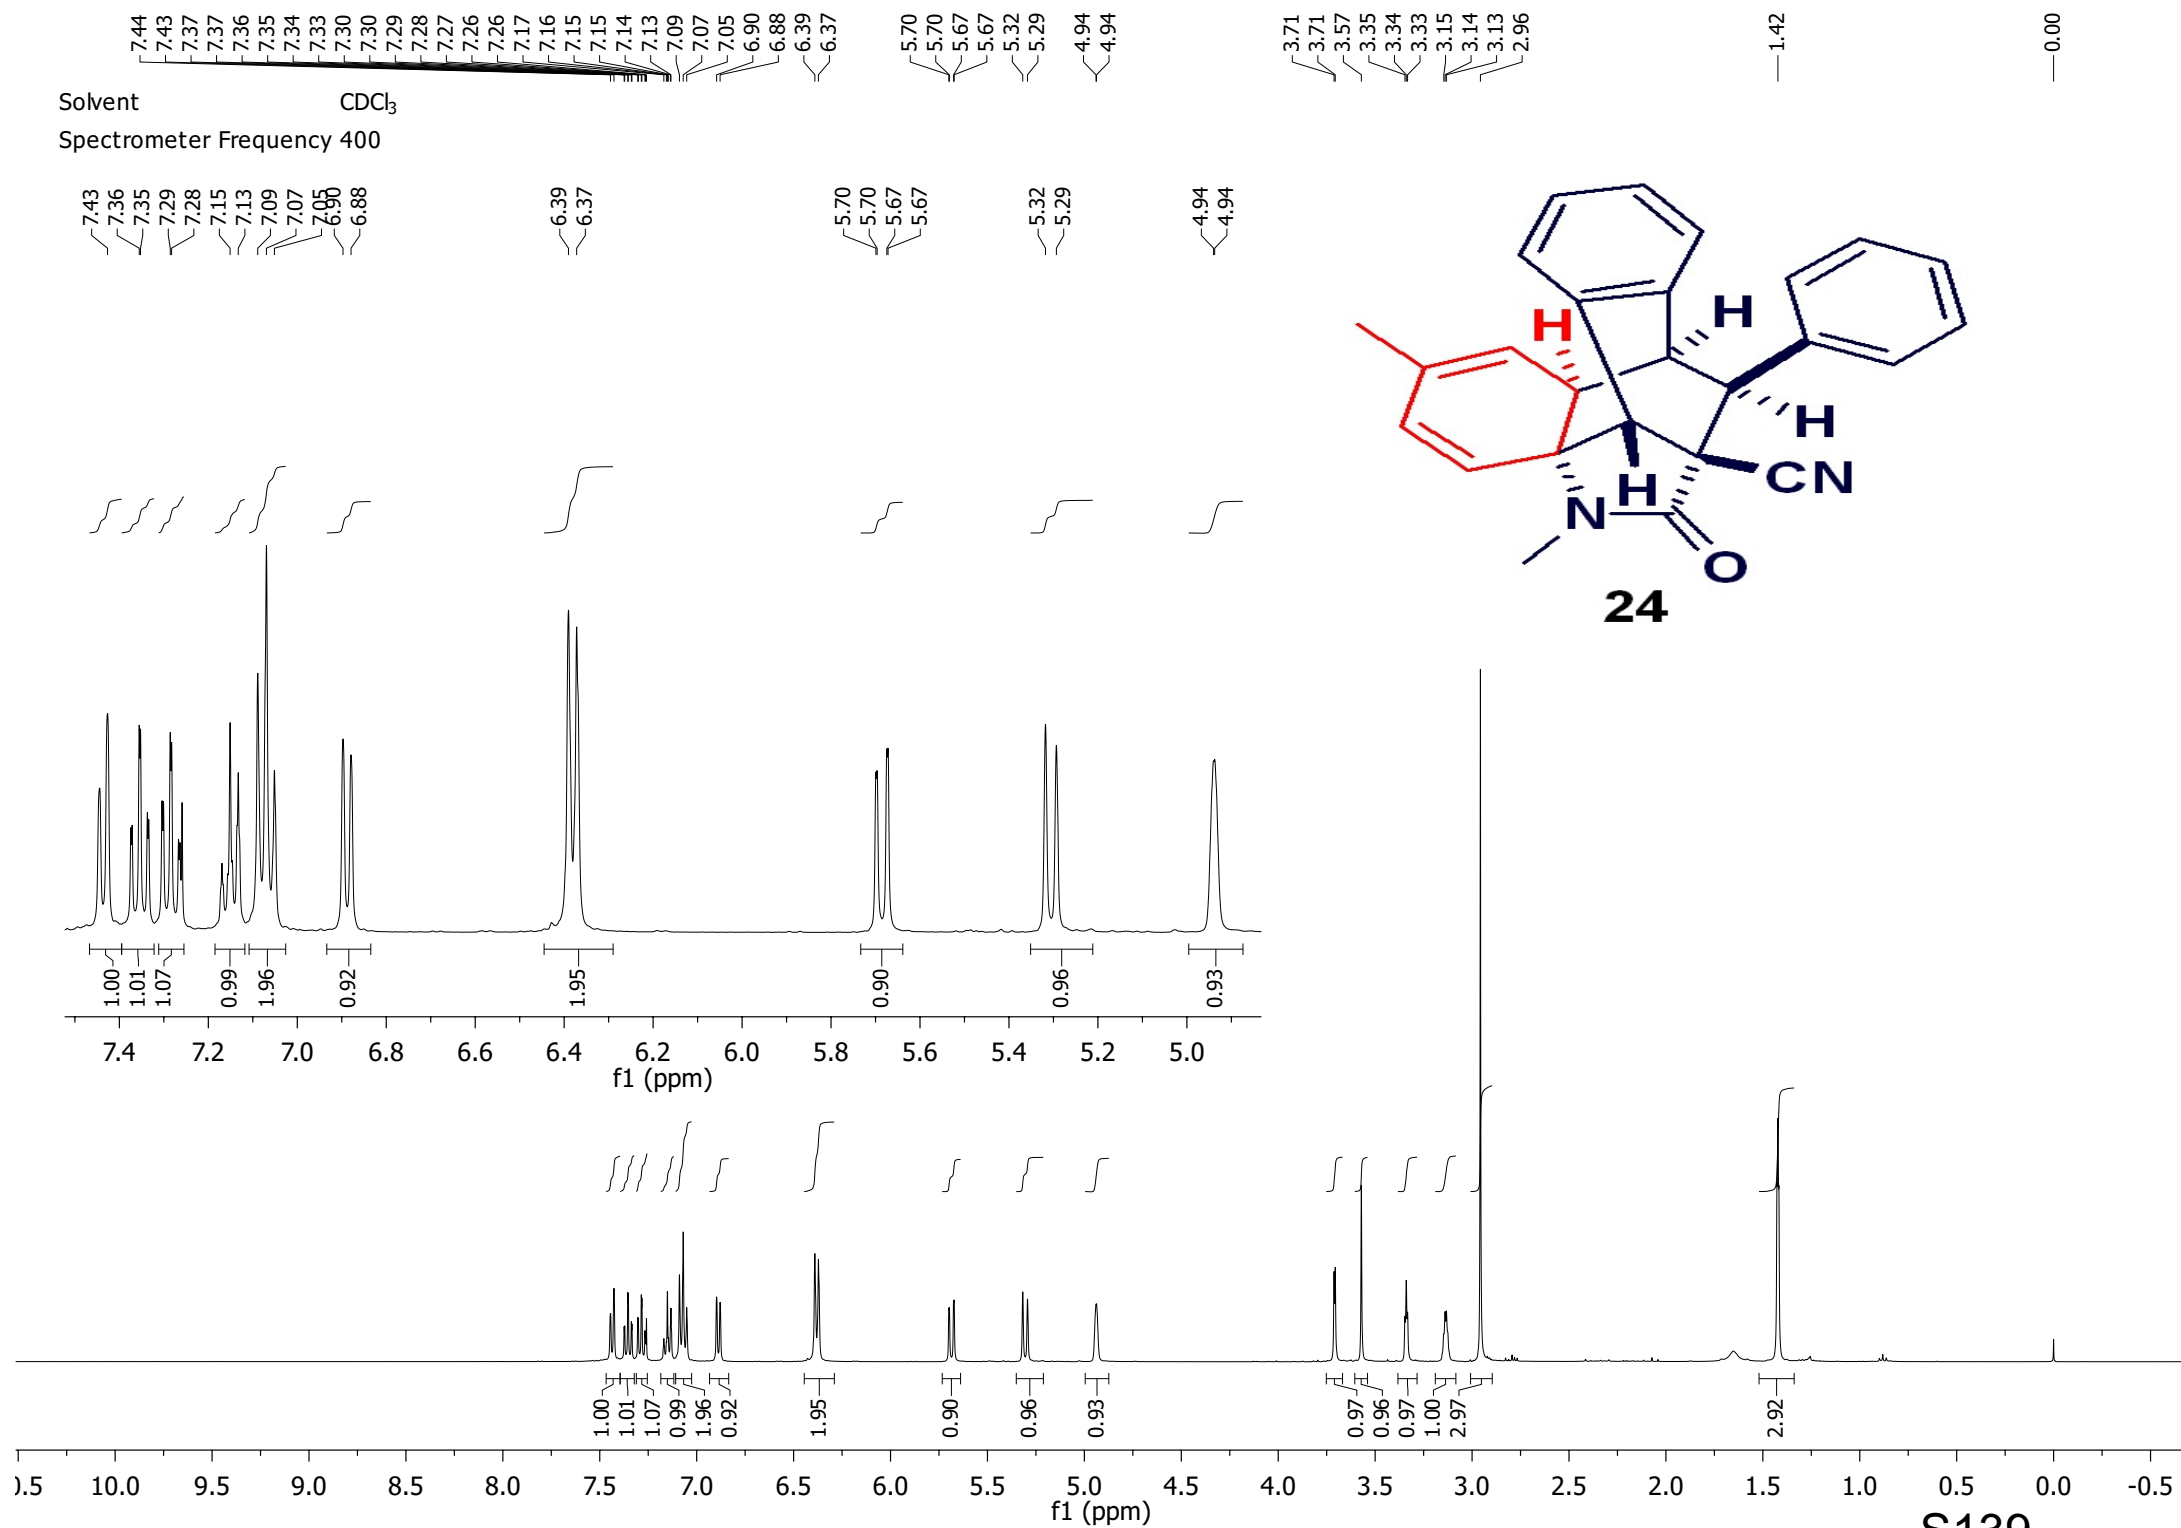

Solvent  $\text{CDCl}_3$   
Spectrometer Frequency 100

— 171.41

138.46  
137.96

132.20

129.00

127.85

127.78

127.72

127.47

127.36

116.88

77.31  
76.99  
76.67

64.65

53.70

51.71

50.99

47.67

44.27

27.44

21.02

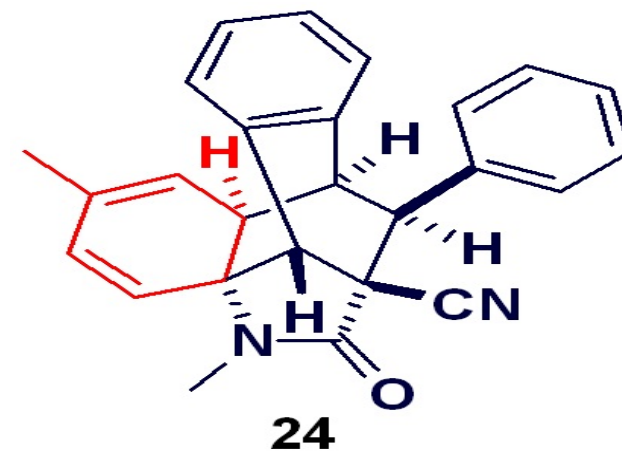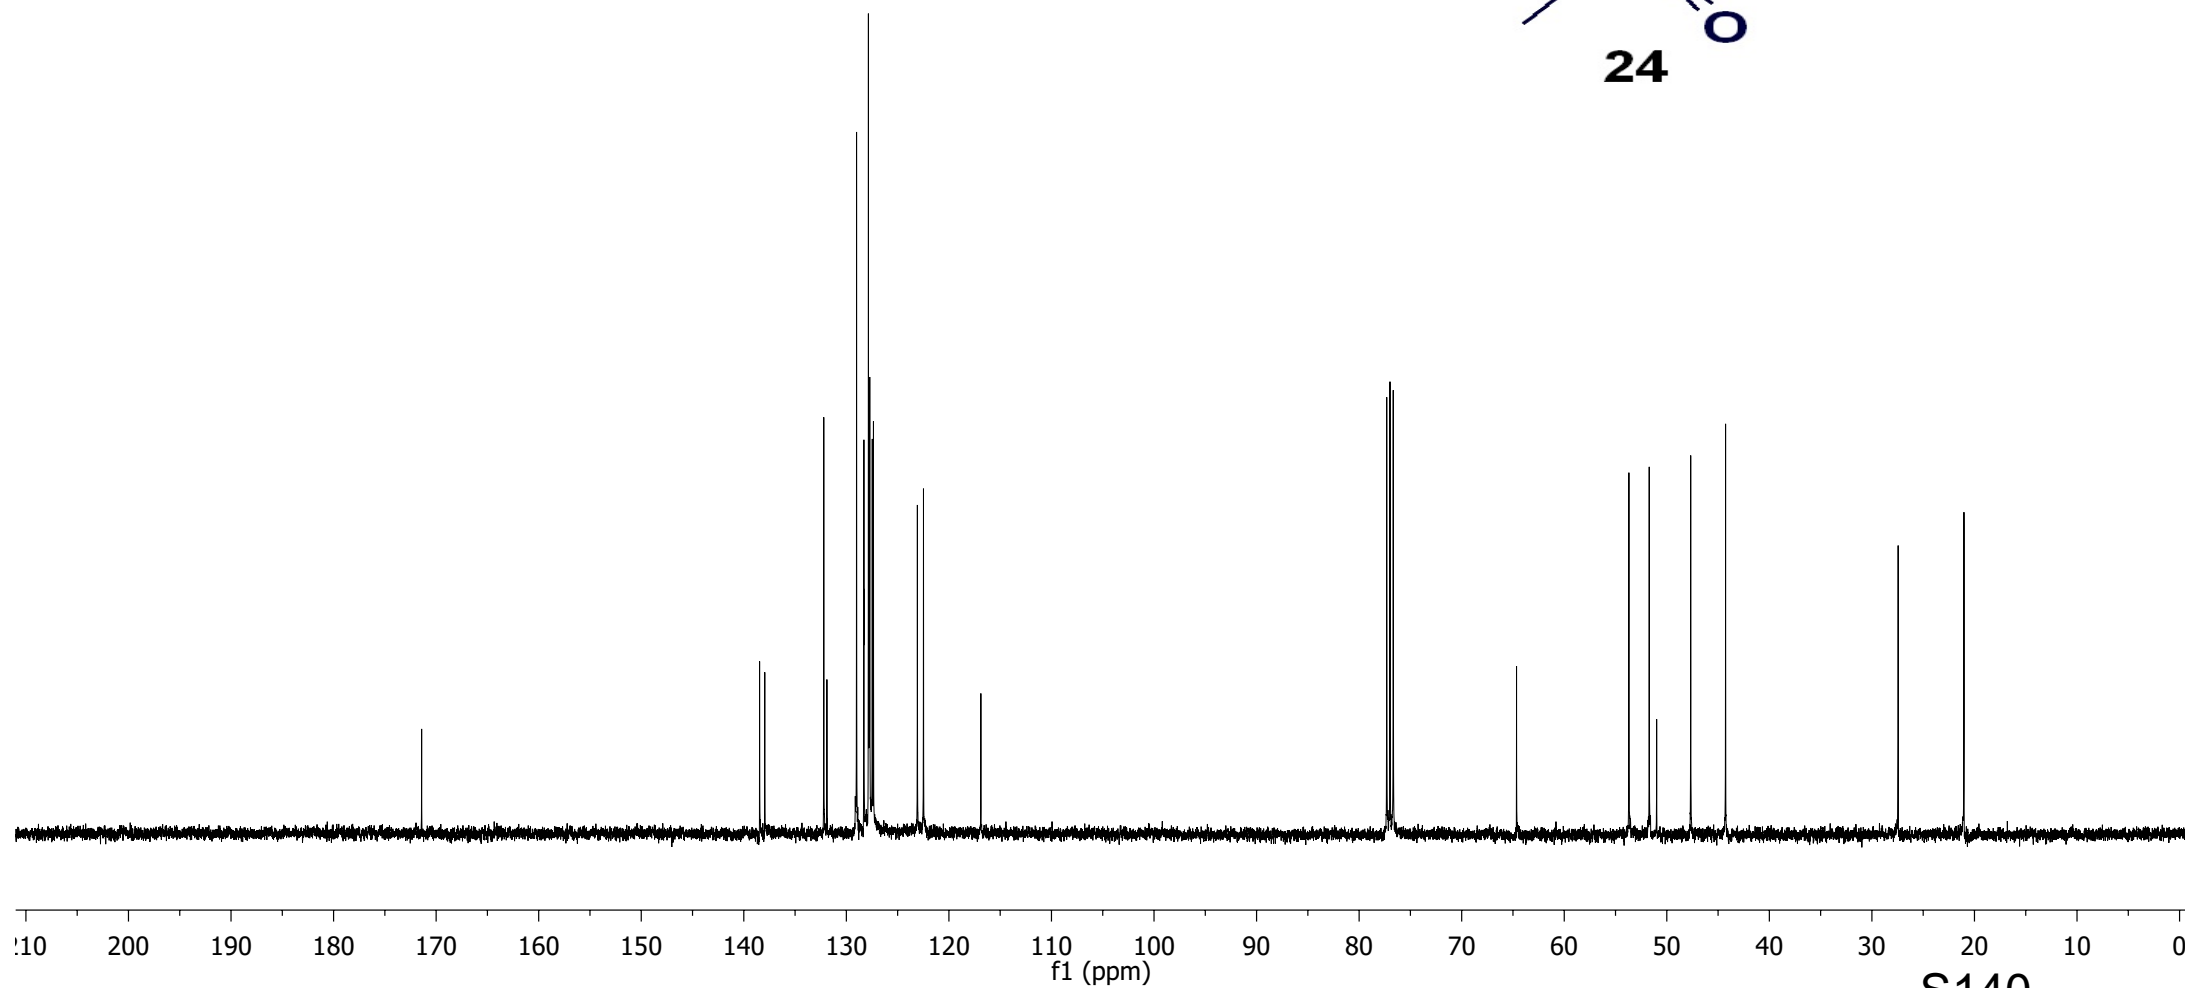

S140

Solvent  $\text{CDCl}_3$   
Spectrometer Frequency 400

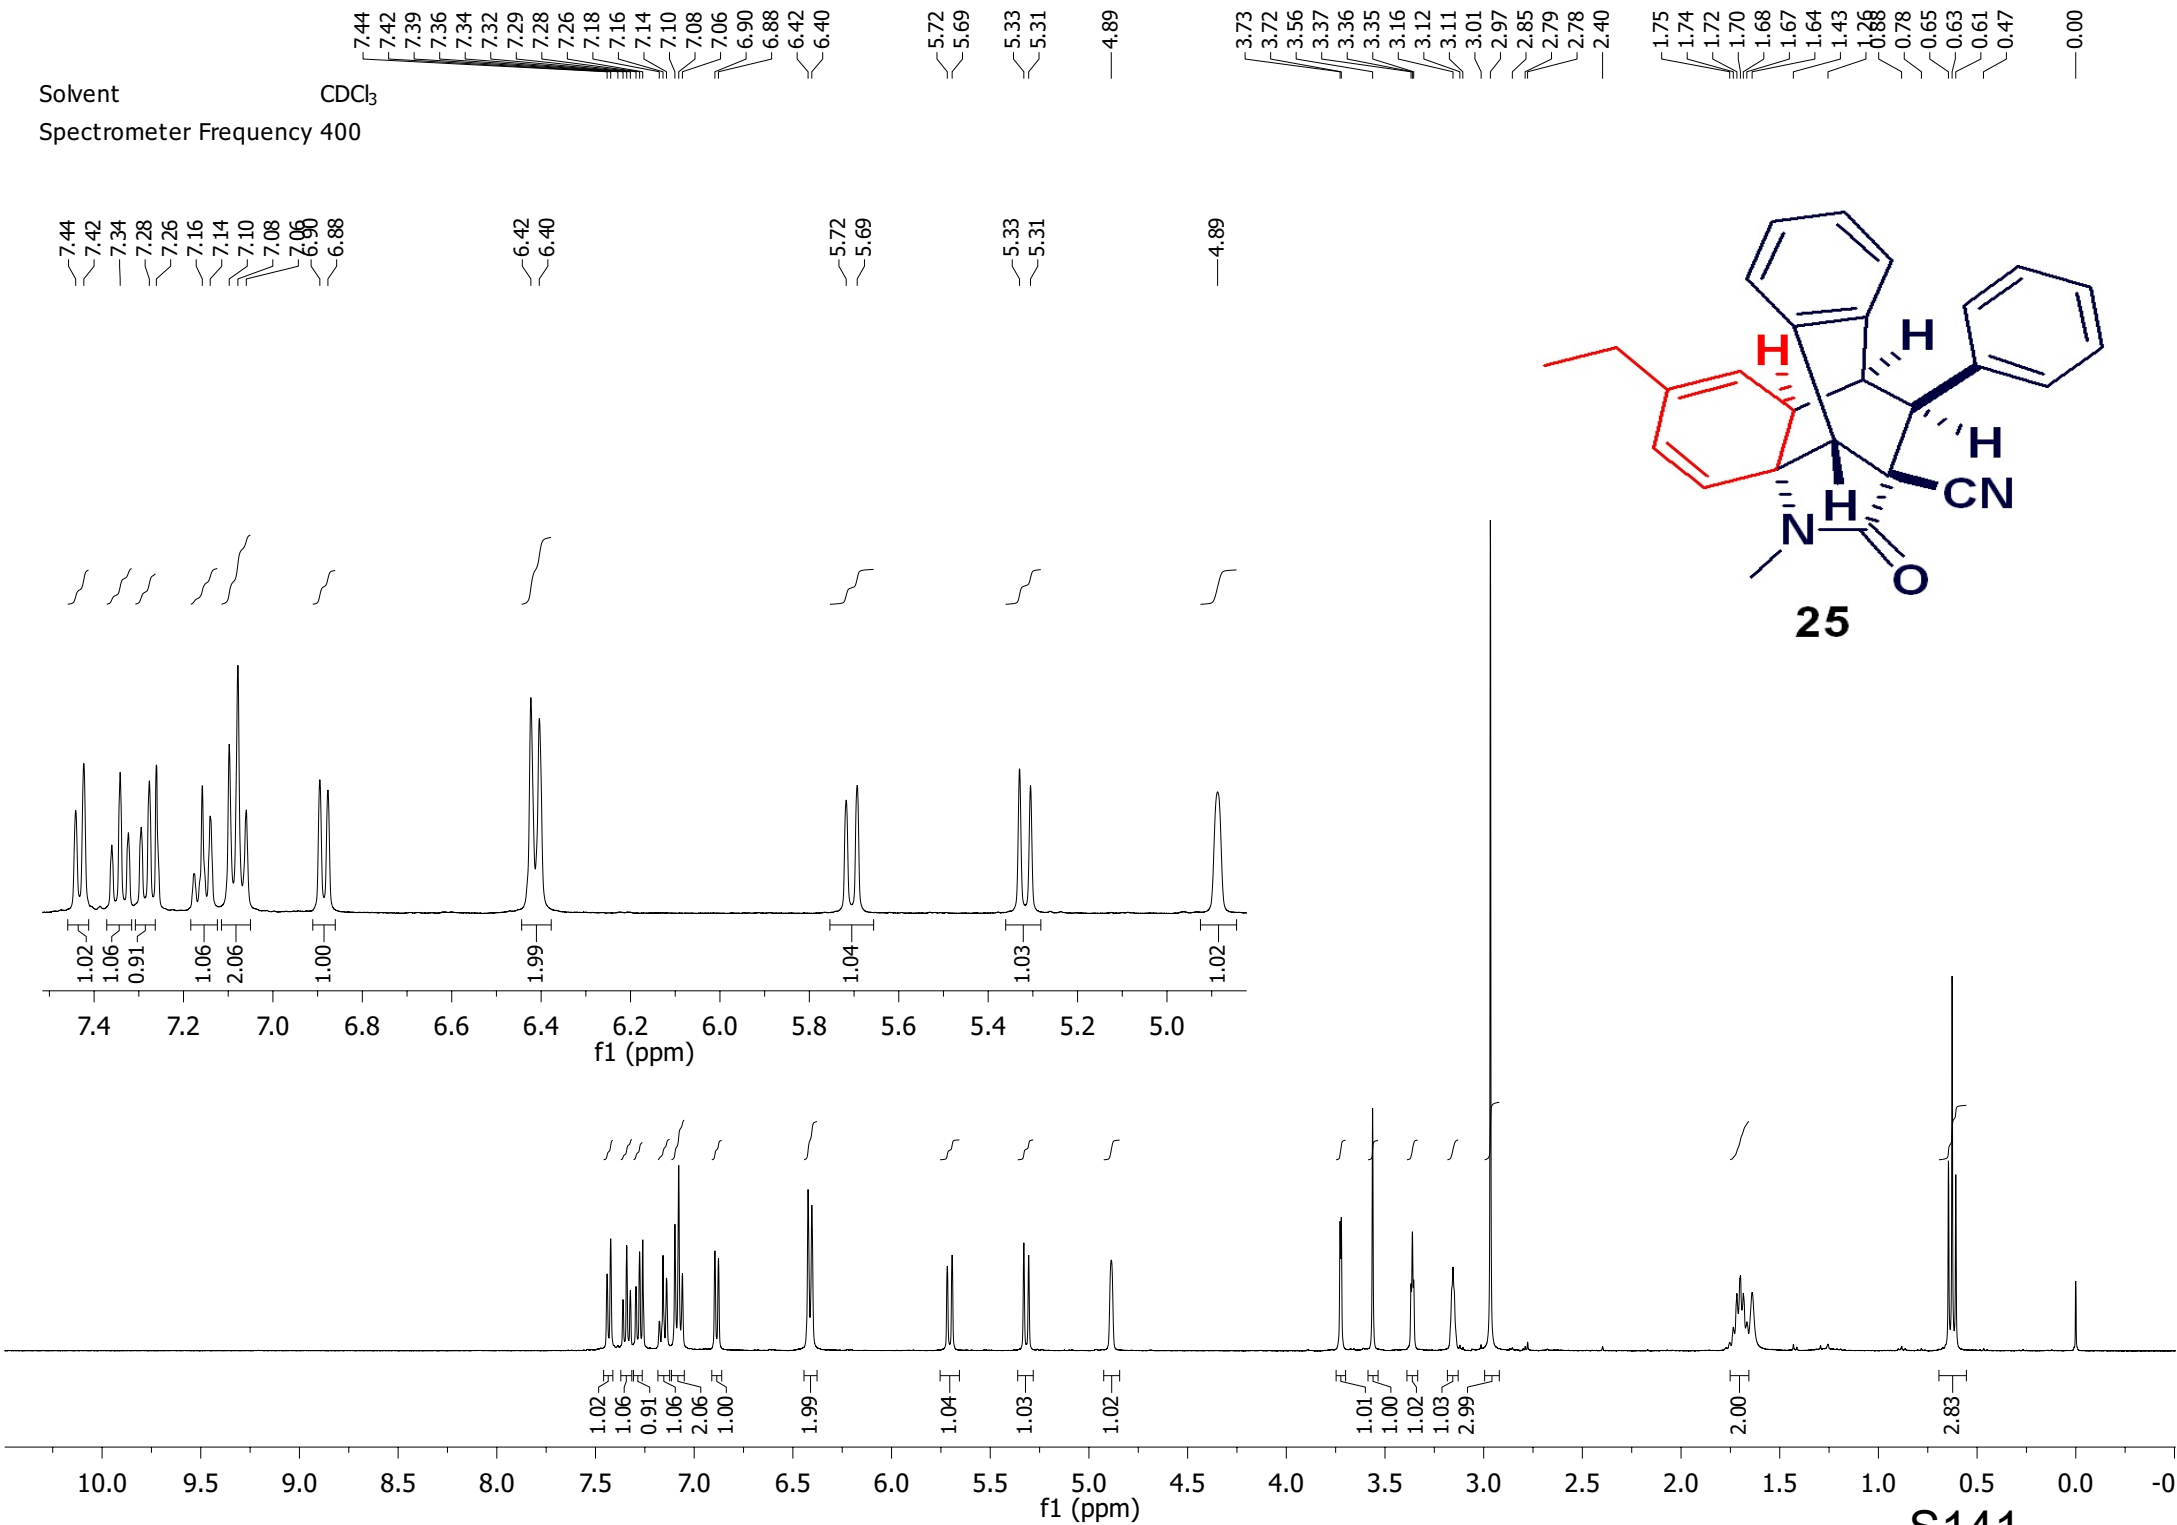

Solvent  
Spectrometer Frequency 100

CDCl<sub>3</sub>

171.45

138.52  
138.08  
134.32  
131.90  
131.36  
129.03  
128.21  
127.87  
127.73  
127.42  
127.25  
122.64  
121.74  
116.90

77.31  
76.99  
76.68

65.01

53.71  
51.65  
50.97  
47.73  
43.91

27.99  
27.47

12.39

138.52  
138.08

134.32

131.90  
131.36

129.03  
128.21  
127.87  
127.73  
127.42  
127.25

122.64  
121.74

116.90

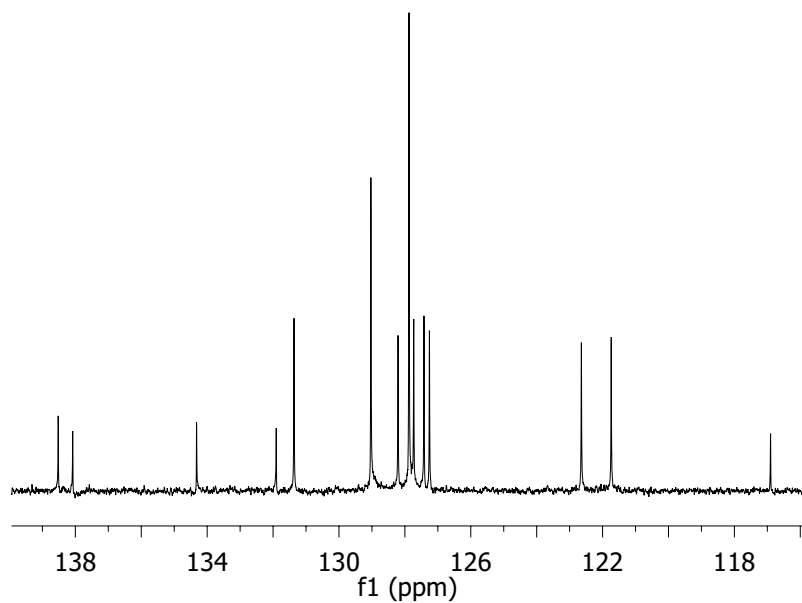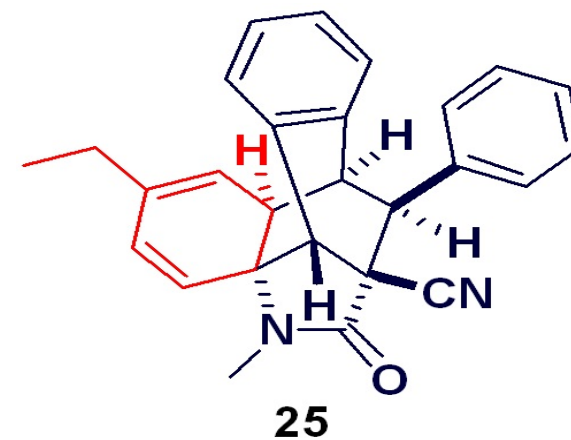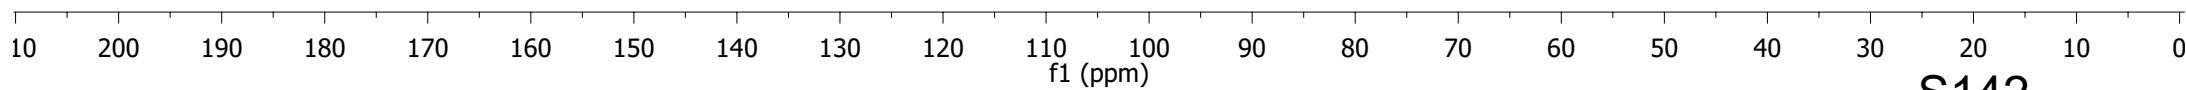

S142

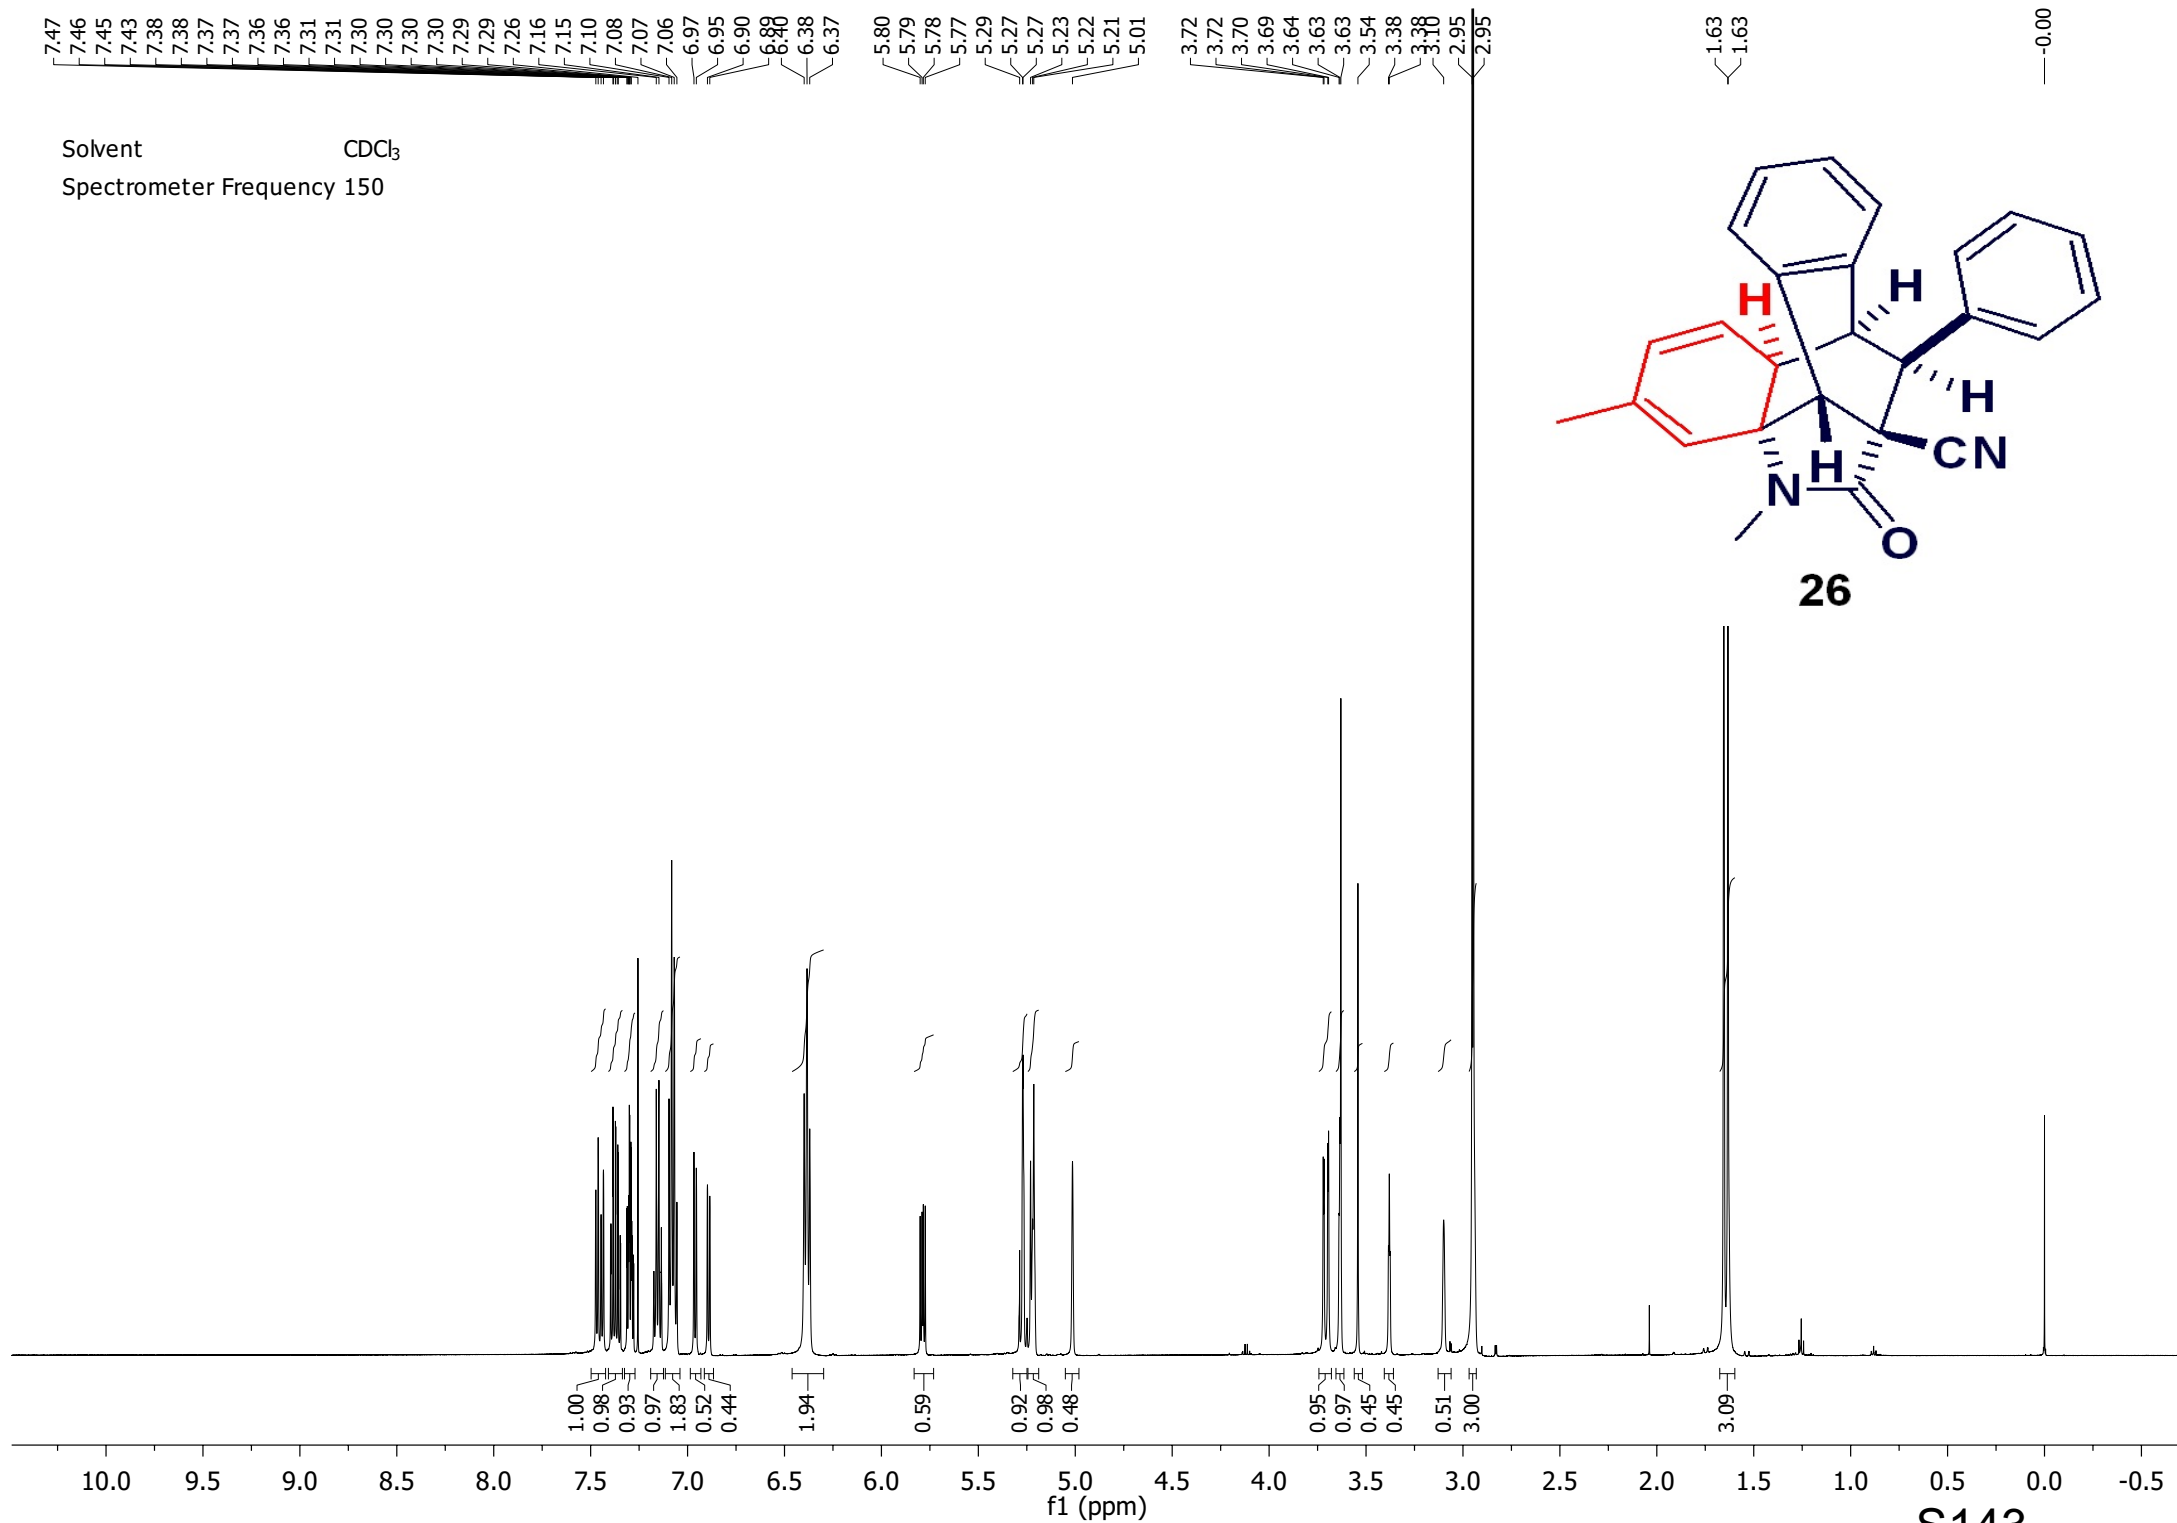

Solvent  $\text{CDCl}_3$   
Spectrometer Frequency 150

171.28  
171.11  
138.51  
138.44  
137.74  
137.12  
136.25  
134.68  
132.34  
132.31  
129.02  
128.78  
128.33  
128.30  
128.21  
127.92  
127.88  
127.86  
127.82  
127.74  
127.59  
127.47  
127.37  
126.81  
125.24  
120.43  
118.71  
117.04  
116.92  
116.90

77.20  
76.99  
76.78

65.59  
65.45

54.19  
53.86  
51.85  
51.75  
50.95  
50.26  
48.27  
47.31  
44.28  
43.67

27.41  
27.39  
21.66  
20.17

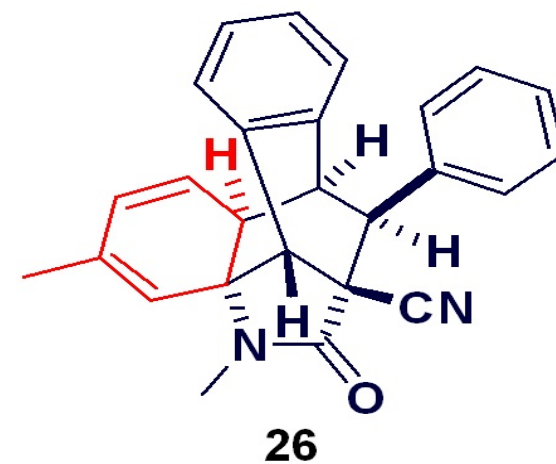

210 200 190 180 170 160 150 140 130 120 110 100 90 80 70 60 50 40 30 20 10 0  
f1 (ppm)

S144

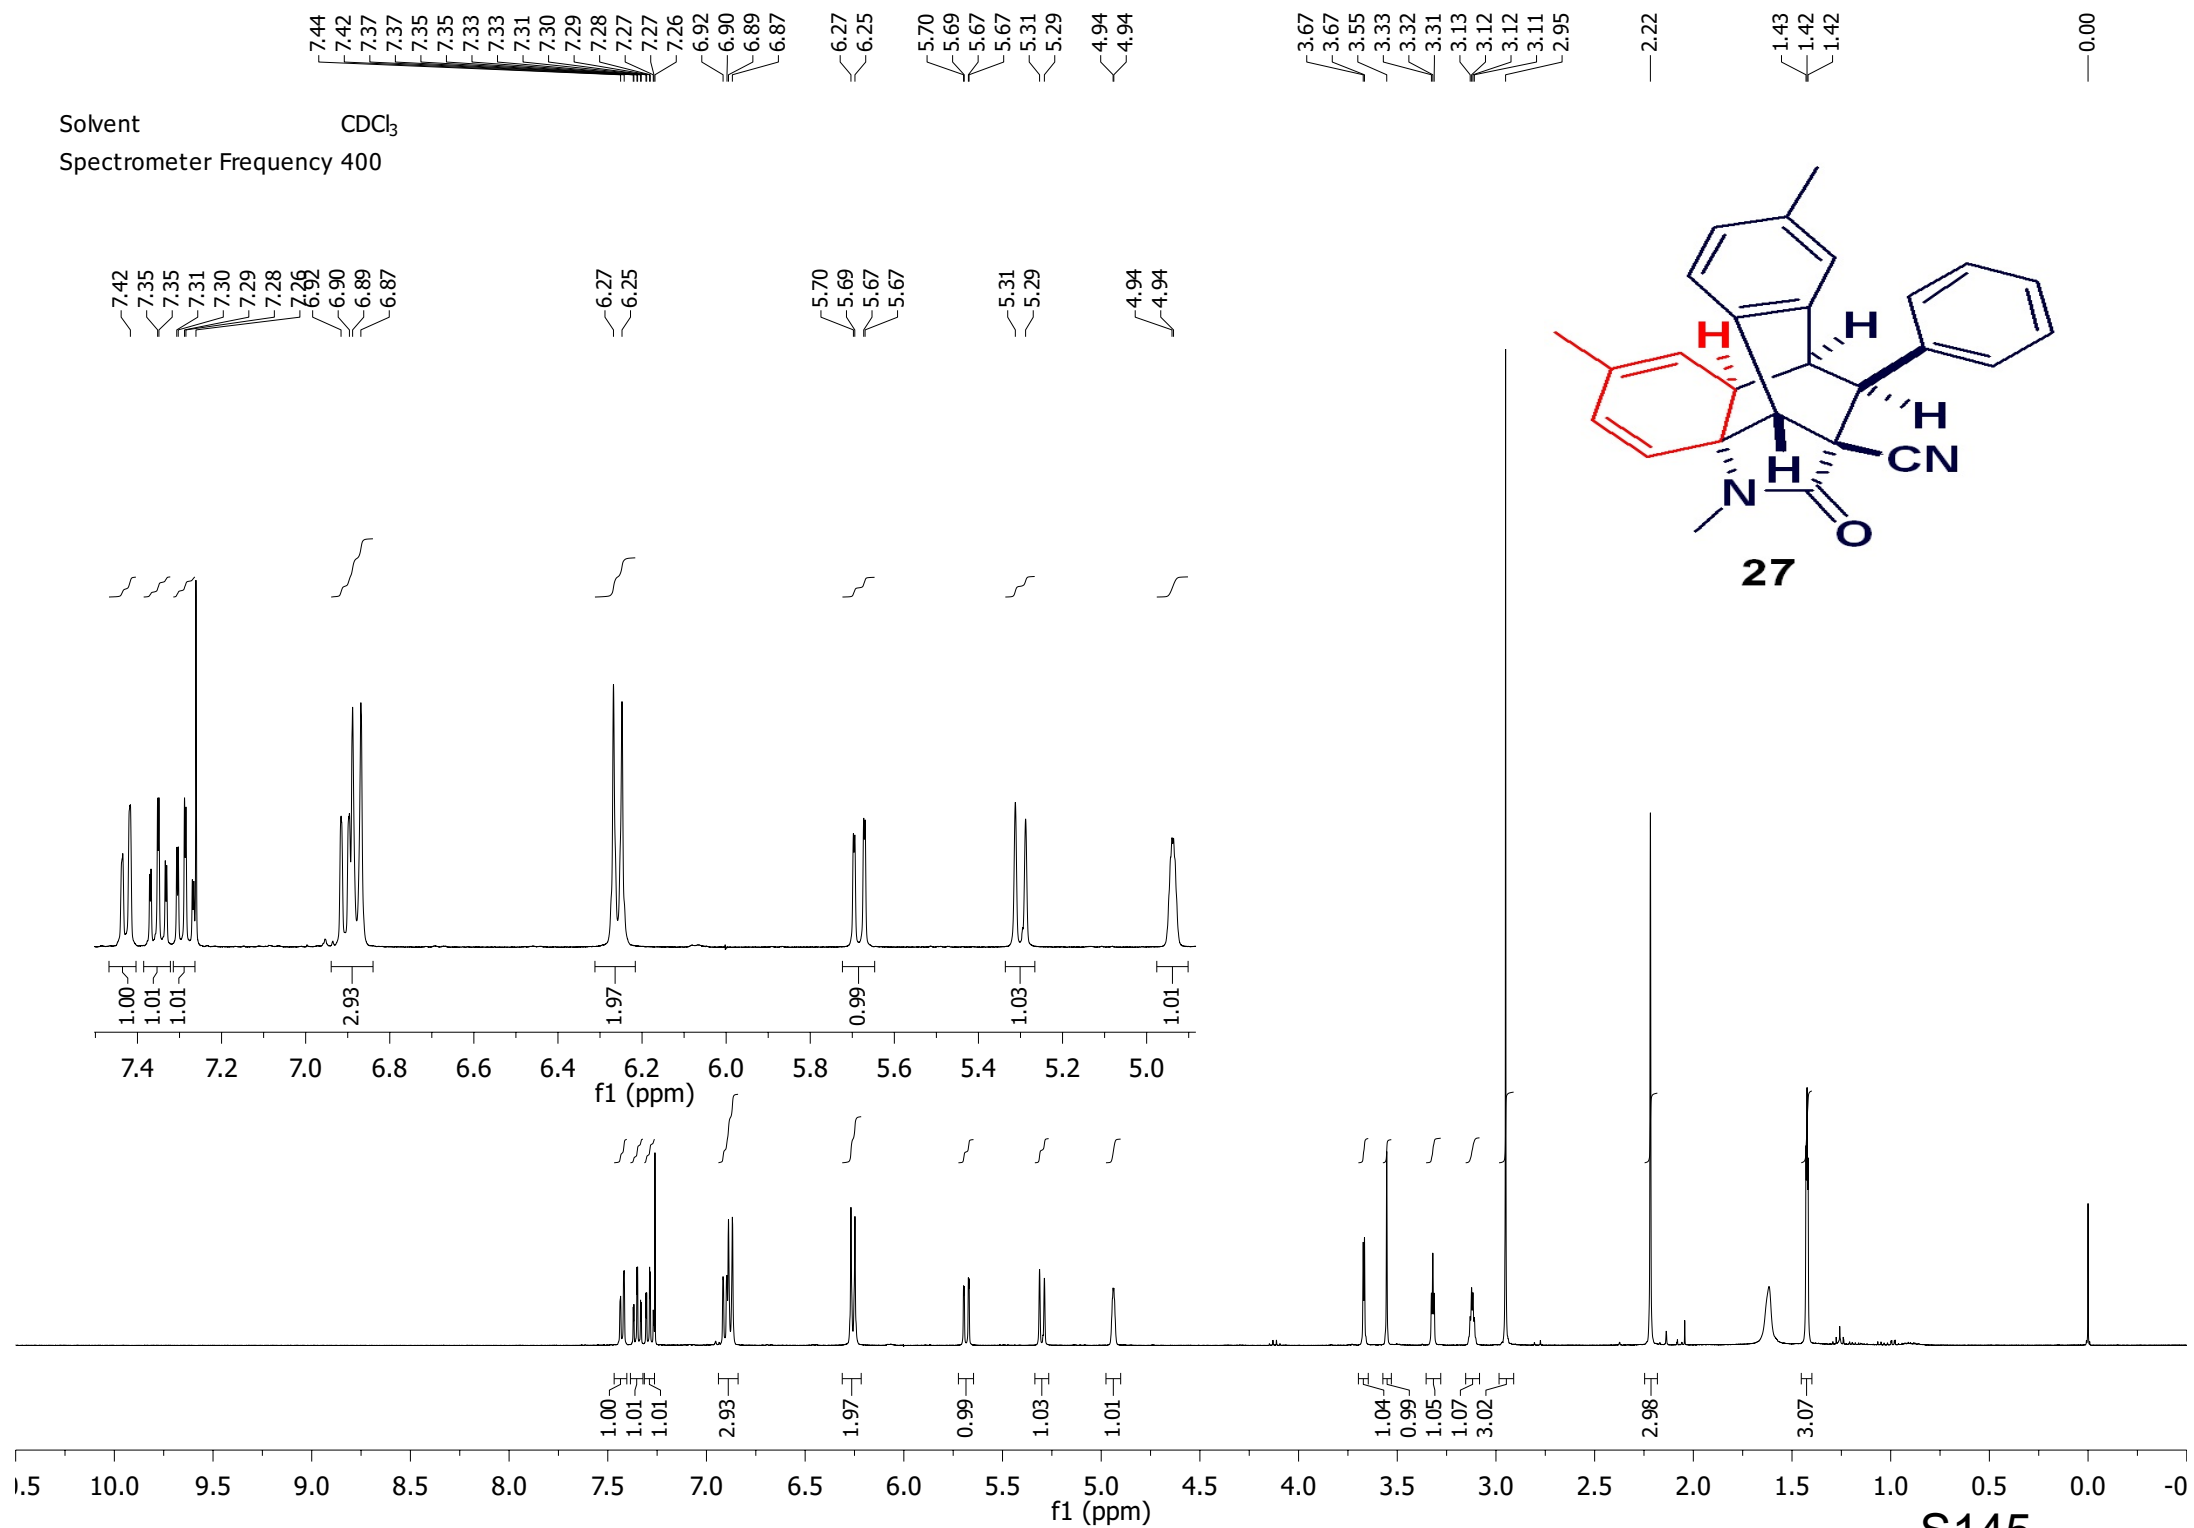

Solvent

CDCl<sub>3</sub>

Spectrometer Frequency 100

138.12  
137.40  
135.54  
132.20  
131.94  
128.88  
128.59  
128.29  
128.26  
127.79  
127.50  
127.32  
123.17  
122.54  
116.96

77.31  
76.99  
76.67

64.66

53.75  
51.45  
51.15  
47.79  
44.30

27.43  
21.03  
20.97

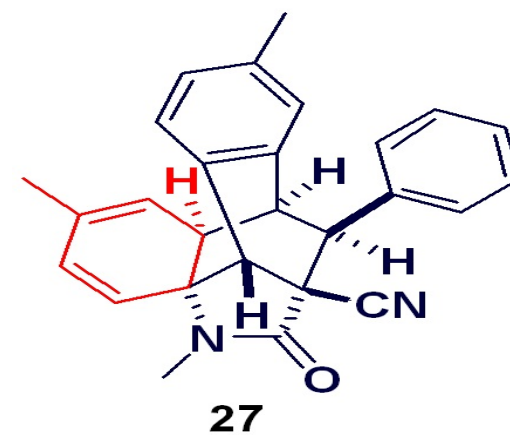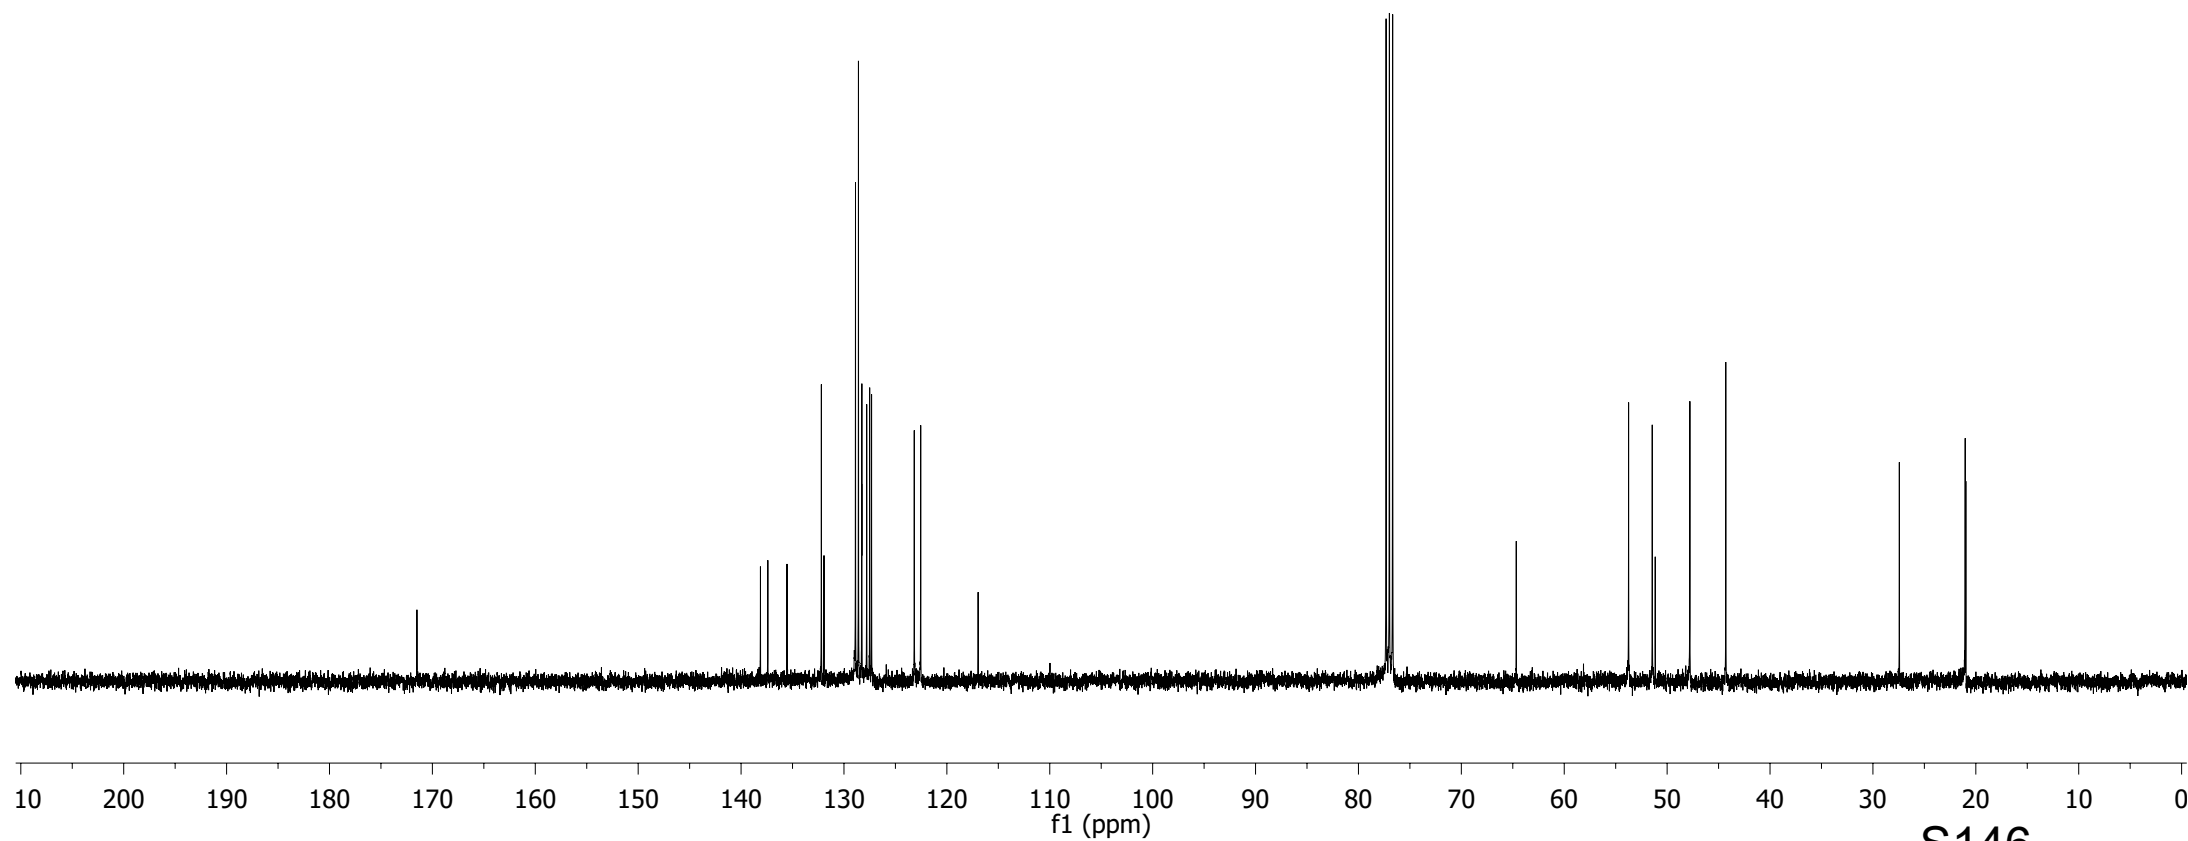

S146

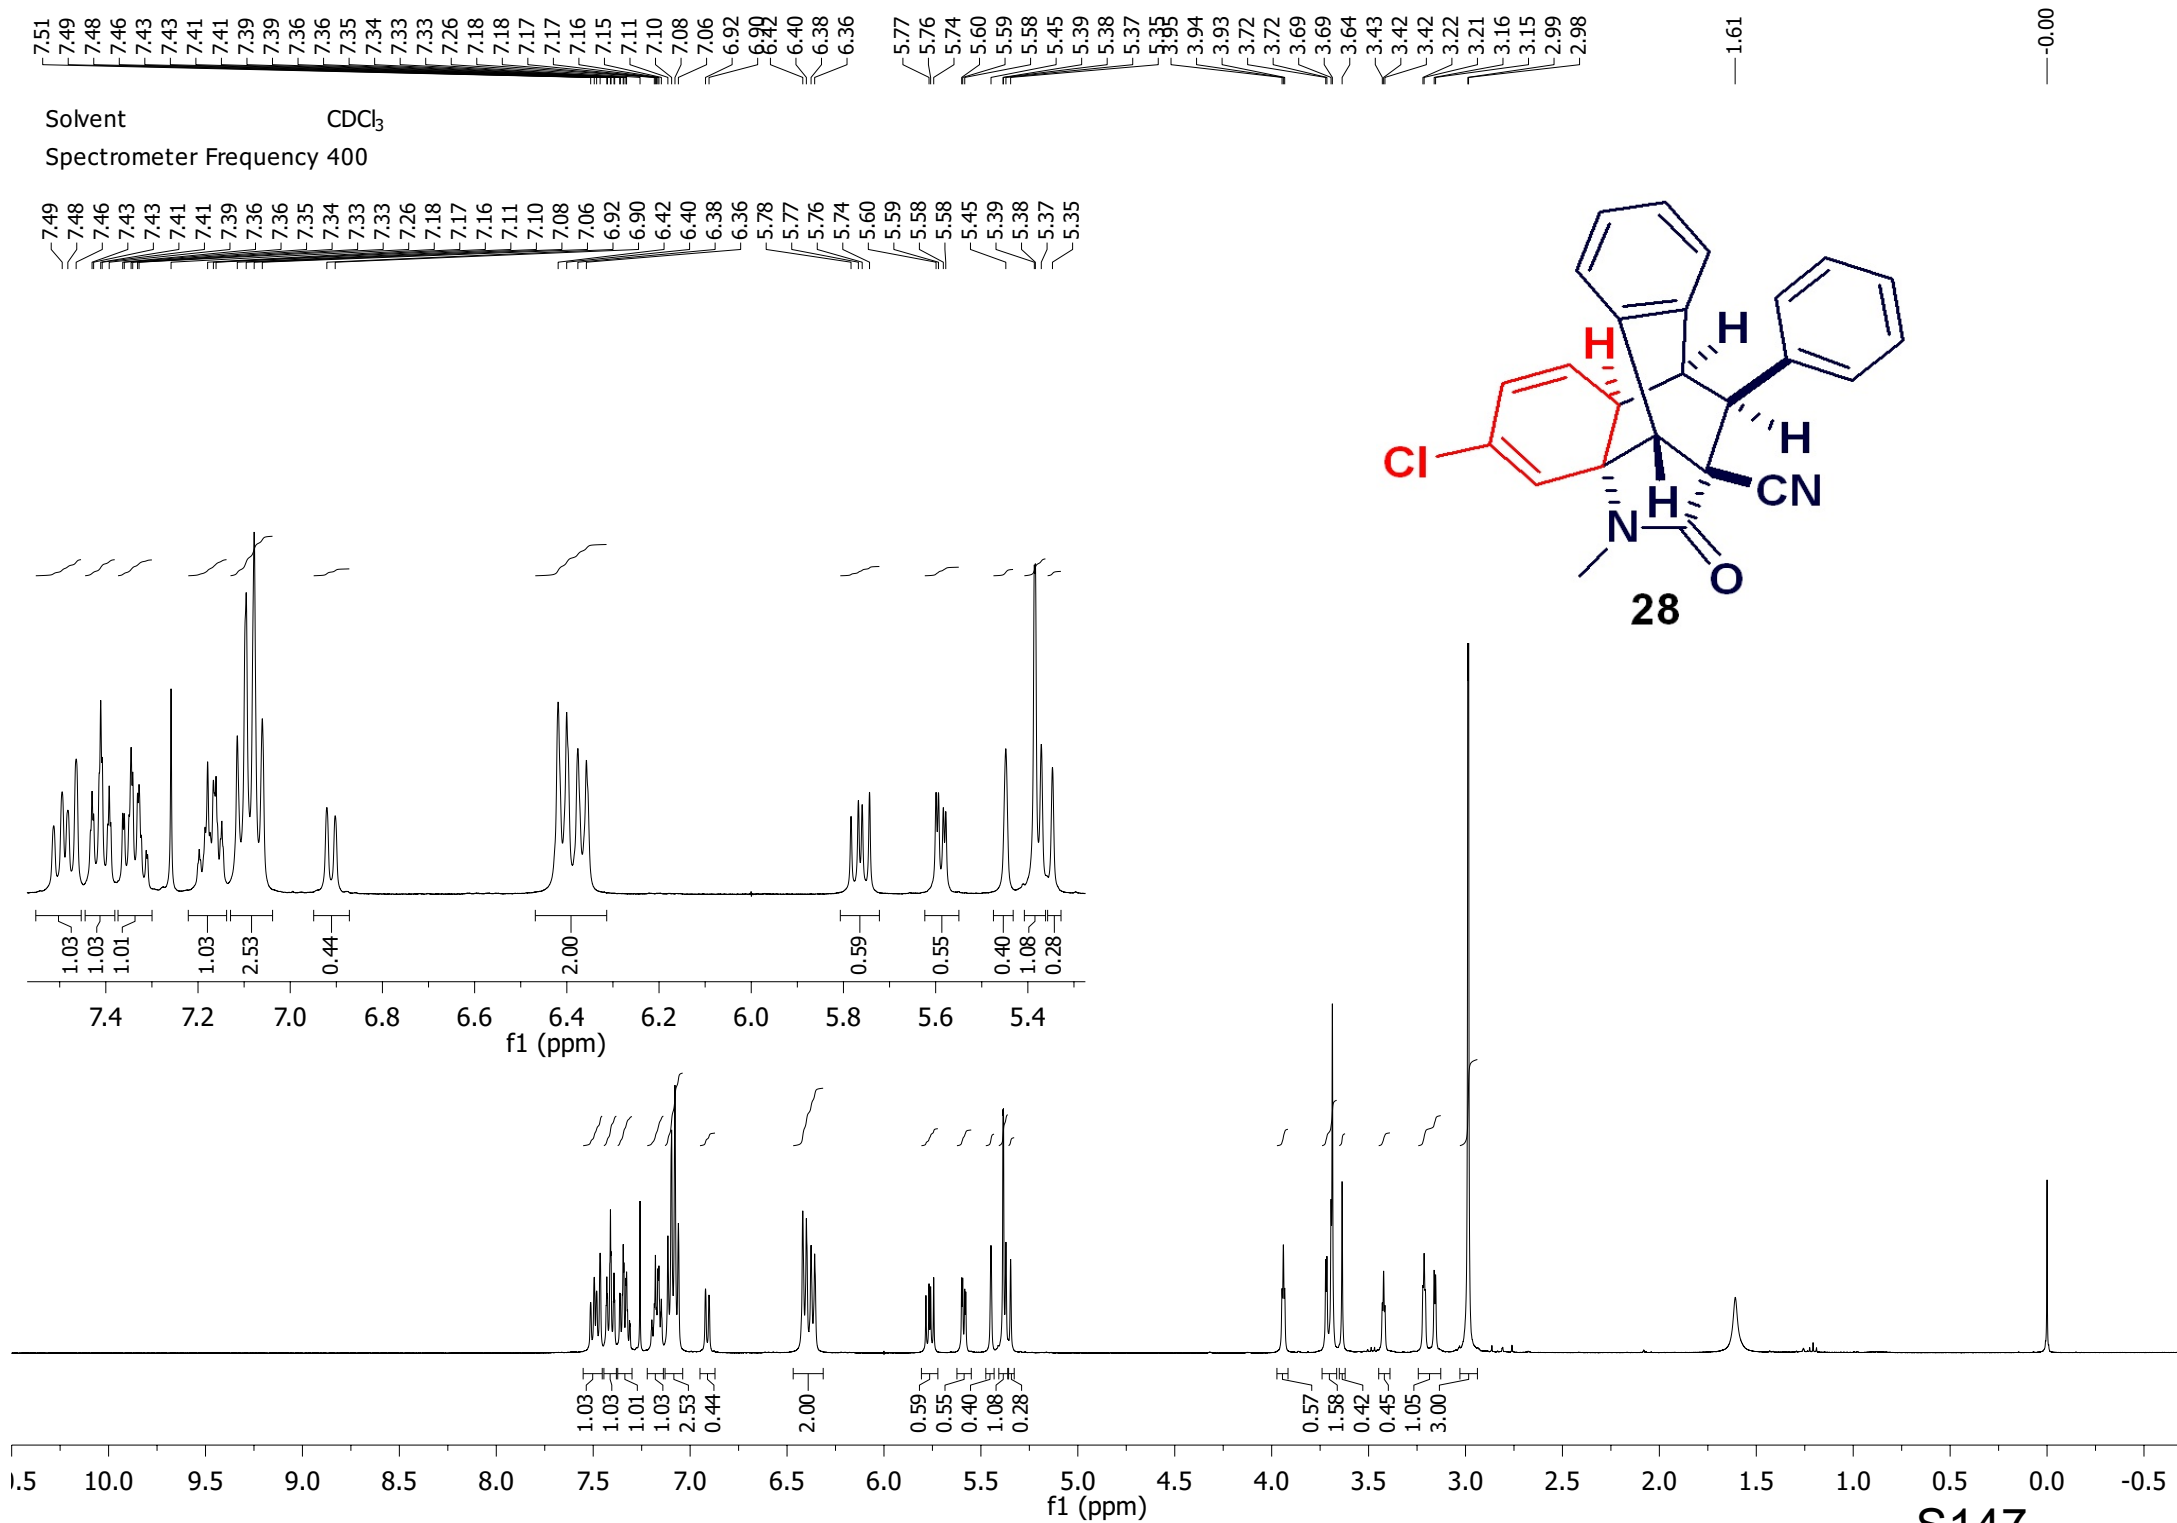

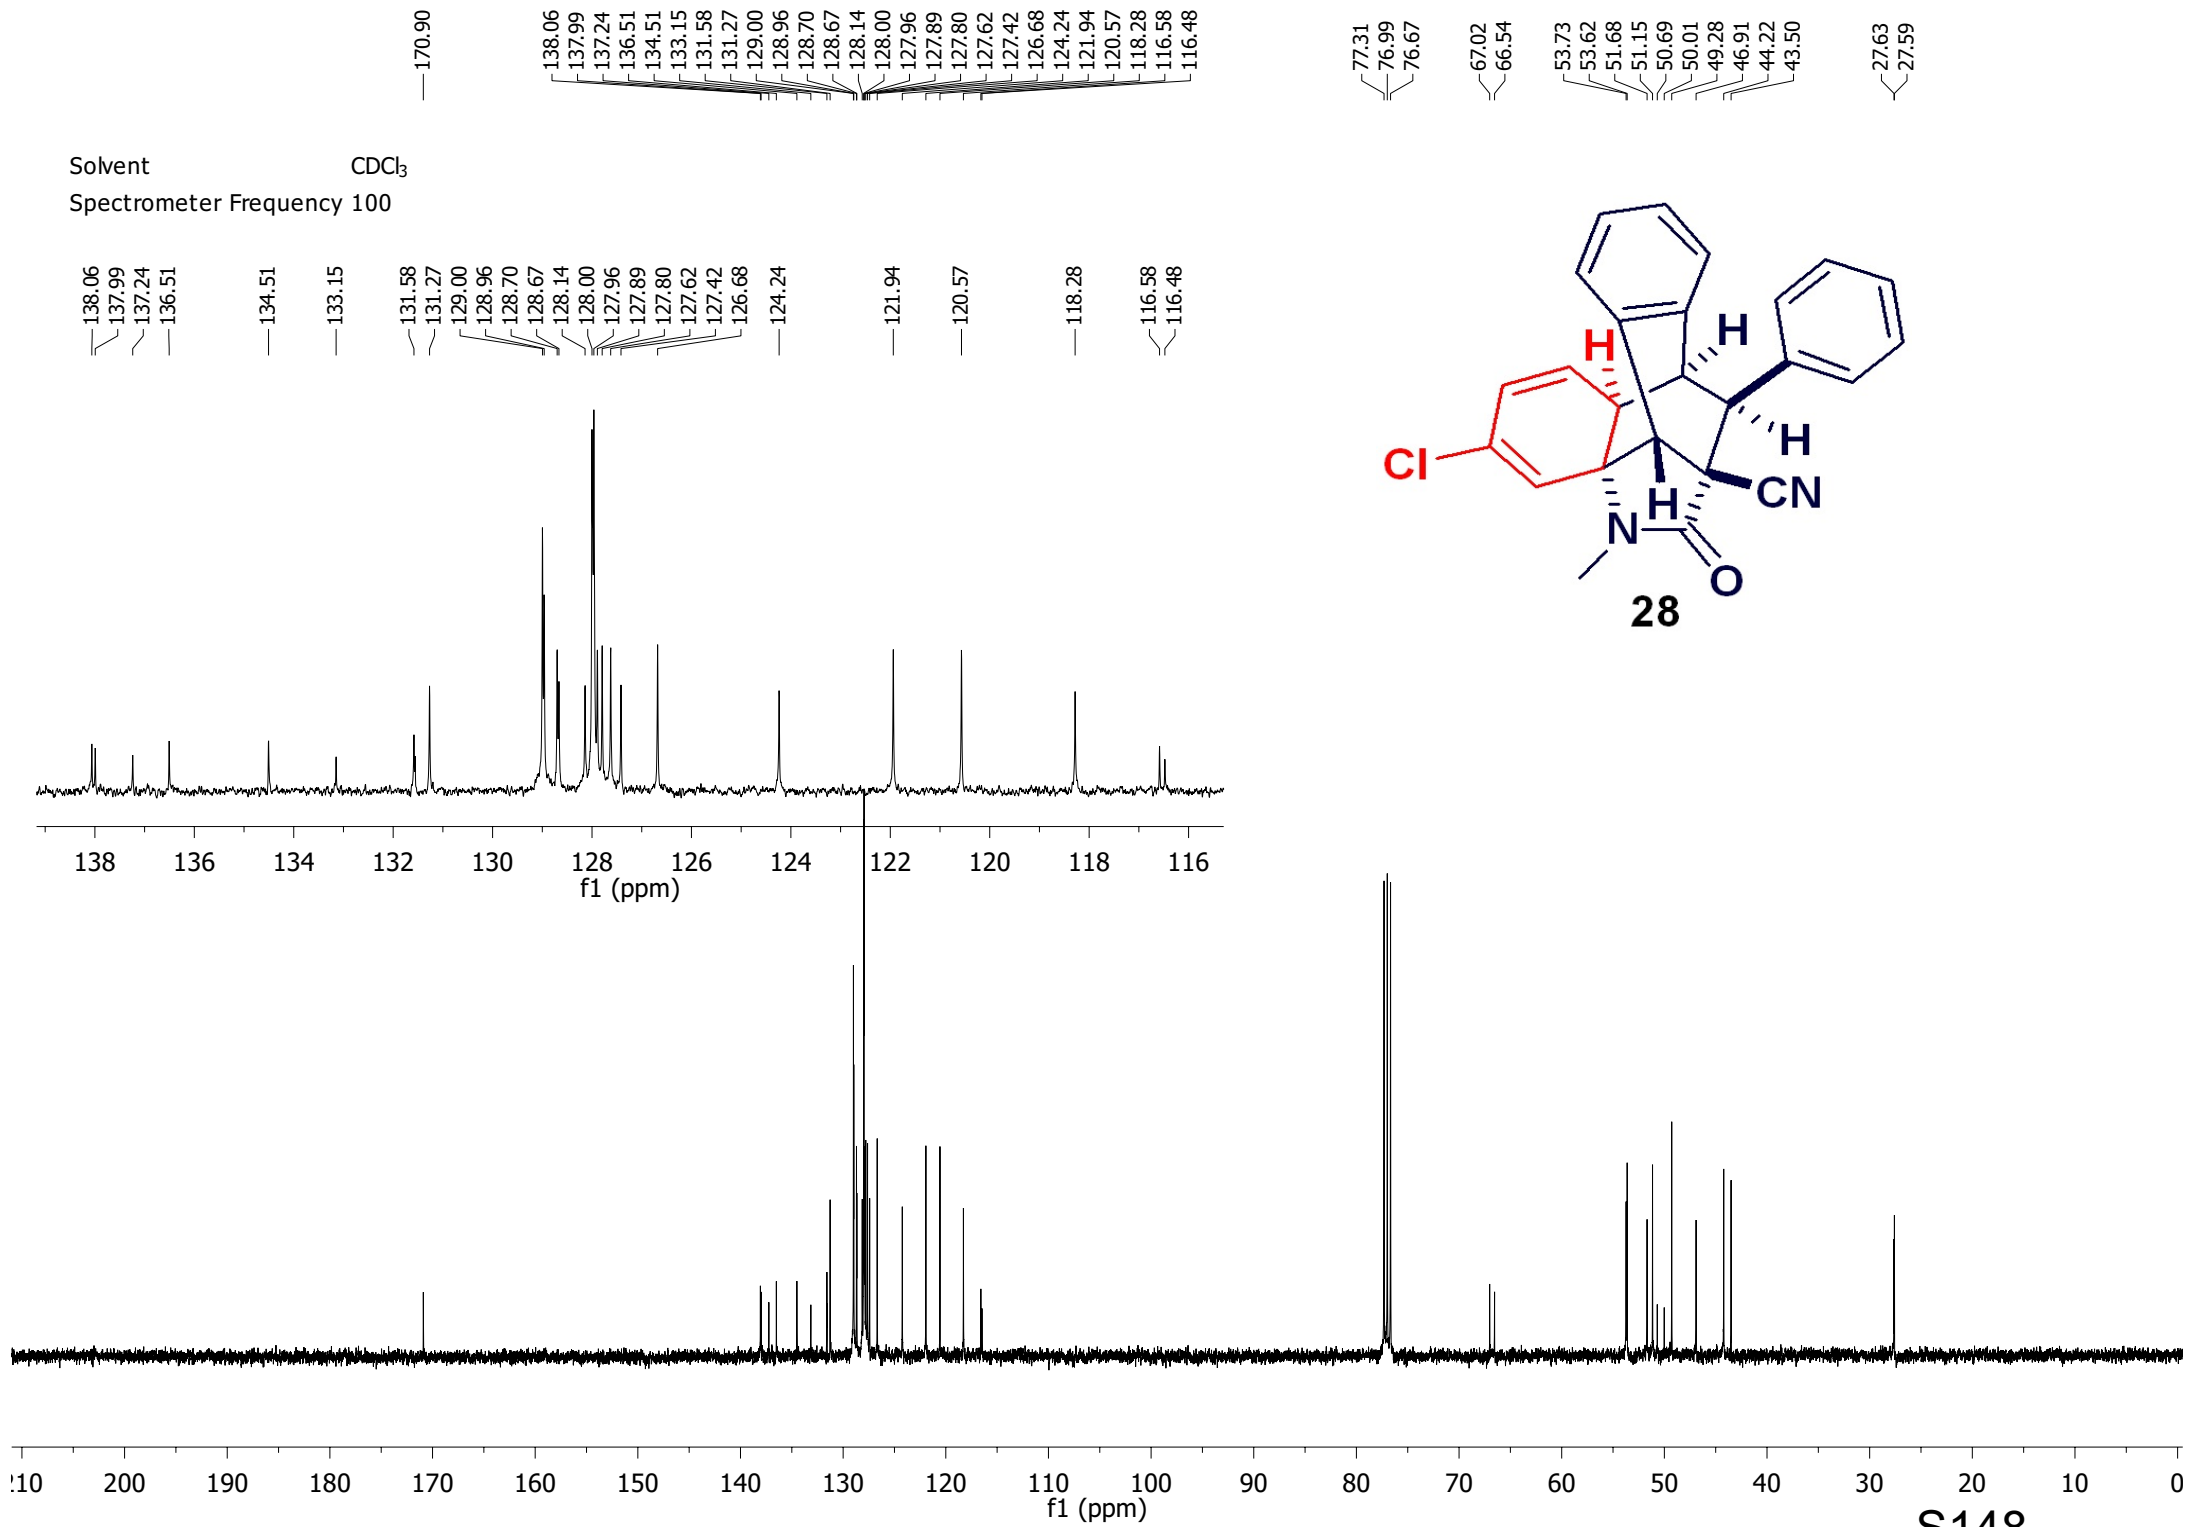

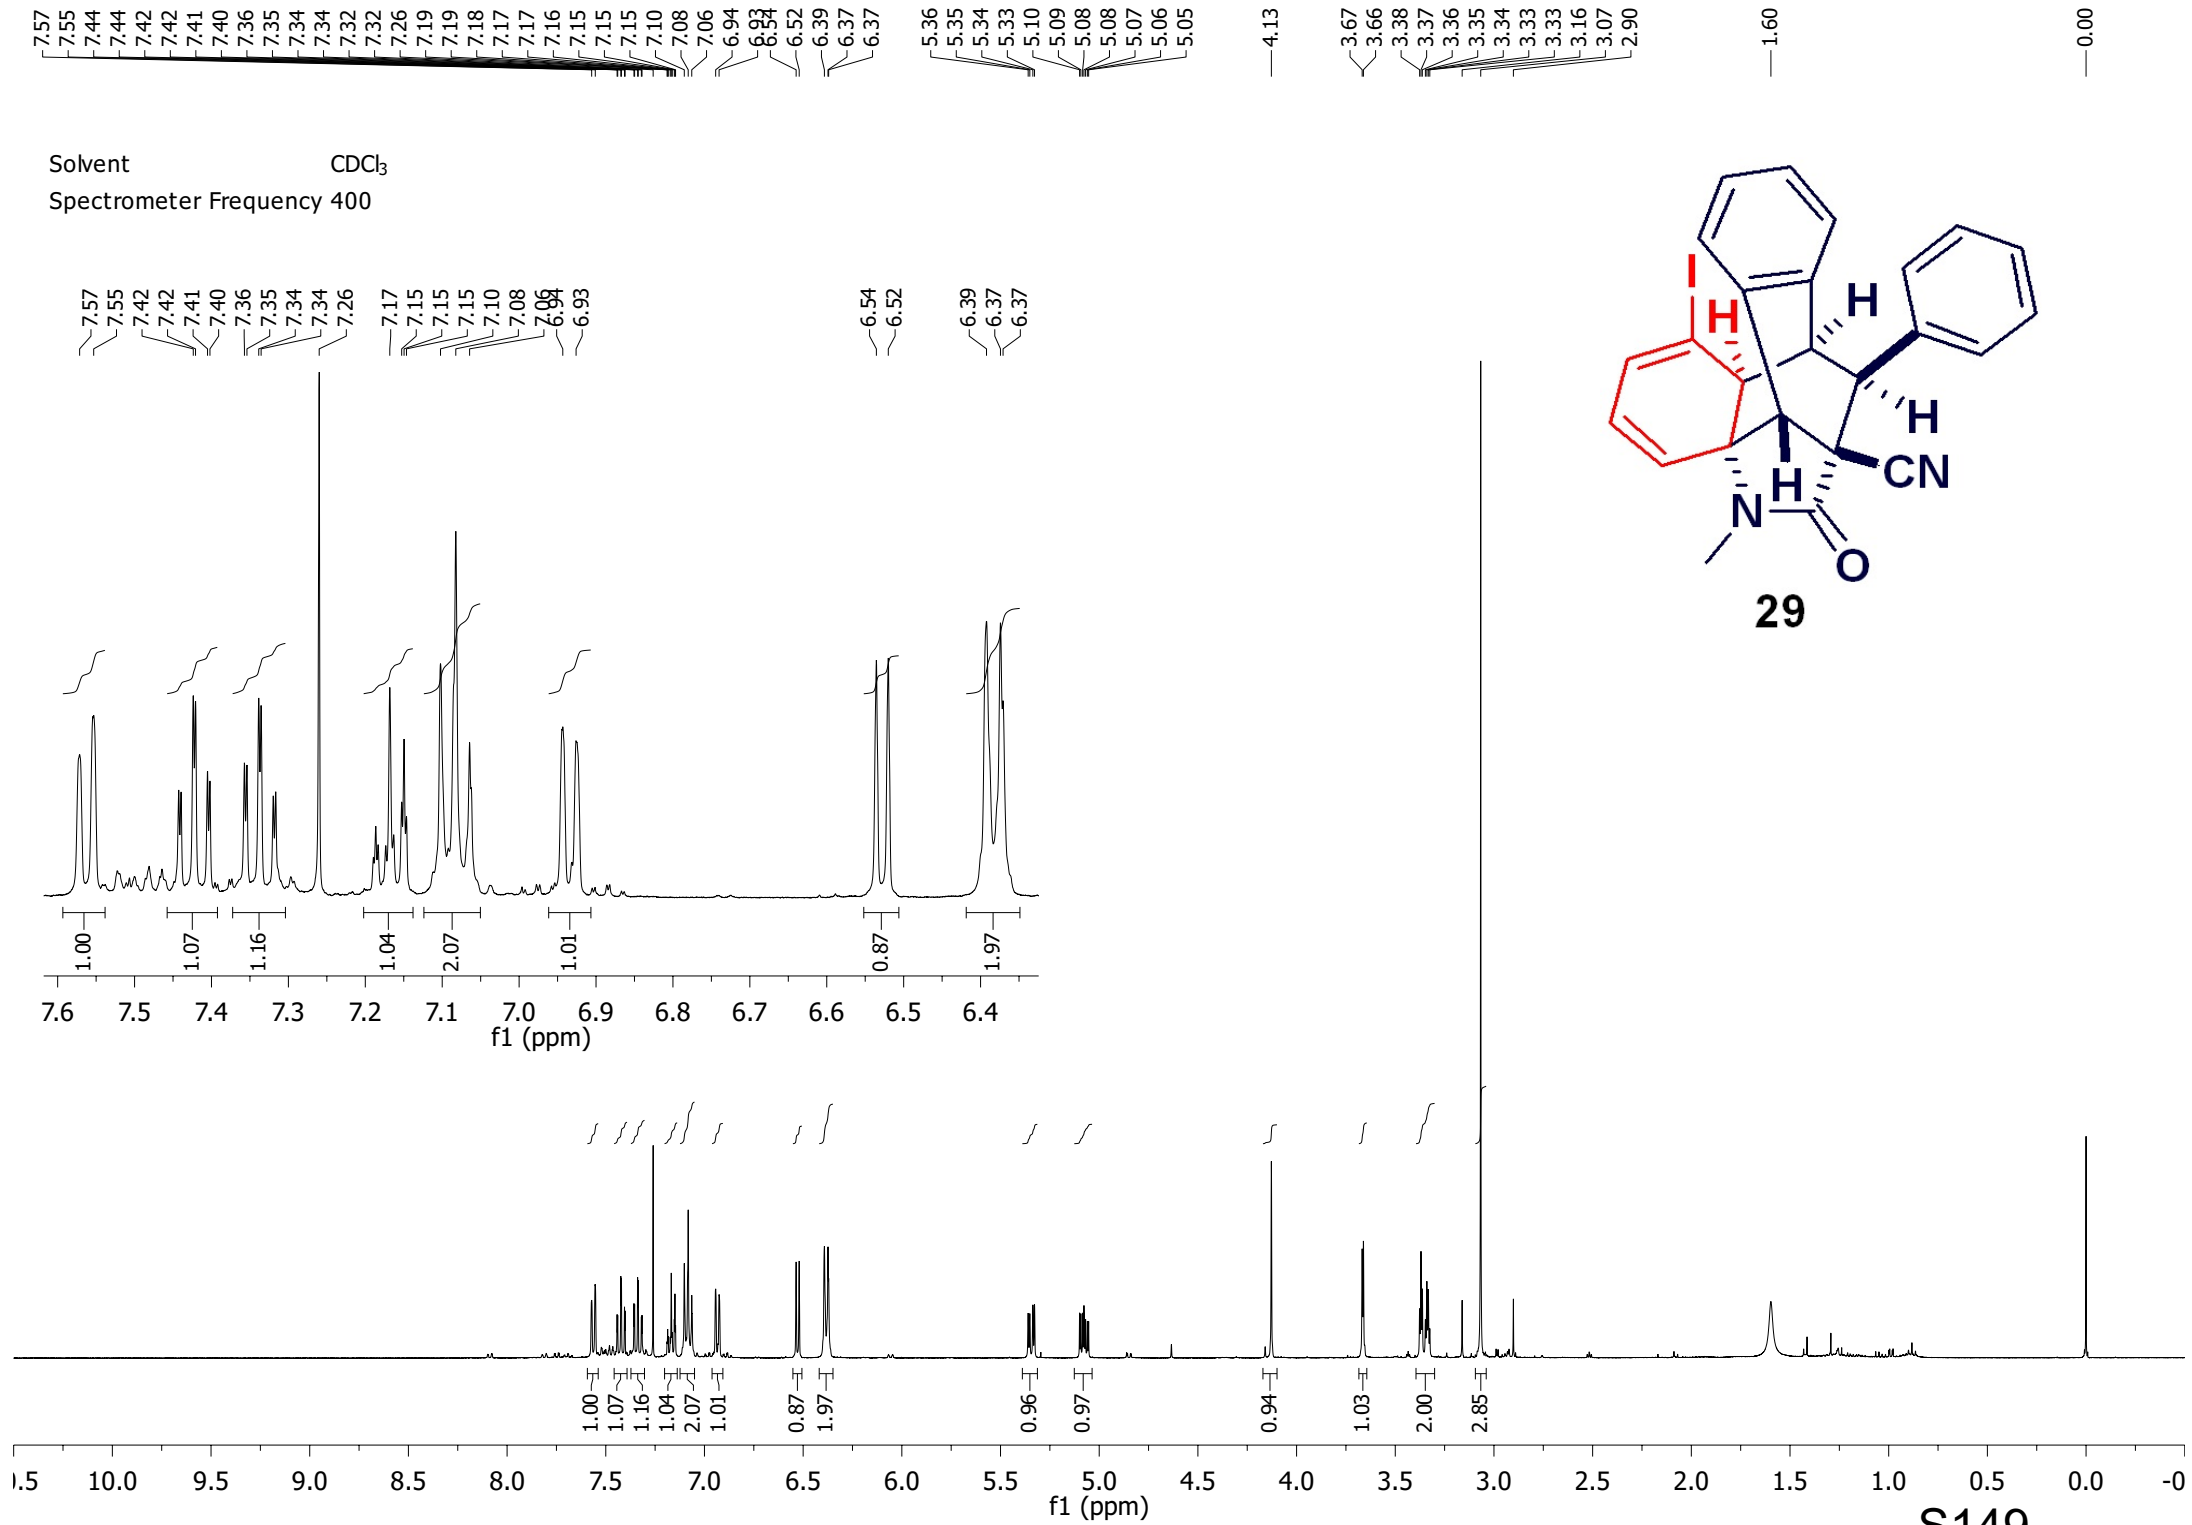

Solvent  $\text{CDCl}_3$   
Spectrometer Frequency 100

—171.20

—140.69

—137.95

—137.82

—129.00

—128.73

—127.99

—127.97

—127.40

—121.76

—116.63

—99.63

—77.31

—76.99

—76.67

—69.93

—52.44

—51.75

—50.37

—47.82

—45.64

—28.05

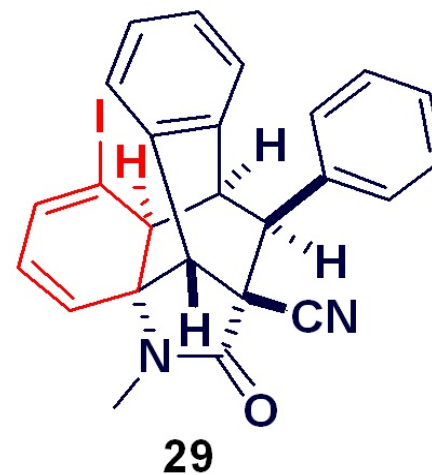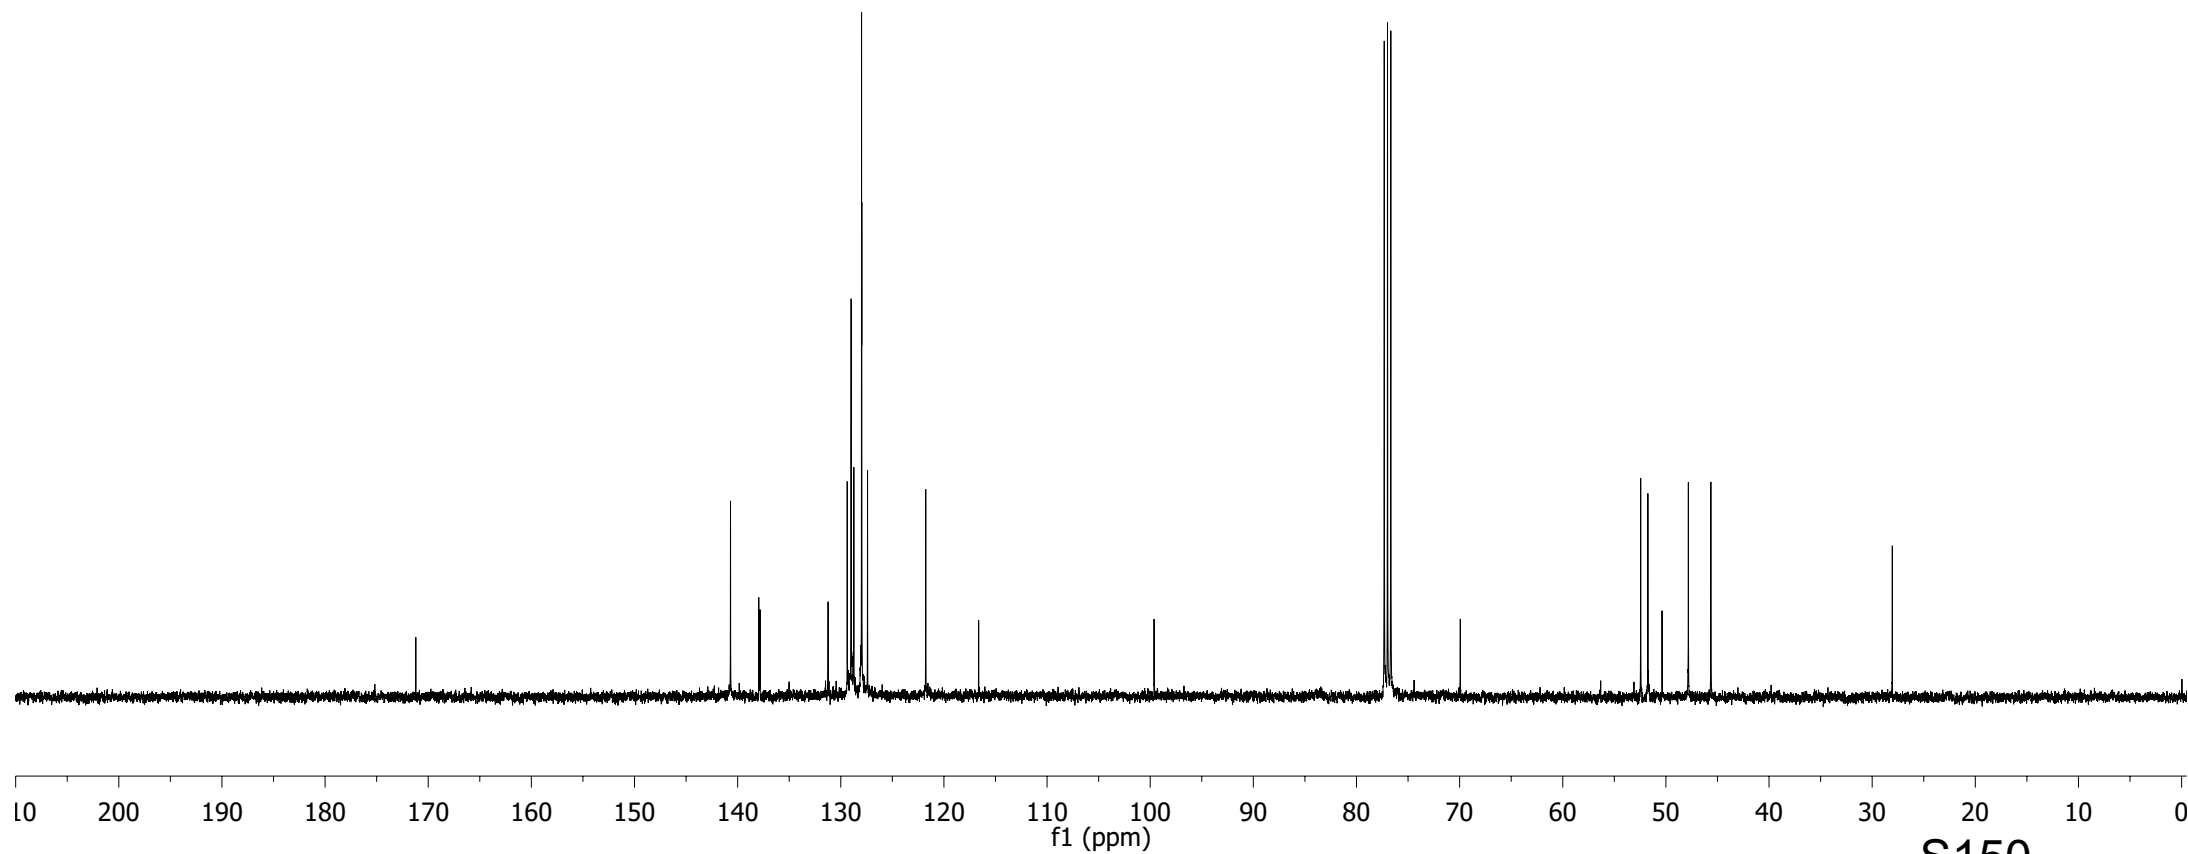

Solvent  $\text{CDCl}_3$   
 Spectrometer Frequency 400

7.97 7.97 7.90 7.90 7.89 7.88 7.42 7.40 7.32 7.31 7.26 7.26 7.25 6.53 6.37 6.34 6.19 5.40 5.38 4.75 4.54 3.95 3.91 3.91 3.88 3.83 3.72 3.69 3.66 3.64 3.49 3.47 3.36 3.32 2.81 2.77 2.17 1.58 1.43 1.41 1.31 1.29 1.25 1.23 1.20 0.88 0.86 0.00

7.97 7.97 7.90 7.90 7.89 7.88 7.51 7.51 7.50 7.49 7.48 7.47 7.46 7.45 7.45 7.42 7.41 7.40 7.35 7.34 7.32 7.32 7.31 7.31 7.30 7.29 7.27 7.26 7.26 7.26 7.25 7.24 7.23 7.22 7.20 7.17 6.97 6.96 6.95 6.94

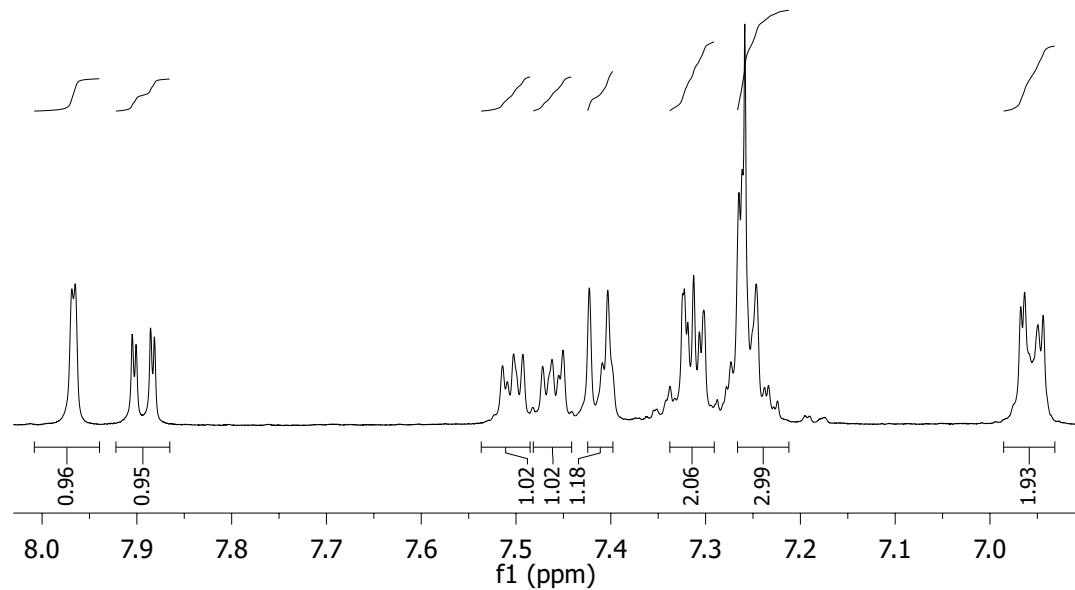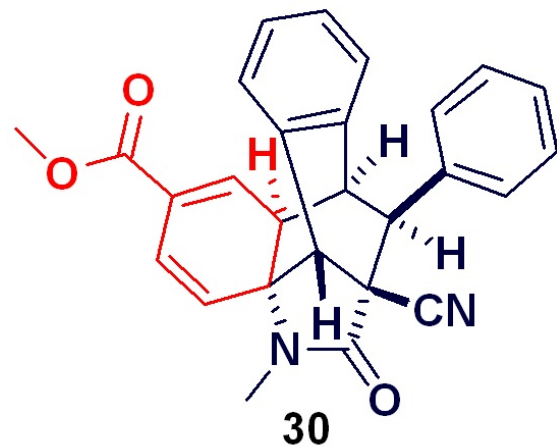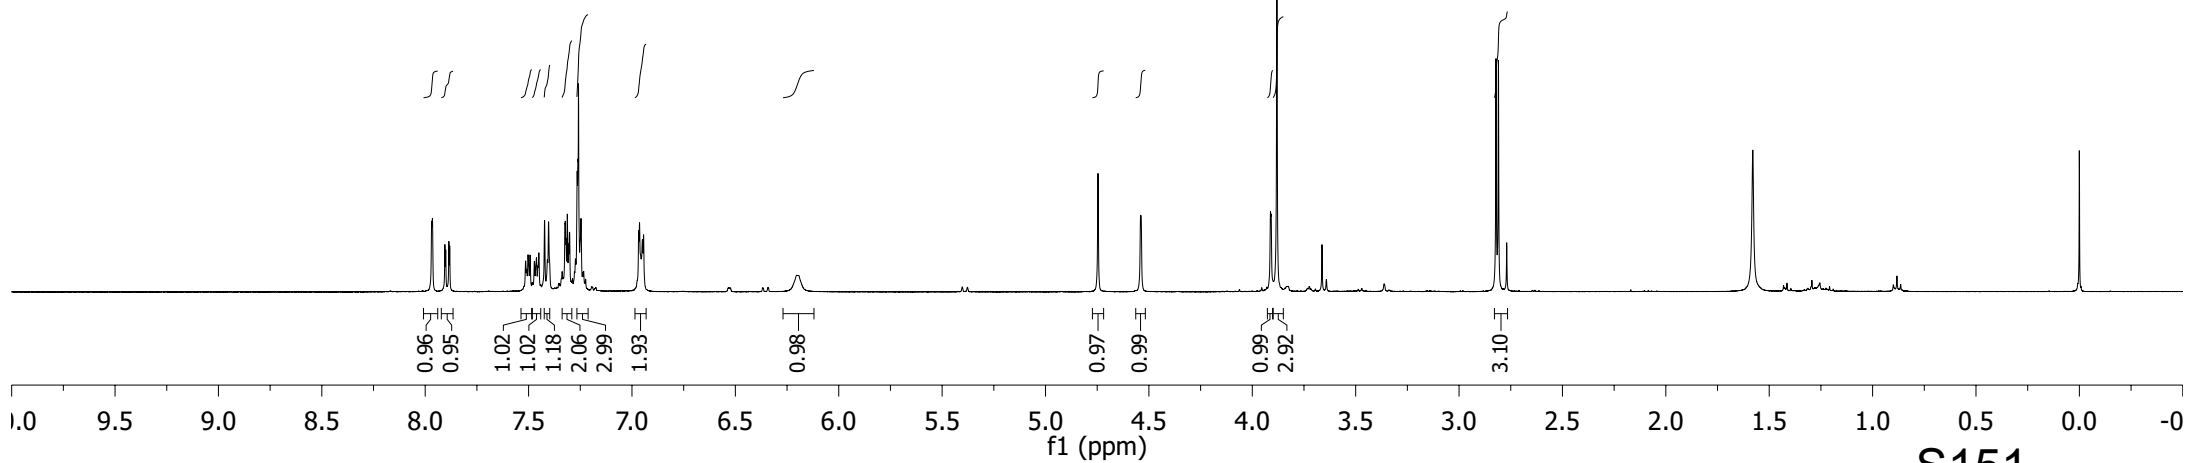

S151

Solvent  $\text{CDCl}_3$   
Spectrometer Frequency 100

166.82  
166.30

144.71  
142.54  
140.28  
139.67  
138.57  
128.84  
128.73  
128.61  
128.17  
128.12  
127.69  
127.17  
126.55  
126.35  
125.68  
123.68  
119.38

77.31  
76.99  
76.68

56.32  
53.11  
52.42  
52.09  
49.53

27.44

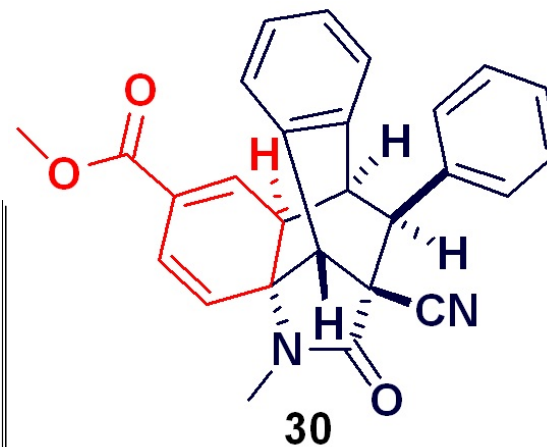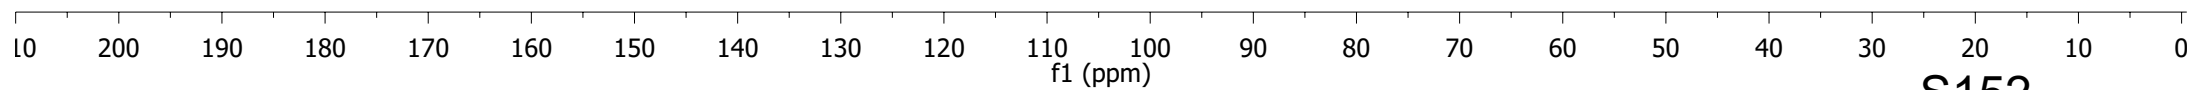

S152

Solvent  $\text{CDCl}_3$   
Spectrometer Frequency 400

7.45  
7.44  
7.42  
7.39  
7.37  
7.36  
7.34  
7.33  
7.32  
7.31  
7.30  
7.28  
7.26  
7.00  
6.98

5.46  
5.44

3.74  
3.73  
3.71  
3.70  
3.68  
3.46  
3.44  
3.42  
3.39  
3.28  
3.18  
2.88  
2.86  
2.84  
2.82  
2.65  
2.63  
2.60  
2.58

1.59

-0.00

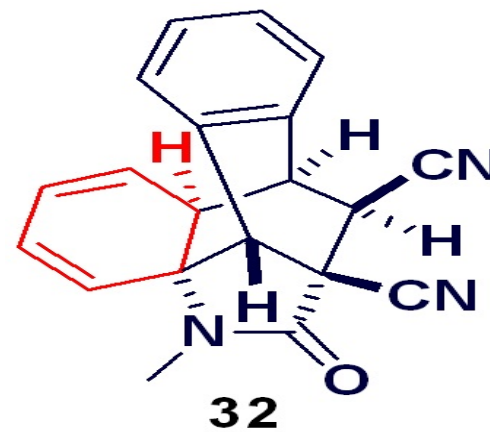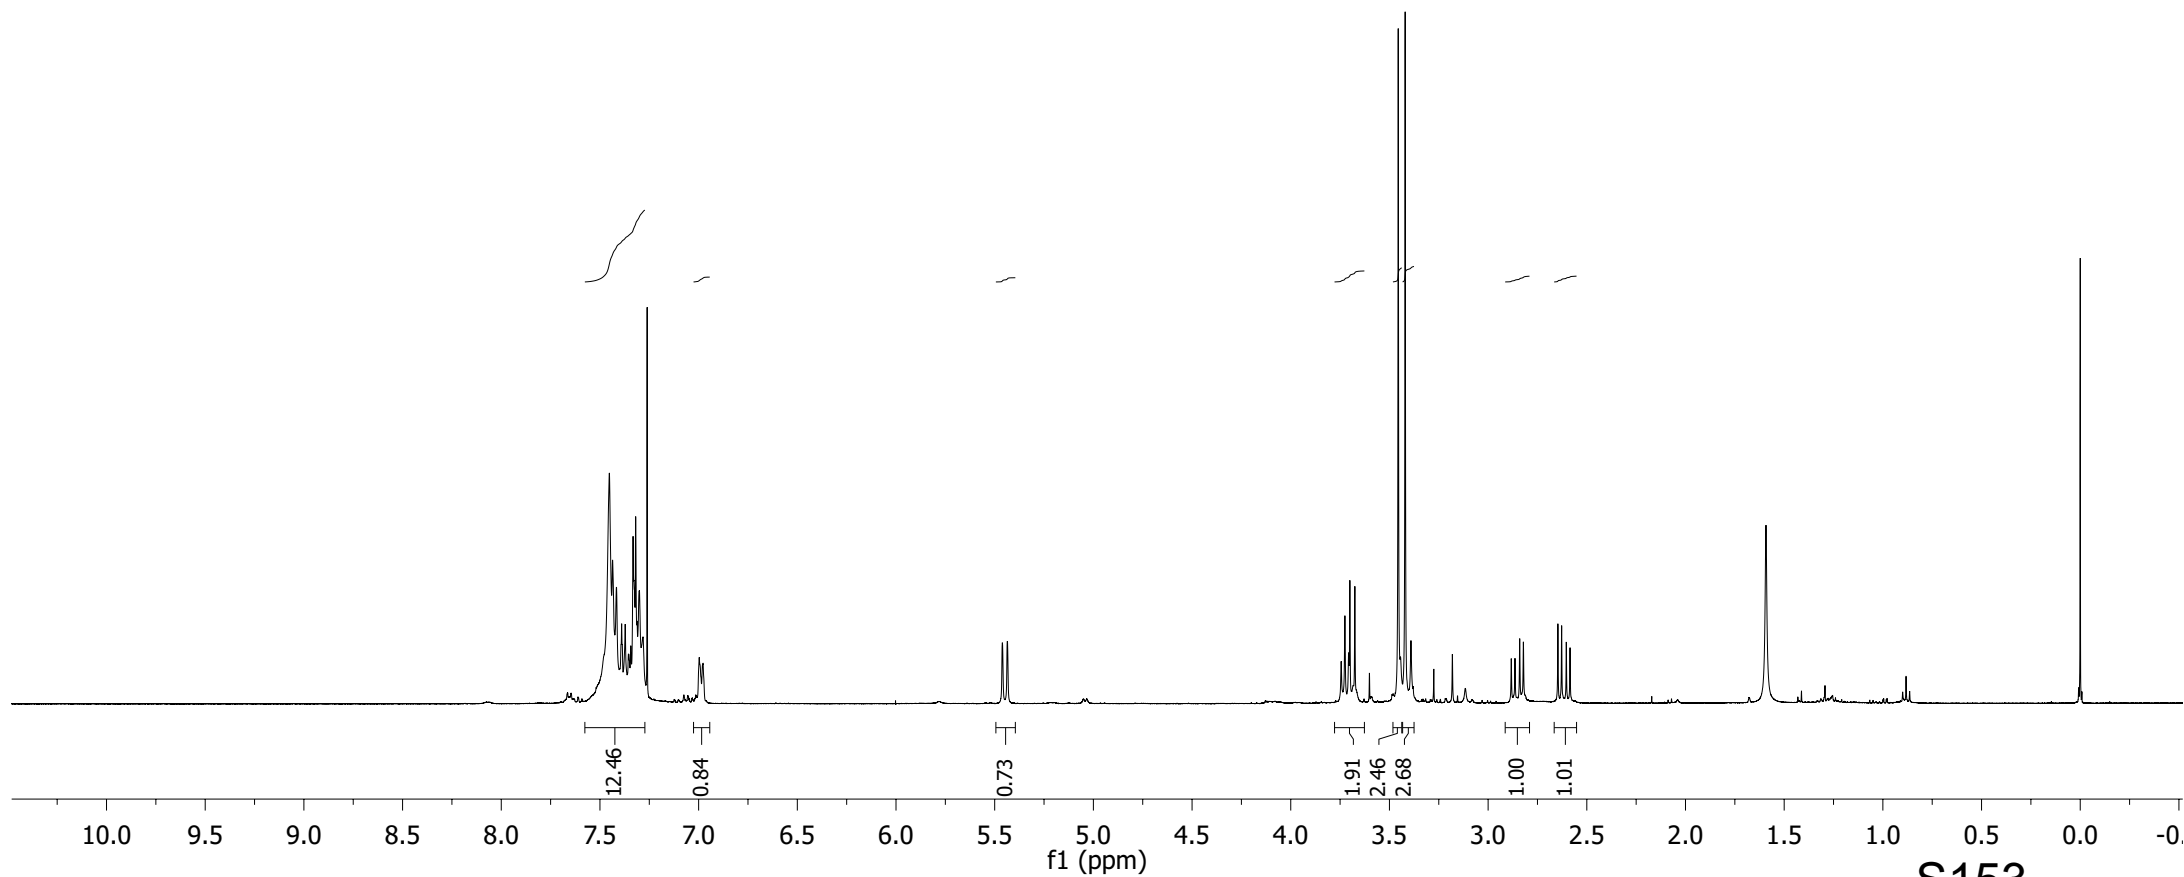

S153

Solvent  $\text{CDCl}_3$   
Spectrometer Frequency 100

162.21  
161.62  
141.63  
141.30  
138.81  
137.73  
130.60  
129.86  
129.67  
129.41  
129.18  
127.31  
116.08  
114.72

77.31  
76.99  
76.67

56.00  
50.93  
49.89  
40.92  
38.75  
37.08

21.36

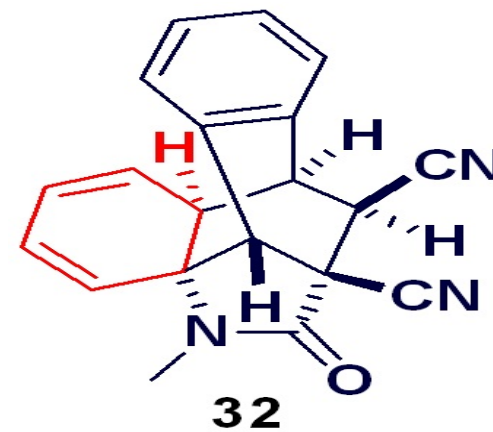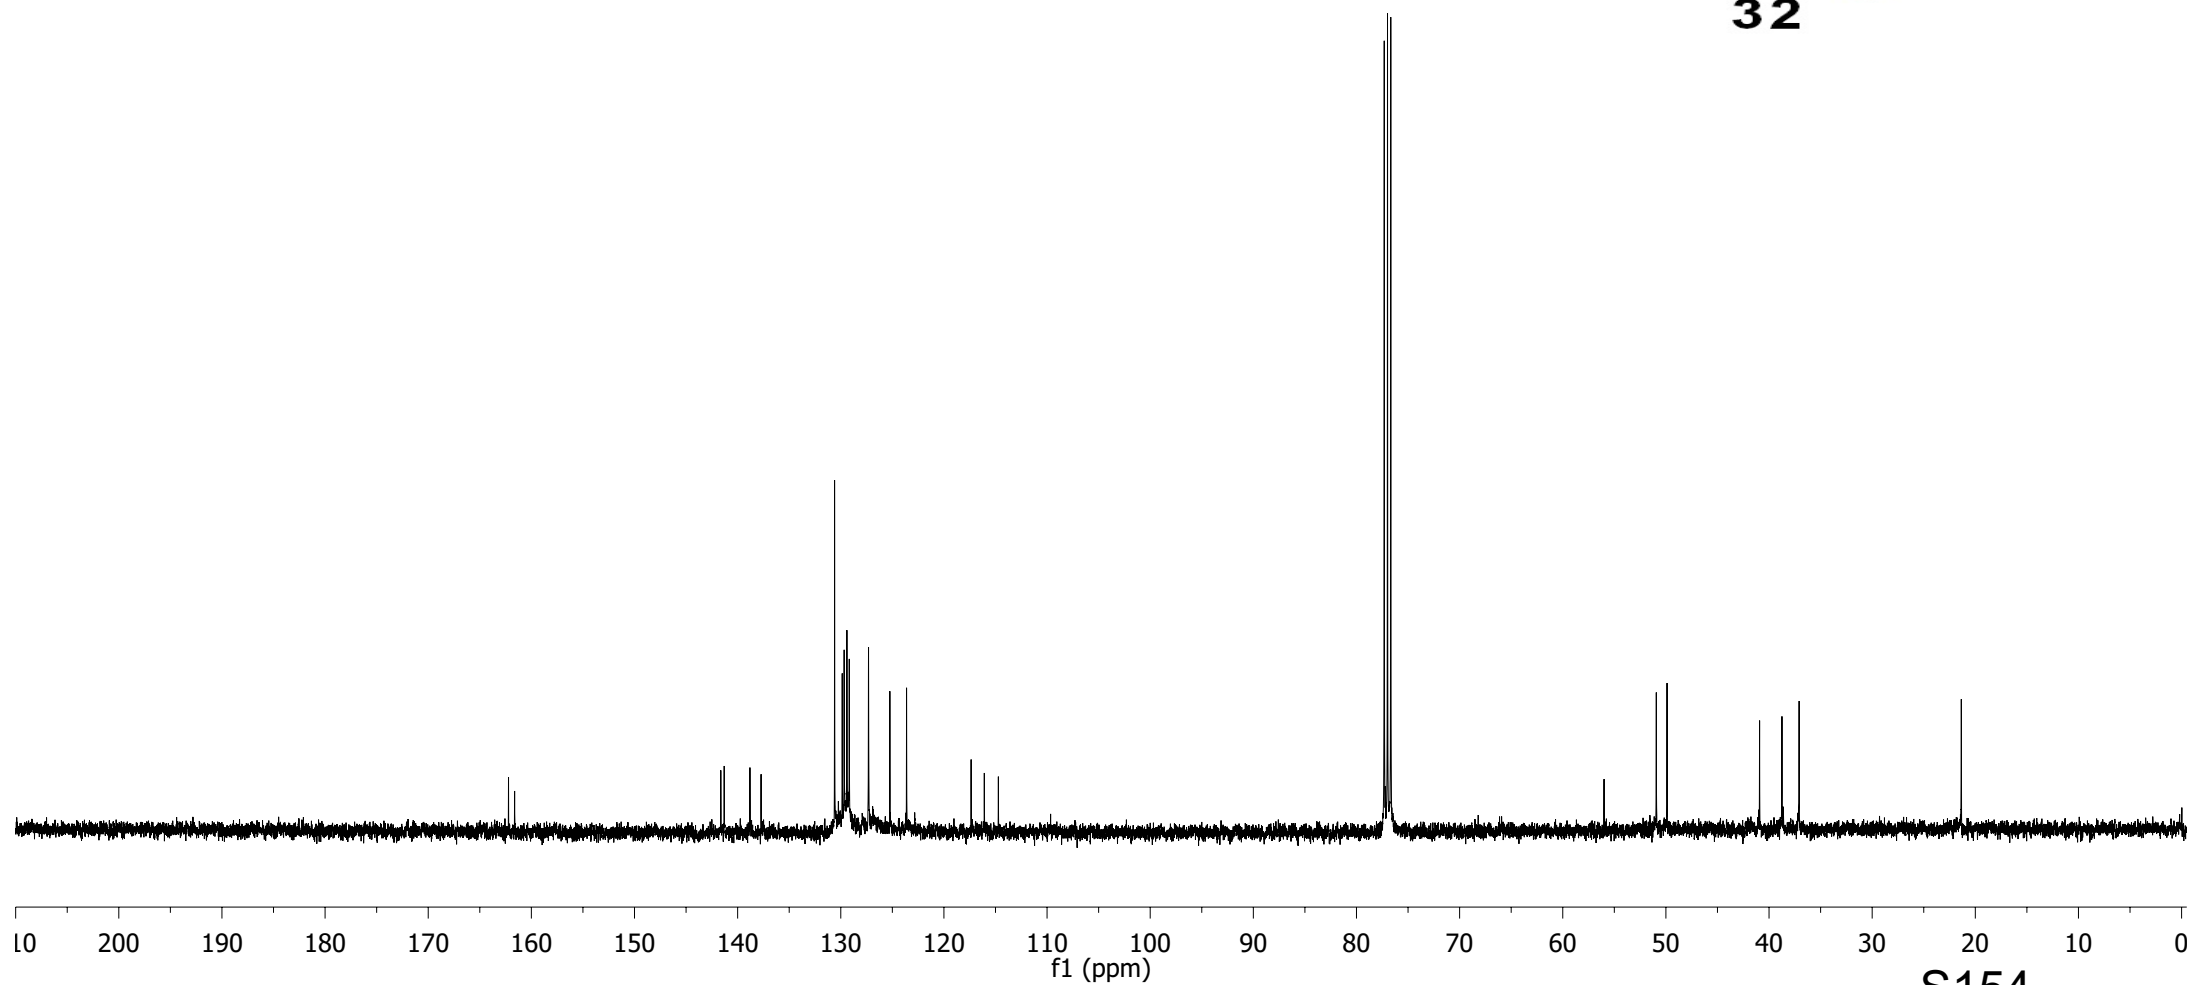

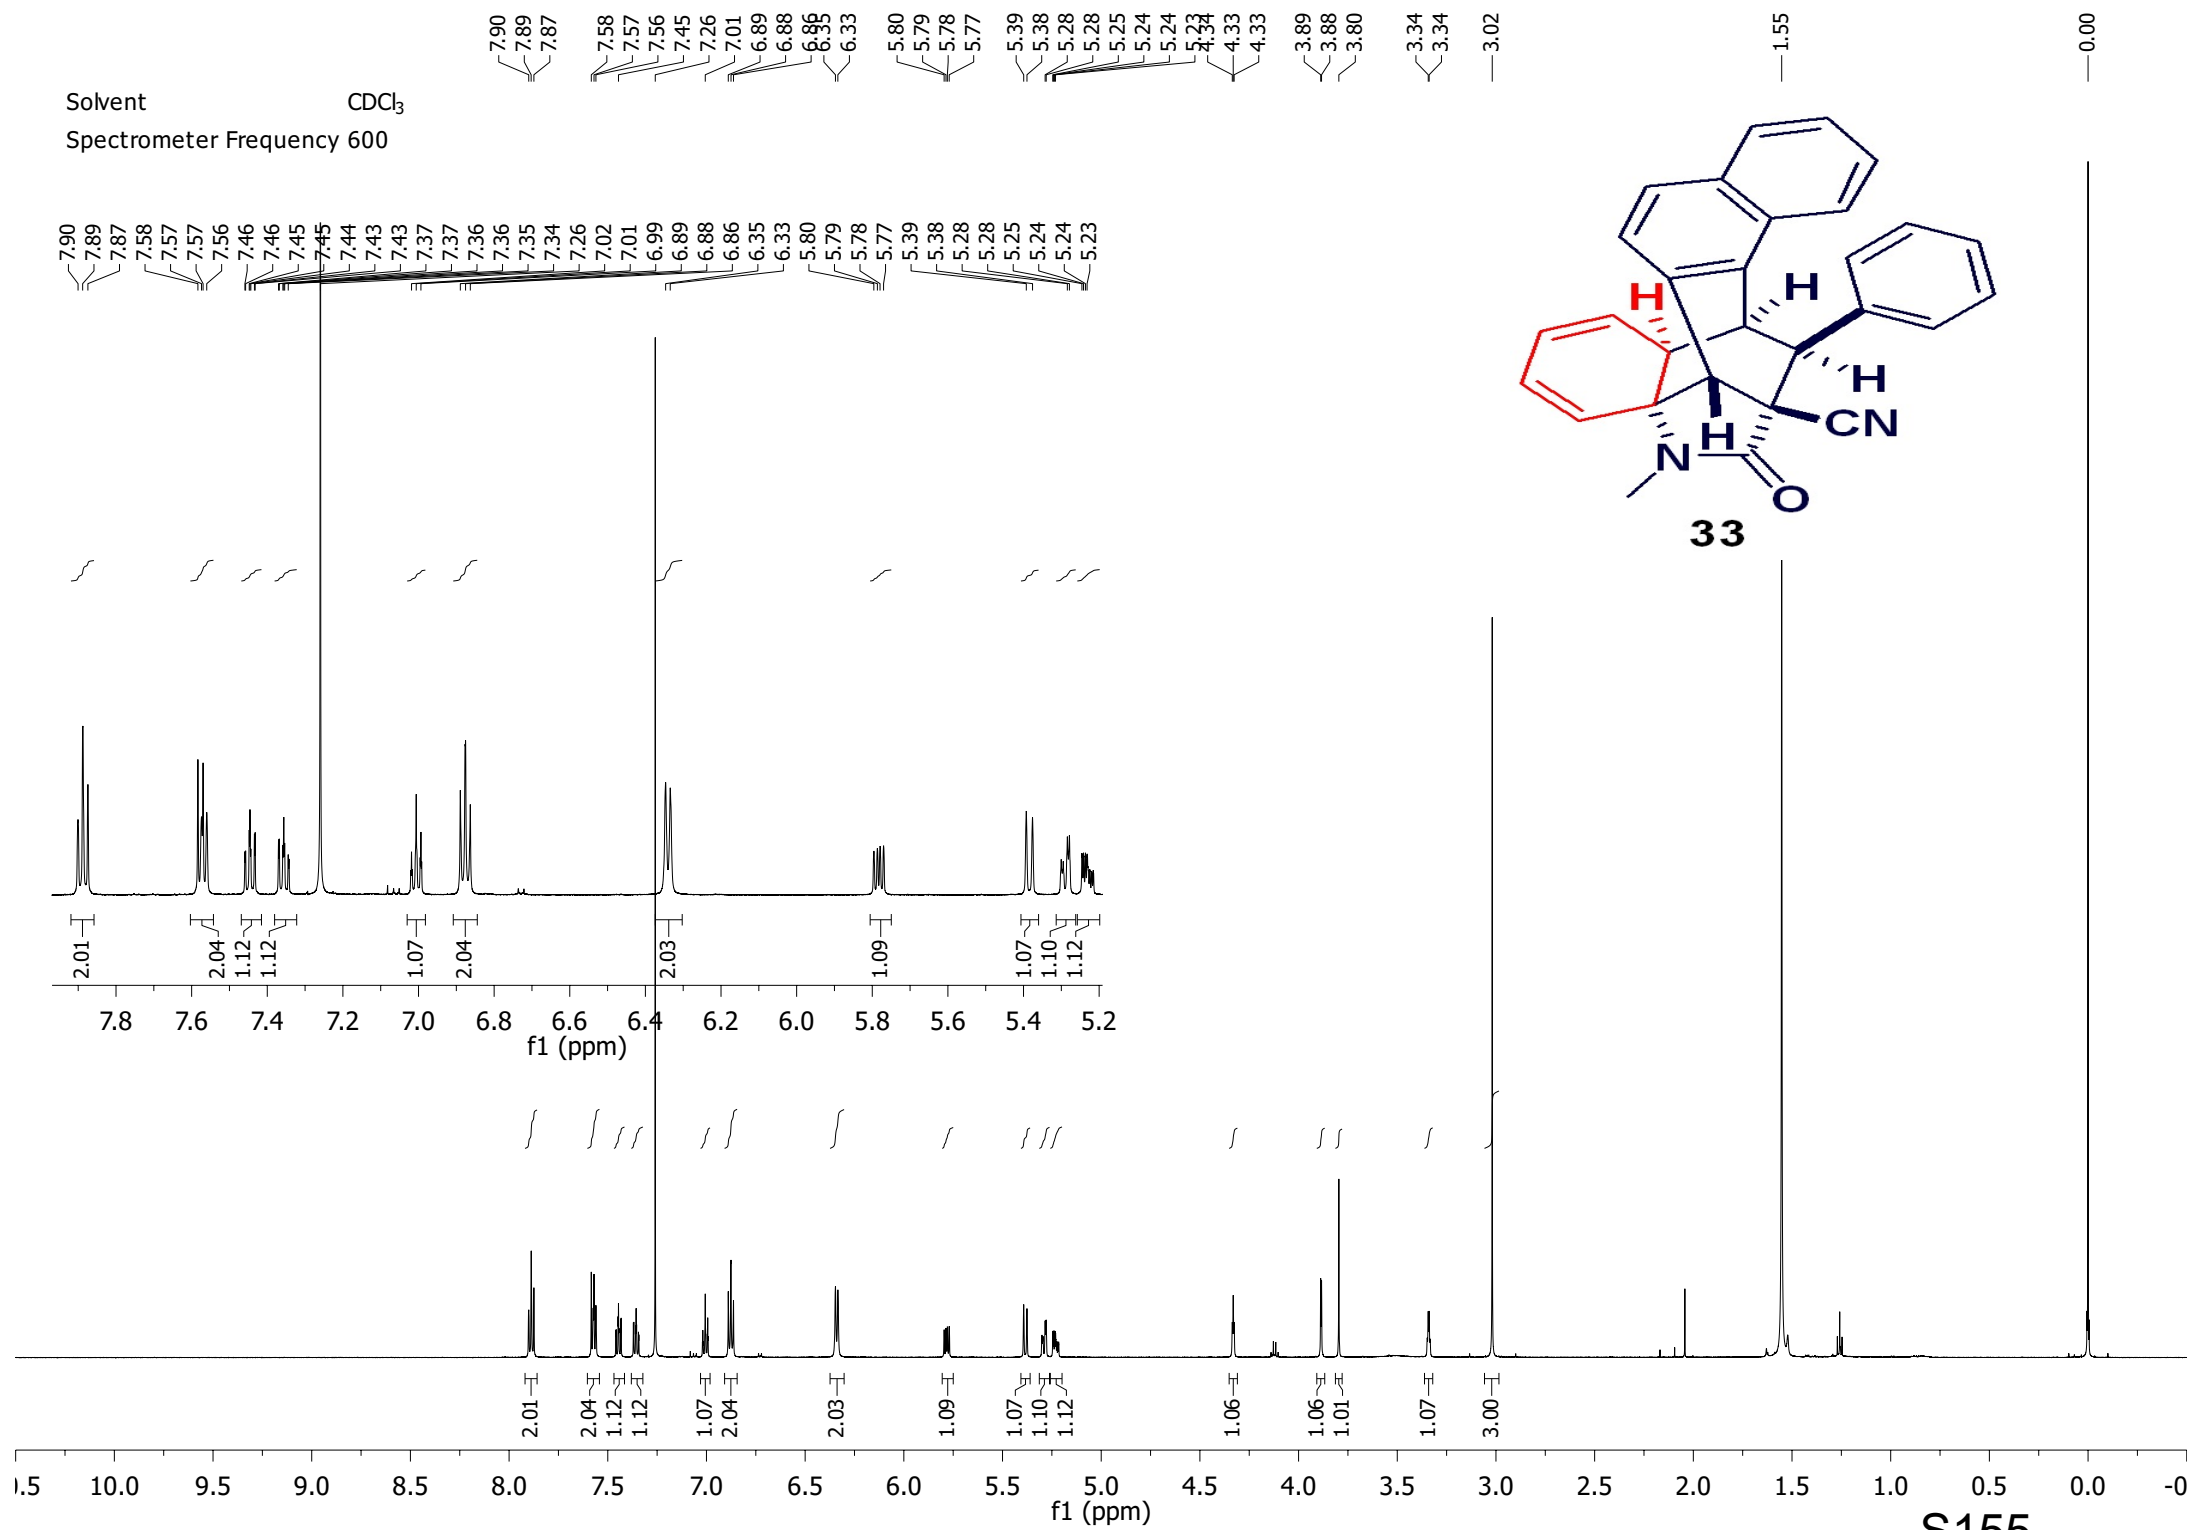

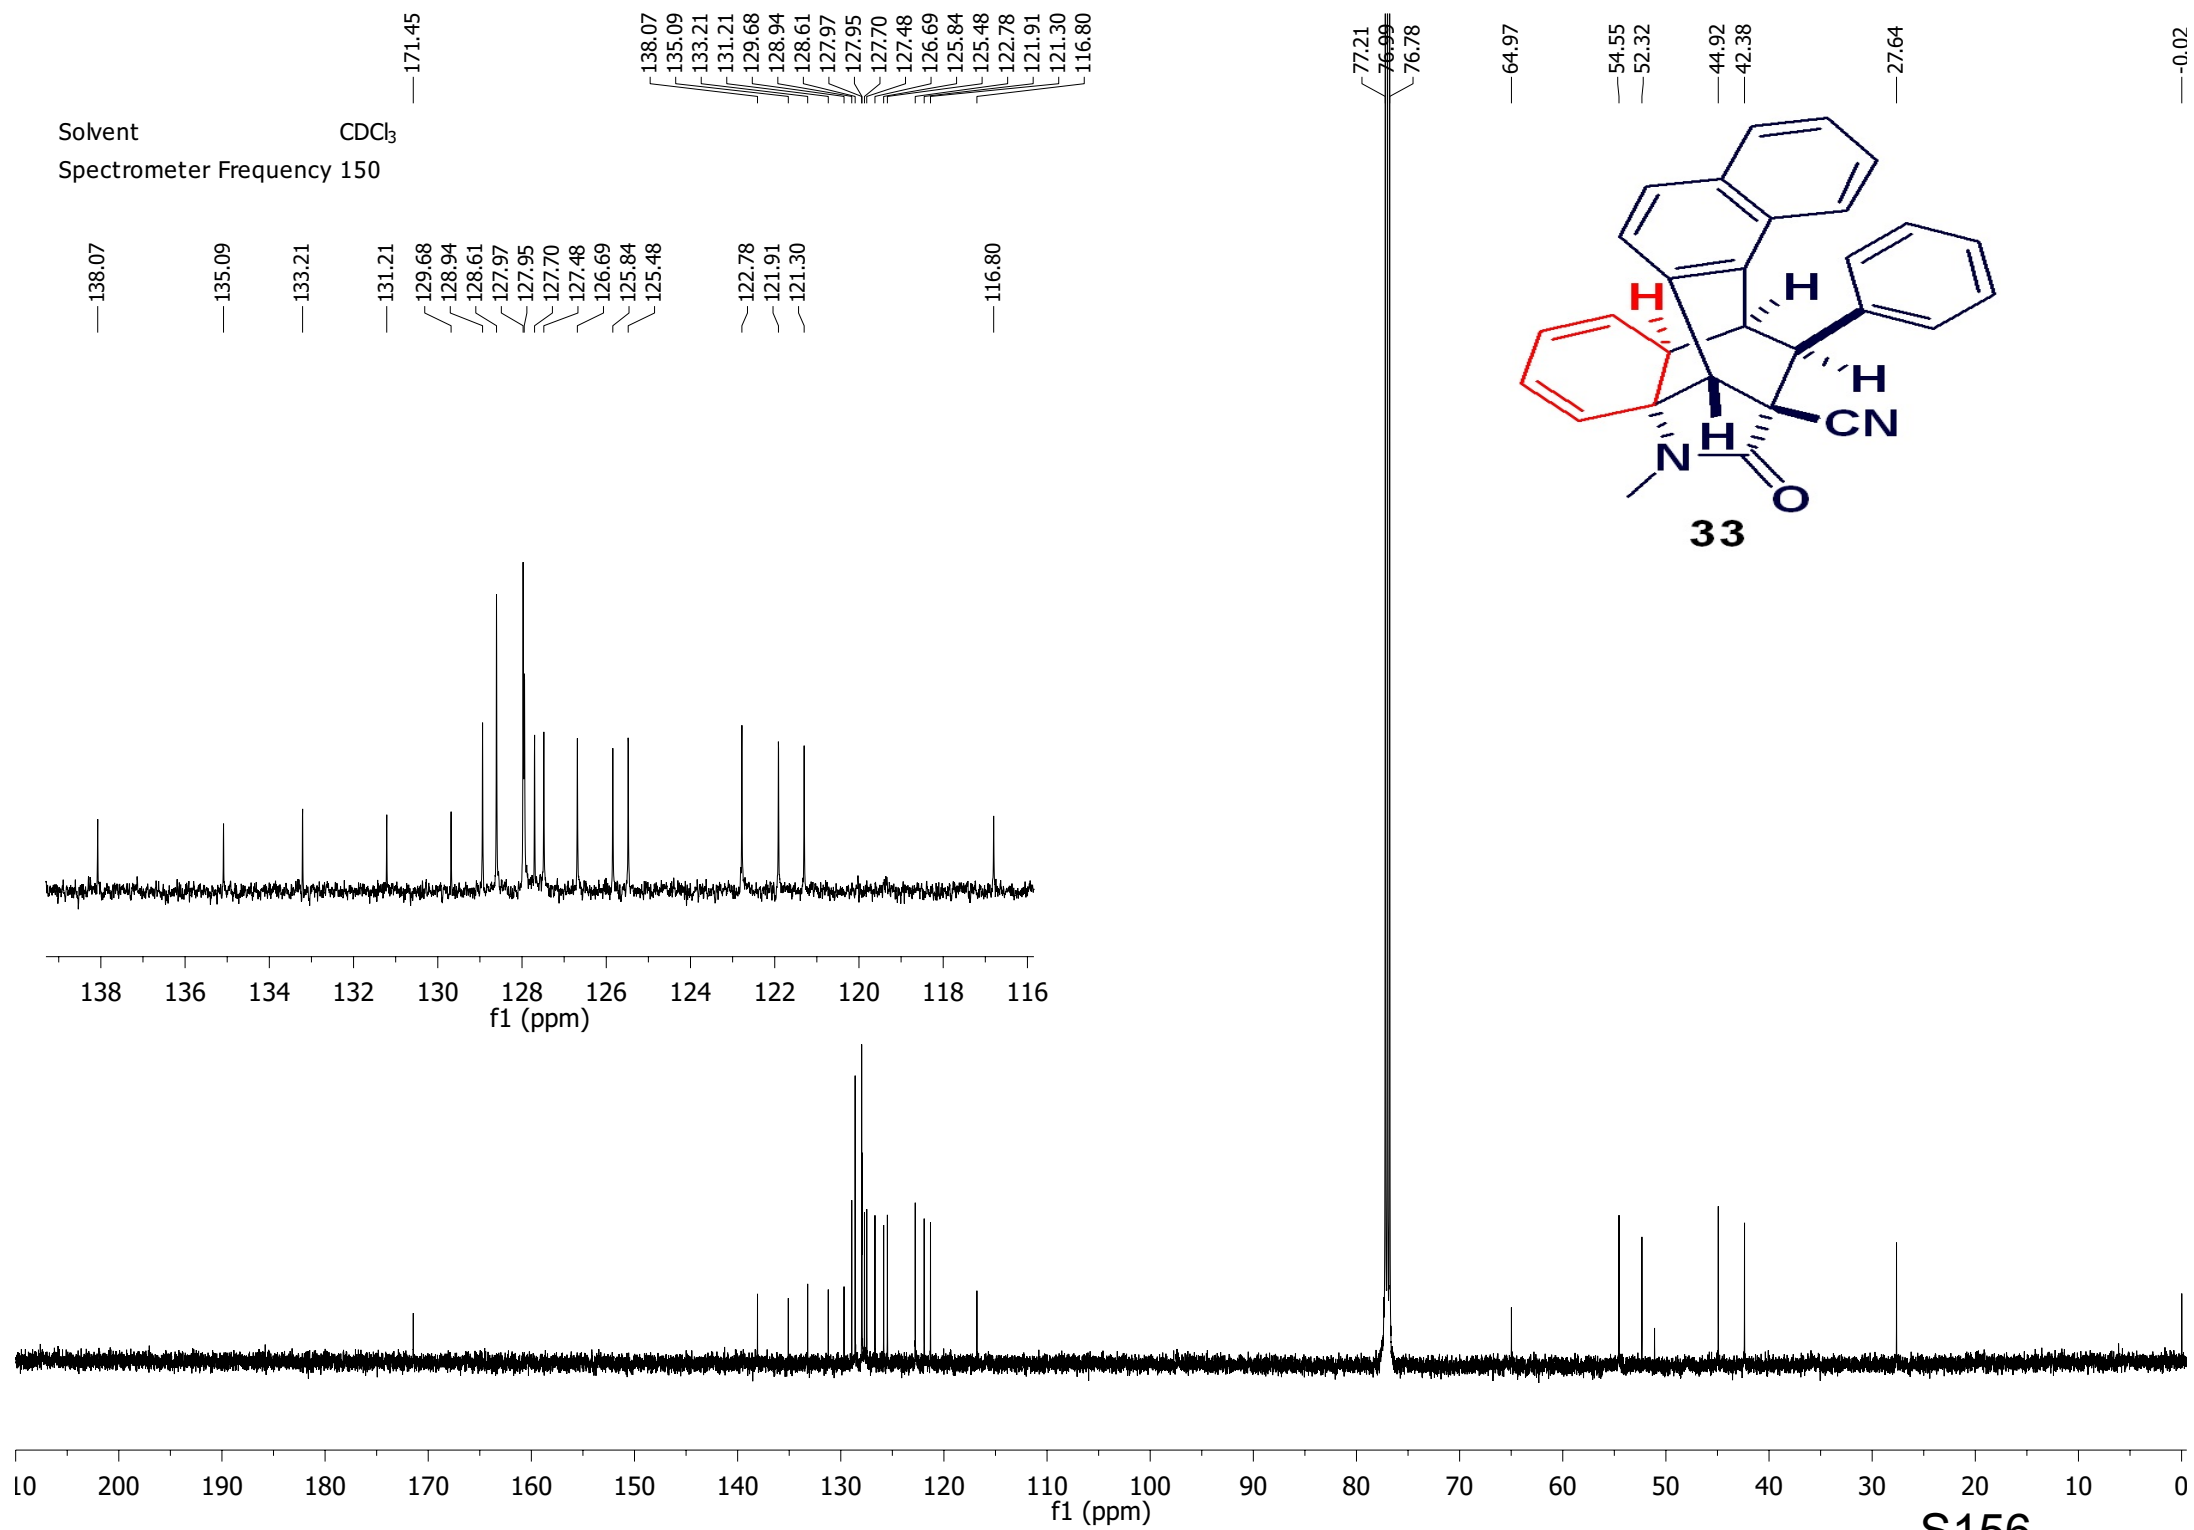

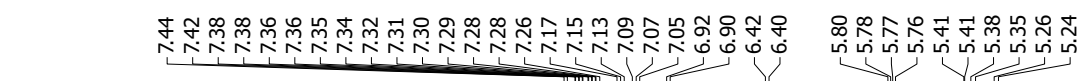

Solvent  $\text{CDCl}_3$   
Spectrometer Frequency 400

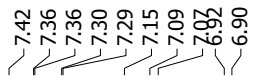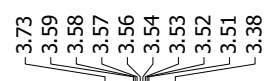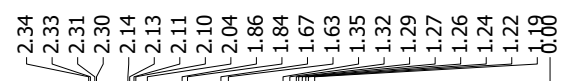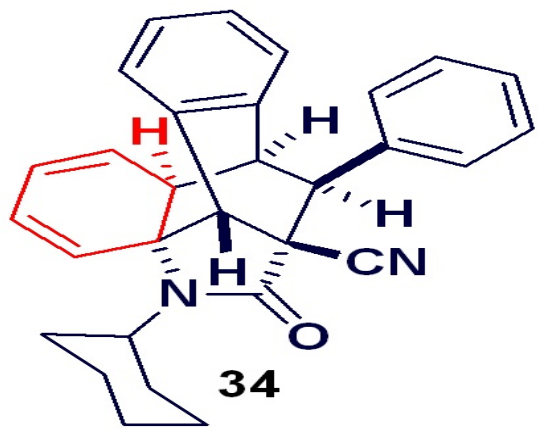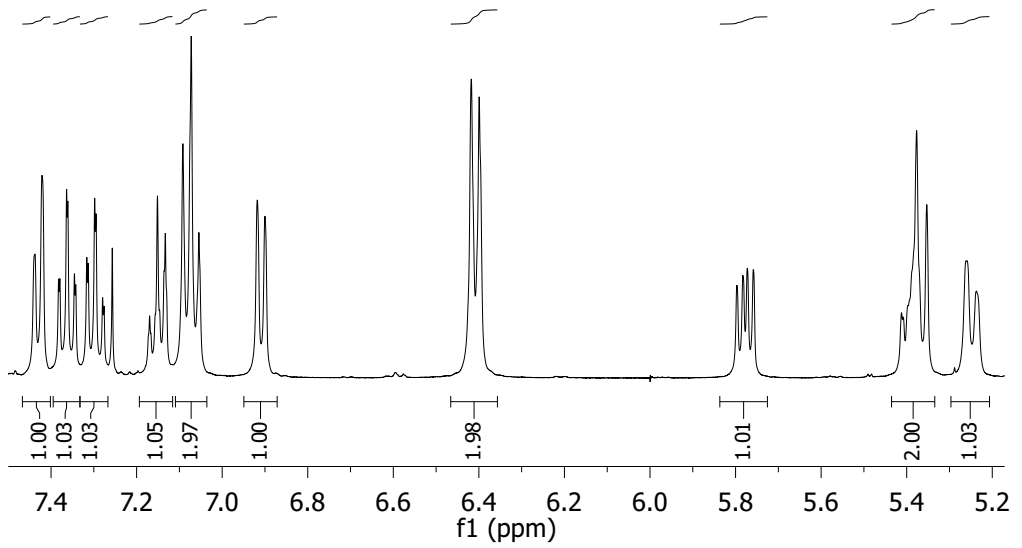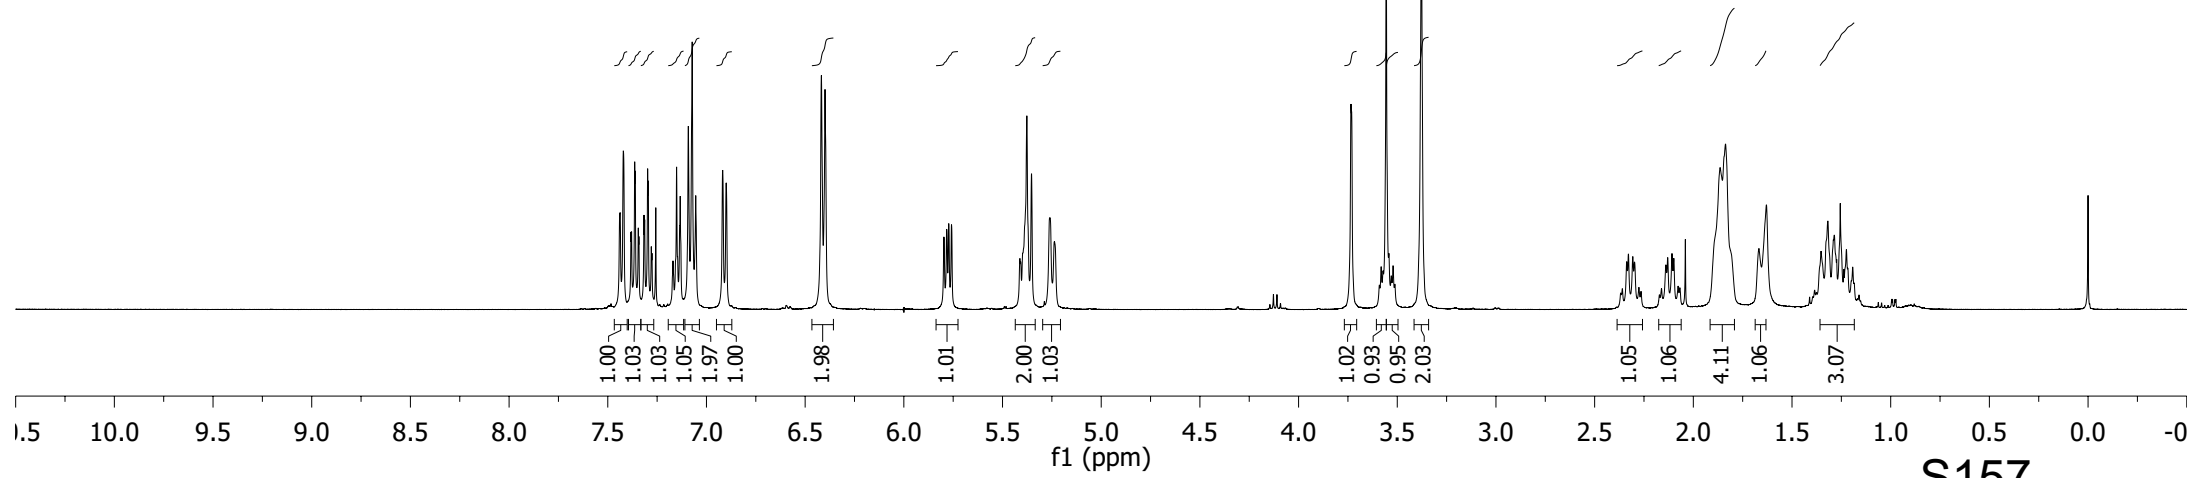

Solvent  $\text{CDCl}_3$   
Spectrometer Frequency 100

—170.87

138.53  
137.74  
132.35  
129.03  
128.61  
128.21  
127.87  
127.84  
127.71  
127.41  
127.40  
127.13  
123.81  
120.83  
117.07

77.31  
76.99  
76.67

—66.17

55.04  
54.46  
51.59  
51.48  
47.32  
46.99

31.21  
30.80  
26.11  
26.07  
25.08

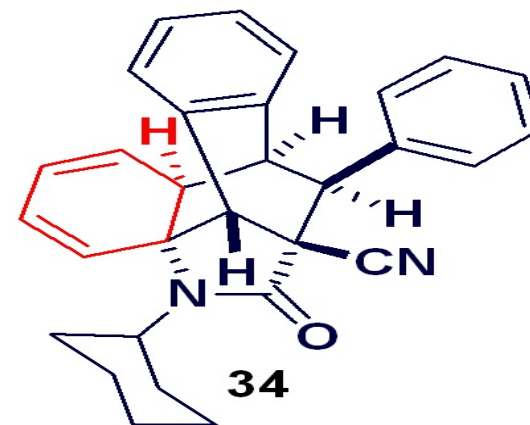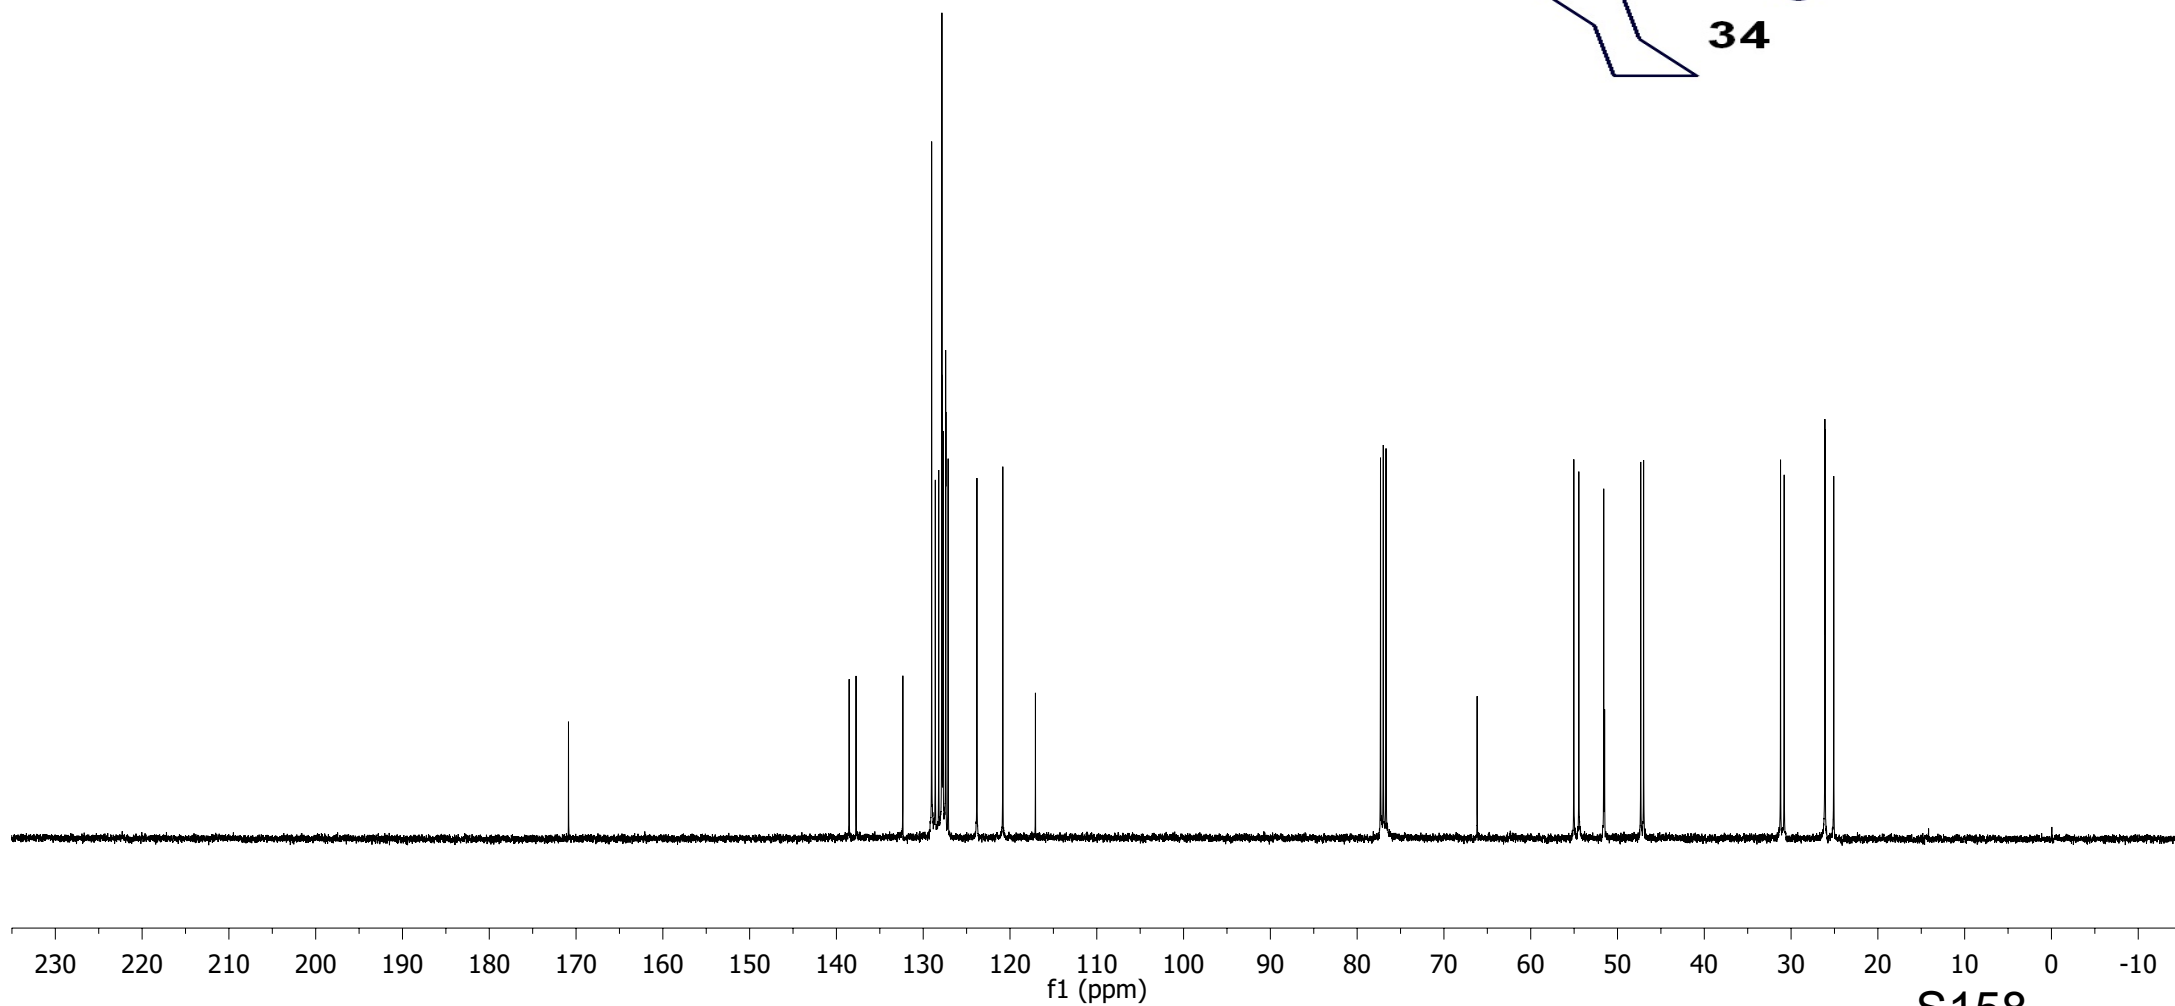

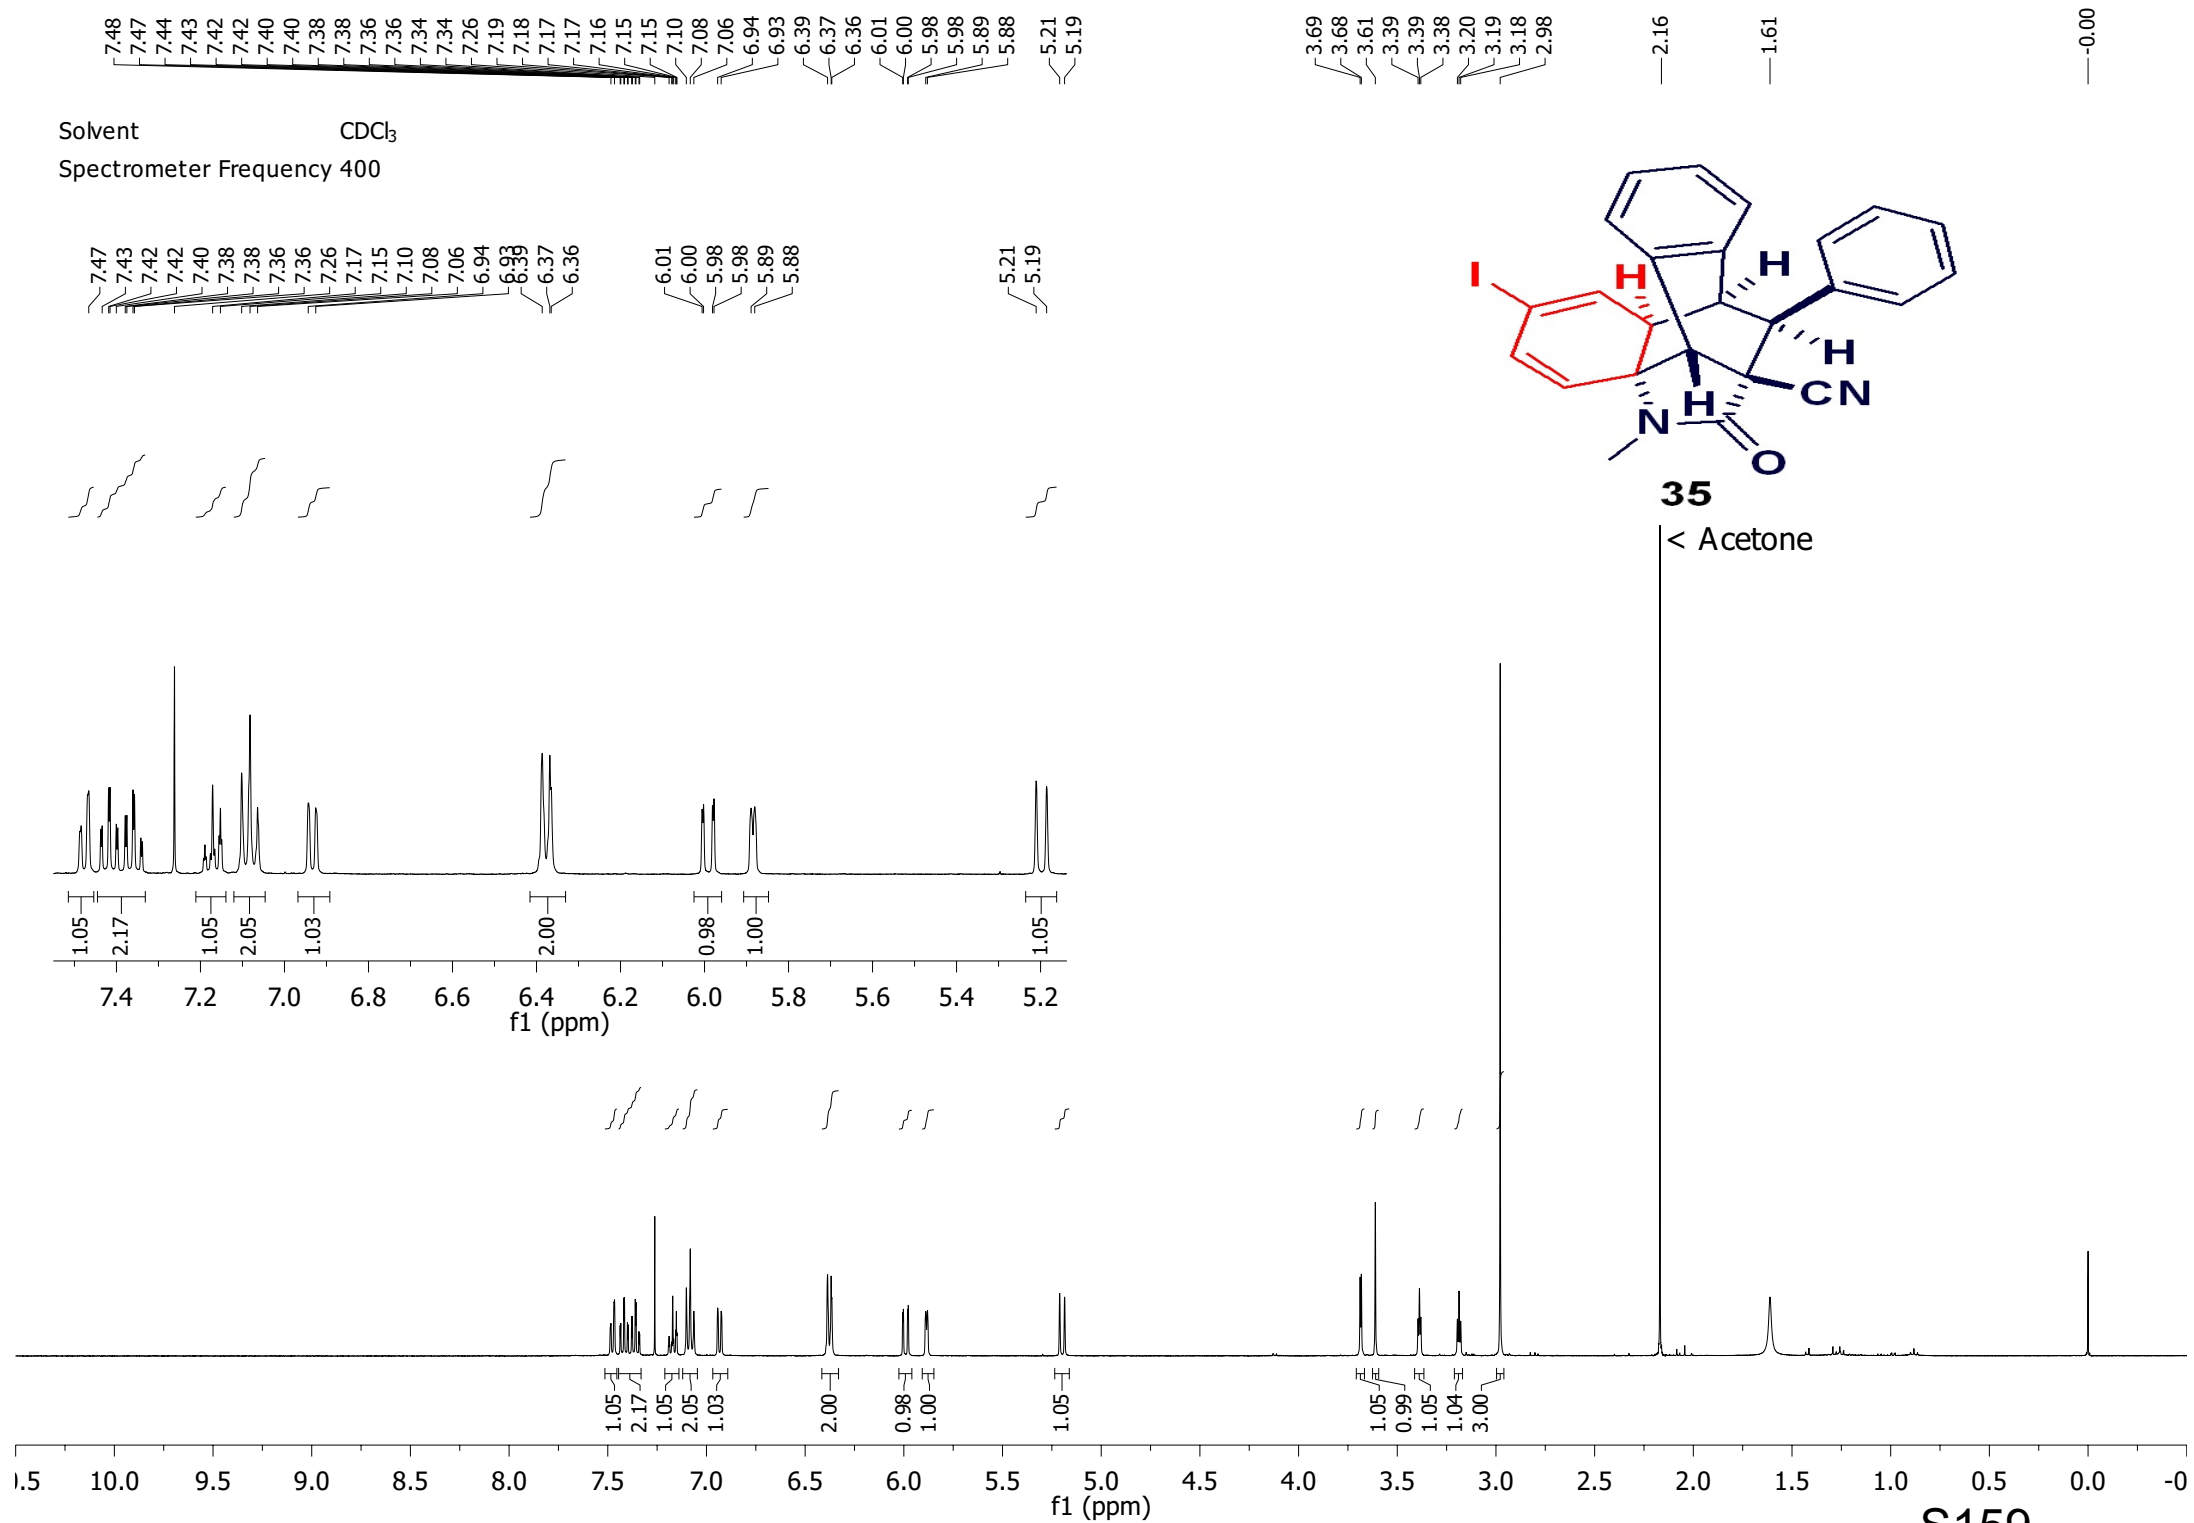

Solvent

$\text{CDCl}_3$

Spectrometer Frequency 100

— 171.16

137.92

137.22

136.80

136.13

131.43

128.98

128.89

128.05

128.00

127.98

127.94

127.39

124.40

116.50

— 109.97

— 85.62

77.31

76.99

76.67

— 63.21

53.54

51.31

50.77

47.88

47.00

— 30.90

— 27.60

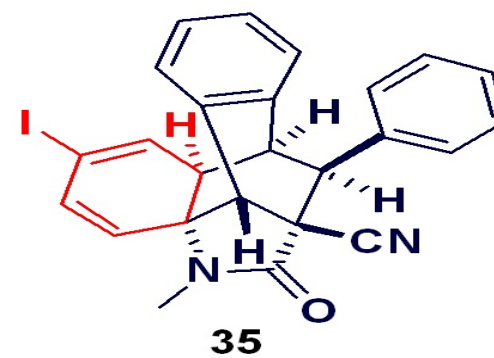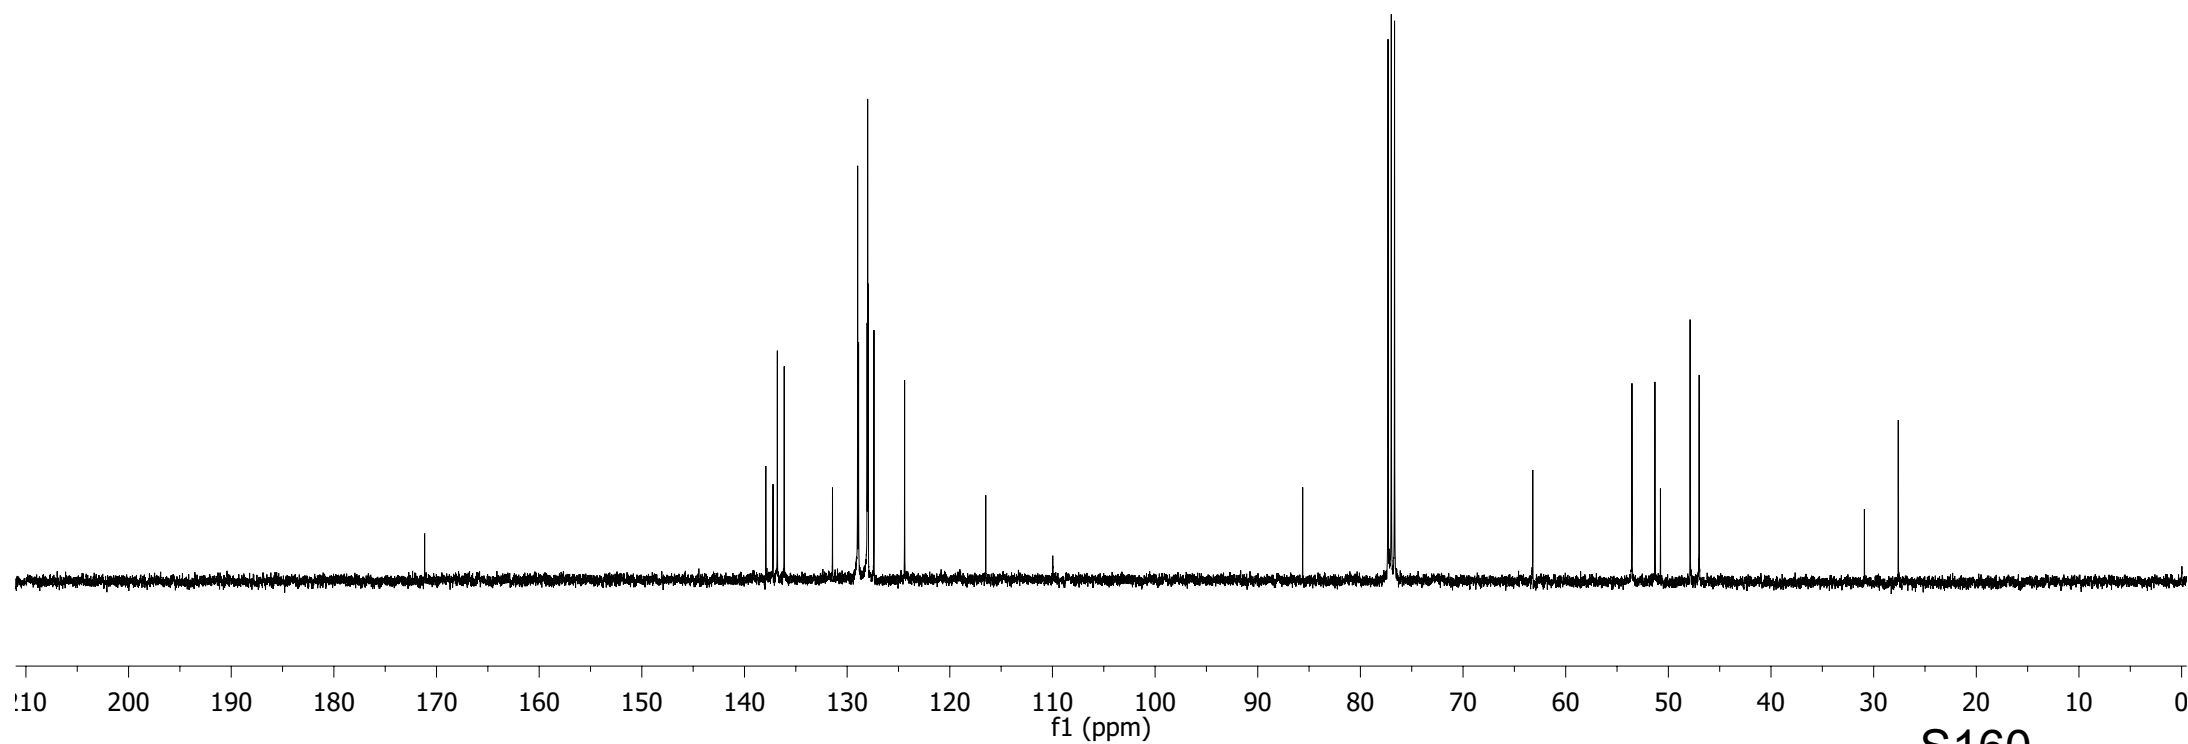

S160

Solvent  $\text{CDCl}_3$   
Spectrometer Frequency 400

7.97  
7.96  
7.91  
7.90  
7.89  
7.88  
7.43  
7.33  
7.27  
7.26  
6.97  
6.96  
6.96  
6.95  
6.94

4.75  
4.54  
4.54

3.91  
3.91  
3.88  
3.66

2.83  
2.81  
2.77

0.00

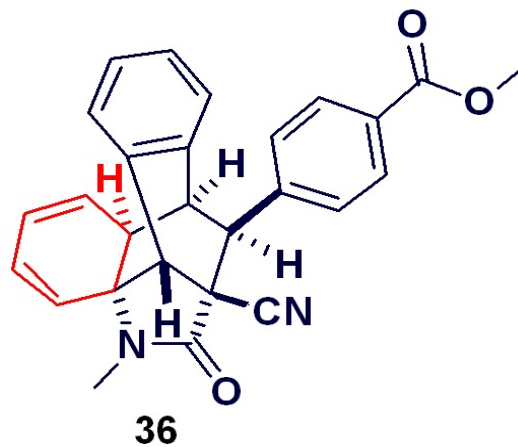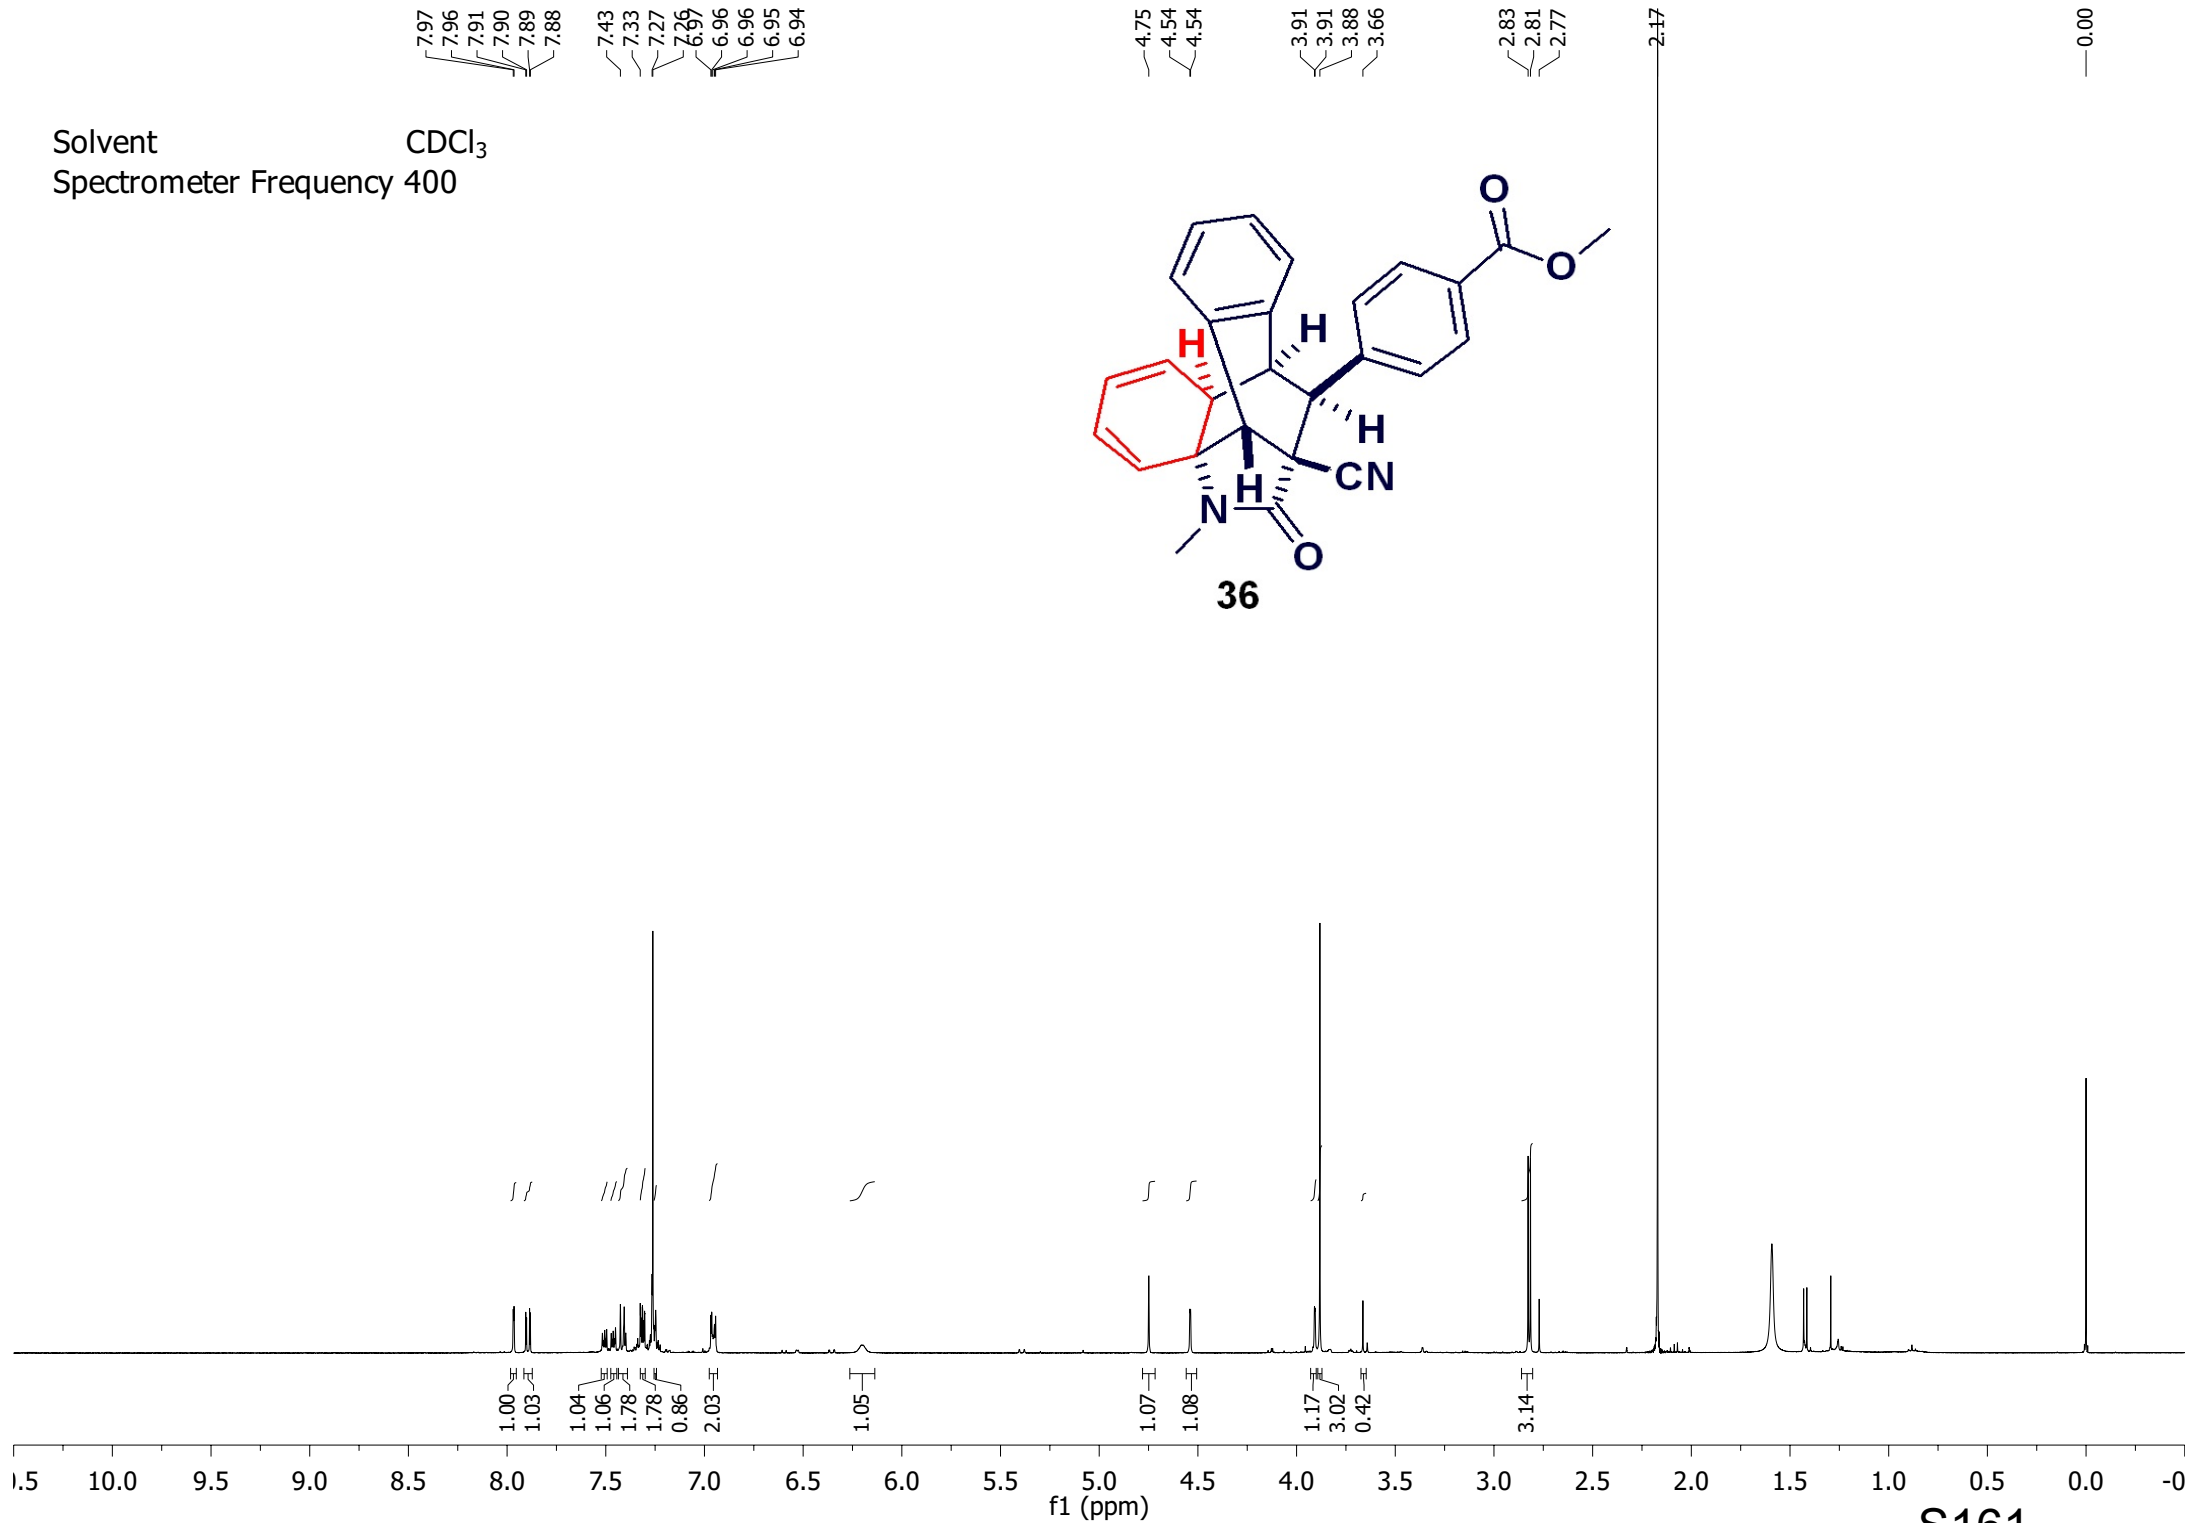

Solvent  $\text{CDCl}_3$   
Spectrometer Frequency 100

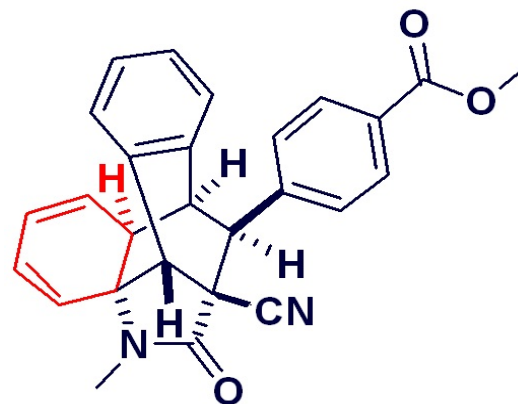

36

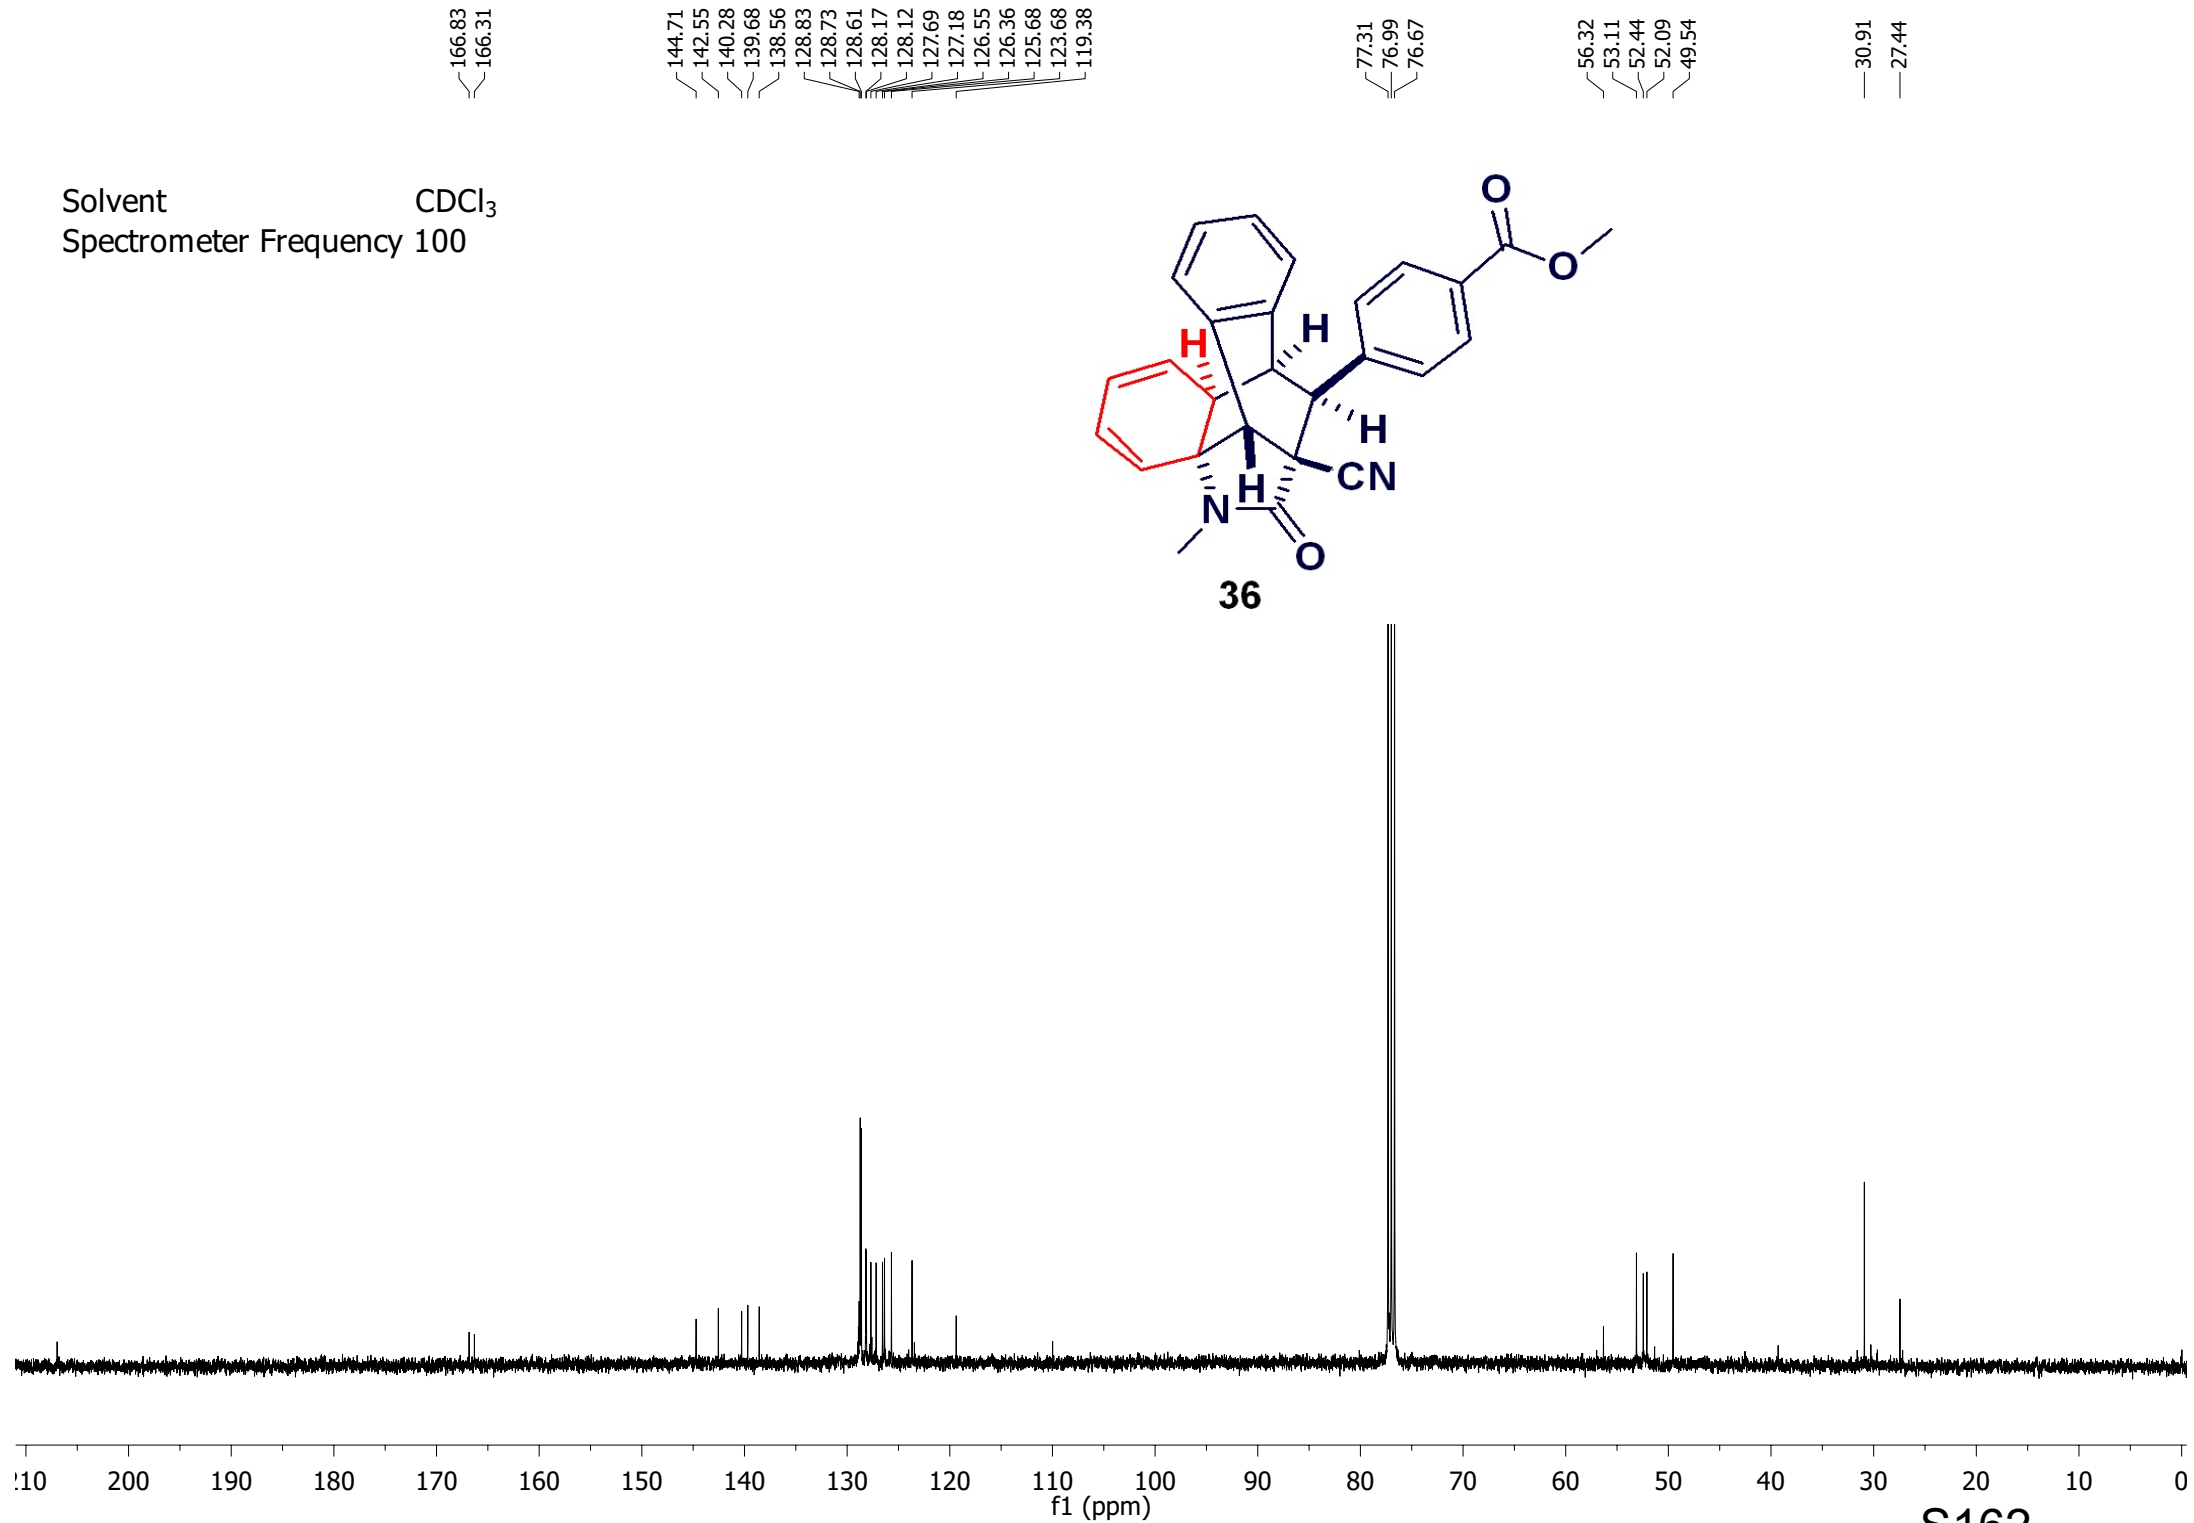

S162

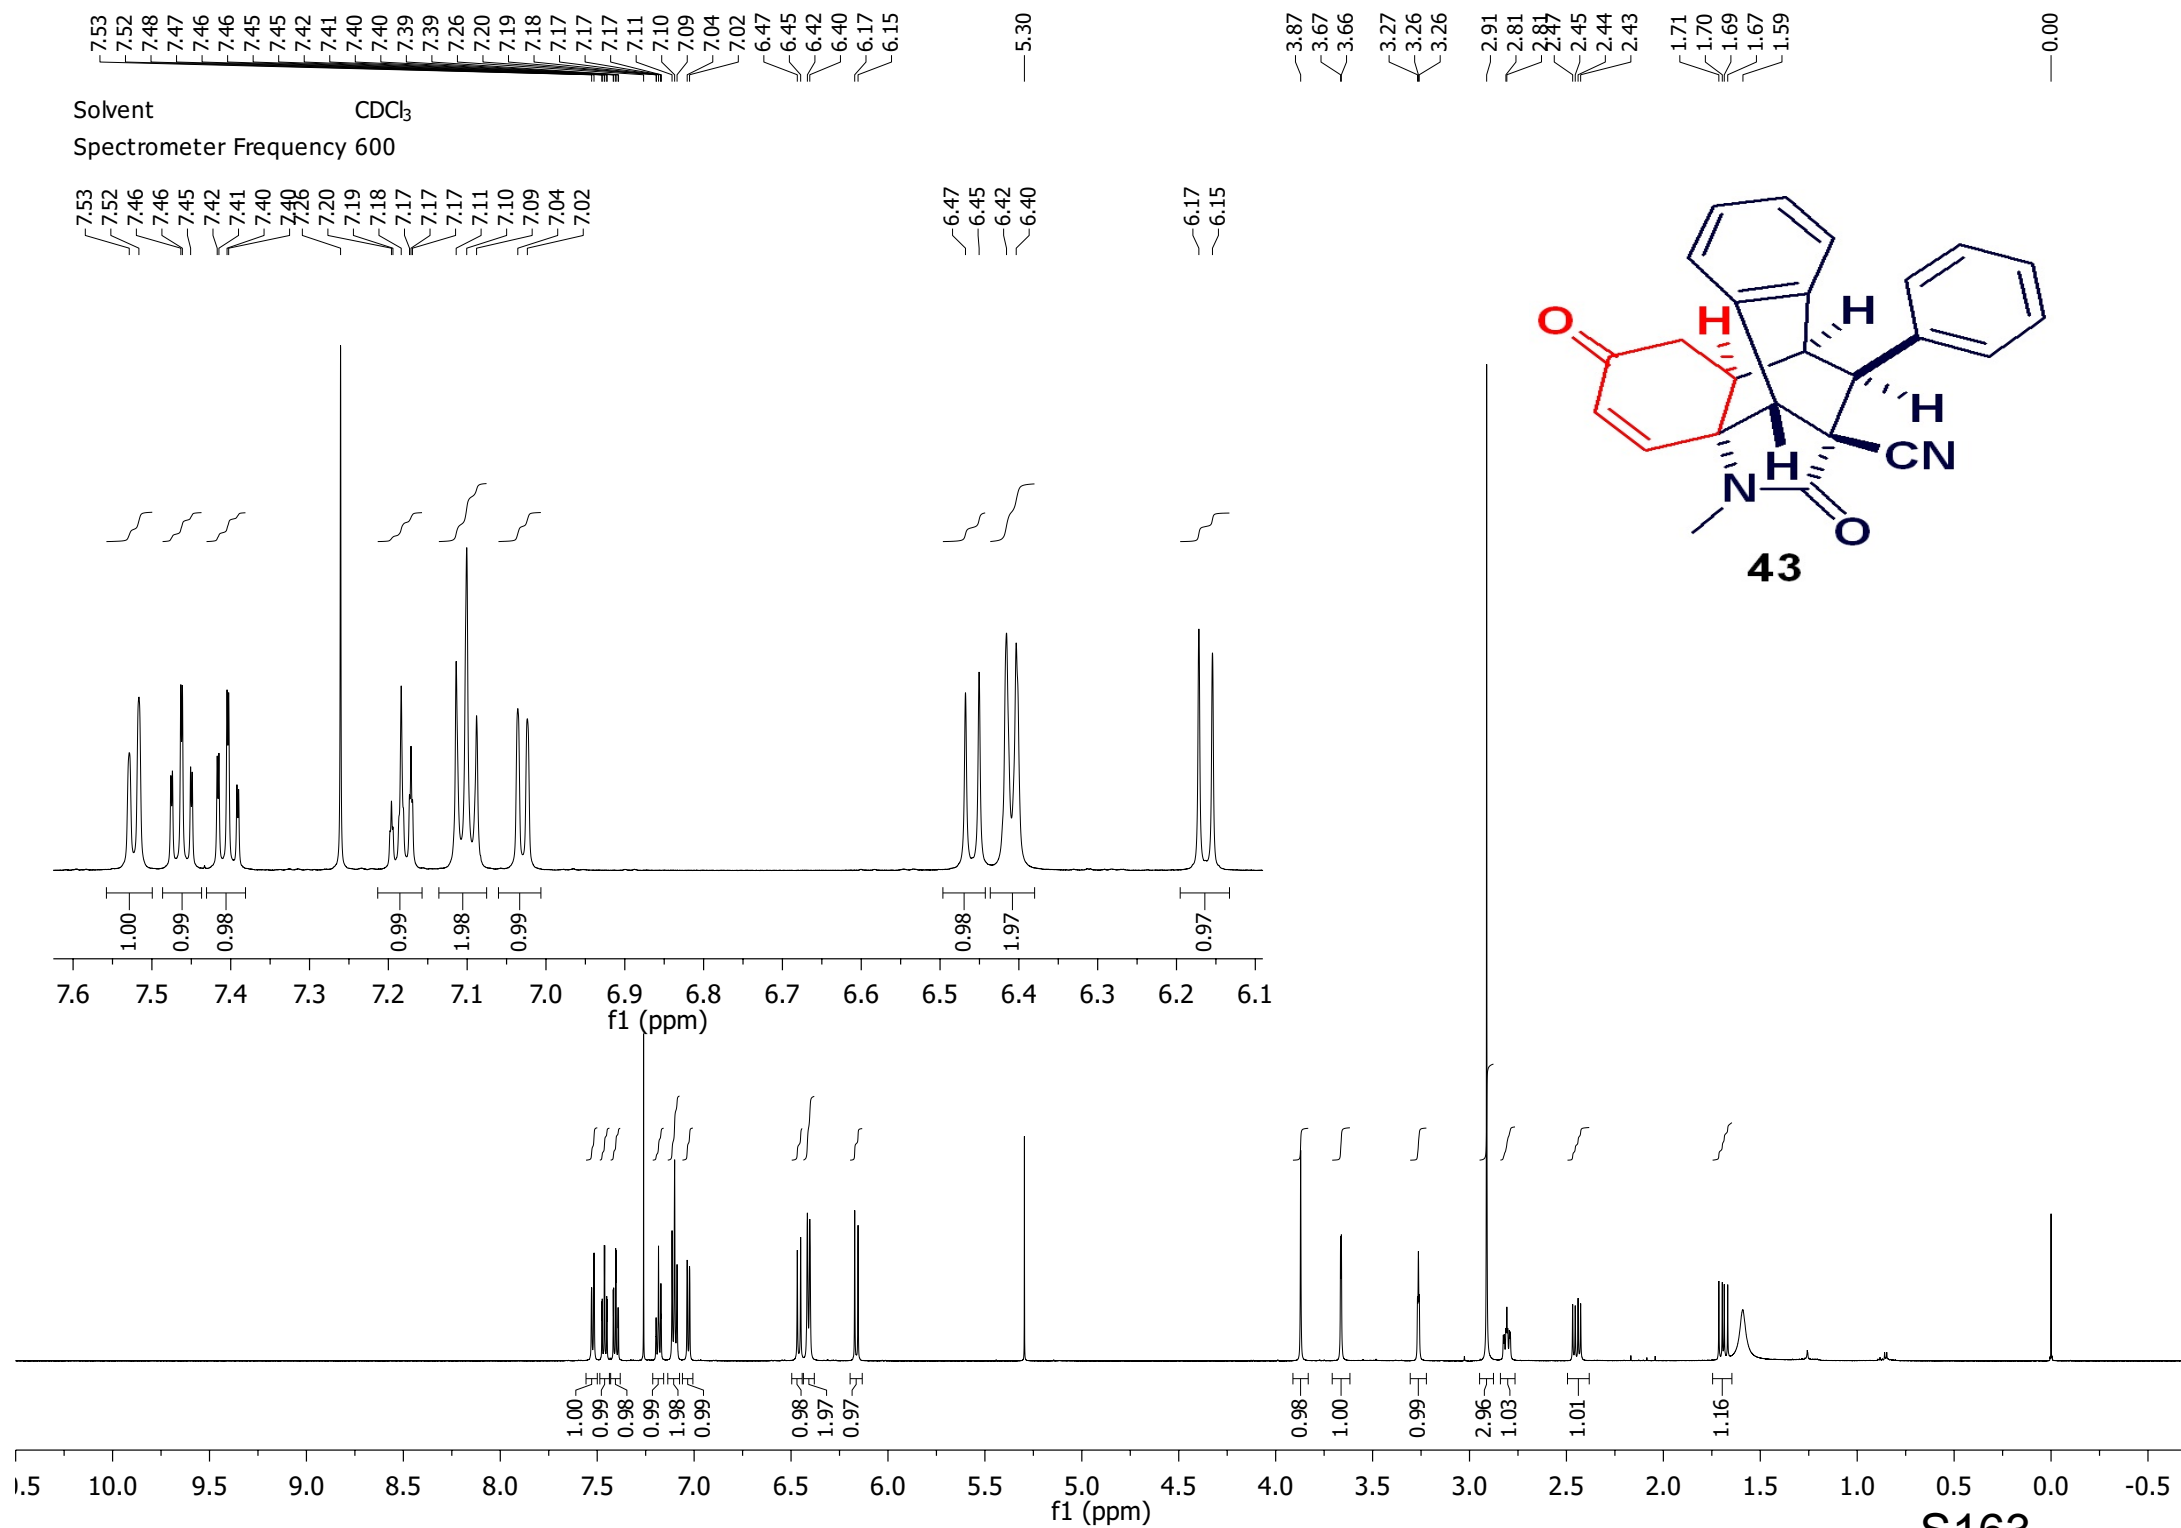

Solvent  $\text{CDCl}_3$   
Spectrometer Frequency 150

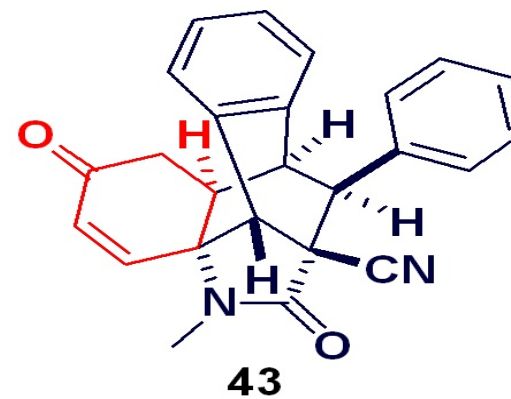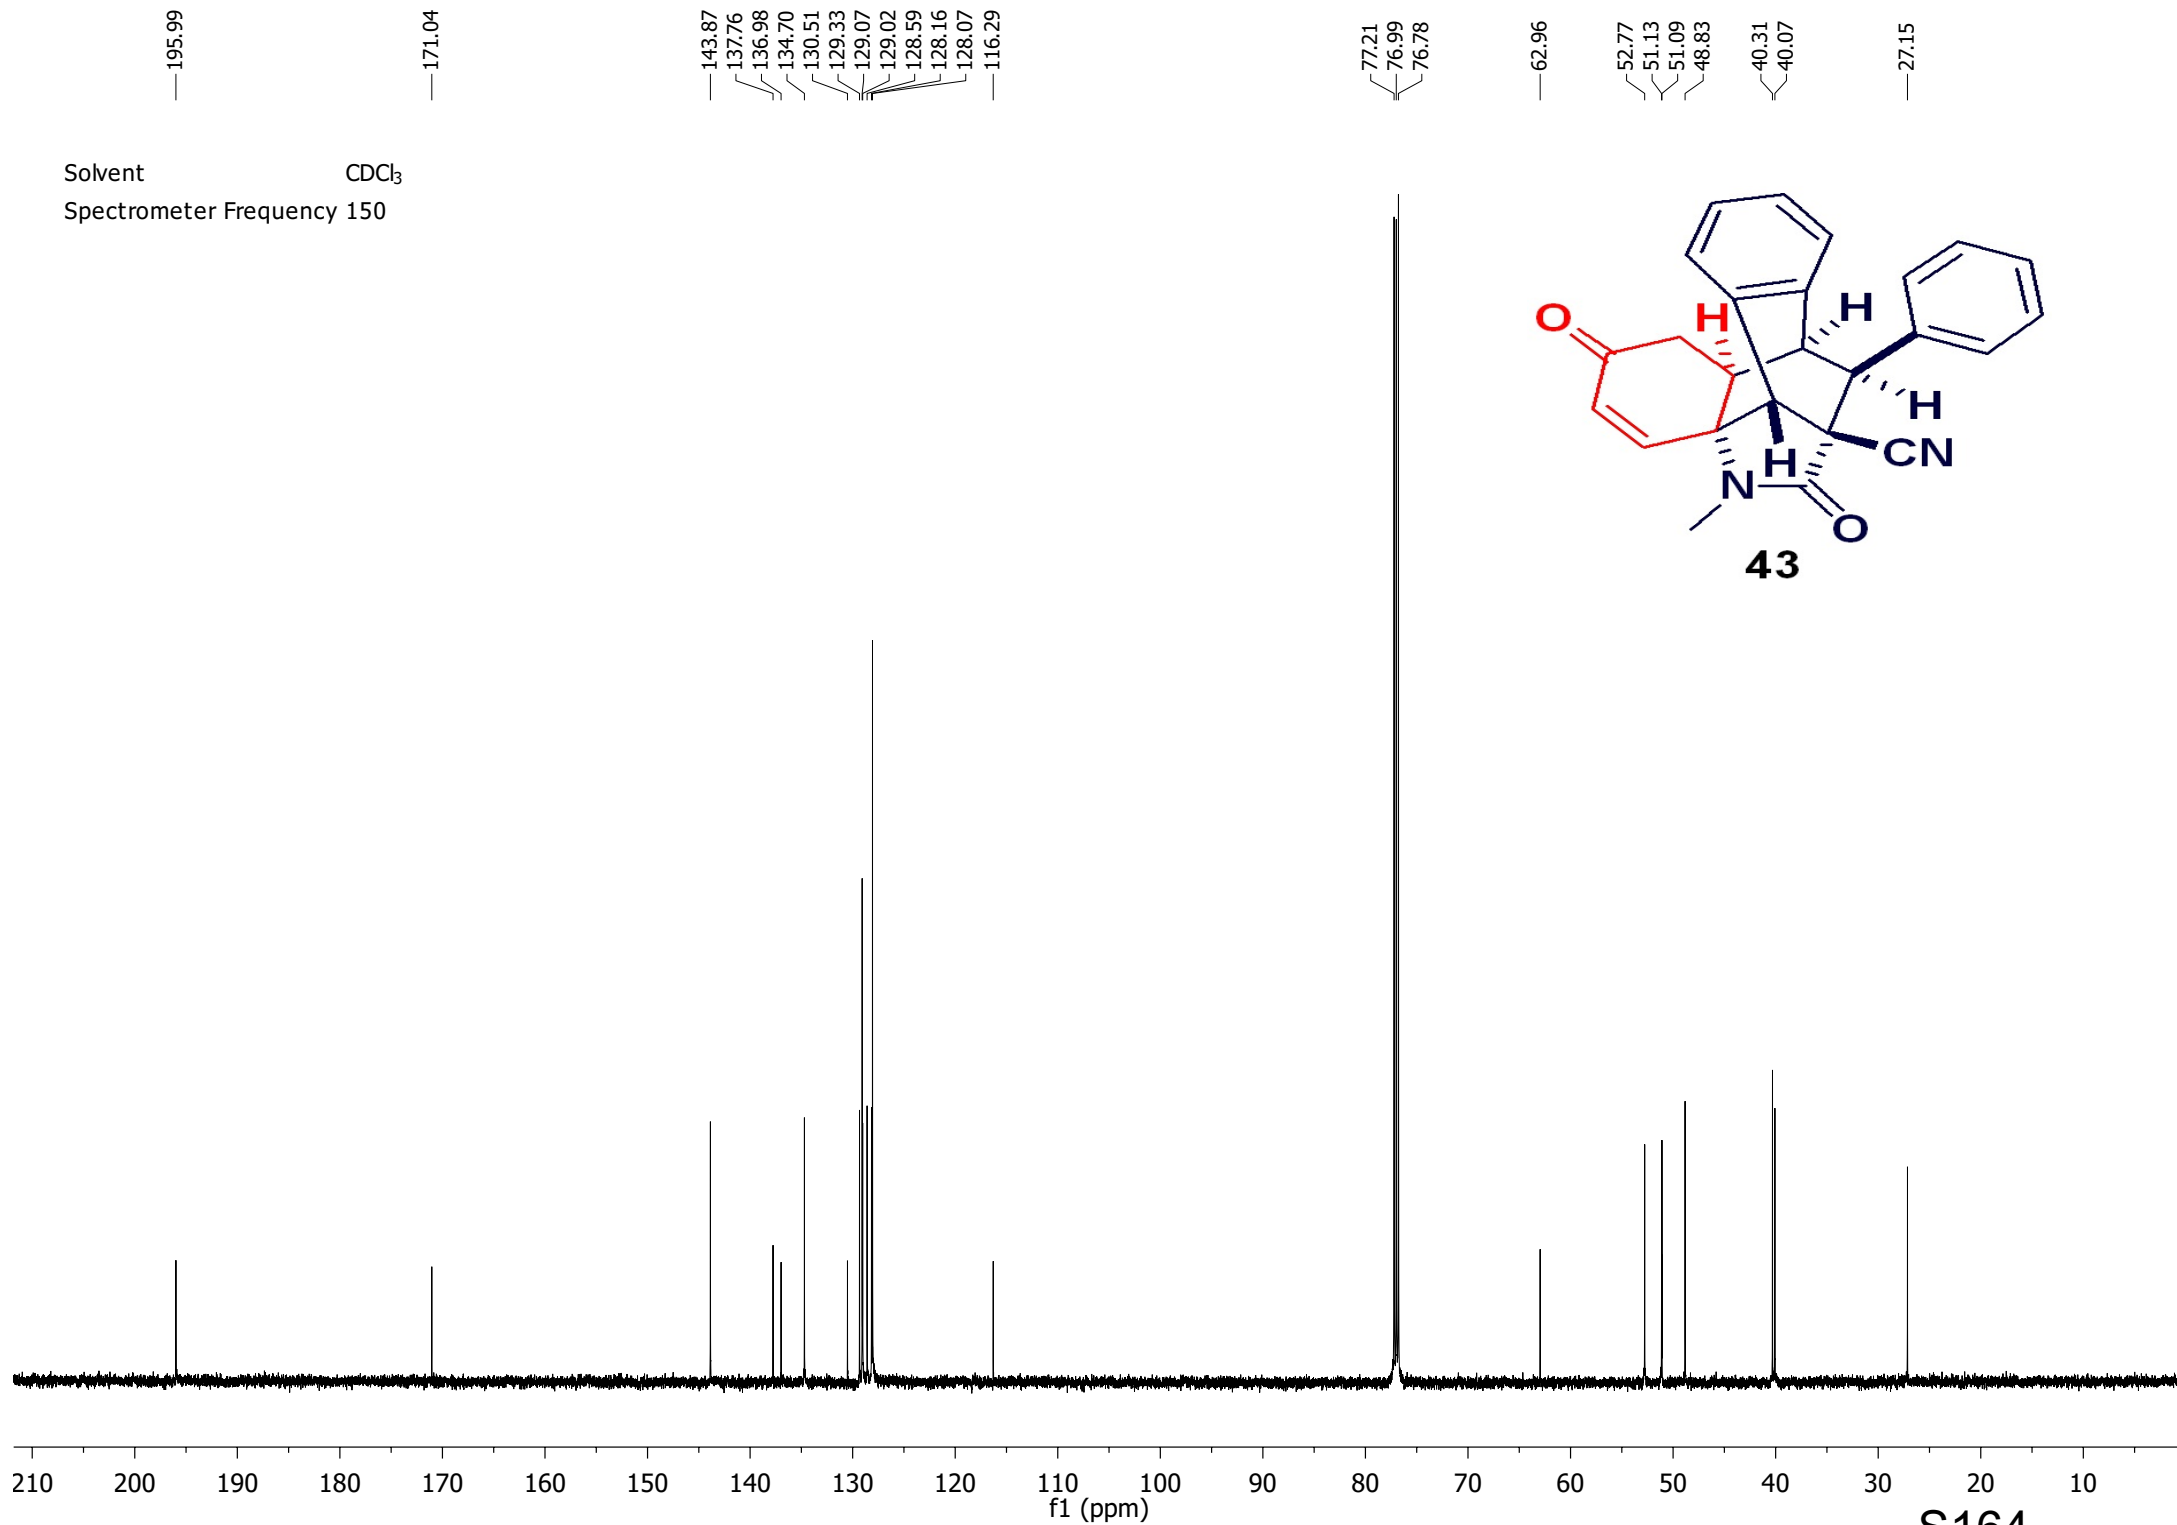

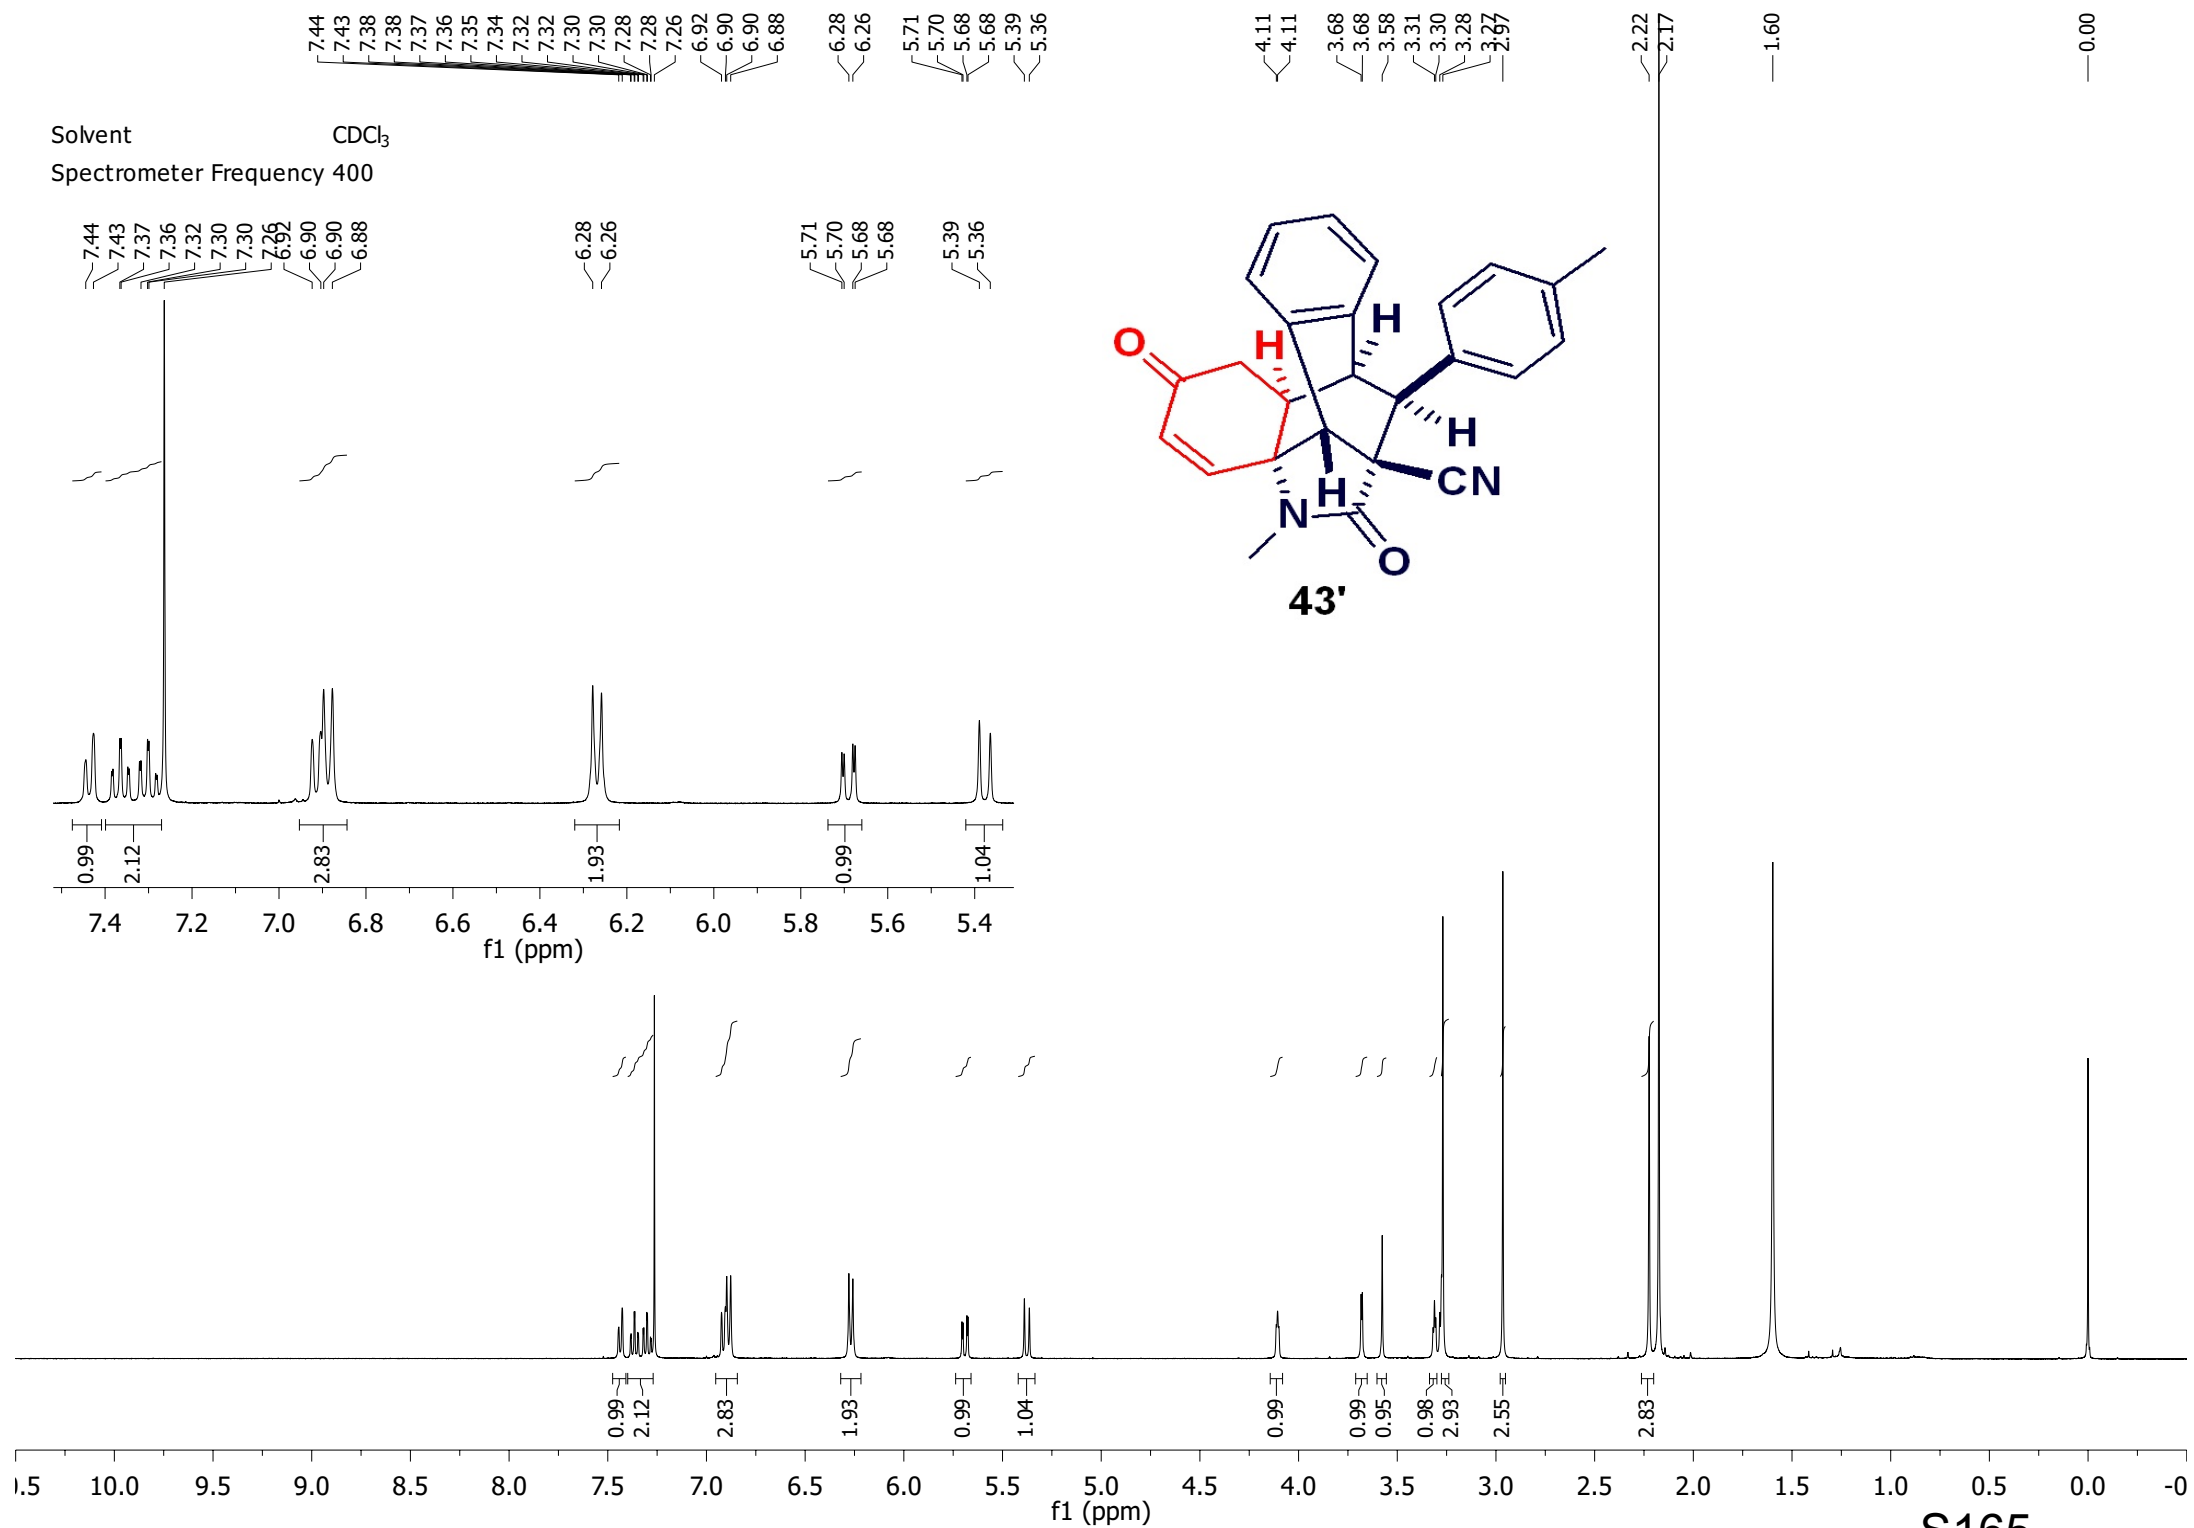

Solvent  $\text{CDCl}_3$   
Spectrometer Frequency 100

— 171.43  
— 150.51  
— 138.14  
— 137.44  
— 135.50  
— 131.63  
— 129.05  
— 128.90  
— 128.63  
— 128.39  
— 127.90  
— 127.73  
— 127.45  
— 124.95  
— 116.87

— 94.79

77.31  
77.00  
76.68

— 65.08

54.23  
53.54

51.31  
51.13

48.81  
43.36

— 30.93

— 27.50

— 21.00

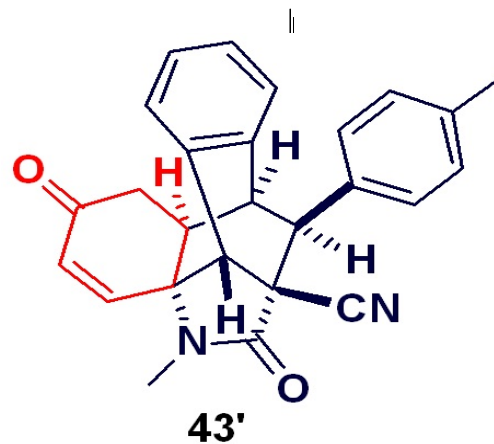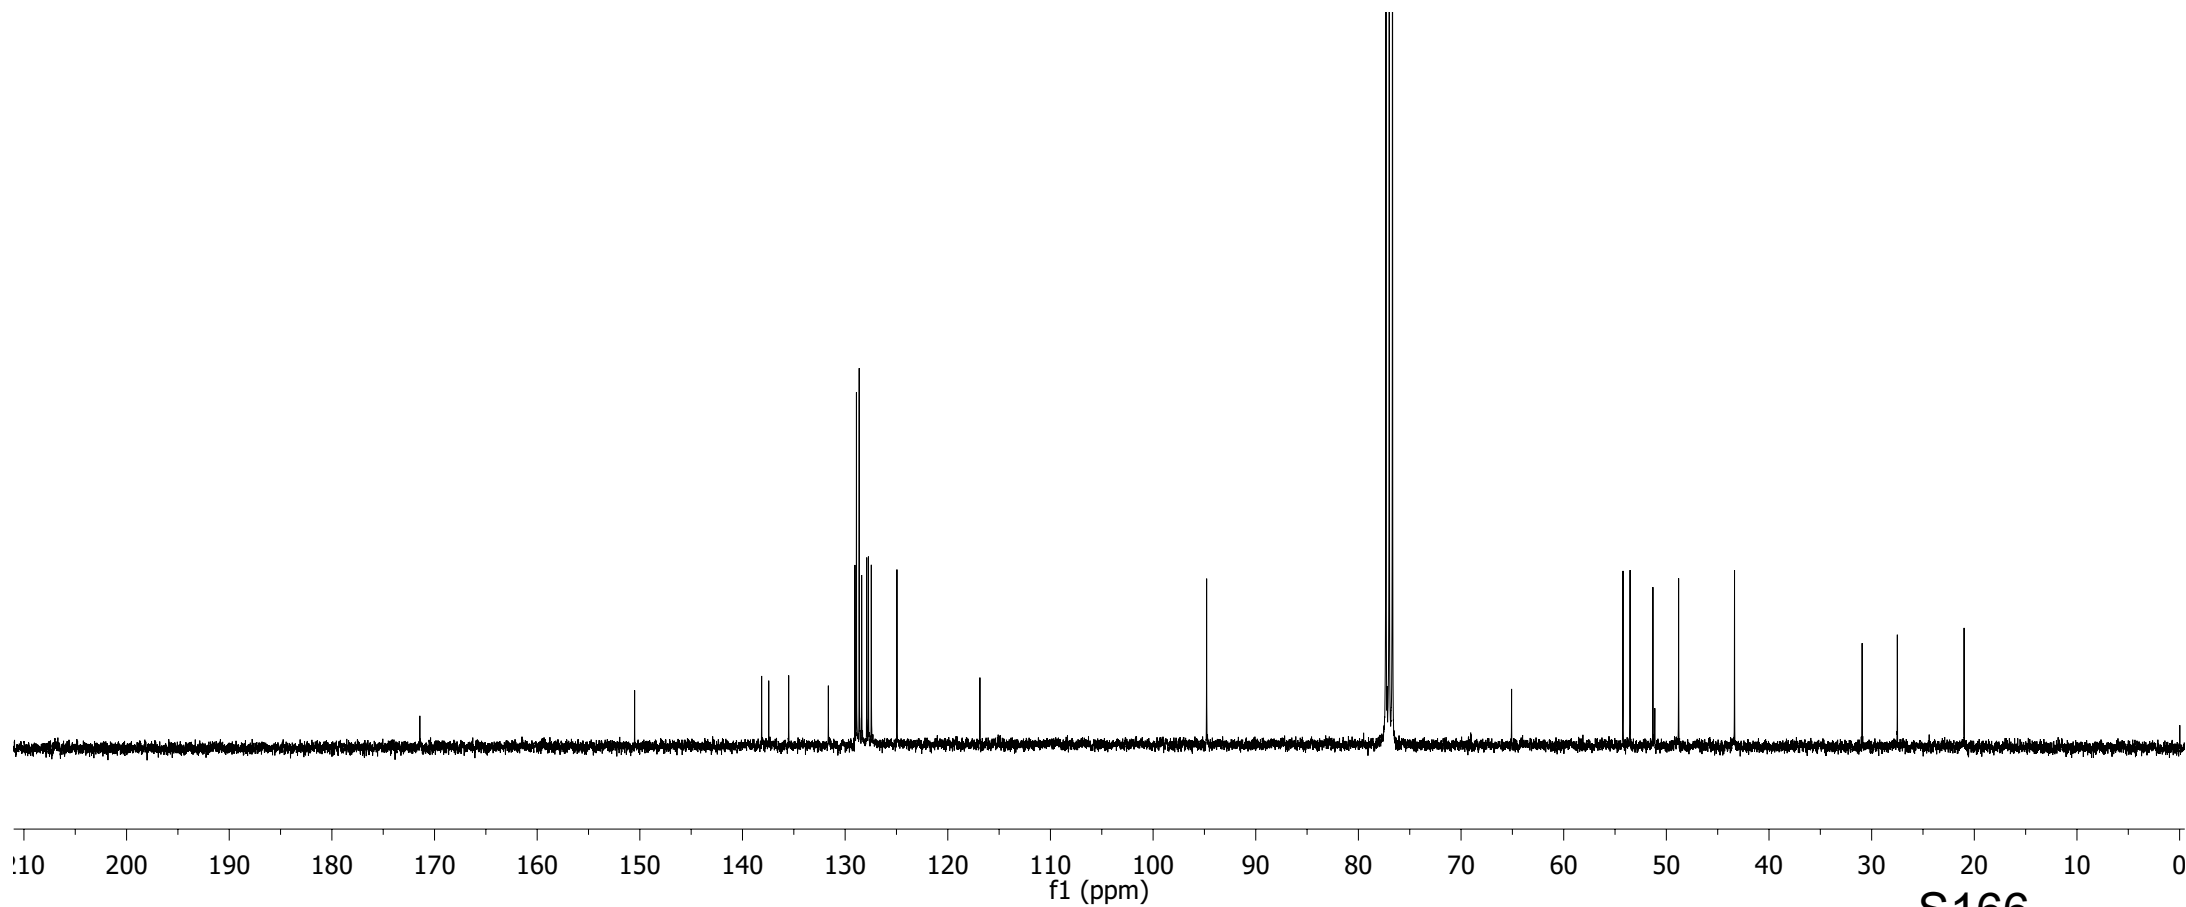

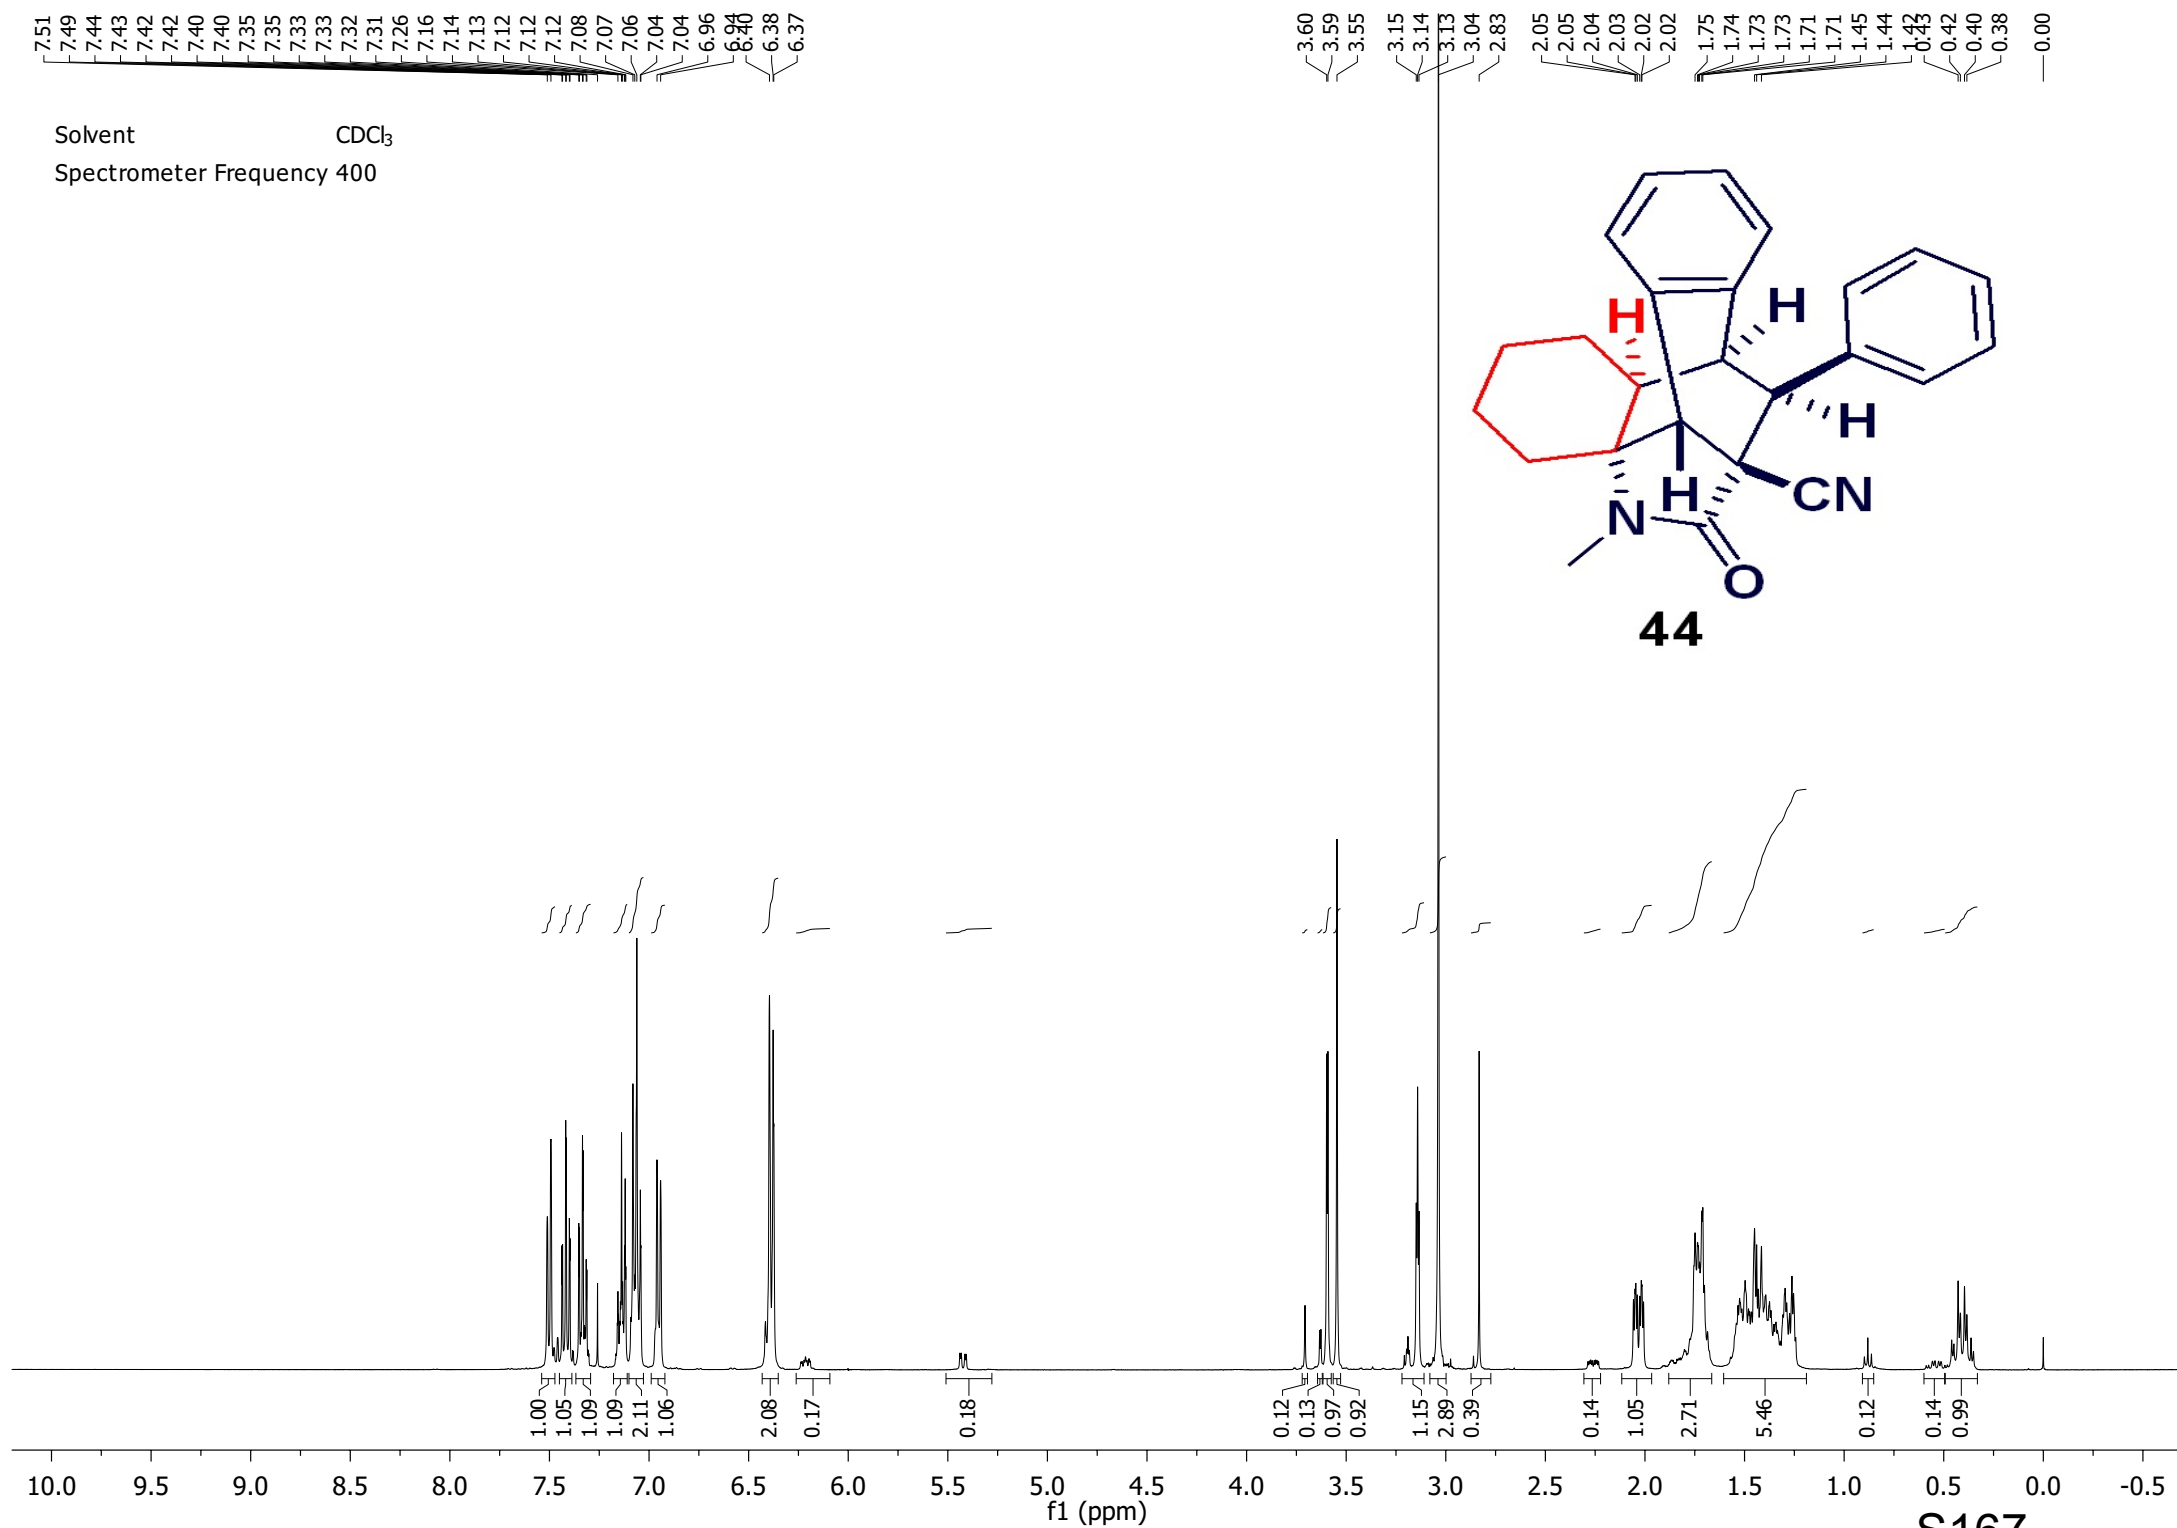

Solvent  $\text{CDCl}_3$   
Spectrometer Frequency 100

— 171.19

138.63  
138.19  
138.10  
129.03  
128.04  
127.92  
127.74  
127.56  
127.21

77.31  
76.99  
76.67

63.14  
54.23  
53.89  
51.85  
51.80  
51.31  
48.79  
48.67  
43.60  
42.25

27.10  
26.77  
26.12  
24.91  
22.90  
19.45  
17.39

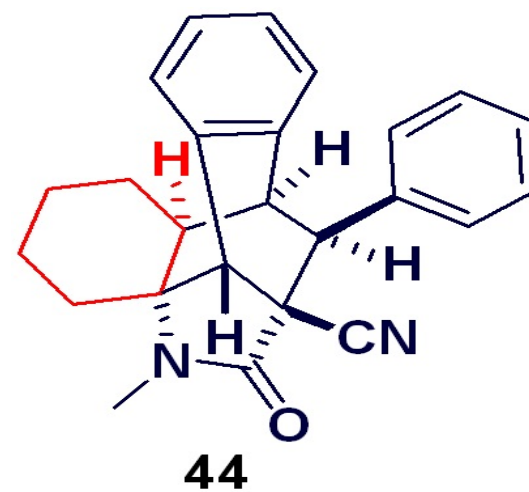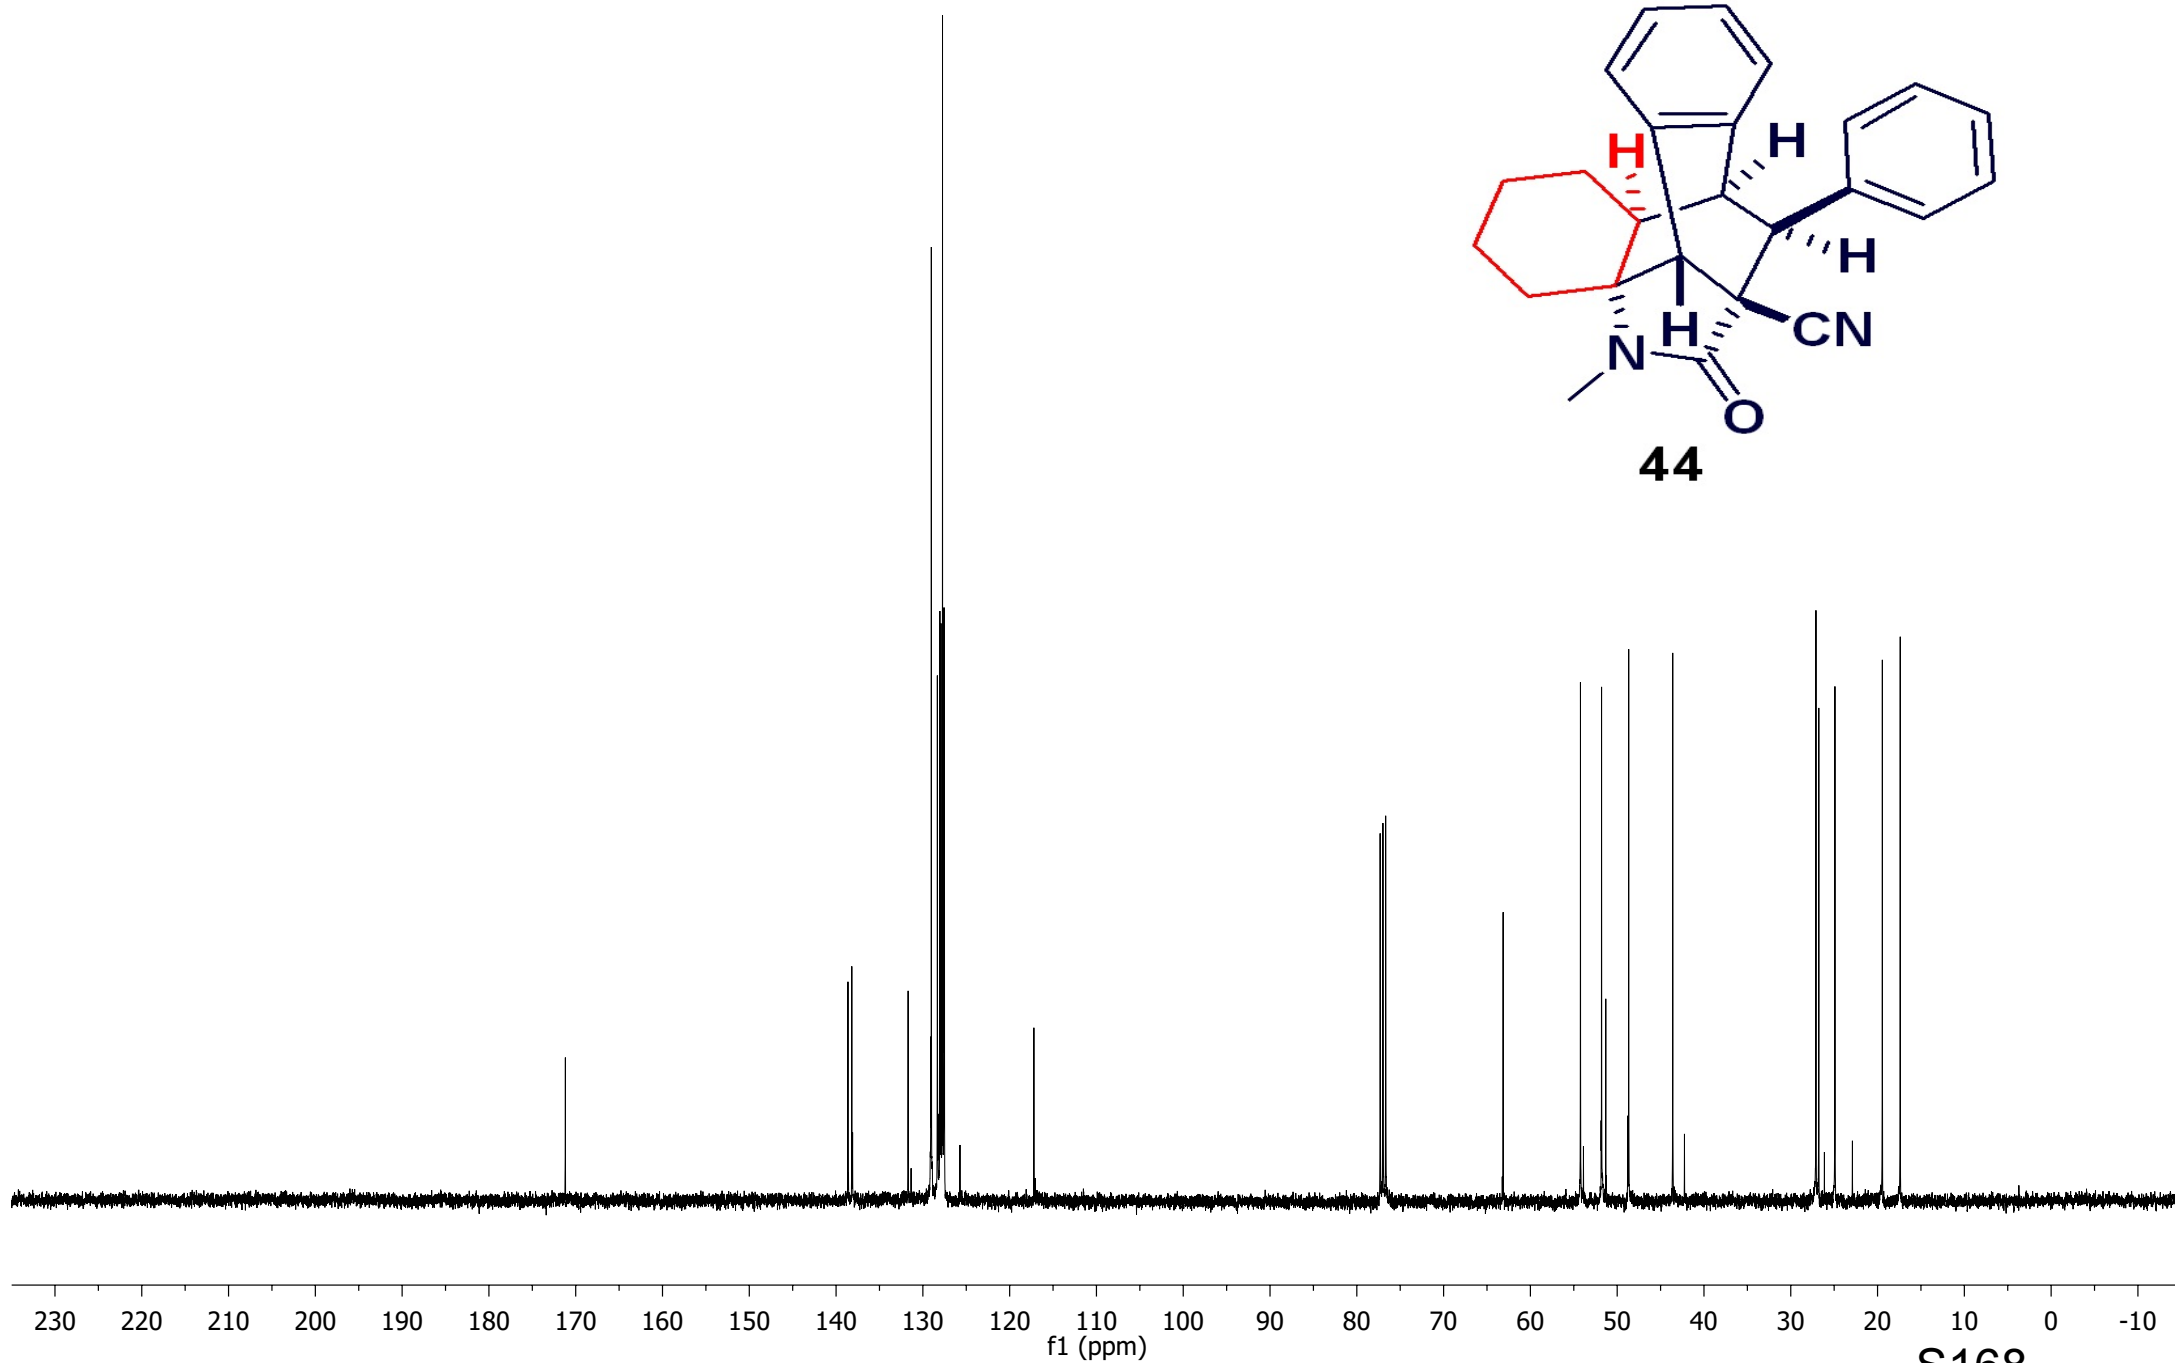

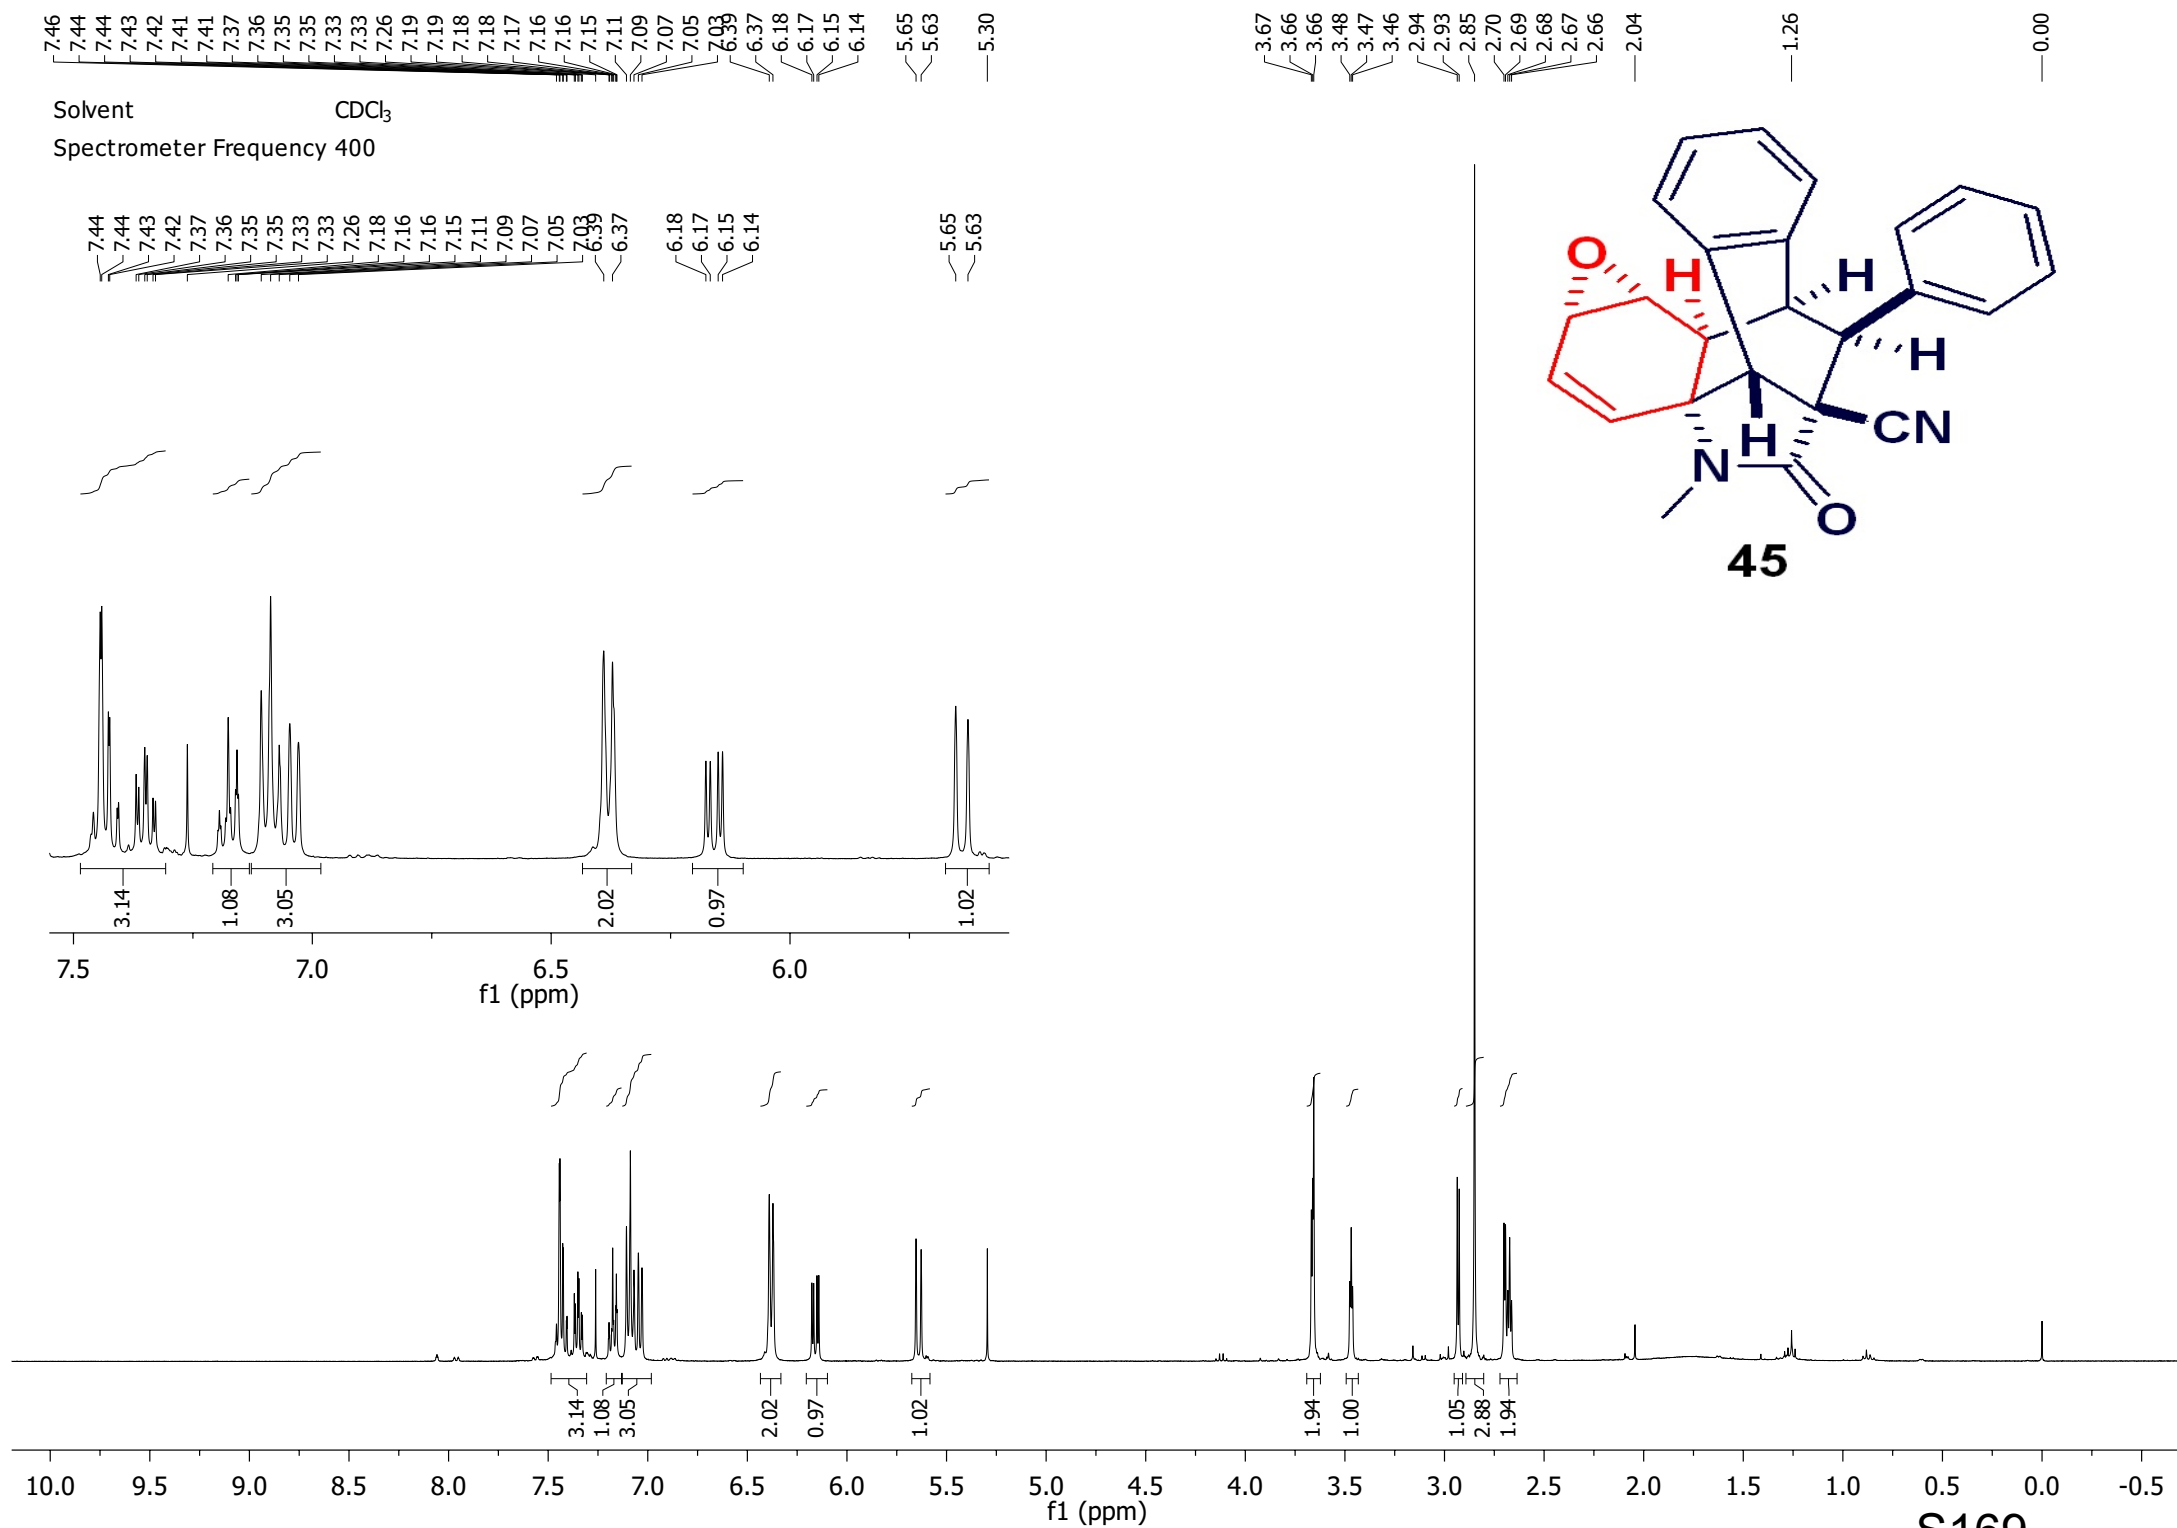

Solvent

$\text{CDCl}_3$

Spectrometer Frequency 100

171.19

137.75

136.26

128.95

128.90

127.99

127.96

127.95

127.25

116.73

77.31

76.99

76.67

63.90

56.10

53.56

51.06

50.41

47.14

45.26

42.15

27.10

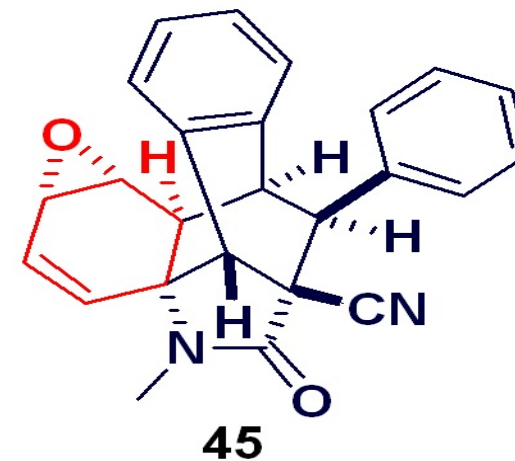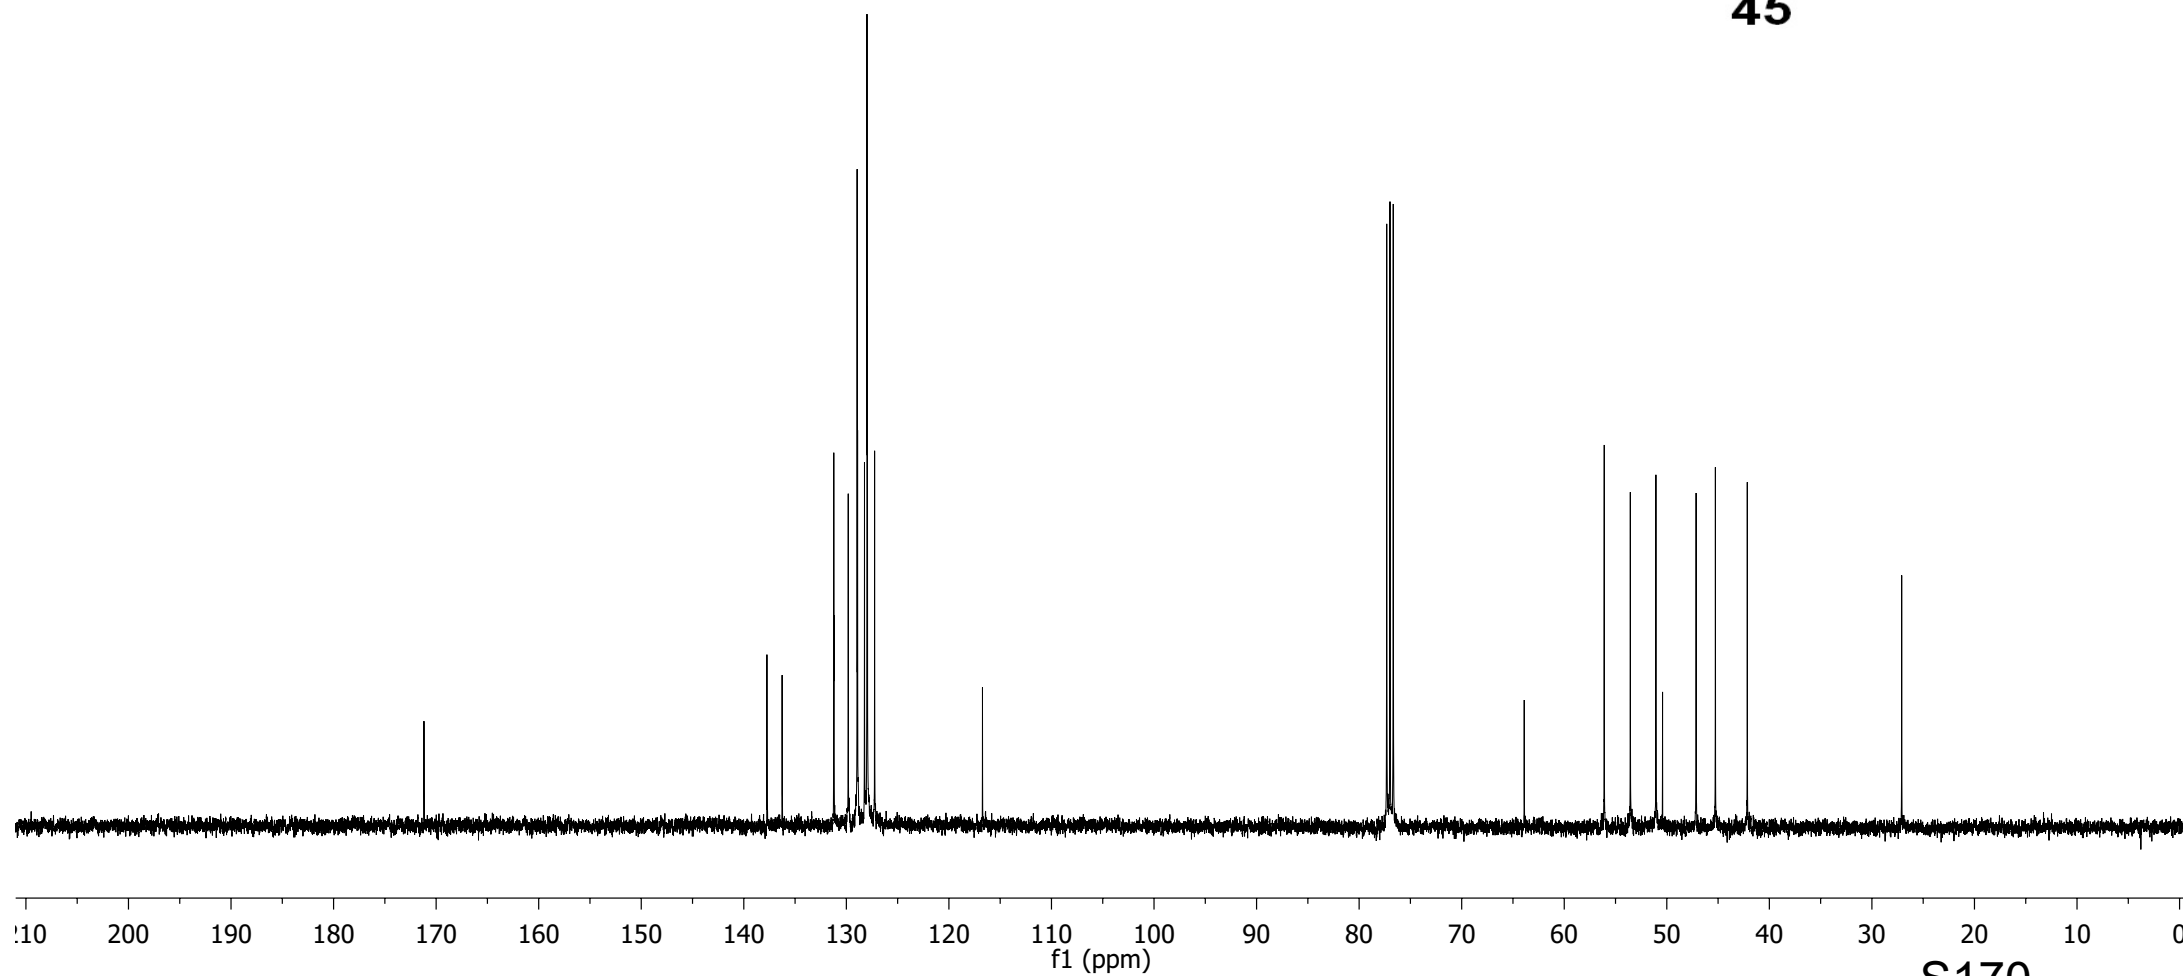

S170



---

The following ALERTS were generated. Each ALERT has the format

**test-name\_ALERT\_alert-type\_alert-level.**

Click on the hyperlinks for more details of the test.

---

### Alert level G

|                   |                                                  |     |             |
|-------------------|--------------------------------------------------|-----|-------------|
| PLAT003_ALERT_2_G | Number of Uiso or Uij Restrained non-H Atoms ... | 28  | Report      |
| PLAT005_ALERT_5_G | No Embedded Refinement Details Found in the CIF  |     | Please Do ! |
| PLAT230_ALERT_2_G | Hirshfeld Test Diff for C2 --C24 .               | 7.6 | s.u.        |
| PLAT793_ALERT_4_G | Model has Chirality at C2 (Centro SPGR)          | S   | Verify      |
| PLAT793_ALERT_4_G | Model has Chirality at C3 (Centro SPGR)          | R   | Verify      |
| PLAT793_ALERT_4_G | Model has Chirality at C4 (Centro SPGR)          | R   | Verify      |
| PLAT793_ALERT_4_G | Model has Chirality at C9 (Centro SPGR)          | S   | Verify      |
| PLAT793_ALERT_4_G | Model has Chirality at C10 (Centro SPGR)         | S   | Verify      |
| PLAT793_ALERT_4_G | Model has Chirality at C17 (Centro SPGR)         | S   | Verify      |
| PLAT860_ALERT_3_G | Number of Least-Squares Restraints .....         | 960 | Note        |

---

0 **ALERT level A** = Most likely a serious problem - resolve or explain  
0 **ALERT level B** = A potentially serious problem, consider carefully  
0 **ALERT level C** = Check. Ensure it is not caused by an omission or oversight  
10 **ALERT level G** = General information/check it is not something unexpected

0 ALERT type 1 CIF construction/syntax error, inconsistent or missing data  
2 ALERT type 2 Indicator that the structure model may be wrong or deficient  
1 ALERT type 3 Indicator that the structure quality may be low  
6 ALERT type 4 Improvement, methodology, query or suggestion  
1 ALERT type 5 Informative message, check

---

## checkCIF publication errors

### Alert level A

PUBL004\_ALERT\_1\_A The contact author's name and address are missing,  
\_publ\_contact\_author\_name and \_publ\_contact\_author\_address.  
PUBL005\_ALERT\_1\_A \_publ\_contact\_author\_email, \_publ\_contact\_author\_fax and  
\_publ\_contact\_author\_phone are all missing.  
At least one of these should be present.  
PUBL006\_ALERT\_1\_A \_publ\_requested\_journal is missing  
e.g. 'Acta Crystallographica Section C'  
PUBL008\_ALERT\_1\_A \_publ\_section\_title is missing. Title of paper.  
PUBL009\_ALERT\_1\_A \_publ\_author\_name is missing. List of author(s) name(s).  
PUBL010\_ALERT\_1\_A \_publ\_author\_address is missing. Author(s) address(es).  
PUBL012\_ALERT\_1\_A \_publ\_section\_abstract is missing.  
Abstract of paper in English.

---

7 **ALERT level A** = Data missing that is essential or data in wrong format  
0 **ALERT level G** = General alerts. Data that may be required is missing

---

## Publication of your CIF

You should attempt to resolve as many as possible of the alerts in all categories. Often the minor alerts point to easily fixed oversights, errors and omissions in your CIF or refinement strategy, so attention to these fine details can be worthwhile. In order to resolve some of the more serious problems it may be necessary to carry out additional measurements or structure refinements. However, the nature of your study may justify the reported deviations from journal submission requirements and the more serious of these should be commented upon in the discussion or experimental section of a paper or in the "special\_details" fields of the CIF. *checkCIF* was carefully designed to identify outliers and unusual parameters, but every test has its limitations and alerts that are not important in a particular case may appear. Conversely, the absence of alerts does not guarantee there are no aspects of the results needing attention. It is up to the individual to critically assess their own results and, if necessary, seek expert advice.

If level A alerts remain, which you believe to be justified deviations, and you intend to submit this CIF for publication in a journal, you should additionally insert an explanation in your CIF using the Validation Reply Form (VRF) below. This will allow your explanation to be considered as part of the review process.

## Validation response form

Please find below a validation response form (VRF) that can be filled in and pasted into your CIF.

```
# start Validation Reply Form
_vrf_PUBL004_GLOBAL
;
PROBLEM: The contact author's name and address are missing,
RESPONSE: ...
;
_vrf_PUBL005_GLOBAL
;
PROBLEM: _publ_contact_author_email, _publ_contact_author_fax and
RESPONSE: ...
;
_vrf_PUBL006_GLOBAL
;
PROBLEM: _publ_requested_journal is missing
RESPONSE: ...
;
_vrf_PUBL008_GLOBAL
;
PROBLEM: _publ_section_title is missing. Title of paper.
RESPONSE: ...
;
_vrf_PUBL009_GLOBAL
;
PROBLEM: _publ_author_name is missing. List of author(s) name(s).
RESPONSE: ...
;
_vrf_PUBL010_GLOBAL
;
PROBLEM: _publ_author_address is missing. Author(s) address(es).
```

```

RESPONSE: ...
;
_vrf_PUBL012_GLOBAL
;
PROBLEM: _publ_section_abstract is missing.
RESPONSE: ...
;
# end Validation Reply Form

```

If you wish to submit your CIF for publication in Acta Crystallographica Section C or E, you should upload your CIF via the web. If you wish to submit your CIF for publication in IUCrData you should upload your CIF via the web. If your CIF is to form part of a submission to another IUCr journal, you will be asked, either during electronic submission or by the Co-editor handling your paper, to upload your CIF via our web site.

---

**PLATON version of 13/07/2021; check.def file version of 13/07/2021**

Datablock I - ellipsoid plot

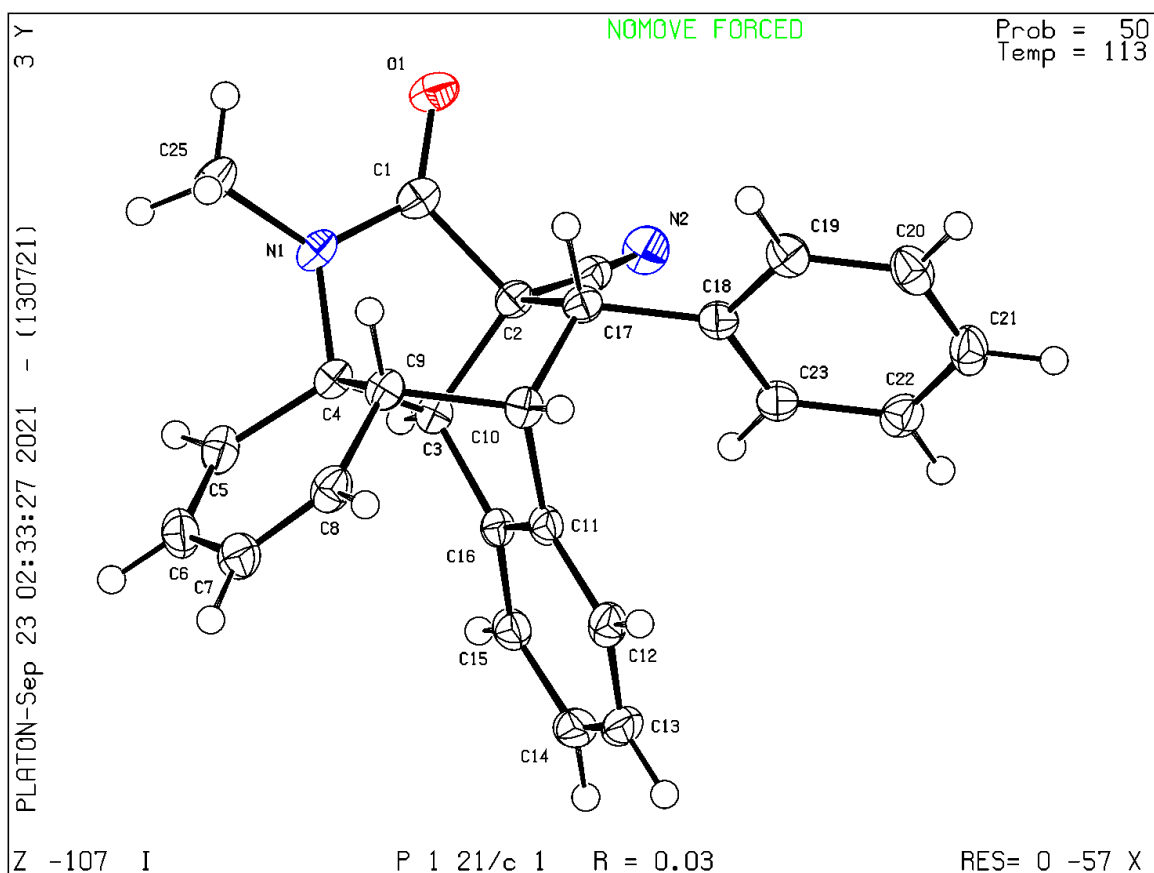



---

The following ALERTS were generated. Each ALERT has the format

**test-name\_ALERT\_alert-type\_alert-level.**

Click on the hyperlinks for more details of the test.

---

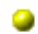

#### Alert level C

|                                                                   |             |
|-------------------------------------------------------------------|-------------|
| PLAT906_ALERT_3_C Large K Value in the Analysis of Variance ..... | 2.195 Check |
| PLAT911_ALERT_3_C Missing FCF Refl Between Thmin & STh/L= 0.595   | 58 Report   |

---

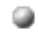

#### Alert level G

|                                                                    |             |
|--------------------------------------------------------------------|-------------|
| PLAT003_ALERT_2_G Number of Uiso or Uij Restrained non-H Atoms ... | 29 Report   |
| PLAT178_ALERT_4_G The CIF-Embedded .res File Contains SIMU Records | 1 Report    |
| PLAT793_ALERT_4_G Model has Chirality at C2 (Centro SPGR)          | R Verify    |
| PLAT793_ALERT_4_G Model has Chirality at C3 (Centro SPGR)          | S Verify    |
| PLAT793_ALERT_4_G Model has Chirality at C4 (Centro SPGR)          | S Verify    |
| PLAT793_ALERT_4_G Model has Chirality at C5 (Centro SPGR)          | R Verify    |
| PLAT793_ALERT_4_G Model has Chirality at C13 (Centro SPGR)         | R Verify    |
| PLAT793_ALERT_4_G Model has Chirality at C20 (Centro SPGR)         | R Verify    |
| PLAT860_ALERT_3_G Number of Least-Squares Restraints .....         | 984 Note    |
| PLAT909_ALERT_3_G Percentage of I>2sig(I) Data at Theta(Max) Still | 62% Note    |
| PLAT933_ALERT_2_G Number of HKL-OMIT Records in Embedded .res File | 1 Note      |
| PLAT967_ALERT_5_G Note: Two-Theta Cutoff Value in Embedded .res .. | 50.0 Degree |
| PLAT978_ALERT_2_G Number C-C Bonds with Positive Residual Density. | 6 Info      |

---

- 0 **ALERT level A** = Most likely a serious problem - resolve or explain  
0 **ALERT level B** = A potentially serious problem, consider carefully  
2 **ALERT level C** = Check. Ensure it is not caused by an omission or oversight  
13 **ALERT level G** = General information/check it is not something unexpected

- 0 ALERT type 1 CIF construction/syntax error, inconsistent or missing data  
3 ALERT type 2 Indicator that the structure model may be wrong or deficient  
4 ALERT type 3 Indicator that the structure quality may be low  
7 ALERT type 4 Improvement, methodology, query or suggestion  
1 ALERT type 5 Informative message, check
- 
-

It is advisable to attempt to resolve as many as possible of the alerts in all categories. Often the minor alerts point to easily fixed oversights, errors and omissions in your CIF or refinement strategy, so attention to these fine details can be worthwhile. In order to resolve some of the more serious problems it may be necessary to carry out additional measurements or structure refinements. However, the purpose of your study may justify the reported deviations and the more serious of these should normally be commented upon in the discussion or experimental section of a paper or in the "special\_details" fields of the CIF. checkCIF was carefully designed to identify outliers and unusual parameters, but every test has its limitations and alerts that are not important in a particular case may appear. Conversely, the absence of alerts does not guarantee there are no aspects of the results needing attention. It is up to the individual to critically assess their own results and, if necessary, seek expert advice.

### **Publication of your CIF in IUCr journals**

A basic structural check has been run on your CIF. These basic checks will be run on all CIFs submitted for publication in IUCr journals (*Acta Crystallographica*, *Journal of Applied Crystallography*, *Journal of Synchrotron Radiation*); however, if you intend to submit to *Acta Crystallographica Section C* or *E* or *IUCrData*, you should make sure that full publication checks are run on the final version of your CIF prior to submission.

### **Publication of your CIF in other journals**

Please refer to the *Notes for Authors* of the relevant journal for any special instructions relating to CIF submission.

---

**PLATON version of 18/05/2022; check.def file version of 17/05/2022**

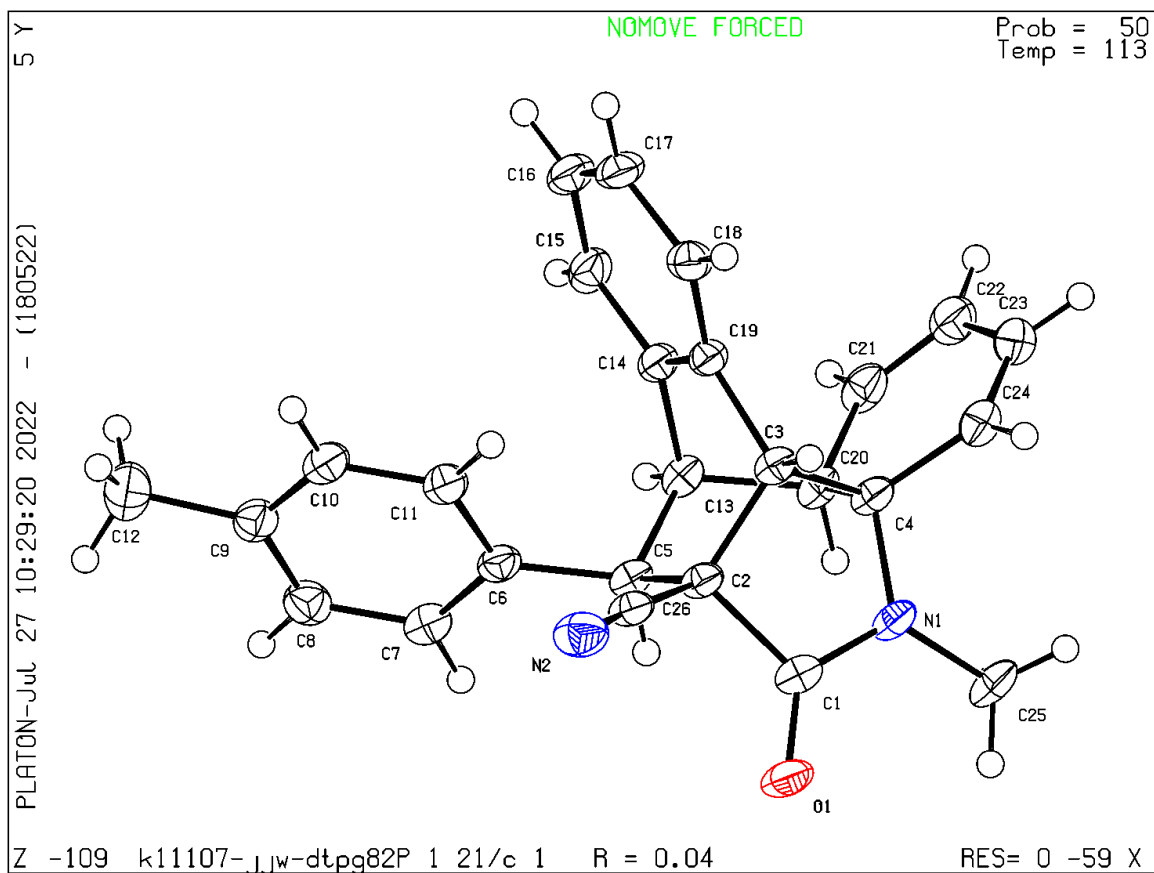

## checkCIF/PLATON report

Structure factors have been supplied for datablock(s) shelx

THIS REPORT IS FOR GUIDANCE ONLY. IF USED AS PART OF A REVIEW PROCEDURE FOR PUBLICATION, IT SHOULD NOT REPLACE THE EXPERTISE OF AN EXPERIENCED CRYSTALLOGRAPHIC REFEREE.

No syntax errors found. CIF dictionary Interpreting this report

**Datablock: shelx**

|                 |                |                    |               |
|-----------------|----------------|--------------------|---------------|
| Bond precision: | C-C = 0.0030 A | Wavelength=0.71073 |               |
| Cell:           | a=10.5513(6)   | b=10.5230(6)       | c=22.0654(12) |
|                 | alpha=90       | beta=99.639(2)     | gamma=90      |
| Temperature:    | 200 K          |                    |               |

|                        | Calculated               | Reported     |
|------------------------|--------------------------|--------------|
| Volume                 | 2415.4 (2)               | 2415.4 (2)   |
| Space group            | P 21/n                   | P 21/n       |
| Hall group             | -P 2yn                   | -P 2yn       |
| Moiety formula         | C27 H24 N2 O [+ solvent] | C27 H24 N2 O |
| Sum formula            | C27 H24 N2 O [+ solvent] | C27 H24 N2 O |
| Mr                     | 392.48                   | 392.48       |
| Dx, g cm <sup>-3</sup> | 1.079                    | 1.079        |
| Z                      | 4                        | 4            |
| Mu (mm <sup>-1</sup> ) | 0.066                    | 0.066        |
| F000                   | 832.0                    | 832.0        |
| F000'                  | 832.31                   |              |
| h, k, l <sub>max</sub> | 12, 12, 26               | 12, 12, 26   |
| Nref                   | 4292                     | 4280         |
| Tmin, Tmax             | 0.984, 0.998             | 0.983, 0.998 |
| Tmin'                  | 0.983                    |              |

Correction method= # Reported T Limits: Tmin=0.983 Tmax=0.998  
AbsCorr = MULTI-SCAN

Data completeness= 0.997                      Theta (max)= 25.070

|                               |                                 |
|-------------------------------|---------------------------------|
| R(reflections)= 0.0557( 3779) | wR2(reflections)= 0.1635( 4280) |
| S = 1.091                     | Npar= 273                       |

---

The following ALERTS were generated. Each ALERT has the format

**test-name\_ALERT\_alert-type\_alert-level.**

Click on the hyperlinks for more details of the test.

---

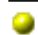

### Alert level C

ABSTY02\_ALERT\_1\_C An \_exptl\_absorpt\_correction\_type has been given without  
a literature citation. This should be contained in the  
\_exptl\_absorpt\_process\_details field.  
Absorption correction given as multi-scan

SHFSU01\_ALERT\_2\_C The absolute value of parameter shift to su ratio > 0.05  
Absolute value of the parameter shift to su ratio given 0.071  
Additional refinement cycles may be required.

PLAT080\_ALERT\_2\_C Maximum Shift/Error ..... 0.07 Why ?

PLAT906\_ALERT\_3\_C Large K Value in the Analysis of Variance ..... 2.518 Check

PLAT911\_ALERT\_3\_C Missing FCF Refl Between Thmin & STh/L= 0.596 10 Report

1 2 0, -1 1 1, -2 1 2, -1 1 2, -1 0 3, 0 1 3,  
0 1 4, 0 2 5, -3 3 8, 7 1 19,

PLAT913\_ALERT\_3\_C Missing # of Very Strong Reflections in FCF .... 4 Note

-1 1 1, 0 0 2, -2 1 2, 0 1 4,

PLAT918\_ALERT\_3\_C Reflection(s) with I(obs) much Smaller I(calc) . 2 Check

---

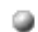

### Alert level G

PLAT066\_ALERT\_1\_G Predicted and Reported Tmin&Tmax Range Identical ? Check

PLAT230\_ALERT\_2\_G Hirshfeld Test Diff for C19 --C20 . 5.3 s.u.

PLAT605\_ALERT\_4\_G Largest Solvent Accessible VOID in the Structure 205 A\*\*3

PLAT793\_ALERT\_4\_G Model has Chirality at C3 (Centro SpGr) R Verify

PLAT793\_ALERT\_4\_G Model has Chirality at C10 (Centro SpGr) S Verify

PLAT793\_ALERT\_4\_G Model has Chirality at C11 (Centro SpGr) S Verify

PLAT793\_ALERT\_4\_G Model has Chirality at C18 (Centro SpGr) R Verify

PLAT793\_ALERT\_4\_G Model has Chirality at C19 (Centro SpGr) S Verify

PLAT793\_ALERT\_4\_G Model has Chirality at C21 (Centro SpGr) S Verify

PLAT869\_ALERT\_4\_G ALERTS Related to the Use of SQUEEZE Suppressed ! Info

PLAT883\_ALERT\_1\_G Absent Datum for \_atom\_sites\_solution\_primary .. Please Do !

PLAT909\_ALERT\_3\_G Percentage of I>2sig(I) Data at Theta(Max) Still 74% Note

PLAT910\_ALERT\_3\_G Missing # of FCF Reflection(s) Below Theta(Min). 2 Note

-1 0 1, 0 0 2,

PLAT933\_ALERT\_2\_G Number of HKL-OMIT Records in Embedded .res File 5 Note

0 0 2, -1 0 1, 0 1 3, -1 1 2, 1 2 0,

PLAT969\_ALERT\_5\_G The 'Henn et al.' R-Factor-gap value ..... 4.520 Note

Predicted wR2: Based on SigI\*\*2 3.62 or SHELX Weight 15.06

PLAT978\_ALERT\_2\_G Number C-C Bonds with Positive Residual Density. 9 Info

---

- 0 **ALERT level A** = Most likely a serious problem - resolve or explain
- 0 **ALERT level B** = A potentially serious problem, consider carefully
- 7 **ALERT level C** = Check. Ensure it is not caused by an omission or oversight
- 16 **ALERT level G** = General information/check it is not something unexpected
- 
- 3 ALERT type 1 CIF construction/syntax error, inconsistent or missing data
- 5 ALERT type 2 Indicator that the structure model may be wrong or deficient
- 6 ALERT type 3 Indicator that the structure quality may be low
- 8 ALERT type 4 Improvement, methodology, query or suggestion
- 1 ALERT type 5 Informative message, check
-

---

It is advisable to attempt to resolve as many as possible of the alerts in all categories. Often the minor alerts point to easily fixed oversights, errors and omissions in your CIF or refinement strategy, so attention to these fine details can be worthwhile. In order to resolve some of the more serious problems it may be necessary to carry out additional measurements or structure refinements. However, the purpose of your study may justify the reported deviations and the more serious of these should normally be commented upon in the discussion or experimental section of a paper or in the "special\_details" fields of the CIF. checkCIF was carefully designed to identify outliers and unusual parameters, but every test has its limitations and alerts that are not important in a particular case may appear. Conversely, the absence of alerts does not guarantee there are no aspects of the results needing attention. It is up to the individual to critically assess their own results and, if necessary, seek expert advice.

### **Publication of your CIF in IUCr journals**

A basic structural check has been run on your CIF. These basic checks will be run on all CIFs submitted for publication in IUCr journals (*Acta Crystallographica*, *Journal of Applied Crystallography*, *Journal of Synchrotron Radiation*); however, if you intend to submit to *Acta Crystallographica Section C* or *E* or *IUCrData*, you should make sure that full publication checks are run on the final version of your CIF prior to submission.

### **Publication of your CIF in other journals**

Please refer to the *Notes for Authors* of the relevant journal for any special instructions relating to CIF submission.

---

**PLATON version of 11/11/2024; check.def file version of 11/11/2024**

Datablock shelx - ellipsoid plot

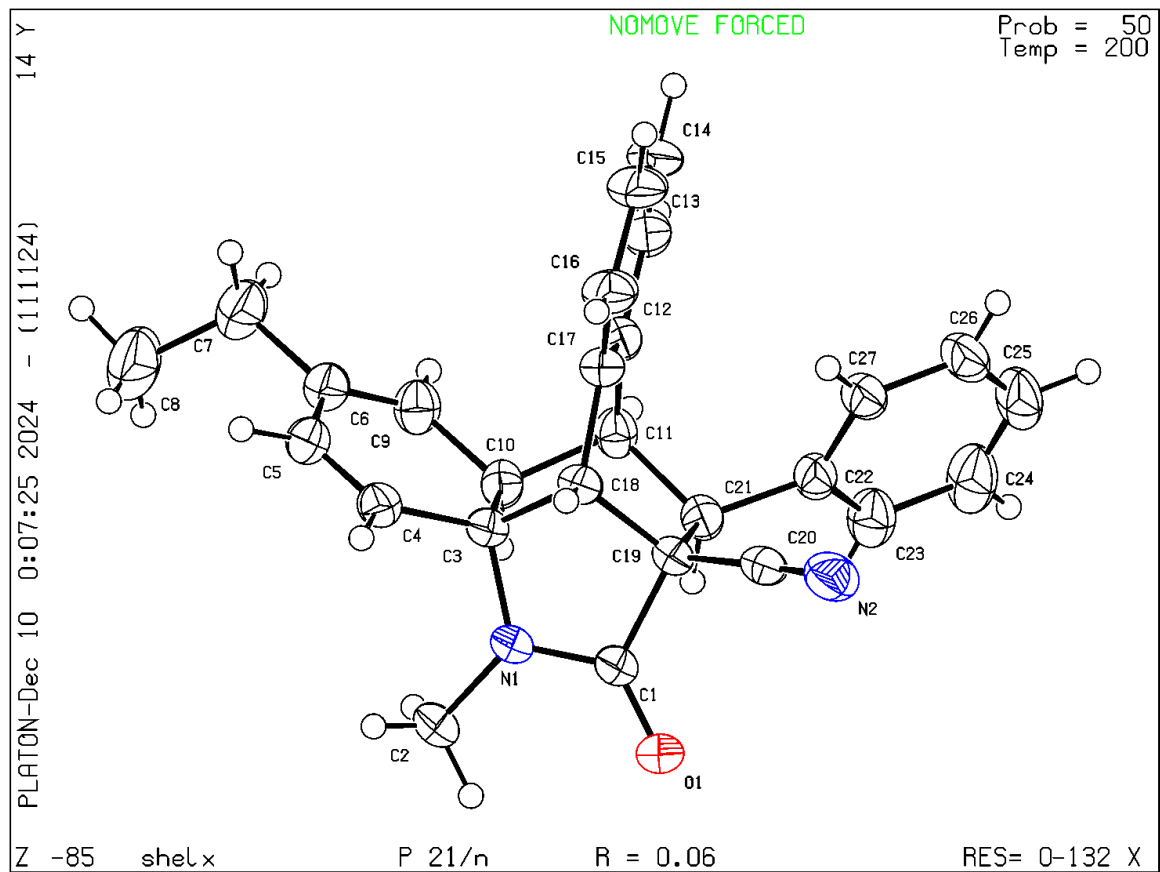



---

The following ALERTS were generated. Each ALERT has the format

**test-name\_ALERT\_alert-type\_alert-level.**

Click on the hyperlinks for more details of the test.

---

● **Alert level G**

|                   |                                 |                   |               |      |             |
|-------------------|---------------------------------|-------------------|---------------|------|-------------|
| PLAT230_ALERT_2_G | Hirshfeld Test Diff for         | C2                | --C24         | .    | 6.4 s.u.    |
| PLAT398_ALERT_2_G | Deviating C-O-C Angle From      | 120               | for O2        | .    | 60.3 Degree |
| PLAT793_ALERT_4_G | Model has Chirality at          | C2                | (Centro SPGR) | S    | Verify      |
| PLAT793_ALERT_4_G | Model has Chirality at          | C3                | (Centro SPGR) | R    | Verify      |
| PLAT793_ALERT_4_G | Model has Chirality at          | C4                | (Centro SPGR) | S    | Verify      |
| PLAT793_ALERT_4_G | Model has Chirality at          | C7                | (Centro SPGR) | S    | Verify      |
| PLAT793_ALERT_4_G | Model has Chirality at          | C8                | (Centro SPGR) | R    | Verify      |
| PLAT793_ALERT_4_G | Model has Chirality at          | C9                | (Centro SPGR) | S    | Verify      |
| PLAT793_ALERT_4_G | Model has Chirality at          | C10               | (Centro SPGR) | S    | Verify      |
| PLAT793_ALERT_4_G | Model has Chirality at          | C11               | (Centro SPGR) | S    | Verify      |
| PLAT909_ALERT_3_G | Percentage of I>2sig(I) Data at | Theta(Max)        | Still         | 72%  | Note        |
| PLAT967_ALERT_5_G | Note: Two-Theta Cutoff Value in | Embedded .res     | ..            | 50.0 | Degree      |
| PLAT978_ALERT_2_G | Number C-C Bonds with Positive  | Residual Density. |               | 12   | Info        |

---

0 **ALERT level A** = Most likely a serious problem - resolve or explain  
0 **ALERT level B** = A potentially serious problem, consider carefully  
0 **ALERT level C** = Check. Ensure it is not caused by an omission or oversight  
13 **ALERT level G** = General information/check it is not something unexpected

0 ALERT type 1 CIF construction/syntax error, inconsistent or missing data  
3 ALERT type 2 Indicator that the structure model may be wrong or deficient  
1 ALERT type 3 Indicator that the structure quality may be low  
8 ALERT type 4 Improvement, methodology, query or suggestion  
1 ALERT type 5 Informative message, check

---

It is advisable to attempt to resolve as many as possible of the alerts in all categories. Often the minor alerts point to easily fixed oversights, errors and omissions in your CIF or refinement strategy, so attention to these fine details can be worthwhile. In order to resolve some of the more serious problems it may be necessary to carry out additional measurements or structure refinements. However, the purpose of your study may justify the reported deviations and the more serious of these should normally be commented upon in the discussion or experimental section of a paper or in the "special\_details" fields of the CIF. checkCIF was carefully designed to identify outliers and unusual parameters, but every test has its limitations and alerts that are not important in a particular case may appear. Conversely, the absence of alerts does not guarantee there are no aspects of the results needing attention. It is up to the individual to critically assess their own results and, if necessary, seek expert advice.

### **Publication of your CIF in IUCr journals**

A basic structural check has been run on your CIF. These basic checks will be run on all CIFs submitted for publication in IUCr journals (*Acta Crystallographica*, *Journal of Applied Crystallography*, *Journal of Synchrotron Radiation*); however, if you intend to submit to *Acta Crystallographica Section C* or *E* or *IUCrData*, you should make sure that full publication checks are run on the final version of your CIF prior to submission.

### **Publication of your CIF in other journals**

Please refer to the *Notes for Authors* of the relevant journal for any special instructions relating to CIF submission.

---

**PLATON version of 12/09/2022; check.def file version of 09/08/2022**

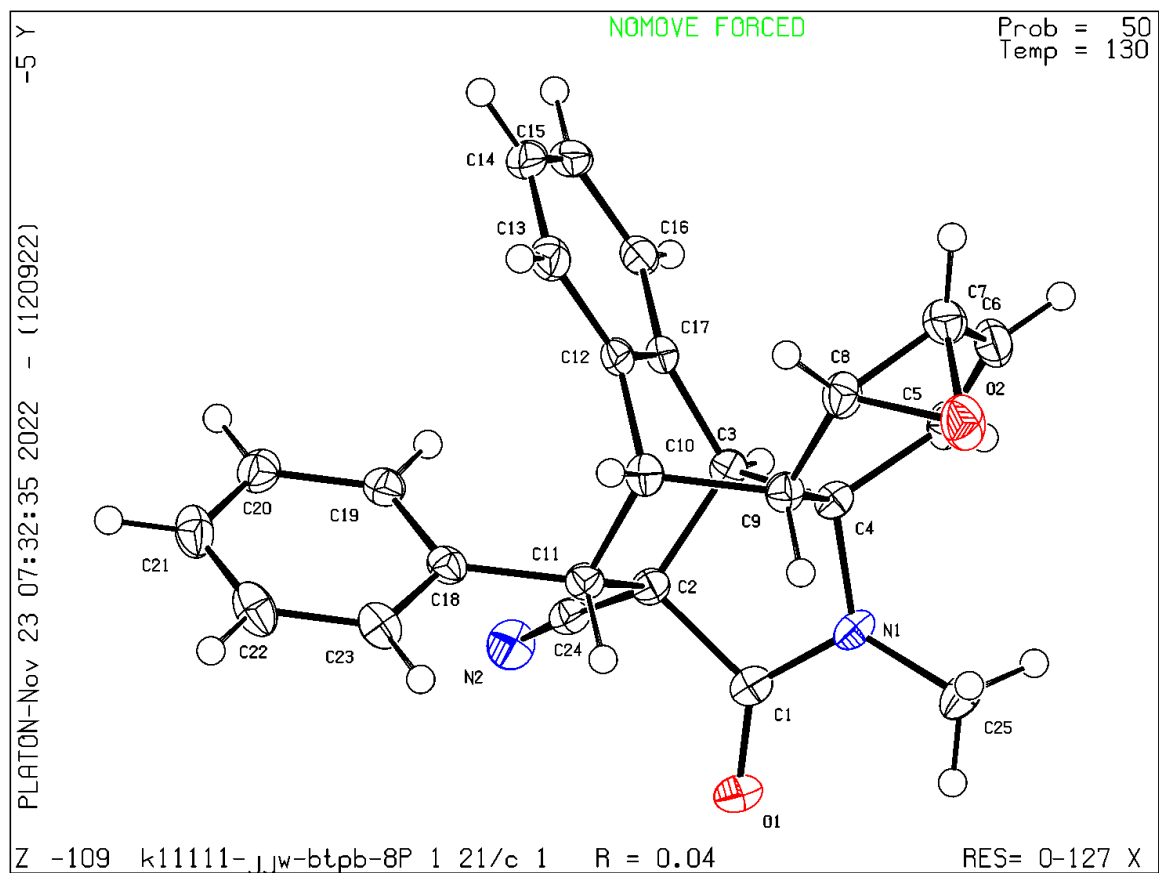

Supplement: d5gc04174k1.pdf [file d5gc04174k1.pdf]
